# Supplementary material for: Identification of PARP-7 substrates reveals a role for MARylation in microtubule control in ovarian cancer cells
Source: eLife. 2021 Jan 21;10:e60481. doi: 10.7554/eLife.60481 (PMC7884071; doi:10.7554/eLife.60481)
Supplement: Supplementary file 1. — RNA-seq was performed after siRNA-mediated knockdown (KD) of PARP7 in OVCAR4 cells. Three different siRNAs were used versus a control siRNA. The table lists the expression values in FPKM obtained using the Cufflinks pipeline described in the Methods for all the genes across all the samples for the RNA-seq data. [file elife-60481-supp1.xlsx]

## Sheet: Legend
Supplemental Table S1. RNA-seq analysis of gene expression in ovarian cancer cells following PARP-7 depletion. RNA-seq was performed after siRNA-mediated knockdown (KD) of PARP7 in OVCAR4 cells. Three different siRNAs were used versus a control siRNA. The table lists the expression values in FPKM obtained using the Cufflinks pipeline described in the Methods for all the genes across all the sampl…

## Sheet: Gene Expression
tracking_id	gene_id	gene_short_name	tss_id	locus	PARP7_1_SiRNANeg_FPKM	PARP7_1_SiRNANeg_conf_lo	PARP7_1_SiRNANeg_conf_hi	PARP7_SiRNA1_FPKM	PARP7_SiRNA1_conf_lo	PARP7_SiRNA1_conf_hi	PARP7_SiRNA2_FPKM	PARP7_SiRNA2_conf_lo	PARP7_SiRNA2_conf_hi	PARP7_SiRNA3_FPKM	PARP7_SiRNA3_conf_lo	PARP7_SiRNA3_conf_hi
XLOC_000001	XLOC_000001	DDX11L1	TSS1	chr1:11873-29370	0	0	0	0	0	0	0	0	0	0	0	0
XLOC_000002	XLOC_000002	OR4F5	TSS2	chr1:69090-70008	0	0	0	0	0	0	0	0	0	0	0	0
XLOC_000003	XLOC_000003	LOC100132062,LOC100133331	TSS3	chr1:323891-328581	0.020396	0	0.0715817	0.00667271	0	0.0462521	0.019281	0	0.0721833	0.0145539	0	0.0617886
XLOC_000004	XLOC_000004	OR4F3	TSS4	chr1:367658-368597	0	0	0	0	0	0	0	0	0	0	0	0
XLOC_000005	XLOC_000005	LOC643837	TSS5,TSS6	chr1:762970-794826	1.08317	0.553673	1.61267	0.816568	0.388349	1.24479	1.24441	0.601799	1.88702	1.30996	0.72029	1.89963
XLOC_000006	XLOC_000006	SAMD11	TSS7	chr1:861120-894679	0.702262	0	2.14144	0.350847	0	1.33398	1.61852	0	4.04511	0.669202	0	2.28882
XLOC_000007	XLOC_000007	KLHL17	TSS8	chr1:895966-901099	2.12531	1.193	3.05761	3.05496	1.88047	4.22946	2.10489	1.18134	3.02844	1.85163	1.00169	2.70157
XLOC_000008	XLOC_000008	PLEKHN1	TSS9	chr1:901876-910484	1.91126	1.02956	2.79296	2.25636	1.2897	3.22303	2.78763	1.65543	3.91982	3.57948	2.16655	4.99241
XLOC_000009	XLOC_000009	ISG15	TSS10	chr1:948846-949919	186.795	139.696	233.894	140.487	103.733	177.242	445.704	340.238	551.169	166.805	123.513	210.097
XLOC_000010	XLOC_000010	AGRN	TSS11	chr1:955502-991499	68.9013	52.4687	85.3339	67.565	51.0807	84.0494	83.5156	63.6844	103.347	68.2723	51.5881	84.9564
XLOC_000011	XLOC_000011	LOC254099	TSS12	chr1:1072396-1079434	0	0	0	0	0	0	0	0	0	0	0	0
XLOC_000012	XLOC_000012	MIR200B	TSS13	chr1:1102483-1102578	0	0	0	0	0	0	0	0	0	0	0	0
XLOC_000013	XLOC_000013	MIR200A	TSS14	chr1:1103242-1103332	0	0	0	0	0	0	0	0	0	0	0	0
XLOC_000014	XLOC_000014	MIR429	TSS15	chr1:1104384-1104467	0	0	0	0	0	0	0	0	0	0	0	0
XLOC_000015	XLOC_000015	TTLL10	TSS16,TSS17	chr1:1109285-1133313	0.130625	0	0.294885	0.0488247	0	0.159893	0.0983149	0	0.233349	0.113991	0	0.267527
XLOC_000016	XLOC_000016	B3GALT6	TSS18	chr1:1167628-1170420	15.0819	10.9149	19.2489	13.72	9.96998	17.4701	9.79392	6.93251	12.6553	12.4476	8.99693	15.8983
XLOC_000017	XLOC_000017	SCNN1D	TSS19	chr1:1215815-1227409	0.21856	0.0376607	0.39946	0.150293	0	0.303437	0.223394	0.0405638	0.406225	0.168737	0.00357414	0.3339
XLOC_000018	XLOC_000018	PUSL1	TSS20	chr1:1243993-1260067	16.1755	7.33177	25.0192	17.959	9.25315	26.6649	13.3344	6.46934	20.1994	16.922	8.37784	25.4662
XLOC_000019	XLOC_000019	GLTPD1	TSS21	chr1:1260142-1264276	23.7626	17.3774	30.1479	15.5756	11.2136	19.9377	23.4596	17.2276	29.6917	21.611	15.7289	27.493
XLOC_000020	XLOC_000020	TAS1R3	TSS22	chr1:1266725-1269844	0.275084	0.0274684	0.522699	0.188547	0.0149746	0.362119	0.165041	0	0.335545	0.246633	0.0294929	0.463773
XLOC_000021	XLOC_000021	LOC148413	TSS23	chr1:1334909-1342693	6.70008	2.40467	10.9955	6.10054	2.01546	10.1856	5.85983	2.02277	9.69688	5.85748	2.12901	9.58594
XLOC_000022	XLOC_000022	TMEM88B	TSS24	chr1:1361507-1363167	0	0	0	0.0463944	0	0.264853	0	0	0	0	0	0
XLOC_000023	XLOC_000023	VWA1	TSS25	chr1:1370902-1378262	4.15758	2.86781	5.44735	4.1886	2.90969	5.46752	4.19152	2.92542	5.45761	3.73619	2.53429	4.9381
XLOC_000024	XLOC_000024	ATAD3C	TSS26	chr1:1385068-1405538	0.0444006	0	0.11347	0	0	0	0.0411945	0	0.100077	0.0472028	0	0.111603
XLOC_000025	XLOC_000025	ATAD3B	TSS27	chr1:1407163-1431582	10.2065	7.02063	13.3923	8.3435	5.73894	10.9481	6.96215	4.67944	9.24487	7.45028	5.03675	9.8638
XLOC_000026	XLOC_000026	ATAD3A	TSS28,TSS29	chr1:1447522-1470067	24.7728	18.1849	31.3607	21.7084	15.9901	27.4267	17.9192	13.05	22.7885	27.8984	20.7555	35.0413
XLOC_000027	XLOC_000027	MIB2	TSS30,TSS31	chr1:1550794-1565990	9.88418	6.98934	12.779	8.69191	6.11596	11.2679	8.44162	5.92969	10.9535	8.95904	6.25677	11.6613
XLOC_000028	XLOC_000028	MMP23A,MMP23B	TSS32,TSS33	chr1:1567559-1570030	0.0306594	0	0.226188	0	0	0	0	0	0	0	0	0
XLOC_000029	XLOC_000029	MMP23A	TSS34	chr1:1571099-1655791	0	0	0	0	0	0	0	0	0	0	0	0
XLOC_000030	XLOC_000030	CALML6	TSS35	chr1:1846265-1848733	0.0713683	0	0.273552	0.0629983	0	0.22991	0.0801871	0	0.276497	0	0	0
XLOC_000031	XLOC_000031	GABRD	TSS36	chr1:1950767-1962192	0.133217	0	0.30946	0.0365798	0	0.115458	0.0704714	0	0.190082	0.012043	0	0.067844
XLOC_000032	XLOC_000032	PRKCZ	TSS37,TSS38,TSS39,TSS40	chr1:1981908-2144159	14.4117	8.9564	19.867	14.2387	8.66127	19.8161	12.7136	7.94779	17.4795	14.1007	9.01704	19.1844
XLOC_000033	XLOC_000033	SKI	TSS41	chr1:2160133-2241652	20.2283	15.1531	25.3035	17.2218	12.9112	21.5323	14.8198	11.0716	18.5679	11.1644	8.27503	14.0537
XLOC_000034	XLOC_000034	RER1	TSS42	chr1:2323213-2344010	28.6193	20.1684	37.0702	28.6972	20.3089	37.0855	16.1448	10.8171	21.4724	28.7269	20.2499	37.2038
XLOC_000035	XLOC_000035	PLCH2	TSS43	chr1:2407753-2436964	0.0844798	0	0.169685	0.0254673	0	0.0654767	0.0362352	0	0.0971512	0.0340948	0	0.0843733
XLOC_000036	XLOC_000036	TNFRSF14	TSS44	chr1:2487207-2495267	0.149043	0	0.31933	0.263146	0.0253433	0.500949	0.383267	0.0714459	0.695089	0.236768	0	0.477373
XLOC_000037	XLOC_000037	FAM213B	TSS45,TSS46	chr1:2517898-2564481	6.37984	4.32506	8.43462	5.62477	3.77595	7.4736	6.85209	4.7646	8.93958	5.96108	4.00366	7.9185
XLOC_000038	XLOC_000038	ACTRT2	TSS47	chr1:2938045-2939467	0	0	0	0	0	0	0	0	0	0	0	0
XLOC_000039	XLOC_000039	PRDM16	TSS48	chr1:2985741-3355185	0.0355251	0	0.0745321	0.025299	0	0.0568966	0.0408523	0	0.0849712	0.0147302	0	0.0406501
XLOC_000040	XLOC_000040	MIR4251	TSS49	chr1:2985741-3355185	0	0	0	0	0	0	0	0	0	0	0	0
XLOC_000041	XLOC_000041	ARHGEF16	TSS50	chr1:3371146-3397677	5.88883	3.92013	7.85753	9.23015	6.46642	11.9939	6.84721	4.67485	9.01958	5.83609	3.87135	7.80083
XLOC_000042	XLOC_000042	TPRG1L	TSS51	chr1:3541555-3546694	24.2624	17.8741	30.6507	10.4322	7.38496	13.4795	21.4449	15.7835	27.1064	18.3514	13.3568	23.3459
XLOC_000043	XLOC_000043	TP73	TSS52,TSS53,TSS54	chr1:3569128-3663937	0.503553	0.0535832	0.953522	0.536809	0.0827804	0.990837	0.441219	0.0440178	0.83842	0.280727	0	0.611881
XLOC_000044	XLOC_000044	CCDC27	TSS55	chr1:3668964-3688209	0.0268031	0	0.105042	0.029081	0	0.096378	0.0269867	0	0.0867979	0.047037	0	0.143002
XLOC_000045	XLOC_000045	SMIM1	TSS56	chr1:3689351-3692546	3.65953	1.33965	5.97942	5.06657	2.34486	7.78828	4.26348	1.84879	6.67818	3.44492	1.25901	5.63083
XLOC_000046	XLOC_000046	DFFB	TSS57	chr1:3773844-3801993	2.03945	1.20158	2.87732	1.76091	1.01942	2.50241	1.70396	0.973786	2.43414	1.3419	0.735989	1.94781
XLOC_000047	XLOC_000047	LOC100133612	TSS58	chr1:3816967-3832011	0.132347	0	0.299185	0.0741163	0	0.184727	0.0782229	0	0.192994	0.107709	0	0.247862
XLOC_000048	XLOC_000048	LOC728716	TSS59	chr1:4000671-4012643	0	0	0	0	0	0	0	0	0	0	0	0
XLOC_000049	XLOC_000049	LOC284661	TSS60	chr1:4472110-4484744	0	0	0	0	0	0	0	0	0	0.0106797	0	0.0612779
XLOC_000050	XLOC_000050	AJAP1	TSS61	chr1:4715104-4843851	36.355	26.7424	45.9676	33.0377	24.3096	41.7658	56.4437	42.1461	70.7413	63.8901	47.1804	80.5999
XLOC_000051	XLOC_000051	MIR4417	TSS62	chr1:5624130-5624203	0	0	0	0	0	0	0	0	0	0	0	0
XLOC_000052	XLOC_000052	KCNAB2	TSS63,TSS64,TSS65,TSS66,TSS67	chr1:5922869-6161253	4.94056	3.13423	6.7469	7.34012	4.93919	9.74105	5.72508	3.79131	7.65885	7.9624	5.37502	10.5498
XLOC_000053	XLOC_000053	RNF207	TSS68	chr1:6266188-6296044	2.451	0	5.9648	1.60777	0	4.01573	2.32344	0.239931	4.40695	2.50614	0.363788	4.6485
XLOC_000054	XLOC_000054	HES3	TSS69	chr1:6304251-6305638	0	0	0	0	0	0	0	0	0	0	0	0
XLOC_000055	XLOC_000055	ESPN	TSS70	chr1:6484847-6521004	1.88214	1.06986	2.69441	1.55895	0.883222	2.23469	2.44601	1.45365	3.43837	1.13276	0.590254	1.67527
XLOC_000056	XLOC_000056	TAS1R1	TSS71	chr1:6615337-6639817	0.0756618	0	0.195539	0	0	0	0.0109967	0	0.0822692	0	0	0
XLOC_000057	XLOC_000057	ZBTB48	TSS72	chr1:6640062-6649340	5.8054	3.84075	7.77005	5.41828	3.55566	7.28089	5.61925	3.65587	7.58263	4.74452	3.03059	6.45845
XLOC_000058	XLOC_000058	PHF13	TSS73	chr1:6673755-6684093	12.4839	9.10204	15.8658	13.2932	9.753	16.8334	10.7958	7.84749	13.7441	9.84646	7.12024	12.5727
XLOC_000059	XLOC_000059	THAP3	TSS74,TSS75	chr1:6684924-6761966	7.39817	0	15.6041	9.15167	0.92265	17.3807	8.65937	0.929814	16.3889	9.38387	0.765457	18.0023
XLOC_000060	XLOC_000060	CAMTA1	TSS76	chr1:6845383-7829766	80.1465	58.2222	102.071	81.1683	58.3156	104.021	65.893	48.0211	83.7649	78.1248	56.9889	99.2608
XLOC_000061	XLOC_000061	VAMP3	TSS77	chr1:7831328-7841492	80.6272	61.4883	99.7662	80.2157	60.6268	99.8046	87.5219	66.8702	108.174	21.0625	15.392	26.733
XLOC_000062	XLOC_000062	PER3	TSS78	chr1:7844762-7905237	2.52782	1.70433	3.35132	2.89757	1.97613	3.81901	2.65176	1.79344	3.51007	2.39323	1.60593	3.18052
XLOC_000063	XLOC_000063	PARK7	TSS79	chr1:8021713-8045342	165.525	124.98	206.069	178.521	135.906	221.136	166.15	126.241	206.06	211.6	160.896	262.305
XLOC_000064	XLOC_000064	SLC45A1	TSS80	chr1:8384389-8404227	0.0483801	0	0.144858	0.0702184	0	0.173805	0.081181	0	0.216639	0.0916273	0	0.215929
XLOC_000065	XLOC_000065	ENO1-AS1	TSS81	chr1:8921058-8939943	0.399319	0	11.7974	1.67104	0	27.8495	1.48798	0	26.9139	1.49862	0	28.3639
XLOC_000066	XLOC_000066	CA6	TSS82	chr1:9005892-9035148	0.0260741	0	0.342138	0	0	0	0.0361758	0	0.373548	0	0	0
XLOC_000067	XLOC_000067	H6PD	TSS83	chr1:9294862-9331394	5.08128	3.7295	6.43307	4.03755	2.93759	5.13751	5.95313	4.39175	7.5145	4.58158	3.3432	5.81996
XLOC_000068	XLOC_000068	SPSB1	TSS84	chr1:9352940-9429590	15.5631	11.4343	19.6919	14.4714	10.6783	18.2645	14.6445	10.8073	18.4817	14.2658	10.4517	18.0799
XLOC_000069	XLOC_000069	SLC25A33	TSS85	chr1:9599527-9642831	49.2615	36.6011	61.9219	41.9229	31.2845	52.5613	40.3116	29.8589	50.7643	43.7305	32.4347	55.0262
XLOC_000070	XLOC_000070	TMEM201	TSS86	chr1:9648931-9674935	7.87247	5.55535	10.1896	9.43964	6.83048	12.0488	7.67083	5.48045	9.86121	10.7219	7.7184	13.7254
XLOC_000071	XLOC_000071	PIK3CD	TSS87	chr1:9711789-9884550	4.6751	0.770686	8.57951	3.96275	0	8.41664	4.98416	0.949058	9.01926	3.50024	0	7.18615
XLOC_000072	XLOC_000072	NMNAT1	TSS88	chr1:10003485-10045556	4.83977	3.31524	6.3643	3.57298	2.36941	4.77655	3.24932	2.13579	4.36284	4.32552	2.92393	5.72711
XLOC_000073	XLOC_000073	RBP7	TSS89	chr1:10057254-10076078	12.4519	7.11884	17.785	13.115	7.79125	18.4387	14.7994	8.91242	20.6864	17.0108	10.5196	23.5021
XLOC_000074	XLOC_000074	UBE4B	TSS90	chr1:10093040-10241296	22.2201	16.6919	27.7484	24.5586	18.5651	30.552	21.3224	16.0372	26.6076	22.5865	16.9993	28.1737
XLOC_000075	XLOC_000075	KIF1B	TSS91	chr1:10270763-10441661	21.8956	16.6342	27.157	13.7099	10.3072	17.1126	9.68252	7.25911	12.1059	13.2421	10.0025	16.4816
XLOC_000076	XLOC_000076	PGD	TSS92	chr1:10459084-10480201	155.921	118.174	193.668	129.233	97.604	160.862	156.72	118.713	194.728	158.031	119.679	196.383
XLOC_000077	XLOC_000077	APITD1,APITD1-CORT,CORT	TSS93,TSS94,TSS95	chr1:10490158-10512060	12.4352	8.46085	16.4095	14.941	10.5493	19.3327	10.1314	6.93138	13.3315	14.2602	9.97068	18.5497
XLOC_000078	XLOC_000078	PEX14	TSS96	chr1:10535002-10690815	19.9764	14.3383	25.6146	21.8575	15.7419	27.9732	18.4158	13.1674	23.6643	18.9295	13.4451	24.4139
XLOC_000079	XLOC_000079	TARDBP	TSS97	chr1:11072678-11085549	54.1606	40.9843	67.337	52.5429	39.8038	65.2821	49.6819	37.5825	61.7813	50.5899	38.3282	62.8516
XLOC_000080	XLOC_000080	MTOR-AS1	TSS98	chr1:11166587-11322608	0.36381	0	2.69113	0.427921	0	3.10596	0.229359	0	2.50747	0.731917	0	5.20437
XLOC_000081	XLOC_000081	ANGPTL7	TSS99	chr1:11166587-11322608	0.0115554	0	0.201868	0	0	0	0.010493	0	0.215027	0	0	0
XLOC_000082	XLOC_000082	UBIAD1	TSS100	chr1:11333254-11348491	3.05449	1.98043	4.12856	5.18961	3.58015	6.79906	3.79279	2.54037	5.04522	5.40758	3.74388	7.07128
XLOC_000083	XLOC_000083	PTCHD2	TSS101	chr1:11539294-11597640	0.00667208	0	0.0297335	0	0	0	0.00452473	0	0.0272403	0	0	0
XLOC_000084	XLOC_000084	FBXO44	TSS102,TSS103	chr1:11708417-11723384	6.44632	2.84634	10.0463	8.01943	3.74516	12.2937	7.03793	2.53921	11.5366	7.09113	2.73192	11.4503
XLOC_000085	XLOC_000085	FBXO6	TSS104	chr1:11724149-11734409	12.3035	8.35688	16.2502	7.32296	4.67507	9.97085	14.4871	10.0047	18.9694	7.32987	4.63178	10.028
XLOC_000086	XLOC_000086	DRAXIN	TSS105	chr1:11751780-11780336	0.170323	0	0.373195	0.041167	0	0.133198	0.192772	0	0.404768	0.126229	0	0.298521
XLOC_000087	XLOC_000087	AGTRAP	TSS106	chr1:11796141-11810828	59.239	44.626	73.8519	71.1151	53.4397	88.7905	60.9448	45.8092	76.0805	62.8569	47.0857	78.6281
XLOC_000088	XLOC_000088	CLCN6,NPPA-AS1	TSS107,TSS108	chr1:11845786-11907840	5.04681	3.0553	7.03831	6.43451	3.91367	8.95535	4.30685	2.40172	6.21198	5.77115	3.56407	7.97824
XLOC_000089	XLOC_000089	PLOD1	TSS109	chr1:11994723-12035599	92.0443	70.3334	113.755	87.7612	66.8156	108.707	92.3345	70.7378	113.931	100.242	76.3294	124.155
XLOC_000090	XLOC_000090	MFN2	TSS110	chr1:12040237-12073572	47.902	36.2141	59.5899	21.401	16.0543	26.7478	33.8257	25.4948	42.1566	54.4375	41.2525	67.6225
XLOC_000091	XLOC_000091	MIIP	TSS111	chr1:12079298-12092106	16.9	12.0242	21.7757	14.0751	9.96431	18.1858	17.1805	12.2851	22.076	15.317	10.8505	19.7835
XLOC_000092	XLOC_000092	TNFRSF8	TSS112,TSS113	chr1:12123433-12204264	0.0721263	0	0.165056	0.0462365	0	0.116914	0.081928	0	0.173126	0.0815764	0	0.177093
XLOC_000093	XLOC_000093	MIR4632,TNFRSF1B	TSS114,TSS115	chr1:12227059-12269277	0.227819	0	1.6335	0.427629	0	1.84486	0.441716	0	1.85837	0.37743	0	1.79156
XLOC_000094	XLOC_000094	VPS13D	TSS116	chr1:12290112-12572098	4.91977	3.66081	6.17872	4.26652	3.15919	5.37386	4.95377	3.6897	6.21785	4.08689	3.00285	5.17092
XLOC_000095	XLOC_000095	SNORA59A	TSS117	chr1:12290112-12572098	0	0	0	0	0	0	0	0	0	0	0	0
XLOC_000096	XLOC_000096	AADACL4	TSS118	chr1:12704565-12727097	0	0	0	0	0	0	0	0	0	0	0	0
XLOC_000097	XLOC_000097	AADACL3	TSS119	chr1:12776117-12788726	0	0	0	0	0	0	0	0	0	0	0	0
XLOC_000098	XLOC_000098	C1orf158	TSS120	chr1:12806162-12821102	0	0	0	0	0	0	0.0247816	0	0.144599	0	0	0
XLOC_000099	XLOC_000099	PRAMEF12	TSS121	chr1:12834983-12838048	0	0	0	0	0	0	0	0	0	0	0	0
XLOC_000100	XLOC_000100	PRAMEF1	TSS122	chr1:12851545-12856777	0.0672719	0	0.182845	0.116538	0	0.272986	0.157571	0	0.337273	0.0408147	0	0.123281
XLOC_000101	XLOC_000101	PRAMEF2	TSS123	chr1:12916940-12921764	0	0	0	0	0	0	0	0	0	0	0	0
XLOC_000102	XLOC_000102	PRAMEF7,PRAMEF8	TSS124,TSS125	chr1:12976449-12980568	0	0	0	0	0	0	0	0	0	0	0	0
XLOC_000103	XLOC_000103	PRAMEF22	TSS126	chr1:13035542-13038381	0	0	0	0	0	0	0	0	0	0	0	0
XLOC_000104	XLOC_000104	PRAMEF5	TSS127	chr1:13359818-13369057	0	0	0	0	0	0	0	0	0	0	0	0
XLOC_000105	XLOC_000105	PRAMEF9	TSS128	chr1:13421175-13428191	0	0	0	0	0	0	0	0	0	0	0	0
XLOC_000106	XLOC_000106	PRAMEF16	TSS129	chr1:13495253-13498259	0	0	0	0	0	0	0	0	0	0	0	0
XLOC_000107	XLOC_000107	PRAMEF20,PRAMEF21	TSS130,TSS131	chr1:13516065-13526943	0	0	0	0	0	0	0	0	0	0	0	0
XLOC_000108	XLOC_000108	PRAMEF9	TSS132	chr1:13641972-13648988	0	0	0	0	0	0	0	0	0	0	0	0
XLOC_000109	XLOC_000109	PRAMEF17	TSS133	chr1:13716087-13719064	0	0	0	0	0	0	0	0	0	0	0	0
XLOC_000110	XLOC_000110	PRAMEF20,PRAMEF21	TSS134,TSS135	chr1:13736906-13747803	0	0	0	0	0	0	0	0	0	0	0	0
XLOC_000111	XLOC_000111	PDPN	TSS136,TSS137	chr1:13910251-13944452	3.96361	2.57201	5.35522	3.26631	2.05925	4.47337	4.24306	2.78489	5.70122	3.72766	2.38896	5.06636
XLOC_000112	XLOC_000112	PRDM2	TSS138,TSS139,TSS140	chr1:14026734-14151574	13.2212	9.59473	16.8476	14.2924	10.4317	18.153	17.5935	13.0453	22.1417	11.9529	8.70252	15.2033
XLOC_000113	XLOC_000113	KAZN	TSS141,TSS142,TSS143,TSS144	chr1:14925212-15478960	20.8932	15.5095	26.277	22.865	17.1308	28.5992	22.2089	16.5036	27.9142	19.6525	14.5408	24.7642
XLOC_000114	XLOC_000114	TMEM51	TSS145,TSS146	chr1:15479027-15546974	16.8548	12.1403	21.5693	13.9008	10.0472	17.7544	10.0323	7.00619	13.0584	14.6414	10.5192	18.7635
XLOC_000115	XLOC_000115	FHAD1	TSS147	chr1:15573767-15724622	0.156345	0.0275223	0.285167	0.148678	0.0256181	0.271738	0.1328	0.018282	0.247318	0.199293	0.049577	0.349008
XLOC_000116	XLOC_000116	EFHD2	TSS148	chr1:15736390-15756839	20.9595	15.4582	26.4607	49.7628	37.3863	62.1393	61.6237	46.8412	76.4063	29.1386	21.592	36.6853
XLOC_000117	XLOC_000117	CTRC	TSS149	chr1:15764937-15773153	0.0763788	0	0.298591	0.064808	0	0.254669	0	0	0	0.0727041	0	0.258681
XLOC_000118	XLOC_000118	CELA2A	TSS150	chr1:15783222-15798586	0	0	0	0	0	0	0	0	0	0	0	0
XLOC_000119	XLOC_000119	CELA2B	TSS151	chr1:15802595-15817895	0	0	0	0.0225444	0	0.133006	0.030314	0	0.168501	0.031126	0	0.160105
XLOC_000120	XLOC_000120	DNAJC16	TSS152	chr1:15853351-15911605	6.84591	4.90726	8.78457	6.3055	4.49287	8.11813	6.11405	4.36986	7.85823	3.80965	2.60718	5.01213
XLOC_000121	XLOC_000121	DDI2,RSC1A1	TSS153,TSS154	chr1:15943952-15988217	9.36768	6.60606	12.1293	16.5541	11.9116	21.1966	15.2543	11.0789	19.4296	14.4008	10.2734	18.5281
XLOC_000122	XLOC_000122	PLEKHM2	TSS155	chr1:16010826-16061264	20.1662	15.0582	25.2743	18.2624	13.5909	22.9339	20.7704	15.5448	25.996	18.7719	13.9342	23.6096
XLOC_000123	XLOC_000123	SLC25A34	TSS156	chr1:16062808-16067884	0.1392	0	0.280296	0.0968199	0	0.208852	0.0943831	0	0.206738	0.0378614	0	0.107412
XLOC_000124	XLOC_000124	TMEM82	TSS157	chr1:16068986-16074292	0	0	0	0	0	0	0	0	0	0	0	0
XLOC_000125	XLOC_000125	FBLIM1	TSS158,TSS159,TSS160	chr1:16085254-16113084	77.1966	58.6219	95.7713	42.4516	31.9238	52.9794	87.5005	66.7496	108.251	67.6971	51.2957	84.0986
XLOC_000126	XLOC_000126	SPEN	TSS161	chr1:16160709-16266950	13.4463	10.1125	16.7801	13.3858	10.0851	16.6864	12.8554	9.6122	16.0986	11.8834	8.87734	14.8895
XLOC_000127	XLOC_000127	C1orf64	TSS162	chr1:16330730-16333184	0	0	0	0	0	0	0	0	0	0	0	0
XLOC_000128	XLOC_000128	CLCNKA	TSS163	chr1:16348485-16360545	0.108052	0	0.256104	0.111919	0	0.252522	0.105418	0	0.247868	0.011868	0	0.111727
XLOC_000129	XLOC_000129	CLCNKB	TSS164,TSS165	chr1:16370230-16383821	0.137636	0	0.30102	0.0932759	0	0.229774	0.211752	0.00997215	0.413532	0.0261951	0	0.113458
XLOC_000130	XLOC_000130	SZRD1	TSS166	chr1:16693524-16724643	4.61758	3.15969	6.07547	5.36154	3.74139	6.98168	5.27778	3.65358	6.90197	6.00772	4.21658	7.79886
XLOC_000131	XLOC_000131	NECAP2	TSS167	chr1:16767166-16786584	33.9288	25.3938	42.4638	20.2764	14.9664	25.5863	30.1432	22.5626	37.7238	25.0016	18.5471	31.456
XLOC_000132	XLOC_000132	MIR3675	TSS168	chr1:16875408-16875482	0	0	0	0	0	0	0	0	0	0	0	0
XLOC_000133	XLOC_000133	MST1P2	TSS169	chr1:16972068-16976915	0.0432999	0	0.124524	0.0927155	0	0.203357	0.0815827	0	0.181751	0.077049	0	0.181392
XLOC_000134	XLOC_000134	MIR3675	TSS170	chr1:17007749-17007823	0	0	0	0	0	0	0	0	0	0	0	0
XLOC_000135	XLOC_000135	CROCC	TSS171	chr1:17248444-17299474	1.60079	0.985018	2.21656	1.60312	1.00345	2.20279	1.50903	0.939171	2.07888	0.933724	0.52996	1.33749
XLOC_000136	XLOC_000136	PADI1	TSS172	chr1:17531620-17572501	0.0722648	0	0.149182	0.223717	0.0593789	0.388055	0.223471	0.0648924	0.38205	0.329488	0.109349	0.549627
XLOC_000137	XLOC_000137	PADI3	TSS173	chr1:17575592-17610727	0.313779	0.0912716	0.536286	0.212941	0.0423142	0.383569	0.31909	0.0927515	0.545428	0.287279	0.0732368	0.501321
XLOC_000138	XLOC_000138	PADI4	TSS174	chr1:17634689-17690495	0	0	0	0	0	0	0.0258249	0	0.0831638	0	0	0
XLOC_000139	XLOC_000139	PADI6	TSS175	chr1:17698740-17728195	0	0	0	0	0	0	0	0	0	0	0	0
XLOC_000140	XLOC_000140	ARHGEF10L	TSS176,TSS177	chr1:17866329-18024370	7.74127	5.52091	9.96163	5.84803	4.08548	7.61058	7.80433	5.61637	9.99229	6.41432	4.49098	8.33765
XLOC_000141	XLOC_000141	ACTL8	TSS178	chr1:18081807-18153558	2.56682	1.30092	3.83271	1.22567	0.509184	1.94215	1.15869	0.455087	1.86229	2.70354	1.45285	3.95424
XLOC_000142	XLOC_000142	IGSF21	TSS179	chr1:18434239-18704977	0	0	0	0	0	0	0	0	0	0	0	0
XLOC_000143	XLOC_000143	KLHDC7A	TSS180	chr1:18807423-18812480	0.272693	0.096062	0.449324	0.242029	0.078689	0.405369	0.4202	0.179376	0.661023	0.24983	0.0782301	0.42143
XLOC_000144	XLOC_000144	PAX7	TSS181	chr1:18957499-19075360	0	0	0	0	0	0	0	0	0	0	0	0
XLOC_000145	XLOC_000145	MRTO4	TSS182	chr1:19578074-19586622	33.9098	25.0708	42.7488	34.1384	25.3533	42.9236	34.0677	25.2918	42.8436	52.5789	39.4429	65.715
XLOC_000146	XLOC_000146	PQLC2	TSS183	chr1:19638739-19655794	11.5581	8.06416	15.052	12.4778	8.82651	16.1291	12.0341	8.45603	15.6122	11.6257	8.14706	15.1043
XLOC_000147	XLOC_000147	C1orf151-NBL1,MINOS1,NBL1	TSS184,TSS185,TSS186,TSS187,TSS188,TSS189	chr1:19923470-19984949	44.9395	33.2994	56.5795	33.1864	24.8538	41.519	44.4145	33.4886	55.3403	58.0353	43.5772	72.4934
XLOC_000148	XLOC_000148	HTR6	TSS190	chr1:19991779-20006055	0.802247	0.25684	1.34765	0.697528	0.222312	1.17274	0.288849	0.0189723	0.558726	0.289801	0.0125543	0.567047
XLOC_000149	XLOC_000149	OTUD3	TSS191	chr1:20208887-20239437	4.20512	2.982	5.42824	5.0143	3.5899	6.43871	3.09689	2.14128	4.0525	3.99519	2.82327	5.16711
XLOC_000150	XLOC_000150	PLA2G5	TSS192	chr1:20396700-20418394	0.0109659	0	0.0647808	0	0	0	0	0	0	0	0	0
XLOC_000151	XLOC_000151	PLA2G2F	TSS193	chr1:20465822-20476879	0	0	0	0	0	0	0.00943852	0	0.0546602	0	0	0
XLOC_000152	XLOC_000152	UBXN10	TSS194	chr1:20512577-20519942	0.649943	0.264105	1.03578	1.45698	0.770243	2.14371	0.780382	0.347526	1.21324	0.819657	0.36909	1.27022
XLOC_000153	XLOC_000153	VWA5B1	TSS195	chr1:20617411-20681387	0	0	0	0	0	0	0	0	0	0	0	0
XLOC_000154	XLOC_000154	FAM43B	TSS196	chr1:20878931-20881513	0.0805845	0	0.187507	0.0271165	0	0.084287	0.0265215	0	0.089025	0.0695268	0	0.170198
XLOC_000155	XLOC_000155	CDA	TSS197	chr1:20915443-20945400	14.3746	9.30771	19.4415	8.56752	5.17443	11.9606	15.6018	10.2218	20.9817	13.5925	8.67413	18.5109
XLOC_000156	XLOC_000156	PINK1	TSS198	chr1:20959947-20978004	15.7261	11.4387	20.0135	12.1893	8.74061	15.638	17.3068	12.671	21.9425	15.4154	11.1595	19.6712
XLOC_000157	XLOC_000157	LOC100506801	TSS199	chr1:21543739-21672034	0.0388303	0	0.530851	0.0109475	0	0.280305	0.0240427	0	0.386207	0.0316565	0	0.499139
XLOC_000158	XLOC_000158	NBPF3	TSS200	chr1:21766620-21811393	4.24988	2.86826	5.6315	2.60704	1.67434	3.53974	3.97351	2.67572	5.2713	3.96762	2.66093	5.27431
XLOC_000159	XLOC_000159	ALPL	TSS201	chr1:21835857-21904905	3.91274	2.5222	5.30327	2.57015	1.582	3.5583	4.75515	3.07313	6.43717	2.72112	1.62429	3.81796
XLOC_000160	XLOC_000160	LDLRAD2	TSS202	chr1:22138757-22263750	0.0179446	0	0.27969	0	0	0	0.0107001	0	0.231807	0	0	0
XLOC_000161	XLOC_000161	CELA3B	TSS203	chr1:22303417-22315847	0	0	0	0	0	0	0.0561611	0	0.195404	0.102477	0	0.311374
XLOC_000162	XLOC_000162	CELA3A	TSS204	chr1:22328148-22339035	0	0	0	0	0	0	0.0266721	0	0.150416	0	0	0
XLOC_000163	XLOC_000163	LINC00339	TSS205,TSS206	chr1:22351706-22357715	5.64197	3.24279	8.04115	6.19117	3.64843	8.73391	5.11787	2.8597	7.37603	2.56757	1.21181	3.92333
XLOC_000164	XLOC_000164	CDC42	TSS207	chr1:22379119-22419436	96.0309	72.5791	119.483	87.7422	66.5982	108.886	85.6271	64.7708	106.483	89.5228	67.8435	111.202
XLOC_000165	XLOC_000165	ZBTB40	TSS208	chr1:22778343-22857650	4.56354	3.32401	5.80306	3.01765	2.14899	3.8863	4.15384	3.025	5.28268	3.63285	2.61658	4.64912
XLOC_000166	XLOC_000166	EPHA8	TSS209	chr1:22890003-22930087	0.0862505	0	0.227393	0.0261087	0	0.114603	0.0929666	0	0.224914	0.0631504	0	0.181239
XLOC_000167	XLOC_000167	C1QA	TSS210	chr1:22963117-22966175	0	0	0	0	0	0	0	0	0	0	0	0
XLOC_000168	XLOC_000168	C1QC	TSS211	chr1:22970117-22974603	0	0	0	0	0	0	0	0	0	0	0	0
XLOC_000169	XLOC_000169	C1QB	TSS212	chr1:22979681-22988029	0	0	0	0	0	0	0	0	0	0	0	0
XLOC_000170	XLOC_000170	EPHB2	TSS213	chr1:23037330-23241823	4.05888	2.78781	5.32995	3.92243	2.70688	5.13798	4.22989	2.93484	5.52494	4.04539	2.78982	5.30097
XLOC_000171	XLOC_000171	MIR4684	TSS214	chr1:23037330-23241823	0	0	0	0	0	0	0	0	0	0	0	0
XLOC_000172	XLOC_000172	KDM1A	TSS215	chr1:23345940-23410184	34.8519	26.1498	43.554	26.3022	19.6195	32.9849	33.0299	24.7611	41.2987	34.8617	26.1231	43.6004
XLOC_000173	XLOC_000173	MIR3115	TSS216	chr1:23345940-23410184	0	0	0	0	0	0	0	0	0	0	0	0
XLOC_000174	XLOC_000174	C1orf213	TSS217,TSS218	chr1:23685940-23698330	0.934955	0	2.34228	1.14336	0	3.07517	0.802821	0	1.96024	1.27012	0	3.49565
XLOC_000175	XLOC_000175	MDS2	TSS219	chr1:23953823-23967056	0	0	0	0	0	0	0.0228572	0	0.13792	0	0	0
XLOC_000176	XLOC_000176	RPL11	TSS220	chr1:24018268-24022915	1431.97	1089.11	1774.83	1607.67	1216.13	1999.21	1533.52	1166.1	1900.94	1778.02	1340.97	2215.06
XLOC_000177	XLOC_000177	TCEB3	TSS221	chr1:24069855-24104787	15.9645	11.6638	20.2653	13.0237	9.42688	16.6206	16.308	11.8847	20.7313	16.8394	12.3494	21.3294
XLOC_000178	XLOC_000178	PITHD1	TSS222	chr1:24104875-24114722	37.0927	27.2298	46.9556	33.7313	24.7538	42.7088	47.5098	35.2782	59.7413	40.8759	30.321	51.4308
XLOC_000179	XLOC_000179	LYPLA2	TSS223	chr1:24117645-24122029	94.0217	71.249	116.795	96.5938	73.4187	119.769	89.6476	68.6476	110.648	96.7103	73.3517	120.069
XLOC_000180	XLOC_000180	MIR378F	TSS224	chr1:24255559-24255637	0	0	0	0	0	0	0	0	0	0	0	0
XLOC_000181	XLOC_000181	PNRC2	TSS225	chr1:24286300-24289949	84.7578	64.161	105.355	89.575	67.7704	111.38	81.3957	61.5726	101.219	97.3561	73.7532	120.959
XLOC_000182	XLOC_000182	LOC284632	TSS226	chr1:24526729-24538180	0	0	0	0	0	0	0	0	0	0	0	0
XLOC_000183	XLOC_000183	GRHL3	TSS227,TSS228,TSS229	chr1:24645811-24741587	1.12697	0.0844151	2.16952	0.90107	0	1.89459	4.03146	2.07186	5.99107	1.03004	0.106828	1.95324
XLOC_000184	XLOC_000184	NIPAL3	TSS230	chr1:24742244-24799473	9.61488	7.04545	12.1843	8.29947	6.05829	10.5406	17.2432	12.9157	21.5707	15.1915	11.3006	19.0823
XLOC_000185	XLOC_000185	RCAN3	TSS231,TSS232,TSS233,TSS234	chr1:24822822-24863510	13.1717	9.57015	16.7732	9.08179	6.52314	11.6404	13.9084	10.091	17.7258	10.8872	7.86925	13.9052
XLOC_000186	XLOC_000186	NCMAP	TSS235	chr1:24882566-24935818	1.03356	0.551342	1.51577	1.57865	0.930048	2.22725	1.52208	0.889549	2.1546	0.944464	0.494928	1.394
XLOC_000187	XLOC_000187	SRRM1	TSS236	chr1:24969593-24999772	39.734	30.0534	49.4146	50.2328	37.9438	62.5219	40.1737	30.3556	49.9917	51.1579	38.7299	63.5859
XLOC_000188	XLOC_000188	CLIC4	TSS237	chr1:25071759-25170815	114.111	86.9595	141.262	100.663	76.208	125.118	127.694	97.5307	157.858	110.692	83.856	137.528
XLOC_000189	XLOC_000189	RHD	TSS238	chr1:25598980-25656936	0.0332947	0	0.107779	0.0203914	0	0.0971785	0.016212	0	0.0762374	0	0	0
XLOC_000190	XLOC_000190	TMEM50A	TSS239	chr1:25664788-25747363	47.3616	35.5119	59.2113	51.7612	38.9743	64.5482	46.9724	35.2269	58.7179	44.6643	33.5931	55.7356
XLOC_000191	XLOC_000191	TMEM57	TSS240	chr1:25757387-25826698	9.09512	6.62462	11.5656	10.0423	7.31257	12.772	9.00197	6.55866	11.4453	7.07194	5.08299	9.06088
XLOC_000192	XLOC_000192	LDLRAP1	TSS241	chr1:25870075-25895377	9.3646	6.69841	12.0308	8.58294	6.13083	11.035	11.6834	8.50881	14.858	5.84717	4.0174	7.67695
XLOC_000193	XLOC_000193	MAN1C1	TSS242	chr1:25943958-26111258	0.120431	0	0.251587	0.180387	0.0262196	0.334554	0.128189	0.00208894	0.254289	0.110714	0	0.230985
XLOC_000194	XLOC_000194	SEPN1	TSS243	chr1:26126666-26144713	9.92462	7.22561	12.6236	6.60029	4.70085	8.49972	14.3974	10.6567	18.1381	9.4241	6.82664	12.0216
XLOC_000195	XLOC_000195	MTFR1L	TSS244,TSS245,TSS246	chr1:26146396-26159433	8.94958	6.04671	11.8525	13.0236	9.08679	16.9604	9.38934	6.37541	12.4033	10.4554	7.18263	13.7282
XLOC_000196	XLOC_000196	EXTL1	TSS247	chr1:26348270-26362954	0.0425781	0	0.1051	0.0300695	0	0.078801	0.0292789	0	0.0815083	0.0149618	0	0.0598771
XLOC_000197	XLOC_000197	PDIK1L	TSS248,TSS249	chr1:26437655-26452039	2.15717	1.38164	2.93271	5.22569	3.64913	6.80225	3.90512	2.69653	5.11371	3.43656	2.32437	4.54875
XLOC_000198	XLOC_000198	FAM110D	TSS250	chr1:26485510-26489119	0.0587936	0	0.182759	0.0786159	0	0.238305	0.115766	0	0.317031	0.0425975	0	0.159129
XLOC_000199	XLOC_000199	ZNF593	TSS251	chr1:26496387-26497364	47.2277	33.1375	61.3179	36.1215	24.9914	47.2517	39.8468	27.8942	51.7994	49.1943	34.699	63.6897
XLOC_000200	XLOC_000200	CNKSR1	TSS252	chr1:26503980-26516375	11.1194	7.86138	14.3774	9.46585	6.62848	12.3032	11.5057	8.16653	14.8449	9.0035	6.24513	11.7619
XLOC_000201	XLOC_000201	CATSPER4	TSS253	chr1:26517118-26529033	0.0174382	0	0.09597	0	0	0	0	0	0	0	0	0
XLOC_000202	XLOC_000202	CEP85	TSS254	chr1:26560692-26605299	13.9832	10.319	17.6474	9.13433	6.63218	11.6365	15.4447	11.445	19.4444	13.8303	10.2125	17.448
XLOC_000203	XLOC_000203	SH3BGRL3	TSS255	chr1:26606212-26608013	233.166	177.758	288.573	206.17	156.152	256.188	210.884	160.175	261.592	237.014	179.316	294.711
XLOC_000204	XLOC_000204	CD52	TSS256	chr1:26608772-26647014	0.273011	0	1.19049	0.242286	0	1.1237	0.376019	0	1.93183	0.1882	0	0.947838
XLOC_000205	XLOC_000205	LIN28A	TSS257	chr1:26737268-26756219	0	0	0	0.0264566	0	0.0677514	0.0234408	0	0.0647912	0.0339085	0	0.0824376
XLOC_000206	XLOC_000206	DHDDS	TSS258	chr1:26758772-26797795	13.5359	9.85875	17.213	16.8523	12.4219	21.2826	16.6701	12.2376	21.1026	13.5446	9.89096	17.1982
XLOC_000207	XLOC_000207	HMGN2	TSS259	chr1:26798901-26803133	127.678	96.5861	158.77	132.5	100.198	164.802	142.522	107.946	177.097	129.179	97.7974	160.561
XLOC_000208	XLOC_000208	RPS6KA1	TSS260,TSS261	chr1:26856248-26901520	40.8492	30.8418	50.8565	38.922	29.226	48.6181	43.942	33.3054	54.5786	46.3078	34.9371	57.6784
XLOC_000209	XLOC_000209	MIR1976	TSS262	chr1:26856248-26901520	0	0	0	0	0	0	0	0	0	0	0	0
XLOC_000210	XLOC_000210	ARID1A	TSS263	chr1:27022521-27108601	24.953	18.8569	31.0492	20.6037	15.5848	25.6226	18.5085	13.9752	23.0418	14.3016	10.7374	17.8657
XLOC_000211	XLOC_000211	PIGV	TSS264,TSS265	chr1:27114453-27124894	4.94095	3.2239	6.658	4.84734	3.16522	6.52946	5.24345	3.47088	7.01602	3.40647	2.12215	4.69079
XLOC_000212	XLOC_000212	ZDHHC18	TSS266	chr1:27153200-27182211	28.1168	21.0564	35.1772	17.22	12.7754	21.6646	32.5988	24.6372	40.5604	10.0672	7.22446	12.9099
XLOC_000213	XLOC_000213	SFN	TSS267	chr1:27189632-27190947	102.02	76.5411	127.498	75.9483	56.523	95.3736	146.968	111.174	182.762	169.205	127.486	210.923
XLOC_000214	XLOC_000214	NUDC	TSS268	chr1:27248212-27273362	134.259	101.736	166.781	134.649	101.952	167.346	108.019	81.8385	134.2	130.969	99.1351	162.804
XLOC_000215	XLOC_000215	TRNP1	TSS269	chr1:27320194-27327377	14.9786	10.6073	19.3498	15.8367	11.3699	20.3035	17.629	12.77	22.4879	26.99	19.781	34.1989
XLOC_000216	XLOC_000216	WDTC1	TSS270	chr1:27561006-27635124	22.7212	17.0999	28.3426	18.309	13.8175	22.8004	26.6181	20.2687	32.9676	19.6181	14.6851	24.5511
XLOC_000217	XLOC_000217	TMEM222	TSS271	chr1:27648635-27662891	14.1417	9.77897	18.5045	14.531	10.1771	18.8849	15.9627	11.2787	20.6466	18.5891	13.0957	24.0825
XLOC_000218	XLOC_000218	LOC644961	TSS272	chr1:27648635-27662891	0.309232	0	0.810765	0.200718	0	0.614865	0.163479	0	0.542764	0.204386	0	0.645567
XLOC_000219	XLOC_000219	SYTL1	TSS273	chr1:27668482-27680423	22.6603	16.4488	28.8719	13.9035	9.76597	18.041	20.4061	14.7107	26.1015	16.8716	11.9866	21.7566
XLOC_000220	XLOC_000220	GPR3	TSS274	chr1:27719147-27722317	0.356914	0.0830206	0.630808	0.99438	0.446986	1.54177	0.197517	0.0126658	0.382368	0.596177	0.196968	0.995386
XLOC_000221	XLOC_000221	FAM76A	TSS275	chr1:28052489-28089423	5.30926	3.61717	7.00134	6.56472	4.55197	8.57748	2.83317	1.7747	3.89164	4.39903	2.92683	5.87124
XLOC_000222	XLOC_000222	STX12	TSS276	chr1:28099693-28150963	28.6448	21.511	35.7786	22.6051	16.77	28.4401	25.5352	19.1567	31.9138	17.7443	13.1096	22.3789
XLOC_000223	XLOC_000223	PPP1R8	TSS277	chr1:28157251-28178183	25.8965	19.1162	32.6767	24.6495	18.1545	31.1445	22.2696	16.3219	28.2172	24.6093	18.145	31.0735
XLOC_000224	XLOC_000224	SCARNA1	TSS278	chr1:28157251-28178183	0	0	0	0	0	0	0	0	0	0	0	0
XLOC_000225	XLOC_000225	THEMIS2	TSS279	chr1:28199054-28213193	19.8161	14.6302	25.0021	28.3433	21.0274	35.6592	29.6443	21.5569	37.7317	21.3073	15.5557	27.0589
XLOC_000226	XLOC_000226	SMPDL3B	TSS280	chr1:28261503-28285663	7.42493	4.67212	10.1777	4.73892	2.80325	6.6746	8.45872	5.48269	11.4348	7.42675	4.73692	10.1166
XLOC_000227	XLOC_000227	XKR8	TSS281	chr1:28286503-28294604	6.30559	4.14371	8.46748	3.54486	2.15805	4.93167	6.37772	4.22824	8.5272	5.75916	3.73162	7.78669
XLOC_000228	XLOC_000228	ATPIF1	TSS282	chr1:28562601-28564616	467.108	348.224	585.991	499.957	370.992	628.922	476.282	357.094	595.471	538.103	399.3	676.905
XLOC_000229	XLOC_000229	SESN2	TSS283	chr1:28585962-28609002	18.7082	13.7837	23.6328	19.9873	14.8492	25.1255	22.4003	16.7218	28.0788	14.4126	10.5331	18.2921
XLOC_000230	XLOC_000230	MED18	TSS284	chr1:28655512-28662478	11.5462	7.96292	15.1295	11.6593	8.04435	15.2742	10.6333	7.2844	13.9822	9.6938	6.6045	12.7831
XLOC_000231	XLOC_000231	PHACTR4	TSS285,TSS286	chr1:28696092-28826881	33.3698	25.2637	41.476	23.9919	18.1692	29.8146	32.4525	24.5932	40.3117	29.0944	21.958	36.2308
XLOC_000232	XLOC_000232	RCC1,SNHG3	TSS287,TSS288	chr1:28832454-28865708	65.5593	49.5981	81.5205	66.9208	50.3337	83.5079	85.9435	65.2863	106.601	88.5687	66.7838	110.354
XLOC_000233	XLOC_000233	TRNAU1AP	TSS289	chr1:28879528-28908366	8.7111	5.23758	12.1846	7.18536	4.37668	9.99403	6.45907	3.79972	9.11841	9.02042	5.09976	12.9411
XLOC_000234	XLOC_000234	RAB42	TSS290,TSS291	chr1:28918711-28921088	2.12169	0.948724	3.29466	0.898393	0.252388	1.5444	2.77748	1.36595	4.18901	3.46098	1.80095	5.12102
XLOC_000235	XLOC_000235	RNU11	TSS292	chr1:28975111-28975246	6.37538	4.81558	7.93518	5.30408	3.74419	6.86397	0	0	0	0	0	0
XLOC_000236	XLOC_000236	GMEB1	TSS293	chr1:28995239-29042115	5.80889	3.89808	7.71969	5.35713	3.57381	7.14044	3.68962	2.3559	5.02335	5.43812	3.64214	7.23409
XLOC_000237	XLOC_000237	YTHDF2	TSS294,TSS295	chr1:29063132-29096287	29.6685	22.1814	37.1556	42.5624	31.9411	53.1838	40.1414	30.2807	50.0021	37.7495	28.2988	47.2001
XLOC_000238	XLOC_000238	OPRD1	TSS296	chr1:29138653-29190208	0.0406604	0	0.160953	0.0813571	0	0.209138	0.059174	0	0.168275	0.0320688	0	0.126545
XLOC_000239	XLOC_000239	EPB41	TSS297,TSS298	chr1:29213602-29450421	15.6476	11.2811	20.0141	16.4086	11.7387	21.0785	21.0819	14.7859	27.3779	15.5337	11.1939	19.8734
XLOC_000240	XLOC_000240	PTPRU	TSS299	chr1:29563027-29653325	3.77321	2.54589	5.00052	5.74129	4.07848	7.4041	7.51974	5.38723	9.65226	6.39904	4.5602	8.23788
XLOC_000241	XLOC_000241	MATN1-AS1	TSS300	chr1:31184123-31199593	0.329841	0.0468302	0.612851	0.363916	0.0837439	0.644088	0.455255	0.12115	0.78936	0.444532	0.106779	0.782286
XLOC_000242	XLOC_000242	ZCCHC17	TSS301	chr1:31769841-31837780	35.3675	25.961	44.774	38.8859	28.6452	49.1266	36.5821	26.9283	46.2358	48.0943	35.7657	60.4228
XLOC_000243	XLOC_000243	SERINC2	TSS302,TSS303,TSS304,TSS305	chr1:31882411-31907527	40.8899	30.4784	51.3015	52.0941	39.0454	65.1429	68.5674	51.7131	85.4217	48.4175	36.0997	60.7353
XLOC_000244	XLOC_000244	LOC149086	TSS306	chr1:31971838-31974167	0	0	0	0	0	0	0	0	0	0	0	0
XLOC_000245	XLOC_000245	LOC284551	TSS307	chr1:31984035-31989846	0	0	0	0.0083173	0	0.0473217	0	0	0	0	0	0
XLOC_000246	XLOC_000246	TINAGL1	TSS308,TSS309	chr1:32042085-32053287	111.346	84.6341	138.058	108.675	81.8241	135.526	148.704	112.74	184.667	153.695	115.52	191.869
XLOC_000247	XLOC_000247	HCRTR1	TSS310	chr1:32083300-32092919	0.0129273	0	0.0698219	0	0	0	0.0125205	0	0.0733256	0	0	0
XLOC_000248	XLOC_000248	KHDRBS1	TSS311	chr1:32479294-32526460	99.7314	75.6496	123.813	112.959	85.7421	140.176	93.8833	70.9988	116.768	99.5128	75.5419	123.484
XLOC_000249	XLOC_000249	TMEM39B	TSS312	chr1:32538502-32568467	14.8178	10.4228	19.2128	6.99082	4.54844	9.43319	16.2973	11.5349	21.0597	15.4895	10.8814	20.0976
XLOC_000250	XLOC_000250	KPNA6	TSS313	chr1:32573643-32642168	19.6533	14.7791	24.5275	19.5237	14.7021	24.3452	23.3097	17.5997	29.0197	17.0251	12.7146	21.3355
XLOC_000251	XLOC_000251	TXLNA	TSS314	chr1:32645344-32663886	26.5939	20.0196	33.1682	26.8873	20.253	33.5215	24.83	18.6775	30.9824	24.3306	18.3226	30.3386
XLOC_000252	XLOC_000252	CCDC28B	TSS315	chr1:32666201-32670991	13.9861	8.65766	19.3146	15.5466	9.79823	21.295	12.9098	7.96207	17.8575	20.6512	13.4401	27.8624
XLOC_000253	XLOC_000253	IQCC	TSS316	chr1:32671235-32674288	3.41614	2.075	4.75728	4.32699	2.77933	5.87465	3.21722	1.94668	4.48775	3.33412	2.01494	4.6533
XLOC_000254	XLOC_000254	DCDC2B	TSS317	chr1:32674694-32681797	0	0	0	0.0773809	0	0.231913	0.0361869	0	0.128765	0.0447417	0	0.172316
XLOC_000255	XLOC_000255	EIF3I	TSS318	chr1:32687970-32697205	253.247	193.166	313.328	269.924	205.492	334.357	216.291	164.813	267.768	278.892	212.222	345.562
XLOC_000256	XLOC_000256	FAM167B	TSS319	chr1:32712817-32714461	0.258504	0	0.626245	0.147964	0	0.385239	0.228232	0	0.562127	0.599738	0	1.23314
XLOC_000257	XLOC_000257	LCK	TSS320,TSS321	chr1:32716839-32751766	1.46242	0.659691	2.26516	0.633208	0.191227	1.07519	1.00106	0.395957	1.60615	1.21792	0.516306	1.91953
XLOC_000258	XLOC_000258	HDAC1	TSS322	chr1:32757707-32799224	112.655	85.3105	139.999	114.641	86.8111	142.471	89.3421	67.5751	111.109	88.5903	66.9191	110.261
XLOC_000259	XLOC_000259	TSSK3	TSS323	chr1:32827861-32829924	0.129447	0	0.319912	0.0380189	0	0.158921	0.0892982	0	0.245547	0.106832	0	0.287547
XLOC_000260	XLOC_000260	ZBTB8B	TSS324	chr1:32930657-32953459	0.637415	0.287379	0.987451	0.475513	0.190032	0.760993	0.427437	0.164857	0.690017	0.152829	0.0229194	0.282739
XLOC_000261	XLOC_000261	ZBTB8A	TSS325	chr1:33004771-33071542	0.953692	0.573536	1.33385	0.58322	0.307705	0.858735	0.945376	0.563873	1.32688	0.697654	0.390518	1.00479
XLOC_000262	XLOC_000262	RBBP4	TSS326,TSS327	chr1:33116748-33168361	19.7343	13.9271	25.5416	25.0163	17.7869	32.2457	15.2103	10.2821	20.1386	14.118	9.99915	18.2369
XLOC_000263	XLOC_000263	KIAA1522	TSS328,TSS329	chr1:33207511-33240571	75.4716	57.4105	93.5327	69.8448	53.2794	86.4102	78.477	59.979	96.9749	63.8092	48.4002	79.2183
XLOC_000264	XLOC_000264	S100PBP	TSS330	chr1:33240839-33324480	7.05561	1.79122	12.32	4.63392	0.125609	9.14223	7.48084	1.69663	13.265	4.34854	0.137714	8.55936
XLOC_000265	XLOC_000265	HPCA	TSS331	chr1:33352097-33366953	0.0688765	0	0.424549	0	0	0	0.0179336	0	0.211982	0.0959291	0	0.465704
XLOC_000266	XLOC_000266	ADC	TSS332	chr1:33546713-33585995	2.23106	1.23376	3.22836	3.95962	2.45396	5.46529	2.04085	1.13722	2.94449	2.55463	1.45814	3.65112
XLOC_000267	XLOC_000267	ZNF362	TSS333	chr1:33722173-33766320	11.3046	8.19942	14.4097	6.43296	4.49576	8.37016	11.8788	8.67374	15.0838	7.06522	4.94935	9.1811
XLOC_000268	XLOC_000268	ZSCAN20	TSS334	chr1:33938231-33961995	1.98211	1.22082	2.74341	1.87537	1.15233	2.59841	2.25828	1.41544	3.10111	1.70086	1.02152	2.38021
XLOC_000269	XLOC_000269	HMGB4	TSS335,TSS336	chr1:33979608-34631443	0	0	0	0	0	0	0	0	0	0	0	0
XLOC_000270	XLOC_000270	LOC402779	TSS337	chr1:33979608-34631443	0	0	0	0	0	0	0	0	0	0	0	0
XLOC_000271	XLOC_000271	C1orf94	TSS338,TSS339	chr1:34632623-34684731	0	0	0	0	0	0	0	0	0	0	0	0
XLOC_000272	XLOC_000272	GJB5	TSS340	chr1:35220647-35224113	0.0342642	0	0.146948	0.0393748	0	0.129051	0.0963399	0	0.260841	0.0240431	0	0.116864
XLOC_000273	XLOC_000273	GJB4	TSS341	chr1:35225341-35229325	0	0	0	0	0	0	0.00716883	0	0.0433895	0	0	0
XLOC_000274	XLOC_000274	GJB3	TSS342,TSS343	chr1:35246789-35251967	8.79313	5.96741	11.6189	2.04633	1.09887	2.9938	8.71287	5.95966	11.4661	5.89497	3.8021	7.98785
XLOC_000275	XLOC_000275	GJA4	TSS344	chr1:35258598-35261348	0.193132	0	0.414579	0.083035	0	0.211506	0.142878	0	0.331106	0.301321	0.00583426	0.596807
XLOC_000276	XLOC_000276	ZMYM1	TSS345	chr1:35544971-35581455	8.3083	6.0182	10.5984	8.09939	5.78018	10.4186	7.62073	5.47555	9.76591	7.68818	5.50071	9.87565
XLOC_000277	XLOC_000277	ZMYM4	TSS346	chr1:35734567-35887545	14.1506	10.5887	17.7126	15.5156	11.6212	19.41	16.4676	12.3583	20.5768	12.7608	9.53671	15.9848
XLOC_000278	XLOC_000278	NCDN	TSS347	chr1:36023392-36032380	19.8181	14.7129	24.9233	21.0598	15.6293	26.4903	22.9008	17.164	28.6375	16.4847	12.0529	20.9166
XLOC_000279	XLOC_000279	TFAP2E	TSS348	chr1:36038970-36060927	0.295219	0.0271929	0.563245	0.220227	0.00483445	0.43562	0.341229	0.0586159	0.623842	0.194776	0	0.39937
XLOC_000280	XLOC_000280	AGO4	TSS349	chr1:36273827-36323490	2.18786	1.47323	2.90249	1.74567	1.14184	2.3495	3.77367	2.67014	4.8772	1.99383	1.33511	2.65255
XLOC_000281	XLOC_000281	AGO1	TSS350	chr1:36348809-36389899	7.93001	5.83258	10.0274	4.09031	2.93886	5.24175	7.77771	5.74814	9.80727	5.94063	4.32503	7.55624
XLOC_000282	XLOC_000282	AGO3	TSS351	chr1:36396682-36522063	5.55618	3.8925	7.21985	5.56358	3.89489	7.23226	5.46319	3.84611	7.08026	6.10651	4.34433	7.86868
XLOC_000283	XLOC_000283	TEKT2	TSS352	chr1:36549675-36553876	0.0665118	0	0.203826	0	0	0	0.0562098	0	0.191146	0.0487523	0	0.165492
XLOC_000284	XLOC_000284	ADPRHL2	TSS353	chr1:36554452-36559533	21.0304	15.115	26.9459	18.3693	13.1488	23.5898	28.1122	20.5624	35.662	24.3474	17.6617	31.0331
XLOC_000285	XLOC_000285	MAP7D1	TSS354	chr1:36621802-36646441	78.3927	59.3551	97.4302	62.3701	47.1222	77.618	74.8652	56.6843	93.046	80.3716	60.8848	99.8584
XLOC_000286	XLOC_000286	THRAP3	TSS355	chr1:36690016-36770957	46.8539	35.7308	57.9771	43.6779	33.3648	53.991	50.302	38.4353	62.1688	39.6429	30.2669	49.0189
XLOC_000287	XLOC_000287	SH3D21	TSS356,TSS357	chr1:36771993-36786948	2.66384	1.56888	3.75881	3.08231	1.84433	4.32028	1.79225	0.936258	2.64825	2.44449	1.38872	3.50025
XLOC_000288	XLOC_000288	MIR4255	TSS358	chr1:37627163-37627235	0	0	0	0	0	0	0	0	0	0	0	0
XLOC_000289	XLOC_000289	ZC3H12A	TSS359	chr1:37940118-37949978	24.7993	18.3381	31.2606	16.3822	11.8187	20.9456	18.9312	13.9474	23.915	29.5351	21.9153	37.155
XLOC_000290	XLOC_000290	DNALI1	TSS360	chr1:38022519-38061586	0.069695	0	0.530849	0.0620046	0	0.518024	0.0318815	0	0.32167	0.0311362	0	0.379811
XLOC_000291	XLOC_000291	CDCA8	TSS361	chr1:38158072-38175391	31.5761	23.4797	39.6724	20.3724	14.9412	25.8035	27.7335	20.5105	34.9564	33.6482	25.0352	42.2612
XLOC_000292	XLOC_000292	MANEAL	TSS362,TSS363	chr1:38259773-38267278	0.52821	0.186193	0.870226	0.197162	0.0178677	0.376455	0.267934	0.0439772	0.491891	0.158485	0	0.322593
XLOC_000293	XLOC_000293	C1orf122	TSS364	chr1:38268613-38275126	79.1069	55.434	102.78	43.1242	29.6169	56.6315	67.2775	47.0511	87.5039	85.8324	59.8664	111.798
XLOC_000294	XLOC_000294	UTP11L	TSS365	chr1:38478383-38490497	45.7316	34.0574	57.4057	51.1897	38.2174	64.162	39.5627	29.3645	49.761	47.2779	35.2691	59.2866
XLOC_000295	XLOC_000295	MIR3659	TSS366	chr1:38554902-38555001	0	0	0	0	0	0	0	0	0	0	0	0
XLOC_000296	XLOC_000296	AKIRIN1	TSS367	chr1:39456915-39471737	23.5881	17.4364	29.7397	69.2187	52.3312	86.1062	60.22	45.5413	74.8986	70.9841	53.5799	88.3883
XLOC_000297	XLOC_000297	NDUFS5	TSS368	chr1:39491966-39500308	676.056	513.98	838.132	775.986	588.322	963.65	713.446	540.451	886.441	773.002	588.037	957.967
XLOC_000298	XLOC_000298	MACF1	TSS369	chr1:39547088-39952810	11.7956	8.62304	14.9681	10.1642	7.3901	12.9382	10.1428	7.38972	12.896	10.2729	7.39412	13.1517
XLOC_000299	XLOC_000299	KIAA0754	TSS370	chr1:39547088-39952810	6.04465	2.46031	9.62899	6.17874	2.72924	9.62825	5.35462	2.13716	8.57207	7.32896	3.40567	11.2522
XLOC_000300	XLOC_000300	BMP8A	TSS371	chr1:39957317-40025370	0.00390345	0	0.0332903	0.0355459	0	0.0840956	0.00382743	0	0.0241328	0.0087284	0	0.0365146
XLOC_000301	XLOC_000301	PPIE	TSS372	chr1:40204516-40254533	24.6042	16.6354	32.5729	27.4196	18.6848	36.1543	24.0017	16.1098	31.8935	26.8852	18.3482	35.4222
XLOC_000302	XLOC_000302	MFSD2A	TSS373	chr1:40420783-40435628	2.97313	1.73874	4.20752	2.13441	1.19673	3.07209	3.02115	1.80136	4.24094	5.81975	3.79836	7.84113
XLOC_000303	XLOC_000303	CAP1	TSS374	chr1:40506254-40538321	197.476	149.75	245.201	173.704	132.405	215.003	219.816	166.686	272.947	245.065	186.082	304.048
XLOC_000304	XLOC_000304	RLF	TSS375	chr1:40627040-40706593	7.77257	5.70712	9.83802	7.94436	5.82199	10.0667	7.14663	5.22641	9.06686	8.09697	5.93628	10.2577
XLOC_000305	XLOC_000305	TMCO2	TSS376	chr1:40713572-40717365	0	0	0	0.0405084	0	0.205553	0.0352939	0	0.20259	0	0	0
XLOC_000306	XLOC_000306	ZMPSTE24	TSS377	chr1:40723721-40759856	38.8926	29.2605	48.5247	21.4759	15.8738	27.0781	38.5816	29.0826	48.0805	34.1234	25.5815	42.6654
XLOC_000307	XLOC_000307	SMAP2	TSS378,TSS379,TSS380,TSS381	chr1:40839377-40888998	14.2963	10.3874	18.2053	15.1597	11.047	19.2725	8.89361	6.26506	11.5222	11.1628	8.04435	14.2812
XLOC_000308	XLOC_000308	ZFP69B	TSS382	chr1:40916336-40929390	2.86939	1.5739	4.16489	3.17279	1.76044	4.58514	2.62978	1.39332	3.86623	1.99664	0.981144	3.01213
XLOC_000309	XLOC_000309	ZFP69	TSS383	chr1:40943301-40962015	0.952576	0.370716	1.53444	0.900752	0.3348	1.4667	1.14954	0.478228	1.82086	0.697684	0.2302	1.16517
XLOC_000310	XLOC_000310	EXO5	TSS384	chr1:40974432-40982214	1.70901	0.892516	2.5255	1.78286	0.957249	2.60847	1.56533	0.77995	2.3507	1.3676	0.665361	2.06984
XLOC_000311	XLOC_000311	ZNF684	TSS385	chr1:40997232-41013841	3.45376	2.05761	4.84992	4.24147	2.60284	5.88011	4.05926	2.46314	5.65537	3.33475	1.95475	4.71474
XLOC_000312	XLOC_000312	NFYC	TSS386,TSS387	chr1:41154751-41237275	35.0727	26.0256	44.1197	35.0752	26.0933	44.0572	31.8462	23.5352	40.1572	27.4336	20.2022	34.665
XLOC_000313	XLOC_000313	MIR30E	TSS388	chr1:41154751-41237275	0	0	0	0	0	0	0	0	0	0	0	0
XLOC_000314	XLOC_000314	MIR30C1	TSS389	chr1:41154751-41237275	0	0	0	0	0	0	0	0	0	0	0	0
XLOC_000315	XLOC_000315	KCNQ4	TSS390	chr1:41249683-41306124	0.522747	0.216562	0.828931	0.734883	0.343252	1.12651	0.612932	0.275125	0.950739	0.608683	0.268341	0.949025
XLOC_000316	XLOC_000316	CTPS1	TSS391	chr1:41445006-41478235	42.4432	32.0291	52.8574	31.0083	23.2438	38.7728	47.1942	35.6149	58.7735	52.8105	39.9802	65.6408
XLOC_000317	XLOC_000317	SLFNL1-AS1	TSS392	chr1:41480261-41707815	0.0533061	0	0.222613	0.0729223	0	0.255966	0.0636109	0	0.248814	0.0577432	0	0.226583
XLOC_000318	XLOC_000318	GUCA2B	TSS393	chr1:42619091-42621495	0.233869	0	0.610646	0.114519	0	0.419401	0	0	0	0.139384	0	0.449832
XLOC_000319	XLOC_000319	RIMKLA	TSS394	chr1:42846467-42889900	0.0804431	0.0210956	0.13979	0.0610737	0.0117495	0.110398	0.064612	0.0130617	0.116162	0.0451741	0.00435595	0.0859922
XLOC_000320	XLOC_000320	PPCS	TSS395	chr1:42922172-42926086	61.7363	45.8002	77.6723	58.1809	43.0465	73.3154	52.1704	38.7513	65.5895	53.7862	39.461	68.1114
XLOC_000321	XLOC_000321	CCDC30	TSS396	chr1:43000559-43120335	0.26882	0.0625698	0.47507	0.27212	0.0493721	0.494867	0.193798	0.0209226	0.366673	0.16372	0.00920431	0.318236
XLOC_000322	XLOC_000322	PPIH	TSS397	chr1:43124047-43142429	65.0312	47.66	82.4024	66.9593	48.8549	85.0636	63.8315	46.5953	81.0678	85.5041	63.6719	107.336
XLOC_000323	XLOC_000323	YBX1	TSS398	chr1:43148065-43168020	1461.03	1070.76	1851.3	1609.18	1183.39	2034.96	1475.41	1082.96	1867.86	1705.76	1248.99	2162.52
XLOC_000324	XLOC_000324	C1orf50	TSS399	chr1:43232915-43241413	11.0623	6.75568	15.3688	8.81245	5.19171	12.4332	9.57738	5.7535	13.4013	8.41128	4.86934	11.9532
XLOC_000325	XLOC_000325	LOC100129924	TSS400	chr1:43253660-43263901	0.0454686	0	0.181245	0.167096	0	0.407352	0.179114	0	0.461165	0.19606	0	0.511935
XLOC_000326	XLOC_000326	ERMAP	TSS401,TSS402	chr1:43272722-43310660	0.348232	0	0.751766	0.418705	0	0.948899	0.328545	0	0.753094	0.206358	0	0.550489
XLOC_000327	XLOC_000327	ZNF691	TSS403	chr1:43312243-43318146	4.18897	2.49408	5.88386	3.23733	1.78432	4.69034	3.41743	1.89675	4.93811	2.96411	1.596	4.33223
XLOC_000328	XLOC_000328	SLC2A1-AS1	TSS404	chr1:43391045-43449029	0.740267	0	3.46338	0.984607	0	3.65524	1.1321	0	4.72334	0.940741	0	4.14
XLOC_000329	XLOC_000329	FAM183A	TSS405	chr1:43613593-43622067	0.210728	0	0.838831	0.113171	0	0.412988	0.10476	0	0.401226	0.0799126	0	0.346997
XLOC_000330	XLOC_000330	WDR65	TSS406	chr1:43629844-43720029	0.13706	0	0.825917	0.141338	0	0.802289	0.0529962	0	0.445865	0.24308	0	1.33823
XLOC_000331	XLOC_000331	TMEM125	TSS407	chr1:43735664-43739673	12.3772	8.51227	16.2422	8.12765	5.36962	10.8857	11.2365	7.77558	14.6973	11.6656	7.99169	15.3394
XLOC_000332	XLOC_000332	TIE1	TSS408	chr1:43766565-43788781	0.173033	0.033505	0.31256	0.14253	0.0204111	0.264648	0.129938	0.0188075	0.241068	0.340417	0.107552	0.573283
XLOC_000333	XLOC_000333	MPL	TSS409	chr1:43803474-43820135	0.211191	0.0432776	0.379105	0.259201	0.0622887	0.456113	0.224726	0.0474222	0.40203	0.176709	0.0204388	0.332979
XLOC_000334	XLOC_000334	CDC20	TSS410	chr1:43824625-43828873	136.08	102.525	169.634	134.638	101.456	167.821	117.605	88.8506	146.359	150.608	113.907	187.309
XLOC_000335	XLOC_000335	SZT2	TSS411	chr1:43855555-43919918	2.17413	1.47811	2.87016	1.96808	1.32733	2.60883	2.19462	1.49261	2.89662	2.35298	1.61212	3.09385
XLOC_000336	XLOC_000336	PTPRF	TSS412	chr1:43996546-44089343	41.1639	31.4039	50.924	38.016	29.0211	47.0109	40.5768	30.9634	50.1902	39.2528	29.8802	48.6253
XLOC_000337	XLOC_000337	KDM4A	TSS413	chr1:44115796-44173012	13.9271	10.269	17.5852	12.3047	9.02624	15.5832	10.4318	7.59903	13.2645	10.279	7.46679	13.0912
XLOC_000338	XLOC_000338	ST3GAL3	TSS414	chr1:44173203-44396837	4.80507	3.05684	6.5533	4.01248	2.47071	5.55425	2.87172	1.61626	4.12717	3.60094	2.16084	5.04105
XLOC_000339	XLOC_000339	ARTN	TSS415	chr1:44398991-44402912	6.68591	4.35707	9.01475	5.27404	3.38226	7.16583	6.11195	3.93623	8.28766	9.30129	6.26278	12.3398
XLOC_000340	XLOC_000340	IPO13	TSS416	chr1:44412477-44433694	10.2675	7.43867	13.0964	9.50309	6.90368	12.1025	10.4311	7.61777	13.2444	10.3433	7.52035	13.1663
XLOC_000341	XLOC_000341	DPH2	TSS417	chr1:44435652-44439043	17.9035	12.9872	22.8198	12.1165	8.66622	15.5667	16.3228	11.8932	20.7524	25.9971	19.2131	32.7811
XLOC_000342	XLOC_000342	ATP6V0B	TSS418	chr1:44440601-44443972	114.329	86.1933	142.466	125.176	94.6954	155.657	101.282	76.607	125.958	72.8504	54.2457	91.4551
XLOC_000343	XLOC_000343	B4GALT2	TSS419,TSS420,TSS421	chr1:44444873-44456843	29.7067	21.977	37.4364	25.9796	19.1727	32.7866	27.8693	20.7579	34.9807	37.7506	28.1688	47.3323
XLOC_000344	XLOC_000344	CCDC24	TSS422	chr1:44457279-44497164	0.63641	0	1.78769	0.658015	0	1.73011	0.755494	0	2.14768	0.613163	0	1.87338
XLOC_000345	XLOC_000345	KLF17	TSS423	chr1:44584521-44600809	0	0	0	0	0	0	0	0	0	0	0	0
XLOC_000346	XLOC_000346	DMAP1	TSS424	chr1:44679124-44686351	22.3447	15.9967	28.6926	22.8403	16.4567	29.2238	13.8707	9.64018	18.1013	15.7258	11.1395	20.3121
XLOC_000347	XLOC_000347	RNF220	TSS425	chr1:44870959-45117396	7.52688	5.25882	9.79493	9.30376	6.64862	11.9589	7.39376	5.15103	9.63648	7.37906	5.14394	9.61418
XLOC_000348	XLOC_000348	MIR5584	TSS426	chr1:44870959-45117396	0	0	0	0	0	0	0	0	0	0	0	0
XLOC_000349	XLOC_000349	C1orf228	TSS427	chr1:45140393-45191263	0.190617	0	0.417739	0.29504	0	0.596091	0.123303	0	0.291279	0.136783	0	0.321817
XLOC_000350	XLOC_000350	KIF2C	TSS428	chr1:45205489-45233438	35.2017	26.3322	44.0713	44.9461	33.7473	56.1449	30.5526	22.8032	38.3019	27.2059	20.2357	34.1761
XLOC_000351	XLOC_000351	RPS8	TSS429	chr1:45241245-45244412	969.073	730.852	1207.29	1027.18	774.907	1279.45	901.826	682.133	1121.52	1185.93	892.977	1478.89
XLOC_000352	XLOC_000352	SNORD55	TSS430	chr1:45241245-45244412	0	0	0	0	0	0	0	0	0	0	0	0
XLOC_000353	XLOC_000353	SNORD46	TSS431	chr1:45241245-45244412	0	0	0	0	0	0	0	0	0	0	0	0
XLOC_000354	XLOC_000354	SNORD38A	TSS432	chr1:45241245-45244412	0	0	0	0	0	0	0	0	0	0	0	0
XLOC_000355	XLOC_000355	SNORD38B	TSS433	chr1:45241245-45244412	0	0	0	0	0	0	0	0	0	0	0	0
XLOC_000356	XLOC_000356	PLK3	TSS434	chr1:45266035-45272957	7.35766	4.97254	9.74279	7.31402	4.92669	9.70135	5.98412	3.93559	8.03265	11.5471	8.08454	15.0096
XLOC_000357	XLOC_000357	BTBD19	TSS435	chr1:45274153-45279801	0.662326	0.156957	1.16769	0.712206	0.168548	1.25586	0.841393	0.248227	1.43456	0.823194	0.22769	1.4187
XLOC_000358	XLOC_000358	UROD	TSS436	chr1:45477804-45481341	42.0457	30.7569	53.3344	51.5633	37.9652	65.1614	52.6298	39.0083	66.2514	52.6737	38.968	66.3795
XLOC_000359	XLOC_000359	LOC400752	TSS437	chr1:45769581-45771291	0	0	0	0	0	0	0	0	0	0	0	0
XLOC_000360	XLOC_000360	HPDL	TSS438	chr1:45792544-45794346	1.38052	0.555602	2.20544	1.18516	0.505262	1.86506	0.774941	0.261517	1.28837	2.91009	1.59925	4.22092
XLOC_000361	XLOC_000361	TOE1	TSS439	chr1:45794913-45956840	5.51917	2.70984	8.32851	5.79519	3.10986	8.48052	5.41287	2.87255	7.9532	5.84196	3.20519	8.47874
XLOC_000362	XLOC_000362	MMACHC	TSS440	chr1:45965855-45988562	8.18592	0	16.9308	8.40294	0	18.8274	7.18991	0	15.9967	6.54514	0	14.6951
XLOC_000363	XLOC_000363	AKR1A1	TSS441	chr1:46016454-46035723	25.2108	17.9994	32.4223	21.3151	15.1251	27.5052	24.7211	17.6848	31.7575	20.036	14.0439	26.0282
XLOC_000364	XLOC_000364	NASP	TSS442	chr1:46049659-46084578	69.7425	52.1532	87.3318	78.7343	59.5777	97.8908	57.0751	42.6474	71.5029	78.0389	58.4842	97.5936
XLOC_000365	XLOC_000365	TMEM69	TSS443	chr1:46153846-46216485	29.488	19.6373	39.3388	26.6004	17.5677	35.6331	26.2284	18.0176	34.4392	24.7471	16.8707	32.6236
XLOC_000366	XLOC_000366	MAST2	TSS444	chr1:46269284-46501796	18.2451	13.6451	22.8451	15.6793	11.6949	19.6637	20.5921	15.45	25.7342	18.9873	14.1935	23.7812
XLOC_000367	XLOC_000367	TSPAN1	TSS445	chr1:46640748-46651634	17.53	12.4941	22.566	15.8649	11.3013	20.4285	21.199	15.3869	27.011	20.4974	14.8779	26.1169
XLOC_000368	XLOC_000368	LURAP1	TSS446	chr1:46654352-46686928	0.814877	0	2.75671	0.785262	0	2.89934	0.664002	0	2.312	0.591802	0	2.40203
XLOC_000369	XLOC_000369	RAD54L	TSS447	chr1:46713366-46769038	10.573	5.77935	15.3667	12.9188	8.1095	17.728	8.69089	5.29464	12.0871	11.0809	5.98946	16.1723
XLOC_000370	XLOC_000370	UQCRH	TSS448	chr1:46769379-46782447	0.59569	0	1.39355	0.616693	0	1.401	0.725572	0	1.62605	0.701342	0	1.5235
XLOC_000371	XLOC_000371	NSUN4	TSS449,TSS450	chr1:46805848-46830824	6.85871	4.92166	8.79576	6.2031	4.41541	7.99079	7.56212	5.46226	9.66197	8.69679	6.29621	11.0974
XLOC_000372	XLOC_000372	FAAH	TSS451	chr1:46859938-46879520	2.97458	1.73235	4.21682	2.99008	1.77369	4.20647	2.95703	1.75049	4.16356	2.34471	1.29859	3.39083
XLOC_000373	XLOC_000373	LOC729041	TSS452	chr1:46899498-46911374	0.293967	0	0.606362	0.086855	0	0.26029	0.382734	0.0154987	0.74997	0.221751	0	0.497843
XLOC_000374	XLOC_000374	DMBX1	TSS453	chr1:46972667-46979886	1.75554	0.991305	2.51978	1.81586	1.03468	2.59703	2.5929	1.56832	3.61747	0.96612	0.452734	1.47951
XLOC_000375	XLOC_000375	MKNK1-AS1	TSS454	chr1:47004367-47069966	0	0	0	0	0	0	0	0	0	0	0	0
XLOC_000376	XLOC_000376	TEX38	TSS455	chr1:47137496-47139256	0	0	0	0	0	0	0	0	0	0.0335933	0	0.172459
XLOC_000377	XLOC_000377	EFCAB14-AS1	TSS456	chr1:47139707-47184736	0.105899	0	1.19504	0	0	0	0.100654	0	1.2488	0	0	0
XLOC_000378	XLOC_000378	CYP4B1	TSS457	chr1:47264669-47285021	0.0987317	0	0.230665	0.166824	0	0.346878	0.176416	0	0.356479	0.168244	0	0.346102
XLOC_000379	XLOC_000379	CYP4X1	TSS458	chr1:47489239-47516423	0.736871	0.283927	1.18981	0.36837	0.077597	0.659143	0.61834	0.212066	1.02461	0.476057	0.124823	0.82729
XLOC_000380	XLOC_000380	CYP4Z1	TSS459	chr1:47533159-47583992	0	0	0	0	0	0	0	0	0	0	0	0
XLOC_000381	XLOC_000381	CYP4A22	TSS460	chr1:47603106-47614526	0	0	0	0	0	0	0	0	0	0	0	0
XLOC_000382	XLOC_000382	LINC00853	TSS461	chr1:47644921-47646011	0.317151	0	0.85693	0.473544	0	1.15261	0.417957	0	1.07156	0.456503	0	1.17133
XLOC_000383	XLOC_000383	CMPK1	TSS462	chr1:47799468-47844511	69.3958	52.5627	86.2288	102.798	77.8473	127.748	88.134	66.7771	109.491	75.2018	56.8928	93.5108
XLOC_000384	XLOC_000384	FOXE3	TSS463	chr1:47881743-47883724	0.0348437	0	0.138732	0.012763	0	0.0698241	0	0	0	0.0551737	0	0.154558
XLOC_000385	XLOC_000385	FOXD2	TSS464	chr1:47901688-47906363	0.157123	0.0265135	0.287732	0.117469	0.0145854	0.220353	0.231883	0.0692057	0.394561	0.212215	0.0554715	0.368958
XLOC_000386	XLOC_000386	SLC5A9	TSS465	chr1:48688356-48714316	0	0	0	0	0	0	0	0	0	0	0	0
XLOC_000387	XLOC_000387	ELAVL4	TSS466,TSS467,TSS468,TSS469	chr1:50513685-50667540	0	0	0	0	0	0	0	0	0	0	0	0
XLOC_000388	XLOC_000388	CDKN2C	TSS470,TSS471	chr1:51434366-51440309	5.41476	3.42949	7.40003	11.2133	7.69061	14.736	6.57695	4.28334	8.87056	6.74143	4.40994	9.07292
XLOC_000389	XLOC_000389	C1orf185	TSS472	chr1:51567905-51613754	0.0262455	0	0.146521	0	0	0	0.0230231	0	0.146041	0	0	0
XLOC_000390	XLOC_000390	RNF11	TSS473	chr1:51701944-51739119	55.1296	41.8326	68.4266	30.7044	22.94	38.4688	59.7168	45.1558	74.2778	43.3401	32.6452	54.035
XLOC_000391	XLOC_000391	OSBPL9	TSS474,TSS475	chr1:52082545-52344609	47.0555	29.0102	65.1009	46.817	26.514	67.12	42.8446	25.5189	60.1703	45.7054	27.376	64.0348
XLOC_000392	XLOC_000392	BTF3L4	TSS476	chr1:52521856-52556388	17.3776	13.0242	21.731	19.9827	14.9806	24.9849	19.2816	14.5148	24.0484	21.7444	16.305	27.1838
XLOC_000393	XLOC_000393	ZFYVE9	TSS477	chr1:52608045-52812358	13.836	10.2571	17.415	14.0066	10.3678	17.6453	9.43502	6.87309	11.997	12.6072	9.29716	15.9172
XLOC_000394	XLOC_000394	PRPF38A	TSS478	chr1:52870218-52883992	12.9899	9.30058	16.6792	19.0525	13.9175	24.1875	13.4225	9.60688	17.2381	17.5794	12.8031	22.3558
XLOC_000395	XLOC_000395	GPX7	TSS479	chr1:53068042-53074723	5.27529	3.04818	7.50239	2.87215	1.44078	4.30353	1.36439	0.50422	2.22457	2.69248	1.31267	4.07229
XLOC_000396	XLOC_000396	FAM159A	TSS480	chr1:53099065-53122737	0.037679	0	0.20207	0.033969	0	0.190194	0	0	0	0.122725	0	0.369584
XLOC_000397	XLOC_000397	ZYG11B	TSS481	chr1:53192130-53293013	7.00683	5.17444	8.83923	9.23153	6.84645	11.6166	8.32571	6.18323	10.4682	6.49041	4.74912	8.23169
XLOC_000398	XLOC_000398	ZYG11A	TSS482	chr1:53308182-53360247	7.77655	5.55155	10.0016	5.2942	3.67494	6.91346	6.19067	4.36626	8.01507	6.46822	4.56943	8.36701
XLOC_000399	XLOC_000399	SCP2	TSS483,TSS484	chr1:53392900-53517289	90.9841	67.3081	114.66	94.9083	70.1926	119.624	98.3476	72.691	124.004	100.198	74.6915	125.705
XLOC_000400	XLOC_000400	PODN	TSS485,TSS486	chr1:53527723-53551174	0.0105526	0	0.089834	0	0	0	0	0	0	0.0161849	0	0.10055
XLOC_000401	XLOC_000401	CPT2	TSS487	chr1:53662100-53686289	11.2435	7.1384	15.3486	8.9271	5.65169	12.2025	8.19493	5.2619	11.128	7.23074	4.17019	10.2913
XLOC_000402	XLOC_000402	LOC100507564	TSS488	chr1:53692563-53793821	0.990633	0	3.94683	1.12335	0	4.22314	0.850423	0	3.47441	0.476799	0	2.85414
XLOC_000403	XLOC_000403	DMRTB1	TSS489	chr1:53925071-53933158	0	0	0	0	0	0	0	0	0	0	0	0
XLOC_000404	XLOC_000404	DIO1	TSS490	chr1:54359860-54376759	0.0327733	0	0.182809	0.0773378	0	0.244383	0.0528023	0	0.197507	0	0	0
XLOC_000405	XLOC_000405	LRRC42	TSS491	chr1:54411998-54433841	40.3067	29.8249	50.7885	37.6435	27.8992	47.3878	32.2916	23.8649	40.7183	41.1561	30.5458	51.7665
XLOC_000406	XLOC_000406	TCEANC2	TSS492	chr1:54519273-54565416	2.62042	1.68539	3.55545	2.52461	1.60986	3.43935	2.78387	1.82486	3.74287	2.23615	1.41177	3.06052
XLOC_000407	XLOC_000407	MIR4781	TSS493	chr1:54519273-54565416	0	0	0	0	0	0	0	0	0	0	0	0
XLOC_000408	XLOC_000408	MRPL37	TSS494	chr1:54665839-54684056	118.933	90.0723	147.793	120.395	90.8278	149.961	109.48	82.5054	136.455	129.322	97.5934	161.05
XLOC_000409	XLOC_000409	ACOT11	TSS495	chr1:55013806-55100417	2.26709	1.20104	3.33315	2.04388	1.07193	3.01583	2.56235	1.42293	3.70178	1.47378	0.671332	2.27624
XLOC_000410	XLOC_000410	HEATR8-TTC4,MROH7,TTC4	TSS496,TSS497	chr1:55107426-55208328	12.7852	9.14043	16.43	13.9722	10.045	17.8995	11.6065	8.24761	14.9653	12.5046	8.98425	16.0249
XLOC_000411	XLOC_000411	C1orf177	TSS498	chr1:55271735-55307937	0.0548036	0	0.182222	0.0455491	0	0.167006	0.0708832	0	0.218992	0.0364235	0	0.160953
XLOC_000412	XLOC_000412	TMEM61	TSS499	chr1:55446464-55457966	0.272984	0	0.593001	0.1908	0	0.458373	0.301902	0	0.625337	0.0268126	0	0.129384
XLOC_000413	XLOC_000413	BSND	TSS500	chr1:55464616-55474465	0.0167613	0	0.0951371	0.0211069	0	0.108914	0	0	0	0	0	0
XLOC_000414	XLOC_000414	PCSK9	TSS501	chr1:55505148-55530526	15.2235	11.0821	19.3648	10.2822	7.42166	13.1426	17.9206	13.286	22.5553	14.0433	10.2898	17.7967
XLOC_000415	XLOC_000415	LOC100507634	TSS502	chr1:55681080-55683128	0.824208	0.338626	1.30979	0.328103	0.0736076	0.582597	0.560642	0.214331	0.906953	0.339868	0.0860812	0.593655
XLOC_000416	XLOC_000416	MIR4422	TSS503	chr1:55691313-55691396	0	0	0	0	0	0	0	0	0	0	0	0
XLOC_000417	XLOC_000417	PRKAA2	TSS504	chr1:57110989-57181008	4.06714	2.99034	5.14393	3.21673	2.30966	4.1238	5.38251	4.01948	6.74554	3.0044	2.1516	3.8572
XLOC_000418	XLOC_000418	C8A	TSS505	chr1:57320442-57383894	0	0	0	0	0	0	0	0	0	0	0	0
XLOC_000419	XLOC_000419	LOC100131060	TSS506	chr1:59250822-59365384	0.123243	0	0.378858	0.295158	0	0.730433	0.0267733	0	0.187603	0.0345857	0	0.200301
XLOC_000420	XLOC_000420	FGGY	TSS507,TSS508	chr1:59762624-60228402	2.99818	1.73195	4.26441	3.25519	1.95173	4.55865	2.41848	1.37335	3.4636	1.98526	1.06553	2.90499
XLOC_000421	XLOC_000421	HOOK1	TSS509	chr1:60280532-60342050	18.1601	13.6902	22.63	28.6955	21.7643	35.6267	15.3772	11.5805	19.174	16.3257	12.225	20.4264
XLOC_000422	XLOC_000422	NFIA	TSS510,TSS511,TSS512	chr1:61542945-61928460	1.6636	1.14924	2.17797	1.99189	1.38057	2.6032	2.20136	1.55208	2.85063	1.85257	1.2782	2.42694
XLOC_000423	XLOC_000423	MGC34796	TSS513	chr1:62119913-62121800	0	0	0	0	0	0	0	0	0	0	0	0
XLOC_000424	XLOC_000424	INADL	TSS514	chr1:62208148-62629591	17.103	12.9112	21.2948	21.9202	16.5872	27.2532	20.709	15.6861	25.732	17.8449	13.4496	22.2401
XLOC_000425	XLOC_000425	L1TD1	TSS515	chr1:62660473-62678001	0	0	0	0	0	0	0	0	0	0	0	0
XLOC_000426	XLOC_000426	USP1	TSS516,TSS517	chr1:62901974-62917475	62.2917	47.2258	77.3576	48.8311	36.9148	60.7474	64.7783	48.9994	80.5572	63.7024	48.1667	79.2381
XLOC_000427	XLOC_000427	ANGPTL3	TSS518	chr1:62920396-63154039	0.0126142	0	0.230231	0.0130099	0	0.226881	0.0100283	0	0.186246	0.0130344	0	0.218644
XLOC_000428	XLOC_000428	ATG4C	TSS519	chr1:63249776-63330941	6.71625	4.65639	8.77611	10.9838	7.84723	14.1204	9.62518	6.87416	12.3762	9.3875	6.68179	12.0932
XLOC_000429	XLOC_000429	FOXD3	TSS520	chr1:63788729-63790797	0.543077	0.128069	0.958085	0.598313	0.173459	1.02317	0.511788	0.124125	0.899451	0.259736	0	0.526082
XLOC_000430	XLOC_000430	ALG6	TSS521	chr1:63833260-63904233	7.59048	5.37836	9.80261	10.2458	7.36257	13.129	7.58919	5.38371	9.79467	7.04786	4.95407	9.14166
XLOC_000431	XLOC_000431	EFCAB7	TSS522	chr1:63989012-64038364	7.38502	5.05343	9.71661	9.58841	6.68231	12.4945	6.02192	4.05073	7.99311	5.32302	3.47684	7.16919
XLOC_000432	XLOC_000432	DLEU2L	TSS523	chr1:63989012-64038364	0.0557221	0	0.316538	0.079874	0	0.412833	0.114891	0	0.416377	0.0247252	0	0.173595
XLOC_000433	XLOC_000433	PGM1	TSS524,TSS525,TSS526	chr1:64058946-64125916	79.1712	59.8331	98.5093	60.4001	45.447	75.3532	63.1849	47.5563	78.8135	85.8427	64.8674	106.818
XLOC_000434	XLOC_000434	ROR1	TSS527	chr1:64239689-64647179	0.492864	0.216164	0.769565	1.28761	0.772998	1.80222	1.20215	0.726593	1.67771	1.23413	0.739408	1.72886
XLOC_000435	XLOC_000435	UBE2U	TSS528	chr1:64669489-64710027	0	0	0	0.0269425	0	0.13508	0.0263109	0	0.141634	0	0	0
XLOC_000436	XLOC_000436	CACHD1	TSS529	chr1:64936475-65158741	3.93099	2.72736	5.13461	3.87963	2.68467	5.07458	3.14912	2.14314	4.15509	2.06717	1.341	2.79334
XLOC_000437	XLOC_000437	MIR4794	TSS530	chr1:64936475-65158741	0	0	0	0	0	0	0	0	0	0	0	0
XLOC_000438	XLOC_000438	RAVER2	TSS531	chr1:65210777-65432187	12.764	4.2766	21.2514	7.30693	0.620323	13.9935	12.2388	5.35763	19.1199	9.8627	3.43516	16.2902
XLOC_000439	XLOC_000439	AK4	TSS532,TSS533,TSS534	chr1:65613231-65697828	9.15738	6.76618	11.5486	7.36266	5.39375	9.33157	12.9902	9.70131	16.2791	14.0728	10.5005	17.6451
XLOC_000440	XLOC_000440	DNAJC6	TSS535,TSS536	chr1:65730376-65881552	6.04325	4.34116	7.74534	6.56557	4.76115	8.36999	5.79294	4.15224	7.43363	3.06905	2.10282	4.03529
XLOC_000441	XLOC_000441	LEPR,LEPROT	TSS537,TSS538,TSS539	chr1:65886130-66103176	54.5073	39.8454	69.1693	33.5583	24.3426	42.774	58.9624	43.793	74.1317	51.8774	37.8935	65.8612
XLOC_000442	XLOC_000442	PDE4B	TSS540,TSS541,TSS542,TSS543	chr1:66258192-66840262	0.547871	0.232413	0.86333	0.468357	0.184097	0.752617	0.579979	0.248918	0.911039	0.62277	0.275344	0.970196
XLOC_000443	XLOC_000443	SGIP1	TSS544	chr1:66999824-67210768	6.23384	4.42945	8.03823	6.19142	4.37086	8.01199	7.03491	5.03776	9.03205	5.98905	4.18316	7.79495
XLOC_000444	XLOC_000444	MIR3117	TSS545	chr1:66999824-67210768	0	0	0	0	0	0	0	0	0	0	0	0
XLOC_000445	XLOC_000445	TCTEX1D1	TSS546	chr1:67218139-67244730	0	0	0	0	0	0	0	0	0	0	0	0
XLOC_000446	XLOC_000446	MIER1	TSS547,TSS548	chr1:67390577-67454302	23.9094	17.9708	29.8479	33.2778	25.0754	41.4802	28.8692	21.7638	35.9745	23.3644	17.4185	29.3104
XLOC_000447	XLOC_000447	IL23R	TSS549	chr1:67632168-67725650	0	0	0	0	0	0	0.0173441	0	0.073987	0	0	0
XLOC_000448	XLOC_000448	IL12RB2	TSS550	chr1:67773046-67862583	0.862679	0.429939	1.29542	0.505917	0.205975	0.805859	0.793784	0.385146	1.20242	0.596075	0.265789	0.926361
XLOC_000449	XLOC_000449	GADD45A	TSS551	chr1:68150859-68154021	56.5954	41.5159	71.6748	38.1911	27.8799	48.5024	52.6038	38.9012	66.3065	72.0606	53.8275	90.2937
XLOC_000450	XLOC_000450	GNG12-AS1	TSS552	chr1:68167148-68698284	0.0112553	0	0.47277	0	0	0	0	0	0	0.0124845	0	0.532061
XLOC_000451	XLOC_000451	LRRC7	TSS553	chr1:70225857-70589171	0.847516	0.469128	1.2259	0.948025	0.517964	1.37809	0.702926	0.367637	1.03822	0.829353	0.444169	1.21454
XLOC_000452	XLOC_000452	PIN1P1	TSS554	chr1:70225857-70589171	0	0	0	0	0	0	0	0	0	0.0379115	0	0.22746
XLOC_000453	XLOC_000453	SRSF11	TSS555	chr1:70671364-70717701	62.954	47.52	78.3881	55.4637	41.9343	68.993	55.8026	42.2414	69.3638	62.7112	47.5434	77.8789
XLOC_000454	XLOC_000454	HHLA3	TSS556	chr1:70820492-70833705	38.4955	26.8831	50.1078	51.2784	36.2802	66.2765	37.7445	26.3413	49.1477	30.0324	20.535	39.5299
XLOC_000455	XLOC_000455	CTH	TSS557	chr1:70876900-70905534	6.82042	4.58279	9.05805	6.67539	4.47359	8.87719	7.12844	4.81815	9.43873	9.91705	6.92899	12.9051
XLOC_000456	XLOC_000456	ZRANB2-AS1	TSS558	chr1:71318035-71546972	0	0	0	0	0	0	0	0	0	0	0	0
XLOC_000457	XLOC_000457	ZRANB2-AS2	TSS559	chr1:71547006-71703406	0.583986	0.0391999	1.12877	1.02351	0.237212	1.8098	0.587887	0.0348774	1.1409	0.0958685	0	0.270087
XLOC_000458	XLOC_000458	FPGT,FPGT-TNNI3K,TNNI3K	TSS560,TSS561	chr1:74663895-75010116	3.65756	2.50016	4.81496	5.36138	3.7513	6.97147	4.47469	3.12607	5.82331	3.12547	2.10019	4.15074
XLOC_000459	XLOC_000459	TYW3	TSS562	chr1:75171171-75232360	8.77018	4.72135	12.819	12.7908	7.20486	18.3767	12.3911	7.04796	17.7343	14.328	8.3157	20.3403
XLOC_000460	XLOC_000460	LHX8	TSS563,TSS564	chr1:75594118-75627218	0	0	0	0	0	0	0	0	0	0	0	0
XLOC_000461	XLOC_000461	ACADM	TSS565	chr1:76190042-76229355	30.0891	22.4597	37.7185	17.2201	12.6151	21.8251	34.7873	26.1913	43.3834	17.5088	12.8052	22.2125
XLOC_000462	XLOC_000462	RABGGTB	TSS566	chr1:76251878-76260775	44.2058	32.6889	55.7226	43.7911	32.2706	55.3116	41.3928	30.5805	52.2052	58.1842	43.1313	73.2371
XLOC_000463	XLOC_000463	SNORD45C	TSS567	chr1:76251878-76260775	0	0	0	0	0	0	0	0	0	0	0	0
XLOC_000464	XLOC_000464	SNORD45A	TSS568	chr1:76251878-76260775	0	0	0	0	0	0	0	0	0	0	0	0
XLOC_000465	XLOC_000465	SNORD45B	TSS569	chr1:76251878-76260775	0	0	0	0	0	0	0	0	0	0	0	0
XLOC_000466	XLOC_000466	MSH4	TSS570	chr1:76262555-76378923	0.0216648	0	0.0651948	0.0165552	0	0.0667661	0.021154	0	0.0680945	0.00865238	0	0.0423806
XLOC_000467	XLOC_000467	ST6GALNAC3	TSS571	chr1:76540388-77096669	0.68084	0.284868	1.07681	0.348677	0.0959453	0.601409	0.469339	0.151709	0.786969	0.771496	0.352482	1.19051
XLOC_000468	XLOC_000468	ST6GALNAC5	TSS572	chr1:77333185-77529737	0.0303705	0	0.120789	0.0260776	0	0.106515	0.0151617	0	0.0768013	0.0180312	0	0.0792295
XLOC_000469	XLOC_000469	AK5	TSS573,TSS574	chr1:77747661-78025654	1.53821	0.859001	2.21743	3.13981	1.99748	4.28214	2.01964	1.19438	2.84489	2.36237	1.43372	3.29103
XLOC_000470	XLOC_000470	FAM73A	TSS575	chr1:78245308-78345225	4.06337	2.92067	5.20606	10.8207	8.06589	13.5755	18.1381	13.736	22.5401	12.1913	9.09008	15.2925
XLOC_000471	XLOC_000471	NEXN	TSS576	chr1:78354199-78409578	26.5237	19.9068	33.1406	24.7431	18.4156	31.0707	43.7985	32.8788	54.7181	23.4432	17.3095	29.5769
XLOC_000472	XLOC_000472	DNAJB4	TSS577	chr1:78470635-78482995	17.7277	12.8339	22.6215	14.8543	10.5356	19.173	25.0564	18.4933	31.6195	20.6241	15.0263	26.2219
XLOC_000473	XLOC_000473	GIPC2	TSS578	chr1:78511588-78603112	0.00867009	0	0.0445126	0.016707	0	0.0553923	0.0408775	0	0.118581	0.00896523	0	0.0459308
XLOC_000474	XLOC_000474	MGC27382	TSS579	chr1:78695282-78835147	0	0	0	0	0	0	0	0	0	0	0	0
XLOC_000475	XLOC_000475	PTGFR	TSS580	chr1:78956727-79006386	0	0	0	0	0	0	0.00323189	0	0.0300437	0	0	0
XLOC_000476	XLOC_000476	IFI44L	TSS581	chr1:79086087-79111830	0.792268	0.46275	1.12179	1.06609	0.64176	1.49042	5.51397	4.02255	7.00539	0.606533	0.324167	0.888899
XLOC_000477	XLOC_000477	IFI44	TSS582	chr1:79115476-79129763	4.24408	2.51886	5.96929	4.68305	2.75143	6.61468	20.8319	14.941	26.7227	4.00347	2.29963	5.70731
XLOC_000478	XLOC_000478	LPHN2	TSS583	chr1:82266081-82458107	52.6086	39.9049	65.3124	38.8472	29.3902	48.3043	36.7532	27.8079	45.6984	39.1243	29.5918	48.6568
XLOC_000479	XLOC_000479	PRKACB	TSS584,TSS585,TSS586,TSS587,TSS588	chr1:84543744-84704181	2.6495	1.70466	3.59433	2.42579	1.49466	3.35692	1.71125	1.01377	2.40874	2.2794	1.44628	3.11253
XLOC_000480	XLOC_000480	SAMD13	TSS589,TSS590,TSS591	chr1:84764048-84816481	0.0630328	0	0.225544	0.0912757	0	0.289276	0.209096	0	0.499575	0.0424684	0	0.204004
XLOC_000481	XLOC_000481	DNASE2B	TSS592,TSS593	chr1:84864214-84880691	0	0	0	0	0	0	0	0	0	0	0	0
XLOC_000482	XLOC_000482	RPF1	TSS594	chr1:84944919-84972262	37.2174	19.6299	54.805	26.2431	8.16404	44.3221	33.7201	13.6672	53.773	28.3355	9.86846	46.8025
XLOC_000483	XLOC_000483	WDR63	TSS595	chr1:85527992-85598821	0.599818	0.248175	0.95146	0.660214	0.271491	1.04894	0.250344	0.0563682	0.44432	0.176079	0.0164468	0.335712
XLOC_000484	XLOC_000484	MIR4423	TSS596	chr1:85599476-85599556	0	0	0	0	0	0	0	0	0	0	0	0
XLOC_000485	XLOC_000485	LOC646626	TSS597	chr1:85731459-85743771	0.321538	0	1.30656	0.281352	0	1.1744	0.179747	0	0.918229	0.225417	0	1.06487
XLOC_000486	XLOC_000486	CYR61	TSS598	chr1:86046443-86049648	566.74	423.218	710.261	296.196	217.877	374.516	671.572	498.022	845.122	788.022	579.316	996.729
XLOC_000487	XLOC_000487	CLCA2	TSS599	chr1:86889768-86922240	0.00593912	0	0.0331625	0.0174751	0	0.0549887	0.0117409	0	0.050731	0.0103317	0	0.046003
XLOC_000488	XLOC_000488	CLCA1	TSS600	chr1:86934525-86965974	0	0	0	0	0	0	0	0	0	0	0	0
XLOC_000489	XLOC_000489	CLCA4	TSS601	chr1:87012758-87046432	0	0	0	0	0	0	0	0	0	0	0	0
XLOC_000490	XLOC_000490	CLCA3P	TSS602	chr1:87099958-87121059	0	0	0	0.027347	0	0.0845311	0	0	0	0.00838215	0	0.0409135
XLOC_000491	XLOC_000491	SH3GLB1	TSS603	chr1:87170252-87213867	25.9786	19.5958	32.3614	23.6058	17.7474	29.4643	31.1452	23.6153	38.6752	18.0891	13.5754	22.6028
XLOC_000492	XLOC_000492	HS2ST1	TSS604	chr1:87380334-87575681	12.4743	8.72859	16.22	16.2922	11.419	21.1653	16.5578	11.6283	21.4873	14.3352	9.16962	19.5007
XLOC_000493	XLOC_000493	LOC339524	TSS605,TSS606	chr1:87595447-87634886	0.115662	0	0.29677	0.200784	0	0.457362	0.214157	0	0.462274	0.299928	0	0.604996
XLOC_000494	XLOC_000494	LMO4	TSS607	chr1:87794150-87814607	26.2926	19.9673	32.6179	16.9353	12.7172	21.1534	19.5372	14.7431	24.3313	26.5261	20.0006	33.0517
XLOC_000495	XLOC_000495	PKN2	TSS608	chr1:89149921-89301938	19.344	14.6228	24.0653	30.1353	22.832	37.4386	29.7074	22.6492	36.7656	23.4353	17.7033	29.1673
XLOC_000496	XLOC_000496	GBP6	TSS609	chr1:89829435-89853719	0.0926099	0.00115463	0.184065	0.056744	0	0.129084	0.180505	0.0409711	0.32004	0.0608008	0	0.13141
XLOC_000497	XLOC_000497	GBP1P1	TSS610	chr1:89873237-89890493	0.0907764	0	0.256243	0.0634981	0	0.201589	0.74304	0.167994	1.31809	0.0936828	0	0.266269
XLOC_000498	XLOC_000498	LRRC8B	TSS611,TSS612	chr1:89990396-90063420	1.25745	0.811566	1.70333	0.988246	0.605878	1.37061	1.51739	0.997757	2.03702	0.86182	0.513335	1.21031
XLOC_000499	XLOC_000499	LRRC8C	TSS613	chr1:90098643-90185094	1.35509	0.862688	1.84749	0.836727	0.477919	1.19554	1.43211	0.918711	1.94551	0.801896	0.465013	1.13878
XLOC_000500	XLOC_000500	LRRC8D	TSS614,TSS615	chr1:90286572-90401989	31.1502	23.5806	38.7198	24.7944	18.5982	30.9905	16.9134	12.5739	21.2528	33.649	25.3674	41.9305
XLOC_000501	XLOC_000501	ZNF326	TSS616	chr1:90460677-90494094	18.1336	13.3547	22.9125	16.9447	12.2779	21.6115	18.7184	13.7484	23.6884	18.6213	13.636	23.6066
XLOC_000502	XLOC_000502	CDC7	TSS617,TSS618	chr1:91966403-91991321	21.0506	15.6453	26.4558	26.9779	20.1987	33.7572	18.529	13.7099	23.3481	20.3425	15.0746	25.6104
XLOC_000503	XLOC_000503	BRDT	TSS619,TSS620	chr1:92414927-92479985	0.0297653	0	0.147256	0.0206426	0	0.144029	0.0473259	0	0.179378	0.0314522	0	0.149888
XLOC_000504	XLOC_000504	EPHX4	TSS621	chr1:92495532-92529093	2.3884	1.17078	3.60602	5.26724	3.16221	7.37226	4.9197	2.93169	6.90772	2.78465	1.43914	4.13015
XLOC_000505	XLOC_000505	BTBD8	TSS622	chr1:92545861-92613401	0.533463	0.118248	0.948678	0.557626	0.139633	0.975619	0.545607	0.14752	0.943695	0.0909476	0	0.236301
XLOC_000506	XLOC_000506	KIAA1107	TSS623	chr1:92632608-92650280	0.894461	0.458828	1.3301	1.54071	0.888735	2.19269	0.925955	0.475086	1.37682	0.351761	0.12859	0.574932
XLOC_000507	XLOC_000507	C1orf146	TSS624	chr1:92683572-92711367	0	0	0	0	0	0	0.0415486	0	0.209228	0.0468323	0	0.209511
XLOC_000508	XLOC_000508	RPAP2	TSS625	chr1:92711954-92853732	10.3581	6.74414	13.972	11.1028	7.19738	15.0082	12.6047	8.38956	16.8198	7.4286	4.26442	10.5928
XLOC_000509	XLOC_000509	RPL5	TSS626	chr1:93297593-93427079	1263.04	938.374	1587.7	1468.01	1097.22	1838.79	1214.59	903.612	1525.56	1690.27	1253.48	2127.06
XLOC_000510	XLOC_000510	SNORD21	TSS627	chr1:93297593-93427079	0	0	0	218.013	169.086	266.941	125.798	91.6526	159.944	0	0	0
XLOC_000511	XLOC_000511	SNORA66	TSS628	chr1:93297593-93427079	0	0	0	0	0	0	0	0	0	0	0	0
XLOC_000512	XLOC_000512	MTF2	TSS629	chr1:93544791-93604638	19.3407	14.5127	24.1687	16.2209	12.0152	20.4266	20.2544	15.2957	25.2131	13.7466	10.1632	17.33
XLOC_000513	XLOC_000513	CCDC18	TSS630	chr1:93646280-93744287	9.75155	7.07302	12.4301	8.51663	6.09251	10.9408	8.86292	6.37965	11.3462	9.23232	6.65775	11.8069
XLOC_000514	XLOC_000514	DR1	TSS631	chr1:93811477-93828148	53.1321	40.1397	66.1246	47.1679	35.5237	58.8121	58.9371	44.6656	73.2085	55.5743	41.9591	69.1894
XLOC_000515	XLOC_000515	FNBP1L	TSS632	chr1:93913687-94020218	46.1319	34.9838	57.2799	45.0248	34.0153	56.0344	35.2473	26.66	43.8347	26.9025	20.149	33.656
XLOC_000516	XLOC_000516	LOC100129046	TSS633	chr1:94027342-94312706	0.803044	0	2.21337	0.979668	0	2.60159	1.05668	0	3.02299	1.08156	0	2.88162
XLOC_000517	XLOC_000517	MIR760	TSS634	chr1:94027342-94312706	0	0	0	0	0	0	0	0	0	0	0	0
XLOC_000518	XLOC_000518	ABCD3	TSS635	chr1:94883932-94984219	30.9364	21.6006	40.2722	44.7595	33.0403	56.4788	46.8873	34.4074	59.3671	51.5056	35.2153	67.7959
XLOC_000519	XLOC_000519	SLC44A3	TSS636,TSS637	chr1:95285897-95360803	4.58849	3.03099	6.14599	3.68685	2.35246	5.02124	5.41909	3.66562	7.17255	4.10968	2.69464	5.52472
XLOC_000520	XLOC_000520	LOC729970	TSS638	chr1:95393583-95428826	2.60563	1.17604	4.03522	1.79291	0.70247	2.88335	2.57148	1.16082	3.98215	1.52021	0.537809	2.5026
XLOC_000521	XLOC_000521	RWDD3,TMEM56,TMEM56-RWDD3	TSS639,TSS640,TSS641,TSS642	chr1:95558072-95712781	3.49429	1.85889	5.12969	2.9154	1.53691	4.29389	4.69822	2.69442	6.70202	5.02641	2.94694	7.10588
XLOC_000522	XLOC_000522	FLJ31662	TSS643	chr1:95940292-95944912	0	0	0	0	0	0	0	0	0	0	0	0
XLOC_000523	XLOC_000523	PTBP2	TSS644	chr1:97187174-97280605	5.08923	3.49141	6.68706	7.923	5.6061	10.2399	4.02696	2.69116	5.36277	8.20984	5.86927	10.5504
XLOC_000524	XLOC_000524	DPYD-AS1	TSS645	chr1:97543299-98386615	0.166028	0	1.3095	0.0851708	0	0.466144	0	0	0	0.0782267	0	0.445825
XLOC_000525	XLOC_000525	LOC729987	TSS646	chr1:98676266-98738214	0.010165	0	0.0576344	0.0109761	0	0.0604785	0	0	0	0	0	0
XLOC_000526	XLOC_000526	SNX7	TSS647	chr1:99127235-99226056	32.4738	23.6781	41.2694	23.8519	17.0553	30.6485	31.8215	23.2324	40.4105	29.1128	21.1102	37.1154
XLOC_000527	XLOC_000527	LOC100129620	TSS648	chr1:99355800-99614408	0	0	0	0	0	0	0	0	0	0	0	0
XLOC_000528	XLOC_000528	LPPR4	TSS649	chr1:99729847-99775138	0.0147799	0	0.0542646	0.0146681	0	0.0529942	0.018162	0	0.0613101	0.0207478	0	0.0637937
XLOC_000529	XLOC_000529	MIR548AA1,PALMD	TSS650,TSS651	chr1:100111430-100231349	8.68266	4.60719	12.7581	8.44406	4.48819	12.3999	8.16095	4.19829	12.1236	6.63908	2.94106	10.3371
XLOC_000530	XLOC_000530	AGL	TSS652,TSS653,TSS654,TSS655	chr1:100315639-100389579	4.85602	3.55012	6.16191	5.31546	3.87365	6.75727	5.73103	4.21379	7.24827	2.84416	1.98971	3.69861
XLOC_000531	XLOC_000531	SLC35A3	TSS656,TSS657	chr1:100435344-100492534	4.37546	3.11805	5.63287	3.20244	2.2265	4.17839	5.11615	3.70407	6.52824	2.84979	1.94544	3.75414
XLOC_000532	XLOC_000532	HIAT1	TSS658	chr1:100503788-100548929	6.65265	4.611	8.69429	6.15002	4.19958	8.10046	6.03979	4.14903	7.93056	5.7443	3.91446	7.57415
XLOC_000533	XLOC_000533	TRMT13	TSS659	chr1:100598705-100643829	1.76998	1.02814	2.51183	1.49984	0.810177	2.1895	2.02615	1.19007	2.86223	1.58531	0.880634	2.28999
XLOC_000534	XLOC_000534	RTCA	TSS660	chr1:100731713-100758325	17.1015	12.4627	21.7404	13.4419	9.6341	17.2496	14.464	10.4531	18.4749	14.4	10.4461	18.354
XLOC_000535	XLOC_000535	MIR553	TSS661	chr1:100731713-100758325	0	0	0	0	0	0	0	0	0	0	0	0
XLOC_000536	XLOC_000536	CDC14A	TSS662	chr1:100818022-100985833	1.28328	0.736683	1.82988	1.66534	0.992736	2.33795	1.45127	0.860321	2.04222	1.48286	0.852486	2.11323
XLOC_000537	XLOC_000537	GPR88	TSS663	chr1:101003727-101007583	0	0	0	0	0	0	0	0	0	0	0	0
XLOC_000538	XLOC_000538	VCAM1	TSS664	chr1:101185195-101204601	0	0	0	0	0	0	0	0	0	0	0	0
XLOC_000539	XLOC_000539	SLC30A7	TSS665	chr1:101361631-101447311	3.10108	2.21717	3.98499	3.0406	2.1389	3.9423	4.31006	3.14674	5.47338	3.8344	2.73323	4.93556
XLOC_000540	XLOC_000540	S1PR1	TSS666	chr1:101702304-101707076	0.197633	0.0318845	0.363381	0.33304	0.0837466	0.582333	0.367489	0.103988	0.630989	0.25286	0.0526052	0.453115
XLOC_000541	XLOC_000541	DNAJA1P5	TSS667	chr1:102268126-102462790	0	0	0	0	0	0	0	0	0	0	0	0
XLOC_000542	XLOC_000542	AMY2B,RNPC3	TSS668,TSS669	chr1:104068577-104122149	4.66428	2.8848	6.44376	6.79114	4.46479	9.11749	5.24596	3.33454	7.15739	4.64559	2.90172	6.38947
XLOC_000543	XLOC_000543	ACTG1P4	TSS670	chr1:104068577-104122149	0	0	0	0	0	0	0	0	0	0	0	0
XLOC_000544	XLOC_000544	AMY2A	TSS671	chr1:104159998-104168400	0	0	0	0	0	0	0	0	0	0	0	0
XLOC_000545	XLOC_000545	AMY1A	TSS672,TSS673	chr1:104198140-104207173	0	0	0	0	0	0	0	0	0	0	0	0
XLOC_000546	XLOC_000546	AMY1A	TSS674,TSS675	chr1:104292278-104301311	0	0	0	0	0	0	0	0	0	0	0	0
XLOC_000547	XLOC_000547	LOC100129138	TSS676	chr1:104615644-104619693	0	0	0	0	0	0	0	0	0	0	0	0
XLOC_000548	XLOC_000548	PRMT6	TSS677	chr1:107599266-107601916	7.97685	5.51177	10.4419	2.49185	1.4725	3.5112	9.96597	7.05084	12.8811	7.39708	5.11341	9.68075
XLOC_000549	XLOC_000549	NTNG1	TSS678,TSS679	chr1:107682628-108024475	0.15606	0	0.312214	0.305778	0.0423919	0.569165	0.291521	0.0657206	0.517322	0.145073	0.00049635	0.28965
XLOC_000550	XLOC_000550	VAV3-AS1	TSS680	chr1:108113781-108537229	0	0	0	0	0	0	0	0	0	0	0	0
XLOC_000551	XLOC_000551	NBPF6	TSS681	chr1:108992903-109013260	0	0	0	0	0	0	0	0	0	0	0	0
XLOC_000552	XLOC_000552	FAM102B	TSS682	chr1:109102970-109181949	0.16539	0.0474695	0.283311	0.18753	0.0531601	0.321899	0.582886	0.298861	0.866911	0.254613	0.0919223	0.417304
XLOC_000553	XLOC_000553	PRPF38B	TSS683	chr1:109234931-109244422	17.66	13.0747	22.2452	15.7974	11.6494	19.9453	14.4252	10.5945	18.2558	16.4056	12.2001	20.6112
XLOC_000554	XLOC_000554	FNDC7	TSS684	chr1:109255555-109285367	0.00977718	0	0.0464065	0	0	0	0	0	0	0	0	0
XLOC_000555	XLOC_000555	STXBP3	TSS685	chr1:109289284-109352148	7.89349	5.56362	10.2234	10.908	7.80854	14.0074	10.9348	7.87154	13.9981	9.06526	6.42052	11.71
XLOC_000556	XLOC_000556	SRG7	TSS686	chr1:109358519-109401146	0	0	0	0	0	0	0	0	0	0	0	0
XLOC_000557	XLOC_000557	GPSM2	TSS687	chr1:109419602-109506111	15.3078	9.56012	21.0555	21.3767	13.0897	29.6637	13.6801	8.3993	18.961	13.7159	8.67284	18.759
XLOC_000558	XLOC_000558	TMEM167B	TSS688	chr1:109633402-109639554	14.2451	10.3928	18.0975	9.77347	6.96726	12.5797	11.4962	8.28765	14.7047	13.1589	9.57468	16.7432
XLOC_000559	XLOC_000559	SCARNA2	TSS689	chr1:109642814-109643234	0.198787	0	0.55669	0.156123	0	0.487729	0.0672784	0	0.3545	0.0330375	0	0.223984
XLOC_000560	XLOC_000560	KIAA1324	TSS690,TSS691,TSS692	chr1:109656584-109749403	0.0239933	0	0.0757905	0.00437235	0	0.0499865	0.0221436	0	0.0750584	0.0129875	0	0.0580789
XLOC_000561	XLOC_000561	SARS	TSS693	chr1:109756514-109780804	110.787	83.6141	137.961	93.2168	70.2349	116.199	124.65	94.1718	155.128	125.477	94.9014	156.053
XLOC_000562	XLOC_000562	CELSR2	TSS694	chr1:109792640-109818378	8.26073	6.17949	10.342	10.2972	7.74294	12.8514	8.51124	6.38321	10.6393	8.78568	6.5626	11.0088
XLOC_000563	XLOC_000563	SYPL2	TSS695	chr1:110009099-110024764	0	0	0	0.0141997	0	0.0577063	0.0104188	0	0.0482333	0.0143012	0	0.0565418
XLOC_000564	XLOC_000564	ATXN7L2	TSS696	chr1:110026560-110035420	1.13981	0.511634	1.768	0.873713	0.361144	1.38628	0.988385	0.422052	1.55472	1.03027	0.437974	1.62256
XLOC_000565	XLOC_000565	CYB561D1	TSS697	chr1:110036657-110043063	1.28105	0.7624	1.79971	0.893178	0.493627	1.29273	2.263	1.46935	3.05665	0.804476	0.430381	1.17857
XLOC_000566	XLOC_000566	GPR61	TSS698	chr1:110082493-110088455	0	0	0	0.0146505	0	0.0655576	0	0	0	0	0	0
XLOC_000567	XLOC_000567	GNAI3	TSS699	chr1:110091185-110138454	26.1645	19.6515	32.6775	31.1391	23.4098	38.8684	22.0715	16.549	27.594	23.2689	17.4231	29.1148
XLOC_000568	XLOC_000568	MIR197	TSS700	chr1:110141514-110141589	0	0	0	0	0	0	0	0	0	0	0	0
XLOC_000569	XLOC_000569	AMPD2	TSS701,TSS702,TSS703,TSS704	chr1:110162434-110174677	8.78694	6.30693	11.2669	6.51935	4.58865	8.45006	6.67542	4.73075	8.62009	12.7577	9.30812	16.2073
XLOC_000570	XLOC_000570	GSTM4	TSS705	chr1:110198697-110208123	12.7716	8.72717	16.8161	14.264	9.79926	18.7287	16.2419	11.3523	21.1314	15.7556	10.9641	20.5471
XLOC_000571	XLOC_000571	GSTM2	TSS706	chr1:110210643-110226619	1.92909	0.817068	3.04111	2.51734	1.17698	3.85769	2.57324	1.20401	3.94246	2.12033	0.901536	3.33912
XLOC_000572	XLOC_000572	GSTM1	TSS707	chr1:110230417-110236367	0.247157	0	0.538984	0.191688	0	0.446955	0.291651	0	0.606346	0.206467	0	0.473843
XLOC_000573	XLOC_000573	GSTM5	TSS708	chr1:110254863-110260890	0	0	0	0	0	0	0	0	0	0	0	0
XLOC_000574	XLOC_000574	CSF1	TSS709	chr1:110453232-110473616	5.50892	3.79042	7.22742	8.33667	5.80788	10.8655	5.20258	3.53891	6.86625	7.3033	4.98812	9.61847
XLOC_000575	XLOC_000575	AHCYL1	TSS710,TSS711,TSS712	chr1:110527386-110566364	38.5277	28.8989	48.1565	44.3641	33.4173	55.3109	36.6001	27.5489	45.6513	34.661	25.983	43.3389
XLOC_000576	XLOC_000576	STRIP1	TSS713,TSS714	chr1:110574198-110597263	9.83659	6.99278	12.6804	9.51051	6.78084	12.2402	9.35256	6.6256	12.0795	10.1067	7.22035	12.993
XLOC_000577	XLOC_000577	UBL4B	TSS715	chr1:110655061-110656569	0	0	0	0	0	0	0	0	0	0	0	0
XLOC_000578	XLOC_000578	SLC6A17	TSS716	chr1:110693131-110744823	0.0668223	0.0041774	0.129467	0.0242019	0	0.057132	0.0550757	0	0.111355	0.0428377	0	0.0912302
XLOC_000579	XLOC_000579	KCNC4	TSS717	chr1:110753335-110776674	0.482797	0.207127	0.758467	0.379168	0.148838	0.609498	0.392311	0.150782	0.63384	0.53395	0.247541	0.820359
XLOC_000580	XLOC_000580	RBM15	TSS718	chr1:110881944-110889303	5.25206	3.51836	6.98575	5.77747	3.94437	7.61058	5.64186	3.81425	7.46946	6.23086	4.26068	8.20105
XLOC_000581	XLOC_000581	PROK1	TSS719	chr1:110993787-110999976	0	0	0	0	0	0	0	0	0	0	0	0
XLOC_000582	XLOC_000582	CYMP	TSS720	chr1:111023387-111033891	0	0	0	0	0	0	0	0	0	0	0	0
XLOC_000583	XLOC_000583	CD53	TSS721,TSS722	chr1:111413820-111442558	0	0	0	0.0155603	0	0.11575	0	0	0	0.0580763	0	0.189825
XLOC_000584	XLOC_000584	CEPT1	TSS723,TSS724	chr1:111659953-111727724	6.24043	3.06653	9.41432	8.43881	4.38341	12.4942	7.29307	3.94686	10.6393	9.65186	5.47725	13.8265
XLOC_000585	XLOC_000585	CHI3L2	TSS725,TSS726	chr1:111770280-111786062	0	0	0	0	0	0	0	0	0	0	0	0
XLOC_000586	XLOC_000586	CHIAP2	TSS727	chr1:111823145-111828730	0	0	0	0	0	0	0	0	0	0	0	0
XLOC_000587	XLOC_000587	CHIA	TSS728	chr1:111833473-111863188	0	0	0	0	0	0	0	0	0	0	0	0
XLOC_000588	XLOC_000588	PIFO	TSS729	chr1:111889194-111895639	0.106737	0	0.23143	0.0180619	0	0.0801113	0.0609632	0	0.149804	0.0302084	0	0.0914057
XLOC_000589	XLOC_000589	ATP5F1	TSS730	chr1:111982511-112004525	87.1853	63.6551	110.716	82.2432	60.0967	104.39	68.5735	49.5644	87.5825	100.14	72.9188	127.361
XLOC_000590	XLOC_000590	C1orf162	TSS731	chr1:112016603-112021134	0.105125	0	0.32415	0.172007	0	0.411418	0.182387	0	0.454648	0.063497	0	0.236169
XLOC_000591	XLOC_000591	RAP1A	TSS732	chr1:112162404-112256101	8.01022	5.46564	10.5548	13.221	9.39803	17.044	10.1598	7.15886	13.1607	11.2897	7.92344	14.656
XLOC_000592	XLOC_000592	LOC100506343	TSS733	chr1:112264685-112310199	0.26646	0	0.817542	0.122179	0	0.492586	0.173834	0	0.619562	0.178637	0	0.602496
XLOC_000593	XLOC_000593	DDX20	TSS734	chr1:112264685-112310199	6.38478	4.32917	8.4404	7.55111	5.2064	9.89582	6.94212	4.74531	9.13892	6.63256	4.54141	8.7237
XLOC_000594	XLOC_000594	LOC643355	TSS735	chr1:112533189-112541463	0	0	0	0	0	0	0	0	0	0	0	0
XLOC_000595	XLOC_000595	CTTNBP2NL	TSS736	chr1:112938799-113003786	6.01869	4.39267	7.64471	5.79846	4.18474	7.41219	6.91992	5.06596	8.77389	5.1	3.6633	6.5367
XLOC_000596	XLOC_000596	WNT2B	TSS737,TSS738	chr1:113010039-113063910	0.147295	0	0.309758	0.119532	0	0.261596	0.103714	0	0.233253	0.112432	0	0.265201
XLOC_000597	XLOC_000597	CAPZA1	TSS739	chr1:113162074-113214241	76.7482	58.3304	95.1661	49.8306	37.6674	61.9939	41.5249	31.4036	51.6462	57.934	43.7447	72.1234
XLOC_000598	XLOC_000598	MOV10	TSS740	chr1:113217047-113243368	10.7062	7.72844	13.6839	9.27986	6.63888	11.9208	12.0009	8.71685	15.2849	11.5596	8.35206	14.7672
XLOC_000599	XLOC_000599	FAM19A3	TSS741	chr1:113263188-113269856	0.0529427	0	0.243741	0.0765374	0	0.264776	0.108796	0	0.359684	0.0916743	0	0.339964
XLOC_000600	XLOC_000600	AKR7A2P1	TSS742	chr1:113454469-113498975	0.0785092	0	0.714941	0	0	0	0.0202869	0	0.20969	0.0252303	0	0.407854
XLOC_000601	XLOC_000601	LRIG2	TSS743	chr1:113615830-113667342	2.22948	1.42745	3.03151	2.40332	1.534	3.27265	2.21056	1.40093	3.02018	1.9374	1.18819	2.68661
XLOC_000602	XLOC_000602	MAGI3	TSS744	chr1:113933474-114228545	2.92322	2.01145	3.83499	2.68264	1.82546	3.53983	2.61884	1.77463	3.46305	2.07354	1.37607	2.771
XLOC_000603	XLOC_000603	AP4B1-AS1	TSS745	chr1:114356432-114447741	0.0144761	0	0.126564	0	0	0	0	0	0	0	0	0
XLOC_000604	XLOC_000604	DCLRE1B	TSS746	chr1:114447914-114456708	4.80272	3.29265	6.31279	4.50904	3.07397	5.9441	4.52777	3.09019	5.96534	4.56785	3.11327	6.02242
XLOC_000605	XLOC_000605	HIPK1	TSS747,TSS748,TSS749	chr1:114471995-114520491	8.8264	6.4347	11.2181	5.49519	3.98476	7.00563	6.34599	4.67627	8.01572	7.78311	5.37111	10.1951
XLOC_000606	XLOC_000606	OLFML3	TSS750	chr1:114522029-114524875	0.933348	0.341964	1.52473	0.690349	0.223749	1.15695	1.61235	0.753076	2.47162	1.06309	0.420206	1.70598
XLOC_000607	XLOC_000607	SYCP1	TSS751	chr1:115397454-115537990	0	0	0	0	0	0	0	0	0	0	0	0
XLOC_000608	XLOC_000608	TSHB	TSS752	chr1:115572414-115576941	0	0	0	0	0	0	0	0	0	0	0	0
XLOC_000609	XLOC_000609	VANGL1	TSS753,TSS754	chr1:116184573-116240845	8.67182	6.47812	10.8655	3.74833	2.69878	4.79788	6.59308	4.86382	8.32235	4.61749	3.36127	5.87371
XLOC_000610	XLOC_000610	SLC22A15	TSS755	chr1:116519118-116612675	0.856876	0.470731	1.24302	1.10414	0.632178	1.57609	1.27594	0.760959	1.79093	1.17508	0.688769	1.66139
XLOC_000611	XLOC_000611	MAB21L3	TSS756	chr1:116654375-116677861	1.51412	0.833366	2.19488	1.26355	0.658949	1.86816	1.3353	0.712989	1.95762	1.32916	0.697426	1.9609
XLOC_000612	XLOC_000612	ATP1A1	TSS757,TSS758,TSS759	chr1:116915794-116961244	99.8224	74.7655	124.879	86.2234	65.0652	107.381	105.716	79.581	131.851	108.189	80.8699	135.509
XLOC_000613	XLOC_000613	MIR320B1	TSS760	chr1:117214370-117214449	0	0	0	0	0	0	0	0	0	0	0	0
XLOC_000614	XLOC_000614	CD2	TSS761	chr1:117297085-117311851	0	0	0	0	0	0	0	0	0	0	0	0
XLOC_000615	XLOC_000615	PTGFRN	TSS762	chr1:117452688-117532972	15.6593	11.7098	19.6089	19.4127	14.6067	24.2188	17.6728	13.2716	22.074	18.5503	13.9252	23.1755
XLOC_000616	XLOC_000616	CD101	TSS763	chr1:117544371-117579173	0.171627	0.0119789	0.331275	0.1603	0.0133821	0.307218	0.081446	0	0.187117	0.190552	0.0159083	0.365195
XLOC_000617	XLOC_000617	TTF2	TSS764	chr1:117602948-117645491	8.47341	6.14922	10.7976	10.0593	7.35218	12.7663	8.86626	6.45415	11.2784	11.5599	8.49832	14.6214
XLOC_000618	XLOC_000618	MIR942	TSS765	chr1:117602948-117645491	0	0	0	0	0	0	0	0	0	0	0	0
XLOC_000619	XLOC_000619	MAN1A2	TSS766	chr1:117910084-118068320	10.739	7.9368	13.5411	19.216	14.4143	24.0177	14.0253	10.4799	17.5707	12.0134	8.92397	15.1028
XLOC_000620	XLOC_000620	FAM46C	TSS767	chr1:118148603-118171011	0.16694	0.0423494	0.291531	0.186228	0.0532362	0.31922	0.190043	0.0585613	0.321525	0.149764	0.0379276	0.261601
XLOC_000621	XLOC_000621	WDR3	TSS768	chr1:118472371-118727848	10.4519	7.57609	13.3278	9.06825	6.54508	11.5914	10.1773	7.38823	12.9664	11.4981	8.38076	14.6155
XLOC_000622	XLOC_000622	HAO2	TSS769	chr1:119911401-119936751	0	0	0	0	0	0	0.0139194	0	0.116417	0	0	0
XLOC_000623	XLOC_000623	HSD3B2	TSS770,TSS771	chr1:119957553-119965662	0	0	0	0	0	0	0	0	0	0	0	0
XLOC_000624	XLOC_000624	HSD3B1	TSS772	chr1:120049825-120057681	0	0	0	0.0149345	0	0.081971	0	0	0	0	0	0
XLOC_000625	XLOC_000625	HSD3BP4	TSS773	chr1:120106502-120115199	0.00766593	0	0.0267813	0	0	0	0.00428963	0	0.0202476	0	0	0
XLOC_000626	XLOC_000626	PHGDH	TSS774	chr1:120254418-120286849	218.124	165.795	270.452	198.119	149.273	246.965	213.684	161.73	265.638	261.489	197.735	325.243
XLOC_000627	XLOC_000627	FAM72B	TSS775	chr1:120839004-120855681	5.03252	3.27262	6.79242	5.25718	3.44026	7.0741	3.74549	2.36384	5.12713	3.52684	2.19971	4.85397
XLOC_000628	XLOC_000628	HIST2H2BA	TSS776	chr1:120906033-120914842	0	0	0	0	0	0	0	0	0	0	0	0
XLOC_000629	XLOC_000629	SRGAP2D	TSS777	chr1:121107151-121129827	12.2503	7.65357	16.8471	16.0082	10.3127	21.7038	13.1568	8.29532	18.0183	14.8385	9.58261	20.0943
XLOC_000630	XLOC_000630	EMBP1	TSS778	chr1:121260909-121313686	0.426584	0.176332	0.676837	0.351402	0.128995	0.573809	0.434353	0.18415	0.684555	0.348683	0.131182	0.566184
XLOC_000631	XLOC_000631	LOC100130000	TSS779	chr1:143687129-143714180	0.028718	0	0.112065	0.0393568	0	0.125846	0.0215791	0	0.0826795	0	0	0
XLOC_000632	XLOC_000632	NBPF9	TSS780	chr1:144614958-144828810	2.27344	1.32035	3.22654	2.04138	1.14858	2.93418	1.81502	0.998175	2.63186	3.48172	2.17384	4.78961
XLOC_000633	XLOC_000633	SEC22B	TSS781	chr1:145096406-145116997	93.3196	70.5482	116.091	58.1135	43.4477	72.7792	76.809	57.8131	95.805	81.4133	61.3381	101.488
XLOC_000634	XLOC_000634	NOTCH2NL	TSS782	chr1:145209110-145285912	3.67192	2.55121	4.79262	4.22334	2.96077	5.4859	3.40253	2.34202	4.46304	5.50144	3.93757	7.06531
XLOC_000635	XLOC_000635	NBPF10	TSS783	chr1:145293370-145368684	1.59691	1.09479	2.09903	1.11849	0.736214	1.50078	1.55324	1.05938	2.04711	1.41763	0.94273	1.89253
XLOC_000636	XLOC_000636	HFE2	TSS784	chr1:145413190-145417545	0	0	0	0	0	0	0.0242285	0	0.176042	0	0	0
XLOC_000637	XLOC_000637	TXNIP	TSS785	chr1:145438461-145442628	69.5209	52.5509	86.491	52.4227	39.4151	65.4304	85.0065	64.351	105.662	69.5814	52.7609	86.402
XLOC_000638	XLOC_000638	ANKRD34A	TSS786	chr1:145470507-145475647	0.367872	0.130433	0.605312	0.839482	0.420586	1.25838	0.59917	0.270376	0.927964	0.725116	0.344957	1.10528
XLOC_000639	XLOC_000639	LIX1L	TSS787	chr1:145477084-145499091	8.14599	5.19259	11.0994	9.51949	6.25353	12.7855	6.65809	4.13048	9.1857	6.96178	4.32699	9.59656
XLOC_000640	XLOC_000640	RBM8A	TSS788	chr1:145507556-145516076	21.8393	15.9677	27.7109	42.1534	31.1765	53.1303	39.3017	29.0787	49.5246	41.111	30.396	51.826
XLOC_000641	XLOC_000641	PEX11B	TSS789,TSS790	chr1:145516164-145523732	18.2756	13.0614	23.4898	19.2676	13.8142	24.7211	13.9651	9.81137	18.1188	15.0418	10.6263	19.4573
XLOC_000642	XLOC_000642	ITGA10	TSS791	chr1:145524989-145543868	0.0292568	0	0.075387	0.0262896	0	0.0656495	0.0509742	0	0.111698	0.0285424	0	0.0744376
XLOC_000643	XLOC_000643	ANKRD35	TSS792	chr1:145549208-145568526	1.32224	0.690489	1.95399	1.88176	1.02094	2.74258	2.10709	1.23053	2.98364	0.563217	0.195662	0.930771
XLOC_000644	XLOC_000644	PIAS3	TSS793	chr1:145575987-145589435	35.1875	26.288	44.0871	46.2642	34.6739	57.8546	42.7761	32.1874	53.3648	24.4121	18.0308	30.7935
XLOC_000645	XLOC_000645	RNF115	TSS794	chr1:145611035-145688776	55.6349	41.5772	69.6927	65.0536	48.7868	81.3204	46.0491	34.2866	57.8116	40.7372	30.1648	51.3096
XLOC_000646	XLOC_000646	PDZK1	TSS795	chr1:145727665-145764206	0.236884	0	0.479317	0.328415	0.0408776	0.615953	0.195458	0	0.406383	0.329328	0.0200183	0.638638
XLOC_000647	XLOC_000647	GPR89C	TSS796	chr1:145883867-145924049	0	0	0	0	0	0	0	0	0	0	0	0
XLOC_000648	XLOC_000648	HYDIN2	TSS797	chr1:146310551-146334210	0	0	0	0	0	0	0	0	0	0	0	0
XLOC_000649	XLOC_000649	PDIA3P	TSS798	chr1:146649429-146651528	0.961972	0.36596	1.55798	0.986955	0.374263	1.59965	1.42429	0.639879	2.20871	0.733391	0.236806	1.22998
XLOC_000650	XLOC_000650	CHD1L	TSS799	chr1:146714290-146767447	15.4186	11.2568	19.5805	13.7733	9.99804	17.5485	18.2535	13.3889	23.1181	12.5223	9.04757	15.997
XLOC_000651	XLOC_000651	BCL9	TSS800	chr1:147013181-147098015	14.0528	10.4993	17.6063	20.4878	15.4135	25.5621	11.898	8.8733	14.9227	10.1823	7.54743	12.8172
XLOC_000652	XLOC_000652	GJA8	TSS801	chr1:147374945-147381395	0.0234818	0	0.108301	0	0	0	0	0	0	0	0	0
XLOC_000653	XLOC_000653	GPR89B,GPR89C	TSS802,TSS803	chr1:147400505-147465755	0.435973	0.112696	0.759251	0.58431	0.176522	0.992098	0.753783	0.289597	1.21797	0.8005	0.322232	1.27877
XLOC_000654	XLOC_000654	NBPF15,NBPF16	TSS804,TSS805,TSS806	chr1:148558187-148596267	0.642064	0.301145	0.982982	0.461372	0.188307	0.734438	0.442896	0.178913	0.706878	0.866721	0.444831	1.28861
XLOC_000655	XLOC_000655	PPIAL4E	TSS807	chr1:148644010-148644795	0	0	0	0	0	0	0	0	0	0	0	0
XLOC_000656	XLOC_000656	NBPF16	TSS808	chr1:148739441-148758311	0	0	0	0.00621235	0	0.0348608	0	0	0	0	0	0
XLOC_000657	XLOC_000657	PPIAL4D	TSS809	chr1:148806014-148806799	0	0	0	0	0	0	0	0	0	0	0	0
XLOC_000658	XLOC_000658	LOC645166	TSS810,TSS811	chr1:148928285-148953054	0.470974	0	1.29509	1.11206	0	2.39345	0.806486	0	1.86966	1.34937	0	2.76613
XLOC_000659	XLOC_000659	LOC388692	TSS812	chr1:149279475-149291742	0.186817	0.0855393	0.288094	0.0796153	0.0230873	0.136143	0.143268	0.0584592	0.228076	0.136456	0.0554835	0.217428
XLOC_000660	XLOC_000660	FCGR1C	TSS813	chr1:149369293-149378297	0	0	0	0	0	0	0	0	0	0	0	0
XLOC_000661	XLOC_000661	PPIAL4B	TSS814	chr1:149553002-149553787	0	0	0	0	0	0	0	0	0	0	0	0
XLOC_000662	XLOC_000662	FAM91A2,LINC00623	TSS815,TSS816	chr1:149576261-149672733	0.0457221	0	0.322911	0	0	0	0.0239395	0	0.289498	0.0387368	0	0.342862
XLOC_000663	XLOC_000663	FCGR1A	TSS817	chr1:149754244-149783928	0	0	0	0	0	0	0	0	0	0	0	0
XLOC_000664	XLOC_000664	HIST2H4B	TSS818	chr1:149804220-149804616	0	0	0	0	0	0	0	0	0	0	0	0
XLOC_000665	XLOC_000665	HIST2H2AA3	TSS819	chr1:149822627-149823161	0	0	0	0	0	0	0	0	0	0	0	0
XLOC_000666	XLOC_000666	HIST2H3C	TSS820	chr1:149824180-149824687	0	0	0	0	0	0	0	0	0	0	0	0
XLOC_000667	XLOC_000667	HIST2H2AC	TSS821	chr1:149858524-149858961	8.29742	3.67197	12.9229	9.17832	4.50132	13.8553	4.10015	1.20916	6.99114	9.61481	4.61625	14.6134
XLOC_000668	XLOC_000668	BOLA1	TSS822	chr1:149871154-149872348	8.86618	5.39861	12.3337	10.25	6.41014	14.0898	8.49169	5.14035	11.843	6.84737	3.95771	9.73704
XLOC_000669	XLOC_000669	VPS45	TSS823	chr1:150039341-150117505	22.971	17.0304	28.9116	22.007	16.3006	27.7134	25.8293	19.215	32.4436	26.3717	19.6044	33.1391
XLOC_000670	XLOC_000670	PLEKHO1	TSS824	chr1:150122169-150131825	53.9867	40.0568	67.9166	28.0837	20.2518	35.9155	39.4931	29.278	49.7081	39.2943	28.8371	49.7516
XLOC_000671	XLOC_000671	CA14	TSS825	chr1:150230217-150237480	0.267047	0.0160494	0.518045	0.236726	0.00727772	0.466173	0.218521	0	0.446815	0.480533	0.109845	0.851221
XLOC_000672	XLOC_000672	C1orf54	TSS826	chr1:150245182-150253335	2.18591	0.480863	3.89095	1.30844	0.12873	2.48815	2.18176	0.484532	3.87898	1.81549	0.285038	3.34595
XLOC_000673	XLOC_000673	C1orf51	TSS827	chr1:150255228-150259501	3.51589	2.04224	4.98955	6.04484	3.86307	8.2266	5.14283	3.20377	7.08189	6.14134	3.90762	8.37506
XLOC_000674	XLOC_000674	MRPS21	TSS828	chr1:150266268-150280819	269.652	196.899	342.404	258.621	202.129	315.112	245.288	185.781	304.795	315.56	234.071	397.05
XLOC_000675	XLOC_000675	PRPF3	TSS829	chr1:150293927-150325704	18.6139	13.6391	23.5888	15.9106	11.5668	20.2544	17.0123	12.3806	21.6439	24.7964	18.3364	31.2565
XLOC_000676	XLOC_000676	RPRD2	TSS830	chr1:150336989-150449041	13.5808	10.199	16.9626	14.4309	10.8445	18.0172	14.3825	10.8122	17.9528	13.6872	10.2614	17.1129
XLOC_000677	XLOC_000677	TARS2	TSS831	chr1:150459839-150480085	24.0444	17.814	30.2748	24.3616	17.948	30.7751	21.6336	16.0176	27.2496	21.0538	15.4548	26.6529
XLOC_000678	XLOC_000678	ECM1	TSS832	chr1:150480486-150486265	0.717152	0.239019	1.19529	0.461537	0.0943937	0.828681	0.641163	0.205545	1.07678	0.663901	0.224208	1.10359
XLOC_000679	XLOC_000679	LINC00568	TSS833	chr1:150488232-150490508	0.308718	0	0.830783	0.164736	0	0.533015	0.247223	0	0.648452	0.318297	0	0.87117
XLOC_000680	XLOC_000680	ADAMTSL4	TSS834	chr1:150521897-150533412	1.3118	0.753672	1.86994	0.591603	0.273137	0.91007	1.32257	0.773901	1.87125	1.31182	0.705939	1.9177
XLOC_000681	XLOC_000681	MIR4257	TSS835	chr1:150521897-150533412	0	0	0	0	0	0	0	0	0	0	0	0
XLOC_000682	XLOC_000682	SETDB1	TSS836	chr1:150898814-150937220	28.6731	20.0339	37.3123	34.2939	24.3901	44.1977	26.3007	18.3784	34.2231	22.5878	15.6878	29.4878
XLOC_000683	XLOC_000683	ANXA9	TSS837	chr1:150954498-150968114	6.78381	4.38479	9.18283	5.96491	3.71698	8.21284	14.4309	10.0456	18.8163	10.7909	7.21132	14.3705
XLOC_000684	XLOC_000684	PRUNE	TSS838	chr1:150980972-151008189	21.2661	15.7632	26.769	17.5456	12.9273	22.1638	20.4539	15.1327	25.7752	20.0193	14.8194	25.2193
XLOC_000685	XLOC_000685	BNIPL	TSS839	chr1:151009028-151020076	1.19794	0.515949	1.87992	0.156449	0	0.343633	0.835446	0.309589	1.3613	0.25979	0.0137384	0.505842
XLOC_000686	XLOC_000686	C1orf56	TSS840	chr1:151020258-151032125	5.4994	0	11.6265	6.46762	0.820273	12.115	6.14414	0.210499	12.0778	5.11396	0	10.8371
XLOC_000687	XLOC_000687	MLLT11	TSS841	chr1:151032150-151040973	7.89822	5.33524	10.4612	8.75149	5.9626	11.5404	6.08444	3.97579	8.19309	8.89578	6.08301	11.7086
XLOC_000688	XLOC_000688	GABPB2	TSS842	chr1:151043079-151091007	5.24043	3.30042	7.18044	3.86882	2.30051	5.43713	3.49827	2.05286	4.94369	2.64207	1.45386	3.83029
XLOC_000689	XLOC_000689	SCNM1,TNFAIP8L2,TNFAIP8L2-SCNM1	TSS843,TSS844	chr1:151129104-151148547	24.4593	17.067	31.8515	25.7923	17.6429	33.9417	22.2175	14.8676	29.5675	26.2089	18.0771	34.3408
XLOC_000690	XLOC_000690	PIP5K1A	TSS845	chr1:151171020-151222007	39.2223	29.4872	48.9574	29.1394	21.8898	36.3891	43.5288	32.8503	54.2073	36.8661	27.6879	46.0442
XLOC_000691	XLOC_000691	PSMD4	TSS846	chr1:151227196-151239954	151.341	114.197	188.485	206.143	156.081	256.206	162.312	123.036	201.588	174.736	132.196	217.277
XLOC_000692	XLOC_000692	ZNF687	TSS847	chr1:151254790-151300191	15.3656	8.9082	21.8229	19.2084	12.3883	26.0284	16.016	9.67346	22.3585	15.1138	9.22044	21.0072
XLOC_000693	XLOC_000693	PSMB4	TSS848	chr1:151372040-151374412	411.535	311.615	511.454	497.344	376.734	617.953	370.188	280.408	459.968	451.854	342.308	561.4
XLOC_000694	XLOC_000694	CGN	TSS849	chr1:151483861-151511167	43.9898	33.431	54.5487	47.4637	35.8972	59.0303	56.0647	42.6922	69.4373	42.0053	31.7839	52.2268
XLOC_000695	XLOC_000695	TUFT1	TSS850	chr1:151512780-151556059	20.5184	15.1008	25.936	14.4032	10.4704	18.3361	37.5722	28.195	46.9493	16.2282	11.8297	20.6266
XLOC_000696	XLOC_000696	MIR554	TSS851	chr1:151512780-151556059	0	0	0	0	0	0	0	0	0	0	0	0
XLOC_000697	XLOC_000697	SNX27	TSS852	chr1:151584661-151671559	7.47625	5.51403	9.43847	11.7691	8.76272	14.7756	11.3937	8.51077	14.2766	9.27948	6.81474	11.7442
XLOC_000698	XLOC_000698	RIIAD1	TSS853	chr1:151694012-151702082	0	0	0	0.136271	0	0.521752	0	0	0	0	0	0
XLOC_000699	XLOC_000699	OAZ3	TSS854,TSS855	chr1:151732122-151743806	9.34951	0	19.5701	8.08407	0.399438	15.7687	12.2449	1.66942	22.8204	12.2058	1.10199	23.3096
XLOC_000700	XLOC_000700	LOC100132111	TSS856	chr1:151810338-151816641	0.272477	0	0.775401	0.279325	0	0.996021	0.61365	0	1.41308	0.355809	0	1.0203
XLOC_000701	XLOC_000701	LCE5A	TSS857	chr1:152483319-152484653	0	0	0	0	0	0	0.0346808	0	0.191382	0	0	0
XLOC_000702	XLOC_000702	CRCT1	TSS858	chr1:152486977-152488481	0	0	0	0	0	0	0	0	0	0	0	0
XLOC_000703	XLOC_000703	LCE3C	TSS859	chr1:152573137-152573562	0	0	0	0	0	0	0	0	0	0	0	0
XLOC_000704	XLOC_000704	LCE3B	TSS860	chr1:152586286-152586574	0	0	0	0	0	0	0	0	0	0	0	0
XLOC_000705	XLOC_000705	LCE2D	TSS861	chr1:152635886-152637135	0	0	0	0	0	0	0	0	0	0	0	0
XLOC_000706	XLOC_000706	LCE2C	TSS862	chr1:152647790-152649049	0	0	0	0	0	0	0	0	0	0	0	0
XLOC_000707	XLOC_000707	LCE2B	TSS863	chr1:152658598-152659876	0	0	0	0	0	0	0	0	0	0	0	0
XLOC_000708	XLOC_000708	LCE2A	TSS864	chr1:152670839-152671918	0	0	0	0	0	0	0	0	0	0	0	0
XLOC_000709	XLOC_000709	LCE4A	TSS865	chr1:152681522-152681910	0	0	0	0	0	0	0	0	0	0	0	0
XLOC_000710	XLOC_000710	C1orf68	TSS866	chr1:152691997-152692905	0	0	0	0	0	0	0	0	0	0	0	0
XLOC_000711	XLOC_000711	KPRP	TSS867	chr1:152730505-152734529	0	0	0	0	0	0	0	0	0	0	0	0
XLOC_000712	XLOC_000712	LCE1F	TSS868	chr1:152748847-152749445	0	0	0	0	0	0	0	0	0	0	0	0
XLOC_000713	XLOC_000713	LCE1E	TSS869	chr1:152758752-152760901	0	0	0	0	0	0	0	0	0	0	0	0
XLOC_000714	XLOC_000714	LCE1D	TSS870	chr1:152769226-152770657	0	0	0	0	0	0	0	0	0	0	0	0
XLOC_000715	XLOC_000715	LCE1B	TSS871	chr1:152784446-152785585	0	0	0	0	0	0	0	0	0	0	0	0
XLOC_000716	XLOC_000716	LCE1A	TSS872	chr1:152799948-152800573	0	0	0	0	0	0	0	0	0	0	0	0
XLOC_000717	XLOC_000717	LCE6A	TSS873	chr1:152815329-152816459	0	0	0	0	0	0	0	0	0	0	0	0
XLOC_000718	XLOC_000718	SMCP	TSS874	chr1:152850797-152857523	0	0	0	0	0	0	0	0	0	0	0	0
XLOC_000719	XLOC_000719	IVL	TSS875	chr1:152881038-152884362	0	0	0	0	0	0	0	0	0	0	0	0
XLOC_000720	XLOC_000720	SPRR4	TSS876	chr1:152943127-152945069	0	0	0	0	0	0	0.0306434	0	0.175026	0	0	0
XLOC_000721	XLOC_000721	SPRR1A	TSS877	chr1:152956563-152958290	0	0	0	0	0	0	0	0	0	0	0	0
XLOC_000722	XLOC_000722	SPRR3	TSS878	chr1:152974222-152976332	0	0	0	0	0	0	0	0	0	0	0	0
XLOC_000723	XLOC_000723	SPRR1B	TSS879	chr1:153003678-153005376	0	0	0	0	0	0	0	0	0	0	0	0
XLOC_000724	XLOC_000724	LELP1	TSS880	chr1:153175905-153177601	0	0	0	0	0	0	0	0	0	0	0	0
XLOC_000725	XLOC_000725	PRR9	TSS881	chr1:153190059-153191793	0	0	0	0	0	0	0	0	0	0	0	0
XLOC_000726	XLOC_000726	LOR	TSS882	chr1:153232178-153234600	0	0	0	0	0	0	0	0	0	0	0	0
XLOC_000727	XLOC_000727	S100A9	TSS883	chr1:153330329-153333503	45.3457	29.9848	60.7066	39.7321	25.6248	53.8394	39.7206	26.0146	53.4265	57.5613	38.9181	76.2046
XLOC_000728	XLOC_000728	S100A7A	TSS884	chr1:153388999-153395701	0	0	0	0	0	0	0	0	0	0.00542388	0	0.0287151
XLOC_000729	XLOC_000729	S100A1	TSS885	chr1:153591275-153618782	10.5298	0	31.2855	8.8681	0	27.2123	10.7081	0	30.578	7.62099	0	25.8964
XLOC_000730	XLOC_000730	CHTOP	TSS886	chr1:153591275-153618782	48.2938	30.6191	65.9684	45.4855	28.671	62.2999	43.1225	28.3895	57.8556	47.9499	30.4095	65.4903
XLOC_000731	XLOC_000731	SNAPIN	TSS887	chr1:153631129-153643504	65.0143	8.53793	121.491	52.9479	5.00389	100.892	51.2042	7.52235	94.886	58.5508	7.09958	110.002
XLOC_000732	XLOC_000732	NPR1	TSS888	chr1:153651163-153666468	3.69278	2.46108	4.92449	2.73986	1.78023	3.69948	2.03968	1.26468	2.81469	4.14304	2.80532	5.48076
XLOC_000733	XLOC_000733	INTS3	TSS889	chr1:153700566-153746555	30.1673	22.7655	37.569	31.7125	23.9106	39.5145	25.0185	18.7778	31.2592	33.4655	25.225	41.7061
XLOC_000734	XLOC_000734	SLC27A3	TSS890	chr1:153747767-153752633	8.41645	5.79074	11.0422	5.67084	3.77239	7.5693	7.78059	5.34583	10.2153	9.54972	6.66371	12.4357
XLOC_000735	XLOC_000735	CREB3L4	TSS891,TSS892	chr1:153931574-153950451	11.2694	0	26.336	8.20753	0	21.3594	8.22999	0	21.8189	6.8017	0	18.6676
XLOC_000736	XLOC_000736	RPS27	TSS893	chr1:153963238-153964631	5037.12	3812.12	6262.11	5853.39	4439.53	7267.26	6729.19	5082.64	8375.74	6355.65	4818.27	7893.04
XLOC_000737	XLOC_000737	UBAP2L	TSS894,TSS895	chr1:154179182-154243329	92.8621	60.0957	125.629	109.827	76.7327	142.922	92.4029	61.5536	123.252	93.7058	60.6836	126.728
XLOC_000738	XLOC_000738	HAX1	TSS896	chr1:154245038-154248355	211.427	163.161	259.692	158.308	122.594	194.023	138.619	106.525	170.713	232.006	179.106	284.905
XLOC_000739	XLOC_000739	AQP10	TSS897	chr1:154293591-154297801	0	0	0	0.0190647	0	0.091164	0	0	0	0	0	0
XLOC_000740	XLOC_000740	ATP8B2	TSS898,TSS899	chr1:154298035-154323780	9.44358	6.47381	12.4133	9.37489	6.63455	12.1152	8.47141	5.86262	11.0802	6.43834	4.36014	8.51654
XLOC_000741	XLOC_000741	IL6R	TSS900	chr1:154377668-154441926	2.72397	1.8655	3.58245	3.70479	2.58844	4.82113	2.47356	1.65394	3.29317	2.52002	1.70673	3.33331
XLOC_000742	XLOC_000742	TDRD10	TSS901	chr1:154474694-154520623	0.013907	0	0.0827707	0	0	0	0.0393568	0	0.123679	0	0	0
XLOC_000743	XLOC_000743	CHRNB2	TSS902	chr1:154540256-154552353	0.0268226	0	0.0662355	0.00810513	0	0.0266403	0.0265242	0	0.0648731	0.0141616	0	0.0421194
XLOC_000744	XLOC_000744	CKS1B	TSS903	chr1:154947117-154951725	132.528	99.4241	165.631	122.786	91.0361	154.537	124.119	92.731	155.506	140.36	105.597	175.123
XLOC_000745	XLOC_000745	MIR4258	TSS904	chr1:154947117-154951725	0	0	0	0	0	0	81.735	74.1984	89.2716	0	0	0
XLOC_000746	XLOC_000746	FLAD1	TSS905	chr1:154955769-154965587	47.0933	35.206	58.9805	35.1675	25.9482	44.3868	39.6866	29.4482	49.9249	45.7091	34.0629	57.3552
XLOC_000747	XLOC_000747	LENEP	TSS906	chr1:154966061-154966791	0.0527178	0	0.251205	0.0483725	0	0.239742	0	0	0	0.183574	0	0.526828
XLOC_000748	XLOC_000748	ZBTB7B	TSS907	chr1:154975105-154991001	31.3764	23.5191	39.2337	40.4266	30.4941	50.3592	36.6467	27.5909	45.7025	34.4246	25.8493	42.9999
XLOC_000749	XLOC_000749	DCST1	TSS908	chr1:155006281-155042029	0.0281205	0	0.355894	0.160553	0	0.942041	0.140854	0	0.90056	0.0858605	0	0.73465
XLOC_000750	XLOC_000750	ADAM15	TSS909	chr1:155006281-155042029	41.2848	30.4025	52.1671	48.0133	35.6601	60.3664	53.9527	40.0637	67.8417	65.7707	49.1232	82.4183
XLOC_000751	XLOC_000751	EFNA4	TSS910	chr1:155006281-155042029	12.9581	3.16464	22.7515	8.60703	0.378979	16.8351	10.8008	1.38958	20.2121	10.8752	0.242365	21.508
XLOC_000752	XLOC_000752	EFNA3	TSS911	chr1:155051347-155060014	2.76552	1.57061	3.96043	3.73617	2.32197	5.15037	3.18326	1.90642	4.4601	3.31293	1.94684	4.67901
XLOC_000753	XLOC_000753	EFNA1	TSS912	chr1:155100348-155107386	24.7398	17.8675	31.612	21.4973	15.3518	27.6427	22.9922	16.5373	29.447	23.6809	17.097	30.2648
XLOC_000754	XLOC_000754	SLC50A1	TSS913	chr1:155108287-155111334	39.5358	29.0575	50.0142	116.304	88.0989	144.51	100.298	76.0218	124.574	116.197	87.658	144.737
XLOC_000755	XLOC_000755	TRIM46	TSS914,TSS915	chr1:155146262-155157447	0.827995	0.36393	1.29206	0.691019	0.291589	1.09045	0.927912	0.450442	1.40538	0.9617	0.444596	1.4788
XLOC_000756	XLOC_000756	MIR92B	TSS916	chr1:155164967-155165063	0	0	0	0	0	0	0	0	0	0	0	0
XLOC_000757	XLOC_000757	MTX1	TSS917	chr1:155178489-155197325	18.0426	12.731	23.3542	5.68325	3.31674	8.04977	16.0097	11.2406	20.7788	18.988	13.3462	24.6299
XLOC_000758	XLOC_000758	HCN3	TSS918	chr1:155247217-155271225	1.05841	0.529989	1.58684	1.66228	0.937884	2.38667	1.20113	0.622679	1.77958	1.09138	0.548687	1.63408
XLOC_000759	XLOC_000759	FDPS	TSS919,TSS920	chr1:155278538-155300909	193.596	137.556	249.637	170.058	120.639	219.477	203.576	144.269	262.884	195.234	137.635	252.832
XLOC_000760	XLOC_000760	RUSC1	TSS921,TSS922,TSS923	chr1:155278538-155300909	25.6386	8.63491	42.6423	24.7042	10.4987	38.9098	36.8108	17.7856	55.8359	38.0076	18.2477	57.7676
XLOC_000761	XLOC_000761	POU5F1P4	TSS924	chr1:155305051-155533735	0	0	0	0.0160285	0	0.415438	0.0156873	0	0.348741	0.0210499	0	0.494594
XLOC_000762	XLOC_000762	ASH1L-AS1	TSS925	chr1:155305051-155533735	1.13164	0	4.0892	1.64159	0	4.82925	1.27916	0	4.15843	1.2984	0	4.14472
XLOC_000763	XLOC_000763	MSTO1,MSTO2P	TSS926	chr1:155579960-155584758	4.95432	3.24028	6.66835	4.82086	3.14449	6.49722	4.43636	2.87147	6.00124	5.36934	3.54154	7.19714
XLOC_000764	XLOC_000764	DAP3	TSS927	chr1:155658881-155708800	94.0161	70.787	117.245	124.803	93.6387	155.967	89.1343	67.2061	111.062	114.269	86.3607	142.176
XLOC_000765	XLOC_000765	MSTO2P	TSS928	chr1:155715558-155826972	0.36655	0	1.35151	0.293066	0	1.14328	0.257033	0	1.01877	0.503202	0	1.58443
XLOC_000766	XLOC_000766	SYT11	TSS929	chr1:155829259-155854990	1.40437	0.853783	1.95495	1.98015	1.27874	2.68156	0.29748	0.117147	0.477813	0.796385	0.433493	1.15928
XLOC_000767	XLOC_000767	RXFP4	TSS930	chr1:155911479-155912625	0.0392715	0	0.170418	0.0925159	0	0.241368	0	0	0	0.0943684	0	0.267159
XLOC_000768	XLOC_000768	LAMTOR2	TSS931	chr1:156024516-156028301	143.473	105.02	181.927	128.076	93.8313	162.32	111.544	81.1852	141.902	151.803	111.61	191.996
XLOC_000769	XLOC_000769	RAB25	TSS932	chr1:156030965-156040295	34.5384	24.5562	44.5207	31.3473	22.1958	40.4987	44.9449	32.5561	57.3336	33.4802	23.6731	43.2873
XLOC_000770	XLOC_000770	LMNA	TSS933,TSS934,TSS935	chr1:156052368-156109880	278.841	207.812	349.869	242.885	182.249	303.522	296.083	219.63	372.535	258.835	193.438	324.231
XLOC_000771	XLOC_000771	SEMA4A	TSS936,TSS937	chr1:156119734-156147542	9.75304	6.89732	12.6088	6.33106	4.39722	8.26489	8.50846	6.01825	10.9987	7.17006	4.9892	9.35091
XLOC_000772	XLOC_000772	SLC25A44	TSS938	chr1:156163729-156182587	23.8963	17.9157	29.8768	22.8951	17.1323	28.6578	22.6833	16.9353	28.4313	21.4415	16.0037	26.8793
XLOC_000773	XLOC_000773	BGLAP,PMF1,PMF1-BGLAP	TSS939,TSS940	chr1:156182778-156217908	59.9191	43.6508	76.1875	70.3358	51.6264	89.0451	55.594	40.3791	70.809	61.0491	44.3345	77.7637
XLOC_000774	XLOC_000774	TMEM79	TSS941,TSS942	chr1:156252703-156262234	4.05459	2.52137	5.58781	2.11088	1.14321	3.07855	4.1542	2.59772	5.71068	4.09414	2.52514	5.66315
XLOC_000775	XLOC_000775	TSACC	TSS943	chr1:156278751-156316785	1.03787	0	8.68321	1.98895	0	13.8133	1.79193	0	10.6055	1.34375	0	10.7189
XLOC_000776	XLOC_000776	RHBG	TSS944	chr1:156338979-156355013	0.018184	0	0.159338	0.0230382	0	0.133395	0.0319567	0	0.162612	0.0131573	0	0.145242
XLOC_000777	XLOC_000777	TTC24	TSS945	chr1:156549518-156556562	0.044473	0	0.138523	0	0	0	0	0	0	0.0173236	0	0.0817382
XLOC_000778	XLOC_000778	APOA1BP	TSS946	chr1:156561557-156564091	148.53	112.37	184.689	146.156	110.402	181.911	127.809	96.4	159.219	160.432	121.201	199.663
XLOC_000779	XLOC_000779	HAPLN2	TSS947	chr1:156589085-156595517	0	0	0	0	0	0	0.0436774	0	0.150044	0	0	0
XLOC_000780	XLOC_000780	BCAN	TSS948	chr1:156611739-156629324	0	0	0	0.0302992	0	0.101516	0.00800151	0	0.060947	0	0	0
XLOC_000781	XLOC_000781	RRNAD1	TSS949	chr1:156698262-156706752	12.135	8.52759	15.7424	13.8299	9.76289	17.897	12.2879	8.638	15.9378	14.0134	9.84735	18.1794
XLOC_000782	XLOC_000782	PRCC	TSS950	chr1:156737273-156770609	62.634	47.0631	78.2049	57.404	43.1392	71.6688	62.4948	47.099	77.8906	61.603	46.269	76.9369
XLOC_000783	XLOC_000783	NTRK1	TSS951,TSS952	chr1:156776034-156851642	0.0345657	0	0.16956	0.0458878	0	0.193471	0.0491608	0	0.209465	0.0214211	0	0.139516
XLOC_000784	XLOC_000784	PEAR1	TSS953	chr1:156863522-156886226	0.224922	0.0687626	0.381081	0.303366	0.109948	0.496784	0.262765	0.0827978	0.442733	0.276184	0.0932385	0.459129
XLOC_000785	XLOC_000785	LRRC71	TSS954	chr1:156890423-156902880	0	0	0	0	0	0	0.0237283	0	0.0835771	0	0	0
XLOC_000786	XLOC_000786	CYCSP52	TSS955	chr1:157094458-157108383	0	0	0	0	0	0	0.263143	0	1.39292	1.43148	0	6.74678
XLOC_000787	XLOC_000787	KIRREL	TSS956	chr1:157963062-158065844	40.0221	29.9653	50.0789	28.6593	21.4707	35.8478	37.2847	28.0735	46.4958	47.8805	36.0106	59.7504
XLOC_000788	XLOC_000788	CD1D	TSS957	chr1:158149736-158156216	0.0219782	0	0.0638798	0.0846451	0	0.178076	0.0729034	0	0.155879	0.0505426	0	0.126827
XLOC_000789	XLOC_000789	CD1A	TSS958	chr1:158223926-158228058	0	0	0	0	0	0	0	0	0	0.0265634	0	0.105761
XLOC_000790	XLOC_000790	CD1C	TSS959	chr1:158259562-158264564	0.0120772	0	0.056268	0	0	0	0	0	0	0	0	0
XLOC_000791	XLOC_000791	CD1E	TSS960	chr1:158323485-158327343	0	0	0	0	0	0	0	0	0	0	0	0
XLOC_000792	XLOC_000792	OR10K1	TSS961	chr1:158435351-158436293	0	0	0	0	0	0	0	0	0	0	0	0
XLOC_000793	XLOC_000793	OR10R2	TSS962	chr1:158449667-158450675	0	0	0	0	0	0	0	0	0	0	0	0
XLOC_000794	XLOC_000794	OR10Z1	TSS963	chr1:158576228-158577170	0	0	0	0	0	0	0	0	0	0	0	0
XLOC_000795	XLOC_000795	OR6K6	TSS964	chr1:158724605-158725637	0	0	0	0	0	0	0	0	0	0	0	0
XLOC_000796	XLOC_000796	MNDA	TSS965	chr1:158801167-158819270	0	0	0	0	0	0	0	0	0	0	0	0
XLOC_000797	XLOC_000797	PYHIN1	TSS966	chr1:158901336-158946849	0	0	0	0	0	0	0	0	0	0	0	0
XLOC_000798	XLOC_000798	IFI16	TSS967	chr1:158979681-159024945	21.5941	15.8602	27.3279	22.291	16.3542	28.2277	47.1488	35.339	58.9586	21.0211	15.5395	26.5028
XLOC_000799	XLOC_000799	CADM3	TSS968	chr1:159141376-159172932	0.00576933	0	0.0452956	0.00664421	0	0.0496282	0.0235753	0	0.0734094	0	0	0
XLOC_000800	XLOC_000800	DARC	TSS969,TSS970	chr1:159173802-159176290	0	0	0	0	0	0	0	0	0	0	0	0
XLOC_000801	XLOC_000801	FCER1A	TSS971	chr1:159259503-159278014	0	0	0	0	0	0	0	0	0	0	0	0
XLOC_000802	XLOC_000802	OR10J1	TSS972	chr1:159409511-159410600	0	0	0	0	0	0	0	0	0	0	0	0
XLOC_000803	XLOC_000803	APCS	TSS973	chr1:159557615-159558661	0	0	0	0	0	0	0	0	0	0	0	0
XLOC_000804	XLOC_000804	DUSP23	TSS974	chr1:159750758-159752333	45.0439	31.4034	58.6843	55.0151	39.3647	70.6654	40.8904	28.7145	53.0662	45.6593	31.8741	59.4445
XLOC_000805	XLOC_000805	FCRL6	TSS975	chr1:159772172-159786047	0	0	0	0	0	0	0	0	0	0.0228016	0	0.0991862
XLOC_000806	XLOC_000806	SLAMF8	TSS976	chr1:159796478-159832447	0	0	0	0	0	0	0.0207137	0	0.0826759	0	0	0
XLOC_000807	XLOC_000807	LOC100505633	TSS977	chr1:159931013-159948876	0.19628	0	0.447353	0.0180169	0	0.106907	0.415581	0.00596412	0.825197	0.23528	0	0.54195
XLOC_000808	XLOC_000808	KCNJ9	TSS978	chr1:160051359-160059212	0.0132434	0	0.0554452	0	0	0	0.00682533	0	0.0410604	0.0278353	0	0.0833992
XLOC_000809	XLOC_000809	ATP1A2	TSS979	chr1:160085519-160113374	0.0175804	0	0.0526362	0.0121445	0	0.0394304	0.0426766	0	0.0958812	0.0192832	0	0.0543488
XLOC_000810	XLOC_000810	ATP1A4	TSS980,TSS981	chr1:160121351-160156767	0.0188203	0	0.150524	0.0102692	0	0.139337	0.00670811	0	0.13409	0	0	0
XLOC_000811	XLOC_000811	CASQ1	TSS982	chr1:160160284-160171676	0.0617241	0	0.174249	0	0	0	0.0511385	0	0.142834	0.0943051	0	0.226487
XLOC_000812	XLOC_000812	PEA15	TSS983	chr1:160175124-160185162	183.421	138.717	228.124	109.741	83.4092	136.073	232.272	175.007	289.538	253.392	191.055	315.729
XLOC_000813	XLOC_000813	SUMO1P3	TSS984	chr1:160258376-160328742	0	0	0	0.0433276	0	0.869676	0.0430496	0	1.11467	0.0949202	0	1.79885
XLOC_000814	XLOC_000814	NCSTN	TSS985	chr1:160258376-160328742	56.7374	29.1729	84.302	38.0281	23.1034	52.9529	39.7652	19.2636	60.2668	49.3049	26.3333	72.2765
XLOC_000815	XLOC_000815	NHLH1	TSS986	chr1:160336860-160342638	0.0841329	0	0.191804	0.126109	0	0.255686	0.032209	0	0.0891233	0.0891035	0	0.201595
XLOC_000816	XLOC_000816	VANGL2	TSS987	chr1:160370363-160398468	4.91377	3.48545	6.3421	3.34323	2.31506	4.37141	4.83158	3.43095	6.23221	1.98176	1.28131	2.6822
XLOC_000817	XLOC_000817	SLAMF7	TSS988	chr1:160709076-160724601	0.306481	0.0583766	0.554585	0.174256	0.0218224	0.32669	0.387365	0.108502	0.666228	0.323204	0.0586096	0.587799
XLOC_000818	XLOC_000818	LY9	TSS989	chr1:160765863-160798045	0	0	0	0	0	0	0	0	0	0	0	0
XLOC_000819	XLOC_000819	KLHDC9	TSS990	chr1:161068150-161070138	2.90846	1.37526	4.44166	6.20385	3.57927	8.82843	2.68264	1.22637	4.13892	2.31941	1.04547	3.59335
XLOC_000820	XLOC_000820	NIT1	TSS991	chr1:161070345-161102478	20.9969	8.40501	33.5889	21.9683	9.57118	34.3654	18.2211	7.8839	28.5582	20.516	8.81992	32.212
XLOC_000821	XLOC_000821	UFC1	TSS992	chr1:161123533-161128646	58.7833	43.281	74.2857	42.8804	31.2693	54.4915	50.9087	37.2732	64.5442	51.032	37.393	64.671
XLOC_000822	XLOC_000822	USP21	TSS993	chr1:161129253-161135516	15.999	11.477	20.5209	15.7482	11.3726	20.1238	12.8009	9.0592	16.5425	16.4505	11.8324	21.0685
XLOC_000823	XLOC_000823	PPOX	TSS994	chr1:161136180-161141010	5.635	3.52455	7.74544	5.25727	3.2216	7.29294	5.09008	3.15966	7.0205	5.13585	3.16185	7.10985
XLOC_000824	XLOC_000824	NDUFS2	TSS995,TSS996	chr1:161169104-161184184	66.0429	49.8174	82.2683	71.3415	53.6623	89.0207	67.8262	51.1803	84.4721	57.3926	43.014	71.7711
XLOC_000825	XLOC_000825	FCER1G	TSS997	chr1:161185086-161189038	0.270688	0	0.69464	0.0501401	0	0.255067	0.0887122	0	0.298681	0.109125	0	0.434682
XLOC_000826	XLOC_000826	MIR5187,TOMM40L	TSS998,TSS999	chr1:161195832-161208000	7.26928	4.45928	10.0793	6.75928	4.12351	9.39505	7.99184	5.09326	10.8904	7.55034	4.71374	10.3869
XLOC_000827	XLOC_000827	PCP4L1	TSS1000	chr1:161228516-161255240	0.772004	0.224076	1.31993	0.590221	0.134743	1.0457	0.859546	0.270723	1.44837	0.36204	0.0269419	0.697139
XLOC_000828	XLOC_000828	SDHC	TSS1001	chr1:161284165-161337673	21.6304	15.9475	27.3133	15.0692	11.0403	19.0981	22.1521	16.4123	27.892	20.4583	15.1821	25.7346
XLOC_000829	XLOC_000829	FCGR2A	TSS1002	chr1:161475204-161489360	0.0211907	0	0.0827495	0.0095272	0	0.0726947	0.034997	0	0.128278	0.0444288	0	0.131507
XLOC_000830	XLOC_000830	HSPA6	TSS1003	chr1:161494035-161496687	0.688436	0.261271	1.1156	0.431924	0.122891	0.740957	0.519895	0.17517	0.864621	0.629459	0.227586	1.03133
XLOC_000831	XLOC_000831	FCGR2C	TSS1004	chr1:161551128-161571010	0	0	0	0	0	0	0	0	0	0	0	0
XLOC_000832	XLOC_000832	HSPA7	TSS1005	chr1:161575848-161578341	0.0436267	0	0.118026	0.0121932	0	0.0615202	0.0108142	0	0.0611882	0.0250358	0	0.0950851
XLOC_000833	XLOC_000833	FCGR2B	TSS1006	chr1:161632904-161648444	0	0	0	0	0	0	0	0	0	0	0	0
XLOC_000834	XLOC_000834	FCRLA	TSS1007	chr1:161676761-161684142	0.0138984	0	0.174839	0	0	0	0.0332509	0	0.201852	0.0176872	0	0.196362
XLOC_000835	XLOC_000835	FCRLB	TSS1008	chr1:161692456-161697933	0.25352	0	0.513061	0.272743	0.0183325	0.527153	0.285803	0.0140443	0.557562	0.302792	0.0120864	0.593497
XLOC_000836	XLOC_000836	DUSP12	TSS1009	chr1:161719580-161726952	27.4464	19.4028	35.49	24.3127	17.0637	31.5617	25.9777	18.3322	33.6231	28.4666	20.2694	36.6638
XLOC_000837	XLOC_000837	ATF6	TSS1010	chr1:161736033-161933860	11.5469	8.64305	14.4507	12.2003	9.12172	15.2789	12.0405	9.02107	15.06	11.1927	8.36615	14.0193
XLOC_000838	XLOC_000838	NOS1AP	TSS1011,TSS1012	chr1:162039580-162339813	0.500879	0.231001	0.770757	0.523111	0.244372	0.801849	0.608148	0.293116	0.923179	0.446364	0.197098	0.695629
XLOC_000839	XLOC_000839	MIR4654	TSS1013	chr1:162039580-162339813	0	0	0	0	0	0	0	0	0	0	0	0
XLOC_000840	XLOC_000840	MIR556	TSS1014	chr1:162039580-162339813	0	0	0	0	0	0	0	0	0	0	0	0
XLOC_000841	XLOC_000841	C1orf226	TSS1015,TSS1016	chr1:162348695-162356608	0.973334	0.436101	1.51057	0.746911	0.337583	1.15624	1.28161	0.705075	1.85815	0.849582	0.397699	1.30147
XLOC_000842	XLOC_000842	UHMK1	TSS1017,TSS1018	chr1:162466963-162499419	7.1677	5.34492	8.99048	24.3286	18.4644	30.1928	41.2256	31.7376	50.7136	18.5828	14.0822	23.0834
XLOC_000843	XLOC_000843	UAP1	TSS1019	chr1:162531295-162569633	41.47	30.9721	51.9679	39.9291	29.731	50.1272	33.5905	24.9815	42.1996	49.3783	37.0384	61.7181
XLOC_000844	XLOC_000844	DDR2	TSS1020	chr1:162602227-162750247	0.123786	0	0.261129	0.105181	0	0.229297	0.12003	0	0.252253	0.101227	0	0.22359
XLOC_000845	XLOC_000845	HSD17B7	TSS1021	chr1:162760495-162782608	8.58871	5.52209	11.6553	7.52794	4.77281	10.2831	7.23475	4.554	9.91549	7.9055	5.05905	10.7519
XLOC_000846	XLOC_000846	RGS4	TSS1022,TSS1023,TSS1024,TSS1025	chr1:163038395-163046592	0.00666699	0	0.0780944	0	0	0	0.007519	0	0.0869227	0.0150408	0	0.0828019
XLOC_000847	XLOC_000847	NUF2	TSS1026	chr1:163291722-163325553	38.8885	28.7622	49.0149	17.1585	12.0969	22.2201	30.4188	22.2282	38.6095	40.6927	30.1353	51.25
XLOC_000848	XLOC_000848	PBX1	TSS1027	chr1:164528596-164821060	12.9274	9.65828	16.1966	10.998	8.17958	13.8165	14.8111	11.0716	18.5506	11.3787	8.42843	14.329
XLOC_000849	XLOC_000849	LRRC52	TSS1028	chr1:165446078-165551341	0	0	0	0	0	0	0	0	0	0	0	0
XLOC_000850	XLOC_000850	MGST3	TSS1029	chr1:165600109-165625372	33.8817	24.7699	42.9934	17.3957	12.1812	22.6101	47.2025	34.9705	59.4345	45.1834	33.4923	56.8746
XLOC_000851	XLOC_000851	LOC440700	TSS1030	chr1:165667986-165679199	0	0	0	0	0	0	0.0601518	0	0.20757	0	0	0
XLOC_000852	XLOC_000852	MIR3658,UCK2	TSS1031,TSS1032	chr1:165796731-165880855	17.8032	12.8588	22.7477	8.0243	5.07361	10.975	13.5553	9.50646	17.6041	22.5555	16.5776	28.5334
XLOC_000853	XLOC_000853	FMO9P	TSS1033	chr1:166573152-166594473	0	0	0	0	0	0	0	0	0	0	0	0
XLOC_000854	XLOC_000854	POGK	TSS1034	chr1:166808723-166823709	39.3705	29.6072	49.1339	29.4242	22.041	36.8074	36.2397	27.2533	45.226	36.0387	27.0745	45.0029
XLOC_000855	XLOC_000855	MAEL	TSS1035	chr1:166958518-166991447	0.0449876	0	0.149421	0.0287754	0	0.0953618	0.0301601	0	0.113437	0.0298983	0	0.119201
XLOC_000856	XLOC_000856	DUSP27	TSS1036	chr1:167064086-167098402	0	0	0	0	0	0	0.00643437	0	0.0370649	0.0236556	0	0.0704867
XLOC_000857	XLOC_000857	POU2F1	TSS1037,TSS1038	chr1:167190065-167396582	2.68523	1.96277	3.40769	2.77011	2.0213	3.51892	2.91087	2.13653	3.68521	2.21235	1.57283	2.85186
XLOC_000858	XLOC_000858	RCSD1	TSS1039	chr1:167599473-167675486	0.0155925	0	0.0667567	0.00902037	0	0.0479897	0.0240062	0	0.0803738	0.0536683	0	0.129717
XLOC_000859	XLOC_000859	MPZL1	TSS1040	chr1:167691186-167761156	28.8766	21.7884	35.9649	26.8936	20.3069	33.4803	22.8845	17.1881	28.5809	34.2378	25.9474	42.5281
XLOC_000860	XLOC_000860	DCAF6	TSS1041	chr1:167885912-168045083	16.852	9.88735	23.8167	29.4572	19.3779	39.5364	22.3188	14.0331	30.6044	18.2501	10.8687	25.6315
XLOC_000861	XLOC_000861	TIPRL	TSS1042	chr1:168148170-168171351	54.744	36.1774	73.3107	48.0722	31.4279	64.7166	56.027	37.5128	74.5412	73.4325	49.3083	97.5567
XLOC_000862	XLOC_000862	SFT2D2	TSS1043	chr1:168195254-168212088	23.9098	16.0693	31.7503	13.0734	8.47104	17.6759	21.8602	14.654	29.0664	13.6111	8.55114	18.671
XLOC_000863	XLOC_000863	TBX19	TSS1044	chr1:168250277-168283664	3.08656	1.88929	4.28382	2.32068	1.34958	3.29178	2.02949	1.13372	2.92526	2.22041	1.27125	3.16956
XLOC_000864	XLOC_000864	MIR557	TSS1045	chr1:168344761-168344859	0	0	0	0	0	0	0	0	0	0	0	0
XLOC_000865	XLOC_000865	XCL1	TSS1046	chr1:168545710-168551315	0.0391495	0	0.158827	0.0195845	0	0.104177	0	0	0	0.040015	0	0.160078
XLOC_000866	XLOC_000866	LINC00626	TSS1047	chr1:168756178-168762126	0.125963	0	0.355312	0.0323261	0	0.16144	0.0606688	0	0.241286	0	0	0
XLOC_000867	XLOC_000867	ATP1B1	TSS1048	chr1:169075946-169337186	61.9859	46.2602	77.7116	52.9708	38.7267	67.2148	52.8704	39.441	66.2998	72.532	54.0371	91.027
XLOC_000868	XLOC_000868	BLZF1	TSS1049	chr1:169337193-169396670	14.4735	10.3157	18.6314	15.1555	10.7913	19.5197	12.3661	8.69717	16.0351	12.7199	8.99795	16.4419
XLOC_000869	XLOC_000869	C1orf112	TSS1050	chr1:169764549-169863100	10.0298	6.97895	13.0807	8.91654	6.00956	11.8235	8.00308	5.32327	10.6829	8.49505	5.80415	11.186
XLOC_000870	XLOC_000870	METTL11B	TSS1051	chr1:170115187-170136923	0	0	0	0	0	0	0	0	0	0	0	0
XLOC_000871	XLOC_000871	GORAB	TSS1052	chr1:170501262-170522974	5.86213	3.98357	7.7407	5.33014	3.56522	7.09505	5.34035	3.60546	7.07524	5.43558	3.64488	7.22628
XLOC_000872	XLOC_000872	PRRX1	TSS1053	chr1:170633312-170708541	0.00579316	0	0.0404377	0	0	0	0	0	0	0	0	0
XLOC_000873	XLOC_000873	MROH9	TSS1054	chr1:170904611-171033906	0	0	0	0	0	0	0	0	0	0	0	0
XLOC_000874	XLOC_000874	FMO3	TSS1055	chr1:171060017-171086959	0.0855212	0	0.215665	0.0516544	0	0.164398	0.0967014	0	0.231868	0.0131829	0	0.0876148
XLOC_000875	XLOC_000875	MIR1295B	TSS1056	chr1:171060017-171086959	0	0	0	0	0	0	0	0	0	0	0	0
XLOC_000876	XLOC_000876	FMO6P	TSS1057	chr1:171106878-171130702	0	0	0	0	0	0	0	0	0	0	0	0
XLOC_000877	XLOC_000877	FMO2	TSS1058	chr1:171154387-171181822	0	0	0	0	0	0	0	0	0	0	0	0
XLOC_000878	XLOC_000878	FMO1	TSS1059	chr1:171217662-171255113	0	0	0	0	0	0	0.0115011	0	0.0645656	0	0	0
XLOC_000879	XLOC_000879	FMO4,TOP1P1	TSS1060,TSS1061	chr1:171283485-171311223	1.67869	0.823374	2.53401	0.947453	0.371486	1.52342	0.888691	0.350118	1.42726	0.584395	0.181022	0.987768
XLOC_000880	XLOC_000880	PRRC2C	TSS1062	chr1:171454665-171562650	43.0737	32.5946	53.5528	37.97	28.7364	47.2037	36.2339	27.3021	45.1657	34.252	25.6301	42.874
XLOC_000881	XLOC_000881	METTL13	TSS1063	chr1:171750760-171766856	27.0007	20.1985	33.8028	23.7308	17.75	29.7116	22.598	16.8328	28.3631	24.5516	18.2579	30.8453
XLOC_000882	XLOC_000882	DNM3	TSS1064	chr1:171810620-172381857	0.446562	0.231778	0.661345	0.980585	0.592257	1.36891	0.689606	0.396459	0.982752	0.677982	0.38248	0.973484
XLOC_000883	XLOC_000883	MIR3120	TSS1065	chr1:171810620-172381857	0	0	0	0	0	0	0	0	0	0	0	0
XLOC_000884	XLOC_000884	C1orf105	TSS1066	chr1:172389827-172437969	0.0319018	0	0.16253	0	0	0	0.0322484	0	0.161052	0	0	0
XLOC_000885	XLOC_000885	SUCO	TSS1067	chr1:172502259-172580973	7.11595	5.20334	9.02857	14.9231	11.1426	18.7036	11.52	8.57771	14.4622	14.1435	10.5843	17.7027
XLOC_000886	XLOC_000886	FASLG	TSS1068	chr1:172628184-172636012	0.0130548	0	0.0724317	0.0113457	0	0.0668542	0	0	0	0	0	0
XLOC_000887	XLOC_000887	PRDX6	TSS1069	chr1:173446485-173457946	271.916	206.06	337.771	314.648	238.514	390.782	264.642	200.883	328.4	357.911	272.316	443.507
XLOC_000888	XLOC_000888	LOC730159	TSS1070	chr1:173577474-173639001	0	0	0	0	0	0	0	0	0	0	0	0
XLOC_000889	XLOC_000889	KLHL20	TSS1071	chr1:173684079-173755840	6.47254	4.5691	8.37598	3.15738	2.06947	4.2453	4.09069	2.78318	5.39821	5.35403	3.72691	6.98115
XLOC_000890	XLOC_000890	DARS2	TSS1072	chr1:173793796-173827682	33.0833	24.865	41.3015	28.7037	21.5332	35.8741	27.5401	20.6407	34.4394	26.9895	20.1795	33.7996
XLOC_000891	XLOC_000891	GAS5-AS1	TSS1073	chr1:173832385-173837125	0.933626	0	3.08857	1.46108	0	4.56842	0.462391	0	2.33054	1.16144	0	5.08881
XLOC_000892	XLOC_000892	ZBTB37	TSS1074	chr1:173837492-173855774	1.20774	0.55151	1.86397	2.08263	1.15158	3.01368	1.54466	0.749059	2.34027	0.916774	0.362017	1.47153
XLOC_000893	XLOC_000893	RABGAP1L	TSS1075,TSS1076,TSS1077,TSS1078,TSS1079	chr1:174128551-174964445	6.41149	4.08891	8.73406	10.2915	6.79912	13.784	9.34325	5.82915	12.8574	6.6663	4.10703	9.22557
XLOC_000894	XLOC_000894	GPR52	TSS1080	chr1:174128551-174964445	0	0	0	0.0288305	0	0.308764	0	0	0	0	0	0
XLOC_000895	XLOC_000895	CACYBP	TSS1081,TSS1082	chr1:174968570-174981163	110.797	84.0774	137.517	133.219	101.02	165.419	82.8136	62.8211	102.806	115.635	87.4136	143.857
XLOC_000896	XLOC_000896	TNN	TSS1083	chr1:175036993-175117202	0.0132175	0	0.0429268	0.0219608	0	0.0638801	0.0258797	0	0.0721546	0.0161796	0	0.0534927
XLOC_000897	XLOC_000897	PAPPA2	TSS1084	chr1:176432306-176811970	0.0222888	0	0.0648142	0.00615547	0	0.0348052	0.00282562	0	0.0324717	0	0	0
XLOC_000898	XLOC_000898	FAM5B	TSS1085	chr1:177140632-177251558	0	0	0	0	0	0	0	0	0	0	0	0
XLOC_000899	XLOC_000899	RASAL2	TSS1086,TSS1087	chr1:178060642-178448648	8.66139	6.47376	10.849	7.5205	5.57995	9.46105	9.28573	6.93244	11.639	4.58272	3.35464	5.81079
XLOC_000900	XLOC_000900	TEX35	TSS1088	chr1:178482211-178492635	0	0	0	0	0	0	0	0	0	0	0	0
XLOC_000901	XLOC_000901	C1orf220	TSS1089	chr1:178511930-178518024	0.148235	0	0.297017	0.166439	0.0130972	0.319781	0.150561	0.00791164	0.29321	0.0950862	0	0.207396
XLOC_000902	XLOC_000902	MIR4424	TSS1090	chr1:178646883-178646969	0	0	0	0	0	0	0	0	0	0	0	0
XLOC_000903	XLOC_000903	RALGPS2	TSS1091	chr1:178694299-178889237	28.3835	21.4749	35.292	35.4522	26.8239	44.0806	34.9175	26.5415	43.2935	30.9038	23.347	38.4605
XLOC_000904	XLOC_000904	FAM20B	TSS1092	chr1:178995073-179045702	22.1483	16.6741	27.6225	27.2779	20.6235	33.9323	22.224	16.7307	27.7172	30.082	22.7318	37.4322
XLOC_000905	XLOC_000905	TOR3A	TSS1093	chr1:179051111-179065129	43.2938	32.3947	54.1928	43.9879	32.8866	55.0893	35.8391	26.7295	44.9487	46.1006	34.5384	57.6628
XLOC_000906	XLOC_000906	SOAT1	TSS1094	chr1:179262848-179327814	18.1036	13.6342	22.5731	14.3192	10.7066	17.9317	7.25218	5.35357	9.1508	12.1042	9.04574	15.1627
XLOC_000907	XLOC_000907	AXDND1	TSS1095,TSS1096	chr1:179334854-179545084	0.123469	0.00805087	0.238887	0.0518997	0	0.126093	0.0373428	0	0.101737	0.0380392	0	0.0998846
XLOC_000908	XLOC_000908	TDRD5	TSS1097,TSS1098,TSS1099	chr1:179560747-179660407	0.250585	0.0398355	0.461334	0.109725	0	0.252757	0.195078	0.0066731	0.383484	0.0939373	0	0.236649
XLOC_000909	XLOC_000909	FAM163A	TSS1100	chr1:179712297-179785333	0	0	0	0	0	0	0	0	0	0	0	0
XLOC_000910	XLOC_000910	TOR1AIP1	TSS1101	chr1:179851176-179889212	33.7192	25.5383	41.9001	24.7737	18.5396	31.0078	33.2503	25.0217	41.4788	27.7958	20.955	34.6366
XLOC_000911	XLOC_000911	CEP350	TSS1102	chr1:179923907-180084015	12.3843	9.36662	15.4019	9.37648	7.04911	11.7039	10.7231	8.08453	13.3617	9.87074	7.37667	12.3648
XLOC_000912	XLOC_000912	FLJ23867,QSOX1	TSS1103,TSS1104	chr1:180123967-180169859	235.708	175.958	295.459	181.376	136.749	226.003	211.27	158.707	263.832	247.578	185.215	309.941
XLOC_000913	XLOC_000913	LHX4	TSS1105	chr1:180199432-180244188	0	0	0	0.0139096	0	0.100341	0.0119331	0	0.0990069	0	0	0
XLOC_000914	XLOC_000914	XPR1	TSS1106	chr1:180601145-180859415	20.886	15.8636	25.9084	30.2293	22.8902	37.5685	19.4551	14.7503	24.1599	23.4534	17.7305	29.1763
XLOC_000915	XLOC_000915	KIAA1614	TSS1107	chr1:180882312-180915239	0.127146	0.00510303	0.24919	0.0500444	0	0.122192	0.0683104	0	0.144779	0.0132054	0	0.0502148
XLOC_000916	XLOC_000916	MR1	TSS1108	chr1:181002560-181031074	3.77846	2.69905	4.85786	1.74695	1.17851	2.3154	3.48706	2.48184	4.49228	2.66897	1.8722	3.46574
XLOC_000917	XLOC_000917	IER5	TSS1109	chr1:181057637-181059979	20.1567	14.6889	25.6245	14.0632	10.0282	18.0982	18.7643	13.6131	23.9155	23.614	17.367	29.8611
XLOC_000918	XLOC_000918	GM140	TSS1110	chr1:181205523-181207740	0	0	0	0	0	0	0	0	0	0	0	0
XLOC_000919	XLOC_000919	CACNA1E	TSS1111	chr1:181452685-181775921	0	0	0	0.0016032	0	0.0174057	0	0	0	0	0	0
XLOC_000920	XLOC_000920	LINC00272	TSS1112	chr1:182376755-182383948	0	0	0	0	0	0	0	0	0	0	0	0
XLOC_000921	XLOC_000921	RGSL1	TSS1113	chr1:182419255-182529732	0	0	0	0	0	0	0	0	0	0	0	0
XLOC_000922	XLOC_000922	LOC284648	TSS1114	chr1:182584274-182585764	0.0167329	0	0.0917976	0.0164777	0	0.090934	0.0159183	0	0.0956005	0	0	0
XLOC_000923	XLOC_000923	NPL	TSS1115	chr1:182758583-182799519	0.337552	0.0524156	0.622689	0.179578	0	0.389771	0.563347	0.161071	0.965623	0.133654	0	0.345723
XLOC_000924	XLOC_000924	DHX9	TSS1116	chr1:182808438-182857117	77.5784	59.0892	96.0675	78.3675	59.4832	97.2518	65.4795	49.7096	81.2494	72.1887	54.8839	89.4935
XLOC_000925	XLOC_000925	LAMC1	TSS1117	chr1:182992594-183114727	78.0458	58.9705	97.1212	104.66	78.7405	130.579	95.1628	71.7218	118.604	82.4999	62.2724	102.728
XLOC_000926	XLOC_000926	LAMC2	TSS1118	chr1:183155173-183214262	39.1202	29.6323	48.6081	20.0949	14.8833	25.3066	32.12	24.2155	40.0245	34.7049	26.1969	43.213
XLOC_000927	XLOC_000927	SMG7	TSS1119	chr1:183441505-183523328	45.5645	34.4436	56.6853	48.1633	36.4324	59.8942	41.4644	31.2958	51.6331	42.4328	32.0291	52.8365
XLOC_000928	XLOC_000928	RGL1	TSS1120	chr1:183605207-183897666	5.09703	3.58835	6.60571	1.71404	1.07118	2.3569	3.15421	2.12871	4.17971	1.56684	0.960922	2.17276
XLOC_000929	XLOC_000929	TSEN15	TSS1121	chr1:184020810-184043344	35.2989	26.2503	44.3475	36.8957	27.2519	46.5395	45.1589	33.6926	56.6252	46.9913	35.149	58.8337
XLOC_000930	XLOC_000930	C1orf21	TSS1122	chr1:184356149-184598155	4.39077	3.22051	5.56104	5.18715	3.81233	6.56197	6.46656	4.80686	8.12625	4.3068	3.15294	5.46065
XLOC_000931	XLOC_000931	RNF2	TSS1123	chr1:185014550-185071740	17.9638	13.3605	22.5671	13.0665	9.5313	16.6017	19.3179	14.4274	24.2084	11.4924	8.37591	14.6088
XLOC_000932	XLOC_000932	SWT1	TSS1124	chr1:185087217-185260913	2.60594	0.695576	4.5163	3.05391	0.695485	5.41233	3.17804	0.925556	5.43052	2.5266	0.644985	4.40822
XLOC_000933	XLOC_000933	HMCN1	TSS1125	chr1:185703682-186446655	0.0954575	0	0.525655	0.0630082	0	0.411699	0.17816	0	0.71392	0.0511772	0	0.337738
XLOC_000934	XLOC_000934	PRG4	TSS1126	chr1:185703682-186446655	0.0111934	0	0.295657	0	0	0	0	0	0	0.012717	0	0.304721
XLOC_000935	XLOC_000935	C1orf27	TSS1127	chr1:185703682-186446655	15.9246	4.2551	27.5942	16.2412	3.77127	28.7111	15.3699	4.89853	25.8413	17.1817	6.25183	28.1116
XLOC_000936	XLOC_000936	OCLM	TSS1128	chr1:185703682-186446655	0.452018	0	4.96142	0.725671	0	6.38856	0.484581	0	4.91405	0.623099	0	5.58682
XLOC_000937	XLOC_000937	PLA2G4A	TSS1129	chr1:186798031-186958113	0.295453	0.0601638	0.530743	0.444167	0.127756	0.760577	0.383786	0.102138	0.665434	0.334539	0.0826111	0.586467
XLOC_000938	XLOC_000938	LOC440704	TSS1130	chr1:190594019-190770788	0	0	0	0	0	0	0	0	0	0	0	0
XLOC_000939	XLOC_000939	RGS18	TSS1131	chr1:192127591-192154945	0	0	0	0	0	0	0	0	0	0	0	0
XLOC_000940	XLOC_000940	RGS21	TSS1132	chr1:192286121-192336414	0	0	0	0	0	0	0	0	0	0	0	0
XLOC_000941	XLOC_000941	RGS1	TSS1133	chr1:192544856-192549159	0.0203859	0	0.105402	0	0	0	0	0	0	0	0	0
XLOC_000942	XLOC_000942	RGS13	TSS1134	chr1:192605267-192629440	0	0	0	0	0	0	0	0	0	0	0	0
XLOC_000943	XLOC_000943	RGS2	TSS1135	chr1:192778168-192781407	1.77559	0.746136	2.80505	5.77372	3.39964	8.14781	3.35167	1.72561	4.97773	5.79998	3.4518	8.14816
XLOC_000944	XLOC_000944	TROVE2	TSS1136,TSS1137	chr1:192981495-193060906	16.6496	8.28262	25.0165	20.0998	10.0977	30.102	16.8579	8.11542	25.6004	18.0039	7.81169	28.1961
XLOC_000945	XLOC_000945	CDC73	TSS1138	chr1:193091087-193223942	18.8853	14.3459	23.4247	22.6372	17.0635	28.211	18.6329	14.1038	23.1621	13.7951	10.3057	17.2845
XLOC_000946	XLOC_000946	MIR1278	TSS1139	chr1:193091087-193223942	0	0	0	0	0	0	0	0	0	0	0	0
XLOC_000947	XLOC_000947	CFH	TSS1140	chr1:196621007-196716634	2.25759	1.06692	3.44827	3.17049	1.72171	4.61927	3.8164	2.23588	5.39693	2.24291	1.15681	3.32901
XLOC_000948	XLOC_000948	CFHR3	TSS1141	chr1:196743929-196763203	0.0357366	0	0.159031	0.0283896	0	0.14721	0.0647401	0	0.195578	0.0219407	0	0.130924
XLOC_000949	XLOC_000949	CFHR1	TSS1142	chr1:196788860-196801319	0	0	0	0.0202677	0	0.109049	0.0557698	0	0.193602	0	0	0
XLOC_000950	XLOC_000950	CFHR4	TSS1143	chr1:196857143-196887843	0	0	0	0	0	0	0.0167079	0	0.120597	0.0396503	0	0.160513
XLOC_000951	XLOC_000951	CFHR2	TSS1144	chr1:196912933-196928356	0	0	0	0	0	0	0	0	0	0	0	0
XLOC_000952	XLOC_000952	CFHR5	TSS1145	chr1:196946666-196978803	0	0	0	0	0	0	0	0	0	0	0	0
XLOC_000953	XLOC_000953	CRB1	TSS1146,TSS1147	chr1:197170591-197447585	0.0187514	0	0.101439	0.021331	0	0.112829	0.00696651	0	0.0979391	0.0258764	0	0.117026
XLOC_000954	XLOC_000954	C1orf53	TSS1148	chr1:197871681-197876497	8.12612	4.19222	12.06	8.28161	4.57018	11.993	6.73589	3.30217	10.1696	7.85726	4.21653	11.498
XLOC_000955	XLOC_000955	LHX9	TSS1149,TSS1150	chr1:197881634-197899273	0.161288	0	0.337514	0.305375	0.0539275	0.556822	0.244599	0.0228484	0.466349	0.134609	0	0.296265
XLOC_000956	XLOC_000956	NEK7	TSS1151	chr1:198126107-198291548	16.6276	12.4114	20.8437	18.4076	13.752	23.0633	29.5557	22.3939	36.7175	29.8677	22.4437	37.2917
XLOC_000957	XLOC_000957	PTPRC	TSS1152	chr1:198608097-198726605	0.0334392	0	0.164267	0.0513836	0	0.188595	0.0240956	0	0.153535	0.0355351	0	0.167349
XLOC_000958	XLOC_000958	NR5A2	TSS1153,TSS1154	chr1:199996729-200146550	0.0307514	0	0.0844572	0.0100698	0	0.0565831	0.0159987	0	0.0547779	0.0147534	0	0.0536619
XLOC_000959	XLOC_000959	CAMSAP2	TSS1155	chr1:200708685-200829831	11.8853	8.89719	14.8735	12.4347	9.28657	15.5829	19.8582	14.9918	24.7246	20.2218	15.2222	25.2213
XLOC_000960	XLOC_000960	GPR25	TSS1156	chr1:200842082-200843306	0	0	0	0	0	0	0	0	0	0	0	0
XLOC_000961	XLOC_000961	C1orf106	TSS1157,TSS1158	chr1:200860626-200884864	9.52193	6.88123	12.1626	9.40397	6.8242	11.9837	11.5501	8.45033	14.6499	5.7912	4.0468	7.5356
XLOC_000962	XLOC_000962	IGFN1	TSS1159	chr1:201159952-201198080	0	0	0	0.0210385	0	0.0455519	0.0182754	0	0.0412456	0.0222986	0	0.0496604
XLOC_000963	XLOC_000963	PKP1	TSS1160	chr1:201252579-201302121	0.09035	0.00665189	0.174048	0.0117858	0	0.0431359	0.188657	0.0552972	0.322017	0.159547	0.0353399	0.283753
XLOC_000964	XLOC_000964	RPS10P7	TSS1161	chr1:201489031-201489720	5.56743	2.2855	8.84936	5.41466	2.21868	8.61065	5.5221	2.29564	8.74857	7.32095	3.3173	11.3246
XLOC_000965	XLOC_000965	NAV1	TSS1162,TSS1163	chr1:201617449-201796102	0.30886	0.158811	0.458909	0.252407	0.126016	0.378797	0.26189	0.12858	0.395199	0.209013	0.0934279	0.324598
XLOC_000966	XLOC_000966	MIR5191	TSS1164	chr1:201617449-201796102	0	0	0	0	0	0	0	0	0	0	0	0
XLOC_000967	XLOC_000967	MIR1231	TSS1165	chr1:201617449-201796102	0	0	0	0	0	0	0	0	0	0	0	0
XLOC_000968	XLOC_000968	IPO9	TSS1166	chr1:201798287-201853422	21.1038	15.9812	26.2263	23.5103	17.8093	29.2113	22.1039	16.738	27.4697	22.9085	17.383	28.434
XLOC_000969	XLOC_000969	SHISA4	TSS1167	chr1:201857796-201861715	22.7405	16.6444	28.8367	15.6271	11.2511	20.0031	17.2456	12.4043	22.087	19.3225	13.932	24.7131
XLOC_000970	XLOC_000970	TIMM17A	TSS1168	chr1:201924618-201939789	95.7739	72.2443	119.303	89.3118	67.1955	111.428	93.6162	70.7863	116.446	112.303	84.9319	139.674
XLOC_000971	XLOC_000971	RNPEP	TSS1169	chr1:201951765-201975275	34.6912	25.7339	43.6486	32.1987	23.9089	40.4884	39.8301	29.7954	49.8648	36.9282	27.5155	46.3409
XLOC_000972	XLOC_000972	ELF3	TSS1170	chr1:201979689-201986315	43.6061	32.8984	54.3138	37.333	28.0166	46.6494	54.4995	41.1532	67.8458	48.3638	36.4016	60.3259
XLOC_000973	XLOC_000973	GPR37L1	TSS1171	chr1:202092028-202098634	0.174401	0.00363789	0.345164	0.0377439	0	0.105567	0.130228	0	0.262883	0.0852283	0	0.192334
XLOC_000974	XLOC_000974	PTPRVP	TSS1172	chr1:202137178-202158577	0	0	0	0	0	0	0.00545485	0	0.0318045	0	0	0
XLOC_000975	XLOC_000975	LGR6	TSS1173,TSS1174,TSS1175	chr1:202163117-202288889	0.25721	0.0522406	0.46218	0.0607998	0	0.159134	0.0948461	0	0.219317	0.135701	0	0.281764
XLOC_000976	XLOC_000976	PPP1R12B	TSS1176,TSS1177,TSS1178	chr1:202317829-202557697	6.34828	3.88788	8.80869	7.9447	4.78585	11.1036	6.61949	4.31306	8.92592	8.19104	4.89737	11.4847
XLOC_000977	XLOC_000977	KDM5B-AS1	TSS1179	chr1:202780073-202781041	10.142	5.9971	14.2869	9.17728	5.00422	13.3503	7.85394	4.20879	11.4991	10.5916	6.23538	14.9479
XLOC_000978	XLOC_000978	LOC641515	TSS1180	chr1:202794328-202795421	0	0	0	0	0	0	0.0242782	0	0.13155	0.0837259	0	0.25077
XLOC_000979	XLOC_000979	LOC148709	TSS1181	chr1:202830881-202844369	1.04139	0.457277	1.6255	0.993424	0.421404	1.56544	1.00623	0.430913	1.58155	0.854475	0.334285	1.37466
XLOC_000980	XLOC_000980	TMEM183A	TSS1182	chr1:202976533-202993197	35.4512	26.3239	44.5784	44.6688	33.2774	56.0601	40.2833	29.9541	50.6125	25.3507	18.5835	32.1179
XLOC_000981	XLOC_000981	PPFIA4	TSS1183	chr1:203020310-203047864	0.631443	0.316426	0.946461	0.780059	0.419025	1.14109	0.537313	0.255193	0.819434	0.710105	0.364314	1.0559
XLOC_000982	XLOC_000982	ADORA1	TSS1184	chr1:203096835-203136533	6.18214	4.22788	8.1364	6.0498	4.14301	7.9566	12.2972	8.94005	15.6544	12.7568	9.15598	16.3576
XLOC_000983	XLOC_000983	BTG2	TSS1185	chr1:203274663-203278729	11.7202	8.41642	15.024	7.29833	5.07728	9.51939	10.3152	7.36568	13.2648	13.5336	9.79603	17.2713
XLOC_000984	XLOC_000984	PRELP	TSS1186	chr1:203444882-203460479	0.0111841	0	0.0367608	0.0160426	0	0.0496498	0.00729859	0	0.0339387	0.0042635	0	0.0314244
XLOC_000985	XLOC_000985	OPTC	TSS1187	chr1:203463270-203478077	0	0	0	0	0	0	0.0184119	0	0.0996796	0	0	0
XLOC_000986	XLOC_000986	ATP2B4	TSS1188	chr1:203595914-203713209	19.549	14.6942	24.4038	21.1897	15.9438	26.4356	21.1935	15.963	26.424	22.8621	16.9774	28.7468
XLOC_000987	XLOC_000987	SNORA77	TSS1189	chr1:203595914-203713209	0	0	0	5.80617	0	13.5296	8.03584	0	16.7104	0	0	0
XLOC_000988	XLOC_000988	LINC00260	TSS1190	chr1:203595914-203713209	0.493997	0	2.76099	0.591157	0	3.33706	0.308452	0	2.19113	0.684367	0	3.89929
XLOC_000989	XLOC_000989	LAX1	TSS1191	chr1:203734283-203745480	0.0170064	0	0.0771432	0.0233199	0	0.0835776	0.0151619	0	0.0767142	0.0434154	0	0.12217
XLOC_000990	XLOC_000990	ZC3H11A	TSS1192	chr1:203764750-203823256	34.5355	25.6425	43.4286	28.5221	21.1487	35.8954	30.6414	22.7505	38.5323	31.9411	23.7295	40.1528
XLOC_000991	XLOC_000991	ZBED6	TSS1193	chr1:203764750-203823256	10.0011	2.71881	17.2834	7.04707	1.39735	12.6968	8.26542	2.21932	14.3115	6.95865	1.3191	12.5982
XLOC_000992	XLOC_000992	SNRPE	TSS1194	chr1:203830739-203840280	55.7777	41.9735	69.5818	72.1822	54.4479	89.9166	43.1686	32.8154	53.5218	74.1114	55.8452	92.3777
XLOC_000993	XLOC_000993	SOX13	TSS1195	chr1:204042245-204096871	17.0627	12.6758	21.4496	20.3027	15.1648	25.4406	16.6354	12.3644	20.9064	15.1374	11.1665	19.1082
XLOC_000994	XLOC_000994	MDM4	TSS1196	chr1:204485506-204527248	2.5539	1.79988	3.30792	3.58798	2.56419	4.61177	2.95397	2.11473	3.79322	3.12396	2.20949	4.03843
XLOC_000995	XLOC_000995	NFASC	TSS1197,TSS1198	chr1:204797781-204991950	0.0159008	0	0.0963445	0.0424223	0	0.133511	0.0300748	0	0.121771	0.0241149	0	0.116265
XLOC_000996	XLOC_000996	CNTN2	TSS1199	chr1:205012339-205047171	0	0	0	0	0	0	0.00296166	0	0.018137	0	0	0
XLOC_000997	XLOC_000997	TMCC2	TSS1200,TSS1201	chr1:205197037-205242471	0.583526	0.259155	0.907897	0.593192	0.274833	0.911551	1.0044	0.542599	1.4662	0.52471	0.201077	0.848343
XLOC_000998	XLOC_000998	LEMD1-AS1	TSS1202	chr1:205342379-205391214	0	0	0	0	0	0	0	0	0	0	0	0
XLOC_000999	XLOC_000999	CDK18	TSS1203	chr1:205473683-205501921	8.74024	6.21361	11.2669	6.28011	4.34531	8.21491	11.2697	8.17008	14.3694	9.76684	6.97142	12.5622
XLOC_001000	XLOC_001000	MFSD4	TSS1204	chr1:205538111-205572046	0.121935	0.0104197	0.233451	0.0805178	0	0.169928	0.0747225	0	0.156935	0.0895461	0	0.184807
XLOC_001001	XLOC_001001	LOC284581	TSS1205	chr1:205831206-205865215	1.77031	0.967596	2.57303	2.41347	1.41159	3.41536	0.698441	0.276919	1.11996	3.94962	2.52894	5.3703
XLOC_001002	XLOC_001002	FAM72A	TSS1206	chr1:206138910-206155074	2.06557	1.096	3.03514	2.42305	1.29549	3.55061	1.73668	0.874713	2.59865	1.33316	0.614917	2.0514
XLOC_001003	XLOC_001003	AVPR1B	TSS1207	chr1:206224282-206231482	0.107149	0	0.263565	0.0454629	0	0.147613	0.0306773	0	0.106311	0.223088	0	0.472887
XLOC_001004	XLOC_001004	CTSE	TSS1208	chr1:206317458-206332104	0.189968	0	0.384311	0.343762	0.0851363	0.602387	0.298813	0.061971	0.535655	0.469517	0.144723	0.794312
XLOC_001005	XLOC_001005	SRGAP2,SRGAP2C,SRGAP2D	TSS1209,TSS1210	chr1:206516199-206637783	7.8841	5.39759	10.3706	10.5999	5.76967	15.4302	7.54906	4.88843	10.2097	8.96474	5.79926	12.1302
XLOC_001006	XLOC_001006	IKBKE	TSS1211	chr1:206643585-206670223	2.88209	1.80884	3.95535	1.02017	0.53742	1.50291	2.97495	1.91293	4.03697	2.24442	1.37921	3.10963
XLOC_001007	XLOC_001007	RASSF5	TSS1212,TSS1213	chr1:206680878-206762616	0.140658	0.00114852	0.280168	0.139865	0.00971665	0.270014	0.213336	0.0370583	0.389614	0.106812	0	0.228839
XLOC_001008	XLOC_001008	DYRK3	TSS1214	chr1:206808880-206822542	1.6783	0.844271	2.51233	2.03917	1.11468	2.96365	1.54982	0.775252	2.32439	2.08564	1.12947	3.04182
XLOC_001009	XLOC_001009	MAPKAPK2	TSS1215	chr1:206858364-206907630	17.6666	13.0412	22.2921	21.1854	15.776	26.5947	38.8344	29.2393	48.4296	18.1035	13.3403	22.8666
XLOC_001010	XLOC_001010	IL19	TSS1216,TSS1217	chr1:206972214-207016326	0.025134	0	0.152243	0	0	0	0.0245347	0	0.152195	0.0283733	0	0.160752
XLOC_001011	XLOC_001011	IL20	TSS1218	chr1:207039153-207042568	0	0	0	0	0	0	0.0117422	0	0.0863747	0.0224072	0	0.110869
XLOC_001012	XLOC_001012	IL24	TSS1219	chr1:207070787-207095378	0.016004	0	0.15491	0.040269	0	0.190152	0.0711115	0	0.249392	0.0149821	0	0.132588
XLOC_001013	XLOC_001013	PFKFB2	TSS1220	chr1:207226619-207254368	4.7828	3.31431	6.25128	4.34235	3.00137	5.68333	7.71691	5.56208	9.87173	7.38921	5.26409	9.51433
XLOC_001014	XLOC_001014	C4BPB	TSS1221,TSS1222	chr1:207262211-207273337	0	0	0	0	0	0	0	0	0	0.0884491	0	0.376703
XLOC_001015	XLOC_001015	C4BPA	TSS1223	chr1:207277606-207318317	0	0	0	0.0233446	0	0.0958079	0	0	0	0	0	0
XLOC_001016	XLOC_001016	CD55	TSS1224	chr1:207494816-207534311	8.70856	6.14989	11.2672	11.6963	8.33048	15.0622	9.39695	6.68397	12.1099	19.219	14.1191	24.3189
XLOC_001017	XLOC_001017	CR2	TSS1225	chr1:207627644-207663240	0.0247307	0	0.0790284	0.0175316	0	0.0641996	0.0166541	0	0.0650905	0.0319768	0	0.0925465
XLOC_001018	XLOC_001018	CR1	TSS1226	chr1:207669472-207815110	0	0	0	0	0	0	0.00272139	0	0.0199279	0	0	0
XLOC_001019	XLOC_001019	CR1L	TSS1227	chr1:207818457-207897036	0.0787972	0	0.202265	0.263986	0.0148931	0.51308	0.326892	0.0343971	0.619387	0.0942829	0	0.248353
XLOC_001020	XLOC_001020	CD46	TSS1228	chr1:207925382-207968861	15.4517	11.3626	19.5409	34.7938	26.1834	43.4042	36.6354	27.8745	45.3962	43.446	32.77	54.122
XLOC_001021	XLOC_001021	LOC148696	TSS1229	chr1:207991723-207995941	0	0	0	0	0	0	0	0	0	0	0	0
XLOC_001022	XLOC_001022	MIR205,MIR205HG	TSS1230,TSS1231	chr1:209602167-209605892	0.272672	0	1.32532	0.119028	0	1.13831	0.474002	0	1.58191	0.166694	0	1.19558
XLOC_001023	XLOC_001023	CAMK1G	TSS1232	chr1:209757044-209787284	0	0	0	0	0	0	0.0102459	0	0.0566758	0.0653743	0	0.166838
XLOC_001024	XLOC_001024	G0S2	TSS1233	chr1:209848669-209849735	1.50497	0.423551	2.58638	0.743726	0.0485066	1.43895	1.38779	0.395365	2.38022	4.00453	1.96388	6.04518
XLOC_001025	XLOC_001025	HSD11B1	TSS1234,TSS1235	chr1:209859524-209908295	0.045102	0	0.222092	0	0	0	0.0189357	0	0.161489	0.0223653	0	0.171496
XLOC_001026	XLOC_001026	TRAF3IP3	TSS1236	chr1:209929393-209957890	0.261837	0	0.624697	0.315966	0	0.719748	0.245438	0	0.578306	0.299684	0	0.667253
XLOC_001027	XLOC_001027	DIEXF	TSS1237	chr1:210001311-210030910	3.6285	2.59605	4.66095	3.35939	2.38623	4.33255	3.68873	2.63755	4.7399	4.50459	3.26549	5.74369
XLOC_001028	XLOC_001028	SYT14	TSS1238	chr1:210111518-210337633	2.06378	1.37018	2.75738	1.80786	1.14744	2.46829	2.22853	1.47515	2.98191	2.40083	1.58516	3.21649
XLOC_001029	XLOC_001029	SERTAD4	TSS1239	chr1:210404803-210416440	4.02292	2.36982	5.67601	2.593	1.34919	3.8368	5.15965	3.10573	7.21356	5.27251	3.20561	7.33941
XLOC_001030	XLOC_001030	HHAT	TSS1240,TSS1241,TSS1242	chr1:210501595-210849638	0.53846	0.218327	0.858593	0.328303	0.0802533	0.576353	0.829715	0.392618	1.26681	0.352125	0.108018	0.596233
XLOC_001031	XLOC_001031	RCOR3	TSS1243,TSS1244	chr1:211432707-211489725	8.94751	5.97461	11.9204	8.22102	5.55783	10.8842	9.52845	6.59525	12.4616	8.07503	5.33211	10.818
XLOC_001032	XLOC_001032	TRAF5	TSS1245,TSS1246,TSS1247	chr1:211499956-211548286	0.559872	0.249694	0.87005	0.481946	0.197536	0.766356	1.27523	0.711476	1.83898	0.41764	0.160004	0.675276
XLOC_001033	XLOC_001033	LINC00467	TSS1248	chr1:211556096-211605877	5.37433	3.1586	7.59005	6.21796	3.78036	8.65557	3.867	2.20082	5.53317	3.01492	1.69062	4.33922
XLOC_001034	XLOC_001034	DTL	TSS1249	chr1:212113740-212278187	5.3393	3.14513	7.53348	8.38507	5.54585	11.2243	6.52331	4.22145	8.82518	5.49537	3.42963	7.5611
XLOC_001035	XLOC_001035	MIR3122	TSS1250	chr1:212113740-212278187	0	0	0	0	0	0	0	0	0	0	0	0
XLOC_001036	XLOC_001036	PPP2R5A	TSS1251,TSS1252	chr1:212458878-212535205	22.6669	16.9037	28.4302	40.162	30.4713	49.8526	32.9122	24.8119	41.0126	36.3745	27.4236	45.3254
XLOC_001037	XLOC_001037	SNORA16B	TSS1253	chr1:212458878-212535205	0	0	0	0	0	0	0	0	0	0	0	0
XLOC_001038	XLOC_001038	NENF	TSS1254	chr1:212606228-212619721	18.6158	12.4741	24.7575	22.7419	15.7093	29.7744	16.6737	11.191	22.1564	23.3481	16.085	30.6113
XLOC_001039	XLOC_001039	ATF3	TSS1255,TSS1256,TSS1257	chr1:212738675-212794119	9.91779	6.89642	12.9392	5.1974	3.38001	7.0148	7.1304	4.8165	9.4443	14.0172	9.95526	18.0792
XLOC_001040	XLOC_001040	FAM71A	TSS1258	chr1:212797788-212800120	0	0	0	0.00908272	0	0.0532154	0	0	0	0.0213069	0	0.0887298
XLOC_001041	XLOC_001041	TATDN3	TSS1259	chr1:212965169-212990167	2.08736	1.21206	2.96266	2.87106	1.73859	4.00353	2.58737	1.55019	3.62456	2.28043	1.32522	3.23563
XLOC_001042	XLOC_001042	FLVCR1	TSS1260	chr1:213031596-213072705	2.21681	1.47967	2.95395	1.77082	1.14732	2.39431	1.38276	0.868018	1.89751	3.18268	2.20153	4.16383
XLOC_001043	XLOC_001043	VASH2	TSS1261	chr1:213123886-213164927	0.643691	0.301339	0.986044	0.567064	0.240154	0.893974	0.335154	0.11414	0.556169	0.236359	0.0614079	0.411311
XLOC_001044	XLOC_001044	RPS6KC1	TSS1262	chr1:213224587-213446808	3.14816	2.09113	4.20519	6.32494	4.49581	8.15408	6.31678	4.47721	8.15636	5.23259	3.68114	6.78404
XLOC_001045	XLOC_001045	LINC00538	TSS1263	chr1:214098091-214099996	0	0	0	0	0	0	0	0	0	0	0	0
XLOC_001046	XLOC_001046	PROX1	TSS1264,TSS1265	chr1:214161277-214214847	0.00278385	0	0.0209415	0	0	0	0.00276599	0	0.0211822	0.00249667	0	0.0195537
XLOC_001047	XLOC_001047	SMYD2	TSS1266	chr1:214454564-214510477	13.7418	9.53961	17.9439	9.05626	6.04604	12.0665	13.7079	9.50693	17.9088	8.34027	5.53463	11.1459
XLOC_001048	XLOC_001048	CENPF	TSS1267	chr1:214776531-214837914	28.0993	21.2805	34.9182	28.3227	21.4287	35.2166	21.0456	15.8286	26.2625	16.2924	12.137	20.4479
XLOC_001049	XLOC_001049	KCNK2	TSS1268,TSS1269	chr1:215178884-215410436	0.0305445	0	0.107653	0.0296185	0	0.105505	0.0809289	0	0.194396	0.0576309	0	0.156766
XLOC_001050	XLOC_001050	KCTD3	TSS1270	chr1:215740734-215795149	17.1235	12.6503	21.5967	16.3429	12.0067	20.6791	17.8615	13.2089	22.514	14.0337	10.2794	17.7879
XLOC_001051	XLOC_001051	SPATA17	TSS1271	chr1:217804694-218040484	0.508709	0.0832948	0.934124	0.584911	0.105089	1.06473	0.263499	0	0.544211	0.210192	0	0.475996
XLOC_001052	XLOC_001052	LINC00210	TSS1272	chr1:218066241-218094146	0	0	0	0	0	0	0	0	0	0	0	0
XLOC_001053	XLOC_001053	RRP15	TSS1273	chr1:218458628-218511325	2.89743	2.0603	3.73456	3.25892	2.29313	4.22471	2.98199	2.12635	3.83764	3.28593	2.32469	4.24718
XLOC_001054	XLOC_001054	TGFB2	TSS1274	chr1:218517537-218617961	1.43827	0.930997	1.94554	0.725605	0.396555	1.05465	2.50271	1.71517	3.29025	1.66643	1.08331	2.24955
XLOC_001055	XLOC_001055	LYPLAL1	TSS1275	chr1:219347191-219386207	0.0151418	0	0.0782317	0.0317881	0	0.122905	0.0101231	0	0.0667471	0.0322939	0	0.117937
XLOC_001056	XLOC_001056	RNU5F-1	TSS1276	chr1:220046618-220321383	0	0	0	0	0	0	0	0	0	0	0	0
XLOC_001057	XLOC_001057	IARS2	TSS1277	chr1:220046618-220321383	35.5508	19.6435	51.4582	41.6909	24.7592	58.6226	39.3566	22.5552	56.158	37.8322	20.2998	55.3646
XLOC_001058	XLOC_001058	MARK1	TSS1278	chr1:220701567-220837799	0	0	0	0.00366596	0	0.0223367	0.00590997	0	0.0241063	0.00876975	0	0.0345516
XLOC_001059	XLOC_001059	C1orf115	TSS1279	chr1:220863627-220872499	0.454666	0.160003	0.749329	0.319586	0.0910597	0.548113	0.668352	0.285694	1.05101	0.261306	0.0592169	0.463396
XLOC_001060	XLOC_001060	2018-03-02	TSS1280	chr1:220921675-220957596	4.2774	2.50301	6.05179	2.95381	1.62745	4.28018	5.02957	3.08325	6.97589	3.01973	1.64694	4.39253
XLOC_001061	XLOC_001061	2018-03-01	TSS1281	chr1:220960038-220987741	1.09787	0.47141	1.72432	1.39033	0.669804	2.11085	1.56999	0.781622	2.35836	2.67711	1.50617	3.84805
XLOC_001062	XLOC_001062	HLX	TSS1282	chr1:221052742-221058400	0	0	0	0.0274436	0	0.0910999	0.0576897	0	0.156277	0	0	0
XLOC_001063	XLOC_001063	MIA3	TSS1283	chr1:222791443-222841351	5.88755	4.30595	7.46916	6.71297	4.91969	8.50626	5.80443	4.23659	7.37228	7.20434	5.31053	9.09815
XLOC_001064	XLOC_001064	BROX	TSS1284	chr1:222885905-222906106	13.2114	9.23978	17.183	16.7291	11.8706	21.5876	15.896	11.3456	20.4464	14.3294	10.0385	18.6202
XLOC_001065	XLOC_001065	FAM177B	TSS1285	chr1:222910557-222924002	0	0	0	0	0	0	0	0	0	0.0419814	0	0.168277
XLOC_001066	XLOC_001066	DISP1	TSS1286	chr1:222988430-223179337	0.68272	0.353711	1.01173	0.596262	0.296526	0.895998	0.513682	0.243468	0.783896	0.651941	0.333688	0.970193
XLOC_001067	XLOC_001067	C1orf65	TSS1287	chr1:223566714-223568812	0.0309824	0	0.121687	0.0129481	0	0.0684421	0.0353837	0	0.116951	0.0464851	0	0.136391
XLOC_001068	XLOC_001068	CAPN2	TSS1288,TSS1289	chr1:223889294-223963720	79.1171	59.5934	98.6409	72.2752	54.6784	89.8721	119.393	90.4567	148.328	102.53	77.5823	127.478
XLOC_001069	XLOC_001069	FBXO28	TSS1290	chr1:224301788-224349749	11.7728	8.75455	14.7911	9.2906	6.81366	11.7675	6.60487	4.77737	8.43236	9.13203	6.68364	11.5804
XLOC_001070	XLOC_001070	DEGS1	TSS1291	chr1:224370909-224381142	159.269	120.823	197.715	75.7414	56.9444	94.5384	133.888	101.436	166.34	107.044	80.9204	133.168
XLOC_001071	XLOC_001071	CNIH4	TSS1292	chr1:224544594-224563695	56.1275	41.2112	71.0437	50.9828	36.4766	65.489	59.8045	43.8557	75.7533	61.6227	45.3359	77.9094
XLOC_001072	XLOC_001072	CNIH3	TSS1293	chr1:224804178-224928249	0.0222838	0	0.085092	0.0697558	0	0.167046	0.0290369	0	0.103049	0.020846	0	0.0823058
XLOC_001073	XLOC_001073	DNAH14	TSS1294	chr1:225117355-225586996	5.80497	3.52667	8.08326	5.92037	3.63837	8.20237	9.55888	6.32435	12.7934	7.42353	4.76188	10.0852
XLOC_001074	XLOC_001074	SRP9	TSS1295	chr1:225965514-225978168	85.2151	64.5588	105.871	98.1775	74.6261	121.729	77.9683	59.2681	96.6685	93.9331	71.1537	116.713
XLOC_001075	XLOC_001075	EPHX1	TSS1296,TSS1297	chr1:225997796-226070420	54.8147	39.3662	70.2632	60.3909	43.5352	77.2467	54.7756	39.4717	70.0795	52.3309	37.4531	67.2087
XLOC_001076	XLOC_001076	H3F3A	TSS1298	chr1:226250407-226259703	54.94	40.5717	69.3084	74.4368	56.095	92.7787	57.2093	42.5968	71.8218	58.661	43.4997	73.8223
XLOC_001077	XLOC_001077	MIXL1	TSS1299	chr1:226411382-226413513	0.0545637	0	0.246925	0	0	0	0	0	0	0	0	0
XLOC_001078	XLOC_001078	C1orf95	TSS1300	chr1:226736500-226796915	0.0945478	0.022133	0.166963	0.140039	0.0476969	0.23238	0.0794011	0.0163098	0.142492	0.0653514	0.00938228	0.12132
XLOC_001079	XLOC_001079	PSEN2	TSS1301	chr1:227058272-227083804	5.38704	3.48336	7.29072	4.51575	2.87778	6.15372	5.16999	3.32859	7.0114	3.99613	2.46751	5.52474
XLOC_001080	XLOC_001080	ADCK3	TSS1302	chr1:227127937-227175246	2.13019	1.22449	3.0359	2.00379	1.15782	2.84976	1.73798	0.977648	2.49832	1.55108	0.835235	2.26692
XLOC_001081	XLOC_001081	ZNF678	TSS1303	chr1:227751219-227850164	0.483575	0.274353	0.692797	0.776429	0.470643	1.08222	0.716324	0.441424	0.991224	0.653201	0.388105	0.918297
XLOC_001082	XLOC_001082	LOC100130093	TSS1304	chr1:227916239-227968932	0.0904144	0	0.464329	0.110301	0	0.522109	0.125837	0	0.532825	0.0641432	0	0.37839
XLOC_001083	XLOC_001083	SNAP47	TSS1305	chr1:227916239-227968932	11.6075	7.46815	15.7469	11.1056	7.1987	15.0124	9.63	6.15209	13.1079	9.54013	5.9692	13.1111
XLOC_001084	XLOC_001084	PRSS38	TSS1306	chr1:228003417-228034171	0	0	0	0	0	0	0	0	0	0	0	0
XLOC_001085	XLOC_001085	WNT3A	TSS1307	chr1:228194722-228248972	0.180308	0.0232856	0.33733	0.130041	0.00549016	0.254592	0.199691	0.0373971	0.361985	0.117021	0	0.244914
XLOC_001086	XLOC_001086	ARF1	TSS1308,TSS1309	chr1:228270360-228286913	216.523	164.083	268.963	57.0472	42.716	71.3785	187.692	142.606	232.778	177.076	134.467	219.685
XLOC_001087	XLOC_001087	MIR3620	TSS1310	chr1:228270360-228286913	0	0	0	0	0	0	0	0	0	0	0	0
XLOC_001088	XLOC_001088	GUK1	TSS1311,TSS1312,TSS1313	chr1:228327784-228336655	167.231	126.294	208.169	154.094	114.697	193.491	135.854	100.018	171.69	180.361	134.047	226.676
XLOC_001089	XLOC_001089	GJC2	TSS1314	chr1:228337414-228347527	0.449159	0.105031	0.793288	0.229672	0.0233135	0.43603	0.139007	0	0.284069	0.557132	0.169993	0.944272
XLOC_001090	XLOC_001090	IBA57	TSS1315	chr1:228353428-228369958	0.429083	0.21461	0.643556	0.472476	0.246292	0.69866	0.482147	0.253016	0.711278	0.390146	0.194661	0.585631
XLOC_001091	XLOC_001091	OBSCN	TSS1316	chr1:228391206-228566575	1.82886	1.31055	2.34718	1.37951	0.959643	1.79937	1.51548	1.07142	1.95954	1.67163	1.18573	2.15753
XLOC_001092	XLOC_001092	HIST3H2BB	TSS1317	chr1:228645807-228646259	0.305434	0	1.21164	1.66782	0	3.61832	0.882799	0	2.30773	1.18685	0	2.71007
XLOC_001093	XLOC_001093	MIR4666A	TSS1318	chr1:228649774-228649853	0	0	0	0	0	0	0	0	0	0	0	0
XLOC_001094	XLOC_001094	RNF187	TSS1319	chr1:228675067-228683889	41.0511	31.0206	51.0816	37.9514	28.5219	47.3808	51.0441	38.677	63.4112	43.9825	33.1145	54.8506
XLOC_001095	XLOC_001095	DUSP5P1,RHOU	TSS1320,TSS1321,TSS1322	chr1:228780393-228882416	2.23046	1.42091	3.04001	3.88064	2.55003	5.21126	4.80094	3.36609	6.23578	1.79279	1.1119	2.47369
XLOC_001096	XLOC_001096	RAB4A,SPHAR	TSS1323,TSS1324	chr1:229406808-229441640	13.815	10.1214	17.5086	16.6093	12.2474	20.9712	11.4938	8.43323	14.5544	18.4975	13.626	23.3691
XLOC_001097	XLOC_001097	URB2	TSS1325	chr1:229761980-229795946	2.9374	1.98479	3.89002	2.23732	1.47756	2.99708	2.90143	1.9674	3.83546	3.27671	2.25119	4.30224
XLOC_001098	XLOC_001098	GALNT2	TSS1326	chr1:230202955-230417875	13.701	10.168	17.2339	17.031	12.7376	21.3244	20.846	15.7107	25.9813	29.849	22.5071	37.1909
XLOC_001099	XLOC_001099	COG2	TSS1327	chr1:230778201-230829731	5.35038	3.62014	7.08061	4.7419	3.13156	6.35225	6.4329	4.409	8.45681	6.0644	4.12438	8.00442
XLOC_001100	XLOC_001100	CAPN9	TSS1328	chr1:230883129-230937749	0.408588	0.109424	0.707753	0.296934	0.046806	0.547062	0.251291	0.0243359	0.478246	0.128748	0	0.285602
XLOC_001101	XLOC_001101	ARV1	TSS1329	chr1:231114822-231136479	13.6483	9.34854	17.948	9.7469	6.41164	13.0822	12.3707	8.34871	16.3927	16.5404	11.5518	21.529
XLOC_001102	XLOC_001102	TRIM67	TSS1330	chr1:231298673-231357314	0.00766822	0	0.0270613	0.00226203	0	0.0137415	0.00517223	0	0.0186382	0.00868222	0	0.0262792
XLOC_001103	XLOC_001103	GNPAT	TSS1331	chr1:231359508-231413719	24.4318	17.0997	31.7639	14.0865	9.4548	18.7181	22.9908	16.0228	29.9587	18.9229	13.1044	24.7413
XLOC_001104	XLOC_001104	SPRTN	TSS1332	chr1:231473681-231490769	8.95471	6.43794	11.4715	10.7065	7.79495	13.6181	11.1453	8.17522	14.1154	11.3542	8.25599	14.4523
XLOC_001105	XLOC_001105	DISC1,TSNAX,TSNAX-DISC1	TSS1333,TSS1334	chr1:231664398-232177019	35.2813	26.4598	44.1027	41.4395	31.1336	51.7453	32.9699	24.6099	41.3299	31.8704	23.6879	40.0528
XLOC_001106	XLOC_001106	MAP10	TSS1335	chr1:232940637-232946092	0.177263	0.0555379	0.298987	0.21364	0.0703557	0.356925	0.184872	0.0535831	0.316162	0.0976018	0.0129418	0.182262
XLOC_001107	XLOC_001107	NTPCR	TSS1336	chr1:233086369-233114219	48.8348	35.1114	62.5582	61.403	44.6249	78.1811	60.3834	44.069	76.6978	57.9588	42.0768	73.8408
XLOC_001108	XLOC_001108	KIAA1804	TSS1337	chr1:233463513-233520894	9.14451	6.74329	11.5457	11.2727	8.34101	14.2044	6.5346	4.74994	8.31926	16.4832	12.3301	20.6362
XLOC_001109	XLOC_001109	KCNK1	TSS1338	chr1:233749749-233808258	11.6458	8.33735	14.9543	5.71484	3.82367	7.60601	7.60205	5.23996	9.96413	7.02804	4.81729	9.2388
XLOC_001110	XLOC_001110	MIR4427	TSS1339	chr1:233749749-233808258	0	0	0	0	0	0	0	0	0	0	0	0
XLOC_001111	XLOC_001111	SLC35F3	TSS1340	chr1:234040678-234460262	0.0586388	0	0.14551	0.0596142	0	0.146563	0.035076	0	0.101125	0.0862491	0	0.195612
XLOC_001112	XLOC_001112	MIR4671	TSS1341	chr1:234040678-234460262	0	0	0	0	0	0	0	0	0	0	0	0
XLOC_001113	XLOC_001113	COA6	TSS1342,TSS1343	chr1:234509213-234519795	88.8975	65.3164	112.479	89.501	65.9061	113.096	82.8572	61.0639	104.651	97.5337	71.8749	123.192
XLOC_001114	XLOC_001114	LINC00184	TSS1344	chr1:234765056-234770526	0.0211096	0	0.083429	0.0554308	0	0.141844	0.0687782	0	0.167486	0.0520532	0	0.140244
XLOC_001115	XLOC_001115	LOC100506810	TSS1345	chr1:234859788-234867390	0.106022	0.00726777	0.204775	0.095146	0.00281169	0.18748	0.141063	0.0188291	0.263296	0.0401574	0	0.0952971
XLOC_001116	XLOC_001116	GGPS1	TSS1346,TSS1347	chr1:235491752-235507844	14.8883	10.7655	19.011	28.1655	20.8372	35.4937	28.5293	21.1134	35.9451	26.6633	19.7459	33.5807
XLOC_001117	XLOC_001117	TBCE	TSS1348	chr1:235530727-235667781	58.1187	39.163	77.0745	60.4065	42.3783	78.4346	47.1181	32.8591	61.3772	56.0584	38.0748	74.042
XLOC_001118	XLOC_001118	GPR137B	TSS1349	chr1:236305831-236372209	9.31254	6.35865	12.2664	16.5008	11.8103	21.1912	15.1217	10.7385	19.5049	4.97808	3.15774	6.79842
XLOC_001119	XLOC_001119	EDARADD	TSS1350,TSS1351	chr1:236557679-236648008	1.26896	0.6391	1.89881	0.624791	0.24132	1.00826	1.21615	0.611947	1.82036	0.463493	0.145081	0.781906
XLOC_001120	XLOC_001120	LGALS8	TSS1352,TSS1353,TSS1354	chr1:236681513-236767841	3.65282	0.871323	6.43432	4.22269	1.31492	7.13046	4.54335	1.23838	7.84833	4.27014	0.661824	7.87846
XLOC_001121	XLOC_001121	ACTN2	TSS1355	chr1:236849769-236927558	0.0731329	0	0.160451	0.0550528	0	0.122351	0.0155168	0	0.0515377	0.00462123	0	0.0271159
XLOC_001122	XLOC_001122	MTR	TSS1356	chr1:236958580-237067281	5.90314	4.36643	7.43986	5.43927	4.00939	6.86916	7.10275	5.28463	8.92087	6.31913	4.67494	7.96333
XLOC_001123	XLOC_001123	RYR2	TSS1357	chr1:237205701-237997288	0.0889345	0.0332026	0.144667	0.0584171	0.015494	0.10134	0.0407897	0.00758054	0.0739989	0.0300089	0.00302138	0.0569963
XLOC_001124	XLOC_001124	LOC100130331	TSS1358	chr1:238025474-238091619	0.0214154	0	0.083818	0	0	0	0.00852123	0	0.0461008	0.0211395	0	0.0843604
XLOC_001125	XLOC_001125	CHRM3	TSS1359	chr1:239792372-240072717	0.0882003	0	0.193891	0.0693501	0	0.166729	0.0782658	0	0.181331	0.0461968	0	0.126799
XLOC_001126	XLOC_001126	RPS7P5	TSS1360	chr1:240170823-240176560	0	0	0	0	0	0	0	0	0	0	0	0
XLOC_001127	XLOC_001127	FMN2	TSS1361	chr1:240255184-240638489	0	0	0	0.00374085	0	0.0209008	0.00335529	0	0.0210242	0	0	0
XLOC_001128	XLOC_001128	MIR3123	TSS1362	chr1:240938816-241520478	0	0	0	0	0	0	0	0	0	0	0	0
XLOC_001129	XLOC_001129	KMO	TSS1363	chr1:241695433-241803701	0.00867356	0	0.0939293	0.0131152	0	0.124555	0.013186	0	0.146737	0.0138184	0	0.132656
XLOC_001130	XLOC_001130	WDR64	TSS1364	chr1:241815579-241965434	0	0	0	0	0	0	0	0	0	0	0	0
XLOC_001131	XLOC_001131	EXO1	TSS1365,TSS1366	chr1:242011492-242053241	13.7399	10.0504	17.4294	16.5594	12.2006	20.9183	15.0843	11.1205	19.048	14.9466	11.0028	18.8903
XLOC_001132	XLOC_001132	SDCCAG8	TSS1367	chr1:243419306-244006886	13.3815	8.82058	17.9423	12.9463	8.38199	17.5107	14.3344	9.56222	19.1065	14.6019	9.6239	19.5799
XLOC_001133	XLOC_001133	MIR4677	TSS1368	chr1:243419306-244006886	0	0	0	0	0	0	0	0	0	0	0	0
XLOC_001134	XLOC_001134	LOC339529	TSS1369	chr1:244080703-244210619	0	0	0	0.013111	0	0.0735669	0	0	0	0	0	0
XLOC_001135	XLOC_001135	ZBTB18	TSS1370,TSS1371	chr1:244214560-244220778	1.84571	1.13375	2.55767	2.95661	1.92842	3.98479	2.67461	1.73941	3.60981	1.51045	0.892073	2.12882
XLOC_001136	XLOC_001136	C1orf100	TSS1372	chr1:244515936-244552388	0	0	0	0	0	0	0	0	0	0	0	0
XLOC_001137	XLOC_001137	C1orf101	TSS1373	chr1:244624672-244803662	0.0239115	0	0.0921608	0.0844859	0	0.190256	0.0082174	0	0.0862896	0.0395844	0	0.117174
XLOC_001138	XLOC_001138	DESI2	TSS1374	chr1:244816351-244872334	20.6241	15.4402	25.808	37.2635	28.1064	46.4206	43.8896	33.3259	54.4534	30.773	23.1658	38.3802
XLOC_001139	XLOC_001139	COX20	TSS1375	chr1:244998638-245010243	5.28703	1.94896	8.6251	2.72727	0.792897	4.66165	4.44965	1.8337	7.06559	6.45949	2.95188	9.9671
XLOC_001140	XLOC_001140	EFCAB2	TSS1376,TSS1377,TSS1378	chr1:245133170-245288530	7.24855	4.30796	10.1892	6.48481	3.60603	9.36359	4.78682	2.64556	6.92808	5.93519	3.37883	8.49154
XLOC_001141	XLOC_001141	KIF26B	TSS1379	chr1:245318286-245866428	0.945392	0.553857	1.33693	0.726283	0.410497	1.04207	1.36946	0.864634	1.87429	0.859029	0.497025	1.22103
XLOC_001142	XLOC_001142	CNST	TSS1380	chr1:246729638-246831884	10.3892	7.52512	13.2532	12.0886	8.76676	15.4104	8.23085	5.75957	10.7021	9.61763	6.79328	12.442
XLOC_001143	XLOC_001143	SCCPDH	TSS1381	chr1:246887377-246931440	21.8124	15.9692	27.6555	16.0336	11.5917	20.4756	19.1757	14.0036	24.3479	21.5226	15.7581	27.2871
XLOC_001144	XLOC_001144	LOC149134	TSS1382	chr1:246952918-246954788	0	0	0	0	0	0	0	0	0	0	0	0
XLOC_001145	XLOC_001145	VN1R5	TSS1383	chr1:247419373-247420447	0	0	0	0	0	0	0	0	0	0	0	0
XLOC_001146	XLOC_001146	NLRP3	TSS1384,TSS1385	chr1:247579457-247612406	0.0394477	0	0.131767	0.0308167	0	0.132097	0.0823127	0	0.190502	0.0865334	0	0.194275
XLOC_001147	XLOC_001147	OR2W5	TSS1386	chr1:247654369-247655711	0	0	0	0	0	0	0	0	0	0	0	0
XLOC_001148	XLOC_001148	GCSAML	TSS1387	chr1:247712450-247739848	0	0	0	0	0	0	0	0	0	0	0	0
XLOC_001149	XLOC_001149	OR2G2	TSS1388	chr1:247751661-247752615	0	0	0	0	0	0	0	0	0	0	0	0
XLOC_001150	XLOC_001150	OR2G3	TSS1389	chr1:247768887-247769817	0	0	0	0	0	0	0	0	0	0	0	0
XLOC_001151	XLOC_001151	TRIM58	TSS1390	chr1:248020500-248043438	0.538713	0.259555	0.81787	0.293453	0.108566	0.478341	0.533955	0.256788	0.811123	0.375728	0.158993	0.592464
XLOC_001152	XLOC_001152	OR2W3	TSS1391	chr1:248058888-248059833	0.0422545	0	0.177268	0.0298298	0	0.155676	0.10505	0	0.348535	0.0980667	0	0.297188
XLOC_001153	XLOC_001153	OR2T8	TSS1392	chr1:248084319-248085258	0	0	0	0	0	0	0	0	0	0	0	0
XLOC_001154	XLOC_001154	OR2L13	TSS1393	chr1:248100492-248264224	0	0	0	0	0	0	0	0	0	0	0	0
XLOC_001155	XLOC_001155	OR2L8	TSS1394	chr1:248100492-248264224	0	0	0	0	0	0	0	0	0	0	0	0
XLOC_001156	XLOC_001156	OR2AK2	TSS1395	chr1:248100492-248264224	0	0	0	0	0	0	0	0	0	0	0	0
XLOC_001157	XLOC_001157	OR2L1P	TSS1396	chr1:248100492-248264224	0	0	0	0	0	0	0	0	0	0	0	0
XLOC_001158	XLOC_001158	OR2L5	TSS1397	chr1:248100492-248264224	0	0	0	0	0	0	0	0	0	0	0	0
XLOC_001159	XLOC_001159	OR2L2	TSS1398	chr1:248100492-248264224	0	0	0	0	0	0	0	0	0	0	0	0
XLOC_001160	XLOC_001160	OR2L3	TSS1399	chr1:248100492-248264224	0	0	0	0	0	0	0	0	0	0	0	0
XLOC_001161	XLOC_001161	OR2M1P	TSS1400	chr1:248285437-248286082	0	0	0	0	0	0	0	0	0	0	0	0
XLOC_001162	XLOC_001162	OR2M5	TSS1401	chr1:248308449-248309388	0	0	0	0	0	0	0	0	0	0	0	0
XLOC_001163	XLOC_001163	OR2M2	TSS1402	chr1:248343287-248344331	0	0	0	0	0	0	0	0	0	0	0	0
XLOC_001164	XLOC_001164	OR2M3	TSS1403	chr1:248366369-248367308	0	0	0	0	0	0	0	0	0	0	0	0
XLOC_001165	XLOC_001165	OR2M4	TSS1404	chr1:248402230-248403166	0	0	0	0	0	0	0	0	0	0	0	0
XLOC_001166	XLOC_001166	OR14C36	TSS1405	chr1:248512076-248513015	0	0	0	0	0	0	0	0	0	0	0	0
XLOC_001167	XLOC_001167	OR2T4	TSS1406	chr1:248524882-248525929	0	0	0	0	0	0	0	0	0	0	0	0
XLOC_001168	XLOC_001168	OR2T6	TSS1407	chr1:248550909-248551836	0	0	0	0	0	0	0	0	0	0	0	0
XLOC_001169	XLOC_001169	OR2T1	TSS1408	chr1:248569295-248570405	0	0	0	0	0	0	0	0	0	0	0	0
XLOC_001170	XLOC_001170	OR2T2	TSS1409	chr1:248616098-248617073	0	0	0	0	0	0	0	0	0	0	0	0
XLOC_001171	XLOC_001171	OR2T3	TSS1410	chr1:248636651-248637608	0	0	0	0	0	0	0	0	0	0	0	0
XLOC_001172	XLOC_001172	OR2T5	TSS1411	chr1:248651889-248652837	0	0	0	0	0	0	0	0	0	0	0	0
XLOC_001173	XLOC_001173	OR2G6	TSS1412	chr1:248684947-248685898	0	0	0	0	0	0	0	0	0	0	0	0
XLOC_001174	XLOC_001174	MIR3124	TSS1413	chr1:249120575-249120642	0	0	0	0	0	0	0	0	0	0	0	0
XLOC_001175	XLOC_001175	ZNF672	TSS1414	chr1:249132529-249143714	28.6844	21.3209	36.0478	23.9287	17.7868	30.0707	27.5346	20.4704	34.5989	22.5033	16.8576	28.149
XLOC_001176	XLOC_001176	PGBD2	TSS1415	chr1:249200441-249213345	4.03369	2.55734	5.51003	4.01125	2.50689	5.51562	4.11346	2.58733	5.63959	3.73447	2.32687	5.14207
XLOC_001177	XLOC_001177	WASH7P	TSS1416	chr1:11873-29370	0.486838	0.0967041	0.876971	0.456982	0.0854855	0.828478	0.59989	0.158928	1.04085	0.532106	0.112283	0.951928
XLOC_001178	XLOC_001178	FAM138F	TSS1417	chr1:34610-36081	0	0	0	0	0	0	0	0	0	0	0	0
XLOC_001179	XLOC_001179	LOC729737	TSS1418	chr1:134772-140566	0.011134	0	0.0437964	0.0244183	0	0.0638624	0.0250189	0	0.067358	0.0348562	0	0.0895568
XLOC_001180	XLOC_001180	OR4F3	TSS1419	chr1:621095-622034	0	0	0	0	0	0	0	0	0	0	0	0
XLOC_001181	XLOC_001181	LOC100133331	TSS1420	chr1:661138-665731	0.0410491	0	0.101332	0.0435607	0	0.108352	0.0868531	0	0.180315	0.0750998	0	0.165591
XLOC_001182	XLOC_001182	LOC100288069	TSS1421	chr1:700244-714068	0.431463	0.042419	0.820507	0.204349	0	0.446416	0.293405	0	0.600024	0.200421	0	0.448787
XLOC_001183	XLOC_001183	LINC00115	TSS1422	chr1:761585-762902	0.248947	0	0.507434	0.277982	0.000567838	0.555397	0.140537	0	0.318408	0.255106	0	0.529406
XLOC_001184	XLOC_001184	FAM41C	TSS1423	chr1:803450-812182	0.0380867	0	0.134705	0.0296237	0	0.122886	0	0	0	0.0354906	0	0.141327
XLOC_001185	XLOC_001185	LOC100130417	TSS1424	chr1:852952-854817	0.317571	0	0.974015	0.117212	0	0.429981	0.254755	0	0.865038	0.107931	0	0.411625
XLOC_001186	XLOC_001186	NOC2L	TSS1425	chr1:861120-894679	44.924	33.6465	56.2014	44.9837	33.9044	56.063	39.3051	29.4761	49.1341	55.5182	41.8038	69.2326
XLOC_001187	XLOC_001187	C1orf170	TSS1426	chr1:910578-917473	0.508083	0.194641	0.821525	0.465068	0.179175	0.750961	0.737886	0.345162	1.13061	0.842474	0.392709	1.29224
XLOC_001188	XLOC_001188	HES4	TSS1427	chr1:934341-935552	36.9618	26.0628	47.8609	28.617	19.9382	37.2957	32.2159	22.5821	41.8497	40.3839	28.667	52.1009
XLOC_001189	XLOC_001189	RNF223	TSS1428	chr1:1007125-1009687	1.24535	0.335418	2.15528	0.561917	0.060033	1.0638	1.68264	0.614339	2.75094	0.902275	0.187032	1.61752
XLOC_001190	XLOC_001190	C1orf159	TSS1429	chr1:1017197-1051736	7.79138	5.30895	10.2738	5.73398	3.79581	7.67215	5.92176	3.94138	7.90213	6.699	4.4463	8.95169
XLOC_001191	XLOC_001191	TNFRSF18	TSS1430	chr1:1138887-1142089	0.0918151	0	0.284858	0.0939699	0	0.264224	0.131007	0	0.384456	0	0	0
XLOC_001192	XLOC_001192	TNFRSF4	TSS1431	chr1:1146705-1149548	0	0	0	0	0	0	0.01398	0	0.0937429	0	0	0
XLOC_001193	XLOC_001193	SDF4	TSS1432	chr1:1152287-1167447	78.0002	59.3371	96.6634	72.6419	55.0092	90.2746	73.2296	55.8376	90.6217	87.1455	65.8479	108.443
XLOC_001194	XLOC_001194	FAM132A	TSS1433	chr1:1177825-1182102	0.234766	0	0.567519	0.162322	0	0.42254	0.283425	0	0.624136	0.252358	0	0.575139
XLOC_001195	XLOC_001195	UBE2J2	TSS1434	chr1:1189291-1209234	21.0566	15.5322	26.581	16.5025	12.0942	20.9108	20.5637	15.2412	25.8863	21.0043	15.4722	26.5365
XLOC_001196	XLOC_001196	ACAP3	TSS1435	chr1:1227763-1243269	7.22094	5.03749	9.40439	5.54405	3.83024	7.25786	6.5217	4.55931	8.48409	6.64025	4.61341	8.66709
XLOC_001197	XLOC_001197	CPSF3L	TSS1436	chr1:1243993-1260067	30.0858	21.2345	38.9371	26.0352	17.9644	34.1059	23.3979	16.3798	30.4161	27.7766	19.5072	36.046
XLOC_001198	XLOC_001198	DVL1	TSS1437	chr1:1270657-1284492	35.4231	26.5588	44.2875	31.4552	23.4867	39.4237	32.1637	24.2856	40.0418	38.3637	28.6921	48.0352
XLOC_001199	XLOC_001199	MXRA8	TSS1438	chr1:1288070-1293915	0.978074	0.421108	1.53504	0.747088	0.306269	1.18791	0.772288	0.305258	1.23932	0.595306	0.193049	0.997562
XLOC_001200	XLOC_001200	AURKAIP1	TSS1439,TSS1440	chr1:1309109-1310818	168.984	127.615	210.352	145.625	109.221	182.028	140.982	106.81	175.153	171.979	129.278	214.68
XLOC_001201	XLOC_001201	CCNL2	TSS1441	chr1:1321090-1334718	17.8749	12.3495	23.4004	18.8343	13.0042	24.6644	17.3994	11.9411	22.8578	18.1883	12.5998	23.7769
XLOC_001202	XLOC_001202	MRPL20	TSS1442	chr1:1334909-1342693	108.039	77.8824	138.196	93.5655	67.2714	119.86	85.2987	61.7931	108.804	69.413	50.4379	88.3881
XLOC_001203	XLOC_001203	ANKRD65	TSS1443	chr1:1353799-1356824	0.0264284	0	0.158814	0.0184564	0	0.140356	0	0	0	0.0406234	0	0.189644
XLOC_001204	XLOC_001204	TMEM240	TSS1444	chr1:1470157-1475740	0.0987307	0	0.262237	0.056689	0	0.165296	0.0397019	0	0.148341	0.0582974	0	0.176621
XLOC_001205	XLOC_001205	SSU72	TSS1445	chr1:1477052-1510262	104.711	79.0489	130.374	84.1937	63.6776	104.71	66.8118	50.1082	83.5153	96.2406	72.9581	119.523
XLOC_001206	XLOC_001206	C1orf233	TSS1446	chr1:1533387-1535476	17.6084	12.6138	22.6031	12.555	9.00961	16.1005	18.1379	13.0415	23.2344	14.9474	10.7051	19.1897
XLOC_001207	XLOC_001207	CDK11A,CDK11B	TSS1447	chr1:1571099-1655791	13.1923	8.68625	17.6983	12.6345	8.46094	16.808	11.0945	7.23377	14.9552	12.3279	8.33061	16.3253
XLOC_001208	XLOC_001208	SLC35E2B	TSS1448	chr1:1571099-1655791	2.26347	1.11123	3.4157	2.10914	1.10074	3.11753	2.17065	1.13736	3.20393	1.3879	0.603705	2.17209
XLOC_001209	XLOC_001209	SLC35E2	TSS1449	chr1:1656276-1677438	3.20193	2.1655	4.23835	3.2358	2.21316	4.25844	2.79316	1.87071	3.7156	2.09159	1.35344	2.82974
XLOC_001210	XLOC_001210	NADK	TSS1450,TSS1451,TSS1452,TSS1453	chr1:1682670-1711508	19.008	14.0341	23.9819	18.6133	13.7445	23.4821	11.2538	8.18992	14.3178	17.3701	12.7885	21.9518
XLOC_001211	XLOC_001211	GNB1	TSS1454	chr1:1716724-1822526	144.799	109.643	179.954	129.999	98.4418	161.556	43.4614	32.7591	54.1637	109.895	83.2101	136.581
XLOC_001212	XLOC_001212	TMEM52	TSS1455	chr1:1849028-1850740	2.02535	0.85073	3.19997	3.14523	1.65585	4.6346	2.04465	0.891944	3.19736	2.91699	1.39654	4.43743
XLOC_001213	XLOC_001213	KIAA1751	TSS1456	chr1:1884751-1935276	0.1966	0.047076	0.346125	0.239635	0.0692744	0.409996	0.0739857	0	0.15312	0.091622	0	0.183836
XLOC_001214	XLOC_001214	C1orf86	TSS1457,TSS1458,TSS1459	chr1:1981908-2144159	36.8802	21.7907	51.9696	42.6343	26.6602	58.6083	27.6575	16.2572	39.0578	30.861	17.357	44.3649
XLOC_001215	XLOC_001215	MORN1	TSS1460	chr1:2252695-2322993	1.55795	0.580124	2.53578	1.98968	0.848588	3.13077	1.81141	0.778537	2.84429	1.66686	0.682926	2.65079
XLOC_001216	XLOC_001216	LOC100129534	TSS1461	chr1:2252695-2322993	0.580106	0.122011	1.0382	0.62141	0.126105	1.11671	0.461671	0.0602053	0.863136	0.396374	0.0229134	0.769835
XLOC_001217	XLOC_001217	PEX10	TSS1462	chr1:2323213-2344010	15.3451	7.95952	22.7306	13.2115	6.86281	19.5603	13.4908	7.96674	19.0148	16.0221	8.62872	23.4154
XLOC_001218	XLOC_001218	PANK4	TSS1463	chr1:2439974-2458035	8.22474	5.69689	10.7526	9.44538	6.61737	12.2734	5.92858	3.98425	7.87291	6.9739	4.72487	9.22294
XLOC_001219	XLOC_001219	HES5	TSS1464	chr1:2460183-2461684	0	0	0	0	0	0	0	0	0	0.0284238	0	0.124175
XLOC_001220	XLOC_001220	LOC115110	TSS1465	chr1:2481358-2484284	0.0266433	0	0.100501	0	0	0	0.011643	0	0.0673579	0	0	0
XLOC_001221	XLOC_001221	LOC100133445	TSS1466	chr1:2487207-2495267	0	0	0	0	0	0	0	0	0	0	0	0
XLOC_001222	XLOC_001222	MMEL1	TSS1467	chr1:2517898-2564481	0.969674	0.107379	1.83197	0.837555	0.0878965	1.58721	0.787337	0.0351439	1.53953	0.85724	0.0864463	1.62803
XLOC_001223	XLOC_001223	TTC34	TSS1468	chr1:2572806-2706230	0.0143337	0	0.0779655	0	0	0	0	0	0	0	0	0
XLOC_001224	XLOC_001224	FLJ42875	TSS1469	chr1:2976180-2984289	0	0	0	0	0	0	0	0	0	0.0518158	0	0.256279
XLOC_001225	XLOC_001225	MEGF6	TSS1470	chr1:3404505-3528059	1.89657	1.2689	2.52425	1.46227	0.942183	1.98235	1.91843	1.29641	2.54044	1.61103	1.03551	2.18655
XLOC_001226	XLOC_001226	MIR551A	TSS1471	chr1:3404505-3528059	0	0	0	0	0	0	0	0	0	0	0	0
XLOC_001227	XLOC_001227	WRAP73	TSS1472	chr1:3547330-3566671	11.2102	7.72598	14.6945	9.83662	6.70434	12.9689	10.2739	7.0391	13.5086	11.075	7.61758	14.5324
XLOC_001228	XLOC_001228	TP73-AS1	TSS1473,TSS1474	chr1:3569128-3663937	3.47379	2.29153	4.65605	3.26318	2.17931	4.34706	2.61555	1.70448	3.52662	3.01493	1.92399	4.10587
XLOC_001229	XLOC_001229	LRRC47	TSS1475	chr1:3696783-3713068	18.527	13.4192	23.6347	17.8184	13.0345	22.6023	18.626	13.5889	23.6631	21.3099	15.6703	26.9496
XLOC_001230	XLOC_001230	CEP104	TSS1476	chr1:3728644-3773797	6.79934	4.96341	8.63528	7.61768	5.5918	9.64356	7.85297	5.77413	9.93181	7.26443	5.33162	9.19724
XLOC_001231	XLOC_001231	C1orf174	TSS1477	chr1:3805696-3816857	13.8061	9.7494	17.8629	14.7647	10.4464	19.0829	3.88677	2.35965	5.4139	10.496	7.24468	13.7473
XLOC_001232	XLOC_001232	MIR4689	TSS1478	chr1:5922731-5922801	0	0	0	0	0	0	0	0	0	0	0	0
XLOC_001233	XLOC_001233	NPHP4	TSS1479	chr1:5922869-6161253	2.39079	1.29624	3.48533	2.89315	1.55615	4.23015	1.54549	0.660164	2.43082	1.80572	0.590567	3.02088
XLOC_001234	XLOC_001234	CHD5	TSS1480	chr1:6161846-6240194	0.0480789	0.00257376	0.0935841	0.0639895	0.0112426	0.116736	0.0424765	0.00196614	0.0829868	0.026267	0	0.0584072
XLOC_001235	XLOC_001235	RPL22	TSS1481	chr1:6245079-6259679	92.8933	70.1515	115.635	97.5052	73.611	121.399	103.569	78.347	128.792	118.004	89.391	146.616
XLOC_001236	XLOC_001236	ICMT	TSS1482	chr1:6266188-6296044	44.7493	33.6426	55.856	32.0212	23.9981	40.0444	20.4254	15.1098	25.7409	18.3522	13.5316	23.1729
XLOC_001237	XLOC_001237	GPR153	TSS1483	chr1:6307405-6321035	2.74509	1.76978	3.7204	1.80243	1.10236	2.50249	2.12895	1.33675	2.92115	1.49276	0.853703	2.13182
XLOC_001238	XLOC_001238	ACOT7	TSS1484,TSS1485,TSS1486,TSS1487	chr1:6324331-6453826	45.2845	33.0453	57.5236	54.0929	40.1449	68.0409	42.135	30.944	53.3259	53.6775	39.451	67.9039
XLOC_001239	XLOC_001239	HES2	TSS1488	chr1:6475293-6479979	1.72258	1.03593	2.40924	2.10126	1.317	2.88553	2.75664	1.79229	3.72099	0.847262	0.429676	1.26485
XLOC_001240	XLOC_001240	MIR4252	TSS1489	chr1:6484847-6521004	0	0	0	0	0	0	0	0	0	0	0	0
XLOC_001241	XLOC_001241	PLEKHG5,TNFRSF25	TSS1490,TSS1491,TSS1492,TSS1493,TSS1494,TSS1495,TSS1496,TSS1497	chr1:6521213-6580121	9.95581	5.82872	14.0829	7.83466	4.65206	11.0173	9.33743	5.73094	12.9439	7.11987	4.12306	10.1167
XLOC_001242	XLOC_001242	NOL9	TSS1498	chr1:6581406-6614658	4.69908	3.35923	6.03892	3.68787	2.59579	4.77995	4.41731	3.14613	5.6885	4.15194	2.92651	5.37737
XLOC_001243	XLOC_001243	KLHL21	TSS1499	chr1:6650783-6662929	7.42898	5.2845	9.57346	8.08538	5.84478	10.326	9.07142	6.59867	11.5442	9.3927	6.80126	11.9841
XLOC_001244	XLOC_001244	DNAJC11	TSS1500	chr1:6684924-6761966	36.6211	27.1596	46.0825	37.0653	27.4928	46.6379	33.7966	25.1075	42.4857	36.9048	27.3722	46.4374
XLOC_001245	XLOC_001245	UTS2	TSS1501,TSS1502	chr1:7907671-7913551	0	0	0	0	0	0	0	0	0	0	0	0
XLOC_001246	XLOC_001246	TNFRSF9	TSS1503	chr1:7975930-8003225	0.186141	0.0588167	0.313466	0.0700678	0.00111328	0.139022	0.0440111	0	0.0946025	0.0837584	0.0096532	0.157864
XLOC_001247	XLOC_001247	ERRFI1	TSS1504	chr1:8071778-8086393	32.3226	24.3035	40.3416	26.0027	19.404	32.6014	42.7619	32.3533	53.1706	42.9155	32.4181	53.413
XLOC_001248	XLOC_001248	RERE	TSS1505,TSS1506	chr1:8412463-8877699	13.7242	10.25	17.1984	21.3099	16.0736	26.5462	15.9708	11.9763	19.9652	16.5202	12.3392	20.7013
XLOC_001249	XLOC_001249	ENO1	TSS1507,TSS1508	chr1:8921058-8939943	762.043	570.733	953.353	902.021	667.903	1136.14	840.657	623.137	1058.18	1008.36	742.071	1274.65
XLOC_001250	XLOC_001250	SLC2A7	TSS1509	chr1:9063358-9086404	0	0	0	0	0	0	0	0	0	0.0195012	0	0.0983809
XLOC_001251	XLOC_001251	SLC2A5	TSS1510	chr1:9097004-9129887	0.11282	0	0.276985	0.142183	0	0.312611	0.125316	0	0.277853	0.108758	0	0.293776
XLOC_001252	XLOC_001252	GPR157	TSS1511	chr1:9164475-9189229	2.92505	1.39727	4.45282	4.00693	2.19379	5.82007	4.76785	2.68553	6.85017	3.01765	1.4749	4.5604
XLOC_001253	XLOC_001253	MIR34A	TSS1512	chr1:9211726-9211836	0	0	0	0	0	0	0	0	0	0	0	0
XLOC_001254	XLOC_001254	C1orf200	TSS1513	chr1:9711789-9884550	0	0	0	0	0	0	0	0	0	0	0	0
XLOC_001255	XLOC_001255	CLSTN1	TSS1514	chr1:9711789-9884550	49.794	37.1613	62.4267	52.7213	39.2881	66.1545	46.5513	34.6995	58.4031	48.1667	35.9868	60.3466
XLOC_001256	XLOC_001256	CTNNBIP1	TSS1515	chr1:9908333-9970316	17.4097	12.827	21.9924	16.093	11.8881	20.2978	18.4943	13.7098	23.2789	20.733	15.4063	26.0597
XLOC_001257	XLOC_001257	LZIC	TSS1516	chr1:9989775-10002826	24.5969	17.7275	31.4663	41.071	30.2078	51.9341	22.7449	16.2952	29.1946	30.381	22.1778	38.5842
XLOC_001258	XLOC_001258	DFFA	TSS1517	chr1:10520602-10532613	57.4054	42.692	72.1189	48.526	36.2375	60.8146	49.9122	37.0917	62.7327	64.7278	48.8833	80.5724
XLOC_001259	XLOC_001259	CASZ1	TSS1518	chr1:10696665-10856733	2.76068	1.73135	3.79	1.61074	0.912072	2.30941	2.53223	1.6048	3.45966	2.13908	1.32915	2.949
XLOC_001260	XLOC_001260	C1orf127	TSS1519	chr1:11006529-11042094	0.291607	0.0739656	0.509248	0.267517	0.0636368	0.471398	0.1619	0.0157428	0.308058	0.269457	0.0634716	0.475443
XLOC_001261	XLOC_001261	MASP2	TSS1520	chr1:11086579-11107296	0.101653	0	0.308675	0.189395	0	0.426169	0.164811	0	0.391444	0.16726	0	0.441768
XLOC_001262	XLOC_001262	SRM	TSS1521	chr1:11114648-11120091	119.657	89.6628	149.651	67.473	50.2569	84.6892	110.401	82.8795	137.922	178.354	135.308	221.399
XLOC_001263	XLOC_001263	EXOSC10	TSS1522	chr1:11126675-11159938	42.197	31.672	52.7219	42.1665	31.5926	52.7405	35.9044	26.8223	44.9864	37.8443	28.3331	47.3555
XLOC_001264	XLOC_001264	MTOR	TSS1523	chr1:11166587-11322608	13.0894	9.80033	16.3784	12.9733	9.7077	16.2389	18.7331	14.1152	23.3509	20.1472	15.1541	25.1403
XLOC_001265	XLOC_001265	FBXO2	TSS1524	chr1:11708417-11723384	41.8349	29.905	53.7647	32.1993	21.8655	42.5332	45.2697	32.2492	58.2902	46.6323	32.5614	60.7032
XLOC_001266	XLOC_001266	MAD2L2	TSS1525,TSS1526	chr1:11734536-11751678	39.8383	29.0347	50.6419	37.0798	26.8821	47.2776	40.1007	29.2798	50.9215	41.6367	30.3134	52.96
XLOC_001267	XLOC_001267	MTHFR	TSS1527	chr1:11845786-11907840	5.36192	3.55361	7.17024	7.17356	4.8533	9.49382	7.47578	5.25165	9.69992	5.09984	3.28387	6.91581
XLOC_001268	XLOC_001268	NPPA	TSS1528	chr1:11845786-11907840	0	0	0	0.0325924	0	0.509939	0.0646165	0	0.657548	0	0	0
XLOC_001269	XLOC_001269	NPPB	TSS1529	chr1:11917520-11918992	4.492	1.69709	7.28691	1.42094	0.341498	2.50038	4.95615	2.26715	7.64515	3.61436	1.42578	5.80294
XLOC_001270	XLOC_001270	KIAA2013	TSS1530	chr1:11979644-11986485	40.851	30.6746	51.0273	27.5931	20.6157	34.5706	35.2804	26.7218	43.839	35.8157	26.8046	44.8269
XLOC_001271	XLOC_001271	DHRS3	TSS1531	chr1:12627938-12677820	3.00983	1.69282	4.32684	5.69809	3.58635	7.80983	7.01805	4.57585	9.46025	3.54747	2.04834	5.0466
XLOC_001272	XLOC_001272	PRAMEF11	TSS1532	chr1:12884467-12891264	0	0	0	0	0	0	0.0140132	0	0.076908	0	0	0
XLOC_001273	XLOC_001273	HNRNPCL1,LOC649330	TSS1533,TSS1534	chr1:12907235-12908578	0	0	0	0	0	0	0	0	0	0.0260203	0	0.182008
XLOC_001274	XLOC_001274	PRAMEF4	TSS1535	chr1:12939032-12946025	0	0	0	0	0	0	0	0	0	0	0	0
XLOC_001275	XLOC_001275	PRAMEF10	TSS1536	chr1:12952726-12958094	0	0	0	0	0	0	0	0	0	0	0	0
XLOC_001276	XLOC_001276	PRAMEF6	TSS1537	chr1:12998301-13007406	0	0	0	0	0	0	0	0	0	0	0	0
XLOC_001277	XLOC_001277	PRAMEF5	TSS1538	chr1:13108513-13117751	0	0	0	0	0	0	0	0	0	0	0	0
XLOC_001278	XLOC_001278	LOC440563	TSS1539	chr1:13182959-13184326	0	0	0	0	0	0	0	0	0	0	0	0
XLOC_001279	XLOC_001279	PRAMEF3	TSS1540	chr1:13328195-13331692	0	0	0	0	0	0	0	0	0	0	0	0
XLOC_001280	XLOC_001280	PRAMEF8	TSS1541	chr1:13386646-13390765	0	0	0	0	0	0	0	0	0	0	0	0
XLOC_001281	XLOC_001281	PRAMEF13,PRAMEF14	TSS1542	chr1:13447413-13452656	0	0	0	0	0	0	0	0	0	0	0	0
XLOC_001282	XLOC_001282	PRAMEF18	TSS1543	chr1:13474052-13477569	0	0	0	0	0	0	0	0	0	0	0	0
XLOC_001283	XLOC_001283	PRAMEF7,PRAMEF8	TSS1544,TSS1545	chr1:13607430-13611550	0	0	0	0	0	0	0	0	0	0	0	0
XLOC_001284	XLOC_001284	PRAMEF14	TSS1546	chr1:13668268-13673511	0	0	0	0	0	0	0	0	0	0	0	0
XLOC_001285	XLOC_001285	PRAMEF18	TSS1547	chr1:13694888-13698405	0.0107118	0	0.0610402	0	0	0	0	0	0	0	0	0
XLOC_001286	XLOC_001286	LRRC38	TSS1548	chr1:13801444-13840242	0.0285979	0	0.113804	0	0	0	0.0567569	0	0.158981	0.0403324	0	0.124269
XLOC_001287	XLOC_001287	TMEM51-AS1	TSS1549	chr1:14925212-15478960	0.423143	0	0.997311	0.464979	0	1.09305	0.378867	0	0.937855	0.684384	0	1.47099
XLOC_001288	XLOC_001288	CASP9	TSS1550,TSS1551	chr1:15818768-15851285	6.40765	4.30237	8.51294	5.38918	3.57485	7.2035	5.19795	3.43053	6.96537	5.97265	3.95621	7.9891
XLOC_001289	XLOC_001289	AGMAT	TSS1552	chr1:15853351-15911605	1.05129	0	2.11012	1.10936	0.10622	2.1125	1.00416	0.0449409	1.96338	0.987775	0.0870194	1.88853
XLOC_001290	XLOC_001290	UQCRHL	TSS1553	chr1:16133656-16134194	0.106968	0	0.37847	0.239085	0	0.77155	0.0720723	0	0.327098	0.162509	0	0.650249
XLOC_001291	XLOC_001291	FLJ37453	TSS1554	chr1:16160709-16266950	0.529879	0	1.94433	0.791997	0	2.44621	0.69773	0	2.21058	0.620449	0	2.00729
XLOC_001292	XLOC_001292	ZBTB17	TSS1555	chr1:16268363-16302627	13.6736	9.83035	17.5169	9.70231	6.84739	12.5572	12.3297	8.78184	15.8776	11.0428	7.80761	14.278
XLOC_001293	XLOC_001293	HSPB7	TSS1556	chr1:16340522-16345285	0.0499997	0	0.133265	0.0384734	0	0.104919	0.0681727	0	0.160848	0.0260898	0	0.0883845
XLOC_001294	XLOC_001294	FAM131C	TSS1557	chr1:16384263-16400127	0.195097	0	0.413395	0.364513	0.0543789	0.674647	0.365457	0.0510533	0.67986	0.25169	0	0.510022
XLOC_001295	XLOC_001295	EPHA2	TSS1558	chr1:16450831-16482582	31.6849	23.7153	39.6544	10.3534	7.52016	13.1866	35.8264	27.0499	44.6028	30.2876	22.7444	37.8308
XLOC_001296	XLOC_001296	ARHGEF19	TSS1559	chr1:16524598-16539104	10.1476	7.172	13.1233	7.67435	5.31788	10.0308	8.22976	5.74614	10.7134	8.33629	5.80485	10.8677
XLOC_001297	XLOC_001297	RSG1	TSS1560	chr1:16558181-16563659	2.15702	1.09448	3.21955	2.51577	1.32444	3.7071	2.57305	1.40126	3.74484	2.07449	0.999987	3.149
XLOC_001298	XLOC_001298	FBXO42	TSS1561	chr1:16576558-16678948	14.6447	10.6647	18.6247	12.3326	8.92984	15.7353	11.8455	8.56047	15.1305	12.0855	8.7263	15.4448
XLOC_001299	XLOC_001299	SPATA21	TSS1562	chr1:16725137-16763919	0	0	0	0	0	0	0	0	0	0	0	0
XLOC_001300	XLOC_001300	CROCCP3	TSS1563	chr1:16793930-16819196	0.272097	0.0935665	0.450628	0.332588	0.126946	0.538229	0.227027	0.0663705	0.387683	0.129927	0.0223666	0.237487
XLOC_001301	XLOC_001301	NBPF1	TSS1564	chr1:16890411-16939982	3.17503	2.08577	4.26429	2.36425	1.49119	3.23732	3.29377	2.17533	4.41221	2.69646	1.72414	3.66877
XLOC_001302	XLOC_001302	CROCCP2	TSS1565	chr1:16944750-16957401	3.73896	2.048	5.42993	3.51218	1.85275	5.17161	3.72794	2.04362	5.41226	3.93236	2.18283	5.68189
XLOC_001303	XLOC_001303	ESPNP	TSS1566	chr1:17017712-17046652	0.14	0	0.31448	0.0519058	0	0.154892	0.0762516	0	0.202629	0.0293754	0	0.114111
XLOC_001304	XLOC_001304	MST1L	TSS1567	chr1:17081128-17090975	0.00557098	0	0.0279508	0	0	0	0	0	0	0	0	0
XLOC_001305	XLOC_001305	MIR3675	TSS1568	chr1:17185443-17185516	0	0	0	0	0	0	0	0	0	0	0	0
XLOC_001306	XLOC_001306	MFAP2	TSS1569,TSS1570	chr1:17300998-17308081	9.16228	5.84874	12.4758	8.84644	5.75638	11.9365	7.56674	4.79945	10.334	5.33367	3.12033	7.54701
XLOC_001307	XLOC_001307	ATP13A2	TSS1571	chr1:17312452-17338423	14.154	10.3461	17.9619	13.6373	9.96334	17.3112	16.1862	12.0701	20.3023	13.8024	10.0562	17.5486
XLOC_001308	XLOC_001308	SDHB	TSS1572	chr1:17345224-17380665	181.153	137.206	225.101	189.864	143.375	236.352	170.311	128.793	211.829	117.64	88.5635	146.716
XLOC_001309	XLOC_001309	PADI2	TSS1573	chr1:17393255-17445948	1.32663	0.786097	1.86715	4.27202	2.99229	5.55176	3.74716	2.577	4.91733	5.62707	3.95235	7.3018
XLOC_001310	XLOC_001310	RCC2	TSS1574,TSS1575	chr1:17733250-17766250	82.0064	62.1711	101.842	81.4328	61.8012	101.064	101.005	77.0338	124.975	80.311	60.8645	99.7575
XLOC_001311	XLOC_001311	TAS1R2	TSS1576	chr1:19166092-19186155	0	0	0	0	0	0	0	0	0	0	0	0
XLOC_001312	XLOC_001312	ALDH4A1	TSS1577,TSS1578	chr1:19197923-19229293	7.21506	5.02184	9.40828	5.98173	4.12554	7.83791	6.8307	4.76968	8.89173	7.1379	5.01891	9.25689
XLOC_001313	XLOC_001313	MIR4695	TSS1579	chr1:19197923-19229293	0	0	0	0	0	0	0	0	0	0	0	0
XLOC_001314	XLOC_001314	IFFO2	TSS1580	chr1:19230773-19282826	4.74206	3.36793	6.1162	2.16241	1.45529	2.86952	6.91781	5.06925	8.76637	8.44585	6.18611	10.7056
XLOC_001315	XLOC_001315	UBR4	TSS1581	chr1:19400999-19536746	15.0046	11.3273	18.682	12.1379	9.18111	15.0946	12.2059	9.19555	15.2162	12.6714	9.49441	15.8485
XLOC_001316	XLOC_001316	EMC1	TSS1582	chr1:19542157-19578053	13.3538	9.93468	16.7729	7.95891	5.83056	10.0873	12.127	9.02928	15.2247	13.5908	10.1131	17.0685
XLOC_001317	XLOC_001317	AKR7L	TSS1583	chr1:19592475-19600568	0.0781787	0	0.198688	0.111157	0	0.247251	0.0968167	0	0.23674	0.16066	0	0.345703
XLOC_001318	XLOC_001318	AKR7A3	TSS1584	chr1:19609056-19615280	0.116692	0	0.325301	0.148042	0	0.362804	0.177311	0	0.419724	0.129048	0	0.334349
XLOC_001319	XLOC_001319	LOC100506730	TSS1585	chr1:19619740-19622230	1.70096	0.920522	2.48139	1.77847	0.951529	2.60541	1.55117	0.815505	2.28683	1.25707	0.596245	1.9179
XLOC_001320	XLOC_001320	AKR7A2	TSS1586	chr1:19629201-19638640	13.0409	9.41399	16.6678	12.447	8.97971	15.9142	13.5382	9.80784	17.2685	8.79488	6.17824	11.4115
XLOC_001321	XLOC_001321	CAPZB	TSS1587,TSS1588	chr1:19665266-19812066	210.129	160.918	259.339	218.371	169.201	267.54	226.104	174.934	277.273	249.472	191.357	307.588
XLOC_001322	XLOC_001322	TMCO4	TSS1589	chr1:20008705-20126410	12.1464	8.74038	15.5525	9.16261	6.49077	11.8344	13.5826	9.85199	17.3131	10.3135	7.36027	13.2668
XLOC_001323	XLOC_001323	RNF186	TSS1590	chr1:20140521-20141771	0	0	0	0.064566	0	0.201998	0	0	0	0	0	0
XLOC_001324	XLOC_001324	PLA2G2E	TSS1591	chr1:20246799-20250110	0	0	0	0	0	0	0	0	0	0	0	0
XLOC_001325	XLOC_001325	PLA2G2A	TSS1592,TSS1593	chr1:20301923-20306932	0	0	0	0	0	0	0	0	0	0.0323238	0	0.332542
XLOC_001326	XLOC_001326	PLA2G2D	TSS1594	chr1:20439142-20446059	0	0	0	0	0	0	0	0	0	0	0	0
XLOC_001327	XLOC_001327	PLA2G2C	TSS1595	chr1:20490483-20501687	0	0	0	0	0	0	0	0	0	0	0	0
XLOC_001328	XLOC_001328	LOC339505	TSS1596	chr1:20686293-20755287	0.0055261	0	0.0325624	0	0	0	0	0	0	0	0	0
XLOC_001329	XLOC_001329	CAMK2N1	TSS1597	chr1:20808883-20812728	10.0821	7.07937	13.0849	19.3147	14.1161	24.5133	16.7584	12.1825	21.3342	12.9284	9.26378	16.5931
XLOC_001330	XLOC_001330	MUL1	TSS1598	chr1:20825940-20834674	16.0143	11.5778	20.4509	14.394	10.4089	18.3791	16.4034	11.9115	20.8954	13.6844	9.84741	17.5213
XLOC_001331	XLOC_001331	DDOST	TSS1599	chr1:20978259-20988037	174.082	132.01	216.154	77.919	58.8823	96.9558	170.672	129.684	211.661	192.559	145.887	239.231
XLOC_001332	XLOC_001332	KIF17	TSS1600	chr1:20990506-21044317	0.761286	0.353622	1.16895	0.701156	0.316081	1.08623	0.391288	0.135222	0.647354	0.563217	0.229652	0.896782
XLOC_001333	XLOC_001333	SH2D5	TSS1601	chr1:21046224-21059133	1.31434	0.721964	1.90671	1.86449	1.12505	2.60392	2.05101	1.25717	2.84484	3.32028	2.16008	4.48049
XLOC_001334	XLOC_001334	HP1BP3	TSS1602	chr1:21069170-21113181	54.0759	41.0139	67.1379	61.8437	46.8374	76.85	52.5675	39.9028	65.2322	51.5938	39.0478	64.1399
XLOC_001335	XLOC_001335	EIF4G3	TSS1603,TSS1604,TSS1605	chr1:21132784-21503381	30.1825	22.0232	38.3419	24.5454	17.9346	31.1562	26.9153	19.7453	34.0852	25.2195	18.5194	31.9197
XLOC_001336	XLOC_001336	ECE1	TSS1606,TSS1607,TSS1608,TSS1609	chr1:21543739-21672034	54.7142	41.7814	67.6469	50.4646	38.3193	62.6099	55.335	42.4003	68.2697	57.5041	43.6556	71.3526
XLOC_001337	XLOC_001337	RAP1GAP	TSS1610,TSS1611	chr1:21922707-21995856	8.11512	5.72106	10.5092	8.34437	5.78047	10.9083	7.32418	5.12063	9.52772	6.45397	4.44223	8.46572
XLOC_001338	XLOC_001338	USP48	TSS1612	chr1:22004791-22109688	29.6117	22.0961	37.1274	25.5938	19.0695	32.1182	32.0634	23.984	40.1428	25.775	19.1335	32.4166
XLOC_001339	XLOC_001339	HSPG2	TSS1613	chr1:22138757-22263750	22.0559	16.7535	27.3584	21.4048	16.2224	26.5872	26.7197	20.2966	33.1428	23.8647	18.0634	29.6659
XLOC_001340	XLOC_001340	WNT4	TSS1614	chr1:22443797-22469519	0.234119	0.0630604	0.405177	0.092373	0.00080871	0.183937	0.208745	0.0531757	0.364314	0.244049	0.0677034	0.420395
XLOC_001341	XLOC_001341	MIR4253	TSS1615	chr1:23037330-23241823	0	0	0	0	0	0	0	0	0	0	0	0
XLOC_001342	XLOC_001342	LOC729059	TSS1616	chr1:23337326-23342343	0	0	0	0.180976	0	0.587132	0.049028	0	0.287392	0.317028	0	0.868596
XLOC_001343	XLOC_001343	LUZP1	TSS1617	chr1:23410515-23495351	8.08134	5.97638	10.1863	6.4976	4.79407	8.20113	10.433	7.80928	13.0567	10.1453	7.59609	12.6946
XLOC_001344	XLOC_001344	HTR1D	TSS1618	chr1:23518387-23521222	0.0640177	0	0.148547	0.0267802	0	0.0827323	0.0649299	0	0.158464	0.1416	0	0.285478
XLOC_001345	XLOC_001345	HNRNPR	TSS1619	chr1:23636275-23670853	98.8351	74.6067	123.064	100.159	75.5185	124.8	79.3437	59.9664	98.7209	80.3604	60.889	99.8318
XLOC_001346	XLOC_001346	ZNF436	TSS1620,TSS1621	chr1:23685940-23698330	4.16862	2.82238	5.51486	3.52413	2.33732	4.71093	2.77986	1.79553	3.7642	2.95855	1.87927	4.03782
XLOC_001347	XLOC_001347	TCEA3	TSS1622	chr1:23707554-23751261	1.05569	0.421955	1.68942	0.8251	0.308904	1.3413	1.0257	0.408332	1.64307	1.03071	0.4096	1.65183
XLOC_001348	XLOC_001348	ASAP3	TSS1623	chr1:23755055-23810750	6.85403	4.8606	8.84747	6.82119	4.82996	8.81241	7.94882	5.72014	10.1775	4.70987	3.22469	6.19505
XLOC_001349	XLOC_001349	E2F2	TSS1624	chr1:23832919-23857712	2.39111	1.53636	3.24585	2.47975	1.63017	3.32934	3.17657	2.15317	4.19997	2.53995	1.66408	3.41581
XLOC_001350	XLOC_001350	ID3	TSS1625	chr1:23884420-23886285	30.8419	21.5089	40.1749	16.8803	11.4531	22.3076	32.566	23.4176	41.7144	63.7624	47.0156	80.5092
XLOC_001351	XLOC_001351	LOC100506963	TSS1626	chr1:24069855-24104787	10.3407	2.26258	18.4188	9.00539	2.15278	15.858	13.0819	3.84205	22.3218	9.55582	1.78609	17.3255
XLOC_001352	XLOC_001352	GALE	TSS1627,TSS1628,TSS1629	chr1:24122088-24127294	51.6707	38.1423	65.199	48.8328	35.9915	61.6742	60.4751	45.0417	75.9084	59.7228	44.3622	75.0834
XLOC_001353	XLOC_001353	HMGCL	TSS1630	chr1:24128366-24151949	23.9947	17.4672	30.5222	24.4652	17.6645	31.266	24.7632	17.8976	31.6289	19.6562	13.939	25.3734
XLOC_001354	XLOC_001354	FUCA1	TSS1631	chr1:24171571-24194859	31.8478	23.4733	40.2223	63.8036	47.8665	79.7407	27.623	20.2629	34.983	43.6096	32.4018	54.8174
XLOC_001355	XLOC_001355	CNR2	TSS1632	chr1:24200459-24239817	0	0	0	0.0183361	0	0.0896625	0	0	0	0.0171855	0	0.0816905
XLOC_001356	XLOC_001356	SRSF10	TSS1633	chr1:24292936-24306953	36.4889	27.1141	45.8636	48.3536	36.3221	60.3851	44.7536	33.747	55.7603	46.1113	34.4833	57.7394
XLOC_001357	XLOC_001357	MYOM3	TSS1634	chr1:24382530-24438665	0.0209558	0	0.0592855	0.0277337	0	0.0715912	0.0397526	0	0.0895259	0.0264269	0	0.0714778
XLOC_001358	XLOC_001358	IL22RA1	TSS1635	chr1:24446260-24469775	1.99131	1.13071	2.85192	2.09701	1.19919	2.99483	5.07442	3.34781	6.80103	3.17709	1.9498	4.40439
XLOC_001359	XLOC_001359	IFNLR1	TSS1636	chr1:24480646-24513765	4.86365	3.38922	6.33809	2.51156	1.66722	3.3559	4.88305	3.47874	6.28736	4.00411	2.78915	5.21907
XLOC_001360	XLOC_001360	STPG1	TSS1637,TSS1638	chr1:24645811-24741587	7.94987	5.38871	10.511	10.9071	7.65755	14.1566	6.87188	4.33973	9.40402	5.42848	3.5251	7.33186
XLOC_001361	XLOC_001361	RCAN3AS	TSS1639	chr1:24822822-24863510	0	0	0	0.360383	0	2.79773	0.265838	0	1.68762	0	0	0
XLOC_001362	XLOC_001362	RUNX3	TSS1640,TSS1641	chr1:25226001-25291501	2.28574	1.44993	3.12155	2.22328	1.41042	3.03615	3.66409	2.46275	4.86542	3.03892	1.98295	4.09488
XLOC_001363	XLOC_001363	SYF2	TSS1642	chr1:25548766-25559013	33.8053	24.8836	42.727	33.7278	24.9406	42.515	30.2007	22.216	38.1855	29.7829	21.7801	37.7857
XLOC_001364	XLOC_001364	C1orf63	TSS1643	chr1:25568739-25573985	13.9462	9.45838	18.434	13.3373	9.05031	17.6243	10.9069	7.243	14.5708	15.2996	10.5371	20.0621
XLOC_001365	XLOC_001365	RHCE	TSS1644	chr1:25664788-25747363	0.8069	0	2.84487	0.956175	0	3.06452	0.613363	0	2.33636	0.528946	0	2.07155
XLOC_001366	XLOC_001366	LOC646471	TSS1645	chr1:26146396-26159433	0.175359	0	0.456316	0.0918468	0	0.315949	0.177681	0	0.468046	0.136578	0	0.393907
XLOC_001367	XLOC_001367	AUNIP	TSS1646	chr1:26160496-26185848	18.0586	12.9474	23.1698	18.8949	13.5386	24.2513	17.0691	12.1451	21.9932	17.7129	12.7564	22.6693
XLOC_001368	XLOC_001368	PAQR7	TSS1647	chr1:26187974-26197744	12.0455	8.68096	15.41	7.60695	5.31583	9.89807	12.0208	8.70689	15.3347	7.95951	5.58404	10.335
XLOC_001369	XLOC_001369	MIR3917,STMN1	TSS1648,TSS1649,TSS1650	chr1:26210676-26233368	279.537	211.398	347.676	331.082	250.534	411.63	284.983	215.64	354.327	249.216	188.773	309.659
XLOC_001370	XLOC_001370	PAFAH2	TSS1651	chr1:26286257-26324648	10.5189	7.609	13.4288	4.45976	3.02576	5.89377	6.91653	4.87698	8.95608	6.89566	4.85834	8.93298
XLOC_001371	XLOC_001371	SLC30A2	TSS1652	chr1:26364513-26372604	0.599132	0.220465	0.9778	0.120687	0	0.251693	0.79769	0.331747	1.26363	0.209577	0.0111085	0.408045
XLOC_001372	XLOC_001372	TRIM63	TSS1653	chr1:26377795-26394125	0.0162109	0	0.0836974	0	0	0	0.0933826	0	0.254547	0.0183054	0	0.089199
XLOC_001373	XLOC_001373	UBXN11	TSS1654,TSS1655	chr1:26608772-26647014	15.4977	10.5847	20.4107	16.7102	11.4225	21.998	8.61888	5.39848	11.8393	14.299	9.50897	19.0889
XLOC_001374	XLOC_001374	AIM1L	TSS1656	chr1:26648349-26680621	4.00666	2.78065	5.23267	2.69675	1.81013	3.58337	8.90884	6.56021	11.2575	5.97998	4.27383	7.68612
XLOC_001375	XLOC_001375	ZNF683	TSS1657	chr1:26688124-26699266	0	0	0	0	0	0	0	0	0	0.0194548	0	0.127119
XLOC_001376	XLOC_001376	GPN2	TSS1658	chr1:27205872-27216869	21.1548	14.8063	27.5032	17.4067	12.0617	22.7516	20.3751	14.2748	26.4754	22.9714	16.2284	29.7145
XLOC_001377	XLOC_001377	GPATCH3	TSS1659	chr1:27216978-27226962	6.9926	4.6475	9.3377	6.35345	4.24053	8.46638	7.19292	4.86707	9.51878	6.22308	4.09141	8.35474
XLOC_001378	XLOC_001378	NR0B2	TSS1660	chr1:27237974-27240567	0.0374135	0	0.144918	0.0478743	0	0.156302	0	0	0	0	0	0
XLOC_001379	XLOC_001379	C1orf172	TSS1661	chr1:27276046-27286901	18.1229	12.8476	23.3982	13.3103	9.26935	17.3513	15.3712	10.8876	19.8548	16.2518	11.4467	21.0569
XLOC_001380	XLOC_001380	FAM46B	TSS1662	chr1:27331510-27339333	13.6695	9.75742	17.5816	10.7274	7.554	13.9007	21.6365	16.0772	27.1957	12.3393	8.71948	15.9592
XLOC_001381	XLOC_001381	SLC9A1	TSS1663	chr1:27425299-27481621	12.6844	9.34299	16.0257	9.51337	7.09495	11.9318	12.6117	9.49464	15.7289	11.2826	8.33897	14.2263
XLOC_001382	XLOC_001382	MAP3K6	TSS1664	chr1:27681669-27693337	11.9629	8.72769	15.1982	11.2666	8.22317	14.3101	9.41996	6.8085	12.0314	9.50438	6.86435	12.1444
XLOC_001383	XLOC_001383	FCN3	TSS1665	chr1:27695600-27701315	0.036203	0	0.208843	0.0236866	0	0.177021	0.0245756	0	0.194143	0.0316437	0	0.196164
XLOC_001384	XLOC_001384	CD164L2	TSS1666	chr1:27705595-27709805	0.622683	0.182099	1.06327	1.53431	0.701927	2.36669	0.916157	0.363335	1.46898	0.872948	0.306865	1.43903
XLOC_001385	XLOC_001385	WASF2	TSS1667	chr1:27730733-27816678	46.0834	34.9412	57.2256	53.2841	40.1335	66.4347	53.3334	40.4259	66.2409	37.582	28.419	46.745
XLOC_001386	XLOC_001386	AHDC1	TSS1668	chr1:27860755-27930143	9.96475	7.34679	12.5827	10.7958	7.99902	13.5926	10.7923	8.02006	13.5645	8.46992	6.20387	10.736
XLOC_001387	XLOC_001387	FGR	TSS1669,TSS1670,TSS1671	chr1:27938800-27961727	0	0	0	0.0146526	0	0.108377	0.021757	0	0.105291	0	0	0
XLOC_001388	XLOC_001388	IFI6	TSS1672	chr1:27992571-27998724	74.663	54.6304	94.6956	65.0122	47.1678	82.8566	273.101	206.03	340.173	48.3159	34.1465	62.4853
XLOC_001389	XLOC_001389	RPA2	TSS1673	chr1:28218048-28241236	42.7458	31.6985	53.7931	45.6255	33.932	57.3191	33.6182	24.7466	42.4897	36.0748	26.6812	45.4684
XLOC_001390	XLOC_001390	EYA3	TSS1674	chr1:28296854-28415148	6.36261	4.63236	8.09286	8.74116	6.42812	11.0542	5.40156	3.90686	6.89625	10.6526	7.87606	13.4292
XLOC_001391	XLOC_001391	PTAFR	TSS1675,TSS1676	chr1:28473676-28520447	6.00373	4.22952	7.77794	1.65359	0.996192	2.31099	3.61376	2.43566	4.79186	4.10673	2.80008	5.41339
XLOC_001392	XLOC_001392	DNAJC8	TSS1677	chr1:28526789-28559542	112.592	84.9464	140.237	109.244	82.554	135.933	82.0245	61.773	102.276	92.5064	69.8744	115.138
XLOC_001393	XLOC_001393	SNHG12	TSS1678	chr1:28879528-28908366	10.2918	4.1497	16.4339	7.96571	3.66179	12.2696	11.7781	6.29959	17.2566	16.3734	7.98155	24.7652
XLOC_001394	XLOC_001394	SNORD99	TSS1679	chr1:28879528-28908366	527.65	522.216	533.083	0	0	0	442.064	436.631	447.498	0	0	0
XLOC_001395	XLOC_001395	SNORA61	TSS1680	chr1:28879528-28908366	39.7287	0	194.164	17.1142	0	118.766	65.5802	0	249.442	60.2674	0	242.63
XLOC_001396	XLOC_001396	SNORA44	TSS1681	chr1:28879528-28908366	0	0	0	9.28445	0	70.0217	12.3753	0	83.4184	0	0	0
XLOC_001397	XLOC_001397	SNORA16A	TSS1682	chr1:28879528-28908366	5.28973	1.79955	8.77991	0	0	0	2.6961	0	5.77366	8.68696	0	64.6858
XLOC_001398	XLOC_001398	TAF12	TSS1683	chr1:28929608-28969604	44.2072	32.1274	56.287	59.5257	43.6813	75.3701	59.8487	44.0545	75.6429	65.6138	48.4589	82.7687
XLOC_001399	XLOC_001399	TMEM200B	TSS1684,TSS1685	chr1:29213602-29450421	3.25877	0.331808	6.18574	3.30454	0.474585	6.13449	4.5279	0.859105	8.19669	4.12685	0.894844	7.35886
XLOC_001400	XLOC_001400	SRSF4	TSS1686	chr1:29474249-29508637	78.6306	59.246	98.0153	85.7868	65.1363	106.437	78.5703	59.3152	97.8255	94.1378	71.4081	116.868
XLOC_001401	XLOC_001401	MECR	TSS1687	chr1:29519384-29557454	11.2645	7.91383	14.6152	10.0005	6.98378	13.0171	12.2344	8.75637	15.7125	14.0436	10.0664	18.0207
XLOC_001402	XLOC_001402	MATN1	TSS1688	chr1:31184123-31199593	0.0141868	0	0.0552282	0.0236301	0	0.0775825	0.0354484	0	0.106842	0.0340929	0	0.111878
XLOC_001403	XLOC_001403	LAPTM5	TSS1689	chr1:31205314-31230683	0.121207	0	0.272347	0.0137229	0	0.0688876	0.129213	0	0.286632	0.23212	0.00915864	0.45508
XLOC_001404	XLOC_001404	MIR4420	TSS1690	chr1:31205314-31230683	0	0	0	0	0	0	0	0	0	0	0	0
XLOC_001405	XLOC_001405	SDC3	TSS1691	chr1:31342312-31381480	30.9294	23.4649	38.394	19.975	15.1877	24.7623	35.7115	27.4286	43.9944	32.7151	24.8187	40.6116
XLOC_001406	XLOC_001406	PUM1	TSS1692	chr1:31404352-31538564	22.5506	16.9355	28.1656	22.0553	16.5699	27.5407	20.4461	15.3489	25.5433	19.7865	14.8386	24.7344
XLOC_001407	XLOC_001407	SNORD103A	TSS1693	chr1:31404352-31538564	0	0	0	0	0	0	0	0	0	0	0	0
XLOC_001408	XLOC_001408	SNORD103A	TSS1694	chr1:31404352-31538564	0	0	0	0	0	0	0	0	0	0	0	0
XLOC_001409	XLOC_001409	SNORD85	TSS1695	chr1:31404352-31538564	0	0	0	0	0	0	0	0	0	0	0	0
XLOC_001410	XLOC_001410	NKAIN1	TSS1696	chr1:31652591-31712734	0.173383	0.00310882	0.343657	0.08845	0	0.196547	0.213299	0.0298886	0.396708	0.180411	0.00989841	0.350923
XLOC_001411	XLOC_001411	SNRNP40	TSS1697	chr1:31732414-31769644	38.6904	28.4694	48.9114	38.8819	28.626	49.1377	22.9424	16.4868	29.3981	40.2442	29.7309	50.7575
XLOC_001412	XLOC_001412	FABP3	TSS1698	chr1:31838099-31845923	7.99928	4.9477	11.0509	7.38367	4.52551	10.2418	13.4387	8.90495	17.9725	12.1134	8.00539	16.2214
XLOC_001413	XLOC_001413	PEF1	TSS1699,TSS1700	chr1:32095462-32110838	52.0472	38.7025	65.3919	39.2776	29.1541	49.4011	43.0167	32.0226	54.0108	52.6766	39.372	65.9812
XLOC_001414	XLOC_001414	COL16A1	TSS1701	chr1:32117847-32169768	0.331426	0.13536	0.527492	0.403626	0.190251	0.617	0.473938	0.23593	0.711946	0.637564	0.329198	0.945931
XLOC_001415	XLOC_001415	BAI2	TSS1702	chr1:32192717-32229648	1.44073	0.872407	2.00906	1.28943	0.775233	1.80363	1.8237	1.15929	2.48812	1.47376	0.884062	2.06347
XLOC_001416	XLOC_001416	MIR4254	TSS1703	chr1:32192717-32229648	0	0	0	0	0	0	0	0	0	0	0	0
XLOC_001417	XLOC_001417	SPOCD1	TSS1704	chr1:32256024-32281580	3.6196	2.39408	4.84513	1.11071	0.612448	1.60897	2.45134	1.56626	3.33642	5.20578	3.59668	6.81488
XLOC_001418	XLOC_001418	PTP4A2	TSS1705,TSS1706	chr1:32372021-32403988	80.4008	61.081	99.7206	88.3334	66.8233	109.843	77.9419	59.1749	96.7089	79.2535	59.9623	98.5447
XLOC_001419	XLOC_001419	TMEM234	TSS1707	chr1:32681797-32687926	8.57534	5.32723	11.8235	6.8916	4.11243	9.67077	5.7968	3.34876	8.24484	8.39902	5.17114	11.6269
XLOC_001420	XLOC_001420	MTMR9LP	TSS1708	chr1:32697260-32707311	0.430793	0.115902	0.745685	0.289657	0.0466564	0.532657	0.159264	0	0.32647	0.313106	0.0517888	0.574422
XLOC_001421	XLOC_001421	MARCKSL1	TSS1709	chr1:32799429-32801840	137.483	102.967	171.998	96.7111	73.1296	120.293	93.6327	70.3405	116.925	77.9686	58.4584	97.4788
XLOC_001422	XLOC_001422	FAM229A	TSS1710	chr1:32826870-32827844	0.999495	0.0586273	1.94036	0.47331	0	1.06214	0.771584	0	1.56188	0.365274	0	0.904936
XLOC_001423	XLOC_001423	BSDC1	TSS1711	chr1:32830704-32860062	30.2901	22.5852	37.995	17.879	13.1432	22.6147	25.3346	18.8601	31.809	26.8018	19.9548	33.6488
XLOC_001424	XLOC_001424	ZBTB8OS	TSS1712	chr1:33087306-33116185	82.509	58.9392	106.079	98.4366	71.0929	125.78	101.341	73.2988	129.383	96.0257	69.8144	122.237
XLOC_001425	XLOC_001425	SYNC	TSS1713	chr1:33116748-33168361	20.6529	11.5925	29.7133	22.7896	12.0864	33.4927	24.7821	14.8839	34.6802	15.438	8.46972	22.4063
XLOC_001426	XLOC_001426	YARS	TSS1714	chr1:33240839-33324480	95.4357	71.1078	119.764	98.7833	73.9062	123.66	101.175	75.5709	126.778	123.943	93.2732	154.612
XLOC_001427	XLOC_001427	FNDC5	TSS1715,TSS1716	chr1:33327868-33338082	0.311834	0.0710306	0.552638	0.273319	0.0577244	0.488914	0.385488	0.11041	0.660565	0.135395	0	0.290386
XLOC_001428	XLOC_001428	TMEM54	TSS1717	chr1:33352097-33366953	33.531	23.8493	43.2126	19.3744	13.2241	25.5248	30.3295	21.5905	39.0686	20.6545	14.4371	26.8719
XLOC_001429	XLOC_001429	RNF19B	TSS1718	chr1:33402049-33430286	14.218	10.2149	18.2211	13.9	10.0419	17.7581	14.7131	10.5685	18.8578	7.2251	4.93257	9.51763
XLOC_001430	XLOC_001430	AK2	TSS1719	chr1:33473540-33502512	111.874	84.7414	139.007	160.449	120.668	200.23	83.3045	63.0452	103.564	122.316	92.8408	151.792
XLOC_001431	XLOC_001431	TRIM62	TSS1720	chr1:33611002-33647671	3.78937	2.49934	5.0794	4.41183	2.98075	5.8429	3.74731	2.48051	5.01412	2.68249	1.6873	3.67769
XLOC_001432	XLOC_001432	MIR3605,PHC2	TSS1721,TSS1722,TSS1723	chr1:33789223-33841194	34.8055	25.9286	43.6823	26.1782	19.2591	33.0974	37.5498	28.025	47.0745	33.9888	25.2593	42.7184
XLOC_001433	XLOC_001433	CSMD2	TSS1724	chr1:33979608-34631443	0.00334266	0	0.0146515	0	0	0	0	0	0	0	0	0
XLOC_001434	XLOC_001434	SMIM12	TSS1725,TSS1726	chr1:35315962-35325417	8.10149	5.92939	10.2736	5.62468	4.06542	7.18395	8.47665	6.22071	10.7326	8.79888	6.47836	11.1194
XLOC_001435	XLOC_001435	DLGAP3	TSS1727	chr1:35331036-35370984	0.969214	0.46723	1.4712	0.808786	0.391439	1.22613	1.39739	0.789149	2.00563	1.02791	0.515923	1.5399
XLOC_001436	XLOC_001436	LOC653160	TSS1728	chr1:35441299-35444307	0.290137	0.0120513	0.568223	0.0809336	0	0.215314	0.271529	0.0144617	0.528596	0.157698	0	0.349394
XLOC_001437	XLOC_001437	ZMYM6NB	TSS1729	chr1:35447126-35450948	15.0734	9.97304	20.1739	5.94483	3.49174	8.39792	11.9465	7.78403	16.1089	6.67374	3.94898	9.3985
XLOC_001438	XLOC_001438	ZMYM6	TSS1730	chr1:35451766-35497569	6.18816	4.41089	7.96543	7.53215	5.42572	9.63859	7.15367	5.14282	9.16451	5.88525	4.19062	7.57988
XLOC_001439	XLOC_001439	SFPQ	TSS1731	chr1:35649200-35658743	136.01	103.099	168.921	122.462	93.0772	151.846	134.653	102.013	167.293	119.322	90.5439	148.1
XLOC_001440	XLOC_001440	KIAA0319L	TSS1732	chr1:35899090-36023037	21.0726	15.7673	26.3778	23.5639	17.6637	29.4641	21.5101	16.1302	26.8899	11.0877	8.12041	14.055
XLOC_001441	XLOC_001441	PSMB2	TSS1733,TSS1734,TSS1735	chr1:36065142-36107445	44.3879	33.6326	55.1431	94.3152	71.3736	117.257	69.5034	52.7157	86.2911	62.829	47.6041	78.0539
XLOC_001442	XLOC_001442	C1orf216	TSS1736	chr1:36179476-36184790	2.61665	1.60446	3.62884	4.5402	3.04787	6.03254	2.21374	1.33593	3.09156	2.192	1.30564	3.07836
XLOC_001443	XLOC_001443	CLSPN	TSS1737	chr1:36197712-36235551	10.3418	7.6999	12.9837	12.1874	9.1188	15.2561	8.8078	6.50818	11.1074	11.16	8.27579	14.0443
XLOC_001444	XLOC_001444	COL8A2	TSS1738	chr1:36560843-36565850	1.19242	0.707718	1.67712	0.309139	0.12649	0.491788	0.63168	0.339932	0.923428	0.605184	0.307357	0.90301
XLOC_001445	XLOC_001445	TRAPPC3	TSS1739,TSS1740	chr1:36602169-36621654	86.8375	65.4395	108.236	67.6207	50.5334	84.708	74.1141	55.5359	92.6922	83.0431	62.6713	103.415
XLOC_001446	XLOC_001446	EVA1B	TSS1741	chr1:36787631-36789755	20.3253	13.7295	26.9212	14.2596	9.27748	19.2418	18.4784	12.4378	24.519	22.9706	15.6129	30.3284
XLOC_001447	XLOC_001447	STK40	TSS1742	chr1:36805224-36851485	34.4068	25.6956	43.118	12.2623	8.94605	15.5786	35.1464	26.4558	43.8371	17.2995	12.7508	21.8481
XLOC_001448	XLOC_001448	LSM10	TSS1743	chr1:36859030-36863493	49.8496	35.6882	64.0111	48.4079	34.4621	62.3537	48.8804	34.905	62.8558	52.5676	37.6579	67.4774
XLOC_001449	XLOC_001449	OSCP1	TSS1744	chr1:36883506-36916086	9.07564	5.59997	12.5513	9.57068	5.99264	13.1487	4.52021	2.44017	6.60024	5.51808	3.12105	7.9151
XLOC_001450	XLOC_001450	MRPS15	TSS1745	chr1:36921361-36930040	136.092	102.254	169.929	136.229	102.712	169.746	120.041	90.4768	149.604	148.001	111.639	184.363
XLOC_001451	XLOC_001451	CSF3R	TSS1746	chr1:36931643-36948915	0.0069317	0	0.0671715	0	0	0	0	0	0	0	0	0
XLOC_001452	XLOC_001452	GRIK3	TSS1747	chr1:37261127-37499844	0	0	0	0	0	0	0	0	0	0	0	0
XLOC_001453	XLOC_001453	LOC728431	TSS1748	chr1:37920479-37940044	0.977537	0.282635	1.67244	1.08762	0.35995	1.81528	1.47165	0.578364	2.36493	0.880791	0.248345	1.51324
XLOC_001454	XLOC_001454	MEAF6	TSS1749	chr1:37955560-37980420	16.9729	12.6179	21.3279	12.1887	8.93764	15.4397	13.1177	9.67286	16.5625	14.0421	10.4115	17.6728
XLOC_001455	XLOC_001455	MIR5581	TSS1750	chr1:37955560-37980420	0	0	0	0	0	0	0	0	0	0	0	0
XLOC_001456	XLOC_001456	SNIP1	TSS1751	chr1:38000049-38019945	5.44468	3.82305	7.06632	5.47701	3.84553	7.10849	4.2264	2.9042	5.5486	2.73344	1.79554	3.67134
XLOC_001457	XLOC_001457	GNL2	TSS1752	chr1:38022519-38061586	58.2738	43.9363	72.6113	66.1113	49.8634	82.3592	51.5839	38.8221	64.3456	73.581	55.5763	91.5856
XLOC_001458	XLOC_001458	RSPO1	TSS1753	chr1:38076950-38100595	0	0	0	0	0	0	0	0	0	0	0	0
XLOC_001459	XLOC_001459	C1orf109	TSS1754	chr1:38147241-38156192	15.921	11.4414	20.4006	17.8871	12.9313	22.8428	14.6635	10.4659	18.8612	23.124	16.9588	29.2891
XLOC_001460	XLOC_001460	EPHA10	TSS1755	chr1:38181645-38230824	0.00784775	0	0.0675335	0	0	0	0	0	0	0	0	0
XLOC_001461	XLOC_001461	YRDC	TSS1756	chr1:38268613-38275126	12.7128	6.23408	19.1915	8.40028	4.01288	12.7877	14.5078	7.78488	21.2308	16.8954	8.85319	24.9375
XLOC_001462	XLOC_001462	MTF1	TSS1757	chr1:38275238-38325292	6.08779	4.45352	7.72206	3.37483	2.39887	4.35079	4.75709	3.45199	6.06219	5.84686	4.27735	7.41638
XLOC_001463	XLOC_001463	INPP5B	TSS1758	chr1:38326368-38412729	2.40162	1.52973	3.2735	2.68349	1.73595	3.63103	2.42498	1.54933	3.30063	2.08564	1.30857	2.86271
XLOC_001464	XLOC_001464	SF3A3	TSS1759	chr1:38422651-38455761	50.676	38.15	63.202	45.2534	34.111	56.3959	49.2321	37.0498	61.4145	42.3214	31.8175	52.8253
XLOC_001465	XLOC_001465	FHL3	TSS1760	chr1:38462441-38471187	20.5322	14.6451	26.4193	15.1345	10.6418	19.6271	28.859	21.0316	36.6865	20.6885	14.8231	26.5539
XLOC_001466	XLOC_001466	POU3F1	TSS1761	chr1:38509522-38512450	0.0249511	0	0.078355	0.0203661	0	0.0631316	0.0415585	0	0.105247	0.0263127	0	0.0791798
XLOC_001467	XLOC_001467	LOC339442	TSS1762	chr1:38674705-38680439	0	0	0	0	0	0	0	0	0	0	0	0
XLOC_001468	XLOC_001468	RRAGC	TSS1763	chr1:39303868-39325495	22.0494	16.2448	27.8541	25.3291	18.8232	31.8351	26.5687	19.8116	33.3259	16.5399	12.1234	20.9563
XLOC_001469	XLOC_001469	GJA9,GJA9-MYCBP,MYCBP	TSS1764,TSS1765	chr1:39328161-39347298	30.5626	22.8104	38.3147	22.0281	16.2121	27.8441	14.539	10.5391	18.5388	27.3432	20.2833	34.4031
XLOC_001470	XLOC_001470	RHBDL2	TSS1766	chr1:39351478-39407456	0.876734	0.351504	1.40197	0.200186	0.000157674	0.400215	0.767873	0.290794	1.24495	0.632733	0.218717	1.04675
XLOC_001471	XLOC_001471	PPIEL	TSS1767	chr1:39957317-40025370	0.0711361	0	0.17088	0.0548832	0	0.150764	0.0760039	0	0.181248	0.125499	0	0.264537
XLOC_001472	XLOC_001472	PABPC4	TSS1768	chr1:40026484-40042521	33.4355	24.9527	41.9183	69.2027	52.2994	86.106	68.4958	51.966	85.0255	73.2764	55.5259	91.0268
XLOC_001473	XLOC_001473	SNORA55	TSS1769	chr1:40026484-40042521	0	0	0	0	0	0	2.3692	0	9.78716	0	0	0
XLOC_001474	XLOC_001474	HEYL	TSS1770	chr1:40089102-40105348	0.543195	0.224055	0.862336	0.432122	0.166948	0.697296	0.599077	0.269503	0.928652	0.423353	0.16162	0.685086
XLOC_001475	XLOC_001475	NT5C1A	TSS1771	chr1:40124792-40137710	0.151334	0	0.420853	0.0611458	0	0.224896	0.252176	0	0.546312	0.107791	0	0.31729
XLOC_001476	XLOC_001476	HPCAL4	TSS1772	chr1:40144644-40157089	0.0577941	0	0.129564	0.0618598	0	0.135182	0.148885	0.0226457	0.275124	0.173316	0.0317007	0.314931
XLOC_001477	XLOC_001477	BMP8B	TSS1773	chr1:40204516-40254533	0.924095	0.0203196	1.82787	1.35478	0.260368	2.44919	1.02778	0.127042	1.92852	0.758999	0	1.64566
XLOC_001478	XLOC_001478	OXCT2	TSS1774	chr1:40204516-40254533	0.046747	0	0.337569	0.0704703	0	0.414443	0.0569114	0	0.352175	0.0477274	0	0.333508
XLOC_001479	XLOC_001479	TRIT1	TSS1775	chr1:40306705-40349177	13.6898	9.71693	17.6627	6.86592	4.58354	9.14829	12.6204	8.90836	16.3324	14.8159	10.6119	19.0199
XLOC_001480	XLOC_001480	MYCL1	TSS1776	chr1:40361095-40367687	0.927456	0.456667	1.39824	1.34787	0.751923	1.94381	1.14828	0.593758	1.70281	0.979843	0.486107	1.47358
XLOC_001481	XLOC_001481	PPT1	TSS1777	chr1:40538381-40563142	64.606	48.7571	80.455	67.5651	50.9407	84.1896	65.4303	49.3237	81.5369	73.4104	55.3478	91.473
XLOC_001482	XLOC_001482	COL9A2	TSS1778	chr1:40766162-40782939	39.1948	29.6954	48.6942	28.2929	21.1769	35.4089	38.7069	29.6523	47.7615	32.5034	24.3195	40.6874
XLOC_001483	XLOC_001483	RIMS3	TSS1779	chr1:41086351-41131324	0.671785	0.380637	0.962932	1.00374	0.623016	1.38445	0.834384	0.49528	1.17349	0.415077	0.209579	0.620575
XLOC_001484	XLOC_001484	LOC100130557	TSS1780	chr1:41154751-41237275	0.311515	0	1.03037	0.233021	0	0.859549	0.280237	0	0.916401	0.207295	0	0.736314
XLOC_001485	XLOC_001485	CITED4	TSS1781	chr1:41326727-41328018	35.8163	25.6785	45.9541	33.4322	24.3737	42.4906	40.7681	29.628	51.9081	44.8999	32.9156	56.8842
XLOC_001486	XLOC_001486	SLFNL1	TSS1782	chr1:41480261-41707815	0.181429	0	0.704813	0.198324	0	0.696462	0.259938	0	0.891096	0.288033	0	0.914896
XLOC_001487	XLOC_001487	SCMH1	TSS1783,TSS1784,TSS1785,TSS1786	chr1:41480261-41707815	9.34829	6.6001	12.0965	7.49462	5.23414	9.7551	10.4339	7.469	13.3989	8.35619	5.90222	10.8102
XLOC_001488	XLOC_001488	EDN2	TSS1787	chr1:41944445-41950344	11.3007	7.29036	15.3111	5.68579	3.40147	7.97011	30.7949	22.1453	39.4444	22.6901	15.977	29.4031
XLOC_001489	XLOC_001489	HIVEP3	TSS1788,TSS1789,TSS1790	chr1:41972035-42501596	2.10329	0.99278	3.2138	0.622795	0.140551	1.10504	1.73268	0.73501	2.73036	1.69182	0.733961	2.64969
XLOC_001490	XLOC_001490	GUCA2A	TSS1791	chr1:42628361-42630395	0	0	0	0	0	0	0	0	0	0	0	0
XLOC_001491	XLOC_001491	FOXJ3	TSS1792,TSS1793,TSS1794	chr1:42642209-42801548	12.0079	8.92792	15.0878	16.5715	12.3762	20.7667	14.1127	10.5183	17.707	16.3634	12.2355	20.4913
XLOC_001492	XLOC_001492	ZMYND12	TSS1795	chr1:42896000-42921938	0.123663	0	0.302384	0.146087	0	0.335473	0.187362	0	0.410902	0.156737	0	0.356048
XLOC_001493	XLOC_001493	CLDN19	TSS1796	chr1:43198763-43205925	0	0	0	0.0158065	0	0.069349	0.00672942	0	0.0606055	0.00947759	0	0.0724334
XLOC_001494	XLOC_001494	LEPRE1	TSS1797	chr1:43212005-43232755	11.2488	7.96328	14.5343	11.7944	8.42303	15.1658	10.0572	7.07985	13.0346	7.99046	5.45043	10.5305
XLOC_001495	XLOC_001495	CCDC23	TSS1798	chr1:43272722-43310660	13.0438	8.17795	17.9096	28.5216	19.9553	37.088	12.3919	7.76517	17.0187	12.6554	8.10974	17.201
XLOC_001496	XLOC_001496	SLC2A1	TSS1799	chr1:43391045-43449029	51.6375	39.1408	64.1342	37.7413	28.4153	47.0674	58.8513	44.5975	73.1051	55.0319	41.7107	68.3531
XLOC_001497	XLOC_001497	EBNA1BP2	TSS1800,TSS1801	chr1:43629844-43720029	182.164	137.983	226.346	154.833	116.912	192.753	147.425	111.012	183.839	256.293	194.186	318.4
XLOC_001498	XLOC_001498	C1orf210	TSS1802	chr1:43747556-43751288	12.2328	8.29503	16.1706	9.25262	6.12066	12.3846	8.31331	5.50854	11.1181	16.3874	11.4881	21.2867
XLOC_001499	XLOC_001499	ELOVL1	TSS1803,TSS1804	chr1:43829067-43833745	71.3094	53.1535	89.4653	71.1345	52.9046	89.3644	82.2829	61.7728	102.793	90.8923	68.1653	113.619
XLOC_001500	XLOC_001500	MED8	TSS1805	chr1:43849578-43855483	19.4094	14.0234	24.7955	12.5752	8.77319	16.3771	16.6415	11.9024	21.3806	20.3974	14.7838	26.0109
XLOC_001501	XLOC_001501	HYI	TSS1806	chr1:43855555-43919918	9.6805	4.62497	14.736	8.53864	4.10896	12.9683	8.52052	3.62325	13.4178	8.20971	3.51919	12.9002
XLOC_001502	XLOC_001502	KDM4A-AS1	TSS1807	chr1:44115796-44173012	1.22591	0	3.41662	1.34892	0	3.995	0.802817	0	2.25894	1.26007	0	3.31847
XLOC_001503	XLOC_001503	SLC6A9	TSS1808,TSS1809	chr1:44457279-44497164	11.3969	8.18258	14.6113	6.86671	4.77128	8.96215	11.7377	8.51639	14.9589	15.4376	11.2485	19.6266
XLOC_001504	XLOC_001504	ERI3	TSS1810	chr1:44686741-44820939	45.2598	33.7296	56.7901	44.9308	33.5201	56.3415	37.9209	28.247	47.5947	53.1061	39.7841	66.4282
XLOC_001505	XLOC_001505	TMEM53	TSS1811	chr1:45119500-45140099	4.19894	2.47546	5.92243	4.39668	2.64512	6.14825	4.43122	2.65317	6.20927	4.20903	2.49525	5.9228
XLOC_001506	XLOC_001506	BEST4	TSS1812	chr1:45249256-45253426	0.0600208	0	0.160902	0.044911	0	0.135026	0.0432283	0	0.139286	0.0659525	0	0.179925
XLOC_001507	XLOC_001507	TCTEX1D4	TSS1813	chr1:45266035-45272957	0.248623	0	0.920357	0.171821	0	0.682926	0.171246	0	0.672754	0.26576	0	0.986536
XLOC_001508	XLOC_001508	PTCH2	TSS1814	chr1:45285515-45308616	0.213758	0.0407142	0.386802	0.179515	0.0383017	0.320728	0.192908	0.0323782	0.353437	0.0959707	0	0.197684
XLOC_001509	XLOC_001509	EIF2B3	TSS1815	chr1:45316193-45452394	23.9341	17.3719	30.4963	19.9473	14.1775	25.7171	22.2822	16.0433	28.5211	29.5153	21.5246	37.506
XLOC_001510	XLOC_001510	HECTD3	TSS1816	chr1:45468219-45477027	21.1464	15.6968	26.5959	19.5203	14.5034	24.5372	20.8812	15.5407	26.2216	19.7129	14.6417	24.7841
XLOC_001511	XLOC_001511	ZSWIM5	TSS1817	chr1:45482075-45672250	0.00944349	0	0.0374458	0.0124267	0	0.0392282	0	0	0	0	0	0
XLOC_001512	XLOC_001512	MUTYH	TSS1818,TSS1819,TSS1820	chr1:45794913-45956840	9.31957	5.23797	13.4012	7.78254	4.28532	11.2798	6.85024	3.65005	10.0504	6.41266	3.25221	9.57312
XLOC_001513	XLOC_001513	TESK2	TSS1821	chr1:45794913-45956840	2.59124	1.0181	4.16439	1.99858	0.653904	3.34325	1.70811	0.497499	2.91872	2.08959	0.752324	3.42686
XLOC_001514	XLOC_001514	CCDC163P	TSS1822	chr1:45959597-45965751	1.62175	0.801379	2.44212	1.8968	0.977472	2.81612	1.76199	0.890211	2.63376	2.17237	1.16441	3.18033
XLOC_001515	XLOC_001515	PRDX1	TSS1823,TSS1824	chr1:45965855-45988562	434	326.44	541.559	546.522	411.987	681.057	452.202	340.855	563.55	446.636	336.785	556.488
XLOC_001516	XLOC_001516	CCDC17	TSS1825	chr1:46085715-46089731	0.112666	0	0.252456	0.0336401	0	0.116628	0.0901755	0	0.209205	0.111677	0	0.256343
XLOC_001517	XLOC_001517	GPBP1L1	TSS1826	chr1:46092975-46152302	37.4418	28.2302	46.6534	39.7042	30.0173	49.3911	29.0777	21.8566	36.2987	42.2196	31.9387	52.5005
XLOC_001518	XLOC_001518	RPS15AP10	TSS1827	chr1:46092975-46152302	0.240744	0	2.07859	0.275078	0	2.3421	0.0943649	0	1.12871	0.11432	0	1.44275
XLOC_001519	XLOC_001519	IPP	TSS1828	chr1:46153846-46216485	7.56167	3.93811	11.1852	6.21149	2.75896	9.66401	4.00562	1.57754	6.43369	5.12339	2.4484	7.79837
XLOC_001520	XLOC_001520	PIK3R3	TSS1829,TSS1830	chr1:46505811-46598708	10.3447	7.63268	13.0568	17.6811	13.2913	22.0708	17.0346	12.7569	21.3123	13.355	10.0042	16.7059
XLOC_001521	XLOC_001521	POMGNT1	TSS1831,TSS1832	chr1:46654352-46686928	54.287	41.2132	67.3609	58.5447	44.3149	72.7745	41.5161	31.3267	51.7055	60.4418	45.8782	75.0054
XLOC_001522	XLOC_001522	LRRC41	TSS1833	chr1:46713366-46769038	7.19949	2.462	11.937	5.1895	1.29184	9.08716	4.67857	1.78452	7.57263	6.41318	1.52796	11.2984
XLOC_001523	XLOC_001523	KNCN	TSS1834	chr1:47004367-47069966	0	0	0	0	0	0	0	0	0	0	0	0
XLOC_001524	XLOC_001524	MKNK1	TSS1835	chr1:47004367-47069966	13.5732	9.7373	17.4091	11.9629	8.5346	15.3912	13.8057	9.98168	17.6297	11.0919	7.75435	14.4295
XLOC_001525	XLOC_001525	MOB3C	TSS1836,TSS1837	chr1:47073386-47082563	4.58133	2.99811	6.16456	2.76625	1.69058	3.84191	5.20389	3.47549	6.93228	4.08351	2.63823	5.52878
XLOC_001526	XLOC_001526	ATPAF1	TSS1838,TSS1839	chr1:47100710-47134099	26.0821	18.9813	33.1828	28.2022	20.6761	35.7283	26.899	19.6921	34.1059	23.9345	17.4229	30.446
XLOC_001527	XLOC_001527	EFCAB14	TSS1840	chr1:47139707-47184736	13.3313	9.96136	16.7012	4.70213	3.34584	6.05843	16.0803	12.0514	20.1093	5.43437	3.91137	6.95736
XLOC_001528	XLOC_001528	CYP4Z2P	TSS1841	chr1:47308766-47366147	0	0	0	0	0	0	0	0	0	0	0	0
XLOC_001529	XLOC_001529	CYP4A11	TSS1842	chr1:47394845-47407156	0	0	0	0	0	0	0	0	0	0	0	0
XLOC_001530	XLOC_001530	PDZK1IP1	TSS1843	chr1:47649260-47655771	5.64097	3.00134	8.2806	3.03974	1.30066	4.77882	4.30566	2.12489	6.48642	7.18898	3.97716	10.4008
XLOC_001531	XLOC_001531	TAL1	TSS1844	chr1:47681962-47695443	0.0103417	0	0.0409015	0	0	0	0.0201302	0	0.0558026	0.0151921	0	0.0454933
XLOC_001532	XLOC_001532	STIL	TSS1845	chr1:47715810-47779819	16.6694	12.4013	20.9376	19.4686	14.5662	24.371	18.4118	13.7704	23.0532	17.3635	12.9599	21.7671
XLOC_001533	XLOC_001533	FOXD2-AS1	TSS1846	chr1:47897806-47900313	0.395992	0.10857	0.683413	0.327418	0.0782488	0.576587	0.467259	0.146706	0.787812	0.453184	0.133658	0.77271
XLOC_001534	XLOC_001534	TRABD2B	TSS1847	chr1:48226199-48462562	0.00479132	0	0.0216495	0.00293261	0	0.0173651	0	0	0	0	0	0
XLOC_001535	XLOC_001535	SKINTL	TSS1848	chr1:48567386-48648100	0	0	0	0	0	0	0	0	0	0	0	0
XLOC_001536	XLOC_001536	SPATA6	TSS1849	chr1:48761043-48937876	0.0624537	0	0.128254	0.211446	0.0595325	0.363359	0.112708	0.0142611	0.211155	0.0654495	0	0.137683
XLOC_001537	XLOC_001537	AGBL4	TSS1850	chr1:48998526-50489626	0.0100236	0	0.0475552	0.00837709	0	0.0460253	0.00713573	0	0.0479619	0.00911046	0	0.0479784
XLOC_001538	XLOC_001538	BEND5	TSS1851	chr1:48998526-50489626	0.0345878	0	0.138682	0.0128263	0	0.0818843	0.0357965	0	0.154298	0	0	0
XLOC_001539	XLOC_001539	DMRTA2	TSS1852	chr1:50883222-50889119	0.317284	0.0848419	0.549727	0.174135	0.023947	0.324322	0.169048	0.0132442	0.324852	0.11398	0	0.23186
XLOC_001540	XLOC_001540	FAF1	TSS1853	chr1:50906934-51425936	43.9652	32.9532	54.9773	57.0789	43.1159	71.0418	27.1752	20.1331	34.2173	40.8332	30.6282	51.0381
XLOC_001541	XLOC_001541	TTC39A	TSS1854,TSS1855	chr1:51752929-51810785	3.09743	1.88544	4.30943	3.07275	1.8826	4.2629	4.72989	3.09614	6.36365	1.74926	0.954688	2.54383
XLOC_001542	XLOC_001542	EPS15	TSS1856,TSS1857	chr1:51819934-51984995	15.687	11.7025	19.6714	19.3167	14.4389	24.1946	17.0492	12.7472	21.3512	17.3124	12.8922	21.7325
XLOC_001543	XLOC_001543	MIR761,NRD1	TSS1858,TSS1859,TSS1860	chr1:52082545-52344609	91.6613	62.8183	120.504	116.413	81.1741	151.652	97.2282	67.7367	126.72	98.727	68.2239	129.23
XLOC_001544	XLOC_001544	RAB3B	TSS1861	chr1:52373627-52456436	0.224891	0.10821	0.341571	0.114493	0.0410047	0.187981	0.200599	0.0928915	0.308306	0.327764	0.180289	0.475239
XLOC_001545	XLOC_001545	KTI12,TXNDC12	TSS1862,TSS1863	chr1:52485803-52521843	57.7518	43.1686	72.335	45.4562	33.8109	57.1016	39.8625	29.7283	49.9967	52.3405	39.2295	65.4515
XLOC_001546	XLOC_001546	CC2D1B	TSS1864	chr1:52816264-52831877	8.72475	6.38291	11.0666	12.2224	9.06476	15.3801	10.3402	7.61154	13.0689	8.729	6.38404	11.074
XLOC_001547	XLOC_001547	ORC1	TSS1865	chr1:52838500-52870143	7.69726	5.42079	9.97372	6.25524	4.32007	8.19041	6.80107	4.72319	8.87895	9.95332	7.11882	12.7878
XLOC_001548	XLOC_001548	ZCCHC11	TSS1866	chr1:52888947-53018762	8.74526	6.42047	11.07	9.61268	7.12881	12.0965	8.57003	6.32542	10.8146	8.17451	5.99706	10.352
XLOC_001549	XLOC_001549	SELRC1	TSS1867	chr1:53152013-53164038	19.1509	13.8689	24.433	20.8445	15.1619	26.5271	17.112	12.3297	21.8944	18.7027	13.577	23.8285
XLOC_001550	XLOC_001550	ECHDC2	TSS1868	chr1:53361581-53387446	4.13711	2.37017	5.90404	4.12478	2.40622	5.84333	4.22208	2.43532	6.00885	2.55406	1.28647	3.82165
XLOC_001551	XLOC_001551	SLC1A7	TSS1869	chr1:53552854-53608289	0	0	0	0	0	0	0	0	0	0	0	0
XLOC_001552	XLOC_001552	C1orf123	TSS1870	chr1:53662100-53686289	30.8333	18.3586	43.3079	26.6078	16.2537	36.9618	21.6435	12.8342	30.4528	27.9545	17.1601	38.7488
XLOC_001553	XLOC_001553	MAGOH	TSS1871	chr1:53692563-53793821	102.329	65.6036	139.055	103.159	66.4006	139.918	124.301	83.01	165.592	128.594	82.0052	175.183
XLOC_001554	XLOC_001554	LRP8	TSS1872	chr1:53692563-53793821	8.96777	5.8816	12.0539	8.2507	5.12015	11.3812	6.23709	3.61292	8.86126	13.6071	9.05318	18.1611
XLOC_001555	XLOC_001555	SLC25A3P1	TSS1873	chr1:53904042-53905693	0	0	0	0	0	0	0	0	0	0	0	0
XLOC_001556	XLOC_001556	GLIS1	TSS1874	chr1:53971905-54199877	0.0624114	0	0.158332	0.00894772	0	0.0490229	0.0254642	0	0.0875344	0.0209297	0	0.081403
XLOC_001557	XLOC_001557	TMEM48	TSS1875	chr1:54231133-54304225	19.5067	14.5603	24.4531	27.5029	20.6706	34.3352	22.4892	16.8757	28.1027	28.694	21.5608	35.8271
XLOC_001558	XLOC_001558	YIPF1	TSS1876	chr1:54317391-54355487	13.4073	9.42154	17.393	13.7967	9.63341	17.9599	10.8351	7.40536	14.2649	9.94692	6.77632	13.1175
XLOC_001559	XLOC_001559	HSPB11	TSS1877	chr1:54387233-54411288	108.649	78.48	138.819	122.128	88.5184	155.738	103.21	74.3785	132.041	131.477	95.4473	167.506
XLOC_001560	XLOC_001560	LDLRAD1	TSS1878	chr1:54472970-54483859	0.0417383	0	0.178066	0.0220455	0	0.151528	0.0566897	0	0.201309	0	0	0
XLOC_001561	XLOC_001561	TMEM59	TSS1879	chr1:54497348-54519111	65.2851	49.0308	81.5394	66.3224	49.7598	82.8849	64.3261	48.2521	80.4	61.3891	45.9793	76.7989
XLOC_001562	XLOC_001562	CDCP2	TSS1880	chr1:54604667-54618679	0.0104961	0	0.062248	0	0	0	0.0227438	0	0.0791536	0	0	0
XLOC_001563	XLOC_001563	CYB5RL	TSS1881	chr1:54638026-54665746	1.83183	1.07662	2.58704	2.49586	1.55692	3.43481	1.72036	0.995182	2.44554	1.38545	0.74782	2.02309
XLOC_001564	XLOC_001564	SSBP3	TSS1882,TSS1883	chr1:54692194-54872092	41.0761	30.6403	51.5119	55.5863	41.6243	69.5483	40.9178	30.4634	51.3723	44.0439	32.7888	55.299
XLOC_001565	XLOC_001565	FAM151A	TSS1884	chr1:55013806-55100417	0.856725	0.145222	1.56823	0.862727	0.137552	1.5879	0.910065	0.134633	1.6855	0.531702	0.0101114	1.05329
XLOC_001566	XLOC_001566	PARS2	TSS1885	chr1:55222570-55230226	5.97621	3.97802	7.9744	5.26365	3.48088	7.04643	5.49471	3.65351	7.33591	6.32302	4.2441	8.40193
XLOC_001567	XLOC_001567	TTC22	TSS1886	chr1:55246751-55266941	2.50874	1.30985	3.70763	1.52259	0.720564	2.32462	2.41148	1.26796	3.555	1.33502	0.58789	2.08215
XLOC_001568	XLOC_001568	DHCR24	TSS1887	chr1:55315299-55352921	166.628	125.524	207.732	32.6633	24.536	40.7907	202.926	152.641	253.211	172.036	129.482	214.59
XLOC_001569	XLOC_001569	USP24	TSS1888	chr1:55532031-55681039	13.8029	10.4019	17.2038	14.456	10.9023	18.0097	11.9147	8.96885	14.8606	11.9594	8.97796	14.9409
XLOC_001570	XLOC_001570	PPAP2B	TSS1889	chr1:56960418-57045257	8.89001	6.3506	11.4294	7.75133	5.48246	10.0202	10.9613	7.9318	13.9908	7.88919	5.58008	10.1983
XLOC_001571	XLOC_001571	C1orf168	TSS1890	chr1:57184476-57285369	0.00712284	0	0.0392666	0.00729194	0	0.0397834	0.0322064	0	0.0878995	0.0395951	0	0.104167
XLOC_001572	XLOC_001572	C8B	TSS1891	chr1:57394882-57431688	0	0	0	0	0	0	0	0	0	0	0	0
XLOC_001573	XLOC_001573	DAB1	TSS1892	chr1:57463578-58716211	0	0	0	0	0	0	0	0	0	0	0	0
XLOC_001574	XLOC_001574	OMA1	TSS1893	chr1:58946390-59012446	9.06644	6.29316	11.8397	11.2387	7.99853	14.4789	7.1511	4.87876	9.42344	7.83514	5.41675	10.2535
XLOC_001575	XLOC_001575	TACSTD2	TSS1894	chr1:59041094-59043166	397.611	299.585	495.638	43.5807	32.1511	55.0103	368.308	277.413	459.203	240.857	182.542	299.172
XLOC_001576	XLOC_001576	MYSM1	TSS1895	chr1:59120410-59165747	5.22662	3.80562	6.64761	6.01562	4.40169	7.62955	6.0453	4.43093	7.65967	5.78636	4.23023	7.34249
XLOC_001577	XLOC_001577	JUN	TSS1896	chr1:59246462-59249785	37.9456	28.5886	47.3025	20.1812	14.659	25.7034	31.0267	23.2769	38.7765	38.1717	28.9884	47.355
XLOC_001578	XLOC_001578	HSD52	TSS1897	chr1:59597607-59612479	0.0230747	0	0.12847	0	0	0	0	0	0	0	0	0
XLOC_001579	XLOC_001579	MIR4711	TSS1898	chr1:59762624-60228402	0	0	0	0	0	0	0	0	0	0	0	0
XLOC_001580	XLOC_001580	CYP2J2	TSS1899	chr1:60358979-60392423	4.73584	2.89029	6.58139	3.13049	1.73731	4.52367	7.70036	5.05247	10.3482	4.00084	2.37554	5.62613
XLOC_001581	XLOC_001581	C1orf87	TSS1900	chr1:60456065-60539442	0	0	0	0	0	0	0	0	0	0	0	0
XLOC_001582	XLOC_001582	TM2D1	TSS1901	chr1:62146718-62191095	27.4177	19.7841	35.0512	23.0768	16.5664	29.5873	13.5799	9.34675	17.813	9.21469	6.0413	12.3881
XLOC_001583	XLOC_001583	KANK4	TSS1902	chr1:62701836-62785083	0.708482	0.366863	1.0501	0.380447	0.161567	0.599327	0.617732	0.309332	0.926131	0.26913	0.0954921	0.442768
XLOC_001584	XLOC_001584	DOCK7	TSS1903	chr1:62920396-63154039	19.9337	14.6117	25.2558	19.3454	14.1306	24.5602	17.2963	12.6982	21.8945	14.465	10.515	18.4151
XLOC_001585	XLOC_001585	LINC00466	TSS1904	chr1:63624753-63782901	0.0826925	0	0.210159	0.0479787	0	0.148197	0.0666294	0	0.183406	0.11102	0	0.252905
XLOC_001586	XLOC_001586	ITGB3BP	TSS1905	chr1:63906440-63988944	28.1515	20.0774	36.2255	33.7846	24.1101	43.4591	22.2309	15.6675	28.7943	31.6784	22.7041	40.6526
XLOC_001587	XLOC_001587	JAK1	TSS1906	chr1:65210777-65432187	81.056	59.9617	102.15	91.6459	68.5933	114.699	52.7865	38.6638	66.9092	53.621	39.5643	67.6778
XLOC_001588	XLOC_001588	MIR3671	TSS1907	chr1:65523437-65523525	0	0	0	0	0	0	0	0	0	0	0	0
XLOC_001589	XLOC_001589	MIR101-1	TSS1908	chr1:65524116-65524191	0	0	0	0	0	0	0	0	0	0	0	0
XLOC_001590	XLOC_001590	INSL5	TSS1909	chr1:67263423-67266942	0	0	0	0	0	0	0	0	0	0	0	0
XLOC_001591	XLOC_001591	WDR78	TSS1910	chr1:67278571-67390570	3.91832	2.29508	5.54156	5.48724	3.3818	7.59267	1.53844	0.684966	2.39191	1.99505	0.9223	3.06781
XLOC_001592	XLOC_001592	SLC35D1	TSS1911	chr1:67465014-67520080	3.02001	2.09139	3.94863	7.22267	5.25941	9.18594	6.37406	4.65073	8.09739	8.39015	6.15557	10.6247
XLOC_001593	XLOC_001593	C1orf141	TSS1912,TSS1913	chr1:67557858-67600654	0	0	0	0.0118845	0	0.138344	0	0	0	0	0	0
XLOC_001594	XLOC_001594	SERBP1	TSS1914	chr1:67873492-67896123	111.956	84.3471	139.564	135.029	101.385	168.673	149.881	112.101	187.661	147.424	110.216	184.632
XLOC_001595	XLOC_001595	GNG12	TSS1915	chr1:68167148-68698284	67.8523	43.5306	92.1739	65.9775	41.0512	90.9039	85.5989	56.9331	114.265	87.0364	56.0323	118.04
XLOC_001596	XLOC_001596	DIRAS3	TSS1916	chr1:68167148-68698284	0.573784	0	4.31695	0.931272	0	5.52742	0.815175	0	5.35094	1.74382	0	8.60049
XLOC_001597	XLOC_001597	WLS	TSS1917	chr1:68167148-68698284	149.121	98.6735	199.569	143.891	94.7229	193.058	123.961	77.9595	169.962	145.488	90.3474	200.628
XLOC_001598	XLOC_001598	MIR1262	TSS1918	chr1:68167148-68698284	0	0	0	0	0	0	0	0	0	0	0	0
XLOC_001599	XLOC_001599	RPE65	TSS1919	chr1:68894506-68915642	0.0432736	0	0.122002	0.0111754	0	0.0572725	0.0107383	0	0.056809	0.0117351	0	0.0557057
XLOC_001600	XLOC_001600	DEPDC1	TSS1920	chr1:68939834-68962799	21.8515	16.4569	27.246	14.8088	10.9693	18.6482	9.73227	7.14686	12.3177	26.0574	19.6223	32.4925
XLOC_001601	XLOC_001601	LRRC40	TSS1921	chr1:70610484-70671361	23.3497	17.2775	29.4219	28.6641	21.2605	36.0677	23.243	17.2207	29.2653	19.2885	14.1307	24.4464
XLOC_001602	XLOC_001602	ANKRD13C	TSS1922	chr1:70724684-70820417	7.00376	5.11431	8.89321	12.0402	8.92491	15.1555	12.8562	9.62121	16.0912	14.2264	10.6241	17.8288
XLOC_001603	XLOC_001603	PTGER3	TSS1923	chr1:71318035-71546972	0.0122907	0	0.270831	0	0	0	0.0169971	0	0.258577	0.0339002	0	0.392298
XLOC_001604	XLOC_001604	ZRANB2	TSS1924	chr1:71318035-71546972	32.0608	23.9735	40.1481	40.1844	30.2273	50.1414	30.9058	23.0617	38.7498	32.4057	24.3014	40.5099
XLOC_001605	XLOC_001605	MIR186	TSS1925	chr1:71318035-71546972	0	0	0	0	0	0	0	0	0	206.954	196.855	217.052
XLOC_001606	XLOC_001606	NEGR1	TSS1926	chr1:71868624-72748277	0.0157837	0	0.0451843	0.0226389	0	0.0636416	0.01774	0	0.0529847	0.00763332	0	0.0334949
XLOC_001607	XLOC_001607	NEGR1-IT1	TSS1927	chr1:71868624-72748277	0	0	0	0	0	0	0	0	0	0	0	0
XLOC_001608	XLOC_001608	LRRIQ3	TSS1928	chr1:74491701-74663871	0.133384	0	0.272357	0.279421	0.0458113	0.51303	0.189503	0.00792674	0.37108	0.174735	0.00843918	0.341032
XLOC_001609	XLOC_001609	C1orf173	TSS1929	chr1:75033794-75139422	0	0	0	0	0	0	0.00266157	0	0.0175871	0	0	0
XLOC_001610	XLOC_001610	CRYZ	TSS1930	chr1:75171171-75232360	35.6907	25.1342	46.2472	44.4622	30.8684	58.0561	38.3526	26.4092	50.2961	41.5204	28.2162	54.8246
XLOC_001611	XLOC_001611	SLC44A5	TSS1931	chr1:75667815-76076799	0.0499008	0	0.125142	0.0231566	0	0.0880817	0.0164809	0	0.0655904	0.0140635	0	0.0735715
XLOC_001612	XLOC_001612	ASB17	TSS1932	chr1:76384557-76398116	0	0	0	0	0	0	0	0	0	0	0	0
XLOC_001613	XLOC_001613	PIGK	TSS1933	chr1:77554666-77685132	17.3805	13.0738	21.6873	30.0399	22.6615	37.4183	23.9751	18.206	29.7443	25.4219	19.1445	31.6992
XLOC_001614	XLOC_001614	ZZZ3	TSS1934	chr1:78030189-78148343	23.4096	17.5306	29.2886	24.0438	17.9618	30.1258	22.7211	16.9751	28.4672	17.3832	12.9187	21.8478
XLOC_001615	XLOC_001615	USP33	TSS1935	chr1:78161673-78225564	49.6031	37.203	62.0032	95.8904	72.369	119.412	77.3765	58.7436	96.0095	59.3371	44.8146	73.8596
XLOC_001616	XLOC_001616	FUBP1	TSS1936	chr1:78413590-78444777	47.1116	35.5435	58.6797	35.3299	26.4299	44.2299	55.3243	41.8246	68.8239	38.0522	28.5502	47.5541
XLOC_001617	XLOC_001617	ELTD1	TSS1937	chr1:79355448-79472495	0	0	0	0	0	0	0	0	0	0	0	0
XLOC_001618	XLOC_001618	MIR548AP	TSS1938	chr1:84259597-84464833	0	0	0	0	0	0	0	0	0	0	0	0
XLOC_001619	XLOC_001619	TTLL7	TSS1939	chr1:84259597-84464833	0.309068	0.0952087	0.522927	0.769286	0.361816	1.17675	0.515512	0.207114	0.82391	0.436879	0.165076	0.708681
XLOC_001620	XLOC_001620	UOX	TSS1940	chr1:84830640-84863576	0	0	0	0	0	0	0	0	0	0	0	0
XLOC_001621	XLOC_001621	GNG5	TSS1941	chr1:84944919-84972262	303.988	218.607	389.368	512.587	379.837	645.336	483.425	355.644	611.207	512.278	378.241	646.315
XLOC_001622	XLOC_001622	CTBS	TSS1942	chr1:85018803-85040163	12.5588	9.10949	16.0082	15.0876	11.02	19.1552	11.6914	8.48654	14.8963	10.1752	7.2891	13.0613
XLOC_001623	XLOC_001623	C1orf180	TSS1943	chr1:85093912-85100703	0	0	0	0.0156862	0	0.0511759	0.00669772	0	0.0440051	0	0	0
XLOC_001624	XLOC_001624	SSX2IP	TSS1944	chr1:85109389-85156240	8.14722	6.02452	10.2699	14.6548	10.9714	18.3382	16.4458	12.6018	20.2897	8.19101	6.02066	10.3614
XLOC_001625	XLOC_001625	LPAR3	TSS1945	chr1:85279085-85358896	5.16419	3.16868	7.15971	2.34376	1.22998	3.45754	3.59542	2.09955	5.09128	2.14475	1.13071	3.1588
XLOC_001626	XLOC_001626	MCOLN2	TSS1946	chr1:85391265-85462796	0.0489851	0	0.119139	0.0242662	0	0.0761139	0.01955	0	0.0684436	0.0320815	0	0.0925176
XLOC_001627	XLOC_001627	MCOLN3	TSS1947	chr1:85483764-85514223	3.27335	2.11622	4.43048	4.80398	3.25958	6.34837	3.64608	2.39748	4.89468	1.87653	1.08383	2.66923
XLOC_001628	XLOC_001628	SYDE2	TSS1948	chr1:85623355-85666728	3.50783	2.38323	4.63243	3.41451	2.29133	4.53769	4.4128	3.05549	5.77012	3.43675	2.30054	4.57297
XLOC_001629	XLOC_001629	C1orf52	TSS1949	chr1:85715636-85725355	9.08787	6.5013	11.6744	11.7531	8.47807	15.0281	11.4104	8.26294	14.5578	14.4586	10.5644	18.3527
XLOC_001630	XLOC_001630	BCL10	TSS1950	chr1:85731459-85743771	9.34774	6.71418	11.9813	9.30497	6.63099	11.9789	11.1626	8.12722	14.198	11.8962	8.65118	15.1411
XLOC_001631	XLOC_001631	DDAH1	TSS1951,TSS1952	chr1:85784167-86044046	57.8184	43.6607	71.9762	42.0312	31.7191	52.3432	61.4514	46.5377	76.365	52.7284	39.8	65.6569
XLOC_001632	XLOC_001632	ZNHIT6	TSS1953	chr1:86115105-86174116	14.7454	11.0695	18.4214	11.3295	8.41351	14.2456	13.1887	9.89515	16.4823	14.018	10.4784	17.5575
XLOC_001633	XLOC_001633	COL24A1	TSS1954	chr1:86194915-86622121	0.104432	0.0191441	0.18972	0.0829429	0.0100705	0.155815	0.0543162	0	0.112392	0.0431488	0	0.0934045
XLOC_001634	XLOC_001634	ODF2L	TSS1955	chr1:86812506-86862025	16.1196	11.8903	20.349	16.3781	12.2232	20.533	13.0638	9.62225	16.5053	11.6146	8.46717	14.7621
XLOC_001635	XLOC_001635	2018-09-15	TSS1956	chr1:87328127-87380107	132.845	100.495	165.194	124.087	93.9202	154.254	93.923	70.877	116.969	132.156	100.381	163.931
XLOC_001636	XLOC_001636	LOC100505768	TSS1957	chr1:87819209-87837338	0	0	0	0	0	0	0	0	0	0	0	0
XLOC_001637	XLOC_001637	GTF2B	TSS1958	chr1:89318320-89357301	21.8442	15.8964	27.7919	19.0127	13.6794	24.3461	19.0265	13.7756	24.2774	19.3008	13.9294	24.6721
XLOC_001638	XLOC_001638	CCBL2,RBMXL1	TSS1959	chr1:89401455-89458643	47.8336	34.5297	61.1374	38.1511	27.4567	48.8455	49.1184	35.4123	62.8246	43.7453	31.1881	56.3026
XLOC_001639	XLOC_001639	GBP3	TSS1960	chr1:89472359-89488549	16.5641	12.0812	21.0469	14.1966	10.227	18.1661	14.5258	10.5632	18.4884	17.6435	12.8732	22.4138
XLOC_001640	XLOC_001640	GBP1	TSS1961	chr1:89517986-89531043	45.0679	33.428	56.7077	10.8571	7.69642	14.0177	46.2809	34.3751	58.1868	44.8449	33.2421	56.4477
XLOC_001641	XLOC_001641	GBP2	TSS1962	chr1:89573309-89591799	31.4789	23.3336	39.6243	21.1056	15.3771	26.834	40.7126	30.308	51.1173	24.7889	17.9913	31.5865
XLOC_001642	XLOC_001642	GBP7	TSS1963	chr1:89597433-89641723	0	0	0	0.0117608	0	0.0607389	0.00897683	0	0.0526387	0	0	0
XLOC_001643	XLOC_001643	GBP4	TSS1964	chr1:89646830-89664633	0.620241	0.337018	0.903463	0.311779	0.127961	0.495596	1.57713	1.03293	2.12133	0.451976	0.224024	0.679927
XLOC_001644	XLOC_001644	GBP5	TSS1965	chr1:89724633-89738544	4.43225	3.02776	5.83675	2.38462	1.51952	3.24971	2.21316	1.3775	3.04881	3.43727	2.26424	4.61029
XLOC_001645	XLOC_001645	FLJ27354	TSS1966	chr1:90090407-90098453	0	0	0	0.0326124	0	0.177087	0.0448883	0	0.212905	0	0	0
XLOC_001646	XLOC_001646	GEMIN8P4	TSS1967	chr1:90458823-90460525	5.28664	3.18907	7.3842	3.73887	2.0882	5.38954	4.69734	2.74856	6.64613	5.14461	3.08897	7.20024
XLOC_001647	XLOC_001647	BARHL2	TSS1968	chr1:91177578-91182794	0	0	0	0	0	0	0	0	0	0	0	0
XLOC_001648	XLOC_001648	ZNF644	TSS1969,TSS1970	chr1:91380856-91487812	30.0917	21.7005	38.4829	26.4458	18.8878	34.0038	28.2108	20.8231	35.5985	21.5919	15.2117	27.972
XLOC_001649	XLOC_001649	HFM1	TSS1971	chr1:91726322-91870426	0	0	0	0.0106217	0	0.0351124	0.014423	0	0.0469577	0	0	0
XLOC_001650	XLOC_001650	TGFBR3	TSS1972,TSS1973	chr1:92145899-92371559	7.17933	5.25037	9.1083	4.56076	3.2502	5.87132	10.1202	7.49219	12.7483	5.94139	4.28461	7.59816
XLOC_001651	XLOC_001651	GLMN	TSS1974	chr1:92711954-92853732	12.767	7.72901	17.805	14.5012	8.65212	20.3503	12.4506	7.24475	17.6565	12.8895	7.6746	18.1043
XLOC_001652	XLOC_001652	GFI1	TSS1975,TSS1976,TSS1977	chr1:92940317-92952433	0.0847151	0	0.195744	0.0479292	0	0.131883	0.0665811	0	0.166878	0.0449376	0	0.128274
XLOC_001653	XLOC_001653	EVI5	TSS1978	chr1:92974252-93257961	2.4101	1.67989	3.14032	3.48938	2.46902	4.50973	4.0427	2.95435	5.13105	3.16977	2.24435	4.09519
XLOC_001654	XLOC_001654	FAM69A	TSS1979,TSS1980	chr1:93297593-93427079	15.0411	0	38.9613	11.937	0	32.8818	16.8793	0	44.6811	8.40768	0	27.6125
XLOC_001655	XLOC_001655	TMED5	TSS1981	chr1:93615298-93646246	22.6348	17.2986	27.971	22.0595	16.727	27.392	29.7368	22.7418	36.7319	38.4002	29.1891	47.6114
XLOC_001656	XLOC_001656	LOC100131564	TSS1982	chr1:93775665-93811368	0.869027	0.444637	1.29342	0.840999	0.423805	1.25819	0.871408	0.444135	1.29868	0.67022	0.320058	1.02038
XLOC_001657	XLOC_001657	BCAR3	TSS1983,TSS1984,TSS1985,TSS1986	chr1:94027342-94312706	13.2538	9.53876	16.9689	11.7658	8.38298	15.1485	18.3017	13.3777	23.2257	20.7531	15.2375	26.2688
XLOC_001658	XLOC_001658	DNTTIP2	TSS1987	chr1:94335013-94344762	61.3686	46.5159	76.2212	58.9055	44.41	73.401	54.8544	41.4878	68.221	61.3178	46.3383	76.2974
XLOC_001659	XLOC_001659	GCLM	TSS1988	chr1:94352589-94375012	25.1833	18.7651	31.6015	10.0009	7.08773	12.9141	25.4357	18.9215	31.9498	30.3317	22.6093	38.0541
XLOC_001660	XLOC_001660	ABCA4	TSS1989	chr1:94458393-94586705	0.372649	0.175116	0.570183	0.159843	0.0518585	0.267827	0.412952	0.200337	0.625568	0.319788	0.139756	0.499821
XLOC_001661	XLOC_001661	ARHGAP29	TSS1990	chr1:94634462-94703307	72.9206	55.0954	90.7459	39.3795	29.574	49.1849	39.1929	29.7088	48.6769	47.3357	35.8057	58.8658
XLOC_001662	XLOC_001662	F3	TSS1991	chr1:94994731-95007413	35.6703	26.6954	44.6452	18.7868	13.529	24.0446	26.6677	19.5775	33.7579	34.6581	25.6625	43.6536
XLOC_001663	XLOC_001663	CNN3	TSS1992	chr1:95362506-95392735	351.504	265.34	437.667	223.793	169.452	278.134	302.904	228.968	376.841	337.811	255.216	420.407
XLOC_001664	XLOC_001664	ALG14	TSS1993	chr1:95448278-95538507	6.7878	4.06376	9.51183	5.37743	3.05396	7.70089	7.22614	4.38056	10.0717	6.48735	3.84422	9.13049
XLOC_001665	XLOC_001665	DPYD	TSS1994	chr1:97543299-98386615	0.500025	0.0597546	0.940296	0.690128	0.209073	1.17118	0.725932	0.250152	1.20171	0.635198	0.172064	1.09833
XLOC_001666	XLOC_001666	MIR137,MIR137HG	TSS1995,TSS1996	chr1:98453555-98515249	0	0	0	0	0	0	0	0	0	0.00893618	0	1.07672
XLOC_001667	XLOC_001667	MIR2682	TSS1997	chr1:98453555-98515249	0	0	0	0	0	0	0	0	0	0	0	0
XLOC_001668	XLOC_001668	LPPR5	TSS1998	chr1:99355800-99614408	0	0	0	0	0	0	0	0	0	0	0	0
XLOC_001670	XLOC_001670	FRRS1	TSS2000	chr1:100111430-100231349	5.42222	2.70131	8.14314	4.89944	2.43896	7.35993	6.71815	3.86897	9.56733	5.27705	2.83141	7.7227
XLOC_001671	XLOC_001671	SASS6	TSS2001	chr1:100549101-100598511	7.05958	5.03306	9.0861	7.23815	5.13507	9.34123	6.41985	4.57821	8.2615	5.53574	3.8541	7.21738
XLOC_001672	XLOC_001672	LRRC39	TSS2002	chr1:100598705-100643829	0.29679	0	0.697119	0.31438	0	0.849355	0.415167	0	0.917005	0.451334	0	0.984321
XLOC_001673	XLOC_001673	DBT	TSS2003	chr1:100652477-100715409	2.6851	1.92831	3.44189	4.33061	3.1615	5.49972	2.7816	1.9927	3.57051	3.61493	2.62884	4.60102
XLOC_001674	XLOC_001674	LOC100128787	TSS2004	chr1:101092605-101112560	0	0	0	0	0	0	0	0	0	0	0	0
XLOC_001675	XLOC_001675	EXTL2	TSS2005	chr1:101337927-101360735	4.24142	2.82137	5.66147	3.60148	2.34341	4.85956	3.53769	2.3065	4.76888	2.95882	1.89578	4.02185
XLOC_001676	XLOC_001676	DPH5	TSS2006	chr1:101455179-101491362	5.2523	3.32876	7.17584	2.23733	1.18165	3.29302	5.67664	3.62628	7.727	5.0361	3.17313	6.89906
XLOC_001677	XLOC_001677	RNU6-6	TSS2007	chr1:101806424-101806451	0	0	0	0	0	0	0	0	0	0	0	0
XLOC_001678	XLOC_001678	OLFM3	TSS2008	chr1:102268126-102462790	0	0	0	0	0	0	0	0	0	0	0	0
XLOC_001679	XLOC_001679	COL11A1	TSS2009	chr1:103342022-103574052	0.572227	0.286972	0.857481	1.18936	0.698379	1.68034	1.54464	0.960371	2.12891	1.56284	0.957459	2.16821
XLOC_001680	XLOC_001680	AMY1A	TSS2010,TSS2011	chr1:104230039-104239073	0	0	0	0	0	0	0	0	0	0	0	0
XLOC_001681	XLOC_001681	VAV3	TSS2012,TSS2013	chr1:108113781-108537229	1.07911	0.560869	1.59736	1.31138	0.67113	1.95162	1.68365	0.994517	2.37277	0.693594	0.290797	1.09639
XLOC_001682	XLOC_001682	SLC25A24	TSS2014,TSS2015	chr1:108677343-108742980	21.327	16.0034	26.6506	40.8148	30.8053	50.8243	24.8209	18.681	30.9608	15.1587	11.1724	19.1449
XLOC_001683	XLOC_001683	NBPF4	TSS2016	chr1:108765962-108786703	0	0	0	0	0	0	0	0	0	0	0	0
XLOC_001684	XLOC_001684	HENMT1	TSS2017,TSS2018	chr1:109190909-109204148	10.6279	7.22376	14.0321	8.89577	5.92518	11.8664	6.73413	4.39007	9.07819	6.18554	3.99774	8.37335
XLOC_001685	XLOC_001685	AKNAD1	TSS2019,TSS2020	chr1:109358519-109401146	0	0	0	0	0	0	0	0	0	0	0	0
XLOC_001686	XLOC_001686	CLCC1	TSS2021	chr1:109419602-109506111	10.1219	6.6451	13.5987	16.3358	10.9542	21.7174	9.77295	6.39212	13.1538	8.11254	5.20209	11.023
XLOC_001687	XLOC_001687	WDR47	TSS2022	chr1:109512837-109584850	5.644	3.99526	7.29275	4.60892	3.18972	6.02812	2.4689	1.61683	3.32097	3.14408	2.1006	4.18755
XLOC_001688	XLOC_001688	TAF13	TSS2023	chr1:109606997-109618624	133.517	96.5374	170.497	137.442	99.2701	175.614	136.688	98.7491	174.626	129.439	93.3459	165.532
XLOC_001689	XLOC_001689	C1orf194	TSS2024	chr1:109648572-109656479	0	0	0	0	0	0	0	0	0	0	0	0
XLOC_001690	XLOC_001690	PSRC1	TSS2025	chr1:109822175-109825790	28.5218	20.7087	36.3349	25.1448	18.228	32.0616	25.4605	18.4507	32.4703	31.7408	23.2253	40.2562
XLOC_001691	XLOC_001691	MYBPHL	TSS2026	chr1:109834986-109849663	0.205759	0	0.473419	0.0655959	0	0.233887	0.370195	0.017925	0.722465	0.339172	0	0.704435
XLOC_001692	XLOC_001692	SORT1	TSS2027,TSS2028	chr1:109852187-109940563	18.0744	13.5942	22.5546	19.5392	14.6904	24.3879	18.7248	14.126	23.3237	12.3903	9.26476	15.5159
XLOC_001693	XLOC_001693	PSMA5	TSS2029	chr1:109941652-109969108	24.2585	18.1186	30.3984	30.0057	22.4151	37.5963	22.3401	16.6042	28.0759	29.1632	21.8707	36.4556
XLOC_001694	XLOC_001694	AMIGO1	TSS2030	chr1:110049445-110052336	0.903562	0.397798	1.40933	1.09913	0.528098	1.67016	0.477488	0.149128	0.805848	0.335553	0.076003	0.595102
XLOC_001695	XLOC_001695	GNAT2	TSS2031	chr1:110145888-110155705	0.0672222	0	0.19453	0.249366	0	0.553267	0.132158	0	0.35908	0.0532498	0	0.213261
XLOC_001696	XLOC_001696	GSTM3	TSS2032	chr1:110276553-110283660	10.0416	7.29579	12.7873	11.814	8.61073	15.0172	5.71289	3.9975	7.42828	12.9647	9.52603	16.4035
XLOC_001697	XLOC_001697	EPS8L3	TSS2033	chr1:110292701-110306644	0	0	0	0	0	0	0	0	0	0.0157242	0	0.135735
XLOC_001698	XLOC_001698	ALX3	TSS2034	chr1:110602996-110613322	0.609058	0.126086	1.09203	0.358243	0.0324279	0.684057	0.457703	0.0624426	0.852963	0.628975	0.124365	1.13358
XLOC_001699	XLOC_001699	LOC440600	TSS2035	chr1:110828998-110881793	0.0298444	0	0.0912654	0.0265152	0	0.0848028	0.0605737	0	0.149908	0.0511273	0	0.138482
XLOC_001700	XLOC_001700	SLC16A4	TSS2036	chr1:110905472-110933704	1.93947	1.09274	2.78619	0.854854	0.370263	1.33944	1.72375	0.929257	2.51825	1.17648	0.560013	1.79295
XLOC_001701	XLOC_001701	LAMTOR5	TSS2037	chr1:110943876-110950546	83.5681	61.464	105.672	71.4102	52.1581	90.6624	69.3786	50.7116	88.0456	77.0961	56.4786	97.7136
XLOC_001702	XLOC_001702	KCNA10	TSS2038	chr1:111059838-111061797	0	0	0	0	0	0	0	0	0	0	0	0
XLOC_001703	XLOC_001703	KCNA2	TSS2039,TSS2040	chr1:111136201-111174096	0	0	0	0	0	0	0	0	0	0	0	0
XLOC_001704	XLOC_001704	KCNA3	TSS2041	chr1:111214309-111217655	0	0	0	0	0	0	0	0	0	0	0	0
XLOC_001705	XLOC_001705	LRIF1	TSS2042	chr1:111489811-111506566	9.53354	6.58988	12.4772	12.2952	8.52285	16.0675	13.6405	9.71528	17.5658	9.83768	6.64576	13.0296
XLOC_001706	XLOC_001706	DRAM2	TSS2043	chr1:111659953-111727724	16.4626	11.056	21.8692	18.4561	12.188	24.7243	14.0701	9.23624	18.904	18.1605	11.9893	24.3317
XLOC_001707	XLOC_001707	DENND2D	TSS2044,TSS2045	chr1:111728590-111747160	9.0264	6.42968	11.6231	5.31601	3.62898	7.00304	8.89915	6.34841	11.4499	9.38131	6.70154	12.0611
XLOC_001708	XLOC_001708	PGCP1	TSS2046	chr1:111927140-111932473	0	0	0	0	0	0	0	0	0	0	0	0
XLOC_001709	XLOC_001709	OVGP1	TSS2047	chr1:111956936-111970399	0.0963823	0	0.228671	0.109889	0	0.236324	0.0519293	0	0.137912	0.121986	0	0.264503
XLOC_001710	XLOC_001710	WDR77	TSS2048	chr1:111982511-112004525	14.2659	6.25871	22.2732	11.3011	3.57581	19.0263	13.3721	5.96547	20.7787	16.117	7.27306	24.961
XLOC_001711	XLOC_001711	ADORA3	TSS2049,TSS2050	chr1:112025969-112106597	0.0222525	0	0.145391	0	0	0	0.0548827	0	0.19826	0	0	0
XLOC_001712	XLOC_001712	LOC100129269	TSS2051	chr1:112141628-112150940	0.0424807	0	0.149777	0.033731	0	0.138805	0.0429585	0	0.141342	0	0	0
XLOC_001713	XLOC_001713	FAM212B	TSS2052,TSS2053	chr1:112264685-112310199	0.647892	0.167169	1.12862	0.420345	0.0391909	0.801499	0.696237	0.169068	1.22341	0.504506	0.0630915	0.945921
XLOC_001714	XLOC_001714	KCND3	TSS2054	chr1:112318453-112531777	0	0	0	0	0	0	0	0	0	0	0	0
XLOC_001715	XLOC_001715	MIR4256	TSS2055	chr1:113004391-113004455	0	0	0	0	0	0	0	0	0	0	0	0
XLOC_001716	XLOC_001716	ST7L	TSS2056	chr1:113066140-113162040	3.09179	1.82405	4.35954	4.40808	2.75323	6.06293	3.17894	1.89121	4.46668	3.75265	2.29112	5.21418
XLOC_001717	XLOC_001717	RHOC	TSS2057,TSS2058	chr1:113243748-113250025	239.264	185.021	293.506	135.789	103.814	167.763	234.243	181.519	286.967	272.433	209.215	335.651
XLOC_001718	XLOC_001718	PPM1J	TSS2059	chr1:113252615-113257950	0.948118	0.344175	1.55206	1.36949	0.611061	2.12791	0.961921	0.358427	1.56541	1.10694	0.437533	1.77636
XLOC_001719	XLOC_001719	SLC16A1	TSS2060,TSS2061	chr1:113454469-113498975	19.0151	14.1907	23.8395	22.0975	16.5625	27.6326	5.37923	3.80544	6.95303	22.958	17.167	28.7489
XLOC_001720	XLOC_001720	LOC643441	TSS2062	chr1:113739403-113748875	0	0	0	0	0	0	0	0	0	0	0	0
XLOC_001721	XLOC_001721	PHTF1	TSS2063	chr1:114239823-114301777	5.23884	3.57318	6.90449	6.29615	4.36134	8.23096	4.80549	3.25208	6.3589	4.48699	3.02659	5.9474
XLOC_001722	XLOC_001722	RSBN1	TSS2064	chr1:114304453-114355070	2.46363	1.70162	3.22563	1.68181	1.09656	2.26705	1.94193	1.30195	2.58192	2.16241	1.45939	2.86543
XLOC_001723	XLOC_001723	PTPN22	TSS2065	chr1:114356432-114447741	0.0224155	0	0.130621	0.163977	0	0.543181	0.0647695	0	0.230093	0.04433	0	0.199885
XLOC_001724	XLOC_001724	BCL2L15	TSS2066	chr1:114356432-114447741	0.192107	0	0.411045	0.638512	0.0845386	1.19248	0.21317	0	0.437401	0.206773	0	0.426898
XLOC_001725	XLOC_001725	AP4B1	TSS2067,TSS2068	chr1:114356432-114447741	3.20177	1.92406	4.47948	4.76013	2.71556	6.8047	2.60732	1.53676	3.67787	3.14698	1.89969	4.39427
XLOC_001726	XLOC_001726	SYT6	TSS2069,TSS2070	chr1:114631913-114696472	0	0	0	0	0	0	0	0	0	0	0	0
XLOC_001727	XLOC_001727	TRIM33	TSS2071	chr1:114935398-115053781	8.04498	6.02429	10.0657	9.41639	7.02839	11.8044	7.47208	5.55679	9.38737	7.19303	5.3303	9.05577
XLOC_001728	XLOC_001728	BCAS2	TSS2072	chr1:115110180-115124265	45.0799	32.8681	57.2916	44.61	32.553	56.667	38.4425	27.9157	48.9693	44.7423	32.6089	56.8758
XLOC_001729	XLOC_001729	DENND2C	TSS2073	chr1:115127195-115212732	0.615495	0.271275	0.959714	0.733875	0.346156	1.12159	0.923094	0.477264	1.36892	0.625189	0.288734	0.961644
XLOC_001730	XLOC_001730	AMPD1	TSS2074	chr1:115215719-115238239	0.021654	0	0.0896056	0.0120002	0	0.0833201	0	0	0	0	0	0
XLOC_001731	XLOC_001731	CSDE1,NRAS	TSS2075,TSS2076	chr1:115247084-115300671	122.242	90.9441	153.539	179.692	132.667	226.717	147.119	109.664	184.575	146.715	108.214	185.215
XLOC_001732	XLOC_001732	SIKE1	TSS2077	chr1:115312104-115323308	8.95717	6.62368	11.2907	5.40547	3.86485	6.94609	9.92374	7.3711	12.4764	7.96964	5.83737	10.1019
XLOC_001733	XLOC_001733	TSPAN2	TSS2078	chr1:115590632-115632121	2.20385	1.36909	3.03861	1.07973	0.561216	1.59825	4.70963	3.20787	6.21139	3.6744	2.42693	4.92186
XLOC_001734	XLOC_001734	NGF	TSS2079	chr1:115828536-115880857	0.785257	0.126035	1.44448	0.274268	0	0.63276	0.346673	0	0.747362	0.84701	0.144441	1.54958
XLOC_001735	XLOC_001735	CASQ2	TSS2080	chr1:116242625-116311426	0.0264426	0	0.083701	0.0084294	0	0.0479922	0.0835335	0	0.188617	0.0388646	0	0.109865
XLOC_001736	XLOC_001736	NHLH2	TSS2081,TSS2082	chr1:116378998-116383747	0	0	0	0	0	0	0	0	0	0	0	0
XLOC_001737	XLOC_001737	ATP1A1OS	TSS2083	chr1:116915794-116961244	66.0578	0	132.303	47.372	0	97.342	57.3108	0	116.531	65.1776	0	132.964
XLOC_001738	XLOC_001738	CD58	TSS2084	chr1:117057155-117113715	6.04705	3.69898	8.39513	4.10282	2.31384	5.89181	4.65147	2.72379	6.57916	5.33151	3.19023	7.47278
XLOC_001739	XLOC_001739	IGSF3	TSS2085	chr1:117117030-117210314	3.20624	2.25919	4.1533	3.0327	2.1164	3.94899	3.95274	2.81425	5.09122	1.83813	1.22525	2.451
XLOC_001740	XLOC_001740	TRIM45	TSS2086	chr1:117653676-117664411	1.32064	0.740597	1.90068	2.16272	1.34928	2.97616	1.11501	0.601828	1.62819	0.927133	0.481432	1.37283
XLOC_001741	XLOC_001741	VTCN1	TSS2087,TSS2088	chr1:117686208-117753582	94.736	71.4432	118.029	98.517	74.7022	122.332	84.9968	64.191	105.803	77.2833	58.7196	95.847
XLOC_001742	XLOC_001742	GDAP2	TSS2089	chr1:118406106-118472302	6.00624	3.83917	8.17332	4.43492	2.73743	6.1324	4.61071	2.83949	6.38193	5.19352	3.14112	7.24592
XLOC_001743	XLOC_001743	SPAG17	TSS2090	chr1:118472371-118727848	0.0671409	0	0.235627	0.0570259	0	0.208304	0.0863835	0	0.279729	0.0386051	0	0.171418
XLOC_001744	XLOC_001744	TBX15	TSS2091	chr1:119425665-119532179	0.0593942	0	0.13819	0.0327453	0	0.0898416	0.0728879	0	0.159711	0.0298395	0	0.0866635
XLOC_001745	XLOC_001745	WARS2	TSS2092	chr1:119573838-119683295	5.76783	3.91184	7.62382	4.34818	2.81728	5.87909	4.98044	3.32236	6.63852	4.76027	3.1388	6.38175
XLOC_001746	XLOC_001746	LINC00622	TSS2093	chr1:120140324-120141914	0.0971262	0	0.250101	0.0658098	0	0.190959	0.187014	0	0.408857	0.119612	0	0.292522
XLOC_001747	XLOC_001747	ZNF697	TSS2094	chr1:120161999-120190390	1.47865	0.903239	2.05406	1.19301	0.704365	1.68166	1.95346	1.25342	2.65351	0.810754	0.438145	1.18336
XLOC_001748	XLOC_001748	HMGCS2	TSS2095	chr1:120290618-120311555	0	0	0	0	0	0	0	0	0	0	0	0
XLOC_001749	XLOC_001749	REG4	TSS2096	chr1:120336640-120354203	0.046226	0	0.246852	0	0	0	0	0	0	0.022474	0	0.206344
XLOC_001750	XLOC_001750	NBPF7	TSS2097	chr1:120377387-120387779	0	0	0	0	0	0	0	0	0	0	0	0
XLOC_001751	XLOC_001751	ADAM30	TSS2098	chr1:120436155-120439147	0	0	0	0	0	0	0	0	0	0	0	0
XLOC_001752	XLOC_001752	NOTCH2	TSS2099	chr1:120454175-120612317	34.9989	26.4213	43.5764	31.1113	23.5695	38.653	32.5451	24.6476	40.4426	29.7939	22.4755	37.1122
XLOC_001753	XLOC_001753	FCGR1B	TSS2100	chr1:120926127-120935944	0	0	0	0	0	0	0	0	0	0	0	0
XLOC_001754	XLOC_001754	ANKRD20A12P	TSS2101	chr1:142697420-142713605	0.0574911	0	0.174765	0.0612077	0	0.188336	0.0353144	0	0.125117	0	0	0
XLOC_001755	XLOC_001755	LOC100286793	TSS2102,TSS2103	chr1:143718512-143744587	0.163128	0	0.43192	0.317811	0	0.689858	0.425884	0	0.860677	0.522222	0.0230946	1.02135
XLOC_001756	XLOC_001756	PPIAL4G	TSS2104	chr1:143767143-143767881	0.0443692	0	0.215785	0.324605	0	0.751982	0.185661	0	0.509536	0.114996	0	0.382171
XLOC_001757	XLOC_001757	FAM72D	TSS2105	chr1:143896451-143913143	0.948405	0.419838	1.47697	1.21456	0.58208	1.84703	0.74921	0.304961	1.19346	0.631863	0.239576	1.02415
XLOC_001758	XLOC_001758	LINC00623,LOC728875	TSS2106,TSS2107	chr1:144300511-144341755	0	0	0	0	0	0	0	0	0	0	0	0
XLOC_001759	XLOC_001759	PPIAL4B	TSS2108	chr1:144363461-144364246	0	0	0	0	0	0	0	0	0	0	0	0
XLOC_001760	XLOC_001760	LOC728875	TSS2109	chr1:144480745-144521969	0.0593668	0	0.234204	0	0	0	0.122994	0	0.410277	0.192163	0	0.548293
XLOC_001761	XLOC_001761	PFN1P2	TSS2110	chr1:144610814-144612727	0.0273667	0	0.10486	0	0	0	0	0	0	0.0141237	0	0.0705301
XLOC_001762	XLOC_001762	LOC653513	TSS2111	chr1:144614958-144828810	0.0390368	0	0.247804	0	0	0	0	0	0	0	0	0
XLOC_001763	XLOC_001763	PDE4DIP	TSS2112,TSS2113,TSS2114,TSS2115,TSS2116	chr1:144851423-145076186	20.5268	15.0782	25.9753	17.5257	12.717	22.3344	22.3565	16.5619	28.1511	20.4954	15.1859	25.8049
XLOC_001764	XLOC_001764	POLR3GL	TSS2117	chr1:145456235-145470387	15.6864	10.8144	20.5583	23.4932	16.9008	30.0856	18.7009	13.2321	24.1697	17.4012	12.1263	22.6762
XLOC_001765	XLOC_001765	GNRHR2	TSS2118	chr1:145507556-145516076	2.79368	0.933321	4.65405	4.85046	1.55066	8.15027	4.44913	1.36872	7.52954	4.77902	1.54901	8.00904
XLOC_001766	XLOC_001766	NUDT17	TSS2119	chr1:145575987-145589435	2.65276	0	7.5893	3.11131	0	8.87836	2.25719	0	6.18878	2.99992	0	6.636
XLOC_001767	XLOC_001767	POLR3C	TSS2120	chr1:145592604-145610884	35.5797	26.2953	44.8641	42.39	31.5071	53.2729	40.2124	29.8719	50.553	36.9877	27.3654	46.61
XLOC_001768	XLOC_001768	CD160	TSS2121	chr1:145695797-145715565	0.160964	0	0.363637	0.0743618	0	0.19854	0.089639	0	0.237351	0.213986	0	0.442641
XLOC_001769	XLOC_001769	GPR89A	TSS2122	chr1:145764594-145827103	2.59853	1.4973	3.69977	2.45198	1.3561	3.54786	3.5162	2.1227	4.90969	3.49997	2.13238	4.86755
XLOC_001770	XLOC_001770	PDZK1P1	TSS2123	chr1:145924387-145942619	0	0	0	0	0	0	0	0	0	0	0	0
XLOC_001771	XLOC_001771	NBPF11,NBPF24	TSS2124,TSS2125,TSS2126	chr1:146032541-146082765	0	0	0	0	0	0	0.00415219	0	0.0477759	0	0	0
XLOC_001772	XLOC_001772	LOC728989	TSS2127	chr1:146490894-146514599	0.111576	0	0.328636	0.0842721	0	0.264069	0.072058	0	0.234159	0.0304444	0	0.147604
XLOC_001773	XLOC_001773	PRKAB2	TSS2128	chr1:146626684-146644129	7.69525	5.61762	9.77287	6.8783	4.98538	8.77123	12.7336	9.4608	16.0064	6.76564	4.91517	8.61611
XLOC_001774	XLOC_001774	FMO5	TSS2129	chr1:146655883-146697230	0.109148	0	0.279887	0.108749	0	0.261049	0.147389	0	0.319907	0.0385047	0	0.16628
XLOC_001775	XLOC_001775	LINC00624	TSS2130	chr1:146853913-146989699	0.0181823	0	0.0546731	0.0117768	0	0.03889	0.0168737	0	0.0584022	0.0123884	0	0.0496486
XLOC_001776	XLOC_001776	ACP6	TSS2131	chr1:147119167-147142634	10.5782	7.1965	13.9599	10.3034	7.04873	13.558	11.3099	7.75071	14.8692	6.92306	4.47258	9.37355
XLOC_001777	XLOC_001777	GJA5	TSS2132,TSS2133	chr1:147228331-147245484	0.0271161	0	0.0968567	0.0139022	0	0.0580644	0.0589229	0	0.144788	0.0324404	0	0.0990718
XLOC_001778	XLOC_001778	PDZK1P1	TSS2134	chr1:147466093-147484331	0	0	0	0	0	0	0	0	0	0	0	0
XLOC_001779	XLOC_001779	NBPF11,NBPF24	TSS2135,TSS2136,TSS2137	chr1:147574322-147624601	0	0	0	0.00419406	0	0.0467469	0	0	0	0	0	0
XLOC_001780	XLOC_001780	MIR5087	TSS2138	chr1:147806602-147806678	0	0	0	0	0	0	0	0	0	0	0	0
XLOC_001781	XLOC_001781	FLJ39739	TSS2139	chr1:147906021-147931980	0	0	0	0	0	0	0	0	0	0	0	0
XLOC_001782	XLOC_001782	PPIAL4B	TSS2140	chr1:147954634-147955419	0	0	0	0	0	0	0	0	0	0	0	0
XLOC_001783	XLOC_001783	NBPF14	TSS2141	chr1:148003641-148025848	1.31763	0.732992	1.90227	1.11475	0.594956	1.63455	1.35473	0.763715	1.94574	1.52097	0.866314	2.17563
XLOC_001784	XLOC_001784	PPIAL4D	TSS2142	chr1:148201751-148202536	0	0	0	0	0	0	0	0	0	0	0	0
XLOC_001785	XLOC_001785	HIST2H2BF	TSS2143	chr1:149754244-149783928	0.510178	0	1.24519	0.412642	0	1.07465	0.551551	0	1.28525	0.565775	0	1.34056
XLOC_001786	XLOC_001786	HIST2H3D	TSS2144	chr1:149784779-149785236	0.0987045	0	0.391792	0	0	0	0	0	0	0.0608651	0	0.317546
XLOC_001787	XLOC_001787	HIST2H3A	TSS2145	chr1:149812258-149812765	0	0	0	0	0	0	0	0	0	0	0	0
XLOC_001788	XLOC_001788	HIST2H2AA3	TSS2146	chr1:149813784-149814318	0	0	0	0	0	0	0	0	0	0	0	0
XLOC_001789	XLOC_001789	HIST2H2BC	TSS2147	chr1:149821758-149822340	0.99103	0	2.13433	1.12762	0	2.34077	0.837636	0	1.89055	0.746979	0	1.67569
XLOC_001790	XLOC_001790	HIST2H4A	TSS2148	chr1:149832329-149832725	0	0	0	0	0	0	0	0	0	0	0	0
XLOC_001791	XLOC_001791	HIST2H2BE	TSS2149	chr1:149856009-149858232	0.745624	0.266722	1.22453	0.776781	0.291647	1.26191	1.08269	0.476681	1.6887	0.807653	0.32555	1.28976
XLOC_001792	XLOC_001792	HIST2H2AB	TSS2150	chr1:149859018-149859466	0	0	0	0.299379	0	0.847878	0	0	0	0	0	0
XLOC_001793	XLOC_001793	SV2A	TSS2151	chr1:149874871-149889434	10.6272	7.83307	13.4214	12.0436	9.00409	15.0832	10.3639	7.66332	13.0644	9.46847	6.94089	11.996
XLOC_001794	XLOC_001794	SF3B4	TSS2152	chr1:149895208-149900144	107.378	81.0317	133.724	125.88	95.4864	156.273	112.869	85.5012	140.237	127.715	96.5528	158.876
XLOC_001795	XLOC_001795	MTMR11	TSS2153,TSS2154	chr1:149900542-149908791	3.77231	2.43804	5.10659	2.59941	1.64551	3.55331	4.48226	2.98924	5.97528	4.76595	3.19712	6.33477
XLOC_001796	XLOC_001796	OTUD7B	TSS2155	chr1:149912231-149982686	10.1702	7.54924	12.7911	8.86406	6.58566	11.1425	12.8177	9.59836	16.0371	11.2614	8.38937	14.1334
XLOC_001797	XLOC_001797	ANP32E	TSS2156,TSS2157	chr1:150190716-150208504	95.5367	72.4366	118.637	120.648	91.2008	150.095	112.134	84.4096	139.858	101.258	74.6878	127.829
XLOC_001798	XLOC_001798	APH1A	TSS2158	chr1:150237798-150241609	97.7045	74.1397	121.269	84.9407	65.1635	104.718	99.0764	76.0433	122.109	112.903	86.406	139.4
XLOC_001799	XLOC_001799	MCL1	TSS2159	chr1:150547026-150552214	88.3166	66.7733	109.86	103.346	78.0419	128.65	120.066	90.9054	149.227	114.504	86.7271	142.281
XLOC_001800	XLOC_001800	ENSA	TSS2160,TSS2161	chr1:150594598-150602098	270.207	202.009	338.404	280.001	211.179	348.823	163.074	122.056	204.092	340.871	257.546	424.196
XLOC_001801	XLOC_001801	GOLPH3L	TSS2162	chr1:150618700-150669672	35.22	26.4483	43.9916	19.1993	14.1933	24.2052	28.021	20.9344	35.1076	30.8185	23.1674	38.4695
XLOC_001802	XLOC_001802	HORMAD1	TSS2163	chr1:150670534-150693364	1.038	0.409779	1.66621	1.30169	0.552524	2.05086	1.22295	0.526541	1.91937	0.648685	0.211656	1.08571
XLOC_001803	XLOC_001803	CTSS	TSS2164	chr1:150702671-150738433	2.89046	1.90487	3.87606	3.04516	1.99073	4.09958	4.93366	3.44636	6.42096	3.54653	2.39546	4.6976
XLOC_001804	XLOC_001804	CTSK	TSS2165	chr1:150768683-150780917	1.28217	0.574582	1.98976	1.09486	0.472456	1.71726	1.17659	0.511581	1.84159	0.563872	0.164411	0.963333
XLOC_001805	XLOC_001805	ARNT	TSS2166	chr1:150782180-150849244	21.6311	16.2611	27.0011	33.7449	25.5409	41.949	25.0253	18.8528	31.1978	18.3363	13.7851	22.8875
XLOC_001806	XLOC_001806	CERS2	TSS2167	chr1:150937648-150947479	79.3138	60.2071	98.4206	68.4846	51.842	85.1272	77.8534	59.1825	96.5243	92.2243	70.1775	114.271
XLOC_001807	XLOC_001807	FAM63A	TSS2168,TSS2169,TSS2170	chr1:150969300-150980854	6.39685	4.17073	8.62297	4.78972	3.01194	6.56751	7.56322	5.03317	10.0933	4.2476	2.60245	5.89275
XLOC_001808	XLOC_001808	CDC42SE1	TSS2171	chr1:151020258-151032125	68.3695	51.559	85.18	49.812	37.2659	62.3581	63.0393	47.5353	78.5433	53.5396	40.5046	66.5745
XLOC_001809	XLOC_001809	SEMA6C	TSS2172	chr1:151104162-151119140	1.36826	0.766802	1.96971	2.65155	1.6806	3.6225	0.862694	0.433295	1.29209	0.739985	0.340264	1.13971
XLOC_001810	XLOC_001810	LYSMD1	TSS2173	chr1:151129104-151148547	6.2081	2.89462	9.52159	8.43678	4.32989	12.5437	8.13763	4.24292	12.0323	7.37797	3.53469	11.2213
XLOC_001811	XLOC_001811	TMOD4	TSS2174	chr1:151129104-151148547	0.0528049	0	0.510827	0.0841299	0	0.699044	0.0873029	0	0.645684	0.104405	0	0.672524
XLOC_001812	XLOC_001812	VPS72	TSS2175	chr1:151148775-151162689	59.374	44.4059	74.342	58.9869	44.5679	73.4059	59.2733	44.8875	73.6591	63.4101	47.8818	78.9385
XLOC_001813	XLOC_001813	PI4KB	TSS2176	chr1:151254790-151300191	31.3615	21.794	40.9291	27.1215	18.3249	35.918	33.7502	23.782	43.7185	26.1201	17.9856	34.2546
XLOC_001814	XLOC_001814	RFX5	TSS2177	chr1:151313115-151319769	19.0669	14.216	23.9178	14.2379	10.5038	17.972	17.2497	12.7556	21.7438	20.691	15.4263	25.9557
XLOC_001815	XLOC_001815	SELENBP1	TSS2178	chr1:151336777-151345210	4.90575	2.91811	6.89338	6.33517	3.93068	8.73966	7.04997	4.48866	9.61128	3.52189	1.94508	5.0987
XLOC_001816	XLOC_001816	POGZ	TSS2179,TSS2180	chr1:151375199-151431941	12.7666	9.4344	16.0988	15.5176	11.6548	19.3805	11.0879	8.25564	13.9202	8.62507	6.31294	10.9372
XLOC_001817	XLOC_001817	CELF3	TSS2181,TSS2182	chr1:151672533-151689290	0	0	0	0	0	0	0	0	0	0.0050831	0	0.0465108
XLOC_001818	XLOC_001818	MRPL9	TSS2183	chr1:151732122-151743806	78.7611	58.4659	99.0564	53.8051	39.3523	68.258	74.9158	55.4135	94.418	86.3416	63.9555	108.728
XLOC_001819	XLOC_001819	TDRKH	TSS2184	chr1:151744040-151763010	25.4475	18.7876	32.1074	25.8378	19.0575	32.618	20.3918	14.9295	25.8541	25.3971	18.7892	32.005
XLOC_001820	XLOC_001820	LINGO4	TSS2185	chr1:151772764-151777882	0	0	0	0.0117173	0	0.0589982	0.00758016	0	0.0464257	0.00977868	0	0.0499654
XLOC_001821	XLOC_001821	RORC	TSS2186,TSS2187	chr1:151778546-151804348	2.9472	1.85139	4.043	3.99538	2.59025	5.40052	5.52554	3.76355	7.28753	3.0561	1.9161	4.19609
XLOC_001822	XLOC_001822	C2CD4D	TSS2188	chr1:151810338-151816641	0.384562	0	0.777055	0.510078	0.0814984	0.938657	0.376067	0.0111129	0.74102	0.717298	0.175166	1.25943
XLOC_001823	XLOC_001823	THEM5	TSS2189	chr1:151819576-151826173	0	0	0	0.0878694	0	0.264788	0.301748	0	0.660015	0.0558195	0	0.200278
XLOC_001824	XLOC_001824	THEM4	TSS2190	chr1:151843342-151882361	1.6147	1.02208	2.20732	1.29373	0.792639	1.79482	1.4575	0.912565	2.00243	1.27345	0.780204	1.7667
XLOC_001825	XLOC_001825	S100A10	TSS2191	chr1:151955385-151966714	287.771	218.02	357.523	36.728	26.907	46.549	415.241	315.266	515.216	276.162	211.024	341.299
XLOC_001826	XLOC_001826	S100A11	TSS2192	chr1:152004981-152009511	1267.68	957.185	1578.17	799.866	607.209	992.524	1309.84	989.733	1629.95	1516.3	1142.47	1890.13
XLOC_001827	XLOC_001827	TCHHL1	TSS2193	chr1:152056619-152061540	0	0	0	0.00754687	0	0.0398751	0.00701994	0	0.0388409	0	0	0
XLOC_001828	XLOC_001828	TCHH	TSS2194	chr1:152078792-152087930	0.00496343	0	0.0234891	0	0	0	0.0155794	0	0.0469252	0.0126451	0	0.0397795
XLOC_001829	XLOC_001829	RPTN	TSS2195	chr1:152126070-152131704	0	0	0	0	0	0	0	0	0	0.0083111	0	0.0399664
XLOC_001830	XLOC_001830	HRNR	TSS2196	chr1:152184551-152196672	0	0	0	0	0	0	0.00427614	0	0.0194706	0.00261715	0	0.0134288
XLOC_001831	XLOC_001831	FLG	TSS2197	chr1:152274650-152297679	0.00173928	0	0.0100131	0	0	0	0.00246474	0	0.0129449	0	0	0
XLOC_001832	XLOC_001832	FLG2	TSS2198	chr1:152321212-152332482	0	0	0	0	0	0	0.00389271	0	0.0192186	0	0	0
XLOC_001833	XLOC_001833	CRNN	TSS2199	chr1:152381718-152386750	0	0	0	0	0	0	0	0	0	0	0	0
XLOC_001834	XLOC_001834	LCE3E	TSS2200	chr1:152538174-152539229	0	0	0	0	0	0	0	0	0	0	0	0
XLOC_001835	XLOC_001835	LCE3D	TSS2201	chr1:152551859-152552980	0	0	0	0	0	0	0	0	0	0	0	0
XLOC_001836	XLOC_001836	LCE3A	TSS2202	chr1:152595309-152595579	0	0	0	0	0	0	0	0	0	0	0	0
XLOC_001837	XLOC_001837	LCE1C	TSS2203	chr1:152777310-152779107	0	0	0	0	0	0	0	0	0	0	0	0
XLOC_001838	XLOC_001838	SPRR2D	TSS2204	chr1:153012200-153013594	0	0	0	0	0	0	0	0	0	0.0706464	0	0.273822
XLOC_001839	XLOC_001839	SPRR2A	TSS2205	chr1:153028595-153029988	0.0663512	0	0.263878	0.0564855	0	0.255899	0.0504962	0	0.254184	0	0	0
XLOC_001840	XLOC_001840	SPRR2B	TSS2206	chr1:153042717-153044084	0	0	0	0	0	0	0	0	0	0	0	0
XLOC_001841	XLOC_001841	SPRR2E	TSS2207	chr1:153065610-153067001	0.0686988	0	0.268675	0	0	0	0	0	0	0	0	0
XLOC_001842	XLOC_001842	SPRR2F	TSS2208	chr1:153084612-153085989	0	0	0	0	0	0	0	0	0	0	0	0
XLOC_001843	XLOC_001843	SPRR2C	TSS2209	chr1:153112593-153113969	0	0	0	0	0	0	0	0	0	0	0	0
XLOC_001844	XLOC_001844	SPRR2G	TSS2210	chr1:153122057-153123427	0	0	0	0	0	0	0	0	0	0	0	0
XLOC_001845	XLOC_001845	PGLYRP3	TSS2211	chr1:153270337-153283194	0	0	0	0	0	0	0	0	0	0	0	0
XLOC_001846	XLOC_001846	PGLYRP4	TSS2212	chr1:153302596-153321022	0	0	0	0	0	0	0	0	0	0	0	0
XLOC_001847	XLOC_001847	S100A12	TSS2213	chr1:153346183-153348075	0	0	0	0.0970336	0	0.404742	0	0	0	0	0	0
XLOC_001848	XLOC_001848	S100A8	TSS2214	chr1:153362507-153363664	0.354896	0	0.974058	0.223664	0	0.725433	0.334868	0	0.932201	0.0801279	0	0.331424
XLOC_001849	XLOC_001849	S100A7L2	TSS2215	chr1:153409470-153412503	0	0	0	0	0	0	0	0	0	0	0	0
XLOC_001850	XLOC_001850	S100A7	TSS2216	chr1:153430219-153433137	0	0	0	0	0	0	0.171421	0	0.563898	0	0	0
XLOC_001851	XLOC_001851	S100A6	TSS2217	chr1:153507075-153508717	266.736	199.521	333.951	159.346	119.042	199.65	261.939	198.314	325.564	284.618	211.947	357.289
XLOC_001852	XLOC_001852	S100A5	TSS2218	chr1:153509622-153514241	0.725946	0.0469717	1.40492	0.449438	0	0.934644	0.447279	0	0.952559	0.229497	0	0.619244
XLOC_001853	XLOC_001853	S100A4	TSS2219	chr1:153516094-153518282	44.9408	30.6335	59.248	35.0239	23.2874	46.7603	67.1058	47.7211	86.4904	71.9762	51.0576	92.8949
XLOC_001854	XLOC_001854	S100A3	TSS2220	chr1:153519808-153521734	2.50788	0.863587	4.15218	1.54445	0.416256	2.67264	1.9162	0.556188	3.27622	3.47746	1.41433	5.54059
XLOC_001855	XLOC_001855	S100A2	TSS2221	chr1:153533584-153538306	15.9905	11.0316	20.9493	7.20291	4.4161	9.98971	11.6897	7.70799	15.6714	17.6424	12.4332	22.8516
XLOC_001856	XLOC_001856	S100A16	TSS2222	chr1:153579366-153585514	411.66	313.409	509.91	221.769	168.914	274.625	326.397	249.668	403.126	604.368	460.682	748.055
XLOC_001857	XLOC_001857	S100A14	TSS2223	chr1:153586731-153588808	168.595	127.643	209.547	93.4313	70.3738	116.489	161.374	122.383	200.364	181.293	136.965	225.621
XLOC_001858	XLOC_001858	S100A13	TSS2224,TSS2225,TSS2226,TSS2227,TSS2228	chr1:153591275-153618782	419.747	269.482	570.012	404.201	257.132	551.269	305.998	187.256	424.74	449.452	296.589	602.315
XLOC_001859	XLOC_001859	ILF2	TSS2229	chr1:153631129-153643504	420.141	312.405	527.877	347.373	259.36	435.385	326.266	243.079	409.454	390.451	291.124	489.778
XLOC_001860	XLOC_001860	GATAD2B	TSS2230	chr1:153777202-153895451	13.8665	10.3868	17.3463	15.3969	11.5665	19.2272	11.7044	8.7449	14.664	11.901	8.84026	14.9618
XLOC_001861	XLOC_001861	DENND4B	TSS2231	chr1:153901976-153919154	31.6524	23.8954	39.4094	22.2605	16.7576	27.7634	25.8768	19.5538	32.1999	31.2558	23.5942	38.9175
XLOC_001862	XLOC_001862	CRTC2	TSS2232	chr1:153920147-153931132	45.9898	34.7252	57.2545	38.9289	29.2581	48.5997	40.5063	30.4719	50.5406	48.6532	36.7336	60.5729
XLOC_001863	XLOC_001863	SLC39A1	TSS2233,TSS2234,TSS2235,TSS2236,TSS2237	chr1:153931574-153950451	123.266	80.7623	165.77	136.145	93.5218	178.767	153.595	104.823	202.367	118.546	75.1149	161.976
XLOC_001864	XLOC_001864	JTB	TSS2238	chr1:153931574-153950451	193.958	126.157	261.759	167.747	105.132	230.361	182.414	114.823	250.005	225.132	151.154	299.11
XLOC_001865	XLOC_001865	RAB13	TSS2239,TSS2240	chr1:153954092-153958853	277.368	212.902	341.834	290.064	222.753	357.376	252.793	195.528	310.058	306.065	234.651	377.478
XLOC_001866	XLOC_001866	NUP210L	TSS2241	chr1:153965167-154127592	0.27297	0.102728	0.443211	0.16169	0.0397548	0.283625	0.416148	0.189306	0.642989	0.278575	0.108513	0.448636
XLOC_001867	XLOC_001867	TPM3	TSS2242,TSS2243	chr1:154127779-154164609	218.873	164.952	272.795	236.424	177.754	295.093	225.075	169.46	280.69	275.222	206.768	343.676
XLOC_001868	XLOC_001868	MIR190B	TSS2244	chr1:154166140-154166219	0	0	0	0	0	0	0	0	0	0	0	0
XLOC_001869	XLOC_001869	C1orf189	TSS2245	chr1:154171561-154178841	0.0578314	0	0.253371	0.188589	0	0.473341	0.108995	0	0.388022	0.205573	0	0.546333
XLOC_001870	XLOC_001870	C1orf43	TSS2246	chr1:154179182-154243329	181.135	116.146	246.124	111.851	64.2509	159.452	143.499	90.2662	196.732	183.67	119.801	247.54
XLOC_001871	XLOC_001871	SHE	TSS2247	chr1:154451953-154474526	0.170845	0.0492773	0.292413	0.0704528	0.000403391	0.140502	0.171987	0.047983	0.29599	0.127346	0.0283405	0.226351
XLOC_001872	XLOC_001872	UBE2Q1	TSS2248	chr1:154521050-154531120	66.7314	50.5886	82.8742	54.2798	41.268	67.2917	52.9921	40.1652	65.8191	57.2872	43.4882	71.0862
XLOC_001873	XLOC_001873	ADAR	TSS2249,TSS2250,TSS2251	chr1:154554533-154600456	80.3565	60.5995	100.114	70.8824	53.886	87.8788	106.918	80.7367	133.1	77.1497	58.4507	95.8487
XLOC_001874	XLOC_001874	KCNN3	TSS2252,TSS2253	chr1:154669941-154842754	0.17611	0.0793581	0.272862	0.194078	0.0910555	0.2971	0.0736113	0.019513	0.12771	0.119066	0.0438033	0.194329
XLOC_001875	XLOC_001875	PMVK	TSS2254	chr1:154897207-154909484	20.8217	14.923	26.7204	27.8107	20.2661	35.3553	22.5538	16.2815	28.8261	18.318	13.147	23.4891
XLOC_001876	XLOC_001876	PBXIP1	TSS2255	chr1:154916558-154928567	21.0586	15.8578	26.2594	17.5133	13.1439	21.8828	18.7527	14.1549	23.3505	13.0685	9.63979	16.4971
XLOC_001877	XLOC_001877	PYGO2	TSS2256	chr1:154929501-154934258	17.6821	13.086	22.2783	18.7486	14.0126	23.4845	19.1504	14.3246	23.9763	19.2913	14.4389	24.1437
XLOC_001878	XLOC_001878	SHC1	TSS2257,TSS2258	chr1:154934773-154946959	72.8083	55.1311	90.4855	75.2407	57.2423	93.2391	62.0908	47.0346	77.1469	94.1529	71.5809	116.725
XLOC_001879	XLOC_001879	DCST2	TSS2259	chr1:154991002-155006257	0.0142399	0	0.0637276	0.0279418	0	0.0900702	0.0489895	0	0.134511	0.0449761	0	0.128917
XLOC_001880	XLOC_001880	LOC100505666	TSS2260,TSS2261	chr1:155006281-155042029	0.515577	0	2.40486	0.58629	0	2.84162	1.02026	0	4.01232	0.820379	0	3.74267
XLOC_001881	XLOC_001881	DPM3	TSS2262,TSS2263	chr1:155112366-155112996	96.3236	67.3176	125.33	104.037	73.5284	134.546	93.2324	65.4592	121.006	168.972	122.647	215.297
XLOC_001882	XLOC_001882	KRTCAP2	TSS2264	chr1:155141883-155145804	174.521	130.31	218.732	175.584	131.192	219.975	169.353	127.063	211.644	193.98	145.263	242.697
XLOC_001883	XLOC_001883	MUC1	TSS2265	chr1:155158299-155162706	14.7945	10.3517	19.2372	13.7867	9.63885	17.9346	26.7722	19.5349	34.0095	18.6638	13.2956	24.032
XLOC_001884	XLOC_001884	THBS3	TSS2266	chr1:155165378-155177772	2.62167	1.63741	3.60593	2.0879	1.25408	2.92173	2.78758	1.75827	3.81688	2.642	1.62855	3.65545
XLOC_001885	XLOC_001885	GBAP1	TSS2267	chr1:155178489-155197325	1.6756	0.177937	3.17326	2.36455	1.01022	3.71888	1.85457	0.342194	3.36694	2.22588	0.514143	3.93763
XLOC_001886	XLOC_001886	GBA	TSS2268,TSS2269	chr1:155204238-155214653	35.3086	26.3106	44.3066	57.819	43.2677	72.3703	35.6517	26.6235	44.6799	39.6833	29.6405	49.7262
XLOC_001887	XLOC_001887	FAM189B	TSS2270	chr1:155216995-155225274	25.3445	18.854	31.8351	26.4181	19.7276	33.1086	25.6136	19.1622	32.065	28.0929	20.9996	35.1861
XLOC_001888	XLOC_001888	SCAMP3	TSS2271	chr1:155225769-155232176	72.9347	54.8901	90.9793	58.7624	44.0343	73.4905	65.0298	49.159	80.9007	83.063	62.5975	103.528
XLOC_001889	XLOC_001889	CLK2	TSS2272	chr1:155232658-155243281	28.2651	20.805	35.7253	32.081	23.7686	40.3933	21.145	15.4034	26.8867	26.692	19.6302	33.7537
XLOC_001890	XLOC_001890	PKLR	TSS2273,TSS2274	chr1:155247217-155271225	0	0	0	0	0	0	0	0	0	0	0	0
XLOC_001891	XLOC_001891	RUSC1-AS1	TSS2275	chr1:155278538-155300909	26.924	7.10222	46.7457	22.7639	6.23576	39.292	27.545	6.88754	48.2025	26.3723	7.84507	44.8996
XLOC_001892	XLOC_001892	ASH1L,MIR555	TSS2276,TSS2277	chr1:155305051-155533735	15.3828	11.4791	19.2864	14.3719	10.6585	18.0852	9.21105	6.62413	11.798	12.8716	9.44195	16.3013
XLOC_001893	XLOC_001893	YY1AP1	TSS2278,TSS2279,TSS2280	chr1:155629232-155658823	34.2835	25.5307	43.0363	39.8059	29.7743	49.8376	41.4477	30.9853	51.9101	43.2616	32.3862	54.1369
XLOC_001894	XLOC_001894	GON4L	TSS2281	chr1:155715558-155826972	16.7574	12.35	21.1648	17.0682	12.3917	21.7447	13.8732	10.1747	17.5718	14.5592	10.6237	18.4948
XLOC_001895	XLOC_001895	RIT1	TSS2282,TSS2283	chr1:155867598-155881193	17.0685	12.6915	21.4455	23.534	17.6082	29.4598	19.0695	14.1705	23.9684	15.8682	11.6975	20.039
XLOC_001896	XLOC_001896	KIAA0907	TSS2284	chr1:155882835-155904188	21.3629	15.773	26.9528	21.2889	15.7325	26.8453	18.8481	13.8735	23.8227	29.9924	22.4617	37.5232
XLOC_001897	XLOC_001897	SNORA42	TSS2285	chr1:155882835-155904188	0	0	0	0	0	0	0	0	0	4.62557	0	10.0396
XLOC_001898	XLOC_001898	SCARNA4	TSS2286	chr1:155882835-155904188	10.1054	5.42217	14.7887	0	0	0	19.4339	0	206.104	0	0	0
XLOC_001899	XLOC_001899	ARHGEF2	TSS2287,TSS2288	chr1:155916629-155948336	37.0421	27.9476	46.1366	31.0195	23.2694	38.7696	31.3592	23.5664	39.1521	38.393	28.8797	47.9064
XLOC_001900	XLOC_001900	SSR2	TSS2289	chr1:155978838-155990758	278.157	210.959	345.356	237.604	180.331	294.877	232.575	176.288	288.861	320.873	243.694	398.052
XLOC_001901	XLOC_001901	UBQLN4	TSS2290	chr1:156005091-156023516	37.302	28.1123	46.4917	42.7506	32.294	53.2073	52.1394	39.5074	64.7715	59.3712	45.0045	73.7378
XLOC_001902	XLOC_001902	MEX3A	TSS2291	chr1:156041803-156051789	13.6428	10.2281	17.0576	17.9288	13.6074	22.2503	13.4294	10.1268	16.732	13.9222	10.432	17.4124
XLOC_001903	XLOC_001903	PAQR6	TSS2292	chr1:156182778-156217908	0.828024	0	2.17472	0.420516	0	1.2844	0.915337	0	2.13961	0.807553	0	1.97951
XLOC_001904	XLOC_001904	SMG5	TSS2293	chr1:156219014-156252620	53.3986	40.4341	66.3632	44.5533	33.7374	55.3692	55.9198	42.4534	69.3861	53.1724	40.2484	66.0964
XLOC_001905	XLOC_001905	C1orf85	TSS2294	chr1:156262477-156265480	52.5794	39.5954	65.5634	59.9199	45.5335	74.3063	47.2273	35.603	58.8517	47.6701	35.8685	59.4717
XLOC_001906	XLOC_001906	VHLL	TSS2295	chr1:156268414-156269428	0	0	0	0	0	0	0.0266084	0	0.150497	0	0	0
XLOC_001907	XLOC_001907	CCT3	TSS2296	chr1:156278751-156316785	227.27	171.595	282.945	243.795	184.535	303.056	155.201	117.541	192.861	241.071	181.782	300.36
XLOC_001908	XLOC_001908	C1orf61	TSS2297	chr1:156374054-156399184	0	0	0	0	0	0	0.0403974	0	0.199445	0	0	0
XLOC_001909	XLOC_001909	MIR9-1	TSS2298	chr1:156374054-156399184	0	0	0	0	0	0	0	0	0	0	0	0
XLOC_001910	XLOC_001910	MEF2D	TSS2299,TSS2300	chr1:156433512-156470634	11.2664	8.37457	14.1581	11.5989	8.70913	14.4886	12.837	9.58985	16.0842	14.635	10.9408	18.3292
XLOC_001911	XLOC_001911	IQGAP3	TSS2301	chr1:156495196-156542396	17.0825	12.8255	21.3395	11.2415	8.32086	14.1622	14.7119	10.9761	18.4476	17.4251	13.0582	21.7921
XLOC_001912	XLOC_001912	GPATCH4	TSS2302	chr1:156564099-156571279	39.9718	29.8084	50.1351	38.1536	28.4219	47.8853	35.3462	26.1853	44.5071	52.009	38.8982	65.1198
XLOC_001913	XLOC_001913	NES	TSS2303	chr1:156638555-156647189	5.13051	3.57663	6.68439	2.42143	1.61775	3.22512	6.03221	4.35222	7.7122	4.87176	3.42977	6.31374
XLOC_001914	XLOC_001914	CRABP2	TSS2304,TSS2305	chr1:156669399-156675608	183.798	138.783	228.813	148.042	111.315	184.768	236.797	180.33	293.264	214.376	162.057	266.696
XLOC_001915	XLOC_001915	ISG20L2	TSS2306	chr1:156692412-156697705	44.72	33.42	56.02	45.3084	33.9429	56.6739	47.0842	35.1794	58.9889	49.1758	36.7483	61.6034
XLOC_001916	XLOC_001916	MRPL24	TSS2307	chr1:156707093-156710923	133.029	100.997	165.062	164.839	124.917	204.762	123.593	93.6524	153.533	163.624	123.501	203.746
XLOC_001917	XLOC_001917	HDGF	TSS2308,TSS2309,TSS2310	chr1:156711898-156722240	331.828	249.614	414.042	286.824	215.972	357.676	330.634	248.649	412.619	407.131	305.255	509.007
XLOC_001918	XLOC_001918	SH2D2A	TSS2311,TSS2312	chr1:156776034-156851642	4.36011	2.49409	6.22612	3.29204	1.84516	4.73892	5.51591	3.30283	7.72899	3.98392	2.23492	5.73293
XLOC_001919	XLOC_001919	INSRR	TSS2313	chr1:156776034-156851642	0	0	0	0.0104509	0	0.0586468	0.0315644	0	0.121223	0.0123331	0	0.0663979
XLOC_001920	XLOC_001920	ARHGEF11	TSS2314	chr1:156904631-157015162	8.71975	6.46013	10.9794	9.08429	6.70995	11.4586	11.7414	8.73901	14.7438	8.09752	5.94065	10.2544
XLOC_001921	XLOC_001921	MIR765	TSS2315	chr1:156904631-157015162	0	0	0	0	0	0	0	0	0	0	0	0
XLOC_001922	XLOC_001922	ETV3L	TSS2316	chr1:157061834-157069600	0	0	0	0	0	0	0	0	0	0	0	0
XLOC_001923	XLOC_001923	ETV3	TSS2317,TSS2318	chr1:157094458-157108383	11.2864	7.71481	14.858	10.7102	7.3017	14.1187	12.351	8.53484	16.1672	11.2213	7.65833	14.7843
XLOC_001924	XLOC_001924	FCRL5	TSS2319	chr1:157483166-157522310	0	0	0	0	0	0	0	0	0	0	0	0
XLOC_001925	XLOC_001925	FCRL4	TSS2320	chr1:157543538-157567870	0	0	0	0	0	0	0	0	0	0	0	0
XLOC_001926	XLOC_001926	FCRL3	TSS2321	chr1:157647977-157670647	0	0	0	0	0	0	0	0	0	0	0	0
XLOC_001927	XLOC_001927	FCRL2	TSS2322	chr1:157715522-157746922	0.0101428	0	0.050698	0	0	0	0	0	0	0	0	0
XLOC_001928	XLOC_001928	FCRL1	TSS2323	chr1:157764193-157789940	0	0	0	0	0	0	0	0	0	0	0	0
XLOC_001929	XLOC_001929	CD5L	TSS2324	chr1:157800703-157811634	0	0	0	0	0	0	0	0	0	0	0	0
XLOC_001930	XLOC_001930	LOC646268	TSS2325	chr1:158101833-158110430	0	0	0	0	0	0	0	0	0	0	0	0
XLOC_001931	XLOC_001931	CD1B	TSS2326	chr1:158297739-158301321	0	0	0	0	0	0	0	0	0	0	0	0
XLOC_001932	XLOC_001932	OR10T2	TSS2327	chr1:158368311-158369256	0	0	0	0	0	0	0	0	0	0	0	0
XLOC_001933	XLOC_001933	OR10K2	TSS2328	chr1:158389717-158390656	0	0	0	0	0	0	0	0	0	0	0	0
XLOC_001934	XLOC_001934	OR6Y1	TSS2329	chr1:158516917-158517895	0	0	0	0	0	0	0	0	0	0	0	0
XLOC_001935	XLOC_001935	OR6P1	TSS2330	chr1:158532440-158533394	0	0	0	0	0	0	0	0	0	0	0	0
XLOC_001936	XLOC_001936	OR10X1	TSS2331	chr1:158548708-158549689	0	0	0	0	0	0	0	0	0	0	0	0
XLOC_001937	XLOC_001937	SPTA1	TSS2332	chr1:158580495-158656506	0	0	0	0	0	0	0.00614475	0	0.0261158	0	0	0
XLOC_001938	XLOC_001938	OR6K2	TSS2333	chr1:158669467-158670442	0	0	0	0	0	0	0	0	0	0	0	0
XLOC_001939	XLOC_001939	OR6K3	TSS2334	chr1:158686957-158687905	0	0	0	0	0	0	0	0	0	0	0	0
XLOC_001940	XLOC_001940	OR6N1	TSS2335	chr1:158735533-158736472	0	0	0	0	0	0	0	0	0	0	0	0
XLOC_001941	XLOC_001941	OR6N2	TSS2336	chr1:158746471-158747425	0	0	0	0	0	0	0	0	0	0	0	0
XLOC_001942	XLOC_001942	AIM2	TSS2337	chr1:159032274-159046647	0	0	0	0	0	0	0.0162404	0	0.0917329	0.0155806	0	0.0878675
XLOC_001943	XLOC_001943	LOC100131825	TSS2338	chr1:159141376-159172932	0.00761958	0	0.0387504	0	0	0	0.00570483	0	0.036253	0.00699732	0	0.0371402
XLOC_001944	XLOC_001944	OR10J3	TSS2339	chr1:159283459-159284449	0	0	0	0	0	0	0	0	0	0	0	0
XLOC_001945	XLOC_001945	OR10J5	TSS2340	chr1:159504867-159505797	0	0	0	0	0	0	0	0	0	0	0	0
XLOC_001946	XLOC_001946	CRP	TSS2341	chr1:159682078-159684379	0	0	0	0	0	0	0	0	0	0.0114178	0	0.0645212
XLOC_001947	XLOC_001947	C1orf204,VSIG8	TSS2342,TSS2343	chr1:159796478-159832447	0.351953	0.0679404	0.635965	0.616596	0.218966	1.01422	0.465452	0.124933	0.80597	0.26689	0.0373497	0.49643
XLOC_001948	XLOC_001948	CCDC19	TSS2344	chr1:159842153-159869906	0.562799	0.120548	1.00505	0.676167	0.172525	1.17981	0.408586	0.0457173	0.771455	0.674156	0.160531	1.18778
XLOC_001949	XLOC_001949	TAGLN2	TSS2345	chr1:159887902-159895284	494.264	372.187	616.341	494.248	373.593	614.904	609.939	461.139	758.738	679.148	513.013	845.284
XLOC_001950	XLOC_001950	IGSF9	TSS2346	chr1:159896828-159915386	1.07597	0.581554	1.57038	0.149174	0.0237072	0.274641	1.86666	1.13708	2.59624	0.570093	0.245204	0.894982
XLOC_001951	XLOC_001951	SLAMF9	TSS2347	chr1:159921281-159924044	0	0	0	0	0	0	0	0	0	0	0	0
XLOC_001952	XLOC_001952	PIGM	TSS2348	chr1:159997461-160001783	2.76685	1.85069	3.683	2.98347	1.9998	3.96713	2.75565	1.84376	3.66753	2.08802	1.3458	2.83025
XLOC_001953	XLOC_001953	KCNJ10	TSS2349	chr1:160007256-160040051	0.00485701	0	0.0244534	0.00376474	0	0.0225638	0.0111623	0	0.0379806	0.00444854	0	0.0234036
XLOC_001954	XLOC_001954	IGSF8	TSS2350,TSS2351	chr1:160061128-160068618	39.7309	29.5794	49.8824	37.3469	27.8222	46.8716	38.4883	28.7787	48.1979	49.2615	36.836	61.687
XLOC_001955	XLOC_001955	DCAF8	TSS2352	chr1:160185504-160232350	35.3122	26.526	44.0985	31.9702	24.0327	39.9078	35.2004	26.3975	44.0033	22.8555	17.0105	28.7005
XLOC_001956	XLOC_001956	PEX19	TSS2353	chr1:160246598-160254941	21.4467	15.9337	26.9596	33.9936	25.6358	42.3514	18.8276	13.9196	23.7356	37.8097	28.4642	47.1552
XLOC_001957	XLOC_001957	COPA	TSS2354	chr1:160258376-160328742	86.5912	61.3124	111.87	38.3399	26.5016	50.1783	78.218	56.726	99.7099	73.2884	52.2984	94.2785
XLOC_001958	XLOC_001958	SLAMF6	TSS2355	chr1:160454819-160493052	0.0114783	0	0.122922	0	0	0	0.0328066	0	0.130835	0	0	0
XLOC_001959	XLOC_001959	CD84	TSS2356	chr1:160510883-160549306	0	0	0	0	0	0	0	0	0	0	0	0
XLOC_001960	XLOC_001960	SLAMF1	TSS2357	chr1:160579890-160617081	0	0	0	0	0	0	0	0	0	0	0	0
XLOC_001961	XLOC_001961	CD48	TSS2358	chr1:160648535-160681641	0.0211283	0	0.141743	0	0	0	0	0	0	0	0	0
XLOC_001962	XLOC_001962	CD244	TSS2359	chr1:160799949-160832692	0	0	0	0	0	0	0	0	0	0	0	0
XLOC_001963	XLOC_001963	ITLN1	TSS2360	chr1:160846329-160854960	0.0234532	0	0.12294	0	0	0	0	0	0	0	0	0
XLOC_001964	XLOC_001964	ITLN2	TSS2361	chr1:160914815-160924589	0.0213278	0	0.117812	0.0205241	0	0.11513	0	0	0	0	0	0
XLOC_001965	XLOC_001965	F11R	TSS2362	chr1:160965000-160991133	55.9359	42.4035	69.4683	55.6159	42.2251	69.0067	60.5824	45.9046	75.2603	65.9869	50.1003	81.8735
XLOC_001966	XLOC_001966	TSTD1	TSS2363	chr1:161007421-161008774	89.9152	63.4422	116.388	87.3375	61.7526	112.922	80.5087	56.9194	104.098	100.44	71.7609	129.12
XLOC_001967	XLOC_001967	USF1	TSS2364,TSS2365	chr1:161009040-161015769	32.42	23.6523	41.1877	35.2211	25.7935	44.6487	32.6284	23.7997	41.4571	37.0029	27.0926	46.9132
XLOC_001968	XLOC_001968	ARHGAP30	TSS2366	chr1:161016731-161039760	0.205589	0.0500615	0.361116	0.118236	0.00420271	0.23227	0.21193	0.0578137	0.366046	0.238083	0.0658848	0.410281
XLOC_001969	XLOC_001969	PVRL4	TSS2367	chr1:161040780-161059385	3.88183	2.58166	5.182	1.71601	1.01159	2.42043	3.78406	2.52476	5.04337	3.02972	1.95547	4.10397
XLOC_001970	XLOC_001970	PFDN2	TSS2368	chr1:161070345-161102478	224.073	147.601	300.544	170.247	106.884	233.611	171.252	114.085	228.419	171.169	111.434	230.904
XLOC_001971	XLOC_001971	DEDD	TSS2369,TSS2370	chr1:161070345-161102478	23.545	13.1809	33.9091	25.6819	15.0146	36.3492	18.711	10.0814	27.3406	16.4472	8.36593	24.5285
XLOC_001972	XLOC_001972	B4GALT3	TSS2371	chr1:161141099-161147758	38.3408	28.7011	47.9805	37.0885	27.7993	46.3777	33.9581	25.5225	42.3938	43.239	32.3237	54.1543
XLOC_001973	XLOC_001973	ADAMTS4	TSS2372	chr1:161159537-161168845	0.0134532	0	0.0526917	0	0	0	0.00574349	0	0.0337444	0.00618527	0	0.0327966
XLOC_001974	XLOC_001974	APOA2	TSS2373	chr1:161192082-161193418	0	0	0	0	0	0	0.137119	0	0.489648	0	0	0
XLOC_001975	XLOC_001975	NR1I3	TSS2374	chr1:161195832-161208000	3.21277	0.313931	6.1116	3.50687	0.433691	6.58005	3.85535	0.559003	7.1517	4.14534	0.645055	7.64563
XLOC_001976	XLOC_001976	MPZ	TSS2375	chr1:161274524-161279762	0.0238235	0	0.0930917	0.223386	0.0363831	0.410388	0.0633592	0	0.154909	0.0876757	0	0.214859
XLOC_001977	XLOC_001977	C1orf192	TSS2376	chr1:161284165-161337673	3.25835	0	8.09878	2.28432	0	6.79624	2.54068	0	7.11111	3.20227	0	9.32702
XLOC_001978	XLOC_001978	FCGR3A	TSS2377,TSS2378	chr1:161511550-161520413	0	0	0	0	0	0	0	0	0	0	0	0
XLOC_001979	XLOC_001979	FCGR3B	TSS2379,TSS2380,TSS2381	chr1:161592987-161601753	0	0	0	0	0	0	0	0	0	0	0	0
XLOC_001980	XLOC_001980	RPL31P11	TSS2382	chr1:161653494-161655042	0.0150792	0	0.0787895	0	0	0	0	0	0	0	0	0
XLOC_001981	XLOC_001981	OLFML2B	TSS2383	chr1:161952981-161993644	0.0408683	0	0.111129	0.00734052	0	0.0416304	0.0138975	0	0.0617707	0.0243222	0	0.0739351
XLOC_001982	XLOC_001982	C1orf111	TSS2384	chr1:162343514-162346644	0	0	0	0.0504392	0	0.196946	0	0	0	0	0	0
XLOC_001983	XLOC_001983	SH2D1B	TSS2385	chr1:162365055-162381928	0.00944713	0	0.0527052	0	0	0	0.00931336	0	0.0530656	0	0	0
XLOC_001984	XLOC_001984	C1orf110	TSS2386	chr1:162824086-162838605	0.0173231	0	0.0920249	0	0	0	0.0336338	0	0.139656	0	0	0
XLOC_001985	XLOC_001985	RGS5	TSS2387,TSS2388	chr1:163112088-163291581	0.323832	0.0151001	0.632563	0.583153	0.0962502	1.07006	0.520792	0.0889797	0.952604	0.268972	0	0.5787
XLOC_001986	XLOC_001986	LOC100505795	TSS2389	chr1:164528596-164821060	0.0120063	0	0.219369	0	0	0	0	0	0	0	0	0
XLOC_001987	XLOC_001987	LMX1A	TSS2390,TSS2391	chr1:165171103-165325952	0	0	0	0	0	0	0.00548426	0	0.0461091	0	0	0
XLOC_001988	XLOC_001988	RXRG	TSS2392,TSS2393	chr1:165370158-165414592	0	0	0	0	0	0	0	0	0	0	0	0
XLOC_001989	XLOC_001989	LOC400794	TSS2394	chr1:165446078-165551341	0	0	0	0	0	0	0	0	0	0	0	0
XLOC_001990	XLOC_001990	ALDH9A1	TSS2395	chr1:165631448-165667900	25.1933	18.7661	31.6206	14.2485	10.3786	18.1183	26.571	19.8142	33.3279	25.6885	19.0961	32.2809
XLOC_001991	XLOC_001991	TMCO1	TSS2396	chr1:165693527-165738159	26.7394	20.3016	33.1773	28.2148	21.2731	35.1566	25.5024	19.3526	31.6522	17.8889	13.3964	22.3813
XLOC_001992	XLOC_001992	FAM78B	TSS2397	chr1:166039255-166135958	0	0	0	0.0354953	0	0.117692	0.0176706	0	0.101399	0.0231992	0	0.104845
XLOC_001993	XLOC_001993	MIR921	TSS2398	chr1:166039255-166135958	0	0	0	0	0	0	0	0	0	0	0	0
XLOC_001994	XLOC_001994	TADA1	TSS2399	chr1:166825748-166845654	7.1922	4.86146	9.52294	7.94686	5.42641	10.4673	6.58725	4.41334	8.76117	6.31258	4.20705	8.41811
XLOC_001995	XLOC_001995	ILDR2	TSS2400	chr1:166882440-166944561	0.0541164	0.00299781	0.105235	0.0308488	0	0.067706	0.0533064	0.00272239	0.10389	0.0240288	0	0.0553221
XLOC_001996	XLOC_001996	GPA33	TSS2401	chr1:167022081-167059868	0.0253002	0	0.0778296	0	0	0	0	0	0	0	0	0
XLOC_001997	XLOC_001997	CD247	TSS2402	chr1:167399876-167487847	0.279316	0.00476884	0.553864	0.079467	0	0.212865	0.151682	0	0.340331	0.11327	0	0.268751
XLOC_001998	XLOC_001998	CREG1	TSS2403	chr1:167510250-167523056	56.5055	42.4845	70.5265	68.7787	51.9396	85.6178	127.692	97.115	158.27	117.537	89.1241	145.95
XLOC_001999	XLOC_001999	ADCY10	TSS2404	chr1:167778624-167883453	0.00467676	0	0.0345129	0.0100846	0	0.0416488	0.00454035	0	0.0345675	0.0155719	0	0.0572858
XLOC_002000	XLOC_002000	MPC2	TSS2405,TSS2406	chr1:167885912-168045083	41.0974	28.1077	54.087	43.046	27.808	58.284	43.4548	29.1682	57.7415	46.1077	31.6229	60.5924
[truncated: 22,332 more rows]
