# Supplementary material for: Identification of PARP-7 substrates reveals a role for MARylation in microtubule control in ovarian cancer cells
Source: eLife. 2021 Jan 21;10:e60481. doi: 10.7554/eLife.60481 (PMC7884071; doi:10.7554/eLife.60481)
Supplement: Supplementary file 3. — Cytosolic extracts prepared from OVCAR4 and HeLa cells were incubated with purified asPARP-7 S563G and 8-Bu(3-yne)T-NAD+. The 8-Bu(3-yne)T-ADP-ribosylated proteins from the reactions were covalently linked to azido-agarose beads via copper-catalyzed cycloaddition. The conjugated azido-agarose beads were washed extensive and trypsinized to release peptides for protein identification by LC-MS/MS analysis. The ‘Column Heading’ key provides annotation information describing the metrics of each of the LC-MS/MS-identified peptides. The ‘Tab’ key provides details about all of the other worksheets contained within this spreadsheet. [file elife-60481-supp3.xlsx]

## Sheet: Legend and Contents
Supplemental Table S3. PARP-7 protein substrates from OVCAR4 and HeLa cells identified using an asPARP-7 approach with 8-Bu(3-yne)T-NAD+. Cytosolic extracts prepared from OVCAR4 and HeLa cells were incubated with purified asPARP-7 S563G and 8-Bu(3-yne)T-NAD+. The 8-Bu(3-yne)T-ADPribosylated proteins from the reactions were covalently linked to azido-agarose beads via copper-catalyzed cycloadditio…
Column Heading	Description
UniProt ID	UniProt Accession ID for LC-MS/MS peptide
Description	Descriptive name for the assigned protein
Sum PEP Score	This score is calculated on the basis of the posterior error probability (PEP) values of the (peptide spectrum matches) PSMs. The PEP is the probability that the observed PSM is incorrect
Coverage	The percentage of the protein sequence covered by identified peptides
# Peptides	The total number of distinct peptide sequences identified in the protein group
# PSMs	The number of peptide spectrum matches. The number of PSM's is the total number of identified peptide spectra matched for the protein.
# Unique Peptides	The number of peptide sequences that are unique to a protein group. These are the peptides that are common to the proteins of a protein group, and which do not occur in the proteins of any other group.
Tab	Contents
Legend and Contents	Heading Annotation Information Describing Metrics of Each the LC-MS/MS Identified Peptides and Summary of Information in this Table
OVCAR Trypsin Replicate 1	Peptides from On-bead Trypsinization of asPARP-1 catalyzed 8-Bu(3-yne)T-ADP-ribosylated Proteins from the 1st Replicate
OVCAR Trypsin Replicate 2	Peptides from On-bead Trypsinization of asPARP-1 catalyzed 8-Bu(3-yne)T-ADP-ribosylated Proteins from the 2nd replicate
HeLa Trypsin Replicate 1	Peptides from On-bead Trypsinization of asPARP-1 catalyzed 8-Bu(3-yne)T-ADP-ribosylated Proteins from the 1st Replicate
HeLa Trypsin Replicate 2	Peptides from On-bead Trypsinization of asPARP-1 catalyzed 8-Bu(3-yne)T-ADP-ribosylated Proteins from the 2nd replicate

## Sheet: OVCAR Trypsin Repl 1
Protein FDR Confidence	UniProt ID	Description	Sum PEP Score	Coverage	# Peptides	# PSMs	# Unique Peptides	# AAs	MW [kDa]	Score Sequest HT	# Peptides Sequest HT
High	H6VRG1	Keratin 1 OS=Homo sapiens GN=KRT1 PE=3 SV=1	127.769	64.4961	43	276	36	645	66.1	1028.71	43
High	P35908	Keratin, type II cytoskeletal 2 epidermal OS=Homo sapiens GN=KRT2 PE=1 SV=2	114.507	67.1362	35	189	27	639	65.4	704.05	35
High	P35527	Keratin, type I cytoskeletal 9 OS=Homo sapiens GN=KRT9 PE=1 SV=3	109.901	70.305	31	231	30	623	62	861.92	31
High	P13645	Keratin, type I cytoskeletal 10 OS=Homo sapiens GN=KRT10 PE=1 SV=6	103.413	50.3425	32	202	26	584	58.8	693.87	32
High	P68371	Tubulin beta-4B chain OS=Homo sapiens GN=TUBB4B PE=1 SV=1	101.781	71.4607	25	145	1	445	49.8	516.68	25
High	P07437	Tubulin beta chain OS=Homo sapiens GN=TUBB PE=1 SV=2	97.893	65.5405	24	144	3	444	49.6	515.7	24
High	P04350	Tubulin beta-4A chain OS=Homo sapiens GN=TUBB4A PE=1 SV=2	93.913	64.8649	23	131	2	444	49.6	459.97	23
High	P08779	Keratin, type I cytoskeletal 16 OS=Homo sapiens GN=KRT16 PE=1 SV=4	85.997	59.1966	30	173	18	473	51.2	602.69	30
High	Q13885	Tubulin beta-2A chain OS=Homo sapiens GN=TUBB2A PE=1 SV=1	82.539	62.4719	22	121	4	445	49.9	434.55	22
High	Q05BQ2	TIPARP protein (Fragment) OS=Homo sapiens GN=TIPARP PE=2 SV=1	82.487	30.1515	20	128	20	660	76.6	431.02	20
High	P13647	Keratin, type II cytoskeletal 5 OS=Homo sapiens GN=KRT5 PE=1 SV=3	81.231	46.1017	30	150	19	590	62.3	482.56	30
High	P02533	Keratin, type I cytoskeletal 14 OS=Homo sapiens GN=KRT14 PE=1 SV=4	81.21	53.6017	25	177	11	472	51.5	615.81	25
High	A0A0S2Z428	HCG2039812, isoform CRA_b (Fragment) OS=Homo sapiens GN=KRT6A PE=2 SV=1	71.399	44.8582	29	164	3	564	60	532.57	29
High	P04259	Keratin, type II cytoskeletal 6B OS=Homo sapiens GN=KRT6B PE=1 SV=5	71.043	44.8582	29	168	1	564	60	542.54	29
High	Q1ZYQ1	Tubulin alpha chain OS=Homo sapiens GN=TUBA2 PE=2 SV=1	62.238	49.5556	17	56	3	450	49.9	189.58	17
High	B2RBD5	Tubulin beta chain OS=Homo sapiens PE=2 SV=1	58.385	31.7778	15	108	0	450	50.4	380.31	15
High	Q86YZ3	Hornerin OS=Homo sapiens GN=HRNR PE=1 SV=2	58.081	27.9649	22	60	22	2850	282.2	237.66	22
High	A1A4E9	Keratin 13 OS=Homo sapiens GN=KRT13 PE=2 SV=1	57.642	52.1834	23	106	17	458	49.6	347.35	23
High	Q04695	Keratin, type I cytoskeletal 17 OS=Homo sapiens GN=KRT17 PE=1 SV=2	52.394	44.213	20	92	10	432	48.1	290.62	20
High	B4DKV4	cDNA FLJ60647, highly similar to Keratin, type II cytoskeletal 6B OS=Homo sapiens PE=2 SV=1	51.125	38.7833	20	107	1	526	55.7	338.1	20
High	F5H5D3	Tubulin alpha chain OS=Homo sapiens GN=TUBA1C PE=1 SV=1	49.687	41.2331	16	41	3	519	57.7	143.59	16
High	P68366	Tubulin alpha-4A chain OS=Homo sapiens GN=TUBA4A PE=1 SV=1	49.586	41.9643	13	33	2	448	49.9	119.87	13
High	P10809	60 kDa heat shock protein, mitochondrial OS=Homo sapiens GN=HSPD1 PE=1 SV=2	48.2	42.7574	17	32	17	573	61	124.06	17
High	O00622	Protein CYR61 OS=Homo sapiens GN=CYR61 PE=1 SV=1	44.872	57.7428	18	44	18	381	42	143.48	18
High	P63261	Actin, cytoplasmic 2 OS=Homo sapiens GN=ACTG1 PE=1 SV=1	38.686	49.0667	13	29	7	375	41.8	103.35	13
High	A7MD96	SYNPO protein (Fragment) OS=Homo sapiens GN=SYNPO PE=2 SV=1	37.462	29.7632	15	21	15	887	94.7	81.75	15
High	V9HW22	Epididymis luminal protein 33 OS=Homo sapiens GN=HEL-S-72p PE=2 SV=1	36.404	28.3282	15	34	10	646	70.9	120.84	15
High	P15924	Desmoplakin OS=Homo sapiens GN=DSP PE=1 SV=3	36.175	6.09544	14	37	14	2871	331.6	122.28	14
High	Q9BUF5	Tubulin beta-6 chain OS=Homo sapiens GN=TUBB6 PE=1 SV=1	34.777	23.3184	10	51	1	446	49.8	159.27	10
High	Q2NKY5	Tubulin beta chain OS=Homo sapiens GN=TUBB6 PE=2 SV=1	34.21	21.4765	10	57	0	447	50.1	182.27	10
High	P68104	Elongation factor 1-alpha 1 OS=Homo sapiens GN=EEF1A1 PE=1 SV=1	29.145	29.2208	10	33	10	462	50.1	109.39	10
High	P27635	60S ribosomal protein L10 OS=Homo sapiens GN=RPL10 PE=1 SV=4	26.333	36.9159	7	22	7	214	24.6	71.9	7
High	P62701	40S ribosomal protein S4, X isoform OS=Homo sapiens GN=RPS4X PE=1 SV=2	26.159	38.7833	10	25	10	263	29.6	88.07	10
High	V9HWB4	Epididymis secretory sperm binding protein Li 89n OS=Homo sapiens GN=HEL-S-89n PE=2 SV=1	25.498	23.8532	12	15	10	654	72.3	52.21	12
High	A8K872	cDNA FLJ77849, highly similar to Homo sapiens keratin, hair, basic, 6 (monilethrix) (KRTHB6), mRNA OS=Homo sapiens PE=2 SV=1	25.045	30.4527	11	28	11	486	53.4	90.34	11
High	Q02413	Desmoglein-1 OS=Homo sapiens GN=DSG1 PE=1 SV=2	24.463	9.05624	7	18	7	1049	113.7	68.56	7
High	Q15323	Keratin, type I cuticular Ha1 OS=Homo sapiens GN=KRT31 PE=1 SV=3	23.886	28.125	10	33	1	416	47.2	88.12	10
High	P23396	40S ribosomal protein S3 OS=Homo sapiens GN=RPS3 PE=1 SV=2	23.304	47.3251	9	17	9	243	26.7	63.09	9
High	A0A024R1X8	Junction plakoglobin, isoform CRA_a OS=Homo sapiens GN=JUP PE=4 SV=1	21.247	12.7517	8	17	8	745	81.7	56.16	8
High	A0A140TA69	Keratin, type I cuticular Ha4 OS=Homo sapiens GN=KRT34 PE=3 SV=1	21.071	20.8716	9	21	2	436	49.4	62.45	9
High	P12035	Keratin, type II cytoskeletal 3 OS=Homo sapiens GN=KRT3 PE=1 SV=3	20.789	14.3312	10	38	3	628	64.4	112.27	10
High	P38159	RNA-binding motif protein, X chromosome OS=Homo sapiens GN=RBMX PE=1 SV=3	20.444	28.3887	12	23	4	391	42.3	62.48	12
High	P04406	Glyceraldehyde-3-phosphate dehydrogenase OS=Homo sapiens GN=GAPDH PE=1 SV=3	19.823	32.5373	7	16	7	335	36	62.5	7
High	Q59F66	DEAD box polypeptide 17 isoform p82 variant (Fragment) OS=Homo sapiens PE=2 SV=1	19.793	13.7042	9	17	5	737	81	54.96	9
High	V9HW43	Epididymis secretory protein Li 102 OS=Homo sapiens GN=HEL-S-102 PE=2 SV=1	19.197	49.7561	8	10	8	205	22.8	41.65	8
High	B5BUE6	ATP-dependent RNA helicase DDX5 (Fragment) OS=Homo sapiens GN=DDX5 PE=2 SV=1	18.787	15.1466	8	13	4	614	69.1	44.44	8
High	G8JLB6	Heterogeneous nuclear ribonucleoprotein H OS=Homo sapiens GN=HNRNPH1 PE=1 SV=1	18.539	20.339	6	10	4	472	51.2	36	6
High	Q9BVJ6	U3 small nucleolar RNA-associated protein 14 homolog A OS=Homo sapiens GN=UTP14A PE=1 SV=1	18.452	15.9533	8	8	8	771	87.9	33.18	8
High	A0A024R1Q8	Ribosomal protein L23, isoform CRA_b OS=Homo sapiens GN=RPL23 PE=3 SV=1	17.33	61.4286	7	27	7	140	14.9	89.28	7
High	A8K3K1	cDNA FLJ78096, highly similar to Homo sapiens actin, alpha, cardiac muscle (ACTC), mRNA OS=Homo sapiens PE=2 SV=1	16.921	22.0159	7	18	1	377	42	54.55	7
High	O76009	Keratin, type I cuticular Ha3-I OS=Homo sapiens GN=KRT33A PE=2 SV=2	16.683	21.0396	8	14	1	404	45.9	41.06	8
High	Q8N1C8	HSPA9 protein (Fragment) OS=Homo sapiens GN=HSPA9 PE=2 SV=1	15.978	14.5374	7	14	7	681	73.8	52.63	7
High	Q96E39	RNA binding motif protein, X-linked-like-1 OS=Homo sapiens GN=RBMXL1 PE=1 SV=1	15.707	22.3077	9	19	1	390	42.1	50.24	9
High	A0A0A6YYL6	Protein RPL17-C18orf32 OS=Homo sapiens GN=RPL17-C18orf32 PE=3 SV=1	15.274	33.3333	7	7	7	228	26.4	26.15	7
High	P04075	Fructose-bisphosphate aldolase A OS=Homo sapiens GN=ALDOA PE=1 SV=2	15.083	21.1538	5	7	5	364	39.4	30.94	5
High	Q5EC54	Heterogeneous nuclear ribonucleoprotein K transcript variant OS=Homo sapiens GN=HNRPK PE=2 SV=1	14.841	19.3966	6	11	6	464	51	38.63	6
High	B2R6X5	cDNA, FLJ93166, highly similar to Homo sapiens heat shock 70kDa protein 6 (HSP70B') (HSPA6), mRNA OS=Homo sapiens PE=2 SV=1	14.655	10.2644	7	16	2	643	70.9	54.25	7
High	Q9UPN4	Centrosomal protein of 131 kDa OS=Homo sapiens GN=CEP131 PE=1 SV=3	14.445	7.6639	5	6	5	1083	122.1	25.77	5
High	P48047	ATP synthase subunit O, mitochondrial OS=Homo sapiens GN=ATP5O PE=1 SV=1	14.442	35.6808	6	13	6	213	23.3	45.99	6
High	Q8N1N4	Keratin, type II cytoskeletal 78 OS=Homo sapiens GN=KRT78 PE=2 SV=2	13.943	13.8462	7	11	6	520	56.8	33.85	7
High	A0A087X0X3	Heterogeneous nuclear ribonucleoprotein M OS=Homo sapiens GN=HNRNPM PE=1 SV=1	13.621	13.1507	7	8	7	730	77.5	31.18	7
High	Q99988	Growth/differentiation factor 15 OS=Homo sapiens GN=GDF15 PE=1 SV=3	13.616	27.9221	5	7	5	308	34.1	29.3	5
High	P09874	Poly [ADP-ribose] polymerase 1 OS=Homo sapiens GN=PARP1 PE=1 SV=4	13.312	8.08679	7	9	7	1014	113	28.42	7
High	B4DI54	cDNA FLJ56386, highly similar to Heat shock 70 kDa protein 1L OS=Homo sapiens PE=2 SV=1	13.154	9.50355	5	21	1	705	77.5	69.37	5
High	V9HW26	ATP synthase subunit alpha OS=Homo sapiens GN=HEL-S-123m PE=2 SV=1	12.948	11.2116	4	7	4	553	59.7	30.72	4
High	P05089	Arginase-1 OS=Homo sapiens GN=ARG1 PE=1 SV=2	12.522	16.4596	5	8	5	322	34.7	25.01	5
High	Q14257	Reticulocalbin-2 OS=Homo sapiens GN=RCN2 PE=1 SV=1	12.509	21.1356	4	4	4	317	36.9	16.8	4
High	V9HW88	Calreticulin, isoform CRA_b OS=Homo sapiens GN=HEL-S-99n PE=2 SV=1	12.37	21.3429	5	7	5	417	48.1	27.24	5
High	Q5D862	Filaggrin-2 OS=Homo sapiens GN=FLG2 PE=1 SV=1	12.248	4.89335	5	16	5	2391	247.9	58.35	5
High	Q59GY2	Ribosomal protein L4 variant (Fragment) OS=Homo sapiens PE=2 SV=1	11.878	15.6463	5	5	5	441	49	17.75	5
High	B4DPP6	cDNA FLJ54371, highly similar to Serum albumin OS=Homo sapiens PE=2 SV=1	11.867	6.95793	5	21	5	618	70.3	56.8	5
High	P62280	40S ribosomal protein S11 OS=Homo sapiens GN=RPS11 PE=1 SV=3	11.741	34.8101	6	25	6	158	18.4	64.43	6
High	P05787	Keratin, type II cytoskeletal 8 OS=Homo sapiens GN=KRT8 PE=1 SV=7	11.578	8.28157	6	25	1	483	53.7	76.41	6
High	Q59EJ3	Heat shock 70kDa protein 1A variant (Fragment) OS=Homo sapiens PE=2 SV=1	11.155	8.60367	5	14	1	709	77.4	45.83	5
High	P22626	Heterogeneous nuclear ribonucleoproteins A2/B1 OS=Homo sapiens GN=HNRNPA2B1 PE=1 SV=2	10.863	16.1473	4	4	4	353	37.4	16.51	4
High	P55795	Heterogeneous nuclear ribonucleoprotein H2 OS=Homo sapiens GN=HNRNPH2 PE=1 SV=1	10.698	12.0267	3	5	1	449	49.2	22.12	3
High	Q16630	Cleavage and polyadenylation specificity factor subunit 6 OS=Homo sapiens GN=CPSF6 PE=1 SV=2	10.674	7.98548	3	5	3	551	59.2	18.6	3
High	Q9Y305	Acyl-coenzyme A thioesterase 9, mitochondrial OS=Homo sapiens GN=ACOT9 PE=1 SV=2	10.489	13.8952	6	9	6	439	49.9	25.7	6
High	A0A024QZW7	Nucleoporin 153kDa, isoform CRA_a OS=Homo sapiens GN=NUP153 PE=4 SV=1	10.386	4.47458	4	5	4	1475	153.9	22.87	4
High	A0A0S2Z491	Nucleophosmin isoform 2 (Fragment) OS=Homo sapiens GN=NPM1 PE=2 SV=1	9.941	15.6463	3	5	3	294	32.6	18.84	3
High	Q6ZVX7	F-box only protein 50 OS=Homo sapiens GN=NCCRP1 PE=1 SV=1	9.781	19.2727	4	5	4	275	30.8	17.96	4
High	A0A024R8P8	Ribosomal protein L38, isoform CRA_a OS=Homo sapiens GN=RPL38 PE=3 SV=1	9.698	50	4	4	4	70	8.2	13.98	4
High	A0A024R0M6	Translocase of inner mitochondrial membrane 50 homolog (Yeast), isoform CRA_b OS=Homo sapiens GN=TIMM50 PE=4 SV=1	9.433	9.64912	3	3	3	456	50.4	13.41	3
High	Q13835	Plakophilin-1 OS=Homo sapiens GN=PKP1 PE=1 SV=2	9.364	6.0241	3	6	3	747	82.8	23.93	3
High	A0A024R5Z7	Annexin OS=Homo sapiens GN=ANXA2 PE=3 SV=1	9.173	11.2094	4	7	4	339	38.6	25.18	4
High	A0A024R6S1	DnaJ (Hsp40) homolog, subfamily A, member 2, isoform CRA_a OS=Homo sapiens GN=DNAJA2 PE=3 SV=1	9.151	13.3495	4	4	4	412	45.7	13.1	4
High	O43707	Alpha-actinin-4 OS=Homo sapiens GN=ACTN4 PE=1 SV=2	8.872	5.92755	4	7	4	911	104.8	26.13	4
High	A0A024R8S5	Protein disulfide-isomerase OS=Homo sapiens GN=P4HB PE=2 SV=1	8.864	8.26772	3	4	3	508	57.1	15.57	3
High	A0A024RAZ7	Heterogeneous nuclear ribonucleoprotein A1, isoform CRA_b OS=Homo sapiens GN=HNRPA1 PE=4 SV=1	8.853	14.7849	4	7	4	372	38.7	23.85	4
High	V9HW31	ATP synthase subunit beta OS=Homo sapiens GN=HEL-S-271 PE=1 SV=1	8.806	10.9641	4	7	4	529	56.5	27.29	4
High	P00558	Phosphoglycerate kinase 1 OS=Homo sapiens GN=PGK1 PE=1 SV=3	8.739	12.47	3	3	3	417	44.6	14.35	3
High	E9PAU2	Ribonucleoprotein PTB-binding 1 OS=Homo sapiens GN=RAVER1 PE=1 SV=1	8.461	8.06878	3	3	3	756	79.5	14.38	3
High	Q8TC04	Keratin 23 (Histone deacetylase inducible) OS=Homo sapiens GN=KRT23 PE=2 SV=1	8.134	7.58294	3	6	2	422	48.1	18.97	3
High	V9HWB8	Pyruvate kinase OS=Homo sapiens GN=HEL-S-30 PE=1 SV=1	8.039	10.5461	3	3	3	531	57.9	14.23	3
High	P21333	Filamin-A OS=Homo sapiens GN=FLNA PE=1 SV=4	7.995	2.75784	5	5	5	2647	280.6	19.59	5
High	P08729	Keratin, type II cytoskeletal 7 OS=Homo sapiens GN=KRT7 PE=1 SV=5	7.838	8.95522	4	11	2	469	51.4	29.77	4
High	B2R7W4	cDNA, FLJ93632, highly similar to Homo sapiens heterogeneous nuclear ribonucleoprotein R (HNRPR), mRNA OS=Homo sapiens PE=2 SV=1	7.836	6.95103	4	7	1	633	70.9	21.66	4
High	J3QQ67	60S ribosomal protein L18 (Fragment) OS=Homo sapiens GN=RPL18 PE=1 SV=1	7.748	19.4737	3	4	3	190	21.8	14.48	3
High	V9HWE9	Epididymis secretory protein Li 22 OS=Homo sapiens GN=HEL-S-22 PE=2 SV=1	7.571	30.4762	3	3	3	210	23.3	15.02	3
High	P62979	Ubiquitin-40S ribosomal protein S27a OS=Homo sapiens GN=RPS27A PE=1 SV=2	7.43	21.7949	3	7	3	156	18	25.99	3
High	B2R8Z8	cDNA, FLJ94136, highly similar to Homo sapiens synaptotagmin binding, cytoplasmic RNA interacting protein (SYNCRIP), mRNA OS=Homo sapiens PE=2 SV=1	7.246	7.70465	4	7	1	623	69.6	22.14	4
High	P62277	40S ribosomal protein S13 OS=Homo sapiens GN=RPS13 PE=1 SV=2	7.13	25.8278	4	10	4	151	17.2	30.98	4
High	Q6KB66	Keratin, type II cytoskeletal 80 OS=Homo sapiens GN=KRT80 PE=1 SV=2	7.049	7.74336	3	6	2	452	50.5	20.35	3
High	B3KQF5	cDNA FLJ90381 fis, clone NT2RP2005035, highly similar to Calumenin OS=Homo sapiens PE=2 SV=1	6.861	13.6508	2	2	2	315	37	9.95	2
High	Q6N092	Putative uncharacterized protein DKFZp686K18196 (Fragment) OS=Homo sapiens GN=DKFZp686K18196 PE=2 SV=1	6.774	5.20231	2	3	2	519	56.4	12.11	2
High	Q00839	Heterogeneous nuclear ribonucleoprotein U OS=Homo sapiens GN=HNRNPU PE=1 SV=6	6.687	5.09091	3	4	3	825	90.5	14.72	3
High	A0A0D9SF53	ATP-dependent RNA helicase DDX3X OS=Homo sapiens GN=DDX3X PE=1 SV=1	6.653	3.41064	2	3	1	733	81.4	10.66	2
High	Q5TDE9	Chromosome 1 open reading frame 57, isoform CRA_d OS=Homo sapiens GN=C1orf57 PE=2 SV=1	6.417	20	3	3	3	190	20.7	10.91	3
High	Q7L0Y3	Mitochondrial ribonuclease P protein 1 OS=Homo sapiens GN=TRMT10C PE=1 SV=2	6.353	10.1737	3	3	3	403	47.3	11	3
High	P49411	Elongation factor Tu, mitochondrial OS=Homo sapiens GN=TUFM PE=1 SV=2	6.231	7.07965	2	2	2	452	49.5	9.54	2
High	P15880	40S ribosomal protein S2 OS=Homo sapiens GN=RPS2 PE=1 SV=2	5.969	11.6041	3	4	3	293	31.3	13.04	3
High	F8W1S1	Keratin, type II cytoskeletal 74 OS=Homo sapiens GN=KRT74 PE=1 SV=1	5.968	5.3407	3	11	1	543	59.4	26.31	3
High	A8K486	Peptidyl-prolyl cis-trans isomerase OS=Homo sapiens PE=2 SV=1	5.933	21.8182	2	2	2	165	18	8.78	2
High	Q9Y446	Plakophilin-3 OS=Homo sapiens GN=PKP3 PE=1 SV=1	5.905	5.14429	3	3	3	797	87	10.22	3
High	B7Z268	Single-stranded DNA binding protein 1, isoform CRA_c OS=Homo sapiens GN=SSBP1 PE=2 SV=1	5.88	22.6415	3	6	3	159	18.5	21.21	3
High	Q4VXU2	Polyadenylate-binding protein 1-like OS=Homo sapiens GN=PABPC1L PE=2 SV=1	5.849	4.72313	2	2	1	614	68.3	8.72	2
High	P30101	Protein disulfide-isomerase A3 OS=Homo sapiens GN=PDIA3 PE=1 SV=4	5.739	11.8812	3	3	3	505	56.7	10.68	3
High	E9PK25	Cofilin-1 OS=Homo sapiens GN=CFL1 PE=1 SV=1	5.699	16.6667	2	2	2	204	22.7	9.43	2
High	B2R6F3	Splicing factor arginine/serine-rich 3 OS=Homo sapiens GN=SFRS3 PE=2 SV=1	5.657	12.8049	2	2	1	164	19.3	7.9	2
High	P83731	60S ribosomal protein L24 OS=Homo sapiens GN=RPL24 PE=1 SV=1	5.634	19.1083	3	3	3	157	17.8	9.4	3
High	Q53HB3	Proteasome 26S ATPase subunit 1 variant (Fragment) OS=Homo sapiens PE=1 SV=1	5.59	7.72727	2	2	2	440	49.2	8.56	2
High	Q5JR05	Rho-related GTP-binding protein RhoC OS=Homo sapiens GN=RHOC PE=4 SV=1	5.526	15.5779	2	2	2	199	22	7.82	2
High	P60174	Triosephosphate isomerase OS=Homo sapiens GN=TPI1 PE=1 SV=3	5.481	11.8881	2	2	2	286	30.8	10.03	2
High	P05362	Intercellular adhesion molecule 1 OS=Homo sapiens GN=ICAM1 PE=1 SV=2	5.307	4.51128	2	2	2	532	57.8	6.81	2
High	P09622	Dihydrolipoyl dehydrogenase, mitochondrial OS=Homo sapiens GN=DLD PE=1 SV=2	5.296	9.82318	2	3	2	509	54.1	14.11	2
High	A0A024R4K3	Malate dehydrogenase OS=Homo sapiens GN=MDH2 PE=2 SV=1	5.242	8.28402	2	2	2	338	35.5	6.85	2
High	P27824	Calnexin OS=Homo sapiens GN=CANX PE=1 SV=2	5.237	4.39189	2	2	2	592	67.5	7.89	2
High	A0A024R374	Cathepsin B, isoform CRA_a OS=Homo sapiens GN=CTSB PE=3 SV=1	5.21	10.3245	2	2	2	339	37.8	7.5	2
High	Q16629	Serine/arginine-rich splicing factor 7 OS=Homo sapiens GN=SRSF7 PE=1 SV=1	5.201	8.82353	2	2	1	238	27.4	7.84	2
High	P62263	40S ribosomal protein S14 OS=Homo sapiens GN=RPS14 PE=1 SV=3	5.002	15.894	2	7	2	151	16.3	22.73	2
High	A8K5Q1	cDNA FLJ77548, highly similar to Homo sapiens bin3, bicoid-interacting 3, homolog (Drosophila) (BCDIN3), mRNA OS=Homo sapiens PE=2 SV=1	5	5.07983	2	2	2	689	74.3	8.35	2
High	Q08188	Protein-glutamine gamma-glutamyltransferase E OS=Homo sapiens GN=TGM3 PE=1 SV=4	4.984	5.48341	2	2	2	693	76.6	8.54	2
High	P62913	60S ribosomal protein L11 OS=Homo sapiens GN=RPL11 PE=1 SV=2	4.97	12.9213	2	9	2	178	20.2	28.85	2
High	M0R0R2	40S ribosomal protein S5 OS=Homo sapiens GN=RPS5 PE=1 SV=1	4.947	9.77778	2	5	2	225	25.3	15.56	2
High	Q9NVI7	ATPase family AAA domain-containing protein 3A OS=Homo sapiens GN=ATAD3A PE=1 SV=2	4.936	5.99369	3	3	3	634	71.3	11.87	3
High	E9PB61	THO complex subunit 4 OS=Homo sapiens GN=ALYREF PE=1 SV=1	4.933	16.2879	2	2	2	264	27.5	7.86	2
High	Q6NVC0	SLC25A5 protein (Fragment) OS=Homo sapiens GN=SLC25A5 PE=2 SV=1	4.838	6.81115	2	2	2	323	35.3	5.82	2
High	O00257	E3 SUMO-protein ligase CBX4 OS=Homo sapiens GN=CBX4 PE=1 SV=3	4.815	7.85714	3	3	3	560	61.3	10.34	3
High	Q6IQ30	Polyadenylate-binding protein OS=Homo sapiens GN=PABPC4 PE=2 SV=1	4.811	4.84848	2	4	1	660	72.3	15.64	2
High	P46781	40S ribosomal protein S9 OS=Homo sapiens GN=RPS9 PE=1 SV=3	4.806	10.8247	3	3	3	194	22.6	8.94	3
High	A0A0C4DG17	40S ribosomal protein SA OS=Homo sapiens GN=RPSA PE=1 SV=1	4.748	9	2	2	2	300	33.3	7.44	2
High	P62269	40S ribosomal protein S18 OS=Homo sapiens GN=RPS18 PE=1 SV=3	4.736	19.0789	3	4	2	152	17.7	11.28	3
High	B2R4M6	Protein S100 OS=Homo sapiens PE=2 SV=1	4.667	24.5614	2	3	2	114	13.2	10.18	2
High	B2R4R0	Histone H4 OS=Homo sapiens GN=HIST1H4J PE=2 SV=1	4.613	22.3301	2	6	2	103	11.4	21.55	2
High	P12268	Inosine-5'-monophosphate dehydrogenase 2 OS=Homo sapiens GN=IMPDH2 PE=1 SV=2	4.581	5.83658	2	2	2	514	55.8	7.99	2
High	Q14498	RNA-binding protein 39 OS=Homo sapiens GN=RBM39 PE=1 SV=2	4.572	6.03774	2	3	2	530	59.3	9.64	2
High	Q13344	Fus-like protein (Fragment) OS=Homo sapiens PE=2 SV=1	4.53	3.2197	2	2	2	528	53.3	7.91	2
High	P47929	Galectin-7 OS=Homo sapiens GN=LGALS7 PE=1 SV=2	4.499	18.3824	2	5	2	136	15.1	16.25	2
High	B4E1N4	cDNA FLJ61695, highly similar to Glioma tumor suppressor candidate region gene 2 protein OS=Homo sapiens PE=2 SV=1	4.463	4.88599	2	2	2	614	70	7.36	2
High	Q99456	Keratin, type I cytoskeletal 12 OS=Homo sapiens GN=KRT12 PE=1 SV=1	4.401	3.64372	3	8	1	494	53.5	21.29	3
High	P23246	Splicing factor, proline- and glutamine-rich OS=Homo sapiens GN=SFPQ PE=1 SV=2	4.331	4.52617	2	3	2	707	76.1	13.23	2
High	A0A0G2JQH2	40S ribosomal protein S18 OS=Homo sapiens GN=RPS18 PE=1 SV=1	4.323	66.6667	2	2	1	33	3.8	6.93	2
High	Q9HC52	Chromobox protein homolog 8 OS=Homo sapiens GN=CBX8 PE=1 SV=3	4.31	7.19794	2	2	2	389	43.4	6.93	2
High	Q96AG4	Leucine-rich repeat-containing protein 59 OS=Homo sapiens GN=LRRC59 PE=1 SV=1	4.309	9.12052	2	2	2	307	34.9	8.65	2
High	A0A024R7T3	Heterogeneous nuclear ribonucleoprotein F, isoform CRA_a OS=Homo sapiens GN=HNRPF PE=4 SV=1	4.223	9.63855	3	4	3	415	45.6	13.16	3
High	Q4LE64	NUMA1 variant protein (Fragment) OS=Homo sapiens GN=NUMA1 variant protein PE=2 SV=1	4.21	1.03725	2	2	2	2121	238.7	7.04	2
High	P84098	60S ribosomal protein L19 OS=Homo sapiens GN=RPL19 PE=1 SV=1	4.19	8.67347	1	2	1	196	23.5	8.46	1
High	P25311	Zinc-alpha-2-glycoprotein OS=Homo sapiens GN=AZGP1 PE=1 SV=2	4.151	7.38255	2	3	2	298	34.2	9.4	2
High	B4DJQ5	cDNA FLJ59211, highly similar to Glucosidase 2 subunit beta OS=Homo sapiens PE=2 SV=1	4.13	4.48598	2	3	2	535	60.1	10.06	2
High	Q15717	ELAV-like protein 1 OS=Homo sapiens GN=ELAVL1 PE=1 SV=2	4.083	7.66871	2	2	2	326	36.1	7.59	2
High	O43823	A-kinase anchor protein 8 OS=Homo sapiens GN=AKAP8 PE=1 SV=1	3.991	4.62428	2	2	2	692	76.1	6.45	2
High	B4DX78	cDNA FLJ55484, highly similar to ATP-dependent RNA helicase DDX39 (EC 3.6.1.-) OS=Homo sapiens PE=2 SV=1	3.98	8.93617	2	2	2	470	53.7	7.12	2
High	Q9NX20	39S ribosomal protein L16, mitochondrial OS=Homo sapiens GN=MRPL16 PE=1 SV=1	3.926	6.3745	1	1	1	251	28.4	5.04	1
High	A0A0A0MQS1	Pyrroline-5-carboxylate reductase OS=Homo sapiens GN=PYCRL PE=1 SV=1	3.864	7.69231	2	8	2	286	29.9	25.62	2
High	P13674	Prolyl 4-hydroxylase subunit alpha-1 OS=Homo sapiens GN=P4HA1 PE=1 SV=2	3.847	5.24345	2	2	2	534	61	6.05	2
High	A0A024R9Y6	Guanine nucleotide binding protein-like 3 (Nucleolar)-like, isoform CRA_a OS=Homo sapiens GN=GNL3L PE=4 SV=1	3.843	5.49828	2	2	2	582	65.5	9.4	2
High	A0A158RFU6	RAB7, member RAS oncogene family, isoform CRA_a OS=Homo sapiens GN=RAB7A PE=2 SV=1	3.768	6.76329	1	1	1	207	23.5	4.75	1
High	A0A024RBB7	Nucleosome assembly protein 1-like 1, isoform CRA_a OS=Homo sapiens GN=NAP1L1 PE=3 SV=1	3.76	4.34783	1	1	1	391	45.3	4.48	1
High	P58107	Epiplakin OS=Homo sapiens GN=EPPK1 PE=1 SV=2	3.746	3.10413	2	2	2	5090	555.3	7.89	2
High	B5BU38	Annexin OS=Homo sapiens GN=ANXA1 PE=2 SV=1	3.71	4.04624	1	1	1	346	38.7	4.79	1
High	Q8WVV4	Protein POF1B OS=Homo sapiens GN=POF1B PE=1 SV=3	3.67	2.71647	1	1	1	589	68	4.73	1
High	E5KSX8	Mitochondrial transcription factor A OS=Homo sapiens PE=4 SV=1	3.655	8.94309	2	4	2	246	29.1	12.29	2
High	B4E0L0	cDNA FLJ54030, highly similar to Polymerase delta-interacting protein 3 OS=Homo sapiens PE=2 SV=1	3.616	8.21918	2	2	2	438	48.1	8	2
High	Q9BTD8	RNA-binding protein 42 OS=Homo sapiens GN=RBM42 PE=1 SV=1	3.596	3.54167	1	1	1	480	50.4	4.78	1
High	E7D7X9	Pyrroline-5-carboxylate reductase OS=Homo sapiens PE=2 SV=1	3.579	11.2853	2	2	2	319	33.4	7.08	2
High	P61626	Lysozyme C OS=Homo sapiens GN=LYZ PE=1 SV=1	3.572	14.1892	2	2	2	148	16.5	6.6	2
High	O75152	Zinc finger CCCH domain-containing protein 11A OS=Homo sapiens GN=ZC3H11A PE=1 SV=3	3.57	2.96296	2	2	2	810	89.1	6.11	2
High	Q6IPX4	40S ribosomal protein S16 OS=Homo sapiens GN=RPS16 PE=1 SV=1	3.562	13.1579	2	2	2	152	17.1	6.36	2
High	A4D1G5	40S ribosomal protein S27 OS=Homo sapiens GN=LOC392748 PE=3 SV=1	3.558	14.1892	2	2	2	148	16.9	5.77	2
High	P09382	Galectin-1 OS=Homo sapiens GN=LGALS1 PE=1 SV=2	3.492	11.8519	1	1	1	135	14.7	4.8	1
High	Q53G26	DnaJ (Hsp40) homolog, subfamily A, member 3 variant (Fragment) OS=Homo sapiens GN=DNAJA3 PE=1 SV=1	3.478	3.95833	2	2	2	480	52.5	5.59	2
High	A0A0U4BW16	Non-muscle myosin heavy chain 9 OS=Homo sapiens GN=MYH9 PE=2 SV=1	3.473	0.866021	1	1	1	1963	226.4	4.85	1
High	B2R4C0	60S ribosomal protein L18a OS=Homo sapiens PE=2 SV=1	3.447	11.3636	2	4	2	176	20.7	13.87	2
High	O75947	ATP synthase subunit d, mitochondrial OS=Homo sapiens GN=ATP5H PE=1 SV=3	3.364	10.559	1	1	1	161	18.5	3.89	1
High	Q53F64	Heterogeneous nuclear ribonucleoprotein AB isoform a variant (Fragment) OS=Homo sapiens PE=2 SV=1	3.339	6.92771	2	5	2	332	36	15.46	2
High	A0A024RBE7	Thymopoietin, isoform CRA_c OS=Homo sapiens GN=TMPO PE=4 SV=1	3.312	3.52423	1	1	1	454	50.6	4.61	1
High	P30040	Endoplasmic reticulum resident protein 29 OS=Homo sapiens GN=ERP29 PE=1 SV=4	3.308	8.42912	2	2	2	261	29	5.87	2
High	P07195	L-lactate dehydrogenase B chain OS=Homo sapiens GN=LDHB PE=1 SV=2	3.307	5.98802	2	3	1	334	36.6	7.45	2
High	P12273	Prolactin-inducible protein OS=Homo sapiens GN=PIP PE=1 SV=1	3.269	13.6986	2	2	2	146	16.6	5.67	2
High	A8K228	cDNA FLJ77874, highly similar to Homo sapiens glycine C-acetyltransferase (2-amino-3-ketobutyrate coenzyme A ligase), mRNA OS=Homo sapiens PE=2 SV=1	3.251	4.05728	1	1	1	419	45.2	5.5	1
High	O00483	Cytochrome c oxidase subunit NDUFA4 OS=Homo sapiens GN=NDUFA4 PE=1 SV=1	3.226	14.8148	1	1	1	81	9.4	3.65	1
High	P01040	Cystatin-A OS=Homo sapiens GN=CSTA PE=1 SV=1	3.113	18.3673	1	1	1	98	11	4.05	1
High	Q6DHW4	Uncharacterized protein OS=Homo sapiens PE=2 SV=1	3.096	6.32911	1	1	1	237	25.1	4.94	1
High	P41250	Glycine--tRNA ligase OS=Homo sapiens GN=GARS PE=1 SV=3	3.092	1.75913	1	1	1	739	83.1	4.39	1
High	Q53Z07	NPC-A-16 OS=Homo sapiens GN=RPL9 PE=2 SV=1	3.053	7.29167	1	1	1	192	21.9	4.57	1
High	Q96D15	Reticulocalbin-3 OS=Homo sapiens GN=RCN3 PE=1 SV=1	3.033	4.26829	1	1	1	328	37.5	4.82	1
High	Q8N684	Cleavage and polyadenylation specificity factor subunit 7 OS=Homo sapiens GN=CPSF7 PE=1 SV=1	3.004	4.03397	2	2	2	471	52	5.63	2
High	Q9Y4L1	Hypoxia up-regulated protein 1 OS=Homo sapiens GN=HYOU1 PE=1 SV=1	2.999	2.1021	1	1	1	999	111.3	5.6	1
High	P29508	Serpin B3 OS=Homo sapiens GN=SERPINB3 PE=1 SV=2	2.991	3.07692	1	2	1	390	44.5	7.23	1
High	O95831	Apoptosis-inducing factor 1, mitochondrial OS=Homo sapiens GN=AIFM1 PE=1 SV=1	2.966	2.12072	1	1	1	613	66.9	3.86	1
High	P62851	40S ribosomal protein S25 OS=Homo sapiens GN=RPS25 PE=1 SV=1	2.953	15.2	2	3	2	125	13.7	8.95	2
High	P00338	L-lactate dehydrogenase A chain OS=Homo sapiens GN=LDHA PE=1 SV=2	2.922	6.0241	2	3	1	332	36.7	7.1	2
High	A0A024R321	Filamin B, beta (Actin binding protein 278), isoform CRA_a OS=Homo sapiens GN=FLNB PE=4 SV=1	2.856	0.533944	1	1	1	2622	280.3	4.83	1
High	A8K690	cDNA FLJ76863, highly similar to Homo sapiens stress-induced-phosphoprotein 1 (Hsp70/Hsp90-organizing protein) (STIP1), mRNA OS=Homo sapiens PE=2 SV=1	2.833	2.39411	1	1	1	543	62.6	4.65	1
High	Q13151	Heterogeneous nuclear ribonucleoprotein A0 OS=Homo sapiens GN=HNRNPA0 PE=1 SV=1	2.825	5.2459	1	1	1	305	30.8	4.61	1
High	P36542	ATP synthase subunit gamma, mitochondrial OS=Homo sapiens GN=ATP5C1 PE=1 SV=1	2.817	4.02685	1	1	1	298	33	3.74	1
High	P99999	Cytochrome c OS=Homo sapiens GN=CYCS PE=1 SV=2	2.771	14.2857	2	2	2	105	11.7	4.74	2
High	H3BN98	Uncharacterized protein (Fragment) OS=Homo sapiens PE=4 SV=2	2.706	6.75105	2	3	2	237	27.2	7.71	2
High	P62854	40S ribosomal protein S26 OS=Homo sapiens GN=RPS26 PE=1 SV=3	2.688	10.4348	1	1	1	115	13	3.48	1
High	P11177	Pyruvate dehydrogenase E1 component subunit beta, mitochondrial OS=Homo sapiens GN=PDHB PE=1 SV=3	2.673	4.45682	1	1	1	359	39.2	4.55	1
High	A0A0S2Z410	Hydroxysteroid dehydrogenase 10 isoform 1 (Fragment) OS=Homo sapiens GN=HSD17B10 PE=2 SV=1	2.629	8.81226	1	1	1	261	26.9	5.57	1
High	P05387	60S acidic ribosomal protein P2 OS=Homo sapiens GN=RPLP2 PE=1 SV=1	2.623	10.4348	1	1	1	115	11.7	3.8	1
High	Q8WUD1	Ras-related protein Rab-2B OS=Homo sapiens GN=RAB2B PE=1 SV=1	2.608	6.01852	1	1	1	216	24.2	4.55	1
High	Q13242	Serine/arginine-rich splicing factor 9 OS=Homo sapiens GN=SRSF9 PE=1 SV=1	2.591	9.04977	2	3	2	221	25.5	8.37	2
High	Q53RT3	Retroviral-like aspartic protease 1 OS=Homo sapiens GN=ASPRV1 PE=1 SV=1	2.581	3.79009	1	1	1	343	37	3.58	1
High	P17987	T-complex protein 1 subunit alpha OS=Homo sapiens GN=TCP1 PE=1 SV=1	2.563	1.97842	1	1	1	556	60.3	3.8	1
High	P46776	60S ribosomal protein L27a OS=Homo sapiens GN=RPL27A PE=1 SV=2	2.554	7.43243	1	4	1	148	16.6	13.3	1
High	J3KTL2	Serine/arginine-rich-splicing factor 1 OS=Homo sapiens GN=SRSF1 PE=1 SV=1	2.552	4.74308	1	2	1	253	28.3	7.13	1
High	P62888	60S ribosomal protein L30 OS=Homo sapiens GN=RPL30 PE=1 SV=2	2.551	13.913	1	1	1	115	12.8	4.36	1
High	P78328	HP47 protein (Fragment) OS=Homo sapiens PE=2 SV=1	2.55	17.9487	1	1	1	78	8.7	3.66	1
High	Q8TCD0	Uncharacterized protein OS=Homo sapiens PE=1 SV=1	2.509	5.43933	1	3	1	239	26.2	10.21	1
High	P46013	Proliferation marker protein Ki-67 OS=Homo sapiens GN=MKI67 PE=1 SV=2	2.492	1.13636	1	1	1	3256	358.5	5.66	1
High	P19338	Nucleolin OS=Homo sapiens GN=NCL PE=1 SV=3	2.491	1.97183	1	1	1	710	76.6	4.62	1
High	B4DWA7	Serine hydroxymethyltransferase OS=Homo sapiens PE=2 SV=1	2.483	2.72904	1	1	1	513	56.3	3.69	1
High	P19525	Interferon-induced, double-stranded RNA-activated protein kinase OS=Homo sapiens GN=EIF2AK2 PE=1 SV=2	2.459	1.99637	1	1	1	551	62.1	4.18	1
High	B3KMQ6	cDNA FLJ12172 fis, clone MAMMA1000684, highly similar to Opioid growth factor receptor OS=Homo sapiens PE=2 SV=1	2.449	2.36337	1	1	1	677	73.3	3.86	1
High	J3QLS3	28S ribosomal protein S7, mitochondrial OS=Homo sapiens GN=MRPS7 PE=1 SV=1	2.431	8.48708	2	2	2	271	31.7	6.78	2
High	A1L020	RNA-binding protein MEX3A OS=Homo sapiens GN=MEX3A PE=1 SV=1	2.399	3.46154	1	1	1	520	54.1	5.28	1
High	A0A024QZK8	Heterogeneous nuclear ribonucleoprotein H3 (2H9), isoform CRA_a OS=Homo sapiens GN=HNRPH3 PE=4 SV=1	2.369	4.04624	1	2	1	346	36.9	7.14	1
High	Q6IPH7	RPL14 protein OS=Homo sapiens GN=RPL14 PE=1 SV=1	2.358	5.45455	1	1	1	220	23.8	3.34	1
High	P25685	DnaJ homolog subfamily B member 1 OS=Homo sapiens GN=DNAJB1 PE=1 SV=4	2.351	7.64706	2	2	2	340	38	6.89	2
High	B7Z809	cDNA FLJ56016, highly similar to C-1-tetrahydrofolate synthase, cytoplasmic OS=Homo sapiens PE=2 SV=1	2.342	1.47059	1	1	1	1020	110.4	4.05	1
High	B3KTJ9	cDNA FLJ38393 fis, clone FEBRA2007212 OS=Homo sapiens PE=2 SV=1	2.314	3.25027	1	1	1	923	102.9	5.46	1
High	Q08554	Desmocollin-1 OS=Homo sapiens GN=DSC1 PE=1 SV=2	2.311	1.67785	1	1	1	894	99.9	3.15	1
High	B2R9U2	Peptidylprolyl isomerase OS=Homo sapiens PE=2 SV=1	2.308	3.7037	1	1	1	459	51.8	3.54	1
High	Q9Y5L4	Mitochondrial import inner membrane translocase subunit Tim13 OS=Homo sapiens GN=TIMM13 PE=1 SV=1	2.303	11.5789	1	1	1	95	10.5	3.73	1
High	Q14240	Eukaryotic initiation factor 4A-II OS=Homo sapiens GN=EIF4A2 PE=1 SV=2	2.284	2.457	1	1	1	407	46.4	3.62	1
High	Q9NQ39	Putative 40S ribosomal protein S10-like OS=Homo sapiens GN=RPS10P5 PE=5 SV=1	2.275	7.95455	1	3	1	176	20.1	10	1
High	P04040	Catalase OS=Homo sapiens GN=CAT PE=1 SV=3	2.253	2.08729	1	1	1	527	59.7	3.23	1
High	P02545	Prelamin-A/C OS=Homo sapiens GN=LMNA PE=1 SV=1	2.22	2.25904	1	1	1	664	74.1	5.11	1
High	E7EX29	14-3-3 protein zeta/delta (Fragment) OS=Homo sapiens GN=YWHAZ PE=1 SV=1	2.204	5.69106	1	3	1	246	28	10.1	1
High	A0A1B0GU03	Uncharacterized protein OS=Homo sapiens PE=1 SV=1	2.184	1.89003	1	1	1	582	62.7	3.38	1
High	P81605	Dermcidin OS=Homo sapiens GN=DCD PE=1 SV=2	2.161	10	1	3	1	110	11.3	9.81	1
High	P25789	Proteasome subunit alpha type-4 OS=Homo sapiens GN=PSMA4 PE=1 SV=1	2.145	3.83142	1	1	1	261	29.5	3.31	1
High	Q13435	Splicing factor 3B subunit 2 OS=Homo sapiens GN=SF3B2 PE=1 SV=2	2.125	1.56425	1	1	1	895	100.2	3.15	1
High	O60716	Catenin delta-1 OS=Homo sapiens GN=CTNND1 PE=1 SV=1	2.121	1.34298	1	1	1	968	108.1	3.56	1
High	B4E1U9	cDNA FLJ54776, highly similar to Cell division control protein 42 homolog OS=Homo sapiens PE=2 SV=1	2.093	8.89831	1	1	1	236	26.5	4.57	1
High	Q8NBS9	Thioredoxin domain-containing protein 5 OS=Homo sapiens GN=TXNDC5 PE=1 SV=2	2.091	4.62963	1	1	1	432	47.6	4.53	1
High	Q59GK9	Ribosomal protein L21 variant (Fragment) OS=Homo sapiens PE=2 SV=1	2.087	9.20245	1	1	1	163	18.9	4.56	1
High	A8MXP9	Matrin-3 OS=Homo sapiens GN=MATR3 PE=1 SV=1	2.069	1.45251	1	1	1	895	99.9	3.7	1
High	Q9HBB3	60S ribosomal protein L6 OS=Homo sapiens PE=2 SV=1	2.067	4.49827	1	1	1	289	32.9	3.79	1
High	B2R739	cDNA, FLJ93269, highly similar to Homo sapiens mitochondrial ribosomal protein L15 (MRPL15), nuclear gene encoding mitochondrial protein, mRNA OS=Homo sapiens PE=2 SV=1	2.02	4.72973	1	1	1	296	33.4	2.94	1
High	P51991	Heterogeneous nuclear ribonucleoprotein A3 OS=Homo sapiens GN=HNRNPA3 PE=1 SV=2	2.018	5.82011	1	2	1	378	39.6	6.8	1
High	A2A3N6	Putative PIP5K1A and PSMD4-like protein OS=Homo sapiens GN=PIPSL PE=5 SV=1	1.999	1.16009	1	1	1	862	95	3.09	1
High	A0A0U1RRH7	Histone H2A OS=Homo sapiens PE=3 SV=1	1.999	5.29412	1	4	1	170	18.5	13.09	1
High	P61604	10 kDa heat shock protein, mitochondrial OS=Homo sapiens GN=HSPE1 PE=1 SV=2	1.977	11.7647	1	1	1	102	10.9	3.43	1
High	Q7Z351	Putative uncharacterized protein DKFZp686N02209 OS=Homo sapiens GN=DKFZp686N02209 PE=2 SV=1	1.96	3.52697	1	1	1	482	52.8	3.4	1
High	J3KPS0	DnaJ (Hsp40) homolog, subfamily B, member 12, isoform CRA_c OS=Homo sapiens GN=DNAJB12 PE=1 SV=1	1.945	2.20049	1	1	1	409	45.5	2.88	1
High	B0YIW6	Archain 1, isoform CRA_a OS=Homo sapiens GN=ARCN1 PE=1 SV=1	1.939	1.81159	1	1	1	552	61.6	2.78	1
High	P26373	60S ribosomal protein L13 OS=Homo sapiens GN=RPL13 PE=1 SV=4	1.936	6.16114	1	5	1	211	24.2	20.06	1
High	P20930	Filaggrin OS=Homo sapiens GN=FLG PE=1 SV=3	1.928	0.270869	1	1	1	4061	434.9	2.44	1
High	P39023	60S ribosomal protein L3 OS=Homo sapiens GN=RPL3 PE=1 SV=2	1.927	2.23325	1	1	1	403	46.1	3.33	1
High	B7Z4C8	60S ribosomal protein L31 OS=Homo sapiens GN=RPL31 PE=1 SV=1	1.923	6.92308	1	5	1	130	15.1	15	1
High	Q08945	FACT complex subunit SSRP1 OS=Homo sapiens GN=SSRP1 PE=1 SV=1	1.918	2.11566	1	1	1	709	81	4.08	1
High	B4DUT8	Calponin OS=Homo sapiens GN=CNN2 PE=1 SV=1	1.907	3.33333	1	1	1	330	35.9	3.62	1
High	D3DSQ1	N-acylsphingosine amidohydrolase (Acid ceramidase) 1, isoform CRA_c OS=Homo sapiens GN=ASAH1 PE=4 SV=1	1.896	4.21245	1	1	1	546	60.6	4.66	1
High	Q8TAE8	Growth arrest and DNA damage-inducible proteins-interacting protein 1 OS=Homo sapiens GN=GADD45GIP1 PE=1 SV=1	1.891	4.5045	1	1	1	222	25.4	2.68	1
High	Q8NDT2	Putative RNA-binding protein 15B OS=Homo sapiens GN=RBM15B PE=1 SV=3	1.89	1.1236	1	1	1	890	97.1	3.01	1
High	Q3KQU3	MAP7 domain-containing protein 1 OS=Homo sapiens GN=MAP7D1 PE=1 SV=1	1.886	1.42687	1	1	1	841	92.8	3.3	1
High	V9HWC7	Epididymis secretory sperm binding protein Li 128m OS=Homo sapiens GN=HEL-S-128m PE=2 SV=1	1.878	4.01786	1	1	1	224	25	2.87	1
High	P46459	Vesicle-fusing ATPase OS=Homo sapiens GN=NSF PE=1 SV=3	1.878	1.34409	1	1	1	744	82.5	3.62	1
High	Q6UWP8	Suprabasin OS=Homo sapiens GN=SBSN PE=1 SV=2	1.864	3.05085	1	1	1	590	60.5	4.21	1
High	A8K9U0	cDNA FLJ78260, highly similar to Homo sapiens RNA binding motif protein 4, mRNA OS=Homo sapiens PE=2 SV=1	1.863	4.3956	1	1	1	364	40.3	3.57	1
High	P13010	X-ray repair cross-complementing protein 5 OS=Homo sapiens GN=XRCC5 PE=1 SV=3	1.857	3.27869	1	1	1	732	82.7	4.52	1
High	Q92615	La-related protein 4B OS=Homo sapiens GN=LARP4B PE=1 SV=3	1.85	1.35501	1	1	1	738	80.5	3.19	1
High	E9PRY8	Elongation factor 1-delta OS=Homo sapiens GN=EEF1D PE=1 SV=1	1.849	1.72166	1	1	1	697	76.5	3.88	1
High	P07900	Heat shock protein HSP 90-alpha OS=Homo sapiens GN=HSP90AA1 PE=1 SV=5	1.844	1.22951	1	1	1	732	84.6	3.21	1
High	A0A140VK41	Testicular secretory protein Li 41 OS=Homo sapiens PE=2 SV=1	1.834	3.73832	1	1	1	321	35	4.01	1
High	A8K6A2	cDNA FLJ77317, highly similar to Homo sapiens retinoblastoma binding protein 7 (RBBP7), mRNA OS=Homo sapiens PE=2 SV=1	1.812	1.88235	1	1	1	425	47.8	2.58	1
High	Q3KP66	Uncharacterized protein C1orf106 OS=Homo sapiens GN=C1orf106 PE=2 SV=2	1.807	2.26244	1	1	1	663	72.9	3.66	1
High	Q53HU8	Vimentin variant (Fragment) OS=Homo sapiens PE=2 SV=1	1.805	2.14592	1	1	1	466	53.7	3.09	1
High	I6TRR8	SND1-BRAF fusion OS=Homo sapiens PE=2 SV=1	1.805	0.81716	1	1	1	979	109.1	2.66	1
High	P31025	Lipocalin-1 OS=Homo sapiens GN=LCN1 PE=1 SV=1	1.791	6.25	1	1	1	176	19.2	3.49	1
High	A2A3R6	40S ribosomal protein S6 OS=Homo sapiens GN=RPS6 PE=2 SV=1	1.788	4.81928	1	1	1	249	28.7	3.33	1
High	A0A140VKA6	Testis secretory sperm-binding protein Li 233m OS=Homo sapiens PE=2 SV=1	1.777	2.71003	1	1	1	369	41.3	2.89	1
High	A0A024QZW2	Nucleolar protein 7, 27kDa, isoform CRA_a OS=Homo sapiens GN=NOL7 PE=4 SV=1	1.765	5.44747	1	1	1	257	29.4	4.55	1
High	Q15293	Reticulocalbin-1 OS=Homo sapiens GN=RCN1 PE=1 SV=1	1.761	3.62538	1	2	1	331	38.9	6.05	1
High	Q15637	Splicing factor 1 OS=Homo sapiens GN=SF1 PE=1 SV=4	1.75	2.03443	1	1	1	639	68.3	3.74	1
High	A0A090N7Y2	ATP-binding cassette, sub-family F (GCN20), member 2 OS=Homo sapiens GN=ABCF2 PE=4 SV=1	1.736	1.73502	1	1	1	634	72.4	3.09	1
High	A0A140VK70	Testis secretory sperm-binding protein Li 197a OS=Homo sapiens PE=2 SV=1	1.733	3.00231	1	1	1	433	48.6	3.6	1
High	A8K517	Ribosomal protein S23, isoform CRA_a OS=Homo sapiens GN=RPS23 PE=2 SV=1	1.705	7.69231	1	1	1	143	15.8	2.77	1
High	Q6ZS82	Regulator of G-protein signaling 9-binding protein OS=Homo sapiens GN=RGS9BP PE=2 SV=1	1.703	10.2128	1	1	1	235	25.1	3.21	1
High	A0A024R814	Ribosomal protein L7, isoform CRA_a OS=Homo sapiens GN=RPL7 PE=4 SV=1	1.694	4.2471	1	1	1	259	30.4	3.68	1
High	O75400	Pre-mRNA-processing factor 40 homolog A OS=Homo sapiens GN=PRPF40A PE=1 SV=2	1.688	2.08986	1	1	1	957	108.7	4.19	1
High	A2RRH1	Amine oxidase OS=Homo sapiens GN=IL4I1 PE=2 SV=1	1.685	2.54669	1	1	1	589	65.3	4.43	1
High	Q6PKG0	La-related protein 1 OS=Homo sapiens GN=LARP1 PE=1 SV=2	1.683	0.729927	1	1	1	1096	123.4	2.36	1
High	O75494	Serine/arginine-rich splicing factor 10 OS=Homo sapiens GN=SRSF10 PE=1 SV=1	1.668	4.58015	1	1	1	262	31.3	2.94	1
High	P51970	NADH dehydrogenase [ubiquinone] 1 alpha subcomplex subunit 8 OS=Homo sapiens GN=NDUFA8 PE=1 SV=3	1.638	4.06977	1	1	1	172	20.1	2.23	1
High	Q53EU2	GATA binding protein 6 variant (Fragment) OS=Homo sapiens PE=2 SV=1	1.629	2.35294	1	1	1	595	60	4.24	1
High	Q7KZI7	Serine/threonine-protein kinase MARK2 OS=Homo sapiens GN=MARK2 PE=1 SV=2	1.621	2.15736	1	1	1	788	87.9	3.45	1
High	Q13228	Selenium-binding protein 1 OS=Homo sapiens GN=SELENBP1 PE=1 SV=2	1.571	2.33051	1	1	1	472	52.4	3.25	1
High	A6NKH3	Putative 60S ribosomal protein L37a-like protein OS=Homo sapiens GN=RPL37AP8 PE=5 SV=2	1.559	8.60215	1	1	1	93	10.6	2.09	1
High	P85037	Forkhead box protein K1 OS=Homo sapiens GN=FOXK1 PE=1 SV=1	1.551	0.95498	1	1	1	733	75.4	1.94	1
High	A6NHQ2	rRNA/tRNA 2'-O-methyltransferase fibrillarin-like protein 1 OS=Homo sapiens GN=FBLL1 PE=3 SV=2	1.548	3.29341	1	1	1	334	34.8	2.84	1
High	A0A024QYX3	RNA binding motif (RNP1, RRM) protein 3, isoform CRA_c OS=Homo sapiens GN=RBM3 PE=4 SV=1	1.534	6.36943	1	1	1	157	17.2	2.6	1
High	P56556	NADH dehydrogenase [ubiquinone] 1 alpha subcomplex subunit 6 OS=Homo sapiens GN=NDUFA6 PE=1 SV=3	1.512	5.19481	1	1	1	154	17.9	2.2	1
High	P23526	Adenosylhomocysteinase OS=Homo sapiens GN=AHCY PE=1 SV=4	1.509	2.77778	1	1	1	432	47.7	3.57	1
High	Q53FR4	Vacuolar protein sorting 35 variant (Fragment) OS=Homo sapiens PE=2 SV=1	1.497	1.25628	1	1	1	796	91.6	3.44	1
High	Q6P4A8	Phospholipase B-like 1 OS=Homo sapiens GN=PLBD1 PE=1 SV=2	1.491	2.16998	1	1	1	553	63.2	3.68	1
High	B4DT31	cDNA FLJ53425, highly similar to Far upstream element-binding protein 1 OS=Homo sapiens PE=2 SV=1	1.482	1.35338	1	1	1	665	69.8	2.91	1
High	P04843	Dolichyl-diphosphooligosaccharide--protein glycosyltransferase subunit 1 OS=Homo sapiens GN=RPN1 PE=1 SV=1	1.481	1.31796	1	1	1	607	68.5	2.44	1
High	O43175	D-3-phosphoglycerate dehydrogenase OS=Homo sapiens GN=PHGDH PE=1 SV=4	1.465	1.68856	1	1	1	533	56.6	2.6	1
High	A0A1B4Z394	Tubulin gamma chain OS=Homo sapiens GN=TUBG2 PE=2 SV=1	1.465	1.95652	1	1	1	460	52.1	3	1
High	O95881	Thioredoxin domain-containing protein 12 OS=Homo sapiens GN=TXNDC12 PE=1 SV=1	1.457	5.23256	1	1	1	172	19.2	2.31	1
High	H6QX63	Hepatocellular carcinoma related protein 2 OS=Homo sapiens PE=2 SV=1	1.456	5.90164	1	1	1	305	34.8	3.83	1
High	Q08211	ATP-dependent RNA helicase A OS=Homo sapiens GN=DHX9 PE=1 SV=4	1.424	0.629921	1	1	1	1270	140.9	2.21	1
High	Q5JR94	40S ribosomal protein S8 OS=Homo sapiens GN=RPS8 PE=2 SV=1	1.377	3.36538	1	1	1	208	24.2	2.43	1
High	Q16610	Extracellular matrix protein 1 OS=Homo sapiens GN=ECM1 PE=1 SV=2	1.375	1.66667	1	1	1	540	60.6	2.27	1
High	Q9BU76	Multiple myeloma tumor-associated protein 2 OS=Homo sapiens GN=MMTAG2 PE=1 SV=1	1.362	3.80228	1	1	1	263	29.4	2.29	1
High	P60866	40S ribosomal protein S20 OS=Homo sapiens GN=RPS20 PE=1 SV=1	1.36	10.084	1	1	1	119	13.4	3.65	1
High	V9HW63	Epididymis secretory sperm binding protein Li 97n OS=Homo sapiens GN=HEL-S-97n PE=2 SV=1	1.35	2.95203	1	1	1	271	30.5	2.3	1
High	G8IFA7	p90 OS=Homo sapiens PE=2 SV=1	1.345	2.7881	1	1	1	538	59.4	4.3	1
High	P54819	Adenylate kinase 2, mitochondrial OS=Homo sapiens GN=AK2 PE=1 SV=2	1.345	4.1841	1	1	1	239	26.5	3.05	1
High	P07737	Profilin-1 OS=Homo sapiens GN=PFN1 PE=1 SV=2	1.344	5.71429	1	1	1	140	15	2.04	1
High	A8K2T7	Receptor protein-tyrosine kinase OS=Homo sapiens PE=2 SV=1	1.342	0.661157	1	1	1	1210	134.1	2.57	1
High	A0A161I202	Lactoferrin OS=Homo sapiens GN=LTF PE=2 SV=1	1.319	1.40647	1	1	1	711	78.3	2.68	1
High	Q9NRX2	39S ribosomal protein L17, mitochondrial OS=Homo sapiens GN=MRPL17 PE=1 SV=1	1.314	4.57143	1	1	1	175	20	2.42	1
High	B3KTS5	cDNA FLJ38670 fis, clone HSYRA2000190, highly similar to Voltage-dependent anion-selective channel protein 1 OS=Homo sapiens PE=2 SV=1	1.312	3.53357	1	1	1	283	30.7	2.5	1
High	Q5T749	Keratinocyte proline-rich protein OS=Homo sapiens GN=KPRP PE=1 SV=1	1.303	1.38169	1	2	1	579	64.1	1.88	1
High	Q9Y5M8	Signal recognition particle receptor subunit beta OS=Homo sapiens GN=SRPRB PE=1 SV=3	1.302	7.01107	1	2	1	271	29.7	7.18	1
High	B2R6S5	UMP-CMP kinase OS=Homo sapiens GN=CMPK PE=2 SV=1	1.3	3.50877	1	1	1	228	25.8	1.67	1
High	Q8NBN7	Retinol dehydrogenase 13 OS=Homo sapiens GN=RDH13 PE=1 SV=2	1.293	2.41692	1	1	1	331	35.9	2.14	1
High	P48307	Tissue factor pathway inhibitor 2 OS=Homo sapiens GN=TFPI2 PE=1 SV=1	1.291	6.38298	1	1	1	235	26.9	3.51	1
High	Q86WA8	Lon protease homolog 2, peroxisomal OS=Homo sapiens GN=LONP2 PE=1 SV=1	1.289	1.64319	1	1	1	852	94.6	3.61	1
High	O75396	Vesicle-trafficking protein SEC22b OS=Homo sapiens GN=SEC22B PE=1 SV=4	1.287	6.51163	1	1	1	215	24.6	3.66	1
High	E9PIE3	Protein kinase C delta-binding protein OS=Homo sapiens GN=PRKCDBP PE=1 SV=1	1.274	3.07167	1	1	1	293	31.1	2.64	1
High	A9UFC0	Caspase 14 OS=Homo sapiens GN=CASP14 PE=2 SV=1	1.268	5.3719	1	1	1	242	27.6	3.23	1
High	P28072	Proteasome subunit beta type-6 OS=Homo sapiens GN=PSMB6 PE=1 SV=4	1.257	4.60251	1	1	1	239	25.3	3.18	1
High	B4DRM3	cDNA FLJ54492, highly similar to Eukaryotic translation initiation factor 4B OS=Homo sapiens PE=2 SV=1	1.248	1.2987	1	1	1	616	69.7	2.12	1
High	Q9P2N5	RNA-binding protein 27 OS=Homo sapiens GN=RBM27 PE=1 SV=2	1.231	1.13208	1	1	1	1060	118.6	2.76	1
High	Q9NSI2	Protein FAM207A OS=Homo sapiens GN=FAM207A PE=1 SV=2	1.227	4.78261	1	2	1	230	25.4	8.11	1
High	P08574	Cytochrome c1, heme protein, mitochondrial OS=Homo sapiens GN=CYC1 PE=1 SV=3	1.208	4.92308	1	1	1	325	35.4	4.01	1
High	P12270	Nucleoprotein TPR OS=Homo sapiens GN=TPR PE=1 SV=3	1.166	0.804063	1	1	1	2363	267.1	4.14	1
High	C9JYA1	Nucleoporin-like protein 2 (Fragment) OS=Homo sapiens GN=NUPL2 PE=1 SV=1	1.164	2.75862	1	1	1	435	46.4	2.22	1
Medium	E3WH17	Tyrosine-protein kinase receptor OS=Homo sapiens GN=SQSTM1-ALK PE=2 SV=1	1.151	2.457	1	1	1	814	89.9	3.73	1
Medium	Q15019	Septin-2 OS=Homo sapiens GN=SEPT2 PE=1 SV=1	1.138	3.3241	1	1	1	361	41.5	3.48	1
Medium	Q13784	APOA4 protein (Fragment) OS=Homo sapiens GN=APOA4 PE=2 SV=1	1.129	3.27869	1	1	1	244	28.1	3.03	1
Medium	A0A024QYR3	Transmembrane 9 superfamily member OS=Homo sapiens PE=2 SV=1	1.104	2.9595	1	1	1	642	74.5	4.2	1
Medium	P16401	Histone H1.5 OS=Homo sapiens GN=HIST1H1B PE=1 SV=3	1.103	3.9823	1	1	1	226	22.6	2.49	1
Medium	P06733	Alpha-enolase OS=Homo sapiens GN=ENO1 PE=1 SV=2	1.097	5.99078	1	1	1	434	47.1	4.52	1
Medium	P35249	Replication factor C subunit 4 OS=Homo sapiens GN=RFC4 PE=1 SV=2	1.089	2.75482	1	1	1	363	39.7	2.9	1
Medium	B8XFT4	Notch 3-like protein (Fragment) OS=Homo sapiens GN=NOTCH3 PE=4 SV=1	1.086	57.5	1	1	1	40	4.4	3.55	1
Medium	B4DR52	Histone H2B OS=Homo sapiens PE=2 SV=1	1.072	5.42169	1	1	1	166	18	2.34	1
Medium	P49720	Proteasome subunit beta type-3 OS=Homo sapiens GN=PSMB3 PE=1 SV=2	1.071	7.80488	1	1	1	205	22.9	3.62	1
Medium	Q6IPI1	Ribosomal protein L29 OS=Homo sapiens GN=RPL29 PE=2 SV=1	1.07	9.31677	1	1	1	161	17.9	4.2	1
Medium	A0A0U1RQC9	Cellular tumor antigen p53 OS=Homo sapiens GN=TP53 PE=1 SV=1	1.07	1.70732	1	1	1	410	45.9	0	1
Medium	O43896	Kinesin-like protein KIF1C OS=Homo sapiens GN=KIF1C PE=1 SV=3	1.045	1.08794	1	1	1	1103	122.9	3.49	1
Medium	Q8N393	Zinc finger protein 786 OS=Homo sapiens GN=ZNF786 PE=2 SV=2	1.043	1.53453	1	1	1	782	89.8	3.43	1
Medium	Q15366	Poly(rC)-binding protein 2 OS=Homo sapiens GN=PCBP2 PE=1 SV=1	1.041	3.56164	1	1	1	365	38.6	4.23	1

## Sheet: OVCAR Trypsin Repl 2
Protein FDR Confidence	UniProt ID	Description	Sum PEP Score	Coverage	# Peptides	# PSMs	# Unique Peptides	# AAs	MW [kDa]	Score Sequest HT	# Peptides Sequest HT
High	P07437	Tubulin beta chain OS=Homo sapiens GN=TUBB PE=1 SV=2	157.118	71.3964	25	266	4	444	49.6	965.16	25
High	P04350	Tubulin beta-4A chain OS=Homo sapiens GN=TUBB4A PE=1 SV=2	153.778	63.7387	23	263	3	444	49.6	941.18	23
High	Q9BVA1	Tubulin beta-2B chain OS=Homo sapiens GN=TUBB2B PE=1 SV=1	146.317	65.3933	25	266	1	445	49.9	942.27	25
High	Q13885	Tubulin beta-2A chain OS=Homo sapiens GN=TUBB2A PE=1 SV=1	145.689	65.3933	25	267	1	445	49.9	945.74	25
High	H6VRG1	Keratin 1 OS=Homo sapiens GN=KRT1 PE=3 SV=1	144.106	60.155	40	103	34	645	66.1	378.89	40
High	Q05BQ2	TIPARP protein (Fragment) OS=Homo sapiens GN=TIPARP PE=2 SV=1	142.251	40.303	24	162	24	660	76.6	588.71	24
High	P35527	Keratin, type I cytoskeletal 9 OS=Homo sapiens GN=KRT9 PE=1 SV=3	110.658	61.1557	28	80	27	623	62	287.82	28
High	Q13509	Tubulin beta-3 chain OS=Homo sapiens GN=TUBB3 PE=1 SV=2	109.813	58.8889	21	235	5	450	50.4	804.8	21
High	Q1ZYQ1	Tubulin alpha chain OS=Homo sapiens GN=TUBA2 PE=2 SV=1	105.045	53.1111	19	143	3	450	49.9	552.85	19
High	B3KML9	cDNA FLJ11352 fis, clone HEMBA1000020, highly similar to Tubulin beta-2C chain OS=Homo sapiens PE=2 SV=1	96.358	47.6071	18	236	2	397	44.6	785.41	18
High	P13645	Keratin, type I cytoskeletal 10 OS=Homo sapiens GN=KRT10 PE=1 SV=6	92.827	55.8219	29	70	26	584	58.8	246.47	29
High	P68366	Tubulin alpha-4A chain OS=Homo sapiens GN=TUBA4A PE=1 SV=1	90.253	51.1161	17	107	4	448	49.9	436.6	17
High	P35908	Keratin, type II cytoskeletal 2 epidermal OS=Homo sapiens GN=KRT2 PE=1 SV=2	89.078	70.892	33	56	25	639	65.4	188.84	33
High	F5H5D3	Tubulin alpha chain OS=Homo sapiens GN=TUBA1C PE=1 SV=1	86.665	46.0501	19	88	4	519	57.7	332.34	19
High	B2RBS8	cDNA, FLJ95666, highly similar to Homo sapiens albumin (ALB), mRNA OS=Homo sapiens PE=2 SV=1	83.873	50.0821	34	62	34	609	69.3	189.61	34
High	P09874	Poly [ADP-ribose] polymerase 1 OS=Homo sapiens GN=PARP1 PE=1 SV=4	82.619	36.8836	34	44	34	1014	113	136.49	34
High	P21333	Filamin-A OS=Homo sapiens GN=FLNA PE=1 SV=4	78.835	19.6827	33	33	32	2647	280.6	119.15	33
High	Q2NKY5	Tubulin beta chain OS=Homo sapiens GN=TUBB6 PE=2 SV=1	77.641	40.0447	17	141	1	447	50.1	466.52	17
High	Q9BUF5	Tubulin beta-6 chain OS=Homo sapiens GN=TUBB6 PE=1 SV=1	72.055	40.3587	16	134	1	446	49.8	455.31	16
High	Q3ZCM7	Tubulin beta-8 chain OS=Homo sapiens GN=TUBB8 PE=1 SV=2	64.576	26.3514	11	125	1	444	49.7	436.62	11
High	P63261	Actin, cytoplasmic 2 OS=Homo sapiens GN=ACTG1 PE=1 SV=1	63.536	48.8	14	35	8	375	41.8	125.92	14
High	A0A0S2Z428	HCG2039812, isoform CRA_b (Fragment) OS=Homo sapiens GN=KRT6A PE=2 SV=1	63.342	46.6312	24	33	3	564	60	109.6	24
High	P04259	Keratin, type II cytoskeletal 6B OS=Homo sapiens GN=KRT6B PE=1 SV=5	60.363	43.7943	23	29	1	564	60	95.49	23
High	P13647	Keratin, type II cytoskeletal 5 OS=Homo sapiens GN=KRT5 PE=1 SV=3	56.597	38.6441	23	34	3	590	62.3	101.52	23
High	V9HW22	Epididymis luminal protein 33 OS=Homo sapiens GN=HEL-S-72p PE=2 SV=1	55.887	30.031	18	31	11	646	70.9	107.69	18
High	P15924	Desmoplakin OS=Homo sapiens GN=DSP PE=1 SV=3	55.575	10.31	22	27	22	2871	331.6	91.4	22
High	B4E1T1	cDNA FLJ54081, highly similar to Keratin, type II cytoskeletal 5 OS=Homo sapiens PE=2 SV=1	52.637	37.4775	21	31	0	555	58.8	92.7	21
High	Q86YZ3	Hornerin OS=Homo sapiens GN=HRNR PE=1 SV=2	49.568	17.0877	17	21	17	2850	282.2	70.07	17
High	P10809	60 kDa heat shock protein, mitochondrial OS=Homo sapiens GN=HSPD1 PE=1 SV=2	46.263	38.7435	17	21	17	573	61	75.8	17
High	O00622	Protein CYR61 OS=Homo sapiens GN=CYR61 PE=1 SV=1	45.187	51.4436	16	24	16	381	42	76.24	16
High	O43707	Alpha-actinin-4 OS=Homo sapiens GN=ACTN4 PE=1 SV=2	44.526	26.8935	18	21	11	911	104.8	71.79	18
High	P02533	Keratin, type I cytoskeletal 14 OS=Homo sapiens GN=KRT14 PE=1 SV=4	43.145	44.7034	18	34	8	472	51.5	105.91	18
High	P68104	Elongation factor 1-alpha 1 OS=Homo sapiens GN=EEF1A1 PE=1 SV=1	42.711	37.6623	13	26	13	462	50.1	93.16	13
High	V9HW31	ATP synthase subunit beta OS=Homo sapiens GN=HEL-S-271 PE=1 SV=1	39.139	38.3743	12	18	12	529	56.5	69.28	12
High	V9HWB4	Epididymis secretory sperm binding protein Li 89n OS=Homo sapiens GN=HEL-S-89n PE=2 SV=1	37.044	23.7003	12	15	11	654	72.3	53.97	12
High	J3KPS3	Fructose-bisphosphate aldolase OS=Homo sapiens GN=ALDOA PE=1 SV=1	36.295	52.1739	12	15	12	368	39.8	58.39	12
High	P04406	Glyceraldehyde-3-phosphate dehydrogenase OS=Homo sapiens GN=GAPDH PE=1 SV=3	34.301	40.8955	9	13	9	335	36	50.5	9
High	J3KTA4	Probable ATP-dependent RNA helicase DDX5 OS=Homo sapiens GN=DDX5 PE=1 SV=1	33.648	24.43	13	18	8	614	69	56.86	13
High	Q9Y305	Acyl-coenzyme A thioesterase 9, mitochondrial OS=Homo sapiens GN=ACOT9 PE=1 SV=2	33.224	31.2073	12	17	12	439	49.9	53.82	12
High	P08779	Keratin, type I cytoskeletal 16 OS=Homo sapiens GN=KRT16 PE=1 SV=4	32.645	35.518	16	30	8	473	51.2	88.29	16
High	P12814	Alpha-actinin-1 OS=Homo sapiens GN=ACTN1 PE=1 SV=2	31.395	18.8341	12	12	5	892	103	42.71	12
High	Q9NUL7	Probable ATP-dependent RNA helicase DDX28 OS=Homo sapiens GN=DDX28 PE=1 SV=2	31.307	32.5926	13	15	13	540	59.5	57.19	13
High	Q59F66	DEAD box polypeptide 17 isoform p82 variant (Fragment) OS=Homo sapiens PE=2 SV=1	31	22.9308	13	16	8	737	81	49.41	13
High	A0A140VK53	Testicular secretory protein Li 53 OS=Homo sapiens PE=2 SV=1	30.515	7.8125	14	14	14	2752	299.4	48.69	14
High	P29401	Transketolase OS=Homo sapiens GN=TKT PE=1 SV=3	30.372	25.8427	11	13	11	623	67.8	49.49	11
High	P49327	Fatty acid synthase OS=Homo sapiens GN=FASN PE=1 SV=3	29.65	8.08443	13	14	13	2511	273.3	49.06	13
High	P08238	Heat shock protein HSP 90-beta OS=Homo sapiens GN=HSP90AB1 PE=1 SV=4	28.899	20.9945	10	10	6	724	83.2	37.22	10
High	P02787	Serotransferrin OS=Homo sapiens GN=TF PE=1 SV=3	28.398	19.341	12	13	12	698	77	38.88	12
High	A0A024R1X8	Junction plakoglobin, isoform CRA_a OS=Homo sapiens GN=JUP PE=4 SV=1	28.344	19.1946	12	13	12	745	81.7	42.53	12
High	P52272	Heterogeneous nuclear ribonucleoprotein M OS=Homo sapiens GN=HNRNPM PE=1 SV=3	27.947	18.7671	11	14	11	730	77.5	45.73	11
High	V9HW26	ATP synthase subunit alpha OS=Homo sapiens GN=HEL-S-123m PE=2 SV=1	27.818	19.8915	9	10	9	553	59.7	33.93	9
High	P00558	Phosphoglycerate kinase 1 OS=Homo sapiens GN=PGK1 PE=1 SV=3	27.546	35.012	9	10	9	417	44.6	39.02	9
High	Q8N1C8	HSPA9 protein (Fragment) OS=Homo sapiens GN=HSPA9 PE=2 SV=1	27.033	21.1454	10	11	10	681	73.8	43.48	10
High	P54652	Heat shock-related 70 kDa protein 2 OS=Homo sapiens GN=HSPA2 PE=1 SV=1	26.42	13.302	8	14	1	639	70	48.69	8
High	P23396	40S ribosomal protein S3 OS=Homo sapiens GN=RPS3 PE=1 SV=2	26.391	61.7284	13	16	13	243	26.7	48.04	13
High	A0A024R5Z7	Annexin OS=Homo sapiens GN=ANXA2 PE=3 SV=1	26.26	33.9233	10	11	10	339	38.6	33.35	10
High	A0A024R1Q8	Ribosomal protein L23, isoform CRA_b OS=Homo sapiens GN=RPL23 PE=3 SV=1	26.125	60	7	29	7	140	14.9	106.34	7
High	P27635	60S ribosomal protein L10 OS=Homo sapiens GN=RPL10 PE=1 SV=4	25.895	35.9813	6	18	6	214	24.6	51.46	6
High	P48047	ATP synthase subunit O, mitochondrial OS=Homo sapiens GN=ATP5O PE=1 SV=1	25.69	50.7042	8	14	8	213	23.3	46.63	8
High	A7MD96	SYNPO protein (Fragment) OS=Homo sapiens GN=SYNPO PE=2 SV=1	25.319	19.053	10	10	10	887	94.7	36.17	10
High	A0A024R321	Filamin B, beta (Actin binding protein 278), isoform CRA_a OS=Homo sapiens GN=FLNB PE=4 SV=1	25.157	6.36918	12	12	11	2622	280.3	44.39	12
High	P13674	Prolyl 4-hydroxylase subunit alpha-1 OS=Homo sapiens GN=P4HA1 PE=1 SV=2	25.03	23.221	9	11	9	534	61	38.26	9
High	G8JLB6	Heterogeneous nuclear ribonucleoprotein H OS=Homo sapiens GN=HNRNPH1 PE=1 SV=1	24.735	29.2373	10	10	5	472	51.2	36.27	10
High	A0A024R4K3	Malate dehydrogenase OS=Homo sapiens GN=MDH2 PE=2 SV=1	24.622	34.6154	9	10	9	338	35.5	34.7	9
High	P07900	Heat shock protein HSP 90-alpha OS=Homo sapiens GN=HSP90AA1 PE=1 SV=5	24.436	15.4372	9	10	5	732	84.6	30.24	9
High	P62701	40S ribosomal protein S4, X isoform OS=Homo sapiens GN=RPS4X PE=1 SV=2	24.281	37.6426	9	14	9	263	29.6	43.09	9
High	Q9UPN4	Centrosomal protein of 131 kDa OS=Homo sapiens GN=CEP131 PE=1 SV=3	23.857	12.373	10	11	10	1083	122.1	39.39	10
High	Q01813	ATP-dependent 6-phosphofructokinase, platelet type OS=Homo sapiens GN=PFKP PE=1 SV=2	23.703	19.7704	11	11	10	784	85.5	38.67	11
High	P39023	60S ribosomal protein L3 OS=Homo sapiens GN=RPL3 PE=1 SV=2	23.405	25.8065	8	10	8	403	46.1	37.51	8
High	A0A024R1A3	Testicular secretory protein Li 63 OS=Homo sapiens GN=UBE1 PE=2 SV=1	23.363	13.5161	9	9	9	1058	117.8	33.08	9
High	V9HWB8	Pyruvate kinase OS=Homo sapiens GN=HEL-S-30 PE=1 SV=1	23.322	26.742	9	9	9	531	57.9	33.91	9
High	P08729	Keratin, type II cytoskeletal 7 OS=Homo sapiens GN=KRT7 PE=1 SV=5	23.081	21.7484	10	15	7	469	51.4	48.09	10
High	F2Z2W7	tRNA (uracil-5-)-methyltransferase homolog A OS=Homo sapiens GN=TRMT2A PE=1 SV=1	21.948	14.93	7	8	7	643	70.8	27.97	7
High	Q00839	Heterogeneous nuclear ribonucleoprotein U OS=Homo sapiens GN=HNRNPU PE=1 SV=6	21.689	14.5455	10	11	10	825	90.5	35.93	10
High	P55795	Heterogeneous nuclear ribonucleoprotein H2 OS=Homo sapiens GN=HNRNPH2 PE=1 SV=1	21.67	26.0579	8	9	3	449	49.2	33.55	8
High	A0A024R0M6	Translocase of inner mitochondrial membrane 50 homolog (Yeast), isoform CRA_b OS=Homo sapiens GN=TIMM50 PE=4 SV=1	21.659	16.0088	5	7	5	456	50.4	30.41	5
High	A8K3K1	cDNA FLJ78096, highly similar to Homo sapiens actin, alpha, cardiac muscle (ACTC), mRNA OS=Homo sapiens PE=2 SV=1	21.481	22.0159	7	17	1	377	42	52.22	7
High	Q04695	Keratin, type I cytoskeletal 17 OS=Homo sapiens GN=KRT17 PE=1 SV=2	20.939	26.6204	11	19	4	432	48.1	52.95	11
High	P05787	Keratin, type II cytoskeletal 8 OS=Homo sapiens GN=KRT8 PE=1 SV=7	20.823	20.7039	11	17	6	483	53.7	50.8	11
High	O60716	Catenin delta-1 OS=Homo sapiens GN=CTNND1 PE=1 SV=1	20.627	10.7438	8	9	8	968	108.1	31.96	8
High	A0A024R1N4	X-ray repair complementing defective repair in Chinese hamster cells 6 (Ku autoantigen, 70kDa), isoform CRA_a OS=Homo sapiens GN=XRCC6 PE=4 SV=1	20.312	15.1067	7	7	7	609	69.8	23.78	7
High	P62280	40S ribosomal protein S11 OS=Homo sapiens GN=RPS11 PE=1 SV=3	20.254	44.9367	8	12	8	158	18.4	32.16	8
High	Q5EC54	Heterogeneous nuclear ribonucleoprotein K transcript variant OS=Homo sapiens GN=HNRPK PE=2 SV=1	19.735	28.6638	8	11	8	464	51	37.81	8
High	A0A0A0MQS1	Pyrroline-5-carboxylate reductase OS=Homo sapiens GN=PYCRL PE=1 SV=1	19.683	35.3147	7	8	7	286	29.9	29.96	7
High	P09622	Dihydrolipoyl dehydrogenase, mitochondrial OS=Homo sapiens GN=DLD PE=1 SV=2	19.61	17.4853	6	6	6	509	54.1	23.79	6
High	V9HW43	Epididymis secretory protein Li 102 OS=Homo sapiens GN=HEL-S-102 PE=2 SV=1	19.334	44.878	6	9	6	205	22.8	35.69	6
High	P43686	26S protease regulatory subunit 6B OS=Homo sapiens GN=PSMC4 PE=1 SV=2	18.874	20.0957	7	9	7	418	47.3	30.39	7
High	A0A0S2Z491	Nucleophosmin isoform 2 (Fragment) OS=Homo sapiens GN=NPM1 PE=2 SV=1	18.731	18.7075	4	5	4	294	32.6	20.1	4
High	Q99988	Growth/differentiation factor 15 OS=Homo sapiens GN=GDF15 PE=1 SV=3	18.275	34.4156	8	9	8	308	34.1	28.43	8
High	A0A024R374	Cathepsin B, isoform CRA_a OS=Homo sapiens GN=CTSB PE=3 SV=1	18.045	21.5339	6	6	6	339	37.8	21.14	6
High	Q6MZW0	Putative uncharacterized protein DKFZp686J11235 (Fragment) OS=Homo sapiens GN=DKFZp686J11235 PE=1 SV=1	17.991	14.2292	6	8	3	506	54.4	25.22	6
High	P15880	40S ribosomal protein S2 OS=Homo sapiens GN=RPS2 PE=1 SV=2	17.934	24.9147	7	11	7	293	31.3	35.04	7
High	Q14257	Reticulocalbin-2 OS=Homo sapiens GN=RCN2 PE=1 SV=1	17.791	25.5521	8	9	8	317	36.9	30.79	8
High	P13667	Protein disulfide-isomerase A4 OS=Homo sapiens GN=PDIA4 PE=1 SV=2	17.621	16.7442	7	10	7	645	72.9	26.28	7
High	P30101	Protein disulfide-isomerase A3 OS=Homo sapiens GN=PDIA3 PE=1 SV=4	17.553	19.604	9	9	9	505	56.7	27.89	9
High	B4DR52	Histone H2B OS=Homo sapiens PE=2 SV=1	17.518	31.3253	6	8	2	166	18	24.2	6
High	B4DI54	cDNA FLJ56386, highly similar to Heat shock 70 kDa protein 1L OS=Homo sapiens PE=2 SV=1	17.482	8.93617	5	9	1	705	77.5	31.37	5
High	P38159	RNA-binding motif protein, X chromosome OS=Homo sapiens GN=RBMX PE=1 SV=3	17.405	22.5064	9	14	3	391	42.3	39.86	9
High	V9HW88	Calreticulin, isoform CRA_b OS=Homo sapiens GN=HEL-S-99n PE=2 SV=1	17.238	17.7458	6	7	6	417	48.1	22.12	6
High	Q53SS8	Epididymis secretory protein Li 85 OS=Homo sapiens GN=PCBP1 PE=2 SV=1	17.171	27.2472	6	6	4	356	37.5	22.6	6
High	A0A024RAZ7	Heterogeneous nuclear ribonucleoprotein A1, isoform CRA_b OS=Homo sapiens GN=HNRPA1 PE=4 SV=1	16.991	19.8925	6	8	6	372	38.7	28.85	6
High	Q5JR94	40S ribosomal protein S8 OS=Homo sapiens GN=RPS8 PE=2 SV=1	16.901	41.3462	7	10	7	208	24.2	35.52	7
High	P60174	Triosephosphate isomerase OS=Homo sapiens GN=TPI1 PE=1 SV=3	16.843	27.2727	6	6	6	286	30.8	22.18	6
High	P49411	Elongation factor Tu, mitochondrial OS=Homo sapiens GN=TUFM PE=1 SV=2	16.839	23.2301	7	10	7	452	49.5	32.53	7
High	Q7KZI7	Serine/threonine-protein kinase MARK2 OS=Homo sapiens GN=MARK2 PE=1 SV=2	16.627	10.9137	6	6	6	788	87.9	21.99	6
High	P07737	Profilin-1 OS=Homo sapiens GN=PFN1 PE=1 SV=2	16.566	62.8571	7	9	7	140	15	30.64	7
High	Q59EJ3	Heat shock 70kDa protein 1A variant (Fragment) OS=Homo sapiens PE=2 SV=1	16.546	10.1551	6	7	2	709	77.4	24.34	6
High	A0A158RFU6	RAB7, member RAS oncogene family, isoform CRA_a OS=Homo sapiens GN=RAB7A PE=2 SV=1	16.509	40.5797	6	6	6	207	23.5	22.27	6
High	A8K132	cDNA FLJ75476, highly similar to Homo sapiens glutaminase (GLS), mRNA OS=Homo sapiens PE=2 SV=1	16.483	15.2466	6	6	6	669	73.5	22	6
High	A0A0A6YYL6	Protein RPL17-C18orf32 OS=Homo sapiens GN=RPL17-C18orf32 PE=3 SV=1	16.449	21.9298	4	7	4	228	26.4	24.73	4
High	P85037	Forkhead box protein K1 OS=Homo sapiens GN=FOXK1 PE=1 SV=1	16.389	14.1883	6	6	6	733	75.4	23.43	6
High	P14625	Endoplasmin OS=Homo sapiens GN=HSP90B1 PE=1 SV=1	16.244	11.9552	7	7	7	803	92.4	22.09	7
High	P13639	Elongation factor 2 OS=Homo sapiens GN=EEF2 PE=1 SV=4	16.207	8.74126	6	6	6	858	95.3	19.05	6
High	P08237	ATP-dependent 6-phosphofructokinase, muscle type OS=Homo sapiens GN=PFKM PE=1 SV=2	16.049	10.8974	6	6	5	780	85.1	20.72	6
High	H0Y2W2	ATPase family AAA domain-containing protein 3A (Fragment) OS=Homo sapiens GN=ATAD3A PE=1 SV=1	16.015	13.2867	7	7	7	572	64.3	22.51	7
High	P34932	Heat shock 70 kDa protein 4 OS=Homo sapiens GN=HSPA4 PE=1 SV=4	15.99	9.40476	5	5	4	840	94.3	18.59	5
High	A0A0D9SF53	ATP-dependent RNA helicase DDX3X OS=Homo sapiens GN=DDX3X PE=1 SV=1	15.977	10.6412	7	10	6	733	81.4	30.44	7
High	Q59GY2	Ribosomal protein L4 variant (Fragment) OS=Homo sapiens PE=2 SV=1	15.922	15.4195	5	5	5	441	49	18.4	5
High	P46013	Proliferation marker protein Ki-67 OS=Homo sapiens GN=MKI67 PE=1 SV=2	15.907	3.90049	7	7	7	3256	358.5	24.06	7
High	Q08945	FACT complex subunit SSRP1 OS=Homo sapiens GN=SSRP1 PE=1 SV=1	15.722	10.1551	6	6	6	709	81	20.61	6
High	Q16822	Phosphoenolpyruvate carboxykinase [GTP], mitochondrial OS=Homo sapiens GN=PCK2 PE=1 SV=3	15.536	11.25	5	5	5	640	70.7	18.09	5
High	V9HWE9	Epididymis secretory protein Li 22 OS=Homo sapiens GN=HEL-S-22 PE=2 SV=1	15.501	39.0476	5	6	4	210	23.3	26.48	5
High	P05023	Sodium/potassium-transporting ATPase subunit alpha-1 OS=Homo sapiens GN=ATP1A1 PE=1 SV=1	15.328	7.23363	6	6	6	1023	112.8	20.18	6
High	Q9HBB3	60S ribosomal protein L6 OS=Homo sapiens PE=2 SV=1	15.13	20.7612	6	7	6	289	32.9	18.93	6
High	P46459	Vesicle-fusing ATPase OS=Homo sapiens GN=NSF PE=1 SV=3	15.006	10.4839	6	7	6	744	82.5	23.56	6
High	O43175	D-3-phosphoglycerate dehydrogenase OS=Homo sapiens GN=PHGDH PE=1 SV=4	14.975	16.8856	6	6	6	533	56.6	21.7	6
High	P62424	60S ribosomal protein L7a OS=Homo sapiens GN=RPL7A PE=1 SV=2	14.776	30.8271	8	8	8	266	30	25	8
High	P22626	Heterogeneous nuclear ribonucleoproteins A2/B1 OS=Homo sapiens GN=HNRNPA2B1 PE=1 SV=2	14.747	24.6459	6	7	6	353	37.4	22.8	6
High	B2R8Z8	cDNA, FLJ94136, highly similar to Homo sapiens synaptotagmin binding, cytoplasmic RNA interacting protein (SYNCRIP), mRNA OS=Homo sapiens PE=2 SV=1	14.682	11.7175	7	7	4	623	69.6	21.05	7
High	P30837	Aldehyde dehydrogenase X, mitochondrial OS=Homo sapiens GN=ALDH1B1 PE=1 SV=3	14.488	14.8936	5	6	4	517	57.2	21.63	5
High	V9HW80	Epididymis luminal protein 220 OS=Homo sapiens GN=HEL-S-70 PE=2 SV=1	14.326	7.69231	5	6	5	806	89.3	20.3	5
High	C9J6P4	Zinc finger CCCH-type antiviral protein 1 OS=Homo sapiens GN=ZC3HAV1 PE=1 SV=1	14.112	9.86328	7	8	7	1024	114	24.65	7
High	Q16630	Cleavage and polyadenylation specificity factor subunit 6 OS=Homo sapiens GN=CPSF6 PE=1 SV=2	13.999	12.3412	5	5	5	551	59.2	18.6	5
High	P83731	60S ribosomal protein L24 OS=Homo sapiens GN=RPL24 PE=1 SV=1	13.978	36.3057	6	11	6	157	17.8	29.34	6
High	O75616	GTPase Era, mitochondrial OS=Homo sapiens GN=ERAL1 PE=1 SV=2	13.964	21.0526	5	5	5	437	48.3	19.45	5
High	P62195	26S protease regulatory subunit 8 OS=Homo sapiens GN=PSMC5 PE=1 SV=1	13.904	17.9803	6	7	5	406	45.6	23.36	6
High	P06899	Histone H2B type 1-J OS=Homo sapiens GN=HIST1H2BJ PE=1 SV=3	13.88	41.2698	5	7	1	126	13.9	20.95	5
High	A0A024R9Y6	Guanine nucleotide binding protein-like 3 (Nucleolar)-like, isoform CRA_a OS=Homo sapiens GN=GNL3L PE=4 SV=1	13.819	11.6838	5	5	5	582	65.5	18.91	5
High	Q02413	Desmoglein-1 OS=Homo sapiens GN=DSG1 PE=1 SV=2	13.717	5.81506	4	5	4	1049	113.7	17.19	4
High	Q6NVC0	SLC25A5 protein (Fragment) OS=Homo sapiens GN=SLC25A5 PE=2 SV=1	13.653	20.1238	6	6	3	323	35.3	19.97	6
High	P22087	rRNA 2'-O-methyltransferase fibrillarin OS=Homo sapiens GN=FBL PE=1 SV=2	13.571	20.8723	5	5	5	321	33.8	16.8	5
High	D6REE5	Receptor of-activated protein C kinase 1 (Fragment) OS=Homo sapiens GN=RACK1 PE=1 SV=1	13.278	20.5607	4	4	4	321	34.9	14.71	4
High	A0A024QZW7	Nucleoporin 153kDa, isoform CRA_a OS=Homo sapiens GN=NUP153 PE=4 SV=1	13.254	5.08475	5	5	5	1475	153.9	19.85	5
High	P62979	Ubiquitin-40S ribosomal protein S27a OS=Homo sapiens GN=RPS27A PE=1 SV=2	13.189	42.3077	5	5	5	156	18	17	5
High	P14866	Heterogeneous nuclear ribonucleoprotein L OS=Homo sapiens GN=HNRNPL PE=1 SV=2	13.136	9.50764	4	5	4	589	64.1	19.96	4
High	A0A1B1RVA9	Lipoprotein lipase OS=Homo sapiens GN=LPL PE=3 SV=1	13.029	10.5263	3	3	3	475	53.1	14.27	3
High	P06733	Alpha-enolase OS=Homo sapiens GN=ENO1 PE=1 SV=2	12.998	15.8986	5	5	5	434	47.1	17.09	5
High	A0A024R7T3	Heterogeneous nuclear ribonucleoprotein F, isoform CRA_a OS=Homo sapiens GN=HNRPF PE=4 SV=1	12.958	17.3494	6	6	5	415	45.6	18.31	6
High	P22695	Cytochrome b-c1 complex subunit 2, mitochondrial OS=Homo sapiens GN=UQCRC2 PE=1 SV=3	12.955	12.362	4	4	4	453	48.4	14.36	4
High	P21796	Voltage-dependent anion-selective channel protein 1 OS=Homo sapiens GN=VDAC1 PE=1 SV=2	12.955	19.788	4	4	4	283	30.8	15	4
High	P12268	Inosine-5'-monophosphate dehydrogenase 2 OS=Homo sapiens GN=IMPDH2 PE=1 SV=2	12.954	13.4241	5	5	5	514	55.8	19.94	5
High	Q06830	Peroxiredoxin-1 OS=Homo sapiens GN=PRDX1 PE=1 SV=1	12.94	40.7035	7	7	6	199	22.1	22.55	7
High	P27824	Calnexin OS=Homo sapiens GN=CANX PE=1 SV=2	12.881	10.9797	5	6	5	592	67.5	20.67	5
High	Q14240	Eukaryotic initiation factor 4A-II OS=Homo sapiens GN=EIF4A2 PE=1 SV=2	12.848	14.9877	5	6	4	407	46.4	19.46	5
High	B2R4R0	Histone H4 OS=Homo sapiens GN=HIST1H4J PE=2 SV=1	12.744	50.4854	5	10	5	103	11.4	30.4	5
High	Q59GX9	Ribosomal protein L5 variant (Fragment) OS=Homo sapiens PE=2 SV=1	12.725	18.8119	4	4	4	303	35.2	14.63	4
High	A8MXP9	Matrin-3 OS=Homo sapiens GN=MATR3 PE=1 SV=1	12.675	7.26257	4	4	4	895	99.9	16.22	4
High	Q96E39	RNA binding motif protein, X-linked-like-1 OS=Homo sapiens GN=RBMXL1 PE=1 SV=1	12.633	18.4615	7	9	1	390	42.1	26.48	7
High	A8K690	cDNA FLJ76863, highly similar to Homo sapiens stress-induced-phosphoprotein 1 (Hsp70/Hsp90-organizing protein) (STIP1), mRNA OS=Homo sapiens PE=2 SV=1	12.583	14.1805	5	6	5	543	62.6	20.47	5
High	A0A1B2JLU7	Pyrroline-5-carboxylate reductase OS=Homo sapiens GN=PYCR1 PE=3 SV=1	12.494	15.674	4	5	4	319	33.4	16.27	4
High	P07954	Fumarate hydratase, mitochondrial OS=Homo sapiens GN=FH PE=1 SV=3	12.491	19.6078	5	5	5	510	54.6	19.62	5
High	Q53HB3	Proteasome 26S ATPase subunit 1 variant (Fragment) OS=Homo sapiens PE=1 SV=1	12.476	15.6818	6	7	5	440	49.2	23.11	6
High	A0A090N7Y2	ATP-binding cassette, sub-family F (GCN20), member 2 OS=Homo sapiens GN=ABCF2 PE=4 SV=1	12.474	11.3565	6	6	6	634	72.4	18.78	6
High	E9KL48	Epididymis tissue sperm binding protein Li 18mP OS=Homo sapiens GN=GLUD1 PE=2 SV=1	12.352	15.4122	6	6	6	558	61.4	19.93	6
High	Q9NR30	Nucleolar RNA helicase 2 OS=Homo sapiens GN=DDX21 PE=1 SV=5	12.253	8.04598	5	6	5	783	87.3	19.27	5
High	Q59H77	T-complex protein 1 subunit gamma (Fragment) OS=Homo sapiens PE=2 SV=1	12.201	10.052	4	4	4	577	63.5	14.71	4
High	B3KT93	Polyadenylate-binding protein OS=Homo sapiens PE=2 SV=1	12.172	8.6478	4	5	1	636	70.6	17.17	4
High	Q6IPH7	RPL14 protein OS=Homo sapiens GN=RPL14 PE=1 SV=1	12.127	28.6364	5	5	5	220	23.8	15.32	5
High	Q6IQ30	Polyadenylate-binding protein OS=Homo sapiens GN=PABPC4 PE=2 SV=1	11.858	8.0303	4	5	2	660	72.3	18.43	4
High	Q13501	Sequestosome-1 OS=Homo sapiens GN=SQSTM1 PE=1 SV=1	11.78	20.4545	4	4	4	440	47.7	16.31	4
High	P07195	L-lactate dehydrogenase B chain OS=Homo sapiens GN=LDHB PE=1 SV=2	11.697	19.4611	6	6	5	334	36.6	16.52	6
High	P54886	Delta-1-pyrroline-5-carboxylate synthase OS=Homo sapiens GN=ALDH18A1 PE=1 SV=2	11.589	8.1761	4	4	4	795	87.2	14.31	4
High	P13010	X-ray repair cross-complementing protein 5 OS=Homo sapiens GN=XRCC5 PE=1 SV=3	11.571	8.33333	6	7	6	732	82.7	17.75	6
High	Q53F64	Heterogeneous nuclear ribonucleoprotein AB isoform a variant (Fragment) OS=Homo sapiens PE=2 SV=1	11.566	14.759	4	5	3	332	36	16.16	4
High	E9KL44	Epididymis tissue sperm binding protein Li 14m OS=Homo sapiens PE=2 SV=1	11.524	10.0917	5	5	5	763	82.9	17.14	5
High	A0A0U1RRM4	Polypyrimidine tract-binding protein 1 OS=Homo sapiens GN=PTBP1 PE=1 SV=1	11.486	11.5646	6	6	6	588	62.4	16.28	6
High	Q08J23	tRNA (cytosine(34)-C(5))-methyltransferase OS=Homo sapiens GN=NSUN2 PE=1 SV=2	11.458	7.95306	4	4	4	767	86.4	15.53	4
High	A0A0S2Z4Z9	Non-POU domain containing octamer-binding isoform 1 (Fragment) OS=Homo sapiens GN=NONO PE=2 SV=1	11.45	13.3758	4	4	4	471	54.2	15.47	4
High	Q9BVJ6	U3 small nucleolar RNA-associated protein 14 homolog A OS=Homo sapiens GN=UTP14A PE=1 SV=1	11.344	10.3761	5	5	5	771	87.9	17.96	5
High	J3QLS3	28S ribosomal protein S7, mitochondrial OS=Homo sapiens GN=MRPS7 PE=1 SV=1	11.288	27.3063	6	6	6	271	31.7	20.16	6
High	P50990	T-complex protein 1 subunit theta OS=Homo sapiens GN=CCT8 PE=1 SV=4	11.004	11.6788	5	5	5	548	59.6	16.91	5
High	Q14103	Heterogeneous nuclear ribonucleoprotein D0 OS=Homo sapiens GN=HNRNPD PE=1 SV=1	10.908	17.7465	5	6	4	355	38.4	17.53	5
High	J3KPS0	DnaJ (Hsp40) homolog, subfamily B, member 12, isoform CRA_c OS=Homo sapiens GN=DNAJB12 PE=1 SV=1	10.884	17.8484	5	5	5	409	45.5	15.65	5
High	Q96PK6	RNA-binding protein 14 OS=Homo sapiens GN=RBM14 PE=1 SV=2	10.844	8.81913	4	4	4	669	69.4	13.93	4
High	Q5D862	Filaggrin-2 OS=Homo sapiens GN=FLG2 PE=1 SV=1	10.816	3.88959	4	5	4	2391	247.9	18.56	4
High	P23246	Splicing factor, proline- and glutamine-rich OS=Homo sapiens GN=SFPQ PE=1 SV=2	10.749	7.49646	4	4	4	707	76.1	12.44	4
High	P04040	Catalase OS=Homo sapiens GN=CAT PE=1 SV=3	10.68	9.10816	3	4	3	527	59.7	15.49	3
High	Q59EI9	ADP,ATP carrier protein, liver isoform T2 variant (Fragment) OS=Homo sapiens PE=2 SV=1	10.659	18.8854	5	5	2	323	35.4	14.96	5
High	A0A024R6S1	DnaJ (Hsp40) homolog, subfamily A, member 2, isoform CRA_a OS=Homo sapiens GN=DNAJA2 PE=3 SV=1	10.65	14.5631	5	5	5	412	45.7	15.22	5
High	Q05519	Serine/arginine-rich splicing factor 11 OS=Homo sapiens GN=SRSF11 PE=1 SV=1	10.642	12.3967	4	6	4	484	53.5	16.85	4
High	Q04837	Single-stranded DNA-binding protein, mitochondrial OS=Homo sapiens GN=SSBP1 PE=1 SV=1	10.61	46.6216	5	5	5	148	17.2	16.62	5
High	A0A0C4DG17	40S ribosomal protein SA OS=Homo sapiens GN=RPSA PE=1 SV=1	10.589	19	3	3	3	300	33.3	12.5	3
High	B3KQF5	cDNA FLJ90381 fis, clone NT2RP2005035, highly similar to Calumenin OS=Homo sapiens PE=2 SV=1	10.572	10.1587	4	4	4	315	37	14.6	4
High	Q7Z374	Putative uncharacterized protein DKFZp686C02218 (Fragment) OS=Homo sapiens GN=DKFZp686C02218 PE=2 SV=1	10.53	10.3659	4	4	1	492	53.7	13.31	4
High	Q9Y5M8	Signal recognition particle receptor subunit beta OS=Homo sapiens GN=SRPRB PE=1 SV=3	10.42	17.7122	3	3	3	271	29.7	11.77	3
High	P09382	Galectin-1 OS=Homo sapiens GN=LGALS1 PE=1 SV=2	10.409	39.2593	4	4	4	135	14.7	13.04	4
High	Q92900	Regulator of nonsense transcripts 1 OS=Homo sapiens GN=UPF1 PE=1 SV=2	10.407	7.88308	6	7	6	1129	124.3	23.03	6
High	P62263	40S ribosomal protein S14 OS=Homo sapiens GN=RPS14 PE=1 SV=3	10.275	29.8013	4	5	4	151	16.3	18.71	4
High	A0A0S2Z410	Hydroxysteroid dehydrogenase 10 isoform 1 (Fragment) OS=Homo sapiens GN=HSD17B10 PE=2 SV=1	10.195	21.8391	3	4	3	261	26.9	15.57	3
High	E5KNY5	Leucine-rich PPR-motif containing OS=Homo sapiens GN=LRPPRC PE=4 SV=1	10.108	4.23242	5	5	5	1394	157.8	15.55	5
High	F8W1S1	Keratin, type II cytoskeletal 74 OS=Homo sapiens GN=KRT74 PE=1 SV=1	10.048	5.89319	4	6	2	543	59.4	17.99	4
High	J3KQE5	GTP-binding nuclear protein Ran (Fragment) OS=Homo sapiens GN=RAN PE=1 SV=1	9.999	19.2308	4	4	4	234	26.8	11.26	4
High	P62269	40S ribosomal protein S18 OS=Homo sapiens GN=RPS18 PE=1 SV=3	9.888	25.6579	5	6	3	152	17.7	15.74	5
High	B3KT70	cDNA FLJ37767 fis, clone BRHIP2024911, highly similar to Homo sapiens hexokinase domain containing 1 (HKDC1), mRNA OS=Homo sapiens PE=2 SV=1	9.82	8.2879	6	6	6	917	102.5	19.23	6
High	Q53HU8	Vimentin variant (Fragment) OS=Homo sapiens PE=2 SV=1	9.816	12.0172	6	6	6	466	53.7	16.63	6
High	A0A0S2Z4Z6	Serine/arginine repetitive matrix 1 isoform 2 (Fragment) OS=Homo sapiens GN=SRRM1 PE=2 SV=1	9.784	4.13943	3	6	3	918	103.9	22.62	3
High	Q14498	RNA-binding protein 39 OS=Homo sapiens GN=RBM39 PE=1 SV=2	9.741	9.43396	4	4	4	530	59.3	13.3	4
High	Q7L0Y3	Mitochondrial ribonuclease P protein 1 OS=Homo sapiens GN=TRMT10C PE=1 SV=2	9.732	11.4144	4	4	4	403	47.3	12.33	4
High	P51991	Heterogeneous nuclear ribonucleoprotein A3 OS=Homo sapiens GN=HNRNPA3 PE=1 SV=2	9.647	14.0212	3	3	3	378	39.6	10.34	3
High	Q5TDF0	Cancer-related nucleoside-triphosphatase OS=Homo sapiens GN=NTPCR PE=1 SV=1	9.548	30.7018	5	7	5	228	25.1	21.53	5
High	A8K5B6	cDNA FLJ76830, highly similar to Homo sapiens SWI/SNF related, matrix associated, actin dependent regulator of chromatin, subfamily a, member 3 (SMARCA3), transcript variant 1, mRNA OS=Homo sapiens PE=2 SV=1	9.527	4.75719	4	4	4	1009	113.9	11.59	4
High	B2R6X5	cDNA, FLJ93166, highly similar to Homo sapiens heat shock 70kDa protein 6 (HSP70B') (HSPA6), mRNA OS=Homo sapiens PE=2 SV=1	9.507	7.15397	4	6	1	643	70.9	17.95	4
High	O95831	Apoptosis-inducing factor 1, mitochondrial OS=Homo sapiens GN=AIFM1 PE=1 SV=1	9.43	12.2349	5	5	5	613	66.9	18.07	5
High	P46776	60S ribosomal protein L27a OS=Homo sapiens GN=RPL27A PE=1 SV=2	9.407	27.7027	4	4	4	148	16.6	12.67	4
High	P78328	HP47 protein (Fragment) OS=Homo sapiens PE=2 SV=1	9.334	46.1538	3	3	3	78	8.7	10.67	3
High	Q8ND56	Protein LSM14 homolog A OS=Homo sapiens GN=LSM14A PE=1 SV=3	9.293	8.42333	3	3	3	463	50.5	9.98	3
High	A1L020	RNA-binding protein MEX3A OS=Homo sapiens GN=MEX3A PE=1 SV=1	9.195	10.3846	3	3	3	520	54.1	11.52	3
High	O75947	ATP synthase subunit d, mitochondrial OS=Homo sapiens GN=ATP5H PE=1 SV=3	9.153	24.2236	3	3	3	161	18.5	11.03	3
High	V9HVY1	Epididymis secretory sperm binding protein Li 78p OS=Homo sapiens GN=HEL-S-78p PE=2 SV=1	9.125	8.9613	4	5	4	491	55.9	14.87	4
High	P51151	Ras-related protein Rab-9A OS=Homo sapiens GN=RAB9A PE=1 SV=1	9.096	19.403	3	3	3	201	22.8	11.47	3
High	A8K486	Peptidyl-prolyl cis-trans isomerase OS=Homo sapiens PE=2 SV=1	8.98	36.3636	5	5	5	165	18	14.55	5
High	A0A024QZN9	Voltage-dependent anion channel 2, isoform CRA_a OS=Homo sapiens GN=VDAC2 PE=4 SV=1	8.978	16.6144	4	4	4	319	34.5	13.4	4
High	A0A0A0MTS2	Glucose-6-phosphate isomerase (Fragment) OS=Homo sapiens GN=GPI PE=1 SV=1	8.879	8.55148	3	3	3	573	64.8	10.06	3
High	A8K4I8	cDNA FLJ78131, highly similar to Homo sapiens nipsnap homolog 1 (C. elegans) (NIPSNAP1), mRNA OS=Homo sapiens PE=2 SV=1	8.858	16.5493	4	4	4	284	33.2	13.49	4
High	P02545	Prelamin-A/C OS=Homo sapiens GN=LMNA PE=1 SV=1	8.824	10.0904	4	4	4	664	74.1	15.37	4
High	A0A024R4Q8	Ribosomal protein S5, isoform CRA_a OS=Homo sapiens GN=RPS5 PE=3 SV=1	8.794	21.0784	3	3	3	204	22.9	11.66	3
High	A8K588	cDNA FLJ76823, highly similar to Homo sapiens splicing factor, arginine/serine-rich 6 (SFRS6), mRNA OS=Homo sapiens PE=2 SV=1	8.788	11.6279	4	4	2	344	39.5	11.4	4
High	B2R6J2	cDNA, FLJ92973, highly similar to Homo sapiens villin 2 (ezrin) (VIL2), mRNA OS=Homo sapiens PE=2 SV=1	8.782	6.82594	4	5	1	586	69.4	14.53	4
High	Q9NP72	Ras-related protein Rab-18 OS=Homo sapiens GN=RAB18 PE=1 SV=1	8.676	20.8738	4	5	4	206	23	15.66	4
High	P11177	Pyruvate dehydrogenase E1 component subunit beta, mitochondrial OS=Homo sapiens GN=PDHB PE=1 SV=3	8.656	11.1421	3	3	3	359	39.2	9.78	3
High	P26038	Moesin OS=Homo sapiens GN=MSN PE=1 SV=3	8.584	7.45234	4	5	1	577	67.8	14.11	4
High	B2R7W4	cDNA, FLJ93632, highly similar to Homo sapiens heterogeneous nuclear ribonucleoprotein R (HNRPR), mRNA OS=Homo sapiens PE=2 SV=1	8.56	8.21485	5	5	2	633	70.9	15.34	5
High	Q15181	Inorganic pyrophosphatase OS=Homo sapiens GN=PPA1 PE=1 SV=2	8.543	16.955	4	4	4	289	32.6	12.38	4
High	Q9UKK3	Poly [ADP-ribose] polymerase 4 OS=Homo sapiens GN=PARP4 PE=1 SV=3	8.538	2.90023	4	4	4	1724	192.5	12	4
High	Q96P63	Serpin B12 OS=Homo sapiens GN=SERPINB12 PE=1 SV=1	8.491	9.1358	3	3	3	405	46.2	9.97	3
High	P08559	Pyruvate dehydrogenase E1 component subunit alpha, somatic form, mitochondrial OS=Homo sapiens GN=PDHA1 PE=1 SV=3	8.46	8.71795	3	3	3	390	43.3	10.09	3
High	P19338	Nucleolin OS=Homo sapiens GN=NCL PE=1 SV=3	8.416	8.16901	5	5	5	710	76.6	15.52	5
High	Q3KP66	Uncharacterized protein C1orf106 OS=Homo sapiens GN=C1orf106 PE=2 SV=2	8.362	12.5189	4	4	4	663	72.9	15.09	4
High	A0A087WZ40	Ensconsin OS=Homo sapiens GN=MAP7 PE=1 SV=1	8.325	4.87805	3	3	3	779	87.8	10.16	3
High	P62249	40S ribosomal protein S16 OS=Homo sapiens GN=RPS16 PE=1 SV=2	8.323	26.0274	4	5	4	146	16.4	12.77	4
High	A2RRH1	Amine oxidase OS=Homo sapiens GN=IL4I1 PE=2 SV=1	8.31	8.14941	4	4	4	589	65.3	13.1	4
High	B2R4C0	60S ribosomal protein L18a OS=Homo sapiens PE=2 SV=1	8.249	25	4	5	1	176	20.7	13.92	4
High	A8K259	cDNA FLJ78501, highly similar to Homo sapiens serpin peptidase inhibitor, clade H (heat shock protein 47), member 1, (collagen binding protein 1) (SERPINH1), mRNA OS=Homo sapiens PE=2 SV=1	8.224	8.37321	3	3	3	418	46.5	10.35	3
High	Q5T749	Keratinocyte proline-rich protein OS=Homo sapiens GN=KPRP PE=1 SV=1	8.164	8.80829	4	4	4	579	64.1	12.22	4
High	A0A024R8A7	HCG31253, isoform CRA_a OS=Homo sapiens GN=hCG_31253 PE=4 SV=1	8.15	10.1399	3	3	3	572	61.6	11.01	3
High	A8K9U0	cDNA FLJ78260, highly similar to Homo sapiens RNA binding motif protein 4, mRNA OS=Homo sapiens PE=2 SV=1	8.117	12.0879	2	2	2	364	40.3	8.5	2
High	Q1KMD3	Heterogeneous nuclear ribonucleoprotein U-like protein 2 OS=Homo sapiens GN=HNRNPUL2 PE=1 SV=1	8.102	5.35475	3	3	3	747	85.1	9.22	3
High	A8K644	Splicing factor, arginine/serine-rich 4, isoform CRA_b OS=Homo sapiens GN=SFRS4 PE=2 SV=1	8.1	9.10931	4	4	2	494	56.7	12.79	4
High	P61513	60S ribosomal protein L37a OS=Homo sapiens GN=RPL37A PE=1 SV=2	8.005	41.3043	3	4	3	92	10.3	13.7	3
High	A0A024R3E3	Apolipoprotein A-I, isoform CRA_a OS=Homo sapiens GN=APOA1 PE=3 SV=1	8	19.1011	5	5	5	267	30.8	13.46	5
High	A0A024R3W7	Eukaryotic translation elongation factor 1 beta 2, isoform CRA_a OS=Homo sapiens GN=EEF1B2 PE=3 SV=1	7.962	16.4444	3	3	3	225	24.7	11.01	3
High	Q8N684	Cleavage and polyadenylation specificity factor subunit 7 OS=Homo sapiens GN=CPSF7 PE=1 SV=1	7.846	7.431	3	3	3	471	52	9.89	3
High	E9PAU2	Ribonucleoprotein PTB-binding 1 OS=Homo sapiens GN=RAVER1 PE=1 SV=1	7.813	8.73016	3	3	3	756	79.5	14.04	3
High	P62277	40S ribosomal protein S13 OS=Homo sapiens GN=RPS13 PE=1 SV=2	7.768	25.1656	4	5	4	151	17.2	16.33	4
High	A2A3R6	40S ribosomal protein S6 OS=Homo sapiens GN=RPS6 PE=2 SV=1	7.708	15.6627	3	3	3	249	28.7	11.29	3
High	Q9NSI2	Protein FAM207A OS=Homo sapiens GN=FAM207A PE=1 SV=2	7.708	30	4	4	4	230	25.4	12.75	4
High	V9HWC7	Epididymis secretory sperm binding protein Li 128m OS=Homo sapiens GN=HEL-S-128m PE=2 SV=1	7.705	21.875	4	5	4	224	25	15.28	4
High	Q14684	Ribosomal RNA processing protein 1 homolog B OS=Homo sapiens GN=RRP1B PE=1 SV=3	7.701	3.82586	2	2	2	758	84.4	8.39	2
High	P08243	Asparagine synthetase [glutamine-hydrolyzing] OS=Homo sapiens GN=ASNS PE=1 SV=4	7.69	8.02139	4	6	4	561	64.3	18.55	4
High	P61604	10 kDa heat shock protein, mitochondrial OS=Homo sapiens GN=HSPE1 PE=1 SV=2	7.66	35.2941	3	3	3	102	10.9	9.76	3
High	A0A024R8S5	Protein disulfide-isomerase OS=Homo sapiens GN=P4HB PE=2 SV=1	7.603	10.4331	5	5	5	508	57.1	14.33	5
High	B2R8R5	cDNA, FLJ94025, highly similar to Homo sapiens tripartite motif-containing 28 (TRIM28), mRNA OS=Homo sapiens PE=2 SV=1	7.598	6.46707	3	3	3	835	88.5	10.16	3
High	Q13344	Fus-like protein (Fragment) OS=Homo sapiens PE=2 SV=1	7.573	11.1742	5	6	5	528	53.3	19.35	5
High	O00217	NADH dehydrogenase [ubiquinone] iron-sulfur protein 8, mitochondrial OS=Homo sapiens GN=NDUFS8 PE=1 SV=1	7.563	19.5238	3	3	3	210	23.7	10.84	3
High	Q13242	Serine/arginine-rich splicing factor 9 OS=Homo sapiens GN=SRSF9 PE=1 SV=1	7.479	22.1719	4	4	4	221	25.5	13.74	4
High	A0A024R814	Ribosomal protein L7, isoform CRA_a OS=Homo sapiens GN=RPL7 PE=4 SV=1	7.459	14.6718	4	4	4	259	30.4	10.58	4
High	D7PBN3	ESRP1/RAF1 fusion protein OS=Homo sapiens PE=2 SV=1	7.454	3.58153	3	3	2	1061	118.5	9.62	3
High	Q15084	Protein disulfide-isomerase A6 OS=Homo sapiens GN=PDIA6 PE=1 SV=1	7.453	10.4545	3	3	3	440	48.1	10.12	3
High	Q06210	Glutamine--fructose-6-phosphate aminotransferase [isomerizing] 1 OS=Homo sapiens GN=GFPT1 PE=1 SV=3	7.446	8.01144	4	4	4	699	78.8	13.46	4
High	P15531	Nucleoside diphosphate kinase A OS=Homo sapiens GN=NME1 PE=1 SV=1	7.441	19.0789	2	3	2	152	17.1	11.39	2
High	P16402	Histone H1.3 OS=Homo sapiens GN=HIST1H1D PE=1 SV=2	7.423	14.9321	4	4	4	221	22.3	14.24	4
High	Q59GE4	Ribosomal protein S10 variant (Fragment) OS=Homo sapiens PE=4 SV=1	7.331	13.7931	3	3	3	174	19.8	10.85	3
High	B4DJ30	cDNA FLJ61290, highly similar to Neutral alpha-glucosidase AB OS=Homo sapiens PE=2 SV=1	7.324	6.33166	4	4	4	995	112.9	9.87	4
High	Q13838	Spliceosome RNA helicase DDX39B OS=Homo sapiens GN=DDX39B PE=1 SV=1	7.312	10.514	4	5	4	428	49	14.79	4
High	Q59ER5	WD repeat-containing protein 1 isoform 1 variant (Fragment) OS=Homo sapiens PE=2 SV=1	7.31	8.97436	4	4	4	624	68.1	11.21	4
High	Q9NX20	39S ribosomal protein L16, mitochondrial OS=Homo sapiens GN=MRPL16 PE=1 SV=1	7.308	14.741	3	3	3	251	28.4	9.83	3
High	Q4VXU2	Polyadenylate-binding protein 1-like OS=Homo sapiens GN=PABPC1L PE=2 SV=1	7.299	6.18893	3	4	1	614	68.3	13.29	3
High	Q504R6	RAB13 protein (Fragment) OS=Homo sapiens GN=RAB13 PE=2 SV=1	7.267	13.5246	2	2	2	244	27.2	7.29	2
High	P48735	Isocitrate dehydrogenase [NADP], mitochondrial OS=Homo sapiens GN=IDH2 PE=1 SV=2	7.257	8.18584	3	3	3	452	50.9	9.92	3
High	Q53HD3	Ribosomal protein L18a variant (Fragment) OS=Homo sapiens PE=2 SV=1	7.239	25	4	5	1	176	20.7	13.47	4
High	E9PK25	Cofilin-1 OS=Homo sapiens GN=CFL1 PE=1 SV=1	7.233	19.1176	3	3	3	204	22.7	11.91	3
High	P19013	Keratin, type II cytoskeletal 4 OS=Homo sapiens GN=KRT4 PE=1 SV=4	7.147	7.30337	4	9	1	534	57.3	28.54	4
High	E5KND5	Elongation factor G, mitochondrial OS=Homo sapiens GN=GFM1 PE=2 SV=1	7.142	4.79361	3	3	3	751	83.4	8.48	3
High	Q96AG4	Leucine-rich repeat-containing protein 59 OS=Homo sapiens GN=LRRC59 PE=1 SV=1	7.139	16.6124	4	4	4	307	34.9	11.12	4
High	Q9Y4G6	Talin-2 OS=Homo sapiens GN=TLN2 PE=1 SV=4	7.051	0.944138	2	2	2	2542	271.4	8.37	2
High	Q7Z351	Putative uncharacterized protein DKFZp686N02209 OS=Homo sapiens GN=DKFZp686N02209 PE=2 SV=1	7.05	9.75104	3	3	3	482	52.8	11.03	3
High	A0A024R8P8	Ribosomal protein L38, isoform CRA_a OS=Homo sapiens GN=RPL38 PE=3 SV=1	7.032	52.8571	4	8	4	70	8.2	25.88	4
High	B7Z6Z4	Myosin light polypeptide 6 OS=Homo sapiens GN=MYL6 PE=1 SV=1	7.022	13.8655	3	4	3	238	26.7	12.62	3
High	Q8NBS9	Thioredoxin domain-containing protein 5 OS=Homo sapiens GN=TXNDC5 PE=1 SV=2	6.973	10.8796	3	3	3	432	47.6	10.31	3
High	B5BU38	Annexin OS=Homo sapiens GN=ANXA1 PE=2 SV=1	6.934	10.9827	2	2	2	346	38.7	8.91	2
High	Q92615	La-related protein 4B OS=Homo sapiens GN=LARP4B PE=1 SV=3	6.922	5.01355	3	3	3	738	80.5	8.26	3
High	Q99755	Phosphatidylinositol 4-phosphate 5-kinase type-1 alpha OS=Homo sapiens GN=PIP5K1A PE=1 SV=1	6.918	5.87189	3	3	3	562	62.6	8.86	3
High	A0A1B4Z394	Tubulin gamma chain OS=Homo sapiens GN=TUBG2 PE=2 SV=1	6.862	9.13043	3	3	3	460	52.1	8.19	3
High	Q8NB90	Spermatogenesis-associated protein 5 OS=Homo sapiens GN=SPATA5 PE=1 SV=3	6.857	4.25532	3	4	2	893	97.8	12.44	3
High	A0A0A0MQX8	Muscleblind-like protein 1 OS=Homo sapiens GN=MBNL1 PE=1 SV=1	6.856	11	3	3	3	400	43	10.83	3
High	P62906	60S ribosomal protein L10a OS=Homo sapiens GN=RPL10A PE=1 SV=2	6.85	19.3548	4	4	4	217	24.8	10.69	4
High	F4ZW66	NF110b OS=Homo sapiens PE=2 SV=1	6.836	4.34298	3	3	3	898	95.7	9.34	3
High	V9HWI3	Cathepsin D (Lysosomal aspartyl peptidase), isoform CRA_a OS=Homo sapiens GN=HEL-S-130P PE=2 SV=1	6.815	9.2233	4	4	4	412	44.5	10.91	4
High	B4DWA7	Serine hydroxymethyltransferase OS=Homo sapiens PE=2 SV=1	6.778	4.87329	2	2	2	513	56.3	8.06	2
High	P62888	60S ribosomal protein L30 OS=Homo sapiens GN=RPL30 PE=1 SV=2	6.775	40.8696	3	3	3	115	12.8	10.61	3
High	O00257	E3 SUMO-protein ligase CBX4 OS=Homo sapiens GN=CBX4 PE=1 SV=3	6.769	10	3	3	3	560	61.3	12.53	3
High	Q15434	RNA-binding motif, single-stranded-interacting protein 2 OS=Homo sapiens GN=RBMS2 PE=1 SV=1	6.763	11.7936	3	3	3	407	43.9	10.29	3
High	A4QPB0	IQ motif containing GTPase activating protein 1 OS=Homo sapiens GN=IQGAP1 PE=1 SV=1	6.761	1.99155	3	3	3	1657	189.2	7.25	3
High	Q9Y4L1	Hypoxia up-regulated protein 1 OS=Homo sapiens GN=HYOU1 PE=1 SV=1	6.749	5.40541	4	5	4	999	111.3	16.89	4
High	Q9Y383	Putative RNA-binding protein Luc7-like 2 OS=Homo sapiens GN=LUC7L2 PE=1 SV=2	6.726	9.94898	3	3	3	392	46.5	9.59	3
High	Q9NR12	PDZ and LIM domain protein 7 OS=Homo sapiens GN=PDLIM7 PE=1 SV=1	6.703	7.43982	3	3	3	457	49.8	9.23	3
High	A0A0S2Z4B3	RNA binding motif single stranded interacting protein 1 isoform 2 (Fragment) OS=Homo sapiens GN=RBMS1 PE=2 SV=1	6.684	7.12589	2	3	2	421	46.2	12.13	2
High	A0A024RBE7	Thymopoietin, isoform CRA_c OS=Homo sapiens GN=TMPO PE=4 SV=1	6.663	12.7753	3	3	3	454	50.6	11.38	3
High	A8K005	cDNA FLJ77896, highly similar to Homo sapiens Ras homolog enriched in brain (RHEB), mRNA OS=Homo sapiens PE=2 SV=1	6.659	14.6739	2	2	2	184	20.5	7.14	2
High	Q59FI9	Ribosomal protein L12 variant (Fragment) OS=Homo sapiens PE=2 SV=1	6.629	16.7513	3	3	3	197	21.5	9.41	3
High	A0A024RB87	RAP1B, member of RAS oncogene family, isoform CRA_a OS=Homo sapiens GN=RAP1B PE=4 SV=1	6.581	21.1957	3	3	3	184	20.8	9.81	3
High	P23284	Peptidyl-prolyl cis-trans isomerase B OS=Homo sapiens GN=PPIB PE=1 SV=2	6.564	24.0741	5	5	5	216	23.7	13.58	5
High	A2A274	Aconitate hydratase, mitochondrial OS=Homo sapiens GN=ACO2 PE=1 SV=1	6.542	4.84472	3	4	3	805	87.8	12.57	3
High	Q16629	Serine/arginine-rich splicing factor 7 OS=Homo sapiens GN=SRSF7 PE=1 SV=1	6.464	16.8067	4	4	3	238	27.4	11.78	4
High	Q13835	Plakophilin-1 OS=Homo sapiens GN=PKP1 PE=1 SV=2	6.451	3.48059	2	2	2	747	82.8	8.24	2
High	A0A024R6W0	Aspartate aminotransferase OS=Homo sapiens GN=GOT2 PE=4 SV=1	6.401	8.13953	3	3	3	430	47.4	11.04	3
High	B2R5M8	Isocitrate dehydrogenase [NADP] OS=Homo sapiens PE=2 SV=1	6.339	6.03865	2	2	2	414	46.6	6.32	2
High	A8K5K0	cDNA FLJ78309, highly similar to Homo sapiens heterogeneous nuclear ribonucleoprotein U-like 1 (HNRPUL1), transcript variant 1, mRNA OS=Homo sapiens PE=2 SV=1	6.298	3.50467	2	2	2	856	95.6	6.75	2
High	P00387	NADH-cytochrome b5 reductase 3 OS=Homo sapiens GN=CYB5R3 PE=1 SV=3	6.277	11.9601	2	3	2	301	34.2	12.96	2
High	J3KQN4	60S ribosomal protein L36a OS=Homo sapiens GN=RPL36A PE=3 SV=1	6.272	28.169	4	4	1	142	16.4	10.81	4
High	P52701	DNA mismatch repair protein Msh6 OS=Homo sapiens GN=MSH6 PE=1 SV=2	6.271	2.86765	3	3	3	1360	152.7	9.99	3
High	Q5T0F3	Guanine nucleotide binding protein-like 2 (Nucleolar) OS=Homo sapiens GN=GNL2 PE=2 SV=1	6.268	4.24077	2	2	2	731	83.6	7.1	2
High	Q8N1N4	Keratin, type II cytoskeletal 78 OS=Homo sapiens GN=KRT78 PE=2 SV=2	6.263	6.15385	3	4	3	520	56.8	13.18	3
High	Q14525	Keratin, type I cuticular Ha3-II OS=Homo sapiens GN=KRT33B PE=1 SV=3	6.254	6.93069	3	5	2	404	46.2	13.44	3
High	P60866	40S ribosomal protein S20 OS=Homo sapiens GN=RPS20 PE=1 SV=1	6.249	19.3277	2	3	2	119	13.4	9.18	2
High	Q13435	Splicing factor 3B subunit 2 OS=Homo sapiens GN=SF3B2 PE=1 SV=2	6.237	2.7933	2	2	2	895	100.2	7.21	2
High	Q6KB66	Keratin, type II cytoskeletal 80 OS=Homo sapiens GN=KRT80 PE=1 SV=2	6.221	5.0885	2	6	1	452	50.5	21.45	2
High	Q59F99	Staufen isoform b variant (Fragment) OS=Homo sapiens PE=2 SV=1	6.204	6.42978	2	2	2	591	64.7	8.09	2
High	A0A0U1RRH7	Histone H2A OS=Homo sapiens PE=3 SV=1	6.204	20.5882	3	3	3	170	18.5	9.95	3
High	P07741	Adenine phosphoribosyltransferase OS=Homo sapiens GN=APRT PE=1 SV=2	6.19	21.6667	3	3	3	180	19.6	6.12	3
High	A0A0U4BW16	Non-muscle myosin heavy chain 9 OS=Homo sapiens GN=MYH9 PE=2 SV=1	6.189	1.57922	2	2	2	1963	226.4	8.59	2
High	P02671	Fibrinogen alpha chain OS=Homo sapiens GN=FGA PE=1 SV=2	6.185	4.15704	3	3	3	866	94.9	8.17	3
High	Q13151	Heterogeneous nuclear ribonucleoprotein A0 OS=Homo sapiens GN=HNRNPA0 PE=1 SV=1	6.182	11.8033	2	3	2	305	30.8	11.75	2
High	Q16881	Thioredoxin reductase 1, cytoplasmic OS=Homo sapiens GN=TXNRD1 PE=1 SV=3	6.168	5.39291	2	2	2	649	70.9	8.96	2
High	Q53HV2	Chaperonin containing TCP1, subunit 7 (Eta) variant (Fragment) OS=Homo sapiens PE=2 SV=1	6.142	4.41989	2	2	2	543	59.3	7.71	2
High	P37802	Transgelin-2 OS=Homo sapiens GN=TAGLN2 PE=1 SV=3	6.141	15.5779	3	3	3	199	22.4	9.39	3
High	E9PRY8	Elongation factor 1-delta OS=Homo sapiens GN=EEF1D PE=1 SV=1	6.137	6.59971	4	4	4	697	76.5	12.27	4
High	A8K228	cDNA FLJ77874, highly similar to Homo sapiens glycine C-acetyltransferase (2-amino-3-ketobutyrate coenzyme A ligase), mRNA OS=Homo sapiens PE=2 SV=1	6.106	9.06921	2	2	2	419	45.2	9.16	2
High	B2RXJ1	FAM133B protein OS=Homo sapiens GN=FAM133B PE=2 SV=1	6.074	8.50202	2	3	2	247	28.3	9.14	2
High	A0A024R8W0	DEAD (Asp-Glu-Ala-Asp) box polypeptide 48, isoform CRA_a OS=Homo sapiens GN=DDX48 PE=3 SV=1	6.074	6.08273	2	2	1	411	46.8	7.43	2
High	Q8TAE8	Growth arrest and DNA damage-inducible proteins-interacting protein 1 OS=Homo sapiens GN=GADD45GIP1 PE=1 SV=1	6.052	12.1622	2	2	2	222	25.4	7.2	2
High	P99999	Cytochrome c OS=Homo sapiens GN=CYCS PE=1 SV=2	6.031	30.4762	3	3	3	105	11.7	8.27	3
High	A0A024RDS1	Heat shock 105kDa/110kDa protein 1, isoform CRA_c OS=Homo sapiens GN=HSPH1 PE=3 SV=1	6.002	3.37995	2	2	1	858	96.8	8.14	2
High	P36542	ATP synthase subunit gamma, mitochondrial OS=Homo sapiens GN=ATP5C1 PE=1 SV=1	5.995	13.0872	4	4	4	298	33	9.57	4
High	Q96PU8	Protein quaking OS=Homo sapiens GN=QKI PE=1 SV=1	5.984	13.783	3	3	3	341	37.6	9.82	3
High	A0A0C4DG89	Probable ATP-dependent RNA helicase DDX46 OS=Homo sapiens GN=DDX46 PE=1 SV=1	5.976	3.19767	3	3	3	1032	117.4	9.67	3
High	Q59FF0	EBNA-2 co-activator variant (Fragment) OS=Homo sapiens PE=2 SV=1	5.976	3.52697	3	3	3	964	107.4	8.34	3
High	Q5BKZ1	DBIRD complex subunit ZNF326 OS=Homo sapiens GN=ZNF326 PE=1 SV=2	5.968	4.98282	2	2	2	582	65.6	8.74	2
High	Q92520	Protein FAM3C OS=Homo sapiens GN=FAM3C PE=1 SV=1	5.952	14.978	3	3	3	227	24.7	8.68	3
High	Q4LE64	NUMA1 variant protein (Fragment) OS=Homo sapiens GN=NUMA1 variant protein PE=2 SV=1	5.941	2.40453	3	3	3	2121	238.7	11.03	3
High	A0A087WTP3	Far upstream element-binding protein 2 OS=Homo sapiens GN=KHSRP PE=1 SV=1	5.916	3.65682	2	2	2	711	73	7.38	2
High	P04181	Ornithine aminotransferase, mitochondrial OS=Homo sapiens GN=OAT PE=1 SV=1	5.893	8.42825	3	3	3	439	48.5	9.3	3
High	Q53G26	DnaJ (Hsp40) homolog, subfamily A, member 3 variant (Fragment) OS=Homo sapiens GN=DNAJA3 PE=1 SV=1	5.888	12.9167	4	4	4	480	52.5	11.33	4
High	B2R4M6	Protein S100 OS=Homo sapiens PE=2 SV=1	5.886	24.5614	2	3	2	114	13.2	10.08	2
High	A0A096LPI6	Uncharacterized protein (Fragment) OS=Homo sapiens PE=4 SV=2	5.876	8.96057	1	1	1	279	30.5	5.41	1
High	A0A090KM67	HLA class I antigen OS=Homo sapiens GN=HLA-C PE=3 SV=1	5.858	7.10383	2	2	2	366	40.9	6.27	2
High	A8K517	Ribosomal protein S23, isoform CRA_a OS=Homo sapiens GN=RPS23 PE=2 SV=1	5.822	20.979	3	5	3	143	15.8	14.52	3
High	Q969Q0	60S ribosomal protein L36a-like OS=Homo sapiens GN=RPL36AL PE=1 SV=3	5.819	37.7358	4	4	1	106	12.5	10.82	4
High	P21291	Cysteine and glycine-rich protein 1 OS=Homo sapiens GN=CSRP1 PE=1 SV=3	5.746	19.171	2	3	2	193	20.6	11.53	2
High	A0A024RDR0	High-mobility group box 1, isoform CRA_a OS=Homo sapiens GN=HMGB1 PE=4 SV=1	5.742	14.4186	2	3	2	215	24.9	11.94	2
High	Q8WUD1	Ras-related protein Rab-2B OS=Homo sapiens GN=RAB2B PE=1 SV=1	5.714	12.037	2	2	2	216	24.2	8.84	2
High	Q14764	Major vault protein OS=Homo sapiens GN=MVP PE=1 SV=4	5.709	5.15118	3	3	3	893	99.3	9.81	3
High	P31689	DnaJ homolog subfamily A member 1 OS=Homo sapiens GN=DNAJA1 PE=1 SV=2	5.686	6.54912	2	2	2	397	44.8	7.99	2
High	B2RDQ3	cDNA, FLJ96718, highly similar to Homo sapiens splicing factor, arginine/serine-rich 10 (transformer 2 homolog, Drosophila) (SFRS10), mRNA OS=Homo sapiens PE=2 SV=1	5.685	10.4167	2	2	2	288	33.7	7.67	2
High	P62854	40S ribosomal protein S26 OS=Homo sapiens GN=RPS26 PE=1 SV=3	5.678	18.2609	2	3	2	115	13	8.6	2
High	P08134	Rho-related GTP-binding protein RhoC OS=Homo sapiens GN=RHOC PE=1 SV=1	5.671	13.4715	2	2	2	193	22	8.33	2
High	P52943	Cysteine-rich protein 2 OS=Homo sapiens GN=CRIP2 PE=1 SV=1	5.639	22.1154	2	2	2	208	22.5	8.91	2
High	Q15366	Poly(rC)-binding protein 2 OS=Homo sapiens GN=PCBP2 PE=1 SV=1	5.59	12.0548	3	3	1	365	38.6	10.73	3
High	A8K900	Mitochondrial GTPase 1 OS=Homo sapiens PE=1 SV=1	5.581	15	3	3	3	300	33.3	8.87	3
High	B5BU08	U2 small nuclear RNA auxillary factor 1 isoform a OS=Homo sapiens GN=U2AF1 PE=2 SV=1	5.57	11.6667	2	2	2	240	27.9	7.16	2
High	O15371	Eukaryotic translation initiation factor 3 subunit D OS=Homo sapiens GN=EIF3D PE=1 SV=1	5.566	4.74453	2	2	2	548	63.9	7.36	2
High	Q6IPI1	Ribosomal protein L29 OS=Homo sapiens GN=RPL29 PE=2 SV=1	5.543	9.31677	1	1	1	161	17.9	4.11	1
High	G3V2S9	SRA stem-loop-interacting RNA-binding protein, mitochondrial OS=Homo sapiens GN=SLIRP PE=1 SV=1	5.538	28.2258	3	4	3	124	13.9	12.71	3
High	H0YKD8	60S ribosomal protein L28 OS=Homo sapiens GN=RPL28 PE=1 SV=1	5.514	15.2941	3	3	3	170	19.1	8.15	3
High	O43823	A-kinase anchor protein 8 OS=Homo sapiens GN=AKAP8 PE=1 SV=1	5.491	3.03468	2	3	2	692	76.1	8.38	2
High	Q8IWC1	MAP7 domain-containing protein 3 OS=Homo sapiens GN=MAP7D3 PE=1 SV=2	5.491	3.3105	2	2	2	876	98.4	7.24	2
High	P41250	Glycine--tRNA ligase OS=Homo sapiens GN=GARS PE=1 SV=3	5.481	4.05954	2	2	2	739	83.1	6.84	2
High	O43920	NADH dehydrogenase [ubiquinone] iron-sulfur protein 5 OS=Homo sapiens GN=NDUFS5 PE=1 SV=3	5.432	20.7547	2	2	2	106	12.5	6.45	2
High	Q01844	RNA-binding protein EWS OS=Homo sapiens GN=EWSR1 PE=1 SV=1	5.423	6.55488	2	2	2	656	68.4	4.93	2
High	Q09472	Histone acetyltransferase p300 OS=Homo sapiens GN=EP300 PE=1 SV=2	5.411	3.39685	3	3	3	2414	264	11.99	3
High	C7DJS2	Glutathione S-transferase pi (Fragment) OS=Homo sapiens GN=GSTP1 PE=2 SV=1	5.387	21.8543	2	3	1	151	16.7	12.89	2
High	B2R6F3	Splicing factor arginine/serine-rich 3 OS=Homo sapiens GN=SFRS3 PE=2 SV=1	5.379	24.3902	4	4	3	164	19.3	12.27	4
High	P05089	Arginase-1 OS=Homo sapiens GN=ARG1 PE=1 SV=2	5.377	9.31677	2	2	2	322	34.7	7.03	2
High	B2R739	cDNA, FLJ93269, highly similar to Homo sapiens mitochondrial ribosomal protein L15 (MRPL15), nuclear gene encoding mitochondrial protein, mRNA OS=Homo sapiens PE=2 SV=1	5.357	9.7973	2	2	2	296	33.4	7.49	2
High	O75152	Zinc finger CCCH domain-containing protein 11A OS=Homo sapiens GN=ZC3H11A PE=1 SV=3	5.343	5.67901	2	2	2	810	89.1	6.97	2
High	Q9Y446	Plakophilin-3 OS=Homo sapiens GN=PKP3 PE=1 SV=1	5.338	4.01506	2	2	2	797	87	7.24	2
High	Q96T37	Putative RNA-binding protein 15 OS=Homo sapiens GN=RBM15 PE=1 SV=2	5.334	4.40123	3	3	3	977	107.1	9.35	3
High	P00738	Haptoglobin OS=Homo sapiens GN=HP PE=1 SV=1	5.313	5.91133	3	3	3	406	45.2	8.65	3
High	Q70EL1	Inactive ubiquitin carboxyl-terminal hydrolase 54 OS=Homo sapiens GN=USP54 PE=1 SV=4	5.296	1.90024	2	2	2	1684	187.3	7.36	2
High	Q5SSJ5	Heterochromatin protein 1-binding protein 3 OS=Homo sapiens GN=HP1BP3 PE=1 SV=1	5.286	4.33996	2	2	2	553	61.2	7.22	2
High	Q9BXP5	Serrate RNA effector molecule homolog OS=Homo sapiens GN=SRRT PE=1 SV=1	5.266	3.76712	3	3	3	876	100.6	9.61	3
High	Q5U0I6	H.sapiens ras-related Hrab1A protein OS=Homo sapiens GN=RAB1A PE=2 SV=1	5.255	14.6341	2	2	2	205	22.7	6.24	2
High	P54136	Arginine--tRNA ligase, cytoplasmic OS=Homo sapiens GN=RARS PE=1 SV=2	5.245	6.66667	3	3	3	660	75.3	8.39	3
High	P30040	Endoplasmic reticulum resident protein 29 OS=Homo sapiens GN=ERP29 PE=1 SV=4	5.239	9.57854	2	2	2	261	29	6.28	2
High	A4D2P0	Ras-related C3 botulinum toxin substrate 1 (Rho family, small GTP binding protein Rac1) OS=Homo sapiens GN=RAC1 PE=2 SV=1	5.235	11.3744	2	2	2	211	23.5	6.81	2
High	A0A075B716	40S ribosomal protein S17 OS=Homo sapiens GN=RPS17 PE=1 SV=1	5.228	10.9948	2	2	2	191	21.6	6.58	2
High	Q86SQ0	Pleckstrin homology-like domain family B member 2 OS=Homo sapiens GN=PHLDB2 PE=1 SV=2	5.197	3.751	2	2	2	1253	142.1	6.95	2
High	Q9Y295	Developmentally-regulated GTP-binding protein 1 OS=Homo sapiens GN=DRG1 PE=1 SV=1	5.172	7.35695	2	2	2	367	40.5	8.08	2
High	Q53ET0	CREB-regulated transcription coactivator 2 OS=Homo sapiens GN=CRTC2 PE=1 SV=2	5.17	6.06061	2	2	2	693	73.3	9.45	2
High	Q66PJ3	ADP-ribosylation factor-like protein 6-interacting protein 4 OS=Homo sapiens GN=ARL6IP4 PE=1 SV=2	5.156	6.65083	2	2	2	421	44.9	5.98	2
High	P63104	14-3-3 protein zeta/delta OS=Homo sapiens GN=YWHAZ PE=1 SV=1	5.154	10.6122	2	2	1	245	27.7	6.59	2
High	A8K521	DNA helicase OS=Homo sapiens PE=2 SV=1	5.12	4.90463	3	3	3	734	82.2	8.96	3
High	A0A0S2Z4J1	Hydroxysteroid (17-beta) dehydrogenase 4, isoform CRA_b (Fragment) OS=Homo sapiens GN=HSD17B4 PE=2 SV=1	5.11	5.43478	3	3	3	736	79.6	10.54	3
High	Q02338	D-beta-hydroxybutyrate dehydrogenase, mitochondrial OS=Homo sapiens GN=BDH1 PE=1 SV=3	5.085	9.91254	3	3	3	343	38.1	7.42	3
High	A0A024R2K1	RAB5A, member RAS oncogene family, isoform CRA_a OS=Homo sapiens GN=RAB5A PE=4 SV=1	5.084	11.6279	2	2	1	215	23.6	7.18	2
High	H0Y449	Nuclease-sensitive element-binding protein 1 (Fragment) OS=Homo sapiens GN=YBX1 PE=1 SV=1	5.07	13.1016	2	2	2	374	42	6.81	2
High	P23526	Adenosylhomocysteinase OS=Homo sapiens GN=AHCY PE=1 SV=4	5.058	7.87037	3	3	3	432	47.7	8.04	3
High	J3KTL2	Serine/arginine-rich-splicing factor 1 OS=Homo sapiens GN=SRSF1 PE=1 SV=1	5.049	11.4625	3	3	3	253	28.3	6.09	3
High	H0Y368	Dolichol-phosphate mannosyltransferase subunit 1 (Fragment) OS=Homo sapiens GN=DPM1 PE=1 SV=1	5.042	9.15254	2	2	2	295	33.3	8.82	2
High	A0A087X2I1	26S protease regulatory subunit 10B OS=Homo sapiens GN=PSMC6 PE=1 SV=1	5.017	7.44417	2	2	2	403	45.8	7.06	2
High	V9HWK2	Epididymis luminal protein 114 OS=Homo sapiens GN=HEL114 PE=2 SV=1	4.964	3.26279	3	3	3	1134	123.7	9.64	3
High	A0A0G2JQH2	40S ribosomal protein S18 OS=Homo sapiens GN=RPS18 PE=1 SV=1	4.963	69.697	3	3	1	33	3.8	8.25	3
High	Q9Y3U8	60S ribosomal protein L36 OS=Homo sapiens GN=RPL36 PE=1 SV=3	4.931	20	2	2	2	105	12.2	6.11	2
High	Q5U0D2	Transgelin OS=Homo sapiens GN=TAGLN PE=2 SV=1	4.926	12.4378	2	2	2	201	22.6	6.82	2
High	P49915	GMP synthase [glutamine-hydrolyzing] OS=Homo sapiens GN=GMPS PE=1 SV=1	4.926	6.06061	3	3	3	693	76.7	6.96	3
High	O75396	Vesicle-trafficking protein SEC22b OS=Homo sapiens GN=SEC22B PE=1 SV=4	4.922	12.093	2	2	2	215	24.6	7.95	2
High	P62917	60S ribosomal protein L8 OS=Homo sapiens GN=RPL8 PE=1 SV=2	4.916	15.9533	2	3	2	257	28	11.72	2
High	A0A087WXF8	Nucleolar protein of 40 kDa OS=Homo sapiens GN=ZCCHC17 PE=1 SV=1	4.913	12.1673	3	3	3	263	29.6	7.29	3
High	P55084	Trifunctional enzyme subunit beta, mitochondrial OS=Homo sapiens GN=HADHB PE=1 SV=3	4.905	6.96203	3	3	3	474	51.3	8.98	3
High	Q9NSB2	Keratin, type II cuticular Hb4 OS=Homo sapiens GN=KRT84 PE=2 SV=2	4.901	6.5	4	5	2	600	64.8	14.11	4
High	Q9BVP2	Guanine nucleotide-binding protein-like 3 OS=Homo sapiens GN=GNL3 PE=1 SV=2	4.895	4.18944	2	2	2	549	62	7.38	2
High	P05091	Aldehyde dehydrogenase, mitochondrial OS=Homo sapiens GN=ALDH2 PE=1 SV=2	4.882	4.44874	2	2	1	517	56.3	6.24	2
High	B2RBR9	cDNA, FLJ95650, highly similar to Homo sapiens karyopherin (importin) beta 1 (KPNB1), mRNA OS=Homo sapiens PE=2 SV=1	4.866	1.71233	1	1	1	876	97.1	5.07	1
High	Q9Y2W1	Thyroid hormone receptor-associated protein 3 OS=Homo sapiens GN=THRAP3 PE=1 SV=2	4.854	4.08377	3	3	3	955	108.6	8.54	3
High	P13804	Electron transfer flavoprotein subunit alpha, mitochondrial OS=Homo sapiens GN=ETFA PE=1 SV=1	4.826	13.2132	3	3	3	333	35.1	9.32	3
High	B3KUY2	Prostaglandin E synthase 3 (Cytosolic), isoform CRA_c OS=Homo sapiens GN=PTGES3 PE=2 SV=1	4.811	13.9394	2	2	2	165	19.4	7.04	2
High	B4DEA8	cDNA FLJ56425, highly similar to Very-long-chain specific acyl-CoAdehydrogenase, mitochondrial (EC 1.3.99.-) OS=Homo sapiens PE=2 SV=1	4.806	3.70899	2	2	2	701	75.2	6.94	2
High	B4DJQ5	cDNA FLJ59211, highly similar to Glucosidase 2 subunit beta OS=Homo sapiens PE=2 SV=1	4.789	4.29907	2	2	2	535	60.1	5.18	2
High	Q16658	Fascin OS=Homo sapiens GN=FSCN1 PE=1 SV=3	4.783	5.27383	2	2	2	493	54.5	6.19	2
High	B3KXM2	Serine/threonine-protein phosphatase OS=Homo sapiens PE=2 SV=1	4.766	4.60048	1	1	1	413	45.8	4.56	1
High	A0A140VJY2	Testicular tissue protein Li 209 OS=Homo sapiens PE=2 SV=1	4.752	3.97727	2	2	1	704	80.1	6.98	2
High	B3KTJ9	cDNA FLJ38393 fis, clone FEBRA2007212 OS=Homo sapiens PE=2 SV=1	4.746	3.25027	2	2	2	923	102.9	6.04	2
High	Q96S55	ATPase WRNIP1 OS=Homo sapiens GN=WRNIP1 PE=1 SV=2	4.712	4.21053	3	4	3	665	72.1	7.18	3
High	B5BUB1	RuvB-like helicase (Fragment) OS=Homo sapiens GN=RUVBL1 PE=2 SV=1	4.704	5.48246	2	2	2	456	50.2	7.7	2
High	P14550	Alcohol dehydrogenase [NADP(+)] OS=Homo sapiens GN=AKR1A1 PE=1 SV=3	4.687	3.07692	1	2	1	325	36.6	6.11	1
High	B4DQK8	cDNA FLJ54750, moderately similar to Pyrroline-5-carboxylate reductase 2 (EC 1.5.1.2) OS=Homo sapiens PE=2 SV=1	4.668	8.91365	2	2	2	359	36.7	8.04	2
High	P00338	L-lactate dehydrogenase A chain OS=Homo sapiens GN=LDHA PE=1 SV=2	4.667	6.3253	2	2	1	332	36.7	6.11	2
High	P62851	40S ribosomal protein S25 OS=Homo sapiens GN=RPS25 PE=1 SV=1	4.665	20	3	3	3	125	13.7	7.35	3
High	P26368	Splicing factor U2AF 65 kDa subunit OS=Homo sapiens GN=U2AF2 PE=1 SV=4	4.663	5.47368	2	2	2	475	53.5	6.83	2
High	Q6IB11	PGRMC1 protein OS=Homo sapiens GN=PGRMC1 PE=2 SV=1	4.623	11.7949	2	2	2	195	21.7	5.91	2
High	M0QYS1	60S ribosomal protein L13a (Fragment) OS=Homo sapiens GN=RPL13A PE=1 SV=2	4.619	9.52381	2	2	2	210	24.2	5.87	2
High	Q8N2S1	Latent-transforming growth factor beta-binding protein 4 OS=Homo sapiens GN=LTBP4 PE=1 SV=2	4.588	1.90887	2	2	2	1624	173.3	6.27	2
High	Q9NYF8	Bcl-2-associated transcription factor 1 OS=Homo sapiens GN=BCLAF1 PE=1 SV=2	4.585	3.36957	2	2	2	920	106.1	7.04	2
High	A0A024R5X7	ClpX caseinolytic peptidase X homolog (E. coli), isoform CRA_a OS=Homo sapiens GN=CLPX PE=4 SV=1	4.564	5.52923	3	3	3	633	69.2	8.84	3
High	P62847	40S ribosomal protein S24 OS=Homo sapiens GN=RPS24 PE=1 SV=1	4.564	11.2782	1	1	1	133	15.4	4.81	1
High	A0A0S2Z3F2	V-raf murine sarcoma 3611 viral oncogene-like protein isoform 2 (Fragment) OS=Homo sapiens GN=ARAF PE=2 SV=1	4.498	3.43699	2	2	1	611	68	5.73	2
High	O75521	Enoyl-CoA delta isomerase 2, mitochondrial OS=Homo sapiens GN=ECI2 PE=1 SV=4	4.498	4.06091	1	1	1	394	43.6	3.29	1
High	K7ERQ8	Uncharacterized protein (Fragment) OS=Homo sapiens PE=4 SV=1	4.474	8.86525	2	2	1	282	31.4	6.67	2
High	P49207	60S ribosomal protein L34 OS=Homo sapiens GN=RPL34 PE=1 SV=3	4.465	20.5128	3	3	3	117	13.3	6.74	3
High	B2R825	Alpha-1,4 glucan phosphorylase OS=Homo sapiens PE=2 SV=1	4.445	1.65289	1	1	1	847	97	4.59	1
High	A0A024R8U5	Splicing factor, arginine/serine-rich 2, isoform CRA_a OS=Homo sapiens GN=SFRS2 PE=4 SV=1	4.435	11.3122	2	2	2	221	25.5	7.39	2
High	D3DQZ8	Paired box gene 6 (Aniridia, keratitis), isoform CRA_a OS=Homo sapiens GN=PAX6 PE=4 SV=1	4.41	9.21053	3	3	3	456	50.3	9.91	3
High	Q59FZ4	Serine/threonine kinase 4 variant (Fragment) OS=Homo sapiens PE=2 SV=1	4.401	3.13112	1	1	1	511	57.8	4.76	1
High	J3QQ67	60S ribosomal protein L18 (Fragment) OS=Homo sapiens GN=RPL18 PE=1 SV=1	4.392	13.6842	2	2	2	190	21.8	7.52	2
High	B4DLJ3	cDNA FLJ51495, highly similar to ADP-ribosylation factor 5 OS=Homo sapiens PE=2 SV=1	4.384	9.17031	2	2	2	229	25.4	5.7	2
High	P58107	Epiplakin OS=Homo sapiens GN=EPPK1 PE=1 SV=2	4.379	0.766208	2	2	2	5090	555.3	5.55	2
High	Q08211	ATP-dependent RNA helicase A OS=Homo sapiens GN=DHX9 PE=1 SV=4	4.36	1.5748	2	2	2	1270	140.9	6.16	2
High	Q5T750	Skin-specific protein 32 OS=Homo sapiens GN=XP32 PE=1 SV=1	4.337	8	2	3	2	250	26.2	7.01	2
High	Q59EA2	Coronin (Fragment) OS=Homo sapiens PE=2 SV=1	4.334	4.79042	2	2	2	501	56.3	7.08	2
High	Q96D70	R3H domain-containing protein 4 OS=Homo sapiens GN=R3HDM4 PE=1 SV=3	4.326	6.34328	1	1	1	268	30.3	3.29	1
High	Q9BYD2	39S ribosomal protein L9, mitochondrial OS=Homo sapiens GN=MRPL9 PE=1 SV=2	4.324	8.98876	2	2	2	267	30.2	6.71	2
High	P05362	Intercellular adhesion molecule 1 OS=Homo sapiens GN=ICAM1 PE=1 SV=2	4.32	5.26316	2	2	2	532	57.8	7.33	2
High	E9PDI4	Ladinin-1 OS=Homo sapiens GN=LAD1 PE=1 SV=1	4.289	4.51977	2	2	2	531	58.6	6.84	2
High	Q8IVT2	Mitotic interactor and substrate of PLK1 OS=Homo sapiens GN=MISP PE=1 SV=1	4.268	5.74374	3	3	3	679	75.3	9.57	3
High	A8K897	cDNA FLJ78686, highly similar to Homo sapiens nucleoporin 93kDa (NUP93), mRNA OS=Homo sapiens PE=2 SV=1	4.263	3.4188	2	3	2	819	93.3	10.29	2
High	P30048	Thioredoxin-dependent peroxide reductase, mitochondrial OS=Homo sapiens GN=PRDX3 PE=1 SV=3	4.24	10.1562	2	3	2	256	27.7	8.97	2
High	I1SRC5	UBE2L3/KRAS fusion protein OS=Homo sapiens PE=2 SV=1	4.236	5.06757	1	1	1	296	34	3.72	1
High	P53621	Coatomer subunit alpha OS=Homo sapiens GN=COPA PE=1 SV=2	4.209	2.94118	2	2	2	1224	138.3	5.26	2
High	S4R369	39S ribosomal protein L37, mitochondrial OS=Homo sapiens GN=MRPL37 PE=1 SV=1	4.187	6.41822	2	2	2	483	54.9	7.02	2
High	P61254	60S ribosomal protein L26 OS=Homo sapiens GN=RPL26 PE=1 SV=1	4.18	21.3793	3	3	3	145	17.2	8.01	3
High	E9PCR7	2-oxoglutarate dehydrogenase, mitochondrial OS=Homo sapiens GN=OGDH PE=1 SV=1	4.173	2.79383	2	2	2	1038	117.6	6.59	2
High	V9HW63	Epididymis secretory sperm binding protein Li 97n OS=Homo sapiens GN=HEL-S-97n PE=2 SV=1	4.169	7.74908	2	2	2	271	30.5	6.4	2
High	B2R9K8	cDNA, FLJ94440, highly similar to Homo sapiens chaperonin containing TCP1, subunit 6A (zeta 1)(CCT6A), mRNA OS=Homo sapiens PE=2 SV=1	4.167	4.7081	2	2	2	531	57.9	5.54	2
High	P50402	Emerin OS=Homo sapiens GN=EMD PE=1 SV=1	4.133	12.9921	2	2	2	254	29	5.15	2
High	D2IYL2	Corneodesmosin OS=Homo sapiens GN=CDSN PE=4 SV=1	4.121	5.10397	2	2	2	529	51.5	6.02	2
High	Q15717	ELAV-like protein 1 OS=Homo sapiens GN=ELAVL1 PE=1 SV=2	4.11	8.28221	2	2	2	326	36.1	6.37	2
High	A0A1B0GW77	Alpha-aminoadipic semialdehyde dehydrogenase OS=Homo sapiens GN=ALDH7A1 PE=1 SV=1	4.097	5.59567	2	2	2	554	60	6.99	2
High	P40925	Malate dehydrogenase, cytoplasmic OS=Homo sapiens GN=MDH1 PE=1 SV=4	4.088	8.08383	2	2	2	334	36.4	5.86	2
High	A8MUS3	60S ribosomal protein L23a OS=Homo sapiens GN=RPL23A PE=1 SV=1	4.071	12.3711	2	2	2	194	21.9	7.54	2
High	Q53YD8	ADP-ribosylation factor-like 2 OS=Homo sapiens GN=hCG_23373 PE=2 SV=1	4.053	11.9565	2	2	2	184	20.9	6.62	2
High	F5H5P2	Uncharacterized protein OS=Homo sapiens PE=4 SV=1	4.051	2.92276	1	1	1	479	54.2	3.83	1
High	E5KSX8	Mitochondrial transcription factor A OS=Homo sapiens PE=4 SV=1	4.044	8.53659	2	2	2	246	29.1	6.56	2
High	H0YF29	UPF0598 protein C8orf82 (Fragment) OS=Homo sapiens GN=C8orf82 PE=1 SV=1	4.039	11.8774	2	2	2	261	28.6	7.24	2
High	B4DP80	NAD(P)H-hydrate epimerase OS=Homo sapiens GN=APOA1BP PE=2 SV=1	4.031	9.77199	2	3	2	307	33.6	10.95	2
High	O75390	Citrate synthase, mitochondrial OS=Homo sapiens GN=CS PE=1 SV=2	4.008	5.79399	2	2	2	466	51.7	6.66	2
High	B2R4A5	cDNA, FLJ92019, highly similar to Homo sapiens mitochondrial ribosomal protein S14 (MRPS14), nuclear gene encoding mitochondrial protein, mRNA OS=Homo sapiens PE=2 SV=1	4.002	11.7188	1	1	1	128	15.1	4.21	1
High	Q16610	Extracellular matrix protein 1 OS=Homo sapiens GN=ECM1 PE=1 SV=2	3.991	2.59259	1	1	1	540	60.6	4.82	1
High	A0A024RAI1	ARP3 actin-related protein 3 homolog (Yeast), isoform CRA_a OS=Homo sapiens GN=ACTR3 PE=3 SV=1	3.967	6.2201	2	2	2	418	47.3	6.75	2
High	Q9Y230	RuvB-like 2 OS=Homo sapiens GN=RUVBL2 PE=1 SV=3	3.95	5.18359	2	2	2	463	51.1	6.78	2
High	B9EG90	Topoisomerase (DNA) I OS=Homo sapiens GN=TOP1 PE=2 SV=1	3.948	3.52941	2	2	2	765	90.6	6.5	2
High	Q96D15	Reticulocalbin-3 OS=Homo sapiens GN=RCN3 PE=1 SV=1	3.876	4.26829	1	1	1	328	37.5	4.25	1
High	Q6GMX3	IGL@ protein OS=Homo sapiens GN=IGL@ PE=2 SV=1	3.874	10.5932	2	2	2	236	24.7	5.13	2
High	B7Z809	cDNA FLJ56016, highly similar to C-1-tetrahydrofolate synthase, cytoplasmic OS=Homo sapiens PE=2 SV=1	3.862	2.54902	2	2	2	1020	110.4	7	2
High	A8K9B2	cDNA FLJ76725, highly similar to Homo sapiens L-2-hydroxyglutarate dehydrogenase (L2HGDH), mRNA OS=Homo sapiens PE=2 SV=1	3.85	5.83153	2	2	2	463	50.4	6.07	2
High	Q9BZE9	Tether containing UBX domain for GLUT4 OS=Homo sapiens GN=ASPSCR1 PE=1 SV=1	3.848	2.89331	1	1	1	553	60.1	5.03	1
High	Q9H5Q4	Dimethyladenosine transferase 2, mitochondrial OS=Homo sapiens GN=TFB2M PE=1 SV=1	3.847	5.55556	2	2	2	396	45.3	5.51	2
High	Q9UJZ1	Stomatin-like protein 2, mitochondrial OS=Homo sapiens GN=STOML2 PE=1 SV=1	3.83	12.6404	2	3	2	356	38.5	11.92	2
High	A0A024QZK8	Heterogeneous nuclear ribonucleoprotein H3 (2H9), isoform CRA_a OS=Homo sapiens GN=HNRPH3 PE=4 SV=1	3.811	5.78035	2	2	1	346	36.9	5.59	2
High	Q15046	Lysine--tRNA ligase OS=Homo sapiens GN=KARS PE=1 SV=3	3.807	4.85762	2	2	2	597	68	6.52	2
High	Q7Z6E9	E3 ubiquitin-protein ligase RBBP6 OS=Homo sapiens GN=RBBP6 PE=1 SV=1	3.799	1.84152	3	3	3	1792	201.4	6.49	3
High	P51398	28S ribosomal protein S29, mitochondrial OS=Homo sapiens GN=DAP3 PE=1 SV=1	3.788	6.78392	2	2	2	398	45.5	7.15	2
High	A0A024R7F9	Glutaryl-Coenzyme A dehydrogenase, isoform CRA_a OS=Homo sapiens GN=GCDH PE=3 SV=1	3.759	7.76256	2	2	2	438	48.1	6.36	2
High	J3KPP4	Cisplatin resistance-associated overexpressed protein, isoform CRA_b OS=Homo sapiens GN=LUC7L3 PE=1 SV=1	3.739	3.68098	1	1	1	489	58.2	4.53	1
High	Q8WTU2	Scavenger receptor cysteine-rich domain-containing group B protein OS=Homo sapiens GN=SSC4D PE=2 SV=1	3.734	4.34783	2	2	2	575	60.8	6.03	2
High	Q53HQ0	Flotillin 1 variant (Fragment) OS=Homo sapiens PE=2 SV=1	3.732	5.8548	2	2	2	427	47.3	6.11	2
High	P49916	DNA ligase 3 OS=Homo sapiens GN=LIG3 PE=1 SV=2	3.732	2.08127	2	2	2	1009	112.8	5.14	2
High	A0A024RBB7	Nucleosome assembly protein 1-like 1, isoform CRA_a OS=Homo sapiens GN=NAP1L1 PE=3 SV=1	3.715	7.16113	2	2	2	391	45.3	7.06	2
High	P17987	T-complex protein 1 subunit alpha OS=Homo sapiens GN=TCP1 PE=1 SV=1	3.712	3.77698	2	2	2	556	60.3	5.9	2
High	Q5HYG7	Putative uncharacterized protein DKFZp686M24262 OS=Homo sapiens GN=DKFZp686M24262 PE=2 SV=1	3.7	2.86344	1	1	1	454	50.3	3.41	1
High	P62314	Small nuclear ribonucleoprotein Sm D1 OS=Homo sapiens GN=SNRPD1 PE=1 SV=1	3.692	10.9244	2	2	2	119	13.3	6.43	2
High	Q02252	Methylmalonate-semialdehyde dehydrogenase [acylating], mitochondrial OS=Homo sapiens GN=ALDH6A1 PE=1 SV=2	3.648	3.73832	2	2	2	535	57.8	6.44	2
High	P62913	60S ribosomal protein L11 OS=Homo sapiens GN=RPL11 PE=1 SV=2	3.645	7.86517	1	2	1	178	20.2	7.77	1
High	A0A024R1U2	PHD finger protein 5A, isoform CRA_a OS=Homo sapiens GN=PHF5A PE=4 SV=1	3.62	11.8182	1	1	1	110	12.4	2.71	1
High	Q5TGY3	AT-hook DNA-binding motif-containing protein 1 OS=Homo sapiens GN=AHDC1 PE=1 SV=1	3.615	1.49719	2	2	2	1603	168.2	6.35	2
High	P12081	Histidine--tRNA ligase, cytoplasmic OS=Homo sapiens GN=HARS PE=1 SV=2	3.594	3.33988	2	2	2	509	57.4	4.95	2
High	P54727	UV excision repair protein RAD23 homolog B OS=Homo sapiens GN=RAD23B PE=1 SV=1	3.592	5.86797	2	2	2	409	43.1	5.91	2
High	P35914	Hydroxymethylglutaryl-CoA lyase, mitochondrial OS=Homo sapiens GN=HMGCL PE=1 SV=2	3.585	4.30769	1	1	1	325	34.3	4.29	1
High	B4DUT8	Calponin OS=Homo sapiens GN=CNN2 PE=1 SV=1	3.572	6.66667	2	2	2	330	35.9	5.8	2
High	Q8NDT2	Putative RNA-binding protein 15B OS=Homo sapiens GN=RBM15B PE=1 SV=3	3.549	3.93258	2	2	2	890	97.1	6.69	2
High	A4D1G5	40S ribosomal protein S27 OS=Homo sapiens GN=LOC392748 PE=3 SV=1	3.542	8.78378	1	1	1	148	16.9	3.94	1
High	F4ZW62	NF45 OS=Homo sapiens PE=1 SV=1	3.537	6.41026	2	2	2	390	43	7.07	2
High	B0YIW2	Apolipoprotein C-III OS=Homo sapiens GN=APOC3 PE=1 SV=1	3.536	13.6752	1	1	1	117	12.8	3.89	1
High	H9ZYJ2	Thioredoxin OS=Homo sapiens GN=TXN PE=2 SV=1	3.534	17.1429	2	2	2	105	11.7	4.36	2
High	A8K3T5	cDNA FLJ78278, highly similar to Homo sapiens zinc finger protein 219 (ZNF219), mRNA OS=Homo sapiens PE=2 SV=1	3.513	2.07756	1	1	1	722	76.8	3.7	1
High	P62633	Cellular nucleic acid-binding protein OS=Homo sapiens GN=CNBP PE=1 SV=1	3.491	11.2994	2	2	2	177	19.5	5.1	2
High	Q9H4K7	Mitochondrial ribosome-associated GTPase 2 OS=Homo sapiens GN=MTG2 PE=1 SV=1	3.488	4.92611	1	1	1	406	43.9	4.6	1
High	P17676	CCAAT/enhancer-binding protein beta OS=Homo sapiens GN=CEBPB PE=1 SV=2	3.484	8.98551	2	2	2	345	36.1	7.86	2
High	Q13595	Transformer-2 protein homolog alpha OS=Homo sapiens GN=TRA2A PE=1 SV=1	3.476	4.96454	1	1	1	282	32.7	3.72	1
High	Q92688	Acidic leucine-rich nuclear phosphoprotein 32 family member B OS=Homo sapiens GN=ANP32B PE=1 SV=1	3.473	6.3745	1	1	1	251	28.8	3.11	1
High	O95503	Chromobox protein homolog 6 OS=Homo sapiens GN=CBX6 PE=1 SV=1	3.444	5.09709	1	1	1	412	43.9	4.51	1
High	A0A024R7E3	DNA (cytosine-5)-methyltransferase OS=Homo sapiens GN=DNMT1 PE=3 SV=1	3.436	0.834327	1	1	1	1678	189.4	3.78	1
High	Q05D08	PA2G4 protein (Fragment) OS=Homo sapiens GN=PA2G4 PE=2 SV=1	3.436	6.40394	2	2	2	406	45.1	4.59	2
High	O00425	Insulin-like growth factor 2 mRNA-binding protein 3 OS=Homo sapiens GN=IGF2BP3 PE=1 SV=2	3.431	4.4905	2	2	2	579	63.7	6.33	2
High	P26373	60S ribosomal protein L13 OS=Homo sapiens GN=RPL13 PE=1 SV=4	3.428	9.00474	2	2	2	211	24.2	5	2
High	Q96QK1	Vacuolar protein sorting-associated protein 35 OS=Homo sapiens GN=VPS35 PE=1 SV=2	3.425	1.88442	1	2	1	796	91.6	6.34	1
High	Q7L3T8	Probable proline--tRNA ligase, mitochondrial OS=Homo sapiens GN=PARS2 PE=1 SV=1	3.418	4.63158	2	2	2	475	53.2	5.26	2
High	B2RA03	cDNA, FLJ94640, highly similar to Homo sapiens keratin 18 (KRT18), mRNA OS=Homo sapiens PE=2 SV=1	3.418	4.4186	2	4	1	430	48	10.09	2
High	A0A024QZY5	PRP4 pre-mRNA processing factor 4 homolog B (Yeast), isoform CRA_a OS=Homo sapiens GN=PRPF4B PE=4 SV=1	3.418	1.68818	1	1	1	1007	116.9	3.93	1
High	B5MBX0	Sororin OS=Homo sapiens GN=CDCA5 PE=1 SV=1	3.414	9.44625	2	2	2	307	33.7	7.08	2
High	A0A024R023	HCG36730, isoform CRA_a OS=Homo sapiens GN=hCG_36730 PE=4 SV=1	3.406	7.35294	2	2	2	476	52.8	8.66	2
High	P31153	S-adenosylmethionine synthase isoform type-2 OS=Homo sapiens GN=MAT2A PE=1 SV=1	3.403	3.79747	1	1	1	395	43.6	3.53	1
High	A0A140VJW3	Sushi domain containing 2, isoform CRA_a OS=Homo sapiens GN=SUSD2 PE=2 SV=1	3.394	1.82482	1	1	1	822	90.2	3.52	1
High	V9HW12	Epididymis secretory sperm binding protein Li 2a OS=Homo sapiens GN=HEL-S-2a PE=2 SV=1	3.391	14.6465	2	3	1	198	21.9	11.24	2
High	F8W727	60S ribosomal protein L32 OS=Homo sapiens GN=RPL32 PE=1 SV=1	3.376	8.49673	1	1	1	153	18	3.81	1
High	B2R694	Terpene cyclase/mutase family member OS=Homo sapiens PE=2 SV=1	3.376	1.77596	1	1	1	732	83.4	3.49	1
High	A8K3Z5	Nucleoporin NUP53 OS=Homo sapiens PE=2 SV=1	3.375	5.82822	1	1	1	326	34.8	4.04	1
High	A8K5Q1	cDNA FLJ77548, highly similar to Homo sapiens bin3, bicoid-interacting 3, homolog (Drosophila) (BCDIN3), mRNA OS=Homo sapiens PE=2 SV=1	3.367	3.48331	1	1	1	689	74.3	4.67	1
High	P30044	Peroxiredoxin-5, mitochondrial OS=Homo sapiens GN=PRDX5 PE=1 SV=4	3.363	12.6168	2	2	2	214	22.1	7.18	2
High	B4DEG7	cDNA FLJ59238, highly similar to SNW domain-containing protein 1 OS=Homo sapiens PE=2 SV=1	3.355	2.62697	1	2	1	571	65.4	6.79	1
High	P17029	Zinc finger protein with KRAB and SCAN domains 1 OS=Homo sapiens GN=ZKSCAN1 PE=1 SV=3	3.354	5.68384	2	2	2	563	63.6	5.77	2
High	D6RF35	Vitamin D-binding protein OS=Homo sapiens GN=GC PE=1 SV=1	3.332	7.98319	2	2	2	476	53	4.46	2
High	Q53G35	Phosphoglycerate mutase (Fragment) OS=Homo sapiens PE=2 SV=1	3.326	9.44882	2	2	2	254	28.8	6.69	2
High	A0A0U1RQC9	Cellular tumor antigen p53 OS=Homo sapiens GN=TP53 PE=1 SV=1	3.319	4.14634	1	1	1	410	45.9	4.69	1
High	Q9BQ69	O-acetyl-ADP-ribose deacetylase MACROD1 OS=Homo sapiens GN=MACROD1 PE=1 SV=2	3.316	7.07692	1	1	1	325	35.5	5.57	1
High	Q08AE8	Protein spire homolog 1 OS=Homo sapiens GN=SPIRE1 PE=1 SV=3	3.314	2.77778	1	1	1	756	85.5	3.99	1
High	A0A0G2JMX7	Microtubule-associated protein OS=Homo sapiens GN=MAPT PE=1 SV=1	3.3	2.06186	1	2	1	776	80.9	7.85	1
High	X6RAY8	39S ribosomal protein L4, mitochondrial OS=Homo sapiens GN=MRPL4 PE=1 SV=1	3.266	4.48179	1	1	1	357	39.6	0	1
High	O60568	Procollagen-lysine,2-oxoglutarate 5-dioxygenase 3 OS=Homo sapiens GN=PLOD3 PE=1 SV=1	3.239	4.20054	2	2	2	738	84.7	6.18	2
High	Q9UI42	Carboxypeptidase A4 OS=Homo sapiens GN=CPA4 PE=1 SV=2	3.214	5.46318	2	2	2	421	47.3	6.06	2
High	P08574	Cytochrome c1, heme protein, mitochondrial OS=Homo sapiens GN=CYC1 PE=1 SV=3	3.205	4.92308	1	1	1	325	35.4	3.69	1
High	Q8TF72	Protein Shroom3 OS=Homo sapiens GN=SHROOM3 PE=1 SV=2	3.197	1.2024	1	1	1	1996	216.7	4.88	1
High	Q9NRX2	39S ribosomal protein L17, mitochondrial OS=Homo sapiens GN=MRPL17 PE=1 SV=1	3.192	9.14286	2	2	2	175	20	4.58	2
High	A0A024R1S8	LIM and SH3 protein 1, isoform CRA_b OS=Homo sapiens GN=LASP1 PE=4 SV=1	3.181	5.36398	1	1	1	261	29.7	4.02	1
High	A0A0J9YW98	HCG31704 OS=Homo sapiens GN=ZNF623 PE=1 SV=1	3.13	3.35821	2	2	2	536	61.4	4.73	2
High	P20618	Proteasome subunit beta type-1 OS=Homo sapiens GN=PSMB1 PE=1 SV=2	3.122	5.80913	1	1	1	241	26.5	3.68	1
High	A0A024R5X3	SAFB-like, transcription modulator, isoform CRA_b OS=Homo sapiens GN=SLTM PE=4 SV=1	3.114	1.5411	1	1	1	1168	131.5	4.44	1
High	P61626	Lysozyme C OS=Homo sapiens GN=LYZ PE=1 SV=1	3.103	8.10811	1	1	1	148	16.5	3.7	1
High	O14639	Actin-binding LIM protein 1 OS=Homo sapiens GN=ABLIM1 PE=1 SV=3	3.103	2.82776	2	2	2	778	87.6	6.59	2
High	Q8N556	Actin filament-associated protein 1 OS=Homo sapiens GN=AFAP1 PE=1 SV=2	3.097	3.42466	2	2	2	730	80.7	5.5	2
High	Q6FII1	Glutathione S-transferase kappa 1 OS=Homo sapiens GN=LOC51064 PE=2 SV=1	3.094	6.19469	1	1	1	226	25.5	4.01	1
High	A0A024R6I7	Alpha-1-antitrypsin OS=Homo sapiens GN=SERPINA1 PE=1 SV=1	3.092	6.69856	2	2	2	418	46.7	6.59	2
High	Q14157	Ubiquitin-associated protein 2-like OS=Homo sapiens GN=UBAP2L PE=1 SV=2	3.087	2.02392	2	2	2	1087	114.5	6.28	2
High	A8MU27	Small ubiquitin-related modifier 3 OS=Homo sapiens GN=SUMO3 PE=1 SV=1	3.082	8.16327	1	1	1	147	16.9	4.04	1
High	B0YJ32	Laminin alpha-3 chain variant 1 OS=Homo sapiens GN=LAMA3 PE=4 SV=1	3.071	0.65967	1	1	1	3335	366.7	4.94	1
High	A8K8D9	Glucose-6-phosphate 1-dehydrogenase OS=Homo sapiens PE=2 SV=1	3.067	3.1068	1	1	1	515	59.3	2.77	1
High	Q0VDC6	Peptidylprolyl isomerase OS=Homo sapiens GN=FKBP1A PE=1 SV=1	3.045	9.65517	1	1	1	145	15.7	3.69	1
High	O14613	Cdc42 effector protein 2 OS=Homo sapiens GN=CDC42EP2 PE=1 SV=1	3.04	12.8571	1	1	1	210	22.5	2.95	1
High	Q96D53	Atypical kinase COQ8B, mitochondrial OS=Homo sapiens GN=COQ8B PE=1 SV=2	3.037	4.22794	1	1	1	544	60	4.15	1
High	A0A0S2Z2Z6	Annexin (Fragment) OS=Homo sapiens GN=ANXA6 PE=2 SV=1	3.027	2.97177	2	2	2	673	75.8	5.25	2
High	Q53YP0	PreS1 binding protein OS=Homo sapiens PE=2 SV=1	3.016	3.55649	2	2	2	478	54.4	4.63	2
High	H3BN98	Uncharacterized protein (Fragment) OS=Homo sapiens PE=4 SV=2	3.016	7.59494	2	2	2	237	27.2	5.28	2
High	Q8WWI1	LIM domain only protein 7 OS=Homo sapiens GN=LMO7 PE=1 SV=3	2.998	0.891266	1	1	1	1683	192.6	3.08	1
High	Q6SPF0	Atherin OS=Homo sapiens GN=SAMD1 PE=1 SV=1	2.994	5.20446	2	2	2	538	56	6.26	2
High	P28074	Proteasome subunit beta type-5 OS=Homo sapiens GN=PSMB5 PE=1 SV=3	2.988	3.80228	1	1	1	263	28.5	3.24	1
High	B2R9S4	cDNA, FLJ94534, highly similar to Homo sapiens capping protein (actin filament), gelsolin-like(CAPG), mRNA OS=Homo sapiens PE=2 SV=1	2.976	3.73563	1	1	1	348	38.5	4.4	1
High	A8K4W0	40S ribosomal protein S3a OS=Homo sapiens GN=RPS3A PE=2 SV=1	2.962	6.06061	2	3	2	264	29.9	7.46	2
High	B7ZM99	MTHFD1L protein OS=Homo sapiens GN=MTHFD1L PE=1 SV=1	2.952	1.22574	1	1	1	979	105.8	3.51	1
High	P36551	Oxygen-dependent coproporphyrinogen-III oxidase, mitochondrial OS=Homo sapiens GN=CPOX PE=1 SV=3	2.947	4.84581	2	2	2	454	50.1	5.94	2
High	A0A1B0GTL5	Rab11 family-interacting protein 5 OS=Homo sapiens GN=RAB11FIP5 PE=1 SV=1	2.927	2.1148	1	1	1	1324	138.3	4.81	1
High	O00483	Cytochrome c oxidase subunit NDUFA4 OS=Homo sapiens GN=NDUFA4 PE=1 SV=1	2.924	14.8148	1	1	1	81	9.4	3.04	1
High	V9HW91	Epididymis secretory sperm binding protein Li 8a OS=Homo sapiens GN=HEL-S-8a PE=2 SV=1	2.923	5.43478	1	1	1	276	30.6	4.4	1
High	P51571	Translocon-associated protein subunit delta OS=Homo sapiens GN=SSR4 PE=1 SV=1	2.906	11.5607	2	2	2	173	19	4.64	2
High	P78527	DNA-dependent protein kinase catalytic subunit OS=Homo sapiens GN=PRKDC PE=1 SV=3	2.882	0.339147	1	1	1	4128	468.8	3.85	1
High	A0A024RA75	3-hydroxyisobutyrate dehydrogenase OS=Homo sapiens GN=HIBADH PE=3 SV=1	2.852	5.35714	1	1	1	336	35.3	4.39	1
High	Q00325	Phosphate carrier protein, mitochondrial OS=Homo sapiens GN=SLC25A3 PE=1 SV=2	2.84	3.31492	1	1	1	362	40.1	3.32	1
High	Q14966	Zinc finger protein 638 OS=Homo sapiens GN=ZNF638 PE=1 SV=2	2.837	0.707786	1	1	1	1978	220.5	3.43	1
High	Q96I99	Succinate--CoA ligase [GDP-forming] subunit beta, mitochondrial OS=Homo sapiens GN=SUCLG2 PE=1 SV=2	2.827	4.39815	2	2	2	432	46.5	4.61	2
High	Q01167	Forkhead box protein K2 OS=Homo sapiens GN=FOXK2 PE=1 SV=3	2.826	8.48485	2	2	2	660	69	7.33	2
High	A8K761	NADH dehydrogenase (Ubiquinone) 1 beta subcomplex, 10, 22kDa, isoform CRA_b OS=Homo sapiens GN=NDUFB10 PE=2 SV=1	2.826	12.2093	2	2	2	172	20.8	5.69	2
High	E5KS95	Elongation factor Ts, mitochondrial OS=Homo sapiens GN=TSFM PE=3 SV=1	2.819	5.23077	1	1	1	325	35.4	4.35	1
High	A8K9A4	cDNA FLJ75154, highly similar to Homo sapiens heterogeneous nuclear ribonucleoprotein C (C1/C2), mRNA OS=Homo sapiens PE=2 SV=1	2.809	3.92157	1	1	1	306	33.6	3.14	1
High	E7ESZ7	NADH dehydrogenase [ubiquinone] 1 alpha subcomplex subunit 10, mitochondrial OS=Homo sapiens GN=NDUFA10 PE=1 SV=1	2.804	3.07692	1	1	1	390	44.7	3.14	1
High	P82673	28S ribosomal protein S35, mitochondrial OS=Homo sapiens GN=MRPS35 PE=1 SV=1	2.799	8.35913	1	1	1	323	36.8	4.25	1
High	Q96AQ6	Pre-B-cell leukemia transcription factor-interacting protein 1 OS=Homo sapiens GN=PBXIP1 PE=1 SV=1	2.796	2.05198	1	1	1	731	80.6	4	1
High	A0A0J9YXF2	Paraoxonase 2, isoform CRA_a OS=Homo sapiens GN=PON2 PE=1 SV=1	2.795	4.26667	1	1	1	375	41.5	4.57	1
High	B7Z8Q2	cDNA FLJ55606, highly similar to Alpha-2-HS-glycoprotein OS=Homo sapiens PE=2 SV=1	2.792	6.46651	2	2	2	433	46.6	5.41	2
High	Q8N5N7	39S ribosomal protein L50, mitochondrial OS=Homo sapiens GN=MRPL50 PE=1 SV=2	2.775	12.6582	1	1	1	158	18.3	3.67	1
High	P25685	DnaJ homolog subfamily B member 1 OS=Homo sapiens GN=DNAJB1 PE=1 SV=4	2.747	6.17647	2	2	2	340	38	5.61	2
High	Q2NKY6	Uncharacterized protein OS=Homo sapiens PE=2 SV=1	2.743	5.20833	1	2	1	192	21.7	5.75	1
High	A0A024QZS4	Peptidyl-prolyl cis-trans isomerase OS=Homo sapiens GN=PPIF PE=3 SV=1	2.733	10.1449	1	1	1	207	22	3.48	1
High	Q6DD87	Zinc finger protein 787 OS=Homo sapiens GN=ZNF787 PE=1 SV=3	2.725	4.96084	1	1	1	383	40.5	3.28	1
High	O95785	Protein Wiz OS=Homo sapiens GN=WIZ PE=1 SV=2	2.725	0.605694	1	1	1	1651	178.6	2.66	1
High	Q96AB3	Isochorismatase domain-containing protein 2 OS=Homo sapiens GN=ISOC2 PE=1 SV=1	2.721	7.31707	1	1	1	205	22.3	3.23	1
High	O00487	26S proteasome non-ATPase regulatory subunit 14 OS=Homo sapiens GN=PSMD14 PE=1 SV=1	2.705	4.19355	1	1	1	310	34.6	3.11	1
High	B0YIW6	Archain 1, isoform CRA_a OS=Homo sapiens GN=ARCN1 PE=1 SV=1	2.699	4.52899	2	2	2	552	61.6	6.23	2
High	Q02241	Kinesin-like protein KIF23 OS=Homo sapiens GN=KIF23 PE=1 SV=3	2.697	1.45833	1	1	1	960	110	3.62	1
High	B3KMQ6	cDNA FLJ12172 fis, clone MAMMA1000684, highly similar to Opioid growth factor receptor OS=Homo sapiens PE=2 SV=1	2.695	2.36337	1	1	1	677	73.3	3.2	1
High	Q08554	Desmocollin-1 OS=Homo sapiens GN=DSC1 PE=1 SV=2	2.688	1.45414	1	1	1	894	99.9	4	1
High	A0A090N8Y9	Similar to RP9 protein OS=Homo sapiens GN=LOC392652 PE=4 SV=1	2.683	2.95858	1	1	1	338	38.2	3.92	1
High	Q8TCD0	Uncharacterized protein OS=Homo sapiens PE=1 SV=1	2.674	15.8996	2	2	2	239	26.2	5.56	2
High	A0A024R3D8	Acetyltransferase component of pyruvate dehydrogenase complex OS=Homo sapiens GN=DLAT PE=3 SV=1	2.659	2.62751	1	1	1	647	68.9	3.9	1
High	A0A140VK70	Testis secretory sperm-binding protein Li 197a OS=Homo sapiens PE=2 SV=1	2.647	5.54273	2	2	2	433	48.6	6.48	2
High	Q13608	Peroxisome assembly factor 2 OS=Homo sapiens GN=PEX6 PE=1 SV=2	2.645	2.95918	2	2	2	980	104	8.28	2
High	G8IFA7	p90 OS=Homo sapiens PE=2 SV=1	2.629	3.34572	1	1	1	538	59.4	4.03	1
High	A0A024R4H0	Procollagen-lysine 1, 2-oxoglutarate 5-dioxygenase 1, isoform CRA_a OS=Homo sapiens GN=PLOD1 PE=4 SV=1	2.62	1.65062	1	1	1	727	83.5	3.9	1
High	P54819	Adenylate kinase 2, mitochondrial OS=Homo sapiens GN=AK2 PE=1 SV=2	2.611	4.1841	1	1	1	239	26.5	3.11	1
High	P35268	60S ribosomal protein L22 OS=Homo sapiens GN=RPL22 PE=1 SV=2	2.598	10.1562	1	1	1	128	14.8	3.83	1
High	B2RA34	cDNA, FLJ94678, highly similar to Homo sapiens BCL2-associated athanogene 4 (BAG4), mRNA OS=Homo sapiens PE=2 SV=1	2.597	6.78337	2	2	2	457	49.6	4.86	2
High	Q08188	Protein-glutamine gamma-glutamyltransferase E OS=Homo sapiens GN=TGM3 PE=1 SV=4	2.588	3.6075	2	2	2	693	76.6	5.53	2
High	Q9UGM3	Deleted in malignant brain tumors 1 protein OS=Homo sapiens GN=DMBT1 PE=1 SV=2	2.584	6.96229	1	1	1	2413	260.6	3.92	1
High	G5E977	Nicotinate phosphoribosyltransferase OS=Homo sapiens GN=NAPRT PE=1 SV=1	2.582	2.05479	1	1	1	584	62.1	3.45	1
High	G9K388	YWHAE/FAM22A fusion protein (Fragment) OS=Homo sapiens GN=YWHAE/FAM22A fusion PE=2 SV=1	2.581	4.94792	2	2	1	384	41.2	5.2	2
High	O00299	Chloride intracellular channel protein 1 OS=Homo sapiens GN=CLIC1 PE=1 SV=4	2.577	7.46888	1	1	1	241	26.9	3.93	1
High	A0A024R866	Ribosomal protein L35, isoform CRA_a OS=Homo sapiens GN=RPL35 PE=3 SV=1	2.574	5.91716	1	1	1	169	17.8	3.22	1
High	Q06710	Paired box protein Pax-8 OS=Homo sapiens GN=PAX8 PE=1 SV=2	2.571	4.44444	1	1	1	450	48.2	3.92	1
High	P17812	CTP synthase 1 OS=Homo sapiens GN=CTPS1 PE=1 SV=2	2.568	2.03046	1	1	1	591	66.6	3.2	1
High	Q6ZVX7	F-box only protein 50 OS=Homo sapiens GN=NCCRP1 PE=1 SV=1	2.543	10.9091	1	1	1	275	30.8	5.26	1
High	Q9BYE4	Small proline-rich protein 2G OS=Homo sapiens GN=SPRR2G PE=3 SV=1	2.536	17.8082	1	1	1	73	8.2	2.76	1
High	P26196	Probable ATP-dependent RNA helicase DDX6 OS=Homo sapiens GN=DDX6 PE=1 SV=2	2.527	3.10559	1	1	1	483	54.4	3.65	1
High	A0A0A0MRK6	Metaxin 1, isoform CRA_b OS=Homo sapiens GN=MTX1 PE=1 SV=1	2.526	3.43348	1	1	1	466	51.4	4.51	1
High	Q4LE36	ACLY variant protein (Fragment) OS=Homo sapiens GN=ACLY variant protein PE=2 SV=1	2.524	1.23131	1	1	1	1137	124.5	3.34	1
High	P31947	14-3-3 protein sigma OS=Homo sapiens GN=SFN PE=1 SV=1	2.523	6.45161	2	2	1	248	27.8	4.73	2
High	D3DQ70	SERPINE1 mRNA binding protein 1, isoform CRA_d OS=Homo sapiens GN=SERBP1 PE=4 SV=1	2.511	3.44086	1	1	1	465	50.9	4.41	1
High	Q9NRR5	Ubiquilin-4 OS=Homo sapiens GN=UBQLN4 PE=1 SV=2	2.508	2.66223	1	1	1	601	63.8	4.16	1
High	P05109	Protein S100-A8 OS=Homo sapiens GN=S100A8 PE=1 SV=1	2.506	11.828	1	1	1	93	10.8	2.97	1
High	P05198	Eukaryotic translation initiation factor 2 subunit 1 OS=Homo sapiens GN=EIF2S1 PE=1 SV=3	2.496	4.7619	1	1	1	315	36.1	3.99	1
High	P55039	Developmentally-regulated GTP-binding protein 2 OS=Homo sapiens GN=DRG2 PE=1 SV=1	2.496	3.02198	1	1	1	364	40.7	3.22	1
High	E7ERK9	Translation initiation factor eIF-2B subunit delta OS=Homo sapiens GN=EIF2B4 PE=1 SV=1	2.489	2.02206	1	1	1	544	59.7	3.46	1
High	Q9BXW7	Cat eye syndrome critical region protein 5 OS=Homo sapiens GN=CECR5 PE=1 SV=1	2.468	4.49173	1	1	1	423	46.3	2.72	1
High	O75400	Pre-mRNA-processing factor 40 homolog A OS=Homo sapiens GN=PRPF40A PE=1 SV=2	2.462	3.65726	2	2	2	957	108.7	7.23	2
High	Q9HC52	Chromobox protein homolog 8 OS=Homo sapiens GN=CBX8 PE=1 SV=3	2.457	5.65553	2	2	2	389	43.4	4.72	2
High	A0A024R2Q4	Ribosomal protein L15 OS=Homo sapiens GN=RPL15 PE=3 SV=1	2.452	11.2745	2	2	2	204	24.1	5.78	2
High	P07814	Bifunctional glutamate/proline--tRNA ligase OS=Homo sapiens GN=EPRS PE=1 SV=5	2.451	1.19048	2	2	2	1512	170.5	4.71	2
High	Q99497	Protein deglycase DJ-1 OS=Homo sapiens GN=PARK7 PE=1 SV=2	2.445	13.7566	1	2	1	189	19.9	8.49	1
High	Q8TAA3	Proteasome subunit alpha type-7-like OS=Homo sapiens GN=PSMA8 PE=2 SV=3	2.444	4.29688	1	1	1	256	28.5	3.11	1
High	B2R679	cDNA, FLJ92825, highly similar to Homo sapiens SAR1a gene homolog 1 (S. cerevisiae) (SARA1), mRNA OS=Homo sapiens PE=2 SV=1	2.426	6.06061	1	1	1	198	22.3	3.15	1
High	P47989	Xanthine dehydrogenase/oxidase OS=Homo sapiens GN=XDH PE=1 SV=4	2.419	0.975244	1	1	1	1333	146.3	3.81	1
High	Q5JWF2	Guanine nucleotide-binding protein G(s) subunit alpha isoforms XLas OS=Homo sapiens GN=GNAS PE=1 SV=2	2.416	1.06075	1	1	1	1037	111	2.92	1
High	P04843	Dolichyl-diphosphooligosaccharide--protein glycosyltransferase subunit 1 OS=Homo sapiens GN=RPN1 PE=1 SV=1	2.408	2.80066	1	1	1	607	68.5	4.41	1
High	E9PQ57	mRNA export factor OS=Homo sapiens GN=RAE1 PE=1 SV=1	2.404	3.43249	1	1	1	437	47.8	3.72	1
High	Q13427	Peptidyl-prolyl cis-trans isomerase G OS=Homo sapiens GN=PPIG PE=1 SV=2	2.402	2.38727	1	1	1	754	88.6	3.45	1
High	A0A024QZW2	Nucleolar protein 7, 27kDa, isoform CRA_a OS=Homo sapiens GN=NOL7 PE=4 SV=1	2.39	5.44747	1	1	1	257	29.4	3.97	1
High	A0A024R1T1	Ribosomal protein S19 binding protein 1, isoform CRA_a OS=Homo sapiens GN=RPS19BP1 PE=4 SV=1	2.39	9.55882	1	1	1	136	15.4	3.29	1
High	P61962	DDB1- and CUL4-associated factor 7 OS=Homo sapiens GN=DCAF7 PE=1 SV=1	2.385	4.38596	1	1	1	342	38.9	3.26	1
High	A0A087WY85	Ubiquitin-conjugating enzyme E2 D3 OS=Homo sapiens GN=UBE2D3 PE=1 SV=1	2.384	7.43243	1	1	1	148	16.8	2.93	1
High	B9EKV4	Aldehyde dehydrogenase 9 family, member A1 OS=Homo sapiens GN=ALDH9A1 PE=2 SV=1	2.382	2.89575	1	1	1	518	56.3	3.44	1
High	H3BNX8	Cytochrome c oxidase subunit 5A, mitochondrial OS=Homo sapiens GN=COX5A PE=1 SV=1	2.361	9.80392	1	1	1	153	17.2	2.94	1
High	P28070	Proteasome subunit beta type-4 OS=Homo sapiens GN=PSMB4 PE=1 SV=4	2.358	7.57576	1	1	1	264	29.2	3.38	1
High	Q9H8Y8	Golgi reassembly-stacking protein 2 OS=Homo sapiens GN=GORASP2 PE=1 SV=3	2.357	3.53982	1	1	1	452	47.1	4.41	1
High	Q16513	Serine/threonine-protein kinase N2 OS=Homo sapiens GN=PKN2 PE=1 SV=1	2.355	1.42276	1	1	1	984	112	3.76	1
High	P0DME0	Protein SETSIP OS=Homo sapiens GN=SETSIP PE=1 SV=1	2.338	4.63576	1	1	1	302	34.9	3.13	1
High	Q5VV42	Threonylcarbamoyladenosine tRNA methylthiotransferase OS=Homo sapiens GN=CDKAL1 PE=1 SV=1	2.337	4.66321	2	2	2	579	65.1	6.86	2
High	Q00587	Cdc42 effector protein 1 OS=Homo sapiens GN=CDC42EP1 PE=1 SV=1	2.33	4.85934	1	1	1	391	40.3	3.87	1
High	B4DMM9	cDNA FLJ59723, highly similar to Tribbles homolog 3 OS=Homo sapiens PE=2 SV=1	2.324	4.15584	1	1	1	385	42.7	3.21	1
High	H0UI06	Cytochrome c oxidase subunit 7A2, mitochondrial OS=Homo sapiens GN=COX7A2 PE=1 SV=1	2.321	11.3043	1	1	1	115	12.8	3.66	1
High	A0A024R0Q5	Protein phosphatase 1, regulatory (Inhibitor) subunit 13 like, isoform CRA_a OS=Homo sapiens GN=PPP1R13L PE=4 SV=1	2.315	3.1401	2	2	2	828	89	6.43	2
High	P62330	ADP-ribosylation factor 6 OS=Homo sapiens GN=ARF6 PE=1 SV=2	2.312	6.28571	1	1	1	175	20.1	2.95	1
High	B7Z2P6	cDNA FLJ55296, highly similar to Homo sapiens WD repeat domain 42A (WDR42A), mRNA OS=Homo sapiens PE=2 SV=1	2.307	1.99734	1	1	1	751	84.7	3.31	1
High	O60488	Long-chain-fatty-acid--CoA ligase 4 OS=Homo sapiens GN=ACSL4 PE=1 SV=2	2.306	2.1097	1	1	1	711	79.1	3.24	1
High	A0A0S2Z5L1	ATP-binding cassette sub-family F member 3 isoform 1 (Fragment) OS=Homo sapiens GN=ABCF3 PE=2 SV=1	2.286	1.83357	1	1	1	709	79.7	3.13	1
High	F8VW96	Cysteine and glycine-rich protein 2 OS=Homo sapiens GN=CSRP2 PE=1 SV=1	2.284	6.17284	1	1	1	243	26.7	3.7	1
High	Q15738	Sterol-4-alpha-carboxylate 3-dehydrogenase, decarboxylating OS=Homo sapiens GN=NSDHL PE=1 SV=2	2.28	4.55764	2	2	2	373	41.9	4.78	2
High	A0A140VJW5	Testicular tissue protein Li 192 OS=Homo sapiens PE=2 SV=1	2.274	3.79242	1	1	1	501	57.1	3.22	1
High	P26639	Threonine--tRNA ligase, cytoplasmic OS=Homo sapiens GN=TARS PE=1 SV=3	2.272	1.38313	1	1	1	723	83.4	3.21	1
High	Q969X5	Endoplasmic reticulum-Golgi intermediate compartment protein 1 OS=Homo sapiens GN=ERGIC1 PE=1 SV=1	2.271	3.44828	1	1	1	290	32.6	3.09	1
High	Q9UJY1	Heat shock protein beta-8 OS=Homo sapiens GN=HSPB8 PE=1 SV=1	2.266	5.10204	1	1	1	196	21.6	2.92	1
High	A4D0V4	Capping protein (Actin filament) muscle Z-line, alpha 2 OS=Homo sapiens GN=CAPZA2 PE=2 SV=1	2.263	3.4965	1	1	1	286	32.9	3.34	1
High	P21912	Succinate dehydrogenase [ubiquinone] iron-sulfur subunit, mitochondrial OS=Homo sapiens GN=SDHB PE=1 SV=3	2.248	3.21429	1	1	1	280	31.6	3.15	1
High	V5YQU3	FGFR2-BICC1 fusion kinase protein OS=Homo sapiens GN=FGFR2-BICC1 PE=2 SV=1	2.232	0.825921	1	1	1	1574	172.6	3.97	1
High	Q4KMQ1	Taperin OS=Homo sapiens GN=TPRN PE=1 SV=2	2.232	2.95359	2	2	2	711	75.5	5.77	2
High	A8K4W2	cDNA FLJ78635, highly similar to Homo sapiens ATP synthase, H+ transporting, mitochondrial F0 complex, subunit b, isoform 1 (ATP5F1), transcript variant 1, mRNA OS=Homo sapiens PE=2 SV=1	2.223	4.6875	1	1	1	256	28.9	3.25	1
High	Q96FQ6	Protein S100-A16 OS=Homo sapiens GN=S100A16 PE=1 SV=1	2.214	10.6796	1	1	1	103	11.8	3.34	1
High	P56385	ATP synthase subunit e, mitochondrial OS=Homo sapiens GN=ATP5I PE=1 SV=2	2.213	27.5362	2	2	2	69	7.9	4.53	2
High	J3KQ48	Peptidyl-tRNA hydrolase 2, mitochondrial OS=Homo sapiens GN=PTRH2 PE=1 SV=1	2.21	8.33333	1	1	1	180	19.3	3.1	1
High	A0A024RAV5	V-Ki-ras2 Kirsten rat sarcoma viral oncogene homolog, isoform CRA_b OS=Homo sapiens GN=KRAS PE=1 SV=1	2.196	6.38298	1	1	1	188	21.4	3.39	1
High	P17980	26S protease regulatory subunit 6A OS=Homo sapiens GN=PSMC3 PE=1 SV=3	2.191	2.50569	1	2	1	439	49.2	5.77	1
High	P14174	Macrophage migration inhibitory factor OS=Homo sapiens GN=MIF PE=1 SV=4	2.19	7.82609	1	1	1	115	12.5	2.48	1
High	P16401	Histone H1.5 OS=Homo sapiens GN=HIST1H1B PE=1 SV=3	2.186	5.30973	1	1	1	226	22.6	3.32	1
High	B3KY60	cDNA FLJ16777 fis, clone BRHIP2029567, highly similar to Cell division cycle 5-like protein OS=Homo sapiens PE=2 SV=1	2.181	1.24688	1	1	1	802	92.2	2.18	1
High	Q9Y5L4	Mitochondrial import inner membrane translocase subunit Tim13 OS=Homo sapiens GN=TIMM13 PE=1 SV=1	2.18	11.5789	1	1	1	95	10.5	2.82	1
High	V9HWA6	Epididymis luminal protein 32 OS=Homo sapiens GN=HEL32 PE=2 SV=1	2.159	6.66667	1	1	1	165	18.5	2.61	1
High	A0A0A6YYG9	Protein ARPC4-TTLL3 OS=Homo sapiens GN=ARPC4-TTLL3 PE=4 SV=1	2.133	1.76	1	1	1	625	71.7	2.86	1
High	A0A024R395	MRE11 meiotic recombination 11 homolog A (S. cerevisiae), isoform CRA_a OS=Homo sapiens GN=MRE11A PE=3 SV=1	2.127	1.83616	1	1	1	708	80.5	3.42	1
High	A0A024R6W2	Nudix (Nucleoside diphosphate linked moiety X)-type motif 21, isoform CRA_a OS=Homo sapiens GN=NUDT21 PE=4 SV=1	2.121	6.60793	1	1	1	227	26.2	3.12	1
High	B5LY71	Uridine monophosphate synthetase isoform I OS=Homo sapiens GN=UMPS PE=2 SV=1	2.115	4.16667	1	1	1	480	52.2	3.8	1
High	Q8N3D4	EH domain-binding protein 1-like protein 1 OS=Homo sapiens GN=EHBP1L1 PE=1 SV=2	2.11	0.656599	1	1	1	1523	161.8	2.89	1
High	A0A140VK41	Testicular secretory protein Li 41 OS=Homo sapiens PE=2 SV=1	2.102	3.73832	1	1	1	321	35	2.99	1
High	Q13952	Nuclear transcription factor Y subunit gamma OS=Homo sapiens GN=NFYC PE=1 SV=3	2.098	2.62009	1	1	1	458	50.3	2.99	1
High	A0A140VJR2	Testicular tissue protein Li 138 OS=Homo sapiens PE=2 SV=1	2.096	2.0284	1	1	1	493	54.5	2.97	1
High	Q2QGD7	Zinc finger protein ZXDC OS=Homo sapiens GN=ZXDC PE=1 SV=2	2.092	3.2634	2	2	2	858	89.9	5.58	2
High	B5ME19	Eukaryotic translation initiation factor 3 subunit C-like protein OS=Homo sapiens GN=EIF3CL PE=3 SV=1	2.092	1.09409	1	1	1	914	105.4	2.96	1
High	A8K401	Prohibitin, isoform CRA_a OS=Homo sapiens GN=PHB PE=2 SV=1	2.089	4.04412	1	1	1	272	29.8	2.69	1
High	Q9BR76	Coronin-1B OS=Homo sapiens GN=CORO1B PE=1 SV=1	2.082	2.65849	1	1	1	489	54.2	2.8	1
High	Q9Y3Y2	Chromatin target of PRMT1 protein OS=Homo sapiens GN=CHTOP PE=1 SV=2	2.081	5.24194	1	1	1	248	26.4	2.78	1
High	Q13887	Krueppel-like factor 5 OS=Homo sapiens GN=KLF5 PE=1 SV=2	2.077	5.03282	1	1	1	457	50.8	3.25	1
High	B2RCM2	cDNA, FLJ96156, highly similar to Homo sapiens leucyl-tRNA synthetase (LARS), mRNA OS=Homo sapiens PE=2 SV=1	2.076	1.10544	1	1	1	1176	134.4	2.66	1
High	Q01469	Fatty acid-binding protein, epidermal OS=Homo sapiens GN=FABP5 PE=1 SV=3	2.072	6.66667	1	1	1	135	15.2	2.51	1
High	A0A024R6R2	Glutamic pyruvate transaminase (Alanine aminotransferase) 2, isoform CRA_b OS=Homo sapiens GN=GPT2 PE=4 SV=1	2.067	2.29446	1	1	1	523	57.9	3.96	1
High	E9PB61	THO complex subunit 4 OS=Homo sapiens GN=ALYREF PE=1 SV=1	2.066	9.4697	1	1	1	264	27.5	4.33	1
High	P52209	6-phosphogluconate dehydrogenase, decarboxylating OS=Homo sapiens GN=PGD PE=1 SV=3	2.057	4.14079	2	2	2	483	53.1	5.24	2
High	Q9BUS0	ZYX protein (Fragment) OS=Homo sapiens GN=ZYX PE=2 SV=2	2.054	4.30293	1	1	1	581	62.4	4.7	1
High	P56159	GDNF family receptor alpha-1 OS=Homo sapiens GN=GFRA1 PE=2 SV=2	2.048	2.7957	1	1	1	465	51.4	3.17	1
High	A0A024RAC5	Regulator of chromosome condensation 2, isoform CRA_a OS=Homo sapiens GN=RCC2 PE=4 SV=1	2.04	1.91571	1	1	1	522	56	2.89	1
High	A0A0G2JPP5	Protein scribble homolog OS=Homo sapiens GN=SCRIB PE=1 SV=1	2.04	0.845921	1	1	1	1655	177.6	3.36	1
High	A0A075B7F8	Nuclear envelope pore membrane protein POM 121C OS=Homo sapiens GN=POM121C PE=1 SV=2	2.038	1.62734	1	1	1	1229	125	2.55	1
High	Q59G98	TIA1 protein variant (Fragment) OS=Homo sapiens PE=4 SV=1	2.037	2.80172	1	1	1	464	51.3	3.82	1
High	Q8IWZ3	Ankyrin repeat and KH domain-containing protein 1 OS=Homo sapiens GN=ANKHD1 PE=1 SV=1	2.031	0.629426	1	1	1	2542	269.3	2.84	1
High	Q59GK9	Ribosomal protein L21 variant (Fragment) OS=Homo sapiens PE=2 SV=1	2.029	6.74847	1	2	1	163	18.9	6.38	1
High	L0R588	Alternative protein C11orf48 OS=Homo sapiens GN=C11orf48 PE=4 SV=1	2.028	8.1761	1	1	1	159	18.4	3.86	1
High	O15347	High mobility group protein B3 OS=Homo sapiens GN=HMGB3 PE=1 SV=4	2.023	6.5	1	1	1	200	23	3.37	1
High	O75376	Nuclear receptor corepressor 1 OS=Homo sapiens GN=NCOR1 PE=1 SV=2	2.022	0.532787	1	1	1	2440	270	3.34	1
High	A0A024R497	Acyl-CoA synthetase long-chain family member 3, isoform CRA_a OS=Homo sapiens GN=ACSL3 PE=4 SV=1	2.022	2.08333	1	1	1	720	80.4	3.11	1
High	Q59FJ0	Proteasome subunit beta type (Fragment) OS=Homo sapiens PE=2 SV=1	2.011	6.0241	1	1	1	249	27.8	3.46	1
High	P48307	Tissue factor pathway inhibitor 2 OS=Homo sapiens GN=TFPI2 PE=1 SV=1	2.011	8.51064	1	1	1	235	26.9	2.73	1
High	Q08431	Lactadherin OS=Homo sapiens GN=MFGE8 PE=1 SV=2	2.005	3.35917	1	2	1	387	43.1	7.05	1
High	A8K8K1	cDNA FLJ76936, highly similar to Homo sapiens RNA terminal phosphate cyclase domain 1 (RTCD1), mRNA OS=Homo sapiens PE=2 SV=1	1.994	2.73224	1	1	1	366	39.3	3.03	1
High	Q99959	Plakophilin-2 OS=Homo sapiens GN=PKP2 PE=1 SV=2	1.987	3.63224	1	1	1	881	97.4	4.13	1
High	O95218	Zinc finger Ran-binding domain-containing protein 2 OS=Homo sapiens GN=ZRANB2 PE=1 SV=2	1.978	3.33333	1	1	1	330	37.4	3.39	1
High	B4DTU7	10-formyltetrahydrofolate dehydrogenase OS=Homo sapiens PE=2 SV=1	1.977	1.40845	1	1	1	923	101.7	3.59	1
High	Q9Y277	Voltage-dependent anion-selective channel protein 3 OS=Homo sapiens GN=VDAC3 PE=1 SV=1	1.975	3.88693	1	1	1	283	30.6	3.12	1
High	O14828	Secretory carrier-associated membrane protein 3 OS=Homo sapiens GN=SCAMP3 PE=1 SV=3	1.939	4.61095	1	1	1	347	38.3	4.09	1
High	A8K6V3	cDNA FLJ78677, highly similar to Homo sapiens splicing factor 3b, subunit 3, 130kDa (SF3B3), mRNA OS=Homo sapiens PE=2 SV=1	1.935	0.986031	1	1	1	1217	135.5	2.55	1
High	P78371	T-complex protein 1 subunit beta OS=Homo sapiens GN=CCT2 PE=1 SV=4	1.925	4.11215	1	1	1	535	57.5	4.48	1
High	B4DRE5	cDNA FLJ55391 OS=Homo sapiens PE=2 SV=1	1.914	4.61538	1	1	1	325	35.3	2.41	1
High	A6YID6	Fibronectin splice variant E (Fragment) OS=Homo sapiens GN=FN1 PE=2 SV=1	1.913	5.12422	2	2	2	644	70.2	6.47	2
High	P25398	40S ribosomal protein S12 OS=Homo sapiens GN=RPS12 PE=1 SV=3	1.907	6.81818	1	1	1	132	14.5	2.77	1
High	P55259	Pancreatic secretory granule membrane major glycoprotein GP2 OS=Homo sapiens GN=GP2 PE=2 SV=3	1.896	1.67598	1	1	1	537	59.4	2.23	1
High	B4DN31	cDNA FLJ55809 OS=Homo sapiens PE=2 SV=1	1.894	2.64317	1	1	1	454	51	3.09	1
High	Q96BR5	Cytochrome c oxidase assembly factor 7 OS=Homo sapiens GN=COA7 PE=1 SV=2	1.892	3.8961	1	1	1	231	25.7	2.79	1
High	B4E1U9	cDNA FLJ54776, highly similar to Cell division control protein 42 homolog OS=Homo sapiens PE=2 SV=1	1.873	4.23729	1	1	1	236	26.5	1.95	1
High	O75964	ATP synthase subunit g, mitochondrial OS=Homo sapiens GN=ATP5L PE=1 SV=3	1.871	14.5631	1	1	1	103	11.4	3.2	1
High	B2R4D5	Actin-related protein 2/3 complex subunit 3 OS=Homo sapiens PE=2 SV=1	1.87	6.17978	1	1	1	178	20.5	3.55	1
High	Q08257	Quinone oxidoreductase OS=Homo sapiens GN=CRYZ PE=1 SV=1	1.868	3.34347	1	1	1	329	35.2	2.3	1
High	P49821	NADH dehydrogenase [ubiquinone] flavoprotein 1, mitochondrial OS=Homo sapiens GN=NDUFV1 PE=1 SV=4	1.866	6.89655	1	1	1	464	50.8	3.88	1
High	A0A0B4J203	Uncharacterized protein OS=Homo sapiens PE=3 SV=1	1.863	2.23793	1	1	1	849	94.6	3.31	1
High	A0A024R9D7	2,4-dienoyl CoA reductase 1, mitochondrial, isoform CRA_b OS=Homo sapiens GN=DECR1 PE=4 SV=1	1.86	6.56716	1	1	1	335	36	4.62	1
High	O14737	Programmed cell death protein 5 OS=Homo sapiens GN=PDCD5 PE=1 SV=3	1.855	10.4	1	1	1	125	14.3	4.31	1
High	B3KTA5	cDNA FLJ37943 fis, clone CTONG2008621, highly similar to Syntaxin-17 OS=Homo sapiens PE=2 SV=1	1.855	6.29139	1	1	1	302	33.4	4.26	1
High	P61081	NEDD8-conjugating enzyme Ubc12 OS=Homo sapiens GN=UBE2M PE=1 SV=1	1.855	6.01093	1	1	1	183	20.9	2.8	1
High	P50570	Dynamin-2 OS=Homo sapiens GN=DNM2 PE=1 SV=2	1.854	1.14943	1	1	1	870	98	2.65	1
High	A8K666	cDNA FLJ75460, highly similar to Homo sapiens phenylalanine-tRNA synthetase-like, beta subunit, mRNA OS=Homo sapiens PE=2 SV=1	1.841	1.52801	1	1	1	589	66	2.33	1
High	Q13642	Four and a half LIM domains protein 1 OS=Homo sapiens GN=FHL1 PE=1 SV=4	1.84	3.40557	1	1	1	323	36.2	3.49	1
High	Q8WXF1	Paraspeckle component 1 OS=Homo sapiens GN=PSPC1 PE=1 SV=1	1.837	2.67686	1	1	1	523	58.7	4.03	1
High	A0A024R7X7	Staufen, RNA binding protein, homolog 2 (Drosophila), isoform CRA_b OS=Homo sapiens GN=STAU2 PE=4 SV=1	1.836	2.45614	1	1	1	570	62.6	3.34	1
High	P49406	39S ribosomal protein L19, mitochondrial OS=Homo sapiens GN=MRPL19 PE=1 SV=2	1.834	3.08219	1	1	1	292	33.5	2.57	1
High	C3VMY8	Alpha B crystallin OS=Homo sapiens GN=CRYAB PE=2 SV=1	1.833	7.42857	1	2	1	175	20.1	6.13	1
High	A0A0S2PZM4	Bifunctional arginine demethylase and lysyl-hydroxylase JMJD6 OS=Homo sapiens GN=JMJD6 PE=4 SV=1	1.829	3.1401	1	1	1	414	47.6	2.96	1
High	B4DKM0	cDNA FLJ51883, highly similar to Mitochondrial 39S ribosomal protein L3 OS=Homo sapiens PE=2 SV=1	1.823	2.4	1	1	1	375	41.6	2.51	1
High	Q6LES2	Annexin (Fragment) OS=Homo sapiens GN=ANXA4 PE=2 SV=1	1.822	4.6729	1	1	1	321	36.1	3.55	1
High	Q3KQU3	MAP7 domain-containing protein 1 OS=Homo sapiens GN=MAP7D1 PE=1 SV=1	1.822	1.66468	1	1	1	841	92.8	2.87	1
High	K7EJ20	Glutathione peroxidase OS=Homo sapiens GN=GPX4 PE=1 SV=3	1.815	4.54545	1	1	1	242	26.8	3.13	1
High	H0YL70	Transducin-like enhancer protein 3 OS=Homo sapiens GN=TLE3 PE=1 SV=1	1.804	1.40665	1	1	1	782	84.4	3.42	1
High	P23381	Tryptophan--tRNA ligase, cytoplasmic OS=Homo sapiens GN=WARS PE=1 SV=2	1.799	2.76008	1	1	1	471	53.1	2.77	1
High	B4DGM9	Torsin family 1, member A (Torsin A), isoform CRA_a OS=Homo sapiens GN=TOR1A PE=2 SV=1	1.797	2.74725	1	1	1	364	40.8	2.65	1
High	Q9Y679	Ancient ubiquitous protein 1 OS=Homo sapiens GN=AUP1 PE=1 SV=1	1.792	3.78151	1	1	1	476	53	3.26	1
High	E5KLJ5	Dynamin-like 120 kDa protein, mitochondrial OS=Homo sapiens GN=OPA1 PE=1 SV=1	1.791	1.08374	1	1	1	1015	117.7	2.83	1
High	Q9H3H9	Transcription elongation factor A protein-like 2 OS=Homo sapiens GN=TCEAL2 PE=2 SV=1	1.786	3.96476	1	1	1	227	25.8	2.63	1
High	B4E3T4	HCG2043421, isoform CRA_c OS=Homo sapiens GN=RBPMS PE=1 SV=1	1.781	4.91071	1	1	1	224	25	2.89	1
High	O95243	Methyl-CpG-binding domain protein 4 OS=Homo sapiens GN=MBD4 PE=1 SV=1	1.777	2.06897	1	1	1	580	66	2.84	1
High	Q6FHY3	LOR protein OS=Homo sapiens GN=LOR PE=2 SV=1	1.764	2.53165	1	1	1	316	26	3.39	1
High	Q9BQ95	Evolutionarily conserved signaling intermediate in Toll pathway, mitochondrial OS=Homo sapiens GN=ECSIT PE=1 SV=1	1.763	2.5522	1	1	1	431	49.1	3.57	1
High	B4DHQ3	Phosphoserine aminotransferase OS=Homo sapiens PE=2 SV=1	1.763	3.13253	1	1	1	415	45.3	3.57	1
High	P82914	28S ribosomal protein S15, mitochondrial OS=Homo sapiens GN=MRPS15 PE=1 SV=1	1.762	3.50195	1	1	1	257	29.8	2.45	1
High	P38606	V-type proton ATPase catalytic subunit A OS=Homo sapiens GN=ATP6V1A PE=1 SV=2	1.756	2.75527	1	1	1	617	68.3	3.04	1
High	A0A024R718	Pre-B-cell colony enhancing factor 1, isoform CRA_a OS=Homo sapiens GN=PBEF1 PE=4 SV=1	1.743	4.27699	1	1	1	491	55.5	3.47	1
High	Q8IXI1	Mitochondrial Rho GTPase 2 OS=Homo sapiens GN=RHOT2 PE=1 SV=2	1.731	1.45631	1	1	1	618	68.1	2.5	1
High	A0A087WZN1	Isocitrate dehydrogenase [NAD] subunit, mitochondrial OS=Homo sapiens GN=IDH3B PE=1 SV=1	1.726	2.06718	1	1	1	387	42.4	2.8	1
High	G4U4J3	PAP associated domain containing 5 OS=Homo sapiens GN=PAPD5 PE=2 SV=1	1.722	3.01109	1	1	1	631	69.6	2.8	1
High	Q14473	Uncharacterized protein OS=Homo sapiens PE=3 SV=1	1.716	5.71429	1	1	1	175	18.9	2.62	1
High	Q12873	Chromodomain-helicase-DNA-binding protein 3 OS=Homo sapiens GN=CHD3 PE=1 SV=3	1.715	0.45	1	1	1	2000	226.5	2.52	1
High	P22079	Lactoperoxidase OS=Homo sapiens GN=LPO PE=1 SV=2	1.7	1.40449	1	2	1	712	80.2	6.49	1
High	Q96FZ2	Embryonic stem cell-specific 5-hydroxymethylcytosine-binding protein OS=Homo sapiens GN=HMCES PE=1 SV=1	1.696	3.10734	1	1	1	354	40.5	2.82	1
High	A8K8U1	cDNA FLJ77762, highly similar to Homo sapiens cullin-associated and neddylation-dissociated 1 (CAND1), mRNA OS=Homo sapiens PE=2 SV=1	1.688	1.05691	1	1	1	1230	136.2	3.68	1
High	Q59EC0	Adenosine deaminase, RNA-specific isoform ADAR-a variant (Fragment) OS=Homo sapiens PE=2 SV=1	1.686	1.20579	1	1	1	1244	137.7	2.99	1
High	P36957	Dihydrolipoyllysine-residue succinyltransferase component of 2-oxoglutarate dehydrogenase complex, mitochondrial OS=Homo sapiens GN=DLST PE=1 SV=4	1.682	1.98675	1	1	1	453	48.7	2.19	1
High	Q9Y3B4	Splicing factor 3B subunit 6 OS=Homo sapiens GN=SF3B6 PE=1 SV=1	1.677	9.6	1	1	1	125	14.6	2.87	1
High	P55010	Eukaryotic translation initiation factor 5 OS=Homo sapiens GN=EIF5 PE=1 SV=2	1.668	2.08817	1	1	1	431	49.2	2.11	1
High	Q9BRK5	45 kDa calcium-binding protein OS=Homo sapiens GN=SDF4 PE=1 SV=1	1.662	2.48619	1	2	1	362	41.8	4.81	1
High	B7Z8Z6	DNA helicase OS=Homo sapiens PE=2 SV=1	1.654	1.25786	1	1	1	954	106.8	3.79	1
High	B2R6J3	cDNA, FLJ92974, highly similar to Homo sapiens methylmalonic aciduria (cobalamin deficiency) type B(MMAB), mRNA OS=Homo sapiens PE=1 SV=1	1.653	4	1	1	1	250	27.3	2.92	1
High	C9IZQ1	Translocon-associated protein subunit alpha OS=Homo sapiens GN=SSR1 PE=1 SV=1	1.652	2.68456	1	1	1	298	33.9	2.06	1
High	P38117	Electron transfer flavoprotein subunit beta OS=Homo sapiens GN=ETFB PE=1 SV=3	1.651	4.70588	1	1	1	255	27.8	3.27	1
High	P42126	Enoyl-CoA delta isomerase 1, mitochondrial OS=Homo sapiens GN=ECI1 PE=1 SV=1	1.65	4.30464	1	1	1	302	32.8	3.4	1
High	F6TB26	Tudor and KH domain-containing protein OS=Homo sapiens GN=TDRKH PE=1 SV=1	1.641	2.14876	1	1	1	605	66.9	3.67	1
High	Q13867	Bleomycin hydrolase OS=Homo sapiens GN=BLMH PE=1 SV=1	1.64	2.41758	1	1	1	455	52.5	2.74	1
High	A8K139	cDNA FLJ76744, highly similar to Homo sapiens L1 cell adhesion molecule (L1CAM), transcript variant 1, mRNA OS=Homo sapiens PE=2 SV=1	1.639	1.11376	1	1	1	1257	139.9	3.45	1
High	V9HW44	Epididymis secretory protein Li 303 OS=Homo sapiens GN=HEL-S-303 PE=2 SV=1	1.639	3.93013	1	1	1	229	25.6	2.55	1
High	B5BUB5	Autoantigen La (Fragment) OS=Homo sapiens GN=SSB PE=2 SV=1	1.638	3.18627	1	1	1	408	46.8	3.71	1
High	Q12955	Ankyrin-3 OS=Homo sapiens GN=ANK3 PE=1 SV=3	1.631	0.182774	1	1	1	4377	480.1	2.67	1
High	Q9Y508	E3 ubiquitin-protein ligase RNF114 OS=Homo sapiens GN=RNF114 PE=1 SV=1	1.629	4.82456	1	1	1	228	25.7	2.75	1
High	Q4ZH49	Zinc ion binding protein OS=Homo sapiens GN=DTX2 PE=1 SV=1	1.625	1.92926	1	1	1	622	67.2	3.18	1
High	B4DWA6	cDNA FLJ60094, highly similar to F-actin capping protein subunit beta OS=Homo sapiens PE=2 SV=1	1.621	2.68657	1	1	1	335	37.5	2.77	1
High	B2R838	cDNA, FLJ93726, highly similar to Homo sapiens ras homolog gene family, member E (ARHE), mRNA OS=Homo sapiens PE=2 SV=1	1.618	3.68852	1	1	1	244	27.3	3.11	1
High	Q53G19	Mitochondrial ribosomal protein L11 isoform a variant (Fragment) OS=Homo sapiens PE=2 SV=1	1.617	5.72917	1	1	1	192	20.6	2.89	1
High	A0A087WY73	Proline-rich protein 4 OS=Homo sapiens GN=PRR4 PE=4 SV=1	1.611	10.2041	1	1	1	147	16.9	2.93	1
High	Q59G24	Activated RNA polymerase II transcription cofactor 4 variant (Fragment) OS=Homo sapiens PE=2 SV=1	1.609	9.70149	1	1	1	134	15.1	3.43	1
High	Q75N03	E3 ubiquitin-protein ligase Hakai OS=Homo sapiens GN=CBLL1 PE=1 SV=1	1.609	4.07332	1	1	1	491	54.5	3.5	1
High	Q15392	Delta(24)-sterol reductase OS=Homo sapiens GN=DHCR24 PE=1 SV=2	1.602	1.74419	1	1	1	516	60.1	3.23	1
High	P01023	Alpha-2-macroglobulin OS=Homo sapiens GN=A2M PE=1 SV=3	1.601	0.746269	1	1	1	1474	163.2	2.74	1
High	P12273	Prolactin-inducible protein OS=Homo sapiens GN=PIP PE=1 SV=1	1.601	5.47945	1	1	1	146	16.6	2.21	1
High	Q59HH7	X-ray repair cross complementing protein 1 variant (Fragment) OS=Homo sapiens PE=2 SV=1	1.597	2.16383	1	1	1	647	71	3.46	1
High	Q15906	Vacuolar protein sorting-associated protein 72 homolog OS=Homo sapiens GN=VPS72 PE=1 SV=1	1.596	8.24176	1	1	1	364	40.6	3.25	1
High	Q53FD1	Zinc finger, HIT domain containing 2 variant (Fragment) OS=Homo sapiens PE=2 SV=1	1.593	2.23325	1	1	1	403	42.9	2.59	1
High	O43741	5'-AMP-activated protein kinase subunit beta-2 OS=Homo sapiens GN=PRKAB2 PE=1 SV=1	1.592	3.67647	1	1	1	272	30.3	2.98	1
High	A0A024R0L6	Platelet-activating factor acetylhydrolase, isoform Ib, gamma subunit 29kDa, isoform CRA_a OS=Homo sapiens GN=PAFAH1B3 PE=4 SV=1	1.59	3.8961	1	1	1	231	25.7	2.51	1
High	A0A024R7B7	CDC37 cell division cycle 37 homolog (S. cerevisiae), isoform CRA_a OS=Homo sapiens GN=CDC37 PE=4 SV=1	1.59	2.91005	1	1	1	378	44.4	2.55	1
High	B7Z3K9	Fructose-bisphosphate aldolase OS=Homo sapiens PE=2 SV=1	1.586	5.09978	1	1	1	451	48.4	3.51	1
High	Q9UHV9	Prefoldin subunit 2 OS=Homo sapiens GN=PFDN2 PE=1 SV=1	1.563	9.09091	1	1	1	154	16.6	3.62	1
High	Q8NCD3	Holliday junction recognition protein OS=Homo sapiens GN=HJURP PE=1 SV=2	1.558	2.40642	1	1	1	748	83.5	3.58	1
High	B2R9U2	Peptidylprolyl isomerase OS=Homo sapiens PE=2 SV=1	1.528	5.01089	1	1	1	459	51.8	3.87	1
High	Q9P206	Uncharacterized protein KIAA1522 OS=Homo sapiens GN=KIAA1522 PE=1 SV=2	1.519	1.73913	1	1	1	1035	107	3.78	1
High	Q15293	Reticulocalbin-1 OS=Homo sapiens GN=RCN1 PE=1 SV=1	1.518	2.41692	1	1	1	331	38.9	1.86	1
High	B4DM85	Kinesin-like protein OS=Homo sapiens PE=2 SV=1	1.514	1.47849	1	1	1	744	84	3.47	1
High	Q9BVQ7	Spermatogenesis-associated protein 5-like protein 1 OS=Homo sapiens GN=SPATA5L1 PE=1 SV=2	1.51	1.06242	1	1	1	753	80.7	2.39	1
High	A0A161I202	Lactoferrin OS=Homo sapiens GN=LTF PE=2 SV=1	1.51	1.26582	1	1	1	711	78.3	1.92	1
High	B3KXY9	cDNA FLJ46359 fis, clone TESTI4049786, highly similar to Hexokinase-1 (EC 2.7.1.1) OS=Homo sapiens PE=2 SV=1	1.499	0.840336	1	1	1	952	106.2	1.87	1
High	Q8NFH9	MLL/SEPTIN6 fusion protein (Fragment) OS=Homo sapiens PE=2 SV=1	1.483	1.61002	1	1	1	559	63.1	2.77	1
High	A0A024R9P1	HCG2026745, isoform CRA_a OS=Homo sapiens GN=hCG_2026745 PE=4 SV=1	1.477	3.93443	1	1	1	305	34.1	3.41	1
High	Q14566	DNA replication licensing factor MCM6 OS=Homo sapiens GN=MCM6 PE=1 SV=1	1.477	1.46163	1	1	1	821	92.8	3.08	1
High	P35321	Cornifin-A OS=Homo sapiens GN=SPRR1A PE=1 SV=2	1.472	8.98876	1	1	1	89	9.9	2.66	1
High	O15042	U2 snRNP-associated SURP motif-containing protein OS=Homo sapiens GN=U2SURP PE=1 SV=2	1.461	1.16618	1	1	1	1029	118.2	2.94	1
High	D9IAI1	Epididymis secretory protein Li 34 OS=Homo sapiens GN=PEBP1 PE=2 SV=1	1.455	7.48663	1	1	1	187	21	3.03	1
High	P35249	Replication factor C subunit 4 OS=Homo sapiens GN=RFC4 PE=1 SV=2	1.449	2.47934	1	1	1	363	39.7	2.62	1
High	B7Z8E7	cDNA FLJ55400, highly similar to Protein OS-9 OS=Homo sapiens PE=2 SV=1	1.449	1.48649	1	1	1	740	83.5	2.74	1
High	G3V5Z7	Proteasome subunit alpha type OS=Homo sapiens GN=PSMA6 PE=1 SV=1	1.449	3.57143	1	1	1	252	28.1	2.73	1
High	A0A0D9SGF6	Spectrin alpha chain, non-erythrocytic 1 OS=Homo sapiens GN=SPTAN1 PE=1 SV=1	1.448	0.440352	1	1	1	2498	287.4	2.86	1
High	A0A087WUH3	Contactin-associated protein-like 3B OS=Homo sapiens GN=CNTNAP3B PE=4 SV=1	1.444	3.10559	1	1	1	1288	140.3	5.44	1
High	P38432	Coilin OS=Homo sapiens GN=COIL PE=1 SV=1	1.443	1.5625	1	1	1	576	62.6	2.2	1
High	Q8WVX7	Ribosomal protein S19 (Fragment) OS=Homo sapiens PE=2 SV=1	1.437	5.73248	1	1	1	157	17.3	1.97	1
High	B3KRJ9	cDNA FLJ34439 fis, clone HLUNG2001146, highly similar to Splicing factor, arginine/serine-rich 12 OS=Homo sapiens PE=2 SV=1	1.436	2.72374	1	1	1	514	58.2	2.72	1
High	A8K6A2	cDNA FLJ77317, highly similar to Homo sapiens retinoblastoma binding protein 7 (RBBP7), mRNA OS=Homo sapiens PE=2 SV=1	1.434	1.88235	1	1	1	425	47.8	2.51	1
High	O43896	Kinesin-like protein KIF1C OS=Homo sapiens GN=KIF1C PE=1 SV=3	1.425	2.71985	1	1	1	1103	122.9	3.2	1
High	P56556	NADH dehydrogenase [ubiquinone] 1 alpha subcomplex subunit 6 OS=Homo sapiens GN=NDUFA6 PE=1 SV=3	1.421	5.19481	1	1	1	154	17.9	2.55	1
High	Q6FI91	TSPYL protein OS=Homo sapiens GN=TSPYL PE=2 SV=1	1.41	2.51142	1	1	1	438	49.3	3.01	1
High	A0A024R7U6	DNA helicase OS=Homo sapiens GN=MCM4 PE=3 SV=1	1.408	1.62225	1	1	1	863	96.5	3.49	1
High	Q7Z7A3	Cytoplasmic tRNA 2-thiolation protein 1 OS=Homo sapiens GN=CTU1 PE=1 SV=1	1.403	4.5977	1	1	1	348	36.4	3.95	1
High	Q6PKG0	La-related protein 1 OS=Homo sapiens GN=LARP1 PE=1 SV=2	1.389	0.729927	1	1	1	1096	123.4	2.31	1
High	O95398	Rap guanine nucleotide exchange factor 3 OS=Homo sapiens GN=RAPGEF3 PE=1 SV=6	1.386	0.758397	1	1	1	923	103.7	2.19	1
High	D0PNI2	Lysyl oxidase OS=Homo sapiens GN=LOX PE=4 SV=1	1.386	4.79616	1	1	1	417	46.9	3.17	1
High	J3QR07	YTH domain-containing protein 1 OS=Homo sapiens GN=YTHDC1 PE=1 SV=1	1.376	1.76871	1	1	1	735	85.5	3.28	1
High	P51970	NADH dehydrogenase [ubiquinone] 1 alpha subcomplex subunit 8 OS=Homo sapiens GN=NDUFA8 PE=1 SV=3	1.372	4.06977	1	1	1	172	20.1	1.82	1
High	Q53H12	Acylglycerol kinase, mitochondrial OS=Homo sapiens GN=AGK PE=1 SV=2	1.372	2.60664	1	1	1	422	47.1	2.65	1
High	A0A024R9K4	Forty-two-three domain containing 1, isoform CRA_a OS=Homo sapiens GN=FYTTD1 PE=4 SV=1	1.365	4.08805	1	1	1	318	35.8	3.38	1
High	B7Z4C8	60S ribosomal protein L31 OS=Homo sapiens GN=RPL31 PE=1 SV=1	1.365	10.7692	1	1	1	130	15.1	3.59	1
High	Q9Y3Z3	Deoxynucleoside triphosphate triphosphohydrolase SAMHD1 OS=Homo sapiens GN=SAMHD1 PE=1 SV=2	1.36	1.11821	1	1	1	626	72.2	2.2	1
High	O94776	Metastasis-associated protein MTA2 OS=Homo sapiens GN=MTA2 PE=1 SV=1	1.353	2.69461	1	1	1	668	75	2.77	1
High	B2R6Z3	cDNA, FLJ93192, highly similar to Homo sapiens serine/threonine kinase 6 (STK6), mRNA OS=Homo sapiens PE=2 SV=1	1.336	3.47395	1	1	1	403	45.8	3.05	1
High	O96019	Actin-like protein 6A OS=Homo sapiens GN=ACTL6A PE=1 SV=1	1.331	3.0303	1	1	1	429	47.4	3.19	1
High	A8K492	cDNA FLJ76789, highly similar to Homo sapiens methionine-tRNA synthetase (MARS), mRNA OS=Homo sapiens PE=2 SV=1	1.33	1.66667	1	1	1	900	101.1	2.22	1
High	Q13283	Ras GTPase-activating protein-binding protein 1 OS=Homo sapiens GN=G3BP1 PE=1 SV=1	1.326	2.7897	1	1	1	466	52.1	3.76	1
High	Q96IJ6	Mannose-1-phosphate guanyltransferase alpha OS=Homo sapiens GN=GMPPA PE=1 SV=1	1.326	3.57143	1	2	1	420	46.3	6.43	1
High	Q9Y3A4	Ribosomal RNA-processing protein 7 homolog A OS=Homo sapiens GN=RRP7A PE=1 SV=2	1.325	3.57143	1	1	1	280	32.3	2.79	1
High	Q9Y2X9	Zinc finger protein 281 OS=Homo sapiens GN=ZNF281 PE=1 SV=1	1.324	3.35196	1	1	1	895	96.9	3.24	1
High	A0A024RA40	Carboxypeptidase OS=Homo sapiens GN=CPVL PE=3 SV=1	1.324	2.73109	1	1	1	476	54.1	3.15	1
High	B4DUE4	cDNA FLJ61412, highly similar to Homo sapiens serine/threonine kinase 11 interacting protein (STK11IP), mRNA OS=Homo sapiens PE=2 SV=1	1.323	3.41085	1	1	1	645	71	3.7	1
High	A0A024RDE8	PDZ and LIM domain 5, isoform CRA_c OS=Homo sapiens GN=PDLIM5 PE=4 SV=1	1.323	1.51007	1	1	1	596	63.9	2.42	1
High	Q4LE58	eIF4G1 variant protein (Fragment) OS=Homo sapiens GN=EIF4G1 variant protein PE=2 SV=1	1.323	0.67734	1	1	1	1624	178	3.02	1
High	B2RB23	cDNA, FLJ95265, highly similar to Homo sapiens acetyl-Coenzyme A acyltransferase 2 (mitochondrial 3-oxoacyl-Coenzyme A thiolase) (ACAA2), nuclear gene encoding mitochondrial protein, mRNA OS=Homo sapiens PE=2 SV=1	1.314	2.77078	1	1	1	397	42	2.81	1
High	B7Z6M0	Peptidylprolyl isomerase OS=Homo sapiens PE=2 SV=1	1.312	3.62812	1	1	1	441	47.1	3.11	1
High	A0A024R0H2	Mitochondrial ribosomal protein S12, isoform CRA_a OS=Homo sapiens GN=MRPS12 PE=4 SV=1	1.305	6.52174	1	1	1	138	15.2	2.44	1
High	Q5U000	Cathepsin Z OS=Homo sapiens PE=2 SV=1	1.305	2.31023	1	1	1	303	33.8	2.19	1
High	A0A087WVQ6	Clathrin heavy chain OS=Homo sapiens GN=CLTC PE=1 SV=1	1.302	0.595593	1	1	1	1679	191.9	2.66	1
High	B2RCP7	cDNA, FLJ96197, highly similar to Homo sapiens connective tissue growth factor (CTGF), mRNA OS=Homo sapiens PE=2 SV=1	1.298	3.72493	1	1	1	349	38	2.95	1
High	J3KQ32	Obg-like ATPase 1 OS=Homo sapiens GN=OLA1 PE=1 SV=1	1.293	2.64423	1	1	1	416	46.9	2.88	1
High	Q6NUJ5	PWWP domain-containing protein 2B OS=Homo sapiens GN=PWWP2B PE=1 SV=3	1.282	1.86441	1	1	1	590	63.9	2.08	1
High	J3KNN5	Probable ATP-dependent RNA helicase DDX41 (Fragment) OS=Homo sapiens GN=DDX41 PE=1 SV=1	1.277	1.875	1	1	1	640	71.6	3.05	1
High	E5KMI6	Lon protease homolog, mitochondrial OS=Homo sapiens GN=LONP1 PE=3 SV=1	1.271	1.2513	1	1	1	959	106.4	2.71	1
High	M0R2B7	DNA polymerase OS=Homo sapiens GN=POLD1 PE=1 SV=1	1.258	0.794351	1	1	1	1133	126.3	1.98	1
High	A0A024R8N6	Thymidine kinase OS=Homo sapiens GN=TK1 PE=3 SV=1	1.256	5.07246	1	1	1	276	29.9	2.91	1
High	Q5T1Z8	Pumilio homolog 1 OS=Homo sapiens GN=PUM1 PE=1 SV=1	1.234	0.816993	1	1	1	1224	130	2.33	1
High	P12004	Proliferating cell nuclear antigen OS=Homo sapiens GN=PCNA PE=1 SV=1	1.228	4.21456	1	1	1	261	28.8	2.94	1
High	A0A140VKC8	Testis tissue sperm-binding protein Li 45a OS=Homo sapiens PE=2 SV=1	1.225	3.73832	1	1	1	321	35.9	3.17	1
High	J3KN66	Torsin-1A-interacting protein 1 OS=Homo sapiens GN=TOR1AIP1 PE=1 SV=1	1.224	2.17028	1	1	1	599	67.8	3.29	1
High	Q8N5A5	Zinc finger CCCH-type with G patch domain-containing protein OS=Homo sapiens GN=ZGPAT PE=1 SV=3	1.213	2.07156	1	1	1	531	57.3	2.35	1
High	Q14554	Protein disulfide-isomerase A5 OS=Homo sapiens GN=PDIA5 PE=1 SV=1	1.213	1.92678	1	1	1	519	59.6	3.01	1
High	Q5IRN2	DAZAP1/MEF2D fusion protein OS=Homo sapiens GN=DAZAP1/MEF2D fusion PE=2 SV=1	1.211	3.52423	1	1	1	454	48.9	4.03	1
High	Q13470	Non-receptor tyrosine-protein kinase TNK1 OS=Homo sapiens GN=TNK1 PE=1 SV=3	1.21	1.2012	1	1	1	666	72.4	2.45	1
High	P25490	Transcriptional repressor protein YY1 OS=Homo sapiens GN=YY1 PE=1 SV=2	1.208	1.93237	1	1	1	414	44.7	2.05	1
High	O00629	Importin subunit alpha-3 OS=Homo sapiens GN=KPNA4 PE=1 SV=1	1.204	5.56622	1	1	1	521	57.9	4.5	1
High	Q86WA8	Lon protease homolog 2, peroxisomal OS=Homo sapiens GN=LONP2 PE=1 SV=1	1.201	0.938967	1	1	1	852	94.6	2.16	1
High	Q96L34	MAP/microtubule affinity-regulating kinase 4 OS=Homo sapiens GN=MARK4 PE=1 SV=1	1.191	1.06383	1	1	1	752	82.5	2.08	1
High	Q15182	Small nuclear ribonucleoprotein-associated protein OS=Homo sapiens GN=SNRPB PE=2 SV=1	1.189	2.45614	1	1	1	285	29.7	1.78	1
High	J3KQ18	D-dopachrome decarboxylase OS=Homo sapiens GN=DDT PE=1 SV=1	1.187	8.33333	1	1	1	132	14.2	3.06	1
High	Q96HE7	ERO1-like protein alpha OS=Homo sapiens GN=ERO1A PE=1 SV=2	1.184	2.5641	1	1	1	468	54.4	3.47	1
High	P02749	Beta-2-glycoprotein 1 OS=Homo sapiens GN=APOH PE=1 SV=3	1.183	2.6087	1	1	1	345	38.3	2.68	1
High	P18031	Tyrosine-protein phosphatase non-receptor type 1 OS=Homo sapiens GN=PTPN1 PE=1 SV=1	1.179	2.52874	1	1	1	435	49.9	2.77	1
High	A0A140VJE8	AP complex subunit beta OS=Homo sapiens GN=AP2B1 PE=2 SV=1	1.179	1.36698	1	1	1	951	105.6	2.71	1
High	Q14247	Src substrate cortactin OS=Homo sapiens GN=CTTN PE=1 SV=2	1.176	2.18182	1	1	1	550	61.5	3.3	1
High	A8K5N5	cDNA FLJ78142, highly similar to Homo sapiens transglutaminase 1 (K polypeptide epidermal type I, protein-glutamine-gamma-glutamyltransferase), mRNA OS=Homo sapiens PE=2 SV=1	1.173	1.10159	1	1	1	817	89.7	2.47	1
High	P13473	Lysosome-associated membrane glycoprotein 2 OS=Homo sapiens GN=LAMP2 PE=1 SV=2	1.171	1.95122	1	1	1	410	44.9	2.48	1
High	P46087	Probable 28S rRNA (cytosine(4447)-C(5))-methyltransferase OS=Homo sapiens GN=NOP2 PE=1 SV=2	1.17	1.10837	1	1	1	812	89.2	2.72	1
High	P26641	Elongation factor 1-gamma OS=Homo sapiens GN=EEF1G PE=1 SV=3	1.169	1.60183	1	1	1	437	50.1	1.83	1
High	Q4VC44	FLYWCH-type zinc finger-containing protein 1 OS=Homo sapiens GN=FLYWCH1 PE=1 SV=2	1.166	1.81564	1	1	1	716	80.1	3.22	1
High	A0A024RBS2	60S acidic ribosomal protein P0 OS=Homo sapiens GN=RPLP0 PE=3 SV=1	1.165	5.36278	1	1	1	317	34.3	2.93	1
High	Q9NR19	Acetyl-coenzyme A synthetase, cytoplasmic OS=Homo sapiens GN=ACSS2 PE=1 SV=1	1.162	2.56776	1	1	1	701	78.5	3.46	1
High	A0A024R1V4	60S ribosomal protein L27 OS=Homo sapiens GN=RPL27 PE=3 SV=1	1.157	5.88235	1	1	1	136	15.8	1.86	1
High	V9HWA9	Epididymis secretory sperm binding protein Li 62p OS=Homo sapiens GN=HEL-S-62p PE=2 SV=1	1.154	0.721587	1	1	1	1663	187	2.77	1
High	Q15637	Splicing factor 1 OS=Homo sapiens GN=SF1 PE=1 SV=4	1.15	2.50391	1	1	1	639	68.3	3.02	1
High	B4DMN1	cDNA FLJ61136, highly similar to Ras-related protein Rab-11A OS=Homo sapiens PE=2 SV=1	1.144	3.06513	1	1	1	261	28.8	2.29	1
High	A8K2Q6	Peptidyl-prolyl cis-trans isomerase OS=Homo sapiens PE=2 SV=1	1.142	3.77358	1	1	1	212	22.7	0	1
High	B2R761	cDNA, FLJ93299, highly similar to Homo sapiens sterol carrier protein 2 (SCP2), mRNA OS=Homo sapiens PE=2 SV=1	1.137	1.46252	1	1	1	547	59	2.13	1
High	Q86YN6	Peroxisome proliferator-activated receptor gamma coactivator 1-beta OS=Homo sapiens GN=PPARGC1B PE=1 SV=2	1.134	1.07527	1	1	1	1023	113.2	2.62	1
High	Q643R3	Lysophospholipid acyltransferase LPCAT4 OS=Homo sapiens GN=LPCAT4 PE=1 SV=1	1.131	1.71756	1	1	1	524	57.2	2.71	1
High	Q8NB25	Protein FAM184A OS=Homo sapiens GN=FAM184A PE=2 SV=3	1.126	0.701754	1	1	1	1140	132.9	1.76	1
High	Q9NXS9	Dymeclin, isoform CRA_a OS=Homo sapiens GN=DYM PE=2 SV=1	1.123	7.07547	1	1	1	424	48	3.76	1
High	O94906	Pre-mRNA-processing factor 6 OS=Homo sapiens GN=PRPF6 PE=1 SV=1	1.122	1.0627	1	1	1	941	106.9	2.62	1
High	P46781	40S ribosomal protein S9 OS=Homo sapiens GN=RPS9 PE=1 SV=3	1.12	3.60825	1	1	1	194	22.6	2	1
High	J3KMX3	Alpha-fetoprotein OS=Homo sapiens GN=AFP PE=1 SV=1	1.118	2.57235	1	1	1	622	70.4	2.63	1
High	D6RC76	Centromere protein K (Fragment) OS=Homo sapiens GN=CENPK PE=1 SV=1	1.117	15.9091	1	1	1	176	20.7	3.08	1
Medium	Q9GZT1	Poly(RC) binding protein 4, isoform CRA_a OS=Homo sapiens GN=PCBP4 PE=2 SV=1	1.11	3.30189	1	1	1	424	43.8	2.74	1
Medium	O43423	Acidic leucine-rich nuclear phosphoprotein 32 family member C OS=Homo sapiens GN=ANP32C PE=2 SV=1	1.11	5.55556	1	1	1	234	26.7	2.97	1
Medium	Q9P0T4	Zinc finger protein 581 OS=Homo sapiens GN=ZNF581 PE=1 SV=1	1.096	5.07614	1	1	1	197	22	2.27	1
Medium	K7ES00	Histone H3.3 (Fragment) OS=Homo sapiens GN=H3F3B PE=1 SV=1	1.093	4.63576	1	1	1	151	16.6	2.2	1
Medium	A0A024R9B8	Plasma glutamate carboxypeptidase, isoform CRA_a OS=Homo sapiens GN=PGCP PE=4 SV=1	1.082	4.66102	1	1	1	472	51.9	4.94	1
Medium	P53634	Dipeptidyl peptidase 1 OS=Homo sapiens GN=CTSC PE=1 SV=2	1.082	2.59179	1	1	1	463	51.8	3.7	1
Medium	Q8WUK0	Phosphatidylglycerophosphatase and protein-tyrosine phosphatase 1 OS=Homo sapiens GN=PTPMT1 PE=1 SV=1	1.081	6.46766	1	1	1	201	22.8	3.42	1
Medium	Q96SL8	Flt3-interacting zinc finger protein 1 OS=Homo sapiens GN=FIZ1 PE=1 SV=2	1.069	2.01613	1	1	1	496	52	2.81	1
Medium	Q5HYI8	Rab-like protein 3 OS=Homo sapiens GN=RABL3 PE=1 SV=1	1.065	3.38983	1	1	1	236	26.4	2.57	1
Medium	P41091	Eukaryotic translation initiation factor 2 subunit 3 OS=Homo sapiens GN=EIF2S3 PE=1 SV=3	1.064	2.9661	1	1	1	472	51.1	3.19	1
Medium	Q03164	Histone-lysine N-methyltransferase 2A OS=Homo sapiens GN=KMT2A PE=1 SV=5	1.063	0.277148	1	1	1	3969	431.5	2.69	1
Medium	Q7L804	Rab11 family-interacting protein 2 OS=Homo sapiens GN=RAB11FIP2 PE=1 SV=1	1.061	2.73438	1	1	1	512	58.2	3.18	1
Medium	P53597	Succinate--CoA ligase [ADP/GDP-forming] subunit alpha, mitochondrial OS=Homo sapiens GN=SUCLG1 PE=1 SV=4	1.059	4.33526	1	1	1	346	36.2	3.65	1
Medium	Q8IVH2	Forkhead box protein P4 OS=Homo sapiens GN=FOXP4 PE=1 SV=1	1.056	3.08824	1	1	1	680	73.4	3.63	1
Medium	O60701	UDP-glucose 6-dehydrogenase OS=Homo sapiens GN=UGDH PE=1 SV=1	1.047	2.42915	1	1	1	494	55	2.81	1
Medium	Q9C0D2	Centrosomal protein of 295 kDa OS=Homo sapiens GN=CEP295 PE=1 SV=4	1.047	0.269127	1	1	1	2601	295	2.05	1
Medium	A8K732	cDNA FLJ78771, highly similar to Homo sapiens discs, large homolog 7 (Drosophila), mRNA OS=Homo sapiens PE=2 SV=1	1.045	1.89125	1	1	1	846	95.1	2.99	1
Medium	H7C302	DIS3-like exonuclease 2 (Fragment) OS=Homo sapiens GN=DIS3L2 PE=4 SV=1	1.044	51.4706	1	1	1	68	7.7	4.21	1
Medium	A8K6U2	cDNA FLJ78675, highly similar to Homo sapiens stroma HMG-box containing protein (HBP2) mRNA OS=Homo sapiens PE=2 SV=1	1.043	1.0627	1	1	1	941	105.1	2.67	1
Medium	Q9NQ36	Signal peptide, CUB and EGF-like domain-containing protein 2 OS=Homo sapiens GN=SCUBE2 PE=2 SV=2	1.042	2.8028	1	1	1	999	109.9	2.21	1
Medium	V9HW86	Epididymis luminal protein 251 OS=Homo sapiens GN=HEL-251 PE=2 SV=1	1.032	10.1695	1	1	1	118	13.8	2.39	1
Medium	A0A024R2M8	Xeroderma pigmentosum, complementation group C, isoform CRA_a OS=Homo sapiens GN=XPC PE=4 SV=1	1.03	1.06383	1	1	1	940	105.9	2.79	1
Medium	B4DTV0	cDNA FLJ57801, highly similar to Homo sapiens AHNAK nucleoprotein (desmoyokin) (AHNAK), transcript variant 1, mRNA (Fragment) OS=Homo sapiens PE=2 SV=1	1.026	0.648749	1	1	1	1079	114.1	2.1	1
Medium	B2RNR6	Zinc finger RNA binding protein OS=Homo sapiens GN=ZFR PE=2 SV=1	1.024	2.04842	1	1	1	1074	116.9	4.16	1
Medium	A0A075B6F9	Nitric oxide synthase-interacting protein OS=Homo sapiens GN=NOSIP PE=1 SV=1	1.024	5.92105	1	1	1	304	33.4	3.55	1
Medium	O43684	Mitotic checkpoint protein BUB3 OS=Homo sapiens GN=BUB3 PE=1 SV=1	1.021	4.26829	1	1	1	328	37.1	3.26	1
Medium	B3KQF4	cDNA FLJ90373 fis, clone NT2RP2004606, highly similar to Metalloproteinase inhibitor 1 OS=Homo sapiens PE=2 SV=1	1.021	5.7971	1	1	1	207	23.2	3.16	1
Medium	P23443	Ribosomal protein S6 kinase beta-1 OS=Homo sapiens GN=RPS6KB1 PE=1 SV=2	1.02	1.52381	1	1	1	525	59.1	2.33	1
Medium	B2R7P8	cDNA, FLJ93545, highly similar to Homo sapiens 5-aminoimidazole-4-carboxamide ribonucleotide formyltransferase/IMP cyclohydrolase (ATIC), mRNA OS=Homo sapiens PE=2 SV=1	1.015	1.85811	1	1	1	592	64.6	2.38	1
Medium	A8KAP3	cDNA FLJ78483, highly similar to Homo sapiens elongation factor Tu GTP binding domain containing 2 (EFTUD2), mRNA OS=Homo sapiens PE=2 SV=1	1.013	1.23457	1	1	1	972	109.4	2.78	1
Medium	A0A024R7N7	Interferon, gamma-inducible protein 30, isoform CRA_b OS=Homo sapiens GN=IFI30 PE=4 SV=1	1.006	4.4	1	1	1	250	27.9	2.32	1
Medium	Q02880	DNA topoisomerase 2-beta OS=Homo sapiens GN=TOP2B PE=1 SV=3	1.003	0.492005	1	1	1	1626	183.2	2.36	1
Medium	A8K0D4	cDNA FLJ78693, highly similar to Homo sapiens TAF6-like RNA polymerase II, p300/CBP-associated factor (PCAF)-associated factor, 65kDa (TAF6L), mRNA OS=Homo sapiens PE=2 SV=1	1.003	2.73312	1	1	1	622	67.7	3.35	1
Medium	P25789	Proteasome subunit alpha type-4 OS=Homo sapiens GN=PSMA4 PE=1 SV=1	0.998	3.83142	1	1	1	261	29.5	3.03	1
Medium	P27694	Replication protein A 70 kDa DNA-binding subunit OS=Homo sapiens GN=RPA1 PE=1 SV=2	0.997	2.11039	1	1	1	616	68.1	2.66	1
Medium	Q96T60	Bifunctional polynucleotide phosphatase/kinase OS=Homo sapiens GN=PNKP PE=1 SV=1	0.993	1.53551	1	1	1	521	57	2.06	1
Medium	E9PF49	NADH dehydrogenase [ubiquinone] 1 beta subcomplex subunit 9 OS=Homo sapiens GN=NDUFB9 PE=1 SV=1	0.992	8.59729	1	1	1	221	26.6	3.2	1
Medium	Q6YL39	Putative uncharacterized protein OS=Homo sapiens PE=2 SV=1	0.992	4.19948	1	1	1	381	41.4	2.57	1
Medium	Q15149	Plectin OS=Homo sapiens GN=PLEC PE=1 SV=3	0.985	0.256191	1	1	1	4684	531.5	2.94	1
Medium	Q7L4I2	Arginine/serine-rich coiled-coil protein 2 OS=Homo sapiens GN=RSRC2 PE=1 SV=1	0.985	5.06912	1	1	1	434	50.5	4.11	1
Medium	A0A024R5X2	HCG2001986, isoform CRA_a OS=Homo sapiens GN=hCG_2001986 PE=4 SV=1	0.977	3.11111	1	1	1	450	49.9	2.86	1
Medium	Q59E89	DnaJ (Hsp40) homolog, subfamily B, member 4 variant (Fragment) OS=Homo sapiens PE=2 SV=1	0.967	2.90698	1	1	1	344	38.6	2.48	1
Medium	Q96DV4	39S ribosomal protein L38, mitochondrial OS=Homo sapiens GN=MRPL38 PE=1 SV=2	0.963	1.84211	1	1	1	380	44.6	2.17	1
Medium	Q9UBU8	Mortality factor 4-like protein 1 OS=Homo sapiens GN=MORF4L1 PE=1 SV=2	0.963	2.20994	1	1	1	362	41.4	2.08	1
Medium	Q1T7F6	Zinc finger protein 534 OS=Homo sapiens GN=ZNF534 PE=2 SV=1	0.957	10	1	1	1	150	16.4	3.27	1
Medium	Q9HCC0	Methylcrotonoyl-CoA carboxylase beta chain, mitochondrial OS=Homo sapiens GN=MCCC2 PE=1 SV=1	0.956	3.73002	1	1	1	563	61.3	3.43	1
Medium	H3BND4	Pyridoxal-dependent decarboxylase domain-containing protein 1 OS=Homo sapiens GN=PDXDC1 PE=1 SV=1	0.953	1.86104	1	1	1	806	88.7	2.78	1
Medium	L0R4X4	Alternative protein EHBP1L1 OS=Homo sapiens GN=EHBP1L1 PE=4 SV=1	0.945	12.3967	1	1	1	121	14.1	2.92	1
Medium	A8K337	cDNA FLJ77862, highly similar to Homo sapiens catechol-O-methyltransferase domain containing 1 (COMTD1), mRNA OS=Homo sapiens PE=2 SV=1	0.941	3.43511	1	1	1	262	28.8	2.41	1
Medium	B2RDI6	cDNA, FLJ96628, highly similar to Homo sapiens mitogen-activated protein kinase kinase kinase 11(MAP3K11), mRNA OS=Homo sapiens PE=2 SV=1	0.934	1.77096	1	1	1	847	92.6	2.77	1
Medium	A8K5C7	cDNA FLJ77536, highly similar to Homo sapiens zinc finger protein 136 (clone pHZ-20) (ZNF136), mRNA OS=Homo sapiens PE=2 SV=1	0.923	5.55556	1	1	1	540	62.8	4.21	1
Medium	Q9UBC1	NF-kappa-B inhibitor-like protein 1 OS=Homo sapiens GN=NFKBIL1 PE=1 SV=1	0.922	3.67454	1	1	1	381	43.2	3.58	1
Medium	H9STE0	Cytochrome c oxidase subunit 2 OS=Homo sapiens GN=COX2 PE=3 SV=1	0.92	4.329	1	1	1	231	25.9	2.67	1
Medium	Q96TA2	ATP-dependent zinc metalloprotease YME1L1 OS=Homo sapiens GN=YME1L1 PE=1 SV=2	0.918	1.55239	1	1	1	773	86.4	3.03	1
Medium	Q8N1G4	Leucine-rich repeat-containing protein 47 OS=Homo sapiens GN=LRRC47 PE=1 SV=1	0.912	3.08748	1	1	1	583	63.4	3.63	1
Medium	Q5QPA5	28S ribosomal protein S18a, mitochondrial (Fragment) OS=Homo sapiens GN=MRPS18A PE=1 SV=9	0.911	3.42205	1	1	1	263	29.6	2.75	1
Medium	Q14204	Cytoplasmic dynein 1 heavy chain 1 OS=Homo sapiens GN=DYNC1H1 PE=1 SV=5	0.91	0.301334	1	1	1	4646	532.1	3.07	1
Medium	P13995	Bifunctional methylenetetrahydrofolate dehydrogenase/cyclohydrolase, mitochondrial OS=Homo sapiens GN=MTHFD2 PE=1 SV=2	0.907	3.14286	1	1	1	350	37.9	3.32	1
Medium	Q9H7D0	Dedicator of cytokinesis protein 5 OS=Homo sapiens GN=DOCK5 PE=1 SV=3	0.902	0.588235	1	1	1	1870	215.2	1.69	1

## Sheet: HeLa Trypsin Repl 1
Protein FDR Confidence	UniProt ID	Description	Sum PEP Score	Coverage	# Peptides	# PSMs	# Unique Peptides	# AAs	MW [kDa]	Score Sequest HT	# Peptides Sequest HT
High	P49327	Fatty acid synthase OS=Homo sapiens GN=FASN PE=1 SV=3	177.472	34.329	65	140	65	2511	273.3	500.95	65
High	H6VRG1	Keratin 1 OS=Homo sapiens GN=KRT1 PE=3 SV=1	127.031	55.814	38	258	33	645	66.1	978.77	38
High	P35908	Keratin, type II cytoskeletal 2 epidermal OS=Homo sapiens GN=KRT2 PE=1 SV=2	118.836	65.8842	33	180	27	639	65.4	667.52	33
High	P35527	Keratin, type I cytoskeletal 9 OS=Homo sapiens GN=KRT9 PE=1 SV=3	117.563	74.6388	35	231	34	623	62	856.59	35
High	P68371	Tubulin beta-4B chain OS=Homo sapiens GN=TUBB4B PE=1 SV=1	116.729	80	26	204	1	445	49.8	723.17	26
High	P21333	Filamin-A OS=Homo sapiens GN=FLNA PE=1 SV=4	115.556	25.9539	42	79	42	2647	280.6	315	42
High	P07437	Tubulin beta chain OS=Homo sapiens GN=TUBB PE=1 SV=2	115.092	80.1802	26	195	5	444	49.6	691.48	26
High	A0A024R321	Filamin B, beta (Actin binding protein 278), isoform CRA_a OS=Homo sapiens GN=FLNB PE=4 SV=1	114.162	28.6804	46	86	44	2622	280.3	320.19	46
High	P13645	Keratin, type I cytoskeletal 10 OS=Homo sapiens GN=KRT10 PE=1 SV=6	113.192	53.4247	33	198	27	584	58.8	683.27	33
High	Q05BQ2	TIPARP protein (Fragment) OS=Homo sapiens GN=TIPARP PE=2 SV=1	100.299	34.0909	22	131	22	660	76.6	470.7	22
High	Q13885	Tubulin beta-2A chain OS=Homo sapiens GN=TUBB2A PE=1 SV=1	97.93	62.4719	23	163	4	445	49.9	582.89	23
High	P04350	Tubulin beta-4A chain OS=Homo sapiens GN=TUBB4A PE=1 SV=2	97.346	70.7207	23	172	2	444	49.6	598.17	23
High	Q14204	Cytoplasmic dynein 1 heavy chain 1 OS=Homo sapiens GN=DYNC1H1 PE=1 SV=5	92.662	11.1709	40	63	40	4646	532.1	212.83	40
High	P07900	Heat shock protein HSP 90-alpha OS=Homo sapiens GN=HSP90AA1 PE=1 SV=5	82.688	43.4426	27	58	17	732	84.6	204.85	27
High	P08779	Keratin, type I cytoskeletal 16 OS=Homo sapiens GN=KRT16 PE=1 SV=4	75.836	53.9112	25	117	14	473	51.2	394.71	25
High	B2RBD5	Tubulin beta chain OS=Homo sapiens PE=2 SV=1	75.342	40.2222	19	141	2	450	50.4	496.89	19
High	P02533	Keratin, type I cytoskeletal 14 OS=Homo sapiens GN=KRT14 PE=1 SV=4	73.909	52.3305	23	132	10	472	51.5	451.79	23
High	P13647	Keratin, type II cytoskeletal 5 OS=Homo sapiens GN=KRT5 PE=1 SV=3	72.605	46.1017	26	121	17	590	62.3	379.68	26
High	V9HWB8	Pyruvate kinase OS=Homo sapiens GN=HEL-S-30 PE=1 SV=1	72.088	52.7307	22	47	22	531	57.9	188.74	22
High	Q86YZ3	Hornerin OS=Homo sapiens GN=HRNR PE=1 SV=2	67.074	26	21	65	21	2850	282.2	253.08	21
High	Q1ZYQ1	Tubulin alpha chain OS=Homo sapiens GN=TUBA2 PE=2 SV=1	66.789	54.8889	18	66	3	450	49.9	225.3	18
High	F5H5D3	Tubulin alpha chain OS=Homo sapiens GN=TUBA1C PE=1 SV=1	66.731	49.1329	19	71	4	519	57.7	241.48	19
High	P27708	CAD protein OS=Homo sapiens GN=CAD PE=1 SV=3	66.659	18.2022	24	38	24	2225	242.8	149.08	24
High	P08238	Heat shock protein HSP 90-beta OS=Homo sapiens GN=HSP90AB1 PE=1 SV=4	64.828	36.326	22	49	12	724	83.2	170.37	22
High	A0A024R454	Carbamoyl-phosphate synthetase 1, mitochondrial, isoform CRA_a OS=Homo sapiens GN=CPS1 PE=3 SV=1	63.289	25.8667	25	37	25	1500	164.8	134.53	25
High	P68366	Tubulin alpha-4A chain OS=Homo sapiens GN=TUBA4A PE=1 SV=1	62.496	53.3482	17	61	4	448	49.9	201.58	17
High	Q9BUF5	Tubulin beta-6 chain OS=Homo sapiens GN=TUBB6 PE=1 SV=1	62.248	54.0359	19	80	8	446	49.8	257.01	19
High	E9PMT2	LIM domain only protein 7 OS=Homo sapiens GN=LMO7 PE=1 SV=1	58.683	23.8913	21	42	2	1398	159.9	160.73	21
High	E9PMS6	LIM domain only protein 7 OS=Homo sapiens GN=LMO7 PE=1 SV=1	58.402	25.8824	20	42	1	1275	145.3	164.57	20
High	V9HW22	Epididymis luminal protein 33 OS=Homo sapiens GN=HEL-S-72p PE=2 SV=1	57.049	38.3901	20	39	12	646	70.9	140.86	20
High	Q9Y490	Talin-1 OS=Homo sapiens GN=TLN1 PE=1 SV=3	56.979	13.0657	21	28	21	2541	269.6	111.5	21
High	P63261	Actin, cytoplasmic 2 OS=Homo sapiens GN=ACTG1 PE=1 SV=1	56.629	59.4667	15	38	8	375	41.8	127.63	15
High	P04259	Keratin, type II cytoskeletal 6B OS=Homo sapiens GN=KRT6B PE=1 SV=5	51.07	37.234	23	94	4	564	60	286.41	23
High	P07814	Bifunctional glutamate/proline--tRNA ligase OS=Homo sapiens GN=EPRS PE=1 SV=5	51.004	19.3122	20	26	20	1512	170.5	93.31	20
High	A0A024R1A3	Testicular secretory protein Li 63 OS=Homo sapiens GN=UBE1 PE=2 SV=1	50.965	25.6144	19	35	19	1058	117.8	132.33	19
High	A0A024R9W5	HECT, UBA and WWE domain containing 1, isoform CRA_b OS=Homo sapiens GN=HUWE1 PE=4 SV=1	50.677	7.20165	20	28	20	4374	481.6	109.58	20
High	A0A0S2Z428	HCG2039812, isoform CRA_b (Fragment) OS=Homo sapiens GN=KRT6A PE=2 SV=1	49.328	35.461	22	92	3	564	60	284.55	22
High	A4QPB0	IQ motif containing GTPase activating protein 1 OS=Homo sapiens GN=IQGAP1 PE=1 SV=1	49.254	16.898	18	27	18	1657	189.2	103.61	18
High	P13639	Elongation factor 2 OS=Homo sapiens GN=EEF2 PE=1 SV=4	45.964	25.9907	19	37	19	858	95.3	123.86	19
High	P35579	Myosin-9 OS=Homo sapiens GN=MYH9 PE=1 SV=4	45.956	12.8061	16	18	16	1960	226.4	71.52	16
High	P04406	Glyceraldehyde-3-phosphate dehydrogenase OS=Homo sapiens GN=GAPDH PE=1 SV=3	43.409	44.7761	12	33	12	335	36	136.87	12
High	Q04695	Keratin, type I cytoskeletal 17 OS=Homo sapiens GN=KRT17 PE=1 SV=2	42.85	42.8241	18	64	10	432	48.1	194.07	18
High	B7Z809	cDNA FLJ56016, highly similar to C-1-tetrahydrofolate synthase, cytoplasmic OS=Homo sapiens PE=2 SV=1	42.339	21.8627	16	29	16	1020	110.4	104.91	16
High	A0A087WVQ6	Clathrin heavy chain OS=Homo sapiens GN=CLTC PE=1 SV=1	41.093	12.7457	13	13	13	1679	191.9	59.37	13
High	P15924	Desmoplakin OS=Homo sapiens GN=DSP PE=1 SV=3	39.106	7.83699	18	38	18	2871	331.6	122.44	18
High	P12268	Inosine-5'-monophosphate dehydrogenase 2 OS=Homo sapiens GN=IMPDH2 PE=1 SV=2	36.228	35.7977	13	22	12	514	55.8	84.44	13
High	P00558	Phosphoglycerate kinase 1 OS=Homo sapiens GN=PGK1 PE=1 SV=3	33.743	36.9305	12	20	12	417	44.6	69.37	12
High	P68104	Elongation factor 1-alpha 1 OS=Homo sapiens GN=EEF1A1 PE=1 SV=1	33.072	31.6017	11	31	11	462	50.1	110.24	11
High	Q4LE36	ACLY variant protein (Fragment) OS=Homo sapiens GN=ACLY variant protein PE=2 SV=1	32.95	18.1179	15	16	15	1137	124.5	57.91	15
High	P10809	60 kDa heat shock protein, mitochondrial OS=Homo sapiens GN=HSPD1 PE=1 SV=2	29.895	30.192	9	13	9	573	61	57.07	9
High	A0A0S2Z410	Hydroxysteroid dehydrogenase 10 isoform 1 (Fragment) OS=Homo sapiens GN=HSD17B10 PE=2 SV=1	29.837	50.5747	8	12	8	261	26.9	55.02	8
High	P29401	Transketolase OS=Homo sapiens GN=TKT PE=1 SV=3	29.023	29.374	11	24	11	623	67.8	94.91	11
High	Q59EJ3	Heat shock 70kDa protein 1A variant (Fragment) OS=Homo sapiens PE=2 SV=1	28.888	21.7207	10	23	4	709	77.4	83.7	10
High	P54652	Heat shock-related 70 kDa protein 2 OS=Homo sapiens GN=HSPA2 PE=1 SV=1	27.493	16.2754	9	23	1	639	70	82.39	9
High	B4DI54	cDNA FLJ56386, highly similar to Heat shock 70 kDa protein 1L OS=Homo sapiens PE=2 SV=1	24.425	16.4539	8	30	1	705	77.5	103.51	8
High	V9HWB4	Epididymis secretory sperm binding protein Li 89n OS=Homo sapiens GN=HEL-S-89n PE=2 SV=1	24.333	17.4312	9	14	7	654	72.3	49.26	9
High	P04075	Fructose-bisphosphate aldolase A OS=Homo sapiens GN=ALDOA PE=1 SV=2	24.051	34.6154	8	14	8	364	39.4	52.87	8
High	B5BU38	Annexin OS=Homo sapiens GN=ANXA1 PE=2 SV=1	23.786	31.5029	9	12	9	346	38.7	44.79	9
High	A8K3K1	cDNA FLJ78096, highly similar to Homo sapiens actin, alpha, cardiac muscle (ACTC), mRNA OS=Homo sapiens PE=2 SV=1	23.619	24.9337	8	26	1	377	42	77.46	8
High	B2RCM2	cDNA, FLJ96156, highly similar to Homo sapiens leucyl-tRNA synthetase (LARS), mRNA OS=Homo sapiens PE=2 SV=1	23.571	11.8197	11	13	11	1176	134.4	46.37	11
High	Q7Z2W4	Zinc finger CCCH-type antiviral protein 1 OS=Homo sapiens GN=ZC3HAV1 PE=1 SV=3	23.223	14.8559	9	21	9	902	101.4	71.83	9
High	B2R704	cDNA, FLJ93207, highly similar to Homo sapiens microtubule-associated protein 7 (MAP7), mRNA OS=Homo sapiens PE=2 SV=1	22.329	20.9613	9	14	9	749	83.9	48.59	9
High	V9HW43	Epididymis secretory protein Li 102 OS=Homo sapiens GN=HEL-S-102 PE=2 SV=1	22.012	44.878	7	10	7	205	22.8	40.39	7
High	Q02413	Desmoglein-1 OS=Homo sapiens GN=DSG1 PE=1 SV=2	20.602	10.9628	8	19	8	1049	113.7	63.63	8
High	P00338	L-lactate dehydrogenase A chain OS=Homo sapiens GN=LDHA PE=1 SV=2	20.209	27.4096	9	31	8	332	36.7	94.8	9
High	Q59HH3	Trifunctional purine biosynthetic protein adenosine-3 (Fragment) OS=Homo sapiens PE=2 SV=1	19.651	13.1931	8	10	8	1046	112.1	39.91	8
High	A0A024R1X8	Junction plakoglobin, isoform CRA_a OS=Homo sapiens GN=JUP PE=4 SV=1	19.325	13.9597	9	13	9	745	81.7	41.59	9
High	A1A4E9	Keratin 13 OS=Homo sapiens GN=KRT13 PE=2 SV=1	18.516	18.9956	10	33	5	458	49.6	107.72	10
High	Q59G75	Isoleucyl-tRNA synthetase, cytoplasmic variant (Fragment) OS=Homo sapiens PE=2 SV=1	18.253	6.64582	7	7	1	1279	146.3	25.67	7
High	P26639	Threonine--tRNA ligase, cytoplasmic OS=Homo sapiens GN=TARS PE=1 SV=3	18.235	16.4592	8	10	8	723	83.4	34.35	8
High	J3KN16	Proteasome-associated protein ECM29 homolog OS=Homo sapiens GN=KIAA0368 PE=1 SV=1	18.16	4.61081	6	6	6	2017	223.6	26.48	6
High	A0A024RAM0	Transportin 1, isoform CRA_a OS=Homo sapiens GN=TNPO1 PE=4 SV=1	17.938	12.1381	9	9	9	898	102.3	28.83	9
High	Q7Z355	Putative uncharacterized protein DKFZp686L17145 OS=Homo sapiens GN=DKFZp686L17145 PE=2 SV=1	17.683	8.15972	7	7	1	1152	131.6	26.64	7
High	H0Y8C6	Importin-5 (Fragment) OS=Homo sapiens GN=IPO5 PE=1 SV=1	16.64	6.27843	6	6	6	1099	123.8	21.4	6
High	Q5T4S7	E3 ubiquitin-protein ligase UBR4 OS=Homo sapiens GN=UBR4 PE=1 SV=1	16.473	2.68184	7	7	7	5183	573.5	28.89	7
High	Q14257	Reticulocalbin-2 OS=Homo sapiens GN=RCN2 PE=1 SV=1	16.398	21.4511	5	5	5	317	36.9	22.07	5
High	P06733	Alpha-enolase OS=Homo sapiens GN=ENO1 PE=1 SV=2	16.135	21.1982	6	9	6	434	47.1	38.72	6
High	P49588	Alanine--tRNA ligase, cytoplasmic OS=Homo sapiens GN=AARS PE=1 SV=2	16.072	7.74793	5	10	5	968	106.7	35.37	5
High	Q5EC54	Heterogeneous nuclear ribonucleoprotein K transcript variant OS=Homo sapiens GN=HNRPK PE=2 SV=1	15.939	19.8276	6	8	6	464	51	32.86	6
High	P05089	Arginase-1 OS=Homo sapiens GN=ARG1 PE=1 SV=2	15.801	18.6335	5	8	5	322	34.7	26.79	5
High	A0A1B0GUN5	Pleckstrin homology domain-containing family A member 6 OS=Homo sapiens GN=PLEKHA6 PE=1 SV=1	15.735	10.7509	8	9	8	1172	131.2	28.56	8
High	A8K8K1	cDNA FLJ76936, highly similar to Homo sapiens RNA terminal phosphate cyclase domain 1 (RTCD1), mRNA OS=Homo sapiens PE=2 SV=1	15.404	22.6776	6	10	6	366	39.3	37.91	6
High	P55060	Exportin-2 OS=Homo sapiens GN=CSE1L PE=1 SV=3	15.381	9.88671	7	10	7	971	110.3	35.81	7
High	O95373	Importin-7 OS=Homo sapiens GN=IPO7 PE=1 SV=1	15.275	7.99615	6	6	6	1038	119.4	23.61	6
High	P23921	Ribonucleoside-diphosphate reductase large subunit OS=Homo sapiens GN=RRM1 PE=1 SV=1	15.16	9.09091	6	8	6	792	90	28.34	6
High	P78527	DNA-dependent protein kinase catalytic subunit OS=Homo sapiens GN=PRKDC PE=1 SV=3	15.082	2.15601	7	8	7	4128	468.8	25.57	7
High	B2RBR9	cDNA, FLJ95650, highly similar to Homo sapiens karyopherin (importin) beta 1 (KPNB1), mRNA OS=Homo sapiens PE=2 SV=1	14.932	7.42009	5	9	5	876	97.1	31.83	5
High	A0A024R8A2	GTPase activating protein and VPS9 domains 1, isoform CRA_d OS=Homo sapiens GN=GAPVD1 PE=4 SV=1	14.747	5.31271	5	6	5	1487	166.1	23.42	5
High	A0A087X1N8	Serpin B6 OS=Homo sapiens GN=SERPINB6 PE=1 SV=1	14.674	21.2658	7	8	7	395	44.8	27.04	7
High	A0A0D9SF53	ATP-dependent RNA helicase DDX3X OS=Homo sapiens GN=DDX3X PE=1 SV=1	14.486	11.4598	7	10	6	733	81.4	34.78	7
High	Q9Y446	Plakophilin-3 OS=Homo sapiens GN=PKP3 PE=1 SV=1	14.21	11.6688	6	7	6	797	87	24.56	6
High	Q4LE58	eIF4G1 variant protein (Fragment) OS=Homo sapiens GN=EIF4G1 variant protein PE=2 SV=1	14.153	6.21921	6	6	6	1624	178	26.28	6
High	P60174	Triosephosphate isomerase OS=Homo sapiens GN=TPI1 PE=1 SV=3	13.607	20.979	4	6	4	286	30.8	26.18	4
High	E1NZA1	Peroxisome proliferator activated receptor interacting complex protein OS=Homo sapiens GN=PRIC295 PE=2 SV=1	13.511	3.51928	7	7	7	2671	292.6	25.7	7
High	P09874	Poly [ADP-ribose] polymerase 1 OS=Homo sapiens GN=PARP1 PE=1 SV=4	13.506	7.49507	6	9	6	1014	113	26.88	6
High	P07195	L-lactate dehydrogenase B chain OS=Homo sapiens GN=LDHB PE=1 SV=2	13.297	19.7605	6	17	5	334	36.6	54.09	6
High	P05787	Keratin, type II cytoskeletal 8 OS=Homo sapiens GN=KRT8 PE=1 SV=7	13.136	13.6646	6	20	3	483	53.7	65.01	6
High	P07737	Profilin-1 OS=Homo sapiens GN=PFN1 PE=1 SV=2	13.127	48.5714	5	8	5	140	15	32.63	5
High	P58107	Epiplakin OS=Homo sapiens GN=EPPK1 PE=1 SV=2	12.911	7.32809	4	4	4	5090	555.3	19.68	4
High	O14980	Exportin-1 OS=Homo sapiens GN=XPO1 PE=1 SV=1	12.855	6.90943	6	6	6	1071	123.3	20.82	6
High	Q93008	Probable ubiquitin carboxyl-terminal hydrolase FAF-X OS=Homo sapiens GN=USP9X PE=1 SV=3	12.721	2.72374	6	6	6	2570	292.1	19.54	6
High	A8K690	cDNA FLJ76863, highly similar to Homo sapiens stress-induced-phosphoprotein 1 (Hsp70/Hsp90-organizing protein) (STIP1), mRNA OS=Homo sapiens PE=2 SV=1	12.667	18.6004	8	9	8	543	62.6	29.08	8
High	V9HW88	Calreticulin, isoform CRA_b OS=Homo sapiens GN=HEL-S-99n PE=2 SV=1	12.664	21.5827	4	4	4	417	48.1	17.39	4
High	A0A024R5Z7	Annexin OS=Homo sapiens GN=ANXA2 PE=3 SV=1	12.649	19.469	6	12	6	339	38.6	37.31	6
High	Q96PK6	RNA-binding protein 14 OS=Homo sapiens GN=RBM14 PE=1 SV=2	12.631	12.855	6	12	6	669	69.4	42.76	6
High	A8K492	cDNA FLJ76789, highly similar to Homo sapiens methionine-tRNA synthetase (MARS), mRNA OS=Homo sapiens PE=2 SV=1	12.252	5.88889	3	3	3	900	101.1	14.83	3
High	A8K486	Peptidyl-prolyl cis-trans isomerase OS=Homo sapiens PE=2 SV=1	12.23	43.0303	6	7	6	165	18	23.72	6
High	A0A024R8S5	Protein disulfide-isomerase OS=Homo sapiens GN=P4HB PE=2 SV=1	11.989	10.8268	4	8	4	508	57.1	30.42	4
High	Q59GY2	Ribosomal protein L4 variant (Fragment) OS=Homo sapiens PE=2 SV=1	11.965	14.5125	5	5	5	441	49	16.34	5
High	P04040	Catalase OS=Homo sapiens GN=CAT PE=1 SV=3	11.82	8.15939	3	5	3	527	59.7	18.72	3
High	P62280	40S ribosomal protein S11 OS=Homo sapiens GN=RPS11 PE=1 SV=3	11.809	24.6835	3	10	3	158	18.4	31.61	3
High	P63104	14-3-3 protein zeta/delta OS=Homo sapiens GN=YWHAZ PE=1 SV=1	11.738	22.8571	5	8	3	245	27.7	26.67	5
High	A0A087X2H1	E3 ubiquitin-protein ligase HECTD1 OS=Homo sapiens GN=HECTD1 PE=1 SV=1	11.647	2.63963	4	5	4	2614	289.5	20.23	4
High	Q14240	Eukaryotic initiation factor 4A-II OS=Homo sapiens GN=EIF4A2 PE=1 SV=2	11.584	13.0221	4	4	4	407	46.4	14.92	4
High	Q01813	ATP-dependent 6-phosphofructokinase, platelet type OS=Homo sapiens GN=PFKP PE=1 SV=2	11.408	8.03571	4	5	3	784	85.5	19.61	4
High	P27635	60S ribosomal protein L10 OS=Homo sapiens GN=RPL10 PE=1 SV=4	11.4	28.0374	4	5	4	214	24.6	17.25	4
High	Q16658	Fascin OS=Homo sapiens GN=FSCN1 PE=1 SV=3	11.387	13.1846	4	5	4	493	54.5	20.86	4
High	P34932	Heat shock 70 kDa protein 4 OS=Homo sapiens GN=HSPA4 PE=1 SV=4	11.372	8.80952	5	8	5	840	94.3	31.45	5
High	P31689	DnaJ homolog subfamily A member 1 OS=Homo sapiens GN=DNAJA1 PE=1 SV=2	11.363	16.1209	4	7	4	397	44.8	27.17	4
High	Q13085	Acetyl-CoA carboxylase 1 OS=Homo sapiens GN=ACACA PE=1 SV=2	11.347	3.15431	5	5	5	2346	265.4	18.76	5
High	Q562R1	Beta-actin-like protein 2 OS=Homo sapiens GN=ACTBL2 PE=1 SV=2	11.247	14.8936	4	9	1	376	42	28.15	4
High	A8K3A8	cDNA FLJ75085, highly similar to Homo sapiens glutaminyl-tRNA synthetase (QARS), mRNA OS=Homo sapiens PE=2 SV=1	11.118	7.35484	4	5	4	775	87.8	18.59	4
High	B4DPP6	cDNA FLJ54371, highly similar to Serum albumin OS=Homo sapiens PE=2 SV=1	10.98	5.50162	4	21	4	618	70.3	58.97	4
High	B5ME19	Eukaryotic translation initiation factor 3 subunit C-like protein OS=Homo sapiens GN=EIF3CL PE=3 SV=1	10.817	7.22101	6	7	6	914	105.4	21.76	6
High	Q00839	Heterogeneous nuclear ribonucleoprotein U OS=Homo sapiens GN=HNRNPU PE=1 SV=6	10.745	10.5455	4	7	4	825	90.5	26.37	4
High	E9PK25	Cofilin-1 OS=Homo sapiens GN=CFL1 PE=1 SV=1	10.573	22.0588	3	4	3	204	22.7	18.19	3
High	Q0IIN1	Keratin 77 OS=Homo sapiens GN=KRT77 PE=1 SV=1	10.287	7.26644	4	27	1	578	61.8	92.52	4
High	B2R4R0	Histone H4 OS=Homo sapiens GN=HIST1H4J PE=2 SV=1	10.25	42.7184	5	11	5	103	11.4	37.42	5
High	B4DJ30	cDNA FLJ61290, highly similar to Neutral alpha-glucosidase AB OS=Homo sapiens PE=2 SV=1	10.057	6.23116	4	5	4	995	112.9	18.38	4
High	A8K3C3	T-complex protein 1 subunit delta OS=Homo sapiens PE=2 SV=1	10.049	11.3173	5	5	5	539	57.9	15.96	5
High	Q32Q12	Nucleoside diphosphate kinase OS=Homo sapiens GN=NME1-NME2 PE=1 SV=1	9.954	31.1644	4	9	4	292	32.6	29.25	4
High	P30101	Protein disulfide-isomerase A3 OS=Homo sapiens GN=PDIA3 PE=1 SV=4	9.885	12.2772	4	6	4	505	56.7	21.11	4
High	A8K8U1	cDNA FLJ77762, highly similar to Homo sapiens cullin-associated and neddylation-dissociated 1 (CAND1), mRNA OS=Homo sapiens PE=2 SV=1	9.781	3.82114	4	4	4	1230	136.2	14.43	4
High	P19013	Keratin, type II cytoskeletal 4 OS=Homo sapiens GN=KRT4 PE=1 SV=4	9.493	9.55056	5	18	1	534	57.3	45.37	5
High	B3KMS0	Condensin complex subunit 1 OS=Homo sapiens PE=2 SV=1	9.371	3.56888	3	3	3	1401	157.1	13.27	3
High	B3KMQ6	cDNA FLJ12172 fis, clone MAMMA1000684, highly similar to Opioid growth factor receptor OS=Homo sapiens PE=2 SV=1	9.291	10.9306	5	6	5	677	73.3	19.85	5
High	Q59H77	T-complex protein 1 subunit gamma (Fragment) OS=Homo sapiens PE=2 SV=1	9.154	9.18544	3	3	3	577	63.5	12.27	3
High	V9HWC7	Epididymis secretory sperm binding protein Li 128m OS=Homo sapiens GN=HEL-S-128m PE=2 SV=1	9.104	22.7679	4	5	4	224	25	15.74	4
High	A8KAP9	cDNA FLJ78448, highly similar to Homo sapiens argininosuccinate synthetase (ASS), transcript variant 1, mRNA OS=Homo sapiens PE=2 SV=1	9.017	11.8932	3	3	3	412	46.5	13.03	3
High	Q13835	Plakophilin-1 OS=Homo sapiens GN=PKP1 PE=1 SV=2	8.986	6.0241	3	10	3	747	82.8	37.41	3
High	Q8N1C8	HSPA9 protein (Fragment) OS=Homo sapiens GN=HSPA9 PE=2 SV=1	8.919	6.60793	3	5	3	681	73.8	21.08	3
High	B2R9K8	cDNA, FLJ94440, highly similar to Homo sapiens chaperonin containing TCP1, subunit 6A (zeta 1)(CCT6A), mRNA OS=Homo sapiens PE=2 SV=1	8.827	9.4162	4	4	4	531	57.9	15.64	4
High	A0A0S2Z471	Creatine kinase brain isoform 2 (Fragment) OS=Homo sapiens GN=CKB PE=2 SV=1	8.716	11.8519	3	3	3	405	44.9	13.45	3
High	A0A087WUZ3	Spectrin beta chain, non-erythrocytic 1 OS=Homo sapiens GN=SPTBN1 PE=1 SV=1	8.69	1.73288	3	3	3	2366	274.7	11.89	3
High	Q08554	Desmocollin-1 OS=Homo sapiens GN=DSC1 PE=1 SV=2	8.68	6.59955	4	5	4	894	99.9	18.46	4
High	Q15293	Reticulocalbin-1 OS=Homo sapiens GN=RCN1 PE=1 SV=1	8.627	15.1057	3	5	3	331	38.9	18.25	3
High	P52209	6-phosphogluconate dehydrogenase, decarboxylating OS=Homo sapiens GN=PGD PE=1 SV=3	8.624	11.5942	3	5	3	483	53.1	18.34	3
High	A8K3H8	cDNA FLJ77680, highly similar to Homo sapiens protein phosphatase 2 (formerly 2A), regulatory subunit A (PR 65), alpha isoform (PPP2R1A), mRNA OS=Homo sapiens PE=2 SV=1	8.619	7.13073	3	3	3	589	65.3	11.73	3
High	B3KUY2	Prostaglandin E synthase 3 (Cytosolic), isoform CRA_c OS=Homo sapiens GN=PTGES3 PE=2 SV=1	8.449	18.1818	2	4	2	165	19.4	13.93	2
High	Q8N1N4	Keratin, type II cytoskeletal 78 OS=Homo sapiens GN=KRT78 PE=2 SV=2	8.426	9.42308	5	7	3	520	56.8	19.77	5
High	Q5D862	Filaggrin-2 OS=Homo sapiens GN=FLG2 PE=1 SV=1	8.363	2.63488	4	11	4	2391	247.9	40.78	4
High	P30044	Peroxiredoxin-5, mitochondrial OS=Homo sapiens GN=PRDX5 PE=1 SV=4	8.279	19.6262	3	3	3	214	22.1	11.14	3
High	A8K9U0	cDNA FLJ78260, highly similar to Homo sapiens RNA binding motif protein 4, mRNA OS=Homo sapiens PE=2 SV=1	8.257	20.6044	5	8	5	364	40.3	25.16	5
High	Q53SS8	Epididymis secretory protein Li 85 OS=Homo sapiens GN=PCBP1 PE=2 SV=1	8.171	13.2022	3	9	2	356	37.5	34.12	3
High	E9PAU2	Ribonucleoprotein PTB-binding 1 OS=Homo sapiens GN=RAVER1 PE=1 SV=1	8.082	5.68783	2	2	2	756	79.5	9.86	2
High	P23526	Adenosylhomocysteinase OS=Homo sapiens GN=AHCY PE=1 SV=4	7.998	8.10185	3	5	3	432	47.7	18.24	3
High	E5KNY5	Leucine-rich PPR-motif containing OS=Homo sapiens GN=LRPPRC PE=4 SV=1	7.975	3.22812	3	3	3	1394	157.8	11.45	3
High	Q9NR09	Baculoviral IAP repeat-containing protein 6 OS=Homo sapiens GN=BIRC6 PE=1 SV=2	7.936	1.15298	4	4	4	4857	529.9	12.82	4
High	P62701	40S ribosomal protein S4, X isoform OS=Homo sapiens GN=RPS4X PE=1 SV=2	7.898	18.251	4	5	4	263	29.6	17.87	4
High	A0A024RBB7	Nucleosome assembly protein 1-like 1, isoform CRA_a OS=Homo sapiens GN=NAP1L1 PE=3 SV=1	7.895	8.95141	2	2	2	391	45.3	10.09	2
High	Q5JR94	40S ribosomal protein S8 OS=Homo sapiens GN=RPS8 PE=2 SV=1	7.86	19.7115	4	6	4	208	24.2	18.33	4
High	P78371	T-complex protein 1 subunit beta OS=Homo sapiens GN=CCT2 PE=1 SV=4	7.791	10.4673	3	3	3	535	57.5	13.09	3
High	A0A024R4K3	Malate dehydrogenase OS=Homo sapiens GN=MDH2 PE=2 SV=1	7.743	11.8343	3	3	3	338	35.5	10.64	3
High	P48594	Serpin B4 OS=Homo sapiens GN=SERPINB4 PE=1 SV=2	7.739	12.0513	3	3	3	390	44.8	11.66	3
High	P50990	T-complex protein 1 subunit theta OS=Homo sapiens GN=CCT8 PE=1 SV=4	7.714	9.12409	4	5	4	548	59.6	18.02	4
High	P54136	Arginine--tRNA ligase, cytoplasmic OS=Homo sapiens GN=RARS PE=1 SV=2	7.54	6.06061	3	3	3	660	75.3	10.45	3
High	P39687	Acidic leucine-rich nuclear phosphoprotein 32 family member A OS=Homo sapiens GN=ANP32A PE=1 SV=1	7.538	8.43373	2	2	2	249	28.6	8.41	2
High	B2R4P2	cDNA, FLJ92164, highly similar to Homo sapiens peroxiredoxin 1 (PRDX1), mRNA OS=Homo sapiens PE=2 SV=1	7.521	18.593	3	5	3	199	22.2	15.81	3
High	Q99497	Protein deglycase DJ-1 OS=Homo sapiens GN=PARK7 PE=1 SV=2	7.484	29.6296	3	3	3	189	19.9	12.76	3
High	J3KNR0	Non-specific serine/threonine protein kinase OS=Homo sapiens GN=MARK3 PE=1 SV=2	7.449	5.92784	3	4	3	776	86.9	14.6	3
High	Q15366	Poly(rC)-binding protein 2 OS=Homo sapiens GN=PCBP2 PE=1 SV=1	7.151	12.8767	3	5	2	365	38.6	20.7	3
High	P36952	Serpin B5 OS=Homo sapiens GN=SERPINB5 PE=1 SV=2	7.124	8.26667	3	3	3	375	42.1	10.42	3
High	Q6ZVX7	F-box only protein 50 OS=Homo sapiens GN=NCCRP1 PE=1 SV=1	7.095	14.9091	2	2	2	275	30.8	8.83	2
High	G9K388	YWHAE/FAM22A fusion protein (Fragment) OS=Homo sapiens GN=YWHAE/FAM22A fusion PE=2 SV=1	7.094	10.1562	4	6	2	384	41.2	17.29	4
High	J3QQ67	60S ribosomal protein L18 (Fragment) OS=Homo sapiens GN=RPL18 PE=1 SV=1	7.033	19.4737	3	9	3	190	21.8	33.1	3
High	P25789	Proteasome subunit alpha type-4 OS=Homo sapiens GN=PSMA4 PE=1 SV=1	6.967	13.0268	2	2	2	261	29.5	8.72	2
High	P27348	14-3-3 protein theta OS=Homo sapiens GN=YWHAQ PE=1 SV=1	6.948	19.1837	4	8	2	245	27.7	21.6	4
High	P53621	Coatomer subunit alpha OS=Homo sapiens GN=COPA PE=1 SV=2	6.844	3.10458	3	3	3	1224	138.3	11.19	3
High	P23396	40S ribosomal protein S3 OS=Homo sapiens GN=RPS3 PE=1 SV=2	6.759	14.4033	3	8	3	243	26.7	24.94	3
High	P38159	RNA-binding motif protein, X chromosome OS=Homo sapiens GN=RBMX PE=1 SV=3	6.698	8.95141	3	3	3	391	42.3	10.5	3
High	Q14315	Filamin-C OS=Homo sapiens GN=FLNC PE=1 SV=3	6.648	1.68807	3	9	1	2725	290.8	34.11	3
High	O00299	Chloride intracellular channel protein 1 OS=Homo sapiens GN=CLIC1 PE=1 SV=4	6.496	12.4481	2	3	2	241	26.9	12.05	2
High	Q6P2H3	Centrosomal protein of 85 kDa OS=Homo sapiens GN=CEP85 PE=1 SV=1	6.465	4.19948	2	2	2	762	85.6	9.16	2
High	V9HWG3	Epididymis secretory protein Li 45 OS=Homo sapiens GN=HEL-S-45 PE=2 SV=1	6.431	8.4425	3	4	3	687	77.3	15.77	3
High	A0A024R8A7	HCG31253, isoform CRA_a OS=Homo sapiens GN=hCG_31253 PE=4 SV=1	6.31	7.69231	3	3	3	572	61.6	10.7	3
High	G9BXQ3	Tnk(C17Orf61) fusion protein OS=Homo sapiens PE=2 SV=1	6.212	7.15706	2	2	2	503	54.3	9.73	2
High	A0A0A0MTC1	E3 ubiquitin-protein ligase RNF213 OS=Homo sapiens GN=RNF213 PE=1 SV=1	6.157	0.608828	2	2	2	5256	596.1	9.12	2
High	A0A024R529	Dihydroxyacetone kinase 2 homolog (Yeast), isoform CRA_a OS=Homo sapiens GN=DAK PE=4 SV=1	6.127	4.86957	2	2	2	575	58.9	9.65	2
High	Q96P63	Serpin B12 OS=Homo sapiens GN=SERPINB12 PE=1 SV=1	6.126	11.6049	3	4	3	405	46.2	15.33	3
High	G3V5Z7	Proteasome subunit alpha type OS=Homo sapiens GN=PSMA6 PE=1 SV=1	6.101	11.5079	2	2	2	252	28.1	8.11	2
High	R9S3C3	p14ARF/p16INK4a fusion protein OS=Homo sapiens GN=p14ARF PE=2 SV=1	6.032	14.1176	2	2	2	170	18.5	6.81	2
High	A0A024RCN6	Valyl-tRNA synthetase, isoform CRA_a OS=Homo sapiens GN=VARS PE=3 SV=1	6.025	4.50949	4	5	4	1264	140.4	17.03	4
High	B2RDY9	Adenylyl cyclase-associated protein OS=Homo sapiens PE=2 SV=1	6	14.3158	3	3	3	475	51.6	13.45	3
High	Q6IPH7	RPL14 protein OS=Homo sapiens GN=RPL14 PE=1 SV=1	5.918	15	3	3	3	220	23.8	10.58	3
High	P49411	Elongation factor Tu, mitochondrial OS=Homo sapiens GN=TUFM PE=1 SV=2	5.844	7.07965	2	2	2	452	49.5	8.95	2
High	P13010	X-ray repair cross-complementing protein 5 OS=Homo sapiens GN=XRCC5 PE=1 SV=3	5.768	4.5082	2	2	2	732	82.7	7.44	2
High	O43175	D-3-phosphoglycerate dehydrogenase OS=Homo sapiens GN=PHGDH PE=1 SV=4	5.67	4.69043	2	2	2	533	56.6	7.6	2
High	Q15181	Inorganic pyrophosphatase OS=Homo sapiens GN=PPA1 PE=1 SV=2	5.662	11.0727	3	4	3	289	32.6	9.82	3
High	J3KNL6	Protein transport protein Sec16A OS=Homo sapiens GN=SEC16A PE=1 SV=1	5.661	2.16377	3	3	3	2357	251.7	11.35	3
High	A8K4D5	Kynureninase OS=Homo sapiens GN=KYNU PE=2 SV=1	5.628	5.5914	2	2	2	465	52.3	7.76	2
High	Q6UUV7	CREB-regulated transcription coactivator 3 OS=Homo sapiens GN=CRTC3 PE=1 SV=2	5.628	4.52342	2	2	2	619	66.9	8.25	2
High	P55786	Puromycin-sensitive aminopeptidase OS=Homo sapiens GN=NPEPPS PE=1 SV=2	5.613	3.69967	3	3	3	919	103.2	9.76	3
High	A0A0A0MTS2	Glucose-6-phosphate isomerase (Fragment) OS=Homo sapiens GN=GPI PE=1 SV=1	5.611	5.2356	2	6	2	573	64.8	18.62	2
High	A0A024R0Q5	Protein phosphatase 1, regulatory (Inhibitor) subunit 13 like, isoform CRA_a OS=Homo sapiens GN=PPP1R13L PE=4 SV=1	5.597	4.22705	1	1	1	828	89	7.66	1
High	Q5BKZ1	DBIRD complex subunit ZNF326 OS=Homo sapiens GN=ZNF326 PE=1 SV=2	5.591	4.98282	2	2	2	582	65.6	8.32	2
High	O00178	GTP-binding protein 1 OS=Homo sapiens GN=GTPBP1 PE=1 SV=3	5.59	4.78326	2	2	2	669	72.4	7.48	2
High	D9IAI1	Epididymis secretory protein Li 34 OS=Homo sapiens GN=PEBP1 PE=2 SV=1	5.579	18.1818	2	3	2	187	21	11.42	2
High	O43776	Asparagine--tRNA ligase, cytoplasmic OS=Homo sapiens GN=NARS PE=1 SV=1	5.547	4.0146	2	2	2	548	62.9	7.68	2
High	P40925	Malate dehydrogenase, cytoplasmic OS=Homo sapiens GN=MDH1 PE=1 SV=4	5.53	8.08383	2	2	2	334	36.4	7.4	2
High	P15121	Aldose reductase OS=Homo sapiens GN=AKR1B1 PE=1 SV=3	5.473	6.64557	2	3	2	316	35.8	8.63	2
High	V9HW37	Epididymis secretory protein Li 69 OS=Homo sapiens GN=HEL-S-69 PE=1 SV=1	5.41	6.4695	2	2	2	541	59.6	8.01	2
High	Q14157	Ubiquitin-associated protein 2-like OS=Homo sapiens GN=UBAP2L PE=1 SV=2	5.396	6.07176	3	4	3	1087	114.5	15.56	3
High	A8K8N7	Phosphoribosylformylglycinamidine synthase (FGAR amidotransferase), isoform CRA_b OS=Homo sapiens GN=PFAS PE=2 SV=1	5.382	4.33483	3	4	3	1338	144.6	14.86	3
High	J3KQR7	Centrosomal protein of 170 kDa protein B OS=Homo sapiens GN=CEP170B PE=1 SV=1	5.372	2.95597	3	3	3	1590	171.7	11.01	3
High	Q06210	Glutamine--fructose-6-phosphate aminotransferase [isomerizing] 1 OS=Homo sapiens GN=GFPT1 PE=1 SV=3	5.35	3.43348	2	2	2	699	78.8	7.35	2
High	B4DQK8	cDNA FLJ54750, moderately similar to Pyrroline-5-carboxylate reductase 2 (EC 1.5.1.2) OS=Homo sapiens PE=2 SV=1	5.34	7.79944	2	2	2	359	36.7	9.2	2
High	P62979	Ubiquitin-40S ribosomal protein S27a OS=Homo sapiens GN=RPS27A PE=1 SV=2	5.33	16.0256	2	7	2	156	18	29.28	2
High	A0A0A6YYL6	Protein RPL17-C18orf32 OS=Homo sapiens GN=RPL17-C18orf32 PE=3 SV=1	5.321	11.4035	2	2	2	228	26.4	6.22	2
High	V9HW31	ATP synthase subunit beta OS=Homo sapiens GN=HEL-S-271 PE=1 SV=1	5.189	5.29301	2	4	2	529	56.5	15.94	2
High	Q53HU8	Vimentin variant (Fragment) OS=Homo sapiens PE=2 SV=1	5.165	6.65236	3	4	3	466	53.7	12.98	3
High	B4DJQ5	cDNA FLJ59211, highly similar to Glucosidase 2 subunit beta OS=Homo sapiens PE=2 SV=1	5.125	7.28972	2	4	2	535	60.1	11.28	2
High	B2R4M6	Protein S100 OS=Homo sapiens PE=2 SV=1	5.025	24.5614	2	2	2	114	13.2	6.82	2
High	A0A087X0X3	Heterogeneous nuclear ribonucleoprotein M OS=Homo sapiens GN=HNRNPM PE=1 SV=1	5.022	2.87671	2	3	2	730	77.5	10.47	2
High	B2R7P8	cDNA, FLJ93545, highly similar to Homo sapiens 5-aminoimidazole-4-carboxamide ribonucleotide formyltransferase/IMP cyclohydrolase (ATIC), mRNA OS=Homo sapiens PE=2 SV=1	5.014	5.57432	2	2	2	592	64.6	8.93	2
High	P25685	DnaJ homolog subfamily B member 1 OS=Homo sapiens GN=DNAJB1 PE=1 SV=4	4.976	10.5882	3	4	3	340	38	13.86	3
High	O43707	Alpha-actinin-4 OS=Homo sapiens GN=ACTN4 PE=1 SV=2	4.934	4.50055	3	4	3	911	104.8	13.61	3
High	M0R0R2	40S ribosomal protein S5 OS=Homo sapiens GN=RPS5 PE=1 SV=1	4.932	9.77778	2	2	2	225	25.3	6.73	2
High	P85037	Forkhead box protein K1 OS=Homo sapiens GN=FOXK1 PE=1 SV=1	4.892	3.54707	2	2	2	733	75.4	7.76	2
High	P30040	Endoplasmic reticulum resident protein 29 OS=Homo sapiens GN=ERP29 PE=1 SV=4	4.89	9.57854	2	2	2	261	29	6.1	2
High	B2R6S5	UMP-CMP kinase OS=Homo sapiens GN=CMPK PE=2 SV=1	4.873	12.2807	2	2	2	228	25.8	7.59	2
High	A0A0A0MSS8	Aldo-keto reductase family 1 member C3 OS=Homo sapiens GN=AKR1C3 PE=1 SV=1	4.844	11.7647	2	2	2	323	36.8	10.17	2
High	Q12965	Unconventional myosin-Ie OS=Homo sapiens GN=MYO1E PE=1 SV=2	4.838	2.97834	2	2	2	1108	127	7.91	2
High	B3KRV2	cDNA FLJ34950 fis, clone NT2RP7017284, highly similar to Casein kinase I isoform epsilon (EC 2.7.11.1) OS=Homo sapiens PE=2 SV=1	4.802	6.00962	2	2	2	416	47.3	7.03	2
High	Q53HV2	Chaperonin containing TCP1, subunit 7 (Eta) variant (Fragment) OS=Homo sapiens PE=2 SV=1	4.798	5.52486	2	2	2	543	59.3	8.25	2
High	A0A024R4U3	Tubulin tyrosine ligase-like family, member 12, isoform CRA_a OS=Homo sapiens GN=TTLL12 PE=4 SV=1	4.73	3.57143	2	2	2	644	74.4	6.43	2
High	P26038	Moesin OS=Homo sapiens GN=MSN PE=1 SV=3	4.729	10.3986	3	3	3	577	67.8	11.86	3
High	P62277	40S ribosomal protein S13 OS=Homo sapiens GN=RPS13 PE=1 SV=2	4.649	16.5563	2	3	2	151	17.2	9.24	2
High	Q14498	RNA-binding protein 39 OS=Homo sapiens GN=RBM39 PE=1 SV=2	4.643	6.03774	2	2	2	530	59.3	6.21	2
High	A0A140VK27	Leukotriene A(4) hydrolase OS=Homo sapiens PE=2 SV=1	4.609	4.58265	2	3	2	611	69.2	10.63	2
High	P22626	Heterogeneous nuclear ribonucleoproteins A2/B1 OS=Homo sapiens GN=HNRNPA2B1 PE=1 SV=2	4.609	11.3314	2	2	2	353	37.4	6.56	2
High	V9HWK2	Epididymis luminal protein 114 OS=Homo sapiens GN=HEL114 PE=2 SV=1	4.502	2.29277	2	2	2	1134	123.7	7.96	2
High	P34897	Serine hydroxymethyltransferase, mitochondrial OS=Homo sapiens GN=SHMT2 PE=1 SV=3	4.493	3.37302	1	1	1	504	56	4.79	1
High	P61626	Lysozyme C OS=Homo sapiens GN=LYZ PE=1 SV=1	4.484	14.1892	2	3	2	148	16.5	9.12	2
High	Q59F66	DEAD box polypeptide 17 isoform p82 variant (Fragment) OS=Homo sapiens PE=2 SV=1	4.483	2.98507	2	4	1	737	81	12.76	2
High	Q6KB66	Keratin, type II cytoskeletal 80 OS=Homo sapiens GN=KRT80 PE=1 SV=2	4.475	5.0885	2	4	1	452	50.5	12.87	2
High	V9HWH1	Epididymis luminal protein 57 OS=Homo sapiens GN=HEL57 PE=2 SV=1	4.47	5.5409	2	2	2	379	42.7	7.18	2
High	A0A024RD93	Phosphoribosylaminoimidazole carboxylase, phosphoribosylaminoimidazole succinocarboxamide synthetase, isoform CRA_c OS=Homo sapiens GN=PAICS PE=3 SV=1	4.433	7.29412	2	2	2	425	47	8.71	2
High	G8JLB6	Heterogeneous nuclear ribonucleoprotein H OS=Homo sapiens GN=HNRNPH1 PE=1 SV=1	4.341	3.60169	1	1	1	472	51.2	5.62	1
High	B2R4C0	60S ribosomal protein L18a OS=Homo sapiens PE=2 SV=1	4.286	11.3636	2	3	2	176	20.7	9.95	2
High	P23246	Splicing factor, proline- and glutamine-rich OS=Homo sapiens GN=SFPQ PE=1 SV=2	4.265	4.52617	2	2	2	707	76.1	8.98	2
High	P17987	T-complex protein 1 subunit alpha OS=Homo sapiens GN=TCP1 PE=1 SV=1	4.211	4.67626	2	2	2	556	60.3	6.41	2
High	P26447	Protein S100-A4 OS=Homo sapiens GN=S100A4 PE=1 SV=1	4.114	18.8119	2	2	2	101	11.7	5.19	2
High	P14625	Endoplasmin OS=Homo sapiens GN=HSP90B1 PE=1 SV=1	4.09	3.61146	2	4	2	803	92.4	13.27	2
High	A5YKK6	CCR4-NOT transcription complex subunit 1 OS=Homo sapiens GN=CNOT1 PE=1 SV=2	4.006	1.47306	3	3	3	2376	266.8	9.93	3
High	Q9HBB3	60S ribosomal protein L6 OS=Homo sapiens PE=2 SV=1	4.002	7.61246	2	2	2	289	32.9	5.51	2
High	A2A3R6	40S ribosomal protein S6 OS=Homo sapiens GN=RPS6 PE=2 SV=1	3.983	10.8434	2	3	2	249	28.7	10.09	2
High	B0YIW2	Apolipoprotein C-III OS=Homo sapiens GN=APOC3 PE=1 SV=1	3.955	13.6752	1	2	1	117	12.8	9.77	1
High	Q59FZ4	Serine/threonine kinase 4 variant (Fragment) OS=Homo sapiens PE=2 SV=1	3.933	3.13112	1	1	1	511	57.8	5.33	1
High	P19623	Spermidine synthase OS=Homo sapiens GN=SRM PE=1 SV=1	3.922	8.27815	2	2	2	302	33.8	6	2
High	B2R825	Alpha-1,4 glucan phosphorylase OS=Homo sapiens PE=2 SV=1	3.922	1.65289	1	2	1	847	97	8.61	1
High	Q5H9Q6	Inosine-5'-monophosphate dehydrogenase OS=Homo sapiens GN=DKFZp781N0678 PE=2 SV=1	3.904	4.67446	3	4	2	599	64.5	11.12	3
High	P84098	60S ribosomal protein L19 OS=Homo sapiens GN=RPL19 PE=1 SV=1	3.9	8.67347	1	2	1	196	23.5	7.64	1
High	P16402	Histone H1.3 OS=Homo sapiens GN=HIST1H1D PE=1 SV=2	3.891	9.04977	2	2	2	221	22.3	5.48	2
High	Q6N092	Putative uncharacterized protein DKFZp686K18196 (Fragment) OS=Homo sapiens GN=DKFZp686K18196 PE=2 SV=1	3.884	3.27553	1	1	1	519	56.4	5.35	1
High	A0A0C4DG17	40S ribosomal protein SA OS=Homo sapiens GN=RPSA PE=1 SV=1	3.859	9	1	1	1	300	33.3	5.61	1
High	A0A024R7T3	Heterogeneous nuclear ribonucleoprotein F, isoform CRA_a OS=Homo sapiens GN=HNRPF PE=4 SV=1	3.854	8.91566	2	2	2	415	45.6	8.64	2
High	Q59G24	Activated RNA polymerase II transcription cofactor 4 variant (Fragment) OS=Homo sapiens PE=2 SV=1	3.824	17.9104	1	1	1	134	15.1	7.08	1
High	F8W1S1	Keratin, type II cytoskeletal 74 OS=Homo sapiens GN=KRT74 PE=1 SV=1	3.723	5.3407	3	8	1	543	59.4	19.28	3
High	Q5HYL6	Putative uncharacterized protein DKFZp686E1899 OS=Homo sapiens GN=DKFZp686E1899 PE=2 SV=1	3.701	5.68182	1	1	1	352	39.5	4.97	1
High	B2R6Z3	cDNA, FLJ93192, highly similar to Homo sapiens serine/threonine kinase 6 (STK6), mRNA OS=Homo sapiens PE=2 SV=1	3.668	7.69231	2	2	2	403	45.8	6.33	2
High	B4DUC8	S-methyl-5'-thioadenosine phosphorylase OS=Homo sapiens GN=MTAP PE=1 SV=1	3.664	6	1	1	1	300	33.2	5.38	1
High	H0Y449	Nuclease-sensitive element-binding protein 1 (Fragment) OS=Homo sapiens GN=YBX1 PE=1 SV=1	3.646	9.62567	2	4	2	374	42	15	2
High	P08237	ATP-dependent 6-phosphofructokinase, muscle type OS=Homo sapiens GN=PFKM PE=1 SV=2	3.642	2.5641	2	2	1	780	85.1	5.65	2
High	B3KRM2	Serine/threonine-protein phosphatase OS=Homo sapiens PE=2 SV=1	3.626	8.09061	1	1	1	309	35.5	5.29	1
High	A8K7D9	Importin subunit alpha OS=Homo sapiens PE=2 SV=1	3.577	6.61626	2	3	2	529	57.8	8.9	2
High	P37802	Transgelin-2 OS=Homo sapiens GN=TAGLN2 PE=1 SV=3	3.575	10.0503	2	2	2	199	22.4	5.6	2
High	A0A024RAZ7	Heterogeneous nuclear ribonucleoprotein A1, isoform CRA_b OS=Homo sapiens GN=HNRPA1 PE=4 SV=1	3.571	4.83871	1	3	1	372	38.7	11.44	1
High	B2R983	cDNA, FLJ94267, highly similar to Homo sapiens glutathione S-transferase omega 1 (GSTO1), mRNA OS=Homo sapiens PE=2 SV=1	3.57	9.95851	2	3	2	241	27.5	9.18	2
High	Q9NZB2	Constitutive coactivator of PPAR-gamma-like protein 1 OS=Homo sapiens GN=FAM120A PE=1 SV=2	3.503	1.25224	1	1	1	1118	121.8	4.73	1
High	P49841	Glycogen synthase kinase-3 beta OS=Homo sapiens GN=GSK3B PE=1 SV=2	3.498	4.04762	1	1	1	420	46.7	4.43	1
High	O14613	Cdc42 effector protein 2 OS=Homo sapiens GN=CDC42EP2 PE=1 SV=1	3.459	12.8571	1	1	1	210	22.5	4.79	1
High	P83731	60S ribosomal protein L24 OS=Homo sapiens GN=RPL24 PE=1 SV=1	3.458	10.828	2	2	2	157	17.8	5.81	2
High	P78328	HP47 protein (Fragment) OS=Homo sapiens PE=2 SV=1	3.437	17.9487	1	1	1	78	8.7	4.08	1
High	Q9NYU2	UDP-glucose:glycoprotein glucosyltransferase 1 OS=Homo sapiens GN=UGGT1 PE=1 SV=3	3.433	1.15756	1	1	1	1555	177.1	3.36	1
High	A0A140VJZ1	Ubiquitinyl hydrolase 1 OS=Homo sapiens PE=2 SV=1	3.425	3.37995	2	2	2	858	95.7	7.13	2
High	P62847	40S ribosomal protein S24 OS=Homo sapiens GN=RPS24 PE=1 SV=1	3.422	11.2782	1	1	1	133	15.4	4.34	1
High	A0A140VKA6	Testis secretory sperm-binding protein Li 233m OS=Homo sapiens PE=2 SV=1	3.4	6.50407	2	2	2	369	41.3	7	2
High	O15371	Eukaryotic translation initiation factor 3 subunit D OS=Homo sapiens GN=EIF3D PE=1 SV=1	3.399	5.29197	1	1	1	548	63.9	4.67	1
High	J9R021	Eukaryotic translation initiation factor 3 subunit A OS=Homo sapiens GN=eIF3a PE=2 SV=1	3.319	1.80897	2	3	2	1382	166.4	12.24	2
High	A0A1B0GW77	Alpha-aminoadipic semialdehyde dehydrogenase OS=Homo sapiens GN=ALDH7A1 PE=1 SV=1	3.319	5.59567	2	2	2	554	60	6.86	2
High	A0A024QZY1	JTV1 gene, isoform CRA_a OS=Homo sapiens GN=JTV1 PE=4 SV=1	3.315	7.8125	1	1	1	320	35.3	5.56	1
High	Q1KMD3	Heterogeneous nuclear ribonucleoprotein U-like protein 2 OS=Homo sapiens GN=HNRNPUL2 PE=1 SV=1	3.313	1.74029	1	1	1	747	85.1	4.16	1
High	Q7KZI7	Serine/threonine-protein kinase MARK2 OS=Homo sapiens GN=MARK2 PE=1 SV=2	3.288	2.15736	1	2	1	788	87.9	7.53	1
High	A0A0D9SGF6	Spectrin alpha chain, non-erythrocytic 1 OS=Homo sapiens GN=SPTAN1 PE=1 SV=1	3.283	0.520416	1	1	1	2498	287.4	4.45	1
High	H9ZYJ2	Thioredoxin OS=Homo sapiens GN=TXN PE=2 SV=1	3.281	22.8571	1	1	1	105	11.7	4.22	1
High	Q9Y678	Coatomer subunit gamma-1 OS=Homo sapiens GN=COPG1 PE=1 SV=1	3.273	1.71625	1	1	1	874	97.7	4.99	1
High	Q59ET0	Glucan, branching enzyme 1 variant (Fragment) OS=Homo sapiens PE=2 SV=1	3.259	2.25464	1	1	1	754	86.1	4.68	1
High	P26641	Elongation factor 1-gamma OS=Homo sapiens GN=EEF1G PE=1 SV=3	3.245	2.746	1	1	1	437	50.1	3.83	1
High	O60664	Perilipin-3 OS=Homo sapiens GN=PLIN3 PE=1 SV=3	3.241	7.14286	2	2	2	434	47	7.65	2
High	Q9Y305	Acyl-coenzyme A thioesterase 9, mitochondrial OS=Homo sapiens GN=ACOT9 PE=1 SV=2	3.239	4.7836	2	2	2	439	49.9	5.7	2
High	Q5JSZ5	Protein PRRC2B OS=Homo sapiens GN=PRRC2B PE=1 SV=2	3.228	0.583221	1	1	1	2229	242.8	4.12	1
High	B2R9U2	Peptidylprolyl isomerase OS=Homo sapiens PE=2 SV=1	3.188	3.7037	1	1	1	459	51.8	4.55	1
High	A0A140VK41	Testicular secretory protein Li 41 OS=Homo sapiens PE=2 SV=1	3.183	8.72274	2	2	2	321	35	7.49	2
High	P47929	Galectin-7 OS=Homo sapiens GN=LGALS7 PE=1 SV=2	3.163	18.3824	2	2	2	136	15.1	6.92	2
High	B3KT93	Polyadenylate-binding protein OS=Homo sapiens PE=2 SV=1	3.158	4.40252	2	3	2	636	70.6	8.86	2
High	P62913	60S ribosomal protein L11 OS=Homo sapiens GN=RPL11 PE=1 SV=2	3.129	7.86517	1	3	1	178	20.2	9.52	1
High	A0A140VJW2	Stathmin OS=Homo sapiens PE=2 SV=1	3.125	7.47126	1	1	1	174	19.8	4.74	1
High	B7Z268	Single-stranded DNA binding protein 1, isoform CRA_c OS=Homo sapiens GN=SSBP1 PE=2 SV=1	3.124	9.43396	1	2	1	159	18.5	7.95	1
High	P47974	mRNA decay activator protein ZFP36L2 OS=Homo sapiens GN=ZFP36L2 PE=1 SV=3	3.086	4.04858	1	1	1	494	51	5.42	1
High	O00231	26S proteasome non-ATPase regulatory subunit 11 OS=Homo sapiens GN=PSMD11 PE=1 SV=3	3.071	2.8436	1	1	1	422	47.4	4.16	1
High	P19338	Nucleolin OS=Homo sapiens GN=NCL PE=1 SV=3	3.051	1.97183	1	1	1	710	76.6	4.59	1
High	F8W031	Uncharacterized protein (Fragment) OS=Homo sapiens PE=1 SV=1	3.05	6.08365	1	2	1	263	29.2	7.29	1
High	Q53ET0	CREB-regulated transcription coactivator 2 OS=Homo sapiens GN=CRTC2 PE=1 SV=2	3.033	3.0303	1	1	1	693	73.3	4.98	1
High	V9HW12	Epididymis secretory sperm binding protein Li 2a OS=Homo sapiens GN=HEL-S-2a PE=2 SV=1	3.023	9.09091	2	3	2	198	21.9	7.15	2
High	Q08945	FACT complex subunit SSRP1 OS=Homo sapiens GN=SSRP1 PE=1 SV=1	3.016	2.11566	1	1	1	709	81	4.02	1
High	B1AKJ5	Nardilysin OS=Homo sapiens GN=NRDC PE=1 SV=1	2.985	1.06645	1	1	1	1219	139.3	4	1
High	Q12986	Transcriptional repressor NF-X1 OS=Homo sapiens GN=NFX1 PE=1 SV=2	2.978	1.16071	1	2	1	1120	124.3	5.68	1
High	P62633	Cellular nucleic acid-binding protein OS=Homo sapiens GN=CNBP PE=1 SV=1	2.964	8.47458	1	1	1	177	19.5	4.06	1
High	Q14764	Major vault protein OS=Homo sapiens GN=MVP PE=1 SV=4	2.958	2.91153	1	1	1	893	99.3	4.54	1
High	Q00796	Sorbitol dehydrogenase OS=Homo sapiens GN=SORD PE=1 SV=4	2.956	3.36134	1	1	1	357	38.3	4.14	1
High	K7ES00	Histone H3.3 (Fragment) OS=Homo sapiens GN=H3F3B PE=1 SV=1	2.952	9.27152	2	4	2	151	16.6	9.14	2
High	Q9H0I2	Enkurin domain-containing protein 1 OS=Homo sapiens GN=ENKD1 PE=1 SV=1	2.95	3.75723	1	1	1	346	38.7	3.79	1
High	B4E1U9	cDNA FLJ54776, highly similar to Cell division control protein 42 homolog OS=Homo sapiens PE=2 SV=1	2.934	8.89831	1	1	1	236	26.5	5.96	1
High	Q53GE7	Tetratricopeptide repeat domain 1 variant (Fragment) OS=Homo sapiens PE=2 SV=1	2.914	6.16438	1	1	1	292	33.6	3.47	1
High	A8K651	cDNA FLJ75700, highly similar to Homo sapiens complement component 1, q subcomponent binding protein (C1QBP), nuclear gene encoding mitochondrial protein, mRNA OS=Homo sapiens PE=2 SV=1	2.913	4.96454	1	1	1	282	31.4	3.27	1
High	Q59FI4	Importin 4 variant (Fragment) OS=Homo sapiens PE=2 SV=1	2.869	1.34494	1	1	1	1264	138.1	4.74	1
High	Q53HB3	Proteasome 26S ATPase subunit 1 variant (Fragment) OS=Homo sapiens PE=1 SV=1	2.848	4.77273	1	1	1	440	49.2	4.83	1
High	V9HW80	Epididymis luminal protein 220 OS=Homo sapiens GN=HEL-S-70 PE=2 SV=1	2.82	4.34243	1	1	1	806	89.3	4.51	1
High	A0A024RDS1	Heat shock 105kDa/110kDa protein 1, isoform CRA_c OS=Homo sapiens GN=HSPH1 PE=3 SV=1	2.819	4.662	2	2	2	858	96.8	8.74	2
High	Q9NRR5	Ubiquilin-4 OS=Homo sapiens GN=UBQLN4 PE=1 SV=2	2.806	2.16306	1	1	1	601	63.8	4.06	1
High	A8MU27	Small ubiquitin-related modifier 3 OS=Homo sapiens GN=SUMO3 PE=1 SV=1	2.792	8.16327	1	2	1	147	16.9	7.57	1
High	A8K259	cDNA FLJ78501, highly similar to Homo sapiens serpin peptidase inhibitor, clade H (heat shock protein 47), member 1, (collagen binding protein 1) (SERPINH1), mRNA OS=Homo sapiens PE=2 SV=1	2.782	2.87081	1	1	1	418	46.5	4.04	1
High	A0A1B1RVA9	Lipoprotein lipase OS=Homo sapiens GN=LPL PE=3 SV=1	2.727	4	1	4	1	475	53.1	13.29	1
High	Q5SW79	Centrosomal protein of 170 kDa OS=Homo sapiens GN=CEP170 PE=1 SV=1	2.717	1.0101	1	1	1	1584	175.2	3.61	1
High	Q8TCD0	Uncharacterized protein OS=Homo sapiens PE=1 SV=1	2.716	5.43933	1	3	1	239	26.2	10.61	1
High	A8K2U2	cDNA FLJ75392, highly similar to Homo sapiens hexokinase II (HKII) mRNA OS=Homo sapiens PE=2 SV=1	2.714	1.19956	1	1	1	917	102.3	3.8	1
High	A0A087WUT6	Eukaryotic translation initiation factor 5B OS=Homo sapiens GN=EIF5B PE=1 SV=1	2.7	1.72131	1	1	1	1220	138.6	4.73	1
High	P46776	60S ribosomal protein L27a OS=Homo sapiens GN=RPL27A PE=1 SV=2	2.694	7.43243	1	4	1	148	16.6	12.04	1
High	Q96DH6	RNA-binding protein Musashi homolog 2 OS=Homo sapiens GN=MSI2 PE=1 SV=1	2.693	4.57317	1	1	1	328	35.2	3.83	1
High	A8MUS3	60S ribosomal protein L23a OS=Homo sapiens GN=RPL23A PE=1 SV=1	2.641	6.70103	1	2	1	194	21.9	7.05	1
High	A0A024R814	Ribosomal protein L7, isoform CRA_a OS=Homo sapiens GN=RPL7 PE=4 SV=1	2.631	5.40541	1	1	1	259	30.4	4.02	1
High	P33316	Deoxyuridine 5'-triphosphate nucleotidohydrolase, mitochondrial OS=Homo sapiens GN=DUT PE=1 SV=4	2.631	4.7619	1	1	1	252	26.5	3.23	1
High	P42345	Serine/threonine-protein kinase mTOR OS=Homo sapiens GN=MTOR PE=1 SV=1	2.626	1.09847	1	1	1	2549	288.7	6.03	1
High	Q9UBK8	Methionine synthase reductase OS=Homo sapiens GN=MTRR PE=1 SV=3	2.603	2.2069	1	1	1	725	80.4	4.76	1
High	P30043	Flavin reductase (NADPH) OS=Homo sapiens GN=BLVRB PE=1 SV=3	2.596	7.28155	1	1	1	206	22.1	4.04	1
High	Q53EU7	N-myc downstream regulated gene 1 variant (Fragment) OS=Homo sapiens PE=2 SV=1	2.581	3.5533	1	1	1	394	42.8	3.25	1
High	E5KMI6	Lon protease homolog, mitochondrial OS=Homo sapiens GN=LONP1 PE=3 SV=1	2.578	3.02398	1	1	1	959	106.4	4.62	1
High	Q8TEQ6	Gem-associated protein 5 OS=Homo sapiens GN=GEMIN5 PE=1 SV=3	2.571	1.12732	1	1	1	1508	168.5	4.33	1
High	Q5TFE4	5'-nucleotidase domain-containing protein 1 OS=Homo sapiens GN=NT5DC1 PE=1 SV=1	2.546	2.85714	1	1	1	455	51.8	4.17	1
High	Q6IPI1	Ribosomal protein L29 OS=Homo sapiens GN=RPL29 PE=2 SV=1	2.542	9.31677	1	3	1	161	17.9	10.89	1
High	P62263	40S ribosomal protein S14 OS=Homo sapiens GN=RPS14 PE=1 SV=3	2.533	7.28477	1	4	1	151	16.3	11.6	1
High	Q7Z351	Putative uncharacterized protein DKFZp686N02209 OS=Homo sapiens GN=DKFZp686N02209 PE=2 SV=1	2.53	3.52697	1	1	1	482	52.8	4.36	1
High	V9HWA9	Epididymis secretory sperm binding protein Li 62p OS=Homo sapiens GN=HEL-S-62p PE=2 SV=1	2.528	1.20265	1	1	1	1663	187	4.01	1
High	A0A1B0GU03	Uncharacterized protein OS=Homo sapiens PE=1 SV=1	2.516	1.89003	1	1	1	582	62.7	3.62	1
High	Q9P2B7	Cilia- and flagella-associated protein 97 OS=Homo sapiens GN=CFAP97 PE=1 SV=2	2.512	2.06767	1	3	1	532	59.4	9.1	1
High	P05387	60S acidic ribosomal protein P2 OS=Homo sapiens GN=RPLP2 PE=1 SV=1	2.511	10.4348	1	1	1	115	11.7	3.74	1
High	P12004	Proliferating cell nuclear antigen OS=Homo sapiens GN=PCNA PE=1 SV=1	2.508	7.66284	2	2	2	261	28.8	5.39	2
High	B4DS05	cDNA FLJ59403, highly similar to Nucleosome assembly protein 1-like 4 OS=Homo sapiens PE=2 SV=1	2.475	2.59067	1	2	1	386	44.1	7.05	1
High	Q59FC3	G protein-coupled receptor kinase interactor 1 variant (Fragment) OS=Homo sapiens PE=2 SV=1	2.459	2.06718	1	1	1	774	85.8	3.72	1
High	Q15046	Lysine--tRNA ligase OS=Homo sapiens GN=KARS PE=1 SV=3	2.455	2.34506	2	2	2	597	68	4.11	2
High	Q9BR76	Coronin-1B OS=Homo sapiens GN=CORO1B PE=1 SV=1	2.442	2.04499	1	1	1	489	54.2	2.95	1
High	P46781	40S ribosomal protein S9 OS=Homo sapiens GN=RPS9 PE=1 SV=3	2.429	5.6701	1	1	1	194	22.6	3.19	1
High	P12273	Prolactin-inducible protein OS=Homo sapiens GN=PIP PE=1 SV=1	2.381	8.21918	1	1	1	146	16.6	3.5	1
High	B4DIV8	cDNA FLJ56402, highly similar to Tripeptidyl-peptidase 1 (EC 3.4.14.9) OS=Homo sapiens PE=2 SV=1	2.363	2.44755	1	1	1	572	62.2	2.87	1
High	Q8TAE8	Growth arrest and DNA damage-inducible proteins-interacting protein 1 OS=Homo sapiens GN=GADD45GIP1 PE=1 SV=1	2.359	9.00901	1	1	1	222	25.4	4.7	1
High	Q86VQ1	Glucocorticoid-induced transcript 1 protein OS=Homo sapiens GN=GLCCI1 PE=1 SV=1	2.345	3.83912	1	1	1	547	58	4.74	1
High	A8K5N5	cDNA FLJ78142, highly similar to Homo sapiens transglutaminase 1 (K polypeptide epidermal type I, protein-glutamine-gamma-glutamyltransferase), mRNA OS=Homo sapiens PE=2 SV=1	2.338	1.83599	1	1	1	817	89.7	4.54	1
High	J3KQE5	GTP-binding nuclear protein Ran (Fragment) OS=Homo sapiens GN=RAN PE=1 SV=1	2.334	8.97436	2	2	2	234	26.8	6.25	2
High	B2RA34	cDNA, FLJ94678, highly similar to Homo sapiens BCL2-associated athanogene 4 (BAG4), mRNA OS=Homo sapiens PE=2 SV=1	2.323	5.9081	1	1	1	457	49.6	4.61	1
High	A0A024R172	Leukotriene B4 12-hydroxydehydrogenase, isoform CRA_a OS=Homo sapiens GN=LTB4DH PE=4 SV=1	2.32	3.03951	1	1	1	329	35.9	2.5	1
High	O75792	Ribonuclease H2 subunit A OS=Homo sapiens GN=RNASEH2A PE=1 SV=2	2.318	4.68227	1	1	1	299	33.4	3.58	1
High	Q9H4F8	SPARC-related modular calcium-binding protein 1 OS=Homo sapiens GN=SMOC1 PE=1 SV=1	2.304	2.53456	1	1	1	434	48.1	2.28	1
High	Q14008	Cytoskeleton-associated protein 5 OS=Homo sapiens GN=CKAP5 PE=1 SV=3	2.299	0.590551	1	1	1	2032	225.4	3.84	1
High	M0R0H3	mRNA decay activator protein ZFP36 (Fragment) OS=Homo sapiens GN=ZFP36 PE=1 SV=1	2.291	6.12245	1	3	1	343	35.7	11.82	1
High	Q9UKK3	Poly [ADP-ribose] polymerase 4 OS=Homo sapiens GN=PARP4 PE=1 SV=3	2.287	0.638051	1	1	1	1724	192.5	3.36	1
High	A0A024R8U5	Splicing factor, arginine/serine-rich 2, isoform CRA_a OS=Homo sapiens GN=SFRS2 PE=4 SV=1	2.282	7.69231	1	3	1	221	25.5	11.13	1
High	P49207	60S ribosomal protein L34 OS=Homo sapiens GN=RPL34 PE=1 SV=3	2.281	7.69231	1	2	1	117	13.3	4.7	1
High	P26373	60S ribosomal protein L13 OS=Homo sapiens GN=RPL13 PE=1 SV=4	2.274	6.16114	1	3	1	211	24.2	11.76	1
High	B9EKV4	Aldehyde dehydrogenase 9 family, member A1 OS=Homo sapiens GN=ALDH9A1 PE=2 SV=1	2.272	3.0888	1	1	1	518	56.3	4.02	1
High	P39023	60S ribosomal protein L3 OS=Homo sapiens GN=RPL3 PE=1 SV=2	2.263	2.97767	1	1	1	403	46.1	3.72	1
High	P17812	CTP synthase 1 OS=Homo sapiens GN=CTPS1 PE=1 SV=2	2.252	2.03046	1	1	1	591	66.6	3.54	1
High	B2R9B8	cDNA, FLJ94320 OS=Homo sapiens PE=2 SV=1	2.25	3.38462	1	1	1	325	35.1	2.45	1
High	A0A024R6W0	Aspartate aminotransferase OS=Homo sapiens GN=GOT2 PE=4 SV=1	2.243	2.7907	1	3	1	430	47.4	11.2	1
High	A0A024RC29	Desmocollin 3, isoform CRA_b OS=Homo sapiens GN=DSC3 PE=4 SV=1	2.236	1.5625	1	1	1	896	99.9	4.07	1
High	P41091	Eukaryotic translation initiation factor 2 subunit 3 OS=Homo sapiens GN=EIF2S3 PE=1 SV=3	2.222	2.9661	1	1	1	472	51.1	3.24	1
High	M0R2B7	DNA polymerase OS=Homo sapiens GN=POLD1 PE=1 SV=1	2.216	0.882613	1	1	1	1133	126.3	3.28	1
High	P01040	Cystatin-A OS=Homo sapiens GN=CSTA PE=1 SV=1	2.209	18.3673	1	1	1	98	11	3.48	1
High	P54819	Adenylate kinase 2, mitochondrial OS=Homo sapiens GN=AK2 PE=1 SV=2	2.19	4.1841	1	1	1	239	26.5	3	1
High	A0A024R8I8	Chromosome 9 open reading frame 140, isoform CRA_a OS=Homo sapiens GN=C9orf140 PE=4 SV=1	2.18	9.64467	2	2	2	394	42.5	7.93	2
High	A0A024R5C5	Pyruvate carboxylase OS=Homo sapiens GN=PC PE=4 SV=1	2.172	1.35823	1	1	1	1178	129.6	3.96	1
High	P41250	Glycine--tRNA ligase OS=Homo sapiens GN=GARS PE=1 SV=3	2.165	1.75913	1	1	1	739	83.1	4.3	1
High	J3KR97	Tubulin-specific chaperone D OS=Homo sapiens GN=TBCD PE=1 SV=1	2.152	0.813008	1	1	1	1230	136.5	3.07	1
High	Q6P4A8	Phospholipase B-like 1 OS=Homo sapiens GN=PLBD1 PE=1 SV=2	2.148	2.16998	1	1	1	553	63.2	4.14	1
High	B2R7W4	cDNA, FLJ93632, highly similar to Homo sapiens heterogeneous nuclear ribonucleoprotein R (HNRPR), mRNA OS=Homo sapiens PE=2 SV=1	2.128	1.89573	1	2	1	633	70.9	5.65	1
High	B3KX14	cDNA FLJ44463 fis, clone UTERU2024969, highly similar to Mortality factor 4-like protein 2 OS=Homo sapiens PE=2 SV=1	2.125	6.25	1	1	1	288	32.3	3.59	1
High	B4DX78	cDNA FLJ55484, highly similar to ATP-dependent RNA helicase DDX39 (EC 3.6.1.-) OS=Homo sapiens PE=2 SV=1	2.113	2.12766	1	1	1	470	53.7	3.03	1
High	A0A0A6YYJ8	Putative RNA-binding protein Luc7-like 2 OS=Homo sapiens GN=LUC7L2 PE=4 SV=1	2.098	2.62009	1	1	1	458	54.2	2.85	1
High	O14737	Programmed cell death protein 5 OS=Homo sapiens GN=PDCD5 PE=1 SV=3	2.09	10.4	1	1	1	125	14.3	4.58	1
High	Q6UWP8	Suprabasin OS=Homo sapiens GN=SBSN PE=1 SV=2	2.082	3.05085	1	2	1	590	60.5	8.15	1
High	A0A0K0K1K7	6-phosphogluconolactonase, isoform CRA_b OS=Homo sapiens GN=HEL-S-304 PE=2 SV=1	2.052	4.65116	1	1	1	258	27.5	3.81	1
High	P17980	26S protease regulatory subunit 6A OS=Homo sapiens GN=PSMC3 PE=1 SV=3	2.052	2.2779	1	1	1	439	49.2	2.97	1
High	Q8TAP8	Protein phosphatase 1 regulatory subunit 35 OS=Homo sapiens GN=PPP1R35 PE=1 SV=1	2.051	3.95257	1	1	1	253	27.9	3.38	1
High	P13804	Electron transfer flavoprotein subunit alpha, mitochondrial OS=Homo sapiens GN=ETFA PE=1 SV=1	2.049	3.9039	1	2	1	333	35.1	8.98	1
High	B7Z4C8	60S ribosomal protein L31 OS=Homo sapiens GN=RPL31 PE=1 SV=1	2.04	6.92308	1	4	1	130	15.1	12.4	1
High	Q16610	Extracellular matrix protein 1 OS=Homo sapiens GN=ECM1 PE=1 SV=2	2.027	1.66667	1	1	1	540	60.6	2.47	1
High	D2IYL2	Corneodesmosin OS=Homo sapiens GN=CDSN PE=4 SV=1	2.021	3.40265	1	4	1	529	51.5	16.37	1
High	K7ELC7	60S ribosomal protein L27 (Fragment) OS=Homo sapiens GN=RPL27 PE=1 SV=1	1.976	6.25	1	3	1	144	16.5	8.59	1
High	B0YIW6	Archain 1, isoform CRA_a OS=Homo sapiens GN=ARCN1 PE=1 SV=1	1.966	1.81159	1	2	1	552	61.6	5.37	1
High	A4D2P0	Ras-related C3 botulinum toxin substrate 1 (Rho family, small GTP binding protein Rac1) OS=Homo sapiens GN=RAC1 PE=2 SV=1	1.96	4.73934	1	1	1	211	23.5	2.6	1
High	Q9BX40	Protein LSM14 homolog B OS=Homo sapiens GN=LSM14B PE=1 SV=1	1.947	2.85714	1	1	1	385	42	3.05	1
High	Q96PJ5	Fc receptor-like protein 4 OS=Homo sapiens GN=FCRL4 PE=1 SV=1	1.93	3.49515	1	1	1	515	57.2	3.22	1
High	Q16629	Serine/arginine-rich splicing factor 7 OS=Homo sapiens GN=SRSF7 PE=1 SV=1	1.923	5.88235	1	1	1	238	27.4	3.7	1
High	A0A024R6S1	DnaJ (Hsp40) homolog, subfamily A, member 2, isoform CRA_a OS=Homo sapiens GN=DNAJA2 PE=3 SV=1	1.916	3.15534	1	1	1	412	45.7	2.52	1
High	A0A0U1RRH7	Histone H2A OS=Homo sapiens PE=3 SV=1	1.913	5.29412	1	6	1	170	18.5	20.42	1
High	A0A024R6D1	NIMA (Never in mitosis gene a)-related kinase 9, isoform CRA_a OS=Homo sapiens GN=NEK9 PE=4 SV=1	1.904	1.32789	1	1	1	979	107.1	3.82	1
High	Q6PKG0	La-related protein 1 OS=Homo sapiens GN=LARP1 PE=1 SV=2	1.902	0.729927	1	1	1	1096	123.4	2.41	1
High	P49720	Proteasome subunit beta type-3 OS=Homo sapiens GN=PSMB3 PE=1 SV=2	1.899	7.80488	1	1	1	205	22.9	4.35	1
High	J3KQ69	DNA replication licensing factor MCM3 OS=Homo sapiens GN=MCM3 PE=1 SV=2	1.866	0.977995	1	1	1	818	91.9	2.35	1
High	Q59GK9	Ribosomal protein L21 variant (Fragment) OS=Homo sapiens PE=2 SV=1	1.856	9.20245	1	1	1	163	18.9	3.68	1
High	P52788	Spermine synthase OS=Homo sapiens GN=SMS PE=1 SV=2	1.851	2.18579	1	1	1	366	41.2	2.36	1
High	A4D1G5	40S ribosomal protein S27 OS=Homo sapiens GN=LOC392748 PE=3 SV=1	1.85	5.40541	1	1	1	148	16.9	2.52	1
High	V9HWE0	Annexin OS=Homo sapiens GN=HEL-S-7 PE=2 SV=1	1.846	2.8125	1	1	1	320	35.9	3.03	1
High	P31151	Protein S100-A7 OS=Homo sapiens GN=S100A7 PE=1 SV=4	1.837	10.8911	1	1	1	101	11.5	3.38	1
High	D6REE5	Receptor of-activated protein C kinase 1 (Fragment) OS=Homo sapiens GN=RACK1 PE=1 SV=1	1.83	3.11526	1	1	1	321	34.9	3.06	1
High	Q2F838	Eukaryotic translation elongation factor 1 gamma (Fragment) OS=Homo sapiens PE=2 SV=1	1.826	14.9425	1	2	1	87	9.6	6.36	1
High	Q9UHD9	Ubiquilin-2 OS=Homo sapiens GN=UBQLN2 PE=1 SV=2	1.826	2.5641	1	1	1	624	65.7	4.83	1
High	O95881	Thioredoxin domain-containing protein 12 OS=Homo sapiens GN=TXNDC12 PE=1 SV=1	1.82	5.23256	1	1	1	172	19.2	2.43	1
High	Q7RU04	Aminopeptidase B OS=Homo sapiens GN=RNPEP PE=4 SV=1	1.81	1.82371	1	1	1	658	73.5	3.53	1
High	A0A158RFU6	RAB7, member RAS oncogene family, isoform CRA_a OS=Homo sapiens GN=RAB7A PE=2 SV=1	1.796	6.76329	1	1	1	207	23.5	4.07	1
High	Q9NQW7	Xaa-Pro aminopeptidase 1 OS=Homo sapiens GN=XPNPEP1 PE=1 SV=3	1.786	1.44462	1	1	1	623	69.9	3.28	1
High	E9PRY8	Elongation factor 1-delta OS=Homo sapiens GN=EEF1D PE=1 SV=1	1.778	1.72166	1	1	1	697	76.5	2.9	1
High	Q7L5N1	COP9 signalosome complex subunit 6 OS=Homo sapiens GN=COPS6 PE=1 SV=1	1.777	3.97554	1	1	1	327	36.1	4.4	1
High	P81605	Dermcidin OS=Homo sapiens GN=DCD PE=1 SV=2	1.776	10	1	2	1	110	11.3	6.53	1
High	A0A024R1Q8	Ribosomal protein L23, isoform CRA_b OS=Homo sapiens GN=RPL23 PE=3 SV=1	1.769	5.71429	1	6	1	140	14.9	15	1
High	B4DRM3	cDNA FLJ54492, highly similar to Eukaryotic translation initiation factor 4B OS=Homo sapiens PE=2 SV=1	1.768	2.5974	1	1	1	616	69.7	3.61	1
High	Q9BXP5	Serrate RNA effector molecule homolog OS=Homo sapiens GN=SRRT PE=1 SV=1	1.753	1.94064	1	1	1	876	100.6	3.73	1
High	O14639	Actin-binding LIM protein 1 OS=Homo sapiens GN=ABLIM1 PE=1 SV=3	1.732	1.79949	1	2	1	778	87.6	8.9	1
High	A0A024R9Y7	Melanoma antigen family D, 2, isoform CRA_a OS=Homo sapiens GN=MAGED2 PE=4 SV=1	1.725	2.14521	1	1	1	606	64.9	2.9	1
High	Q8N7G1	Purine nucleoside phosphorylase OS=Homo sapiens PE=2 SV=1	1.696	3.07167	1	1	1	293	32.5	2.58	1
High	Q9H3H9	Transcription elongation factor A protein-like 2 OS=Homo sapiens GN=TCEAL2 PE=2 SV=1	1.681	3.96476	1	1	1	227	25.8	3.14	1
High	V9HW87	Abhydrolase domain containing 14B, isoform CRA_a OS=Homo sapiens GN=HEL-S-299 PE=2 SV=1	1.681	6.66667	1	1	1	210	22.3	3.82	1
High	E5KSX8	Mitochondrial transcription factor A OS=Homo sapiens PE=4 SV=1	1.679	4.06504	1	1	1	246	29.1	2.77	1
High	A0A0G2JH68	Protein diaphanous homolog 1 OS=Homo sapiens GN=DIAPH1 PE=1 SV=1	1.644	0.707547	1	1	1	1272	141.3	2.6	1
High	B2R7W6	cDNA, FLJ93636, highly similar to Homo sapiens zinc finger protein 140 (clone pHZ-39) (ZNF140), mRNA OS=Homo sapiens PE=2 SV=1	1.622	2.62582	1	1	1	457	52.9	2.87	1
High	C9JJ19	28S ribosomal protein S34, mitochondrial OS=Homo sapiens GN=MRPS34 PE=1 SV=2	1.619	3.55556	1	1	1	225	26.3	2.72	1
High	Q13045	Protein flightless-1 homolog OS=Homo sapiens GN=FLII PE=1 SV=2	1.593	0.551615	1	1	1	1269	144.7	1.84	1
High	Q86Y79	Probable peptidyl-tRNA hydrolase OS=Homo sapiens GN=PTRH1 PE=1 SV=1	1.584	6.07477	1	1	1	214	22.9	3.24	1
High	O14641	Segment polarity protein dishevelled homolog DVL-2 OS=Homo sapiens GN=DVL2 PE=1 SV=1	1.581	1.63043	1	1	1	736	78.9	2.45	1
High	D3DQ70	SERPINE1 mRNA binding protein 1, isoform CRA_d OS=Homo sapiens GN=SERBP1 PE=4 SV=1	1.577	3.44086	1	1	1	465	50.9	3.54	1
High	P62854	40S ribosomal protein S26 OS=Homo sapiens GN=RPS26 PE=1 SV=3	1.543	10.4348	1	1	1	115	13	3.66	1
High	A8K6A2	cDNA FLJ77317, highly similar to Homo sapiens retinoblastoma binding protein 7 (RBBP7), mRNA OS=Homo sapiens PE=2 SV=1	1.538	1.88235	1	1	1	425	47.8	2.45	1
High	H0YKD8	60S ribosomal protein L28 OS=Homo sapiens GN=RPL28 PE=1 SV=1	1.535	6.47059	1	1	1	170	19.1	2.82	1
High	P51991	Heterogeneous nuclear ribonucleoprotein A3 OS=Homo sapiens GN=HNRNPA3 PE=1 SV=2	1.513	5.82011	1	2	1	378	39.6	6.62	1
High	A0A161I202	Lactoferrin OS=Homo sapiens GN=LTF PE=2 SV=1	1.512	1.26582	1	2	1	711	78.3	4.26	1
High	P25786	Proteasome subunit alpha type-1 OS=Homo sapiens GN=PSMA1 PE=1 SV=1	1.506	5.70342	1	1	1	263	29.5	2.86	1
High	P23284	Peptidyl-prolyl cis-trans isomerase B OS=Homo sapiens GN=PPIB PE=1 SV=2	1.489	3.7037	1	1	1	216	23.7	1.83	1
High	P51970	NADH dehydrogenase [ubiquinone] 1 alpha subcomplex subunit 8 OS=Homo sapiens GN=NDUFA8 PE=1 SV=3	1.487	4.06977	1	1	1	172	20.1	2.43	1
High	Q9UGM3	Deleted in malignant brain tumors 1 protein OS=Homo sapiens GN=DMBT1 PE=1 SV=2	1.478	6.96229	1	1	1	2413	260.6	4.6	1
High	P14174	Macrophage migration inhibitory factor OS=Homo sapiens GN=MIF PE=1 SV=4	1.467	7.82609	1	1	1	115	12.5	2.96	1
High	P28072	Proteasome subunit beta type-6 OS=Homo sapiens GN=PSMB6 PE=1 SV=4	1.466	4.60251	1	2	1	239	25.3	6.91	1
High	P21399	Cytoplasmic aconitate hydratase OS=Homo sapiens GN=ACO1 PE=1 SV=3	1.462	0.899888	1	1	1	889	98.3	2.67	1
High	Q9BYX2	TBC1 domain family member 2A OS=Homo sapiens GN=TBC1D2 PE=1 SV=3	1.452	0.75431	1	1	1	928	105.3	2.27	1
High	O75390	Citrate synthase, mitochondrial OS=Homo sapiens GN=CS PE=1 SV=2	1.442	2.36052	1	1	1	466	51.7	3.28	1
High	B2RD36	cDNA, FLJ96437 OS=Homo sapiens PE=2 SV=1	1.435	3.26531	1	1	1	245	28	2.01	1
High	P62195	26S protease regulatory subunit 8 OS=Homo sapiens GN=PSMC5 PE=1 SV=1	1.429	4.6798	1	1	1	406	45.6	4	1
High	S4R3N1	Protein HSPE1-MOB4 OS=Homo sapiens GN=HSPE1-MOB4 PE=3 SV=1	1.428	2.68199	1	1	1	261	29.7	1.73	1
High	P62269	40S ribosomal protein S18 OS=Homo sapiens GN=RPS18 PE=1 SV=3	1.373	5.26316	1	1	1	152	17.7	2.67	1
High	P62424	60S ribosomal protein L7a OS=Homo sapiens GN=RPL7A PE=1 SV=2	1.364	3.00752	1	1	1	266	30	2.79	1
High	P15880	40S ribosomal protein S2 OS=Homo sapiens GN=RPS2 PE=1 SV=2	1.36	2.73038	1	1	1	293	31.3	2.46	1
High	Q6IPX4	40S ribosomal protein S16 OS=Homo sapiens GN=RPS16 PE=1 SV=1	1.353	5.92105	1	1	1	152	17.1	2.38	1
High	Q96T76	MMS19 nucleotide excision repair protein homolog OS=Homo sapiens GN=MMS19 PE=1 SV=2	1.347	1.65049	1	1	1	1030	113.2	2.62	1
High	A6NKH3	Putative 60S ribosomal protein L37a-like protein OS=Homo sapiens GN=RPL37AP8 PE=5 SV=2	1.344	8.60215	1	1	1	93	10.6	2.51	1
High	A0A024R2M7	Oxidative-stress responsive 1, isoform CRA_a OS=Homo sapiens GN=OXSR1 PE=4 SV=1	1.337	1.51803	1	1	1	527	58	2.33	1
High	B3KTN0	cDNA FLJ38518 fis, clone HCHON2000738, highly similar to Homo sapiens suppression of tumorigenicity 7 like (ST7L), transcript variant 3, mRNA OS=Homo sapiens PE=2 SV=1	1.318	7.75623	1	1	1	361	40.9	4.13	1
High	Q8N187	Calcium-responsive transcription factor OS=Homo sapiens GN=CARF PE=1 SV=2	1.263	1.37931	1	1	1	725	80.6	3.14	1
High	P62917	60S ribosomal protein L8 OS=Homo sapiens GN=RPL8 PE=1 SV=2	1.26	6.22568	1	1	1	257	28	3.29	1
High	A0A024R904	Calcyclin binding protein, isoform CRA_a OS=Homo sapiens GN=CACYBP PE=4 SV=1	1.259	3.07018	1	1	1	228	26.2	2.15	1
High	A8K3M9	cDNA FLJ76387, highly similar to Homo sapiens splicing factor, arginine/serine-rich 9 (SFRS9), mRNA OS=Homo sapiens PE=2 SV=1	1.258	3.61991	1	1	1	221	25.5	1.87	1
High	Q96DA0	Zymogen granule protein 16 homolog B OS=Homo sapiens GN=ZG16B PE=1 SV=3	1.25	4.32692	1	1	1	208	22.7	2.45	1
High	O60271	C-Jun-amino-terminal kinase-interacting protein 4 OS=Homo sapiens GN=SPAG9 PE=1 SV=4	1.232	1.2112	1	1	1	1321	146.1	4.12	1
High	Q53FN7	BZW1 protein variant (Fragment) OS=Homo sapiens PE=2 SV=1	1.214	2.12264	1	1	1	424	48.6	2.9	1
High	Q8WVV4	Protein POF1B OS=Homo sapiens GN=POF1B PE=1 SV=3	1.2	1.69779	1	1	1	589	68	3.24	1
High	Q63HJ5	Putative uncharacterized protein DKFZp686L2367 OS=Homo sapiens GN=DKFZp686L2367 PE=2 SV=1	1.199	0.399042	1	1	1	2506	284.5	2.27	1
High	A0A024RCZ8	Kinesin light chain 4, isoform CRA_a OS=Homo sapiens GN=KLC4 PE=4 SV=1	1.197	1.61551	1	1	1	619	68.6	2.6	1
High	A4D0V4	Capping protein (Actin filament) muscle Z-line, alpha 2 OS=Homo sapiens GN=CAPZA2 PE=2 SV=1	1.173	3.4965	1	1	1	286	32.9	2.62	1
High	Q8TC07	TBC1 domain family member 15 OS=Homo sapiens GN=TBC1D15 PE=1 SV=2	1.166	2.17077	1	1	1	691	79.4	3.64	1
High	Q53F64	Heterogeneous nuclear ribonucleoprotein AB isoform a variant (Fragment) OS=Homo sapiens PE=2 SV=1	1.148	4.21687	1	1	1	332	36	3.86	1
High	Q9Y3U8	60S ribosomal protein L36 OS=Homo sapiens GN=RPL36 PE=1 SV=3	1.147	9.52381	1	1	1	105	12.2	2.92	1
High	Q53F55	Deoxythymidylate kinase (Thymidylate kinase) variant (Fragment) OS=Homo sapiens PE=2 SV=1	1.146	5.18868	1	2	1	212	23.7	6.33	1
High	P40763	Signal transducer and activator of transcription 3 OS=Homo sapiens GN=STAT3 PE=1 SV=2	1.122	2.20779	1	1	1	770	88	3.12	1
Medium	M0QYS1	60S ribosomal protein L13a (Fragment) OS=Homo sapiens GN=RPL13A PE=1 SV=2	1.084	5.2381	1	1	1	210	24.2	2.76	1
Medium	P25788	Proteasome subunit alpha type-3 OS=Homo sapiens GN=PSMA3 PE=1 SV=2	1.04	3.13725	1	1	1	255	28.4	0	1
Medium	G3V2J9	Tubulin polyglutamylase TTLL5 OS=Homo sapiens GN=TTLL5 PE=1 SV=1	1.025	0.78064	1	1	1	1281	144.1	2.66	1
Medium	P55039	Developmentally-regulated GTP-binding protein 2 OS=Homo sapiens GN=DRG2 PE=1 SV=1	1.02	3.02198	1	1	1	364	40.7	2.94	1
Medium	Q5T749	Keratinocyte proline-rich protein OS=Homo sapiens GN=KPRP PE=1 SV=1	0.986	1.38169	1	1	1	579	64.1	1.81	1
Medium	Q96F86	Enhancer of mRNA-decapping protein 3 OS=Homo sapiens GN=EDC3 PE=1 SV=1	0.971	1.77165	1	1	1	508	56	2.22	1
Medium	B4DR52	Histone H2B OS=Homo sapiens PE=2 SV=1	0.969	5.42169	1	1	1	166	18	2.28	1
Medium	V9HW63	Epididymis secretory sperm binding protein Li 97n OS=Homo sapiens GN=HEL-S-97n PE=2 SV=1	0.963	4.05904	1	1	1	271	30.5	3.13	1
Medium	Q9NZL4	Hsp70-binding protein 1 OS=Homo sapiens GN=HSPBP1 PE=1 SV=1	0.959	3.31492	1	1	1	362	39.4	3.19	1
Medium	Q8WYK0	Acyl-coenzyme A thioesterase 12 OS=Homo sapiens GN=ACOT12 PE=1 SV=1	0.952	2.34234	1	1	1	555	62	2.41	1
Medium	A0A1B0GUA8	Kinesin-like protein KIF13A OS=Homo sapiens GN=KIF13A PE=1 SV=1	0.95	0.704607	1	1	1	1845	207.1	3.7	1
Medium	Q5IBP5	AKAP9-BRAF fusion protein OS=Homo sapiens PE=2 SV=1	0.94	0.603217	1	1	1	1492	172.1	2.83	1
Medium	Q15645	Pachytene checkpoint protein 2 homolog OS=Homo sapiens GN=TRIP13 PE=1 SV=2	0.934	2.31481	1	1	1	432	48.5	3.4	1

## Sheet: HeLa Trypsin Repl 2
Protein FDR Confidence	UniProt ID	Description	Sum PEP Score	Coverage	# Peptides	# PSMs	# Unique Peptides	# AAs	MW [kDa]	Score Sequest HT	# Peptides Sequest HT
High	H6VRG1	Keratin 1 OS=Homo sapiens GN=KRT1 PE=3 SV=1	169.985	66.8217	51	155	43	645	66.1	614.76	51
High	Q05BQ2	TIPARP protein (Fragment) OS=Homo sapiens GN=TIPARP PE=2 SV=1	169.977	40.303	26	162	26	660	76.6	605.66	26
High	P07437	Tubulin beta chain OS=Homo sapiens GN=TUBB PE=1 SV=2	156.982	83.1081	29	230	5	444	49.6	866.2	29
High	B2R6L0	Tubulin beta chain OS=Homo sapiens PE=2 SV=1	153.759	70.7865	27	223	5	445	49.9	832.83	27
High	P35908	Keratin, type II cytoskeletal 2 epidermal OS=Homo sapiens GN=KRT2 PE=1 SV=2	132.556	67.6056	43	88	29	639	65.4	337.21	43
High	P35527	Keratin, type I cytoskeletal 9 OS=Homo sapiens GN=KRT9 PE=1 SV=3	132.13	69.1814	38	125	37	623	62	499.12	38
High	P04350	Tubulin beta-4A chain OS=Homo sapiens GN=TUBB4A PE=1 SV=2	131.461	75	24	198	2	444	49.6	722.54	24
High	Q53GA7	Tubulin alpha chain (Fragment) OS=Homo sapiens PE=2 SV=1	124.711	68.5969	25	138	4	449	49.8	559.04	25
High	Q1ZYQ1	Tubulin alpha chain OS=Homo sapiens GN=TUBA2 PE=2 SV=1	124.134	68.4444	24	180	5	450	49.9	756.16	24
High	P13645	Keratin, type I cytoskeletal 10 OS=Homo sapiens GN=KRT10 PE=1 SV=6	112.74	57.8767	34	94	28	584	58.8	335.65	34
High	P68366	Tubulin alpha-4A chain OS=Homo sapiens GN=TUBA4A PE=1 SV=1	109.727	54.9107	21	157	4	448	49.9	664.59	21
High	Q13509	Tubulin beta-3 chain OS=Homo sapiens GN=TUBB3 PE=1 SV=2	109.132	52	21	184	5	450	50.4	676.83	21
High	P15924	Desmoplakin OS=Homo sapiens GN=DSP PE=1 SV=3	106.705	17.729	43	50	43	2871	331.6	170.78	43
High	B3KML9	cDNA FLJ11352 fis, clone HEMBA1000020, highly similar to Tubulin beta-2C chain OS=Homo sapiens PE=2 SV=1	105.613	67.2544	22	185	2	397	44.6	642.77	22
High	P09874	Poly [ADP-ribose] polymerase 1 OS=Homo sapiens GN=PARP1 PE=1 SV=4	91.693	38.5602	34	44	34	1014	113	139.01	34
High	B2RBS8	cDNA, FLJ95666, highly similar to Homo sapiens albumin (ALB), mRNA OS=Homo sapiens PE=2 SV=1	87.335	46.1412	34	61	34	609	69.3	182.91	34
High	Q2NKY5	Tubulin beta chain OS=Homo sapiens GN=TUBB6 PE=2 SV=1	86.392	56.3758	21	120	1	447	50.1	438.2	21
High	P13647	Keratin, type II cytoskeletal 5 OS=Homo sapiens GN=KRT5 PE=1 SV=3	83.871	52.3729	34	49	19	590	62.3	155.47	34
High	A0A0S2Z428	HCG2039812, isoform CRA_b (Fragment) OS=Homo sapiens GN=KRT6A PE=2 SV=1	82.491	56.5603	36	48	5	564	60	160.39	36
High	P49327	Fatty acid synthase OS=Homo sapiens GN=FASN PE=1 SV=3	76.647	17.284	30	32	30	2511	273.3	120.75	30
High	P04259	Keratin, type II cytoskeletal 6B OS=Homo sapiens GN=KRT6B PE=1 SV=5	76.126	51.773	34	49	3	564	60	159.56	34
High	P02533	Keratin, type I cytoskeletal 14 OS=Homo sapiens GN=KRT14 PE=1 SV=4	75.181	56.1441	26	51	12	472	51.5	167.97	26
High	Q9BUF5	Tubulin beta-6 chain OS=Homo sapiens GN=TUBB6 PE=1 SV=1	75.148	57.6233	19	97	1	446	49.8	338.11	19
High	V9HWB8	Pyruvate kinase OS=Homo sapiens GN=HEL-S-30 PE=1 SV=1	74.004	53.1073	22	33	22	531	57.9	133.93	22
High	P08779	Keratin, type I cytoskeletal 16 OS=Homo sapiens GN=KRT16 PE=1 SV=4	73.721	57.9281	28	50	15	473	51.2	158.56	28
High	P63261	Actin, cytoplasmic 2 OS=Homo sapiens GN=ACTG1 PE=1 SV=1	72.2	60.5333	17	35	9	375	41.8	135.64	17
High	P08238	Heat shock protein HSP 90-beta OS=Homo sapiens GN=HSP90AB1 PE=1 SV=4	69.794	39.9171	23	36	14	724	83.2	126.22	23
High	P13639	Elongation factor 2 OS=Homo sapiens GN=EEF2 PE=1 SV=4	69.207	29.021	23	31	23	858	95.3	111.95	23
High	Q7Z2W4	Zinc finger CCCH-type antiviral protein 1 OS=Homo sapiens GN=ZC3HAV1 PE=1 SV=3	66.945	36.918	23	25	1	902	101.4	99.98	23
High	C9J6P4	Zinc finger CCCH-type antiviral protein 1 OS=Homo sapiens GN=ZC3HAV1 PE=1 SV=1	65.769	32.0312	23	25	1	1024	114	99.31	23
High	P04406	Glyceraldehyde-3-phosphate dehydrogenase OS=Homo sapiens GN=GAPDH PE=1 SV=3	64.004	73.1343	19	32	19	335	36	123.57	19
High	V9HW22	Epididymis luminal protein 33 OS=Homo sapiens GN=HEL-S-72p PE=2 SV=1	63.007	40.5573	22	32	13	646	70.9	116.43	22
High	P07900	Heat shock protein HSP 90-alpha OS=Homo sapiens GN=HSP90AA1 PE=1 SV=5	62.125	36.2022	21	28	13	732	84.6	100.43	21
High	Q3ZCM7	Tubulin beta-8 chain OS=Homo sapiens GN=TUBB8 PE=1 SV=2	57.396	28.1532	12	97	1	444	49.7	339.09	12
High	Q86YZ3	Hornerin OS=Homo sapiens GN=HRNR PE=1 SV=2	53.954	15.193	16	22	16	2850	282.2	89.22	16
High	E9PMS6	LIM domain only protein 7 OS=Homo sapiens GN=LMO7 PE=1 SV=1	52.485	24.7059	23	25	23	1275	145.3	87.88	23
High	P00558	Phosphoglycerate kinase 1 OS=Homo sapiens GN=PGK1 PE=1 SV=3	51.499	62.1103	21	31	21	417	44.6	116.64	21
High	P12268	Inosine-5'-monophosphate dehydrogenase 2 OS=Homo sapiens GN=IMPDH2 PE=1 SV=2	49.315	50	21	23	19	514	55.8	86.21	21
High	P68104	Elongation factor 1-alpha 1 OS=Homo sapiens GN=EEF1A1 PE=1 SV=1	47.839	44.5887	15	28	15	462	50.1	106.66	15
High	A0A0S2Z410	Hydroxysteroid dehydrogenase 10 isoform 1 (Fragment) OS=Homo sapiens GN=HSD17B10 PE=2 SV=1	46.826	63.2184	13	16	13	261	26.9	73.43	13
High	Q59EJ3	Heat shock 70kDa protein 1A variant (Fragment) OS=Homo sapiens PE=2 SV=1	44.494	26.5162	16	20	10	709	77.4	73.13	16
High	A0A024R1X8	Junction plakoglobin, isoform CRA_a OS=Homo sapiens GN=JUP PE=4 SV=1	43.559	27.3826	16	20	16	745	81.7	68.79	16
High	P21333	Filamin-A OS=Homo sapiens GN=FLNA PE=1 SV=4	43.401	12.2025	21	22	21	2647	280.6	85.49	21
High	P04075	Fructose-bisphosphate aldolase A OS=Homo sapiens GN=ALDOA PE=1 SV=2	42.989	58.5165	15	19	13	364	39.4	76.02	15
High	Q02413	Desmoglein-1 OS=Homo sapiens GN=DSG1 PE=1 SV=2	42.823	20.1144	15	18	15	1049	113.7	68.61	15
High	P06733	Alpha-enolase OS=Homo sapiens GN=ENO1 PE=1 SV=2	42.784	52.3041	14	16	14	434	47.1	69.25	14
High	A0A024R454	Carbamoyl-phosphate synthetase 1, mitochondrial, isoform CRA_a OS=Homo sapiens GN=CPS1 PE=3 SV=1	41.513	13.6667	16	17	16	1500	164.8	61.78	16
High	O75369	Filamin-B OS=Homo sapiens GN=FLNB PE=1 SV=2	41.464	12.9131	20	20	19	2602	278	79.3	20
High	P60174	Triosephosphate isomerase OS=Homo sapiens GN=TPI1 PE=1 SV=3	41.334	63.986	13	15	13	286	30.8	63.58	13
High	P10809	60 kDa heat shock protein, mitochondrial OS=Homo sapiens GN=HSPD1 PE=1 SV=2	39.754	34.904	15	15	15	573	61	57.89	15
High	Q04695	Keratin, type I cytoskeletal 17 OS=Homo sapiens GN=KRT17 PE=1 SV=2	39.57	39.1204	18	30	7	432	48.1	87.61	18
High	A0A024R1A3	Testicular secretory protein Li 63 OS=Homo sapiens GN=UBE1 PE=2 SV=1	39.177	23.3459	16	17	16	1058	117.8	69.26	16
High	P30101	Protein disulfide-isomerase A3 OS=Homo sapiens GN=PDIA3 PE=1 SV=4	38.671	37.0297	16	18	16	505	56.7	61.12	16
High	A8K690	cDNA FLJ76863, highly similar to Homo sapiens stress-induced-phosphoprotein 1 (Hsp70/Hsp90-organizing protein) (STIP1), mRNA OS=Homo sapiens PE=2 SV=1	36.701	37.9374	17	20	17	543	62.6	68.3	17
High	A1A4E9	Keratin 13 OS=Homo sapiens GN=KRT13 PE=2 SV=1	35.005	30.786	16	22	6	458	49.6	69.08	16
High	V9HWB4	Epididymis secretory sperm binding protein Li 89n OS=Homo sapiens GN=HEL-S-89n PE=2 SV=1	34.94	23.8532	12	14	11	654	72.3	55.28	12
High	Q06830	Peroxiredoxin-1 OS=Homo sapiens GN=PRDX1 PE=1 SV=1	34.057	64.3216	12	16	10	199	22.1	54.42	12
High	B4E1B2	cDNA FLJ53691, highly similar to Serotransferrin OS=Homo sapiens PE=2 SV=1	33.596	24.0413	13	13	13	678	74.8	46.18	13
High	V9HW31	ATP synthase subunit beta OS=Homo sapiens GN=HEL-S-271 PE=1 SV=1	32.926	33.6484	11	17	11	529	56.5	62.54	11
High	A8K3K1	cDNA FLJ78096, highly similar to Homo sapiens actin, alpha, cardiac muscle (ACTC), mRNA OS=Homo sapiens PE=2 SV=1	32.641	31.565	10	22	2	377	42	64.08	10
High	E9PK25	Cofilin-1 OS=Homo sapiens GN=CFL1 PE=1 SV=1	29.845	50.9804	10	11	8	204	22.7	43.44	10
High	P12035	Keratin, type II cytoskeletal 3 OS=Homo sapiens GN=KRT3 PE=1 SV=3	29.094	19.4268	16	20	3	628	64.4	59.78	16
High	B4DI54	cDNA FLJ56386, highly similar to Heat shock 70 kDa protein 1L OS=Homo sapiens PE=2 SV=1	28.638	16.5957	9	13	1	705	77.5	45.35	9
High	A0A0D9SF53	ATP-dependent RNA helicase DDX3X OS=Homo sapiens GN=DDX3X PE=1 SV=1	28.579	17.7353	11	15	10	733	81.4	50.78	11
High	B7Z809	cDNA FLJ56016, highly similar to C-1-tetrahydrofolate synthase, cytoplasmic OS=Homo sapiens PE=2 SV=1	28.505	14.902	13	13	13	1020	110.4	43.19	13
High	Q5VTI5	Pleckstrin homology domain-containing family A member 6 OS=Homo sapiens GN=PLEKHA6 PE=1 SV=1	28.032	17.3221	13	14	13	1068	119.2	47.71	13
High	P29401	Transketolase OS=Homo sapiens GN=TKT PE=1 SV=3	27.738	28.8925	14	14	14	623	67.8	49.38	14
High	Q14257	Reticulocalbin-2 OS=Homo sapiens GN=RCN2 PE=1 SV=1	27.639	26.4984	8	9	8	317	36.9	34.67	8
High	Q59H77	T-complex protein 1 subunit gamma (Fragment) OS=Homo sapiens PE=2 SV=1	27.471	20.9705	11	13	11	577	63.5	44.19	11
High	P50990	T-complex protein 1 subunit theta OS=Homo sapiens GN=CCT8 PE=1 SV=4	27.191	25.1825	11	11	11	548	59.6	38.15	11
High	P00338	L-lactate dehydrogenase A chain OS=Homo sapiens GN=LDHA PE=1 SV=2	26.803	34.9398	10	13	9	332	36.7	40.39	10
High	A0A024R5Z7	Annexin OS=Homo sapiens GN=ANXA2 PE=3 SV=1	26.332	37.1681	10	11	10	339	38.6	39.19	10
High	Q8N1N4	Keratin, type II cytoskeletal 78 OS=Homo sapiens GN=KRT78 PE=2 SV=2	26.059	23.0769	11	12	10	520	56.8	40.94	11
High	Q9Y446	Plakophilin-3 OS=Homo sapiens GN=PKP3 PE=1 SV=1	25.99	18.4442	11	11	11	797	87	40.67	11
High	Q5D862	Filaggrin-2 OS=Homo sapiens GN=FLG2 PE=1 SV=1	25.782	10.4141	10	12	10	2391	247.9	43.3	10
High	P54652	Heat shock-related 70 kDa protein 2 OS=Homo sapiens GN=HSPA2 PE=1 SV=1	25.77	19.0923	11	13	1	639	70	43.62	11
High	Q96DE0	U8 snoRNA-decapping enzyme OS=Homo sapiens GN=NUDT16 PE=1 SV=2	25.07	44.1026	11	16	11	195	21.3	59.31	11
High	Q53HV2	Chaperonin containing TCP1, subunit 7 (Eta) variant (Fragment) OS=Homo sapiens PE=2 SV=1	24.401	24.1252	10	11	10	543	59.3	39.11	10
High	P05787	Keratin, type II cytoskeletal 8 OS=Homo sapiens GN=KRT8 PE=1 SV=7	24.076	18.4265	13	28	4	483	53.7	90.23	13
High	Q15181	Inorganic pyrophosphatase OS=Homo sapiens GN=PPA1 PE=1 SV=2	24.047	37.3702	9	10	9	289	32.6	38.46	9
High	P62979	Ubiquitin-40S ribosomal protein S27a OS=Homo sapiens GN=RPS27A PE=1 SV=2	23.72	50.641	6	10	6	156	18	35.34	6
High	Q59GY2	Ribosomal protein L4 variant (Fragment) OS=Homo sapiens PE=2 SV=1	23.595	24.0363	10	10	10	441	49	31.26	10
High	O43175	D-3-phosphoglycerate dehydrogenase OS=Homo sapiens GN=PHGDH PE=1 SV=4	23.417	21.2008	8	8	8	533	56.6	32.24	8
High	P07737	Profilin-1 OS=Homo sapiens GN=PFN1 PE=1 SV=2	23.191	63.5714	8	9	8	140	15	32.92	8
High	B2R4R0	Histone H4 OS=Homo sapiens GN=HIST1H4J PE=2 SV=1	23.061	53.3981	8	13	8	103	11.4	44.2	8
High	B2R704	cDNA, FLJ93207, highly similar to Homo sapiens microtubule-associated protein 7 (MAP7), mRNA OS=Homo sapiens PE=2 SV=1	22.355	15.7543	10	10	10	749	83.9	37.18	10
High	V9HWC7	Epididymis secretory sperm binding protein Li 128m OS=Homo sapiens GN=HEL-S-128m PE=2 SV=1	21.945	46.875	9	10	9	224	25	37.32	9
High	A8K8K1	cDNA FLJ76936, highly similar to Homo sapiens RNA terminal phosphate cyclase domain 1 (RTCD1), mRNA OS=Homo sapiens PE=2 SV=1	21.018	31.4208	8	9	8	366	39.3	29.39	8
High	Q9BWF3	RNA-binding protein 4 OS=Homo sapiens GN=RBM4 PE=1 SV=1	20.773	33.5165	9	9	9	364	40.3	30.54	9
High	E9PC69	Non-specific serine/threonine protein kinase OS=Homo sapiens GN=MARK2 PE=1 SV=3	20.616	15.4242	7	7	5	778	86.6	28.47	7
High	Q13835	Plakophilin-1 OS=Homo sapiens GN=PKP1 PE=1 SV=2	20.577	13.3869	7	7	7	747	82.8	26.35	7
High	A8K486	Peptidyl-prolyl cis-trans isomerase OS=Homo sapiens PE=2 SV=1	20.122	52.1212	7	9	7	165	18	32.59	7
High	P07195	L-lactate dehydrogenase B chain OS=Homo sapiens GN=LDHB PE=1 SV=2	20.121	29.6407	10	10	9	334	36.6	30.46	10
High	P29508	Serpin B3 OS=Homo sapiens GN=SERPINB3 PE=1 SV=2	20.092	25.641	7	8	3	390	44.5	27.77	7
High	G8JLB6	Heterogeneous nuclear ribonucleoprotein H OS=Homo sapiens GN=HNRNPH1 PE=1 SV=1	20.091	24.3644	7	9	6	472	51.2	31.33	7
High	P19013	Keratin, type II cytoskeletal 4 OS=Homo sapiens GN=KRT4 PE=1 SV=4	20.016	13.2959	8	21	3	534	57.3	75.37	8
High	Q8N1C8	HSPA9 protein (Fragment) OS=Homo sapiens GN=HSPA9 PE=2 SV=1	19.981	14.5374	7	8	7	681	73.8	32.56	7
High	Q5JR94	40S ribosomal protein S8 OS=Homo sapiens GN=RPS8 PE=2 SV=1	19.766	47.1154	8	9	8	208	24.2	33.92	8
High	P39023	60S ribosomal protein L3 OS=Homo sapiens GN=RPL3 PE=1 SV=2	19.698	29.7767	8	9	8	403	46.1	31.21	8
High	A4QPB0	IQ motif containing GTPase activating protein 1 OS=Homo sapiens GN=IQGAP1 PE=1 SV=1	19.447	6.94025	8	8	8	1657	189.2	28.79	8
High	Q0D2Q6	Phosphoglycerate mutase OS=Homo sapiens GN=PGAM1 PE=2 SV=1	19.434	35.8268	6	7	6	254	28.8	29.63	6
High	P04040	Catalase OS=Homo sapiens GN=CAT PE=1 SV=3	19.163	18.5958	8	8	8	527	59.7	28.13	8
High	O60664	Perilipin-3 OS=Homo sapiens GN=PLIN3 PE=1 SV=3	18.957	24.8848	7	7	7	434	47	28.86	7
High	Q16658	Fascin OS=Homo sapiens GN=FSCN1 PE=1 SV=3	18.556	22.3124	7	7	7	493	54.5	27.76	7
High	A0A024R3E3	Apolipoprotein A-I, isoform CRA_a OS=Homo sapiens GN=APOA1 PE=3 SV=1	18.535	35.5805	9	9	9	267	30.8	26.05	9
High	A8K7F6	cDNA FLJ78244, highly similar to Homo sapiens eukaryotic translation initiation factor 4A, isoform 1 (EIF4A1), mRNA OS=Homo sapiens PE=2 SV=1	18.326	21.9212	7	7	7	406	46.1	25.3	7
High	V9HW43	Epididymis secretory protein Li 102 OS=Homo sapiens GN=HEL-S-102 PE=2 SV=1	18.285	46.3415	6	10	6	205	22.8	40.32	6
High	B4DJ30	cDNA FLJ61290, highly similar to Neutral alpha-glucosidase AB OS=Homo sapiens PE=2 SV=1	18.137	14.0704	9	9	9	995	112.9	31.49	9
High	B3KT93	Polyadenylate-binding protein OS=Homo sapiens PE=2 SV=1	18.057	14.4654	7	7	3	636	70.6	23.06	7
High	K7EMD9	Keratin, type I cytoskeletal 13 (Fragment) OS=Homo sapiens GN=KRT13 PE=1 SV=1	17.914	50.303	10	20	1	165	19.2	57.54	10
High	A0A0G2JMX7	Microtubule-associated protein OS=Homo sapiens GN=MAPT PE=1 SV=1	17.8	13.9175	9	10	9	776	80.9	38.06	9
High	P04083	Annexin A1 OS=Homo sapiens GN=ANXA1 PE=1 SV=2	17.8	29.7688	7	7	7	346	38.7	26.37	7
High	A0A024R8A7	HCG31253, isoform CRA_a OS=Homo sapiens GN=hCG_31253 PE=4 SV=1	17.681	21.8531	7	8	7	572	61.6	31.57	7
High	Q15293	Reticulocalbin-1 OS=Homo sapiens GN=RCN1 PE=1 SV=1	17.591	35.9517	7	7	7	331	38.9	26.33	7
High	A0A0A0MSS8	Aldo-keto reductase family 1 member C3 OS=Homo sapiens GN=AKR1C3 PE=1 SV=1	17.546	22.6006	4	5	4	323	36.8	21.36	4
High	V9HW88	Calreticulin, isoform CRA_b OS=Homo sapiens GN=HEL-S-99n PE=2 SV=1	16.22	21.1031	8	8	8	417	48.1	25.48	8
High	Q0IIN1	Keratin 77 OS=Homo sapiens GN=KRT77 PE=1 SV=1	16.114	10.5536	8	18	3	578	61.8	59.52	8
High	A0A024R8S5	Protein disulfide-isomerase OS=Homo sapiens GN=P4HB PE=2 SV=1	15.95	19.685	9	9	9	508	57.1	28.22	9
High	Q00839	Heterogeneous nuclear ribonucleoprotein U OS=Homo sapiens GN=HNRNPU PE=1 SV=6	15.92	14.4242	8	9	8	825	90.5	29.05	8
High	B2R8Z8	cDNA, FLJ94136, highly similar to Homo sapiens synaptotagmin binding, cytoplasmic RNA interacting protein (SYNCRIP), mRNA OS=Homo sapiens PE=2 SV=1	15.878	14.7673	7	7	7	623	69.6	25.5	7
High	A0A024RAZ7	Heterogeneous nuclear ribonucleoprotein A1, isoform CRA_b OS=Homo sapiens GN=HNRPA1 PE=4 SV=1	15.853	20.6989	5	5	4	372	38.7	20.35	5
High	P62258	14-3-3 protein epsilon OS=Homo sapiens GN=YWHAE PE=1 SV=1	15.835	28.6275	8	8	6	255	29.2	25.66	8
High	Q2Q9B7	Glucose-6-phosphate 1-dehydrogenase (Fragment) OS=Homo sapiens GN=G6PD PE=3 SV=1	15.831	19.5789	7	7	7	475	54.8	24.5	7
High	P15531	Nucleoside diphosphate kinase A OS=Homo sapiens GN=NME1 PE=1 SV=1	15.621	53.2895	6	7	6	152	17.1	28.05	6
High	O14639	Actin-binding LIM protein 1 OS=Homo sapiens GN=ABLIM1 PE=1 SV=3	15.468	12.2108	7	8	7	778	87.6	27.75	7
High	Q6IBN1	HNRPK protein OS=Homo sapiens GN=HNRPK PE=1 SV=1	15.378	24.1379	8	8	8	464	51	26.3	8
High	P26639	Threonine--tRNA ligase, cytoplasmic OS=Homo sapiens GN=TARS PE=1 SV=3	15.378	10.9267	7	9	7	723	83.4	27.66	7
High	B4DR52	Histone H2B OS=Homo sapiens PE=2 SV=1	15.107	27.1084	5	8	2	166	18	29.21	5
High	A0A024R4Q8	Ribosomal protein S5, isoform CRA_a OS=Homo sapiens GN=RPS5 PE=3 SV=1	14.922	32.8431	6	7	6	204	22.9	25.66	6
High	P07814	Bifunctional glutamate/proline--tRNA ligase OS=Homo sapiens GN=EPRS PE=1 SV=5	14.888	8.53175	7	7	7	1512	170.5	26.26	7
High	A0A0A0MT23	Non-specific serine/threonine protein kinase OS=Homo sapiens GN=MARK3 PE=1 SV=1	14.816	15.1394	6	6	4	753	84.4	26.23	6
High	P37802	Transgelin-2 OS=Homo sapiens GN=TAGLN2 PE=1 SV=3	14.696	29.1457	6	9	6	199	22.4	25.14	6
High	P30044	Peroxiredoxin-5, mitochondrial OS=Homo sapiens GN=PRDX5 PE=1 SV=4	14.691	44.8598	7	8	7	214	22.1	28.59	7
High	V9HW80	Epididymis luminal protein 220 OS=Homo sapiens GN=HEL-S-70 PE=2 SV=1	14.608	10.4218	7	7	7	806	89.3	24.24	7
High	P62701	40S ribosomal protein S4, X isoform OS=Homo sapiens GN=RPS4X PE=1 SV=2	14.587	22.0532	5	6	5	263	29.6	20.68	5
High	P08237	ATP-dependent 6-phosphofructokinase, muscle type OS=Homo sapiens GN=PFKM PE=1 SV=2	14.553	10.2564	6	6	4	780	85.1	20.77	6
High	A0A0A0MTS2	Glucose-6-phosphate isomerase (Fragment) OS=Homo sapiens GN=GPI PE=1 SV=1	14.46	11.8674	5	6	5	573	64.8	19	5
High	P34897	Serine hydroxymethyltransferase, mitochondrial OS=Homo sapiens GN=SHMT2 PE=1 SV=3	14.344	12.8968	5	5	5	504	56	18.65	5
High	Q9Y305	Acyl-coenzyme A thioesterase 9, mitochondrial OS=Homo sapiens GN=ACOT9 PE=1 SV=2	14.128	13.6674	6	7	6	439	49.9	19.61	6
High	P16152	Carbonyl reductase [NADPH] 1 OS=Homo sapiens GN=CBR1 PE=1 SV=3	14.1	24.1877	5	5	5	277	30.4	20.14	5
High	A8K7T0	Kynureninase OS=Homo sapiens GN=KYNU PE=2 SV=1	13.951	13.3333	4	5	4	465	52.3	18.35	4
High	B2RA34	cDNA, FLJ94678, highly similar to Homo sapiens BCL2-associated athanogene 4 (BAG4), mRNA OS=Homo sapiens PE=2 SV=1	13.903	18.5996	5	6	5	457	49.6	24.04	5
High	B2R9U2	Peptidylprolyl isomerase OS=Homo sapiens PE=2 SV=1	13.892	15.9041	6	6	6	459	51.8	19.47	6
High	P62424	60S ribosomal protein L7a OS=Homo sapiens GN=RPL7A PE=1 SV=2	13.883	23.6842	6	6	6	266	30	21.91	6
High	P26038	Moesin OS=Homo sapiens GN=MSN PE=1 SV=3	13.882	10.7452	7	8	4	577	67.8	21.95	7
High	B2R6Z3	cDNA, FLJ93192, highly similar to Homo sapiens serine/threonine kinase 6 (STK6), mRNA OS=Homo sapiens PE=2 SV=1	13.863	22.8288	7	8	7	403	45.8	29.46	7
High	P62280	40S ribosomal protein S11 OS=Homo sapiens GN=RPS11 PE=1 SV=3	13.803	34.8101	5	7	5	158	18.4	22.3	5
High	P06899	Histone H2B type 1-J OS=Homo sapiens GN=HIST1H2BJ PE=1 SV=3	13.679	35.7143	4	7	1	126	13.9	26.38	4
High	Q59HH3	Trifunctional purine biosynthetic protein adenosine-3 (Fragment) OS=Homo sapiens PE=2 SV=1	13.396	7.26577	6	6	6	1046	112.1	22.02	6
High	P33316	Deoxyuridine 5'-triphosphate nucleotidohydrolase, mitochondrial OS=Homo sapiens GN=DUT PE=1 SV=4	13.363	30.5556	5	6	5	252	26.5	24.96	5
High	P62633	Cellular nucleic acid-binding protein OS=Homo sapiens GN=CNBP PE=1 SV=1	13.361	35.5932	5	5	5	177	19.5	16.54	5
High	A8KAP9	cDNA FLJ78448, highly similar to Homo sapiens argininosuccinate synthetase (ASS), transcript variant 1, mRNA OS=Homo sapiens PE=2 SV=1	13.334	19.4175	5	5	5	412	46.5	19.51	5
High	V9HW12	Epididymis secretory sperm binding protein Li 2a OS=Homo sapiens GN=HEL-S-2a PE=2 SV=1	13.322	31.8182	5	6	4	198	21.9	22.57	5
High	A0A087WVQ6	Clathrin heavy chain OS=Homo sapiens GN=CLTC PE=1 SV=1	13.294	4.40739	6	6	5	1679	191.9	20.56	6
High	V9HWK2	Epididymis luminal protein 114 OS=Homo sapiens GN=HEL114 PE=2 SV=1	13.288	7.93651	6	6	6	1134	123.7	24.78	6
High	B4E2J5	cDNA FLJ53570, highly similar to Keratin, type I cytoskeletal 16 OS=Homo sapiens PE=2 SV=1	13.243	45.2128	8	17	1	188	21.5	47.71	8
High	Q16881	Thioredoxin reductase 1, cytoplasmic OS=Homo sapiens GN=TXNRD1 PE=1 SV=3	13.236	8.32049	4	5	4	649	70.9	21.32	4
High	P23396	40S ribosomal protein S3 OS=Homo sapiens GN=RPS3 PE=1 SV=2	13.235	31.6872	7	8	7	243	26.7	23.84	7
High	O43707	Alpha-actinin-4 OS=Homo sapiens GN=ACTN4 PE=1 SV=2	13.185	9.65971	7	7	2	911	104.8	24.19	7
High	Q12986	Transcriptional repressor NF-X1 OS=Homo sapiens GN=NFX1 PE=1 SV=2	12.972	7.32143	6	6	6	1120	124.3	18.12	6
High	P46776	60S ribosomal protein L27a OS=Homo sapiens GN=RPL27A PE=1 SV=2	12.941	31.0811	5	5	5	148	16.6	15.99	5
High	A0A087X0X3	Heterogeneous nuclear ribonucleoprotein M OS=Homo sapiens GN=HNRNPM PE=1 SV=1	12.931	8.90411	5	6	5	730	77.5	22.38	5
High	P40925	Malate dehydrogenase, cytoplasmic OS=Homo sapiens GN=MDH1 PE=1 SV=4	12.883	22.7545	6	6	6	334	36.4	20.61	6
High	Q15366	Poly(rC)-binding protein 2 OS=Homo sapiens GN=PCBP2 PE=1 SV=1	12.881	16.4384	4	5	3	365	38.6	21.18	4
High	A0A024R4K3	Malate dehydrogenase OS=Homo sapiens GN=MDH2 PE=2 SV=1	12.843	24.2604	6	7	6	338	35.5	25.56	6
High	Q01813	ATP-dependent 6-phosphofructokinase, platelet type OS=Homo sapiens GN=PFKP PE=1 SV=2	12.751	7.39796	5	8	3	784	85.5	27.92	5
High	P31689	DnaJ homolog subfamily A member 1 OS=Homo sapiens GN=DNAJA1 PE=1 SV=2	12.684	20.9068	5	5	5	397	44.8	20.08	5
High	P05089	Arginase-1 OS=Homo sapiens GN=ARG1 PE=1 SV=2	12.646	21.118	6	6	6	322	34.7	19.55	6
High	B4DH02	cDNA FLJ50510, highly similar to Heat shock 70 kDa protein 4 OS=Homo sapiens PE=2 SV=1	12.629	8.92857	6	6	4	840	94.3	21.72	6
High	P14625	Endoplasmin OS=Homo sapiens GN=HSP90B1 PE=1 SV=1	12.515	8.09465	4	5	3	803	92.4	19.29	4
High	Q53SS8	Epididymis secretory protein Li 85 OS=Homo sapiens GN=PCBP1 PE=2 SV=1	12.319	19.6629	4	5	3	356	37.5	19.79	4
High	P22626	Heterogeneous nuclear ribonucleoproteins A2/B1 OS=Homo sapiens GN=HNRNPA2B1 PE=1 SV=2	12.234	15.864	3	4	2	353	37.4	16.68	3
High	A0A024RBB7	Nucleosome assembly protein 1-like 1, isoform CRA_a OS=Homo sapiens GN=NAP1L1 PE=3 SV=1	12.197	14.578	5	5	4	391	45.3	19.81	5
High	Q6UUV7	CREB-regulated transcription coactivator 3 OS=Homo sapiens GN=CRTC3 PE=1 SV=2	12.185	13.0856	4	4	4	619	66.9	17.43	4
High	Q53ET0	CREB-regulated transcription coactivator 2 OS=Homo sapiens GN=CRTC2 PE=1 SV=2	12.141	13.7085	5	5	5	693	73.3	20.96	5
High	Q08188	Protein-glutamine gamma-glutamyltransferase E OS=Homo sapiens GN=TGM3 PE=1 SV=4	12.089	13.5642	6	6	6	693	76.6	19.6	6
High	B5BUE6	ATP-dependent RNA helicase DDX5 (Fragment) OS=Homo sapiens GN=DDX5 PE=2 SV=1	12.003	6.35179	3	7	1	614	69.1	22.68	3
High	B3KRV2	cDNA FLJ34950 fis, clone NT2RP7017284, highly similar to Casein kinase I isoform epsilon (EC 2.7.11.1) OS=Homo sapiens PE=2 SV=1	11.981	12.7404	4	4	2	416	47.3	14.81	4
High	P47974	mRNA decay activator protein ZFP36L2 OS=Homo sapiens GN=ZFP36L2 PE=1 SV=3	11.848	19.6356	6	7	5	494	51	26.82	6
High	D9IAI1	Epididymis secretory protein Li 34 OS=Homo sapiens GN=PEBP1 PE=2 SV=1	11.794	42.7807	5	5	5	187	21	21.1	5
High	P28074	Proteasome subunit beta type-5 OS=Homo sapiens GN=PSMB5 PE=1 SV=3	11.759	25.8555	6	6	6	263	28.5	18.88	6
High	J3QQ67	60S ribosomal protein L18 (Fragment) OS=Homo sapiens GN=RPL18 PE=1 SV=1	11.665	28.9474	5	5	5	190	21.8	15.38	5
High	V9HVY1	Epididymis secretory sperm binding protein Li 78p OS=Homo sapiens GN=HEL-S-78p PE=2 SV=1	11.626	10.7943	5	5	5	491	55.9	16.64	5
High	P15880	40S ribosomal protein S2 OS=Homo sapiens GN=RPS2 PE=1 SV=2	11.583	20.4778	5	5	5	293	31.3	15.49	5
High	P36952	Serpin B5 OS=Homo sapiens GN=SERPINB5 PE=1 SV=2	11.517	16.8	5	5	5	375	42.1	13.99	5
High	Q5H9Q6	Inosine-5'-monophosphate dehydrogenase OS=Homo sapiens GN=DKFZp781N0678 PE=2 SV=1	11.438	9.84975	5	6	3	599	64.5	21.46	5
High	A0A1B1RVA9	Lipoprotein lipase OS=Homo sapiens GN=LPL PE=3 SV=1	11.416	10.5263	3	3	3	475	53.1	13.94	3
High	Q6KB66	Keratin, type II cytoskeletal 80 OS=Homo sapiens GN=KRT80 PE=1 SV=2	11.4	11.5044	5	15	4	452	50.5	55.04	5
High	Q6P2H3	Centrosomal protein of 85 kDa OS=Homo sapiens GN=CEP85 PE=1 SV=1	11.356	8.26772	5	6	5	762	85.6	19.96	5
High	P23526	Adenosylhomocysteinase OS=Homo sapiens GN=AHCY PE=1 SV=4	11.302	12.7315	5	5	5	432	47.7	17.2	5
High	Q06203	Amidophosphoribosyltransferase OS=Homo sapiens GN=PPAT PE=1 SV=1	11.302	14.5068	6	6	6	517	57.4	20.37	6
High	Q15084	Protein disulfide-isomerase A6 OS=Homo sapiens GN=PDIA6 PE=1 SV=1	11.262	15.6818	5	5	5	440	48.1	16.85	5
High	P49588	Alanine--tRNA ligase, cytoplasmic OS=Homo sapiens GN=AARS PE=1 SV=2	11.247	7.74793	5	5	5	968	106.7	20.3	5
High	B2RBR9	cDNA, FLJ95650, highly similar to Homo sapiens karyopherin (importin) beta 1 (KPNB1), mRNA OS=Homo sapiens PE=2 SV=1	11.236	7.19178	5	5	5	876	97.1	17.95	5
High	Q08554	Desmocollin-1 OS=Homo sapiens GN=DSC1 PE=1 SV=2	11.152	8.61298	5	6	5	894	99.9	23.84	5
High	A8K259	cDNA FLJ78501, highly similar to Homo sapiens serpin peptidase inhibitor, clade H (heat shock protein 47), member 1, (collagen binding protein 1) (SERPINH1), mRNA OS=Homo sapiens PE=2 SV=1	11.149	15.5502	5	5	5	418	46.5	18.77	5
High	A0A024R7T3	Heterogeneous nuclear ribonucleoprotein F, isoform CRA_a OS=Homo sapiens GN=HNRPF PE=4 SV=1	11.147	13.253	5	7	4	415	45.6	19.29	5
High	O75420	PERQ amino acid-rich with GYF domain-containing protein 1 OS=Homo sapiens GN=GIGYF1 PE=1 SV=2	11.125	5.50725	3	4	3	1035	114.5	21.15	3
High	I3L504	Eukaryotic translation initiation factor 5A-1 OS=Homo sapiens GN=EIF5A PE=1 SV=1	11.097	20.9677	4	6	4	186	20.5	19.92	4
High	F8W1S1	Keratin, type II cytoskeletal 74 OS=Homo sapiens GN=KRT74 PE=1 SV=1	11.045	7.73481	6	7	1	543	59.4	20.78	6
High	Q15323	Keratin, type I cuticular Ha1 OS=Homo sapiens GN=KRT31 PE=1 SV=3	11.043	13.2212	6	13	4	416	47.2	34.01	6
High	Q9HBB3	60S ribosomal protein L6 OS=Homo sapiens PE=2 SV=1	10.993	20.0692	5	5	5	289	32.9	14.47	5
High	P12814	Alpha-actinin-1 OS=Homo sapiens GN=ACTN1 PE=1 SV=2	10.957	9.19283	7	7	2	892	103	22.67	7
High	A0A024RD93	Phosphoribosylaminoimidazole carboxylase, phosphoribosylaminoimidazole succinocarboxamide synthetase, isoform CRA_c OS=Homo sapiens GN=PAICS PE=3 SV=1	10.876	13.1765	5	6	5	425	47	23.31	5
High	V9HWA9	Epididymis secretory sperm binding protein Li 62p OS=Homo sapiens GN=HEL-S-62p PE=2 SV=1	10.844	3.9086	5	5	5	1663	187	16.63	5
High	Q4VXU2	Polyadenylate-binding protein 1-like OS=Homo sapiens GN=PABPC1L PE=2 SV=1	10.824	7.98046	4	4	1	614	68.3	13.78	4
High	Q5T749	Keratinocyte proline-rich protein OS=Homo sapiens GN=KPRP PE=1 SV=1	10.643	12.7807	5	5	5	579	64.1	16.73	5
High	Q5K634	SCCA2/SCCA1 fusion protein isoform 1 OS=Homo sapiens PE=2 SV=1	10.636	17.1795	5	6	1	390	44.6	19.97	5
High	A8K7D9	Importin subunit alpha OS=Homo sapiens PE=2 SV=1	10.457	13.7996	5	6	5	529	57.8	22.59	5
High	P67809	Nuclease-sensitive element-binding protein 1 OS=Homo sapiens GN=YBX1 PE=1 SV=3	10.435	16.0494	4	4	4	324	35.9	13.34	4
High	Q53HB3	Proteasome 26S ATPase subunit 1 variant (Fragment) OS=Homo sapiens PE=1 SV=1	10.392	13.1818	5	5	4	440	49.2	16.58	5
High	P23921	Ribonucleoside-diphosphate reductase large subunit OS=Homo sapiens GN=RRM1 PE=1 SV=1	10.371	7.19697	4	4	4	792	90	14.79	4
High	B2R9S4	cDNA, FLJ94534, highly similar to Homo sapiens capping protein (actin filament), gelsolin-like(CAPG), mRNA OS=Homo sapiens PE=2 SV=1	10.349	14.6552	3	3	3	348	38.5	13.21	3
High	J3KQE5	GTP-binding nuclear protein Ran (Fragment) OS=Homo sapiens GN=RAN PE=1 SV=1	10.313	19.2308	4	4	4	234	26.8	12.85	4
High	Q7Z351	Putative uncharacterized protein DKFZp686N02209 OS=Homo sapiens GN=DKFZp686N02209 PE=2 SV=1	10.013	15.7676	6	6	6	482	52.8	19.22	6
High	V9HW26	ATP synthase subunit alpha OS=Homo sapiens GN=HEL-S-123m PE=2 SV=1	10.006	10.1266	5	5	5	553	59.7	15.81	5
High	G3V5Z7	Proteasome subunit alpha type OS=Homo sapiens GN=PSMA6 PE=1 SV=1	10.003	21.8254	5	5	5	252	28.1	15.57	5
High	E7EX29	14-3-3 protein zeta/delta (Fragment) OS=Homo sapiens GN=YWHAZ PE=1 SV=1	9.987	21.5447	5	5	3	246	28	15.47	5
High	A0A1B0GU03	Uncharacterized protein OS=Homo sapiens PE=1 SV=1	9.957	8.76289	5	5	5	582	62.7	16.42	5
High	Q96RG5	Insulin receptor substrate 2 insertion mutant (Fragment) OS=Homo sapiens GN=IRS2 PE=4 SV=1	9.781	4.48096	4	4	4	1339	137.3	13.04	4
High	Q99497	Protein deglycase DJ-1 OS=Homo sapiens GN=PARK7 PE=1 SV=2	9.661	33.3333	4	7	4	189	19.9	22.71	4
High	A0A024RDS1	Heat shock 105kDa/110kDa protein 1, isoform CRA_c OS=Homo sapiens GN=HSPH1 PE=3 SV=1	9.649	7.57576	5	5	3	858	96.8	17.13	5
High	Q86SQ0	Pleckstrin homology-like domain family B member 2 OS=Homo sapiens GN=PHLDB2 PE=1 SV=2	9.638	5.50678	4	4	4	1253	142.1	15.67	4
High	A0A024RDR0	High-mobility group box 1, isoform CRA_a OS=Homo sapiens GN=HMGB1 PE=4 SV=1	9.619	27.4419	4	4	4	215	24.9	16.5	4
High	E9PAU2	Ribonucleoprotein PTB-binding 1 OS=Homo sapiens GN=RAVER1 PE=1 SV=1	9.598	9.92063	3	3	3	756	79.5	16.08	3
High	Q6IQ30	Polyadenylate-binding protein OS=Homo sapiens GN=PABPC4 PE=2 SV=1	9.54	6.21212	3	3	1	660	72.3	11.38	3
High	Q59GX9	Ribosomal protein L5 variant (Fragment) OS=Homo sapiens PE=2 SV=1	9.537	17.8218	4	4	4	303	35.2	15.63	4
High	Q96P63	Serpin B12 OS=Homo sapiens GN=SERPINB12 PE=1 SV=1	9.511	9.1358	3	4	3	405	46.2	14.61	3
High	Q59F66	DEAD box polypeptide 17 isoform p82 variant (Fragment) OS=Homo sapiens PE=2 SV=1	9.501	4.07056	3	6	1	737	81	18.64	3
High	P54819	Adenylate kinase 2, mitochondrial OS=Homo sapiens GN=AK2 PE=1 SV=2	9.5	17.9916	3	3	3	239	26.5	12.35	3
High	H9ZYJ2	Thioredoxin OS=Homo sapiens GN=TXN PE=2 SV=1	9.427	46.6667	3	4	3	105	11.7	13.75	3
High	Q14204	Cytoplasmic dynein 1 heavy chain 1 OS=Homo sapiens GN=DYNC1H1 PE=1 SV=5	9.352	1.42058	5	5	5	4646	532.1	16.78	5
High	E9KL35	Epididymis tissue sperm binding protein Li 3a OS=Homo sapiens PE=1 SV=1	9.303	20.1893	4	4	4	317	35.1	13.57	4
High	Q06210	Glutamine--fructose-6-phosphate aminotransferase [isomerizing] 1 OS=Homo sapiens GN=GFPT1 PE=1 SV=3	9.293	9.15594	5	5	5	699	78.8	16.73	5
High	B4DS05	cDNA FLJ59403, highly similar to Nucleosome assembly protein 1-like 4 OS=Homo sapiens PE=2 SV=1	9.291	8.29016	4	4	3	386	44.1	14.74	4
High	P17812	CTP synthase 1 OS=Homo sapiens GN=CTPS1 PE=1 SV=2	9.285	9.47547	4	4	4	591	66.6	13.31	4
High	A8K651	cDNA FLJ75700, highly similar to Homo sapiens complement component 1, q subcomponent binding protein (C1QBP), nuclear gene encoding mitochondrial protein, mRNA OS=Homo sapiens PE=2 SV=1	9.211	14.8936	3	4	3	282	31.4	15.98	3
High	Q9BRA2	Thioredoxin domain-containing protein 17 OS=Homo sapiens GN=TXNDC17 PE=1 SV=1	9.103	38.2114	4	4	4	123	13.9	12.08	4
High	A0A024R755	Calumenin, isoform CRA_a OS=Homo sapiens GN=CALU PE=4 SV=1	9.029	21.2698	5	5	5	315	37.1	17.03	5
High	Q8TCD0	Uncharacterized protein OS=Homo sapiens PE=1 SV=1	9.014	20.5021	3	4	3	239	26.2	15.75	3
High	P52209	6-phosphogluconate dehydrogenase, decarboxylating OS=Homo sapiens GN=PGD PE=1 SV=3	9.011	12.0083	4	4	4	483	53.1	13.97	4
High	Q9UGM3	Deleted in malignant brain tumors 1 protein OS=Homo sapiens GN=DMBT1 PE=1 SV=2	8.996	15.9138	3	3	3	2413	260.6	11.06	3
High	P83731	60S ribosomal protein L24 OS=Homo sapiens GN=RPL24 PE=1 SV=1	8.962	28.6624	5	5	5	157	17.8	14.42	5
High	P00738	Haptoglobin OS=Homo sapiens GN=HP PE=1 SV=1	8.957	14.7783	5	5	5	406	45.2	18.65	5
High	A0A024R3W7	Eukaryotic translation elongation factor 1 beta 2, isoform CRA_a OS=Homo sapiens GN=EEF1B2 PE=3 SV=1	8.937	16.4444	3	3	3	225	24.7	11.52	3
High	P26373	60S ribosomal protein L13 OS=Homo sapiens GN=RPL13 PE=1 SV=4	8.872	16.1137	3	4	3	211	24.2	15.23	3
High	B4DLV7	Rab GDP dissociation inhibitor OS=Homo sapiens PE=2 SV=1	8.83	7.57238	2	2	2	449	51.1	10.08	2
High	P60891	Ribose-phosphate pyrophosphokinase 1 OS=Homo sapiens GN=PRPS1 PE=1 SV=2	8.781	14.1509	3	3	3	318	34.8	11.15	3
High	P81605	Dermcidin OS=Homo sapiens GN=DCD PE=1 SV=2	8.78	22.7273	3	3	3	110	11.3	11.79	3
High	B2R4C0	60S ribosomal protein L18a OS=Homo sapiens PE=2 SV=1	8.71	25.5682	4	4	4	176	20.7	14.15	4
High	B5BU24	14-3-3 protein beta/alpha OS=Homo sapiens GN=YWHAB PE=2 SV=1	8.699	22.7642	5	5	2	246	28.1	14.63	5
High	Q96PK6	RNA-binding protein 14 OS=Homo sapiens GN=RBM14 PE=1 SV=2	8.664	6.87593	4	4	4	669	69.4	11.98	4
High	B3KUY2	Prostaglandin E synthase 3 (Cytosolic), isoform CRA_c OS=Homo sapiens GN=PTGES3 PE=2 SV=1	8.61	24.2424	3	4	3	165	19.4	14.26	3
High	A0A024R1V4	60S ribosomal protein L27 OS=Homo sapiens GN=RPL27 PE=3 SV=1	8.577	29.4118	3	4	3	136	15.8	12.23	3
High	E9PCR7	2-oxoglutarate dehydrogenase, mitochondrial OS=Homo sapiens GN=OGDH PE=1 SV=1	8.563	4.62428	4	4	4	1038	117.6	12.3	4
High	A0A024R1Q8	Ribosomal protein L23, isoform CRA_b OS=Homo sapiens GN=RPL23 PE=3 SV=1	8.55	43.5714	5	9	5	140	14.9	30.42	5
High	A0A024R9W5	HECT, UBA and WWE domain containing 1, isoform CRA_b OS=Homo sapiens GN=HUWE1 PE=4 SV=1	8.531	1.71468	5	5	5	4374	481.6	18	5
High	P26447	Protein S100-A4 OS=Homo sapiens GN=S100A4 PE=1 SV=1	8.467	27.7228	3	5	3	101	11.7	14.75	3
High	A4D1G5	40S ribosomal protein S27 OS=Homo sapiens GN=LOC392748 PE=3 SV=1	8.314	14.1892	2	3	2	148	16.9	10.7	2
High	P08729	Keratin, type II cytoskeletal 7 OS=Homo sapiens GN=KRT7 PE=1 SV=5	8.312	7.03625	4	15	1	469	51.4	53.26	4
High	Q6N092	Putative uncharacterized protein DKFZp686K18196 (Fragment) OS=Homo sapiens GN=DKFZp686K18196 PE=2 SV=1	8.297	7.12909	3	3	2	519	56.4	10.97	3
High	Q6IPH7	RPL14 protein OS=Homo sapiens GN=RPL14 PE=1 SV=1	8.276	15.4545	3	4	1	220	23.8	12.37	3
High	P25398	40S ribosomal protein S12 OS=Homo sapiens GN=RPS12 PE=1 SV=3	8.257	26.5152	3	3	3	132	14.5	11.11	3
High	B7Z6Z4	Myosin light polypeptide 6 OS=Homo sapiens GN=MYL6 PE=1 SV=1	8.239	17.2269	4	4	4	238	26.7	12.42	4
High	Q4LE36	ACLY variant protein (Fragment) OS=Homo sapiens GN=ACLY variant protein PE=2 SV=1	8.238	5.7168	5	6	5	1137	124.5	20.61	5
High	P62888	60S ribosomal protein L30 OS=Homo sapiens GN=RPL30 PE=1 SV=2	8.181	40.8696	3	3	3	115	12.8	13.71	3
High	Q53GE7	Tetratricopeptide repeat domain 1 variant (Fragment) OS=Homo sapiens PE=2 SV=1	8.173	11.6438	3	3	3	292	33.6	9.8	3
High	K7PML8	Cyclin-dependent kinase inhibitor 2A OS=Homo sapiens GN=CDKN2A PE=2 SV=1	8.145	18.5897	2	2	2	156	16.5	8.9	2
High	B2R6J2	cDNA, FLJ92973, highly similar to Homo sapiens villin 2 (ezrin) (VIL2), mRNA OS=Homo sapiens PE=2 SV=1	8.128	6.48464	4	4	1	586	69.4	12.26	4
High	P17987	T-complex protein 1 subunit alpha OS=Homo sapiens GN=TCP1 PE=1 SV=1	8.116	7.73381	4	4	4	556	60.3	13.39	4
High	A0A158RFU6	RAB7, member RAS oncogene family, isoform CRA_a OS=Homo sapiens GN=RAB7A PE=2 SV=1	8.032	18.8406	3	3	3	207	23.5	12.04	3
High	Q9P2B7	Cilia- and flagella-associated protein 97 OS=Homo sapiens GN=CFAP97 PE=1 SV=2	8.026	14.2857	5	5	5	532	59.4	16.34	5
High	A0A024R0Q5	Protein phosphatase 1, regulatory (Inhibitor) subunit 13 like, isoform CRA_a OS=Homo sapiens GN=PPP1R13L PE=4 SV=1	7.999	6.40097	3	3	3	828	89	12.77	3
High	J3QQX2	Rho GDP-dissociation inhibitor 1 OS=Homo sapiens GN=ARHGDIA PE=1 SV=1	7.988	5.95745	2	3	2	235	25.8	10.21	2
High	A0A1B0GW77	Alpha-aminoadipic semialdehyde dehydrogenase OS=Homo sapiens GN=ALDH7A1 PE=1 SV=1	7.972	11.3718	4	5	4	554	60	17.85	4
High	P38606	V-type proton ATPase catalytic subunit A OS=Homo sapiens GN=ATP6V1A PE=1 SV=2	7.946	7.13128	3	4	3	617	68.3	14.22	3
High	P27348	14-3-3 protein theta OS=Homo sapiens GN=YWHAQ PE=1 SV=1	7.925	19.5918	5	5	2	245	27.7	12.75	5
High	Q59EH3	Acid phosphatase 1 isoform c variant (Fragment) OS=Homo sapiens PE=2 SV=1	7.916	23.6364	3	4	3	165	18.7	13.19	3
High	Q5VWC4	26S proteasome non-ATPase regulatory subunit 4 OS=Homo sapiens GN=PSMD4 PE=1 SV=1	7.872	10.5263	3	3	3	380	41.1	11.66	3
High	Q9H4F8	SPARC-related modular calcium-binding protein 1 OS=Homo sapiens GN=SMOC1 PE=1 SV=1	7.772	11.0599	4	4	4	434	48.1	11.66	4
High	A0A0U1RRH7	Histone H2A OS=Homo sapiens PE=3 SV=1	7.731	26.4706	3	3	3	170	18.5	11.98	3
High	P78328	HP47 protein (Fragment) OS=Homo sapiens PE=2 SV=1	7.714	46.1538	3	3	3	78	8.7	11.43	3
High	O15371	Eukaryotic translation initiation factor 3 subunit D OS=Homo sapiens GN=EIF3D PE=1 SV=1	7.707	9.12409	3	4	3	548	63.9	15.42	3
High	P02671	Fibrinogen alpha chain OS=Homo sapiens GN=FGA PE=1 SV=2	7.696	7.27483	4	4	4	866	94.9	15.05	4
High	Q9UGN5	Poly [ADP-ribose] polymerase 2 OS=Homo sapiens GN=PARP2 PE=1 SV=2	7.688	6.51801	2	2	2	583	66.2	7.81	2
High	Q59G24	Activated RNA polymerase II transcription cofactor 4 variant (Fragment) OS=Homo sapiens PE=2 SV=1	7.645	24.6269	3	3	3	134	15.1	11.88	3
High	M0R2B7	DNA polymerase OS=Homo sapiens GN=POLD1 PE=1 SV=1	7.628	5.20741	4	4	4	1133	126.3	14.85	4
High	Q53HU7	Eukaryotic translation initiation factor 3 subunit I (Fragment) OS=Homo sapiens PE=2 SV=1	7.624	12	3	3	3	325	36.5	10.18	3
High	P51970	NADH dehydrogenase [ubiquinone] 1 alpha subcomplex subunit 8 OS=Homo sapiens GN=NDUFA8 PE=1 SV=3	7.618	21.5116	3	3	3	172	20.1	9.34	3
High	P31939	Bifunctional purine biosynthesis protein PURH OS=Homo sapiens GN=ATIC PE=1 SV=3	7.607	9.12162	4	4	4	592	64.6	13.4	4
High	A2A3R6	40S ribosomal protein S6 OS=Homo sapiens GN=RPS6 PE=2 SV=1	7.574	15.6627	3	3	3	249	28.7	10.82	3
High	I1SRC5	UBE2L3/KRAS fusion protein OS=Homo sapiens PE=2 SV=1	7.566	11.1486	2	2	2	296	34	8.65	2
High	P49721	Proteasome subunit beta type-2 OS=Homo sapiens GN=PSMB2 PE=1 SV=1	7.55	17.9104	3	3	3	201	22.8	9.71	3
High	P19623	Spermidine synthase OS=Homo sapiens GN=SRM PE=1 SV=1	7.492	14.2384	3	3	3	302	33.8	8.68	3
High	A0A024R8P8	Ribosomal protein L38, isoform CRA_a OS=Homo sapiens GN=RPL38 PE=3 SV=1	7.43	35.7143	3	3	3	70	8.2	9.82	3
High	P62263	40S ribosomal protein S14 OS=Homo sapiens GN=RPS14 PE=1 SV=3	7.429	27.8146	3	3	3	151	16.3	12.6	3
High	Q08J23	tRNA (cytosine(34)-C(5))-methyltransferase OS=Homo sapiens GN=NSUN2 PE=1 SV=2	7.422	5.47588	3	3	3	767	86.4	11.48	3
High	Q9NRR5	Ubiquilin-4 OS=Homo sapiens GN=UBQLN4 PE=1 SV=2	7.41	9.98336	3	3	2	601	63.8	14.33	3
High	A0A024R2Q4	Ribosomal protein L15 OS=Homo sapiens GN=RPL15 PE=3 SV=1	7.386	17.1569	4	4	4	204	24.1	11.25	4
High	E9PRY8	Elongation factor 1-delta OS=Homo sapiens GN=EEF1D PE=1 SV=1	7.367	7.03013	3	3	3	697	76.5	10.99	3
High	V9HW87	Abhydrolase domain containing 14B, isoform CRA_a OS=Homo sapiens GN=HEL-S-299 PE=2 SV=1	7.357	18.0952	3	3	3	210	22.3	8.56	3
High	A8K4W0	40S ribosomal protein S3a OS=Homo sapiens GN=RPS3A PE=2 SV=1	7.331	14.0152	4	4	4	264	29.9	11.09	4
High	Q16576	Histone-binding protein RBBP7 OS=Homo sapiens GN=RBBP7 PE=1 SV=1	7.329	10.1176	4	4	4	425	47.8	10.15	4
High	A8K0T9	cDNA FLJ75422, highly similar to Homo sapiens capping protein (actin filament) muscle Z-line, alpha 1, mRNA OS=Homo sapiens PE=2 SV=1	7.273	15.035	3	3	3	286	32.9	11.66	3
High	A0A024R718	Pre-B-cell colony enhancing factor 1, isoform CRA_a OS=Homo sapiens GN=PBEF1 PE=4 SV=1	7.273	7.94297	4	4	4	491	55.5	11.15	4
High	P31947	14-3-3 protein sigma OS=Homo sapiens GN=SFN PE=1 SV=1	7.216	18.1452	5	5	2	248	27.8	12.23	5
High	P56537	Eukaryotic translation initiation factor 6 OS=Homo sapiens GN=EIF6 PE=1 SV=1	7.203	13.0612	2	2	2	245	26.6	8.82	2
High	A0A0S2Z3F2	V-raf murine sarcoma 3611 viral oncogene-like protein isoform 2 (Fragment) OS=Homo sapiens GN=ARAF PE=2 SV=1	7.193	6.71031	4	4	4	611	68	11.17	4
High	B2RA03	cDNA, FLJ94640, highly similar to Homo sapiens keratin 18 (KRT18), mRNA OS=Homo sapiens PE=2 SV=1	7.183	7.90698	4	11	3	430	48	27.28	4
High	B2R4M6	Protein S100 OS=Homo sapiens PE=2 SV=1	7.18	24.5614	2	3	2	114	13.2	10.85	2
High	P36871	Phosphoglucomutase-1 OS=Homo sapiens GN=PGM1 PE=1 SV=3	7.157	8.54093	4	4	4	562	61.4	12.43	4
High	B3KQF4	cDNA FLJ90373 fis, clone NT2RP2004606, highly similar to Metalloproteinase inhibitor 1 OS=Homo sapiens PE=2 SV=1	7.141	20.2899	3	3	3	207	23.2	10.02	3
High	P55786	Puromycin-sensitive aminopeptidase OS=Homo sapiens GN=NPEPPS PE=1 SV=2	7.094	5.11425	4	4	4	919	103.2	14.6	4
High	Q9C075	Keratin, type I cytoskeletal 23 OS=Homo sapiens GN=KRT23 PE=1 SV=2	7.025	6.63507	3	4	1	422	48.1	12.05	3
High	A0A087X2I1	26S protease regulatory subunit 10B OS=Homo sapiens GN=PSMC6 PE=1 SV=1	7.007	13.6476	4	4	4	403	45.8	15.31	4
High	P30050	60S ribosomal protein L12 OS=Homo sapiens GN=RPL12 PE=1 SV=1	6.954	27.8788	3	4	3	165	17.8	16.67	3
High	B4DJQ5	cDNA FLJ59211, highly similar to Glucosidase 2 subunit beta OS=Homo sapiens PE=2 SV=1	6.942	5.60748	3	3	3	535	60.1	8.5	3
High	Q76LA1	CSTB protein OS=Homo sapiens GN=CSTB PE=2 SV=1	6.938	24.4898	2	2	2	98	11.1	7.74	2
High	P61513	60S ribosomal protein L37a OS=Homo sapiens GN=RPL37A PE=1 SV=2	6.924	41.3043	3	3	3	92	10.3	10.04	3
High	A8K3Q9	cDNA FLJ76611, highly similar to Homo sapiens ribosomal protein L14 (RPL14), mRNA OS=Homo sapiens PE=1 SV=1	6.91	16.6667	3	4	1	216	23.4	13.64	3
High	A0A024R374	Cathepsin B, isoform CRA_a OS=Homo sapiens GN=CTSB PE=3 SV=1	6.908	13.5693	3	3	3	339	37.8	10.57	3
High	A0A024R8N6	Thymidine kinase OS=Homo sapiens GN=TK1 PE=3 SV=1	6.877	14.8551	3	3	3	276	29.9	9.94	3
High	Q13838	Spliceosome RNA helicase DDX39B OS=Homo sapiens GN=DDX39B PE=1 SV=1	6.866	9.57944	4	5	4	428	49	14.14	4
High	B2RDI5	cDNA, FLJ96627, highly similar to Homo sapiens calpain 1, (mu/I) large subunit (CAPN1), mRNA OS=Homo sapiens PE=2 SV=1	6.843	7.14286	4	4	4	714	81.8	13.85	4
High	P62906	60S ribosomal protein L10a OS=Homo sapiens GN=RPL10A PE=1 SV=2	6.843	17.0507	4	4	4	217	24.8	10.86	4
High	A0A0C4DFU2	Superoxide dismutase OS=Homo sapiens GN=SOD2 PE=1 SV=1	6.749	19.3694	3	3	3	222	24.7	11.01	3
High	A0A024R6W0	Aspartate aminotransferase OS=Homo sapiens GN=GOT2 PE=4 SV=1	6.726	8.13953	3	3	3	430	47.4	11.39	3
High	O60716	Catenin delta-1 OS=Homo sapiens GN=CTNND1 PE=1 SV=1	6.697	4.44215	3	3	3	968	108.1	9.88	3
High	P25685	DnaJ homolog subfamily B member 1 OS=Homo sapiens GN=DNAJB1 PE=1 SV=4	6.657	11.1765	3	3	3	340	38	10.12	3
High	P39687	Acidic leucine-rich nuclear phosphoprotein 32 family member A OS=Homo sapiens GN=ANP32A PE=1 SV=1	6.645	16.0643	3	3	2	249	28.6	10.27	3
High	A8K8N7	Phosphoribosylformylglycinamidine synthase (FGAR amidotransferase), isoform CRA_b OS=Homo sapiens GN=PFAS PE=2 SV=1	6.641	2.46637	3	3	3	1338	144.6	9.11	3
High	E5KQF6	Glucocorticoid receptor OS=Homo sapiens GN=NR3C1 PE=3 SV=1	6.625	7.19794	3	3	3	778	85.8	11.84	3
High	Q59ET0	Glucan, branching enzyme 1 variant (Fragment) OS=Homo sapiens PE=2 SV=1	6.612	5.70292	3	3	3	754	86.1	10.57	3
High	B7Z3K9	Fructose-bisphosphate aldolase OS=Homo sapiens PE=2 SV=1	6.583	11.3082	3	4	1	451	48.4	16.63	3
High	B2R9K8	cDNA, FLJ94440, highly similar to Homo sapiens chaperonin containing TCP1, subunit 6A (zeta 1)(CCT6A), mRNA OS=Homo sapiens PE=2 SV=1	6.575	7.72128	3	3	3	531	57.9	11.75	3
High	H7BYT1	Casein kinase I isoform delta OS=Homo sapiens GN=CSNK1D PE=1 SV=2	6.571	8.8993	3	3	1	427	49	10.48	3
High	Q9UHD9	Ubiquilin-2 OS=Homo sapiens GN=UBQLN2 PE=1 SV=2	6.564	7.85256	3	3	2	624	65.7	14.21	3
High	A0A024R6S1	DnaJ (Hsp40) homolog, subfamily A, member 2, isoform CRA_a OS=Homo sapiens GN=DNAJA2 PE=3 SV=1	6.563	10.6796	4	4	4	412	45.7	13.04	4
High	P38159	RNA-binding motif protein, X chromosome OS=Homo sapiens GN=RBMX PE=1 SV=3	6.551	13.0435	4	5	4	391	42.3	16.3	4
High	B3KRM2	Serine/threonine-protein phosphatase OS=Homo sapiens PE=2 SV=1	6.545	12.945	2	3	2	309	35.5	13.94	2
High	A8K492	cDNA FLJ76789, highly similar to Homo sapiens methionine-tRNA synthetase (MARS), mRNA OS=Homo sapiens PE=2 SV=1	6.502	4.77778	3	3	3	900	101.1	10.73	3
High	Q6GMX3	IGL@ protein OS=Homo sapiens GN=IGL@ PE=2 SV=1	6.489	16.9492	3	3	3	236	24.7	9.86	3
High	Q9UKK3	Poly [ADP-ribose] polymerase 4 OS=Homo sapiens GN=PARP4 PE=1 SV=3	6.483	2.14617	3	3	3	1724	192.5	10.89	3
High	B2RDY9	Adenylyl cyclase-associated protein OS=Homo sapiens PE=2 SV=1	6.478	9.89474	3	4	3	475	51.6	15.97	3
High	V9HW91	Epididymis secretory sperm binding protein Li 8a OS=Homo sapiens GN=HEL-S-8a PE=2 SV=1	6.468	9.42029	2	2	2	276	30.6	8.17	2
High	Q92688	Acidic leucine-rich nuclear phosphoprotein 32 family member B OS=Homo sapiens GN=ANP32B PE=1 SV=1	6.396	15.9363	3	3	2	251	28.8	10.9	3
High	V9HWG3	Epididymis secretory protein Li 45 OS=Homo sapiens GN=HEL-S-45 PE=2 SV=1	6.387	4.51237	2	2	2	687	77.3	7.18	2
High	P50213	Isocitrate dehydrogenase [NAD] subunit alpha, mitochondrial OS=Homo sapiens GN=IDH3A PE=1 SV=1	6.374	11.7486	4	4	4	366	39.6	11.78	4
High	Q59FZ4	Serine/threonine kinase 4 variant (Fragment) OS=Homo sapiens PE=2 SV=1	6.362	5.28376	2	2	2	511	57.8	8.22	2
High	A0A0S2Z471	Creatine kinase brain isoform 2 (Fragment) OS=Homo sapiens GN=CKB PE=2 SV=1	6.359	12.3457	3	3	3	405	44.9	12.52	3
High	A8K517	Ribosomal protein S23, isoform CRA_a OS=Homo sapiens GN=RPS23 PE=2 SV=1	6.259	21.6783	3	3	3	143	15.8	10.86	3
High	Q13470	Non-receptor tyrosine-protein kinase TNK1 OS=Homo sapiens GN=TNK1 PE=1 SV=3	6.252	4.5045	3	3	3	666	72.4	8.9	3
High	Q05D08	PA2G4 protein (Fragment) OS=Homo sapiens GN=PA2G4 PE=2 SV=1	6.221	9.85222	3	3	3	406	45.1	9.46	3
High	P19338	Nucleolin OS=Homo sapiens GN=NCL PE=1 SV=3	6.22	6.05634	3	4	3	710	76.6	13.12	3
High	J7M2B1	Tyrosine-protein kinase receptor OS=Homo sapiens GN=EZR-ROS1 PE=2 SV=1	6.211	3.84615	4	4	1	858	98.9	10.42	4
High	O14545	TRAF-type zinc finger domain-containing protein 1 OS=Homo sapiens GN=TRAFD1 PE=1 SV=1	6.168	5.32646	3	3	3	582	64.8	9.59	3
High	P61626	Lysozyme C OS=Homo sapiens GN=LYZ PE=1 SV=1	6.158	18.9189	3	3	3	148	16.5	6.41	3
High	B9EKV4	Aldehyde dehydrogenase 9 family, member A1 OS=Homo sapiens GN=ALDH9A1 PE=2 SV=1	6.14	7.14286	3	3	3	518	56.3	10.61	3
High	A0A024R6I7	Alpha-1-antitrypsin OS=Homo sapiens GN=SERPINA1 PE=1 SV=1	6.132	8.61244	3	3	3	418	46.7	9.66	3
High	Q14247	Src substrate cortactin OS=Homo sapiens GN=CTTN PE=1 SV=2	6.11	5.81818	3	3	3	550	61.5	9.46	3
High	Q14157	Ubiquitin-associated protein 2-like OS=Homo sapiens GN=UBAP2L PE=1 SV=2	6.075	4.04784	3	3	3	1087	114.5	10.5	3
High	M0R0H3	mRNA decay activator protein ZFP36 (Fragment) OS=Homo sapiens GN=ZFP36 PE=1 SV=1	6.058	11.3703	3	3	2	343	35.7	9.73	3
High	P62913	60S ribosomal protein L11 OS=Homo sapiens GN=RPL11 PE=1 SV=2	5.988	12.9213	2	2	2	178	20.2	7.01	2
High	C9JIF9	Acylamino-acid-releasing enzyme OS=Homo sapiens GN=APEH PE=1 SV=1	5.974	7.46269	4	4	4	737	81.6	14.51	4
High	P62917	60S ribosomal protein L8 OS=Homo sapiens GN=RPL8 PE=1 SV=2	5.957	12.0623	3	4	3	257	28	13.88	3
High	A0A0S2Z4U0	Ras and Rab interactor 1 (Fragment) OS=Homo sapiens GN=RIN1 PE=2 SV=1	5.937	8.42912	4	4	4	783	84	13.19	4
High	Q8N7G1	Purine nucleoside phosphorylase OS=Homo sapiens PE=2 SV=1	5.919	11.2628	3	3	3	293	32.5	9.39	3
High	A0A024R529	Dihydroxyacetone kinase 2 homolog (Yeast), isoform CRA_a OS=Homo sapiens GN=DAK PE=4 SV=1	5.864	6.26087	3	3	3	575	58.9	10.38	3
High	P26641	Elongation factor 1-gamma OS=Homo sapiens GN=EEF1G PE=1 SV=3	5.807	8.46682	3	3	2	437	50.1	8.62	3
High	A0A140VJJ2	S-formylglutathione hydrolase OS=Homo sapiens GN=ESD PE=2 SV=1	5.802	16.3121	3	3	3	282	31.4	9.41	3
High	B4DUC8	S-methyl-5'-thioadenosine phosphorylase OS=Homo sapiens GN=MTAP PE=1 SV=1	5.776	13.3333	2	2	2	300	33.2	9.63	2
High	P13804	Electron transfer flavoprotein subunit alpha, mitochondrial OS=Homo sapiens GN=ETFA PE=1 SV=1	5.775	13.8138	3	3	3	333	35.1	11.23	3
High	Q549N0	Cofilin 2 (Muscle), isoform CRA_a OS=Homo sapiens GN=CFL2 PE=2 SV=1	5.751	28.9157	3	4	1	166	18.7	14.43	3
High	B2R7Y0	cDNA, FLJ93654, highly similar to Homo sapiens serpin peptidase inhibitor, clade B (ovalbumin), member 2 (SERPINB2), mRNA OS=Homo sapiens PE=2 SV=1	5.718	6.0241	2	3	2	415	46.6	9.63	2
High	B2RDE8	cDNA, FLJ96580, highly similar to Homo sapiens hepatoma-derived growth factor (high-mobility group protein 1-like) (HDGF), mRNA OS=Homo sapiens PE=2 SV=1	5.668	17.0833	3	3	3	240	26.8	9.52	3
High	P06396	Gelsolin OS=Homo sapiens GN=GSN PE=1 SV=1	5.638	4.85934	3	3	3	782	85.6	9.51	3
High	P30040	Endoplasmic reticulum resident protein 29 OS=Homo sapiens GN=ERP29 PE=1 SV=4	5.572	14.1762	3	3	3	261	29	9.54	3
High	P49207	60S ribosomal protein L34 OS=Homo sapiens GN=RPL34 PE=1 SV=3	5.559	22.2222	3	5	3	117	13.3	11.67	3
High	Q6E0U4	Dermokine OS=Homo sapiens GN=DMKN PE=1 SV=3	5.535	6.51261	2	2	2	476	47.1	8.01	2
High	Q53F64	Heterogeneous nuclear ribonucleoprotein AB isoform a variant (Fragment) OS=Homo sapiens PE=2 SV=1	5.532	11.747	3	3	3	332	36	10.24	3
High	O00299	Chloride intracellular channel protein 1 OS=Homo sapiens GN=CLIC1 PE=1 SV=4	5.517	8.29876	2	2	2	241	26.9	6.33	2
High	V9HW63	Epididymis secretory sperm binding protein Li 97n OS=Homo sapiens GN=HEL-S-97n PE=2 SV=1	5.504	11.0701	3	3	2	271	30.5	7.64	3
High	B2R825	Alpha-1,4 glucan phosphorylase OS=Homo sapiens PE=2 SV=1	5.497	4.36836	3	3	3	847	97	9.46	3
High	P85037	Forkhead box protein K1 OS=Homo sapiens GN=FOXK1 PE=1 SV=1	5.487	6.00273	3	3	3	733	75.4	8.82	3
High	P28072	Proteasome subunit beta type-6 OS=Homo sapiens GN=PSMB6 PE=1 SV=4	5.462	12.9707	3	3	3	239	25.3	9.26	3
High	A0A0A6YYJ8	Putative RNA-binding protein Luc7-like 2 OS=Homo sapiens GN=LUC7L2 PE=4 SV=1	5.458	8.29694	3	3	3	458	54.2	10.71	3
High	D6RF35	Vitamin D-binding protein OS=Homo sapiens GN=GC PE=1 SV=1	5.452	9.66387	3	3	3	476	53	8.57	3
High	P84098	60S ribosomal protein L19 OS=Homo sapiens GN=RPL19 PE=1 SV=1	5.39	13.7755	2	2	2	196	23.5	7.15	2
High	Q53HU8	Vimentin variant (Fragment) OS=Homo sapiens PE=2 SV=1	5.326	11.3734	4	4	4	466	53.7	12.86	4
High	B5BUB1	RuvB-like helicase (Fragment) OS=Homo sapiens GN=RUVBL1 PE=2 SV=1	5.322	5.92105	2	2	2	456	50.2	7.08	2
High	Q8NB90	Spermatogenesis-associated protein 5 OS=Homo sapiens GN=SPATA5 PE=1 SV=3	5.305	5.5991	4	4	3	893	97.8	14.51	4
High	P20618	Proteasome subunit beta type-1 OS=Homo sapiens GN=PSMB1 PE=1 SV=2	5.299	19.917	3	3	3	241	26.5	10.8	3
High	P13667	Protein disulfide-isomerase A4 OS=Homo sapiens GN=PDIA4 PE=1 SV=2	5.281	5.11628	2	3	2	645	72.9	6.85	2
High	A8K5N5	cDNA FLJ78142, highly similar to Homo sapiens transglutaminase 1 (K polypeptide epidermal type I, protein-glutamine-gamma-glutamyltransferase), mRNA OS=Homo sapiens PE=2 SV=1	5.255	3.42717	2	2	2	817	89.7	7.95	2
High	P52788	Spermine synthase OS=Homo sapiens GN=SMS PE=1 SV=2	5.228	11.7486	2	2	2	366	41.2	7.15	2
High	A0A024R994	Copine III, isoform CRA_a OS=Homo sapiens GN=CPNE3 PE=4 SV=1	5.194	4.65549	2	2	2	537	60.1	6.52	2
High	P27708	CAD protein OS=Homo sapiens GN=CAD PE=1 SV=3	5.188	1.70787	3	3	3	2225	242.8	9.93	3
High	B4DQK8	cDNA FLJ54750, moderately similar to Pyrroline-5-carboxylate reductase 2 (EC 1.5.1.2) OS=Homo sapiens PE=2 SV=1	5.186	8.35655	2	3	1	359	36.7	12.44	2
High	A0A0K0K1K7	6-phosphogluconolactonase, isoform CRA_b OS=Homo sapiens GN=HEL-S-304 PE=2 SV=1	5.153	12.0155	3	3	3	258	27.5	8.92	3
High	Q2F838	Eukaryotic translation elongation factor 1 gamma (Fragment) OS=Homo sapiens PE=2 SV=1	5.106	29.8851	2	2	1	87	9.6	7.12	2
High	O94929	Actin-binding LIM protein 3 OS=Homo sapiens GN=ABLIM3 PE=1 SV=3	5.098	4.5388	2	2	2	683	77.8	6.81	2
High	A0A087WT20	DDB1- and CUL4-associated factor 13 OS=Homo sapiens GN=DCAF13 PE=1 SV=1	5.039	3.8526	2	3	2	597	67.5	11.09	2
High	P12081	Histidine--tRNA ligase, cytoplasmic OS=Homo sapiens GN=HARS PE=1 SV=2	4.959	5.50098	3	3	3	509	57.4	8.4	3
High	P47929	Galectin-7 OS=Homo sapiens GN=LGALS7 PE=1 SV=2	4.959	18.3824	2	2	2	136	15.1	8.04	2
High	A0A024R866	Ribosomal protein L35, isoform CRA_a OS=Homo sapiens GN=RPL35 PE=3 SV=1	4.941	13.6095	2	2	2	169	17.8	7.8	2
High	A8K7H3	cDNA FLJ77670, highly similar to Homo sapiens ribosomal protein S15a (RPS15A), mRNA OS=Homo sapiens PE=2 SV=1	4.929	13.8462	2	3	2	130	14.8	8.48	2
High	A0A024R904	Calcyclin binding protein, isoform CRA_a OS=Homo sapiens GN=CACYBP PE=4 SV=1	4.91	9.21053	2	2	2	228	26.2	6.13	2
High	A0A087X1N8	Serpin B6 OS=Homo sapiens GN=SERPINB6 PE=1 SV=1	4.874	10.6329	3	3	3	395	44.8	11.32	3
High	P25788	Proteasome subunit alpha type-3 OS=Homo sapiens GN=PSMA3 PE=1 SV=2	4.864	6.27451	2	3	2	255	28.4	7.4	2
High	P53675	Clathrin heavy chain 2 OS=Homo sapiens GN=CLTCL1 PE=1 SV=2	4.852	1.52439	2	2	1	1640	186.9	7.31	2
High	Q59GK9	Ribosomal protein L21 variant (Fragment) OS=Homo sapiens PE=2 SV=1	4.831	15.9509	2	2	2	163	18.9	7.27	2
High	P15121	Aldose reductase OS=Homo sapiens GN=AKR1B1 PE=1 SV=3	4.826	5.6962	2	4	1	316	35.8	10.95	2
High	P16402	Histone H1.3 OS=Homo sapiens GN=HIST1H1D PE=1 SV=2	4.817	9.50226	3	3	3	221	22.3	8.73	3
High	P49915	GMP synthase [glutamine-hydrolyzing] OS=Homo sapiens GN=GMPS PE=1 SV=1	4.81	4.7619	2	2	2	693	76.7	8.04	2
High	Q59ER5	WD repeat-containing protein 1 isoform 1 variant (Fragment) OS=Homo sapiens PE=2 SV=1	4.796	4.80769	2	2	2	624	68.1	7.92	2
High	P21291	Cysteine and glycine-rich protein 1 OS=Homo sapiens GN=CSRP1 PE=1 SV=3	4.78	20.2073	2	2	2	193	20.6	8.51	2
High	P14550	Alcohol dehydrogenase [NADP(+)] OS=Homo sapiens GN=AKR1A1 PE=1 SV=3	4.738	5.53846	2	4	1	325	36.6	11.19	2
High	Q6N091	Putative uncharacterized protein DKFZp686C02220 (Fragment) OS=Homo sapiens GN=DKFZp686C02220 PE=2 SV=1	4.729	5	2	2	1	500	54.1	6.38	2
High	Q9Y266	Nuclear migration protein nudC OS=Homo sapiens GN=NUDC PE=1 SV=1	4.72	9.06344	2	2	2	331	38.2	7.75	2
High	Q13867	Bleomycin hydrolase OS=Homo sapiens GN=BLMH PE=1 SV=1	4.684	9.45055	3	3	3	455	52.5	10.02	3
High	P12429	Annexin A3 OS=Homo sapiens GN=ANXA3 PE=1 SV=3	4.682	4.95356	2	3	2	323	36.4	7.21	2
High	Q92900	Regulator of nonsense transcripts 1 OS=Homo sapiens GN=UPF1 PE=1 SV=2	4.678	1.77148	2	2	2	1129	124.3	7.15	2
High	P43686	26S protease regulatory subunit 6B OS=Homo sapiens GN=PSMC4 PE=1 SV=2	4.625	8.13397	3	3	3	418	47.3	9.33	3
High	Q6UWP8	Suprabasin OS=Homo sapiens GN=SBSN PE=1 SV=2	4.592	12.2034	2	2	2	590	60.5	8.3	2
High	E9KL48	Epididymis tissue sperm binding protein Li 18mP OS=Homo sapiens GN=GLUD1 PE=2 SV=1	4.571	7.16846	2	2	2	558	61.4	7.46	2
High	B4DZR0	cDNA FLJ55529, highly similar to Heat shock 70 kDa protein 4L OS=Homo sapiens PE=2 SV=1	4.552	3.1106	2	2	1	868	97.5	8.33	2
High	F6WQW2	Ran-specific GTPase-activating protein OS=Homo sapiens GN=RANBP1 PE=1 SV=1	4.549	15.8273	2	2	2	278	31.9	5.87	2
High	A0A024R658	Zinc finger protein 36, C3H type-like 1, isoform CRA_a OS=Homo sapiens GN=ZFP36L1 PE=4 SV=1	4.524	15.3846	4	4	3	338	36.3	11.36	4
High	P28070	Proteasome subunit beta type-4 OS=Homo sapiens GN=PSMB4 PE=1 SV=4	4.518	11.3636	2	3	2	264	29.2	9.78	2
High	P61081	NEDD8-conjugating enzyme Ubc12 OS=Homo sapiens GN=UBE2M PE=1 SV=1	4.515	16.3934	3	3	3	183	20.9	8.65	3
High	P49411	Elongation factor Tu, mitochondrial OS=Homo sapiens GN=TUFM PE=1 SV=2	4.502	9.0708	3	3	3	452	49.5	9.7	3
High	M0QYS1	60S ribosomal protein L13a (Fragment) OS=Homo sapiens GN=RPL13A PE=1 SV=2	4.466	9.04762	2	2	2	210	24.2	5.24	2
High	Q86UY5	Protein FAM83A OS=Homo sapiens GN=FAM83A PE=1 SV=1	4.466	3.68664	1	1	1	434	47.4	5	1
High	O43776	Asparagine--tRNA ligase, cytoplasmic OS=Homo sapiens GN=NARS PE=1 SV=1	4.455	6.93431	3	4	3	548	62.9	12.78	3
High	Q9Y508	E3 ubiquitin-protein ligase RNF114 OS=Homo sapiens GN=RNF114 PE=1 SV=1	4.447	9.21053	2	2	2	228	25.7	4.82	2
High	Q5T9B7	Adenylate kinase isoenzyme 1 OS=Homo sapiens GN=AK1 PE=1 SV=1	4.446	11.9048	2	2	2	210	23.4	7.34	2
High	A0A0U4BW16	Non-muscle myosin heavy chain 9 OS=Homo sapiens GN=MYH9 PE=2 SV=1	4.423	1.73204	3	3	3	1963	226.4	9.25	3
High	A0A0C4DG89	Probable ATP-dependent RNA helicase DDX46 OS=Homo sapiens GN=DDX46 PE=1 SV=1	4.423	2.03488	2	3	2	1032	117.4	10.02	2
High	A0A024R1N4	X-ray repair complementing defective repair in Chinese hamster cells 6 (Ku autoantigen, 70kDa), isoform CRA_a OS=Homo sapiens GN=XRCC6 PE=4 SV=1	4.393	4.5977	2	2	2	609	69.8	7.8	2
High	Q14315	Filamin-C OS=Homo sapiens GN=FLNC PE=1 SV=3	4.392	1.10092	2	2	1	2725	290.8	8.5	2
High	P61604	10 kDa heat shock protein, mitochondrial OS=Homo sapiens GN=HSPE1 PE=1 SV=2	4.386	25.4902	2	2	2	102	10.9	7.19	2
High	P60866	40S ribosomal protein S20 OS=Homo sapiens GN=RPS20 PE=1 SV=1	4.365	19.3277	2	2	2	119	13.4	5.94	2
High	P61160	Actin-related protein 2 OS=Homo sapiens GN=ACTR2 PE=1 SV=1	4.355	6.34518	2	2	2	394	44.7	7.26	2
High	P00492	Hypoxanthine-guanine phosphoribosyltransferase OS=Homo sapiens GN=HPRT1 PE=1 SV=2	4.341	15.5963	3	3	3	218	24.6	8.22	3
High	B7Z4C8	60S ribosomal protein L31 OS=Homo sapiens GN=RPL31 PE=1 SV=1	4.331	17.6923	2	2	2	130	15.1	6.65	2
High	A8MUS3	60S ribosomal protein L23a OS=Homo sapiens GN=RPL23A PE=1 SV=1	4.323	12.3711	2	2	2	194	21.9	7.93	2
High	Q5BKZ1	DBIRD complex subunit ZNF326 OS=Homo sapiens GN=ZNF326 PE=1 SV=2	4.312	4.29553	2	2	2	582	65.6	6.71	2
High	Q9BQ69	O-acetyl-ADP-ribose deacetylase MACROD1 OS=Homo sapiens GN=MACROD1 PE=1 SV=2	4.302	7.07692	1	2	1	325	35.5	9.52	1
High	Q96C92	Serologically defined colon cancer antigen 3 OS=Homo sapiens GN=SDCCAG3 PE=1 SV=3	4.293	8.04598	2	2	2	435	47.9	8.59	2
High	B2CIS9	Caspase 14, apoptosis-related cysteine peptidase OS=Homo sapiens GN=CASP14 PE=2 SV=1	4.274	9.91736	2	2	2	242	27.7	6.44	2
High	Q96HB5	Coiled-coil domain-containing protein 120 OS=Homo sapiens GN=CCDC120 PE=1 SV=1	4.235	3.33333	1	1	1	630	67.5	4.5	1
High	P08559	Pyruvate dehydrogenase E1 component subunit alpha, somatic form, mitochondrial OS=Homo sapiens GN=PDHA1 PE=1 SV=3	4.234	5.38462	2	2	2	390	43.3	6.9	2
High	A0A109NGN6	Proteasome subunit alpha type OS=Homo sapiens PE=2 SV=1	4.215	12.8631	2	2	2	241	26.4	7.33	2
High	O00622	Protein CYR61 OS=Homo sapiens GN=CYR61 PE=1 SV=1	4.203	7.08661	2	2	2	381	42	6.38	2
High	Q0VDC6	Peptidylprolyl isomerase OS=Homo sapiens GN=FKBP1A PE=1 SV=1	4.196	9.65517	1	2	1	145	15.7	7.62	1
High	P05109	Protein S100-A8 OS=Homo sapiens GN=S100A8 PE=1 SV=1	4.183	20.4301	2	2	2	93	10.8	4.62	2
High	Q9Y3U8	60S ribosomal protein L36 OS=Homo sapiens GN=RPL36 PE=1 SV=3	4.173	20	2	2	2	105	12.2	6.64	2
High	Q5T1Z8	Pumilio homolog 1 OS=Homo sapiens GN=PUM1 PE=1 SV=1	4.121	1.63399	2	2	2	1224	130	6.35	2
High	D3DQM9	Cytoplasmic polyadenylation element binding protein 4, isoform CRA_b OS=Homo sapiens GN=CPEB4 PE=4 SV=1	4.12	3.10391	2	2	2	741	81.4	5.67	2
High	O00178	GTP-binding protein 1 OS=Homo sapiens GN=GTPBP1 PE=1 SV=3	4.117	4.78326	2	2	2	669	72.4	4.58	2
High	Q86UA3	Chromosome 12 open reading frame 10 OS=Homo sapiens GN=C12orf10 PE=1 SV=1	4.108	5.85106	2	2	2	376	42.5	6.43	2
High	A0A0K0K1L8	Epididymis secretory sperm binding protein Li 129m OS=Homo sapiens GN=HEL-S-129m PE=2 SV=1	4.102	8.43373	2	2	2	249	28.7	5.05	2
High	P41091	Eukaryotic translation initiation factor 2 subunit 3 OS=Homo sapiens GN=EIF2S3 PE=1 SV=3	4.067	5.29661	2	2	2	472	51.1	6.32	2
High	A0A1B0GTU4	Paxillin OS=Homo sapiens GN=PXN PE=1 SV=1	4.054	3.42276	2	3	2	1081	115.8	10.48	2
High	Q8WW22	DnaJ homolog subfamily A member 4 OS=Homo sapiens GN=DNAJA4 PE=1 SV=1	4.051	8.06045	2	2	2	397	44.8	10.01	2
High	D3DQ70	SERPINE1 mRNA binding protein 1, isoform CRA_d OS=Homo sapiens GN=SERBP1 PE=4 SV=1	4.026	5.80645	2	2	2	465	50.9	7.15	2
High	B7Z2P6	cDNA FLJ55296, highly similar to Homo sapiens WD repeat domain 42A (WDR42A), mRNA OS=Homo sapiens PE=2 SV=1	4.026	3.06258	2	2	2	751	84.7	5.96	2
High	B2RDG0	Proteasome subunit alpha type OS=Homo sapiens PE=2 SV=1	4.019	12.6437	3	3	3	261	29.4	7.89	3
High	Q5SW79	Centrosomal protein of 170 kDa OS=Homo sapiens GN=CEP170 PE=1 SV=1	4.014	1.19949	2	2	2	1584	175.2	5.76	2
High	V9HWE0	Annexin OS=Homo sapiens GN=HEL-S-7 PE=2 SV=1	4.012	6.5625	2	2	2	320	35.9	5.85	2
High	P58546	Myotrophin OS=Homo sapiens GN=MTPN PE=1 SV=2	4.004	14.4068	1	1	1	118	12.9	4.99	1
High	P01023	Alpha-2-macroglobulin OS=Homo sapiens GN=A2M PE=1 SV=3	3.971	2.30665	3	3	3	1474	163.2	9	3
High	P09622	Dihydrolipoyl dehydrogenase, mitochondrial OS=Homo sapiens GN=DLD PE=1 SV=2	3.97	4.3222	2	2	2	509	54.1	6.42	2
High	Q6PKG0	La-related protein 1 OS=Homo sapiens GN=LARP1 PE=1 SV=2	3.969	2.0073	2	2	2	1096	123.4	6.21	2
High	P27694	Replication protein A 70 kDa DNA-binding subunit OS=Homo sapiens GN=RPA1 PE=1 SV=2	3.957	4.70779	2	2	2	616	68.1	6.59	2
High	Q12904	Aminoacyl tRNA synthase complex-interacting multifunctional protein 1 OS=Homo sapiens GN=AIMP1 PE=1 SV=2	3.952	17.3077	2	2	2	312	34.3	7.79	2
High	A0A024R880	Cyclin-dependent kinase 9 (CDC2-related kinase), isoform CRA_a OS=Homo sapiens GN=CDK9 PE=3 SV=1	3.95	5.37634	2	2	1	372	42.8	5.33	2
High	Q16610	Extracellular matrix protein 1 OS=Homo sapiens GN=ECM1 PE=1 SV=2	3.946	2.59259	1	1	1	540	60.6	4.51	1
High	P23284	Peptidyl-prolyl cis-trans isomerase B OS=Homo sapiens GN=PPIB PE=1 SV=2	3.945	10.6481	2	2	2	216	23.7	6.17	2
High	B4E1U9	cDNA FLJ54776, highly similar to Cell division control protein 42 homolog OS=Homo sapiens PE=2 SV=1	3.935	8.89831	2	2	2	236	26.5	6	2
High	Q8NBS9	Thioredoxin domain-containing protein 5 OS=Homo sapiens GN=TXNDC5 PE=1 SV=2	3.935	6.01852	2	2	2	432	47.6	6.78	2
High	B3KMQ6	cDNA FLJ12172 fis, clone MAMMA1000684, highly similar to Opioid growth factor receptor OS=Homo sapiens PE=2 SV=1	3.928	4.72674	2	2	2	677	73.3	8.36	2
High	P25311	Zinc-alpha-2-glycoprotein OS=Homo sapiens GN=AZGP1 PE=1 SV=2	3.89	8.38926	2	2	2	298	34.2	5.51	2
High	P32320	Cytidine deaminase OS=Homo sapiens GN=CDA PE=1 SV=2	3.884	11.6438	1	1	1	146	16.2	4.2	1
High	A0A024R814	Ribosomal protein L7, isoform CRA_a OS=Homo sapiens GN=RPL7 PE=4 SV=1	3.859	9.26641	3	3	3	259	30.4	7.47	3
High	P51991	Heterogeneous nuclear ribonucleoprotein A3 OS=Homo sapiens GN=HNRNPA3 PE=1 SV=2	3.827	5.82011	1	1	1	378	39.6	4.21	1
High	I3L0A0	HCG2044781 OS=Homo sapiens GN=TMEM189-UBE2V1 PE=3 SV=1	3.814	2.7027	1	2	1	370	42.2	6.73	1
High	P47989	Xanthine dehydrogenase/oxidase OS=Homo sapiens GN=XDH PE=1 SV=4	3.807	1.72543	2	2	2	1333	146.3	6.59	2
High	Q9BU76	Multiple myeloma tumor-associated protein 2 OS=Homo sapiens GN=MMTAG2 PE=1 SV=1	3.789	9.12548	2	2	2	263	29.4	6.51	2
High	O95881	Thioredoxin domain-containing protein 12 OS=Homo sapiens GN=TXNDC12 PE=1 SV=1	3.766	13.9535	2	2	2	172	19.2	5.48	2
High	A0A024RAM2	Glutaredoxin (Thioltransferase), isoform CRA_c OS=Homo sapiens GN=GLRX PE=4 SV=1	3.709	30.1887	2	2	2	106	11.8	7.31	2
High	Q99456	Keratin, type I cytoskeletal 12 OS=Homo sapiens GN=KRT12 PE=1 SV=1	3.705	3.64372	3	4	1	494	53.5	10.36	3
High	A0A140VK27	Leukotriene A(4) hydrolase OS=Homo sapiens PE=2 SV=1	3.7	4.58265	2	2	2	611	69.2	6.57	2
High	Q59F99	Staufen isoform b variant (Fragment) OS=Homo sapiens PE=2 SV=1	3.674	4.90694	2	2	2	591	64.7	7.91	2
High	Q9BQA1	Methylosome protein 50 OS=Homo sapiens GN=WDR77 PE=1 SV=1	3.669	6.43275	2	2	2	342	36.7	6.5	2
High	Q9UKX2	Myosin-2 OS=Homo sapiens GN=MYH2 PE=1 SV=1	3.645	1.80319	3	3	3	1941	222.9	8.88	3
High	A0A1B2JLU7	Pyrroline-5-carboxylate reductase OS=Homo sapiens GN=PYCR1 PE=3 SV=1	3.626	7.52351	2	2	1	319	33.4	6.92	2
High	B2RD36	cDNA, FLJ96437 OS=Homo sapiens PE=2 SV=1	3.602	10.2041	2	2	2	245	28	6.4	2
High	E5KSX8	Mitochondrial transcription factor A OS=Homo sapiens PE=4 SV=1	3.602	10.9756	2	2	2	246	29.1	6.66	2
High	A0A140VK56	Transaldolase OS=Homo sapiens PE=2 SV=1	3.595	7.12166	2	2	2	337	37.5	5.8	2
High	A0A0S2Z4G4	Tropomyosin 3 isoform 1 (Fragment) OS=Homo sapiens GN=TPM3 PE=2 SV=1	3.57	6.04839	1	2	1	248	29	8.97	1
High	B2RCM2	cDNA, FLJ96156, highly similar to Homo sapiens leucyl-tRNA synthetase (LARS), mRNA OS=Homo sapiens PE=2 SV=1	3.567	2.89116	2	2	2	1176	134.4	8.86	2
High	A0A140VKA6	Testis secretory sperm-binding protein Li 233m OS=Homo sapiens PE=2 SV=1	3.566	3.79404	1	1	1	369	41.3	4.9	1
High	Q8N1G4	Leucine-rich repeat-containing protein 47 OS=Homo sapiens GN=LRRC47 PE=1 SV=1	3.539	5.1458	2	2	2	583	63.4	8.58	2
High	P14324	Farnesyl pyrophosphate synthase OS=Homo sapiens GN=FDPS PE=1 SV=4	3.525	6.68258	2	2	2	419	48.2	6.04	2
High	A4D1W6	Chromosome 7 open reading frame 11 OS=Homo sapiens GN=C7orf11 PE=2 SV=1	3.508	13.9665	1	1	1	179	19.1	4.8	1
High	A0A024R8I8	Chromosome 9 open reading frame 140, isoform CRA_a OS=Homo sapiens GN=C9orf140 PE=4 SV=1	3.5	5.83756	2	2	2	394	42.5	7.24	2
High	Q5HYG7	Putative uncharacterized protein DKFZp686M24262 OS=Homo sapiens GN=DKFZp686M24262 PE=2 SV=1	3.489	2.86344	1	1	1	454	50.3	4.03	1
High	A2A274	Aconitate hydratase, mitochondrial OS=Homo sapiens GN=ACO2 PE=1 SV=1	3.489	2.85714	2	2	2	805	87.8	4.74	2
High	Q9BVQ7	Spermatogenesis-associated protein 5-like protein 1 OS=Homo sapiens GN=SPATA5L1 PE=1 SV=2	3.48	3.58566	2	2	2	753	80.7	7.02	2
High	B3KX14	cDNA FLJ44463 fis, clone UTERU2024969, highly similar to Mortality factor 4-like protein 2 OS=Homo sapiens PE=2 SV=1	3.468	12.1528	2	2	2	288	32.3	6.62	2
High	A0A087X1Z3	Proteasome activator complex subunit 2 OS=Homo sapiens GN=PSME2 PE=1 SV=1	3.467	4.72441	1	2	1	254	29.1	8.73	1
High	C9JC84	Fibrinogen gamma chain OS=Homo sapiens GN=FGG PE=1 SV=1	3.45	3.90456	2	2	2	461	52.3	5.3	2
High	B2R4V2	cDNA, FLJ92227, highly similar to Homo sapiens ribosomal protein L36a-like (RPL36AL), mRNA OS=Homo sapiens PE=2 SV=1	3.445	17.9245	2	2	2	106	12.5	5.78	2
High	A0A024RAC5	Regulator of chromosome condensation 2, isoform CRA_a OS=Homo sapiens GN=RCC2 PE=4 SV=1	3.434	5.74713	2	2	2	522	56	6.66	2
High	Q13131	5'-AMP-activated protein kinase catalytic subunit alpha-1 OS=Homo sapiens GN=PRKAA1 PE=1 SV=4	3.417	4.83005	2	3	2	559	64	8.86	2
High	O00231	26S proteasome non-ATPase regulatory subunit 11 OS=Homo sapiens GN=PSMD11 PE=1 SV=3	3.389	2.8436	1	1	1	422	47.4	3.91	1
High	A0A140VJW2	Stathmin OS=Homo sapiens PE=2 SV=1	3.375	7.47126	1	1	1	174	19.8	4.48	1
High	Q9H000	Probable E3 ubiquitin-protein ligase makorin-2 OS=Homo sapiens GN=MKRN2 PE=1 SV=2	3.358	5.28846	2	2	2	416	46.9	5.59	2
High	P34096	Ribonuclease 4 OS=Homo sapiens GN=RNASE4 PE=1 SV=3	3.325	8.84354	1	2	1	147	16.8	7.52	1
High	Q9NZT1	Calmodulin-like protein 5 OS=Homo sapiens GN=CALML5 PE=1 SV=2	3.324	15.7534	1	1	1	146	15.9	4.42	1
High	A0A024R683	ATPase, H+ transporting, lysosomal 34kDa, V1 subunit D, isoform CRA_a OS=Homo sapiens GN=ATP6V1D PE=4 SV=1	3.318	6.47773	1	1	1	247	28.2	3.98	1
High	A0A024R394	Cysteine and histidine-rich domain (CHORD)-containing 1, isoform CRA_c OS=Homo sapiens GN=CHORDC1 PE=4 SV=1	3.305	9.63855	2	2	2	332	37.5	6.09	2
High	A0A140VJZ1	Ubiquitinyl hydrolase 1 OS=Homo sapiens PE=2 SV=1	3.303	3.61305	2	2	2	858	95.7	7.65	2
High	A4D2P0	Ras-related C3 botulinum toxin substrate 1 (Rho family, small GTP binding protein Rac1) OS=Homo sapiens GN=RAC1 PE=2 SV=1	3.301	14.6919	3	3	3	211	23.5	8.29	3
High	Q9BUS0	ZYX protein (Fragment) OS=Homo sapiens GN=ZYX PE=2 SV=2	3.301	4.30293	1	2	1	581	62.4	8.19	1
High	A0A024R0N7	Sterile alpha motif domain containing 4B, isoform CRA_c OS=Homo sapiens GN=SAMD4B PE=4 SV=1	3.297	2.73775	1	1	1	694	75.4	4.42	1
High	A0A024R0E2	Cold shock domain containing E1, RNA-binding, isoform CRA_a OS=Homo sapiens GN=CSDE1 PE=4 SV=1	3.286	2.75689	2	2	2	798	88.8	6.18	2
High	P99999	Cytochrome c OS=Homo sapiens GN=CYCS PE=1 SV=2	3.253	24.7619	2	2	2	105	11.7	6.5	2
High	Q13642	Four and a half LIM domains protein 1 OS=Homo sapiens GN=FHL1 PE=1 SV=4	3.22	8.04954	2	2	2	323	36.2	5.4	2
High	A0A0A6YYL6	Protein RPL17-C18orf32 OS=Homo sapiens GN=RPL17-C18orf32 PE=3 SV=1	3.218	9.21053	2	2	2	228	26.4	6.91	2
High	P62195	26S protease regulatory subunit 8 OS=Homo sapiens GN=PSMC5 PE=1 SV=1	3.194	5.91133	2	2	1	406	45.6	6.64	2
High	H0Y8X4	2'-deoxynucleoside 5'-phosphate N-hydrolase 1 (Fragment) OS=Homo sapiens GN=DNPH1 PE=1 SV=1	3.186	6.99588	1	1	1	243	25.9	3.82	1
High	B0YIW2	Apolipoprotein C-III OS=Homo sapiens GN=APOC3 PE=1 SV=1	3.183	13.6752	1	1	1	117	12.8	4.54	1
High	Q1KMD3	Heterogeneous nuclear ribonucleoprotein U-like protein 2 OS=Homo sapiens GN=HNRNPUL2 PE=1 SV=1	3.182	1.87416	1	1	1	747	85.1	3.91	1
High	B2R5M8	Isocitrate dehydrogenase [NADP] OS=Homo sapiens PE=2 SV=1	3.178	6.52174	2	2	2	414	46.6	6.52	2
High	P22087	rRNA 2'-O-methyltransferase fibrillarin OS=Homo sapiens GN=FBL PE=1 SV=2	3.158	14.0187	2	2	2	321	33.8	8.1	2
High	Q6IPI1	Ribosomal protein L29 OS=Homo sapiens GN=RPL29 PE=2 SV=1	3.156	14.2857	2	2	2	161	17.9	6.34	2
High	Q6PHR2	Serine/threonine-protein kinase ULK3 OS=Homo sapiens GN=ULK3 PE=1 SV=2	3.153	4.66102	2	2	2	472	53.4	6.41	2
High	Q53EU7	N-myc downstream regulated gene 1 variant (Fragment) OS=Homo sapiens PE=2 SV=1	3.135	6.34518	1	1	1	394	42.8	4.89	1
High	J3KPH8	Histone deacetylase OS=Homo sapiens GN=HDAC7 PE=1 SV=1	3.134	1.77515	1	1	1	1014	108.9	4.88	1
High	A0A140VJW5	Testicular tissue protein Li 192 OS=Homo sapiens PE=2 SV=1	3.123	2.99401	1	1	1	501	57.1	3.43	1
High	Q59EJ5	Glutathione S-transferase (Fragment) OS=Homo sapiens PE=2 SV=1	3.12	8.65801	2	2	2	231	27.2	5.8	2
High	Q15369	Elongin-C OS=Homo sapiens GN=ELOC PE=1 SV=1	3.114	17.8571	1	1	1	112	12.5	4.23	1
High	O60936	Nucleolar protein 3 OS=Homo sapiens GN=NOL3 PE=1 SV=2	3.111	9.13462	1	1	1	208	22.6	3.1	1
High	B3KSH1	Eukaryotic translation initiation factor 3 subunit F OS=Homo sapiens GN=EIF3F PE=2 SV=1	3.104	4.56989	1	1	1	372	39.1	4.65	1
High	P62851	40S ribosomal protein S25 OS=Homo sapiens GN=RPS25 PE=1 SV=1	3.101	15.2	2	2	2	125	13.7	5.45	2
High	P35268	60S ribosomal protein L22 OS=Homo sapiens GN=RPL22 PE=1 SV=2	3.097	10.1562	1	1	1	128	14.8	3.83	1
High	P62277	40S ribosomal protein S13 OS=Homo sapiens GN=RPS13 PE=1 SV=2	3.096	14.5695	2	3	2	151	17.2	8.35	2
High	V9HW55	Proteasome endopeptidase complex OS=Homo sapiens GN=HEL-S-275 PE=2 SV=1	3.095	7.43494	2	2	2	269	30.2	5.93	2
High	Q9Y6E3	HSPC027 OS=Homo sapiens PE=2 SV=1	3.09	6.89655	2	2	2	377	42.6	5.68	2
High	O00391	Sulfhydryl oxidase 1 OS=Homo sapiens GN=QSOX1 PE=1 SV=3	3.026	1.74029	1	1	1	747	82.5	3.69	1
High	A0A024R324	Ras homolog gene family, member A, isoform CRA_a OS=Homo sapiens GN=RHOA PE=4 SV=1	3.02	6.21762	1	2	1	193	21.8	5.94	1
High	E9PR30	40S ribosomal protein S30 OS=Homo sapiens GN=FAU PE=1 SV=1	3.007	10.2041	1	1	1	98	10.9	3.24	1
High	P02749	Beta-2-glycoprotein 1 OS=Homo sapiens GN=APOH PE=1 SV=3	2.996	5.21739	2	2	2	345	38.3	4.81	2
High	Q9UHV9	Prefoldin subunit 2 OS=Homo sapiens GN=PFDN2 PE=1 SV=1	2.99	9.09091	1	1	1	154	16.6	4.9	1
High	F8W031	Uncharacterized protein (Fragment) OS=Homo sapiens PE=1 SV=1	2.97	6.08365	1	1	1	263	29.2	4.91	1
High	Q59FC3	G protein-coupled receptor kinase interactor 1 variant (Fragment) OS=Homo sapiens PE=2 SV=1	2.955	3.10078	2	2	2	774	85.8	7.11	2
High	S4R435	Protein RPS10-NUDT3 (Fragment) OS=Homo sapiens GN=RPS10-NUDT3 PE=4 SV=1	2.944	5.59441	2	2	2	286	32.6	5.44	2
High	Q00796	Sorbitol dehydrogenase OS=Homo sapiens GN=SORD PE=1 SV=4	2.943	4.48179	1	1	1	357	38.3	5.12	1
High	O95218	Zinc finger Ran-binding domain-containing protein 2 OS=Homo sapiens GN=ZRANB2 PE=1 SV=2	2.939	3.63636	1	1	1	330	37.4	3.35	1
High	Q6PGN9	Proline/serine-rich coiled-coil protein 1 OS=Homo sapiens GN=PSRC1 PE=1 SV=1	2.903	3.58127	1	1	1	363	38.8	3.12	1
High	D2IYL2	Corneodesmosin OS=Homo sapiens GN=CDSN PE=4 SV=1	2.896	7.93951	2	2	2	529	51.5	7.67	2
High	Q9NR45	Sialic acid synthase OS=Homo sapiens GN=NANS PE=1 SV=2	2.896	3.89972	1	1	1	359	40.3	3.89	1
High	A6XMV9	Protease serine 2 preproprotein OS=Homo sapiens GN=PRSS2 PE=1 SV=1	2.893	7.66284	1	1	1	261	28	4.1	1
High	F8W727	60S ribosomal protein L32 OS=Homo sapiens GN=RPL32 PE=1 SV=1	2.886	8.49673	1	2	1	153	18	8.46	1
High	A0A0G2JM12	Casein kinase II subunit beta OS=Homo sapiens GN=CSNK2B PE=1 SV=1	2.871	3.61842	1	1	1	304	34.7	2.96	1
High	Q5JSZ5	Protein PRRC2B OS=Homo sapiens GN=PRRC2B PE=1 SV=2	2.854	1.12158	1	1	1	2229	242.8	3.86	1
High	E5RHG6	Tubulin-specific chaperone A OS=Homo sapiens GN=TBCA PE=1 SV=2	2.844	14.5038	2	2	2	131	15.1	5.08	2
High	B5BU01	Eukaryotic translation initiation factor 2 beta OS=Homo sapiens GN=EIF2S2 PE=2 SV=1	2.837	4.8048	2	2	2	333	38.3	5.12	2
High	Q9Y230	RuvB-like 2 OS=Homo sapiens GN=RUVBL2 PE=1 SV=3	2.837	2.15983	1	1	1	463	51.1	3.45	1
High	A0A0C4DG17	40S ribosomal protein SA OS=Homo sapiens GN=RPSA PE=1 SV=1	2.822	4.33333	1	1	1	300	33.3	3.96	1
High	B2R6S5	UMP-CMP kinase OS=Homo sapiens GN=CMPK PE=2 SV=1	2.819	5.70175	1	1	1	228	25.8	3.61	1
High	A8K3C3	T-complex protein 1 subunit delta OS=Homo sapiens PE=2 SV=1	2.814	7.05009	2	2	2	539	57.9	9.75	2
High	Q8TAA3	Proteasome subunit alpha type-7-like OS=Homo sapiens GN=PSMA8 PE=2 SV=3	2.809	5.46875	1	1	1	256	28.5	3.27	1
High	Q96FZ2	Embryonic stem cell-specific 5-hydroxymethylcytosine-binding protein OS=Homo sapiens GN=HMCES PE=1 SV=1	2.791	3.9548	1	1	1	354	40.5	4.33	1
High	P63151	Serine/threonine-protein phosphatase 2A 55 kDa regulatory subunit B alpha isoform OS=Homo sapiens GN=PPP2R2A PE=1 SV=1	2.778	2.46085	1	1	1	447	51.7	3.49	1
High	B5BUC0	Glycogen synthase kinase-3 beta (Fragment) OS=Homo sapiens GN=GSK3B PE=2 SV=1	2.744	7.85714	2	2	2	420	46.7	5.79	2
High	Q59EG8	Proteasome 26S non-ATPase subunit 2 variant (Fragment) OS=Homo sapiens PE=2 SV=1	2.744	1.31435	1	1	1	913	100.5	3.41	1
High	Q96CT7	Coiled-coil domain-containing protein 124 OS=Homo sapiens GN=CCDC124 PE=1 SV=1	2.738	5.8296	1	1	1	223	25.8	3.35	1
High	Q00535	Cyclin-dependent-like kinase 5 OS=Homo sapiens GN=CDK5 PE=1 SV=3	2.731	6.50685	2	2	1	292	33.3	5.32	2
High	P54136	Arginine--tRNA ligase, cytoplasmic OS=Homo sapiens GN=RARS PE=1 SV=2	2.729	2.12121	1	1	1	660	75.3	3.59	1
High	P25815	Protein S100-P OS=Homo sapiens GN=S100P PE=1 SV=2	2.713	13.6842	1	1	1	95	10.4	3.6	1
High	P36507	Dual specificity mitogen-activated protein kinase kinase 2 OS=Homo sapiens GN=MAP2K2 PE=1 SV=1	2.687	3.5	1	1	1	400	44.4	3.72	1
High	Q15464	SH2 domain-containing adapter protein B OS=Homo sapiens GN=SHB PE=1 SV=2	2.685	6.87623	2	2	2	509	55	8.79	2
High	Q9BVN2	RUN and SH3 domain-containing protein 1 OS=Homo sapiens GN=RUSC1 PE=1 SV=3	2.666	1.55211	1	1	1	902	96.4	3.61	1
High	A0A024R0J7	HCG1995540, isoform CRA_a OS=Homo sapiens GN=hCG_1995540 PE=4 SV=1	2.632	4.43548	1	1	1	248	27.5	3.16	1
High	A0A140VJT8	Testicular tissue protein Li 164 OS=Homo sapiens PE=2 SV=1	2.625	2.38612	1	1	1	461	49.9	3.2	1
High	O75822	Eukaryotic translation initiation factor 3 subunit J OS=Homo sapiens GN=EIF3J PE=1 SV=2	2.624	7.75194	1	1	1	258	29	3.98	1
High	A0A024QZK8	Heterogeneous nuclear ribonucleoprotein H3 (2H9), isoform CRA_a OS=Homo sapiens GN=HNRPH3 PE=4 SV=1	2.615	3.46821	1	1	1	346	36.9	3.78	1
High	A8K5A4	cDNA FLJ76826, highly similar to Homo sapiens ceruloplasmin (ferroxidase) (CP), mRNA OS=Homo sapiens PE=2 SV=1	2.603	1.50235	1	1	1	1065	122.1	4.01	1
High	P50897	Palmitoyl-protein thioesterase 1 OS=Homo sapiens GN=PPT1 PE=1 SV=1	2.582	4.24837	1	1	1	306	34.2	3.02	1
High	Q02750	Dual specificity mitogen-activated protein kinase kinase 1 OS=Homo sapiens GN=MAP2K1 PE=1 SV=2	2.581	3.56234	1	2	1	393	43.4	8.05	1
High	Q9NUL7	Probable ATP-dependent RNA helicase DDX28 OS=Homo sapiens GN=DDX28 PE=1 SV=2	2.578	2.03704	1	1	1	540	59.5	3.6	1
High	B4DWA6	cDNA FLJ60094, highly similar to F-actin capping protein subunit beta OS=Homo sapiens PE=2 SV=1	2.576	8.95522	2	2	2	335	37.5	7.07	2
High	J3QRB6	Mitogen-activated protein kinase kinase kinase 3 OS=Homo sapiens GN=MAP3K3 PE=1 SV=1	2.572	4.44104	2	2	2	653	73.6	6.77	2
High	Q59G75	Isoleucyl-tRNA synthetase, cytoplasmic variant (Fragment) OS=Homo sapiens PE=2 SV=1	2.57	1.48554	2	2	2	1279	146.3	5.76	2
High	P62269	40S ribosomal protein S18 OS=Homo sapiens GN=RPS18 PE=1 SV=3	2.562	11.1842	2	2	2	152	17.7	5.29	2
High	O75629	Protein CREG1 OS=Homo sapiens GN=CREG1 PE=1 SV=1	2.54	9.54545	1	2	1	220	24.1	9.56	1
High	P13797	Plastin-3 OS=Homo sapiens GN=PLS3 PE=1 SV=4	2.54	1.90476	1	1	1	630	70.8	2.98	1
High	A8K4N4	cDNA FLJ77844, highly similar to Homo sapiens TNFAIP3 interacting protein 1, mRNA OS=Homo sapiens PE=2 SV=1	2.528	2.20126	1	1	1	636	71.8	3.35	1
High	P55060	Exportin-2 OS=Homo sapiens GN=CSE1L PE=1 SV=3	2.518	1.64779	2	2	2	971	110.3	5.29	2
High	P12004	Proliferating cell nuclear antigen OS=Homo sapiens GN=PCNA PE=1 SV=1	2.507	4.98084	1	1	1	261	28.8	3.6	1
High	V9HW37	Epididymis secretory protein Li 69 OS=Homo sapiens GN=HEL-S-69 PE=1 SV=1	2.506	3.32717	2	2	2	541	59.6	6.32	2
High	O43681	ATPase ASNA1 OS=Homo sapiens GN=ASNA1 PE=1 SV=2	2.501	2.87356	1	1	1	348	38.8	2.83	1
High	K7ERQ8	Uncharacterized protein (Fragment) OS=Homo sapiens PE=4 SV=1	2.5	4.96454	1	1	1	282	31.4	4.91	1
High	Q9NYZ3	G2 and S phase-expressed protein 1 OS=Homo sapiens GN=GTSE1 PE=1 SV=3	2.48	4.72222	2	2	2	720	76.6	7.17	2
High	Q16822	Phosphoenolpyruvate carboxykinase [GTP], mitochondrial OS=Homo sapiens GN=PCK2 PE=1 SV=3	2.477	4.6875	2	2	2	640	70.7	7.63	2
High	H0YGM0	Caseinolytic peptidase B protein homolog (Fragment) OS=Homo sapiens GN=CLPB PE=1 SV=1	2.47	2.38764	1	1	1	712	80.1	3.55	1
High	V9HWA6	Epididymis luminal protein 32 OS=Homo sapiens GN=HEL32 PE=2 SV=1	2.47	6.66667	1	1	1	165	18.5	3.07	1
High	P27635	60S ribosomal protein L10 OS=Homo sapiens GN=RPL10 PE=1 SV=4	2.458	7.94393	2	2	2	214	24.6	5.15	2
High	Q9Y3E8	CGI-150 protein OS=Homo sapiens PE=2 SV=1	2.458	2.57937	1	1	1	504	55	4.18	1
High	Q8WXX5	DnaJ homolog subfamily C member 9 OS=Homo sapiens GN=DNAJC9 PE=1 SV=1	2.448	4.23077	1	1	1	260	29.9	3.87	1
High	B4DLM8	cDNA FLJ56105, highly similar to Nuclear valosin-containing protein-like OS=Homo sapiens PE=2 SV=1	2.429	1.63551	1	1	1	856	95	4.18	1
High	Q5JWF2	Guanine nucleotide-binding protein G(s) subunit alpha isoforms XLas OS=Homo sapiens GN=GNAS PE=1 SV=2	2.408	1.06075	1	1	1	1037	111	2.65	1
High	P62847	40S ribosomal protein S24 OS=Homo sapiens GN=RPS24 PE=1 SV=1	2.406	11.2782	1	1	1	133	15.4	3.59	1
High	P0DME0	Protein SETSIP OS=Homo sapiens GN=SETSIP PE=1 SV=1	2.393	4.63576	1	1	1	302	34.9	2.99	1
High	Q86YV9	Hermansky-Pudlak syndrome 6 protein OS=Homo sapiens GN=HPS6 PE=1 SV=1	2.385	1.67742	1	1	1	775	82.9	4.43	1
High	Q53FD1	Zinc finger, HIT domain containing 2 variant (Fragment) OS=Homo sapiens PE=2 SV=1	2.377	6.20347	2	2	2	403	42.9	6.34	2
High	A0A024R172	Leukotriene B4 12-hydroxydehydrogenase, isoform CRA_a OS=Homo sapiens GN=LTB4DH PE=4 SV=1	2.375	4.25532	1	1	1	329	35.9	4.2	1
High	A0A087WUT6	Eukaryotic translation initiation factor 5B OS=Homo sapiens GN=EIF5B PE=1 SV=1	2.373	0.655738	1	2	1	1220	138.6	5.69	1
High	D3DPK5	SH3 domain binding glutamic acid-rich protein like 3, isoform CRA_a (Fragment) OS=Homo sapiens GN=SH3BGRL3 PE=4 SV=1	2.372	7.393	1	1	1	257	26.8	4.89	1
High	J3KQ32	Obg-like ATPase 1 OS=Homo sapiens GN=OLA1 PE=1 SV=1	2.34	2.64423	1	1	1	416	46.9	3.51	1
High	Q16629	Serine/arginine-rich splicing factor 7 OS=Homo sapiens GN=SRSF7 PE=1 SV=1	2.333	5.88235	1	2	1	238	27.4	7.03	1
High	Q5LJA9	Ubiquitin carboxyl-terminal hydrolase (Fragment) OS=Homo sapiens GN=UCHL5 PE=1 SV=1	2.332	4.34783	2	2	2	368	41.7	4.59	2
High	B4DWX3	Importin subunit alpha OS=Homo sapiens PE=2 SV=1	2.329	3.51201	1	1	1	541	60.5	3.3	1
High	B2RB23	cDNA, FLJ95265, highly similar to Homo sapiens acetyl-Coenzyme A acyltransferase 2 (mitochondrial 3-oxoacyl-Coenzyme A thiolase) (ACAA2), nuclear gene encoding mitochondrial protein, mRNA OS=Homo sapiens PE=2 SV=1	2.329	3.27456	1	1	1	397	42	3.5	1
High	P05387	60S acidic ribosomal protein P2 OS=Homo sapiens GN=RPLP2 PE=1 SV=1	2.323	16.5217	1	1	1	115	11.7	5.18	1
High	A8K5K0	cDNA FLJ78309, highly similar to Homo sapiens heterogeneous nuclear ribonucleoprotein U-like 1 (HNRPUL1), transcript variant 1, mRNA OS=Homo sapiens PE=2 SV=1	2.322	1.75234	1	1	1	856	95.6	3.81	1
High	B2RDQ3	cDNA, FLJ96718, highly similar to Homo sapiens splicing factor, arginine/serine-rich 10 (transformer 2 homolog, Drosophila) (SFRS10), mRNA OS=Homo sapiens PE=2 SV=1	2.317	5.55556	1	1	1	288	33.7	4.1	1
High	Q00688	Peptidyl-prolyl cis-trans isomerase FKBP3 OS=Homo sapiens GN=FKBP3 PE=1 SV=1	2.314	6.69643	1	1	1	224	25.2	3.5	1
High	Q53RG0	Eukaryotic translation initiation factor 4E member 2, isoform CRA_c OS=Homo sapiens GN=tmp_locus_9 PE=2 SV=1	2.313	5.30612	1	1	1	245	28.3	4.38	1
High	P00734	Prothrombin OS=Homo sapiens GN=F2 PE=1 SV=2	2.308	2.09003	1	1	1	622	70	3.27	1
High	Q9Y3B4	Splicing factor 3B subunit 6 OS=Homo sapiens GN=SF3B6 PE=1 SV=1	2.288	11.2	1	1	1	125	14.6	3.56	1
High	Q2NKY6	Uncharacterized protein OS=Homo sapiens PE=2 SV=1	2.282	5.72917	1	1	1	192	21.7	3.29	1
High	P62875	DNA-directed RNA polymerases I, II, and III subunit RPABC5 OS=Homo sapiens GN=POLR2L PE=1 SV=1	2.267	13.4328	1	1	1	67	7.6	3.19	1
High	Q14473	Uncharacterized protein OS=Homo sapiens PE=3 SV=1	2.264	5.71429	1	1	1	175	18.9	3.23	1
High	P49773	Histidine triad nucleotide-binding protein 1 OS=Homo sapiens GN=HINT1 PE=1 SV=2	2.249	16.6667	2	2	2	126	13.8	6.21	2
High	P30043	Flavin reductase (NADPH) OS=Homo sapiens GN=BLVRB PE=1 SV=3	2.233	7.28155	1	1	1	206	22.1	5.28	1
High	P49458	Signal recognition particle 9 kDa protein OS=Homo sapiens GN=SRP9 PE=1 SV=2	2.232	12.7907	1	1	1	86	10.1	3.73	1
High	P31025	Lipocalin-1 OS=Homo sapiens GN=LCN1 PE=1 SV=1	2.215	6.25	1	1	1	176	19.2	3.14	1
High	P21399	Cytoplasmic aconitate hydratase OS=Homo sapiens GN=ACO1 PE=1 SV=3	2.206	1.79978	2	2	2	889	98.3	4.38	2
High	Q9ULI2	Beta-citrylglutamate synthase B OS=Homo sapiens GN=RIMKLB PE=2 SV=2	2.2	4.14508	1	1	1	386	42.4	5.14	1
High	B4E1Z4	cDNA FLJ55673, highly similar to Complement factor B (EC 3.4.21.47) OS=Homo sapiens PE=1 SV=1	2.198	1.10585	1	1	1	1266	140.9	3.46	1
High	P08243	Asparagine synthetase [glutamine-hydrolyzing] OS=Homo sapiens GN=ASNS PE=1 SV=4	2.191	3.56506	2	2	2	561	64.3	6.62	2
High	P23381	Tryptophan--tRNA ligase, cytoplasmic OS=Homo sapiens GN=WARS PE=1 SV=2	2.19	2.76008	1	1	1	471	53.1	3.92	1
High	P18077	60S ribosomal protein L35a OS=Homo sapiens GN=RPL35A PE=1 SV=2	2.189	6.36364	1	2	1	110	12.5	4.34	1
High	Q6FIE5	PHP14 protein OS=Homo sapiens GN=PHP14 PE=2 SV=1	2.171	16.8	1	1	1	125	13.8	3.63	1
High	A0A024R5C5	Pyruvate carboxylase OS=Homo sapiens GN=PC PE=4 SV=1	2.163	1.01868	1	1	1	1178	129.6	3.23	1
High	H0YKD8	60S ribosomal protein L28 OS=Homo sapiens GN=RPL28 PE=1 SV=1	2.163	11.1765	2	2	2	170	19.1	5.64	2
High	O00165	HCLS1-associated protein X-1 OS=Homo sapiens GN=HAX1 PE=1 SV=2	2.162	3.94265	1	1	1	279	31.6	3.61	1
High	B4DUP2	cDNA FLJ56155, highly similar to UTP--glucose-1-phosphate uridylyltransferase 2 (EC 2.7.7.9) OS=Homo sapiens PE=2 SV=1	2.145	2.32108	1	1	1	517	57.8	3.65	1
High	Q16630	Cleavage and polyadenylation specificity factor subunit 6 OS=Homo sapiens GN=CPSF6 PE=1 SV=2	2.116	1.99637	1	1	1	551	59.2	3.65	1
High	Q7L4Q3	Glutathione peroxidase OS=Homo sapiens GN=GPX1 PE=2 SV=1	2.075	9.35961	1	1	1	203	22.1	3.94	1
High	Q02241	Kinesin-like protein KIF23 OS=Homo sapiens GN=KIF23 PE=1 SV=3	2.07	1.45833	1	1	1	960	110	3.5	1
High	B4E2S3	cDNA FLJ56561 OS=Homo sapiens PE=2 SV=1	2.069	1.89394	1	1	1	792	86.7	4.17	1
High	B7ZC38	Endophilin-B2 OS=Homo sapiens GN=SH3GLB2 PE=1 SV=1	2.064	3.25	1	1	1	400	44.3	4.57	1
High	P62081	40S ribosomal protein S7 OS=Homo sapiens GN=RPS7 PE=1 SV=1	2.052	4.12371	1	1	1	194	22.1	2.67	1
High	A0A024RAI1	ARP3 actin-related protein 3 homolog (Yeast), isoform CRA_a OS=Homo sapiens GN=ACTR3 PE=3 SV=1	2.051	3.34928	1	1	1	418	47.3	3.31	1
High	D9ZGG2	Vitronectin OS=Homo sapiens GN=VTN PE=4 SV=1	2.044	2.09205	1	1	1	478	54.3	2.41	1
High	Q8ND25	E3 ubiquitin-protein ligase ZNRF1 OS=Homo sapiens GN=ZNRF1 PE=1 SV=2	2.039	6.1674	1	1	1	227	23.8	2.62	1
High	Q13627	Dual specificity tyrosine-phosphorylation-regulated kinase 1A OS=Homo sapiens GN=DYRK1A PE=1 SV=2	2.035	1.17955	1	1	1	763	85.5	2.96	1
High	P61254	60S ribosomal protein L26 OS=Homo sapiens GN=RPL26 PE=1 SV=1	2.027	10.3448	2	2	2	145	17.2	4.03	2
High	Q6ZVX7	F-box only protein 50 OS=Homo sapiens GN=NCCRP1 PE=1 SV=1	2.024	4	1	1	1	275	30.8	2.72	1
High	Q6IPX4	40S ribosomal protein S16 OS=Homo sapiens GN=RPS16 PE=1 SV=1	1.995	6.57895	1	1	1	152	17.1	3.12	1
High	O95373	Importin-7 OS=Homo sapiens GN=IPO7 PE=1 SV=1	1.992	1.15607	1	1	1	1038	119.4	4.22	1
High	Q04206	Transcription factor p65 OS=Homo sapiens GN=RELA PE=1 SV=2	1.992	2.54083	1	1	1	551	60.2	3.14	1
High	O14641	Segment polarity protein dishevelled homolog DVL-2 OS=Homo sapiens GN=DVL2 PE=1 SV=1	1.987	1.63043	1	1	1	736	78.9	3.58	1
High	Q9BX40	Protein LSM14 homolog B OS=Homo sapiens GN=LSM14B PE=1 SV=1	1.976	4.15584	1	1	1	385	42	3.72	1
High	O96019	Actin-like protein 6A OS=Homo sapiens GN=ACTL6A PE=1 SV=1	1.972	3.2634	1	1	1	429	47.4	4.34	1
High	A0A0S2Z3W7	Nucleotide diphosphatase (Fragment) OS=Homo sapiens GN=ITPA PE=2 SV=1	1.968	10.3093	1	1	1	194	21.4	4.01	1
High	B5ME19	Eukaryotic translation initiation factor 3 subunit C-like protein OS=Homo sapiens GN=EIF3CL PE=3 SV=1	1.963	1.09409	1	1	1	914	105.4	3.04	1
High	A0A1B4Z394	Tubulin gamma chain OS=Homo sapiens GN=TUBG2 PE=2 SV=1	1.954	3.26087	1	1	1	460	52.1	2.33	1
High	D3DRR6	Inter-alpha (Globulin) inhibitor H2, isoform CRA_a OS=Homo sapiens GN=ITIH2 PE=4 SV=1	1.947	1.58395	1	1	1	947	106.5	3.65	1
High	B3KTV8	cDNA FLJ38830 fis, clone MESAN1000080, highly similar to ERBB receptor feedback inhibitor 1 OS=Homo sapiens PE=2 SV=1	1.935	3.0303	1	1	1	462	50.5	3.91	1
High	B2R665	cDNA, FLJ92810, highly similar to Homo sapiens protein phosphatase 1G (formerly 2C), magnesium-dependent, gamma isoform (PPM1G), mRNA OS=Homo sapiens PE=2 SV=1	1.926	2.01465	1	1	1	546	59.2	3.85	1
High	A0A024RDL9	Phosphoserine phosphatase, isoform CRA_b OS=Homo sapiens GN=PSPH PE=4 SV=1	1.912	5.55556	1	1	1	252	28.1	3.14	1
High	A0A161I202	Lactoferrin OS=Homo sapiens GN=LTF PE=2 SV=1	1.912	1.26582	1	1	1	711	78.3	2.17	1
High	D3DUP1	WNK lysine deficient protein kinase 1, isoform CRA_b OS=Homo sapiens GN=WNK1 PE=4 SV=1	1.908	0.419815	1	1	1	2382	250.6	2.89	1
High	A0A1B0GW03	Pleckstrin homology domain-containing family A member 6 (Fragment) OS=Homo sapiens GN=PLEKHA6 PE=4 SV=1	1.904	16.4835	1	1	1	91	10.2	4.31	1
High	B0YIW6	Archain 1, isoform CRA_a OS=Homo sapiens GN=ARCN1 PE=1 SV=1	1.898	1.81159	1	1	1	552	61.6	2.99	1
High	Q9NZB2	Constitutive coactivator of PPAR-gamma-like protein 1 OS=Homo sapiens GN=FAM120A PE=1 SV=2	1.889	1.61002	1	1	1	1118	121.8	2.42	1
High	A0A0A6YY92	Adenylosuccinate lyase OS=Homo sapiens GN=ADSL PE=1 SV=1	1.888	2.20884	1	1	1	498	56.2	3.3	1
High	Q13045	Protein flightless-1 homolog OS=Homo sapiens GN=FLII PE=1 SV=2	1.881	0.788022	1	1	1	1269	144.7	3.02	1
High	P20930	Filaggrin OS=Homo sapiens GN=FLG PE=1 SV=3	1.859	0.22162	1	1	1	4061	434.9	3.17	1
High	A0A0A6YYL2	Sulfotransferase OS=Homo sapiens GN=SULT1A4 PE=1 SV=1	1.84	3.32226	1	1	1	301	34.8	3.02	1
High	P50570	Dynamin-2 OS=Homo sapiens GN=DNM2 PE=1 SV=2	1.827	1.14943	1	1	1	870	98	2.69	1
High	A0A0A0MQX8	Muscleblind-like protein 1 OS=Homo sapiens GN=MBNL1 PE=1 SV=1	1.823	2.25	1	1	1	400	43	2.4	1
High	Q08431	Lactadherin OS=Homo sapiens GN=MFGE8 PE=1 SV=2	1.82	3.35917	1	1	1	387	43.1	3.75	1
High	O95817	BAG family molecular chaperone regulator 3 OS=Homo sapiens GN=BAG3 PE=1 SV=3	1.819	2.78261	1	1	1	575	61.6	3.65	1
High	Q86Y79	Probable peptidyl-tRNA hydrolase OS=Homo sapiens GN=PTRH1 PE=1 SV=1	1.81	11.6822	1	1	1	214	22.9	3.61	1
High	P46781	40S ribosomal protein S9 OS=Homo sapiens GN=RPS9 PE=1 SV=3	1.801	4.12371	1	2	1	194	22.6	5.19	1
High	P12273	Prolactin-inducible protein OS=Homo sapiens GN=PIP PE=1 SV=1	1.79	5.47945	1	1	1	146	16.6	2.37	1
High	Q9UI42	Carboxypeptidase A4 OS=Homo sapiens GN=CPA4 PE=1 SV=2	1.781	2.3753	1	1	1	421	47.3	3.39	1
High	Q14498	RNA-binding protein 39 OS=Homo sapiens GN=RBM39 PE=1 SV=2	1.768	1.88679	1	1	1	530	59.3	2.87	1
High	P61970	Nuclear transport factor 2 OS=Homo sapiens GN=NUTF2 PE=1 SV=1	1.768	11.0236	1	1	1	127	14.5	4.65	1
High	P06703	Protein S100-A6 OS=Homo sapiens GN=S100A6 PE=1 SV=1	1.764	8.88889	1	1	1	90	10.2	2.65	1
High	P36957	Dihydrolipoyllysine-residue succinyltransferase component of 2-oxoglutarate dehydrogenase complex, mitochondrial OS=Homo sapiens GN=DLST PE=1 SV=4	1.759	1.98675	1	1	1	453	48.7	2.71	1
High	Q01469	Fatty acid-binding protein, epidermal OS=Homo sapiens GN=FABP5 PE=1 SV=3	1.757	14.8148	1	1	1	135	15.2	3.29	1
High	P10909	Clusterin OS=Homo sapiens GN=CLU PE=1 SV=1	1.756	3.56347	1	1	1	449	52.5	3.39	1
High	Q8ND56	Protein LSM14 homolog A OS=Homo sapiens GN=LSM14A PE=1 SV=3	1.749	2.15983	1	1	1	463	50.5	2.54	1
High	P62854	40S ribosomal protein S26 OS=Homo sapiens GN=RPS26 PE=1 SV=3	1.741	7.82609	1	1	1	115	13	2.51	1
High	P23443	Ribosomal protein S6 kinase beta-1 OS=Homo sapiens GN=RPS6KB1 PE=1 SV=2	1.74	1.52381	1	1	1	525	59.1	2.59	1
High	P14174	Macrophage migration inhibitory factor OS=Homo sapiens GN=MIF PE=1 SV=4	1.73	7.82609	1	1	1	115	12.5	2.6	1
High	O75223	Gamma-glutamylcyclotransferase OS=Homo sapiens GN=GGCT PE=1 SV=1	1.723	9.04255	1	1	1	188	21	2.5	1
High	Q9BWG6	Sodium channel modifier 1 OS=Homo sapiens GN=SCNM1 PE=1 SV=1	1.719	3.91304	1	1	1	230	25.9	2.71	1
High	P02545	Prelamin-A/C OS=Homo sapiens GN=LMNA PE=1 SV=1	1.697	2.40964	1	1	1	664	74.1	4.02	1
High	Q9BXP5	Serrate RNA effector molecule homolog OS=Homo sapiens GN=SRRT PE=1 SV=1	1.696	1.14155	1	1	1	876	100.6	2.93	1
High	A0A024RAL9	Chromosome 5 open reading frame 21, isoform CRA_b OS=Homo sapiens GN=C5orf21 PE=4 SV=1	1.693	2.40385	1	1	1	416	47.9	2.99	1
High	B2R7B5	cDNA, FLJ93365, highly similar to Homo sapiens KH domain containing, RNA binding, signal transduction associated 1 (KHDRBS1), mRNA OS=Homo sapiens PE=2 SV=1	1.688	3.16027	1	1	1	443	48.2	3.74	1
High	Q13887	Krueppel-like factor 5 OS=Homo sapiens GN=KLF5 PE=1 SV=2	1.683	5.03282	1	1	1	457	50.8	5.28	1
High	K7EJ20	Glutathione peroxidase OS=Homo sapiens GN=GPX4 PE=1 SV=3	1.682	4.54545	1	1	1	242	26.8	3.42	1
High	O43488	Aflatoxin B1 aldehyde reductase member 2 OS=Homo sapiens GN=AKR7A2 PE=1 SV=3	1.674	4.17827	1	1	1	359	39.6	3.76	1
High	A0A024QZY1	JTV1 gene, isoform CRA_a OS=Homo sapiens GN=JTV1 PE=4 SV=1	1.672	7.8125	1	1	1	320	35.3	3.59	1
High	A0A140VK70	Testis secretory sperm-binding protein Li 197a OS=Homo sapiens PE=2 SV=1	1.671	2.77136	1	1	1	433	48.6	3.23	1
High	O14737	Programmed cell death protein 5 OS=Homo sapiens GN=PDCD5 PE=1 SV=3	1.667	8.8	1	1	1	125	14.3	2.95	1
High	P07741	Adenine phosphoribosyltransferase OS=Homo sapiens GN=APRT PE=1 SV=2	1.664	5.55556	1	1	1	180	19.6	2.19	1
High	A0A024RA52	Proteasome subunit alpha type OS=Homo sapiens GN=PSMA2 PE=1 SV=1	1.656	8.97436	1	1	1	234	25.9	3.64	1
High	B4E0L0	cDNA FLJ54030, highly similar to Polymerase delta-interacting protein 3 OS=Homo sapiens PE=2 SV=1	1.65	3.88128	1	1	1	438	48.1	3.18	1
High	P35270	Sepiapterin reductase OS=Homo sapiens GN=SPR PE=1 SV=1	1.645	5.74713	1	1	1	261	28	4.4	1
High	B7ZMD7	Alpha-amylase OS=Homo sapiens GN=AMY1A PE=2 SV=1	1.63	3.13112	1	1	1	511	57.7	3.43	1
High	A0A024R1S8	LIM and SH3 protein 1, isoform CRA_b OS=Homo sapiens GN=LASP1 PE=4 SV=1	1.62	4.98084	1	1	1	261	29.7	3.72	1
High	P31153	S-adenosylmethionine synthase isoform type-2 OS=Homo sapiens GN=MAT2A PE=1 SV=1	1.615	2.27848	1	1	1	395	43.6	2.81	1
High	Q6FHY3	LOR protein OS=Homo sapiens GN=LOR PE=2 SV=1	1.612	2.53165	1	1	1	316	26	2.87	1
High	B2R983	cDNA, FLJ94267, highly similar to Homo sapiens glutathione S-transferase omega 1 (GSTO1), mRNA OS=Homo sapiens PE=2 SV=1	1.602	3.3195	1	1	1	241	27.5	2.06	1
High	Q8IVT2	Mitotic interactor and substrate of PLK1 OS=Homo sapiens GN=MISP PE=1 SV=1	1.599	2.35641	1	1	1	679	75.3	4.39	1
High	A8K6N3	cDNA FLJ76886, highly similar to Homo sapiens loss of heterozygosity, 11, chromosomal region 2, gene A (LOH11CR2A), transcript variant 1, mRNA OS=Homo sapiens PE=2 SV=1	1.593	1.27226	1	1	1	786	86.5	2.62	1
High	P38117	Electron transfer flavoprotein subunit beta OS=Homo sapiens GN=ETFB PE=1 SV=3	1.588	4.70588	1	1	1	255	27.8	3.62	1
High	Q6NS36	Ferritin (Fragment) OS=Homo sapiens GN=FTH1 PE=2 SV=1	1.586	4.74138	1	1	1	232	26.2	0	1
High	B0QYS7	Transcription factor EB OS=Homo sapiens GN=TFEB PE=1 SV=1	1.582	1.77936	1	1	1	562	62	2.72	1
High	Q53FN7	BZW1 protein variant (Fragment) OS=Homo sapiens PE=2 SV=1	1.566	2.12264	1	1	1	424	48.6	2.67	1
High	A5JGZ4	Peptidylprolyl isomerase (Fragment) OS=Homo sapiens GN=AIP PE=4 SV=1	1.557	2.98913	1	1	1	368	40.7	3.49	1
High	B5BUB5	Autoantigen La (Fragment) OS=Homo sapiens GN=SSB PE=2 SV=1	1.557	1.71569	1	1	1	408	46.8	2.11	1
High	Q96EI5	Transcription elongation factor A protein-like 4 OS=Homo sapiens GN=TCEAL4 PE=1 SV=2	1.551	5.11628	1	1	1	215	24.6	3.8	1
High	A0A087WY85	Ubiquitin-conjugating enzyme E2 D3 OS=Homo sapiens GN=UBE2D3 PE=1 SV=1	1.537	7.43243	1	1	1	148	16.8	2.63	1
High	A0A0B4J1S4	Protein SELENOF OS=Homo sapiens GN=SELENOF PE=1 SV=1	1.532	5.45455	1	1	1	165	18	2.49	1
High	A0A087X020	Ribosome maturation protein SBDS OS=Homo sapiens GN=SBDS PE=1 SV=1	1.53	3.6	1	1	1	250	28.8	2.17	1
High	A0A0F7G8J1	Plasminogen OS=Homo sapiens GN=PLG PE=2 SV=1	1.527	0.988875	1	1	1	809	90.6	2.21	1
High	Q12955	Ankyrin-3 OS=Homo sapiens GN=ANK3 PE=1 SV=3	1.524	0.182774	1	1	1	4377	480.1	2.42	1
High	Q14186	Transcription factor Dp-1 OS=Homo sapiens GN=TFDP1 PE=1 SV=1	1.523	2.92683	1	1	1	410	45	2.72	1
High	A0A024R7X7	Staufen, RNA binding protein, homolog 2 (Drosophila), isoform CRA_b OS=Homo sapiens GN=STAU2 PE=4 SV=1	1.517	2.45614	1	1	1	570	62.6	3.49	1
High	B5BUD2	Replication factor C 2 isoform 1 (Fragment) OS=Homo sapiens GN=RFC2 PE=2 SV=1	1.503	2.25989	1	1	1	354	39.2	2.34	1
High	E9PB61	THO complex subunit 4 OS=Homo sapiens GN=ALYREF PE=1 SV=1	1.502	4.16667	1	1	1	264	27.5	2.75	1
High	Q59EK3	Adaptor-related protein complex 1, mu 1 subunit variant (Fragment) OS=Homo sapiens PE=2 SV=1	1.499	2.36052	1	1	1	466	53.2	2.58	1
High	Q8NG66	Serine/threonine-protein kinase Nek11 OS=Homo sapiens GN=NEK11 PE=1 SV=2	1.499	1.55039	1	1	1	645	74.1	3.17	1
High	A0A024R6F4	Numb homolog (Drosophila), isoform CRA_d OS=Homo sapiens GN=NUMB PE=4 SV=1	1.492	2.30415	1	1	1	651	70.8	3.37	1
High	P11177	Pyruvate dehydrogenase E1 component subunit beta, mitochondrial OS=Homo sapiens GN=PDHB PE=1 SV=3	1.484	3.06407	1	1	1	359	39.2	3.3	1
High	O75398	Deformed epidermal autoregulatory factor 1 homolog OS=Homo sapiens GN=DEAF1 PE=1 SV=1	1.482	2.83186	1	1	1	565	59.3	3.01	1
High	Q6ZRR7	Leucine-rich repeat-containing protein 9 OS=Homo sapiens GN=LRRC9 PE=2 SV=2	1.477	0.619408	1	1	1	1453	166.8	2.91	1
High	V9HWJ1	Glutathione synthetase OS=Homo sapiens GN=HEL-S-64p PE=2 SV=1	1.47	2.74262	1	1	1	474	52.4	4.59	1
High	O60232	Sjoegren syndrome/scleroderma autoantigen 1 OS=Homo sapiens GN=SSSCA1 PE=1 SV=1	1.468	4.0201	1	1	1	199	21.5	1.92	1
High	Q9UBU8	Mortality factor 4-like protein 1 OS=Homo sapiens GN=MORF4L1 PE=1 SV=2	1.453	2.20994	1	1	1	362	41.4	2.14	1
High	Q13283	Ras GTPase-activating protein-binding protein 1 OS=Homo sapiens GN=G3BP1 PE=1 SV=1	1.449	2.14592	1	1	1	466	52.1	2.93	1
High	Q5U5Q3	RNA-binding E3 ubiquitin-protein ligase MEX3C OS=Homo sapiens GN=MEX3C PE=1 SV=3	1.447	3.0349	1	1	1	659	69.3	3.95	1
High	B5MBX0	Sororin OS=Homo sapiens GN=CDCA5 PE=1 SV=1	1.446	4.88599	1	1	1	307	33.7	3.53	1
High	A0A0S2Z4R1	Tyrosine--tRNA ligase (Fragment) OS=Homo sapiens GN=YARS PE=2 SV=1	1.433	1.70455	1	1	1	528	59.1	1.71	1
High	A0A024RDE8	PDZ and LIM domain 5, isoform CRA_c OS=Homo sapiens GN=PDLIM5 PE=4 SV=1	1.431	1.51007	1	1	1	596	63.9	2.41	1
High	B7ZLF8	Uncharacterized protein OS=Homo sapiens PE=2 SV=1	1.421	8.98876	1	1	1	89	9.9	2.51	1
High	J3QRS3	Myosin regulatory light chain 12A OS=Homo sapiens GN=MYL12A PE=1 SV=1	1.418	5.64972	1	1	1	177	20.4	3.08	1
High	P49720	Proteasome subunit beta type-3 OS=Homo sapiens GN=PSMB3 PE=1 SV=2	1.399	6.82927	1	1	1	205	22.9	3.51	1
High	L8B936	MHC class I antigen (Fragment) OS=Homo sapiens GN=HLA-A PE=3 SV=1	1.399	2.21607	1	1	1	361	40.6	2.07	1
High	O15143	Actin-related protein 2/3 complex subunit 1B OS=Homo sapiens GN=ARPC1B PE=1 SV=3	1.393	2.15054	1	1	1	372	40.9	2.59	1
High	A0A0A0MTS7	Titin OS=Homo sapiens GN=TTN PE=1 SV=1	1.385	0.0555694	1	1	1	35991	3992.2	3.93	1
High	D3DQU2	Tripeptidyl peptidase I, isoform CRA_a OS=Homo sapiens GN=TPP1 PE=4 SV=1	1.363	2.44755	1	1	1	572	62.2	3.75	1
High	V9HW44	Epididymis secretory protein Li 303 OS=Homo sapiens GN=HEL-S-303 PE=2 SV=1	1.361	3.93013	1	1	1	229	25.6	2.93	1
High	Q3KQU3	MAP7 domain-containing protein 1 OS=Homo sapiens GN=MAP7D1 PE=1 SV=1	1.358	1.42687	1	1	1	841	92.8	3.9	1
High	F8VV71	Ubiquitin-conjugating enzyme E2 N OS=Homo sapiens GN=UBE2N PE=1 SV=1	1.354	4.60526	1	1	1	152	17.7	2.12	1
High	P46087	Probable 28S rRNA (cytosine(4447)-C(5))-methyltransferase OS=Homo sapiens GN=NOP2 PE=1 SV=2	1.354	1.10837	1	1	1	812	89.2	2.55	1
High	A0A1B0GUU9	Ig mu chain C region (Fragment) OS=Homo sapiens GN=IGHM PE=1 SV=1	1.353	1.68776	1	1	1	474	51.9	2.74	1
High	O95433	Activator of 90 kDa heat shock protein ATPase homolog 1 OS=Homo sapiens GN=AHSA1 PE=1 SV=1	1.349	2.36686	1	1	1	338	38.3	2.7	1
High	P51398	28S ribosomal protein S29, mitochondrial OS=Homo sapiens GN=DAP3 PE=1 SV=1	1.342	3.51759	1	1	1	398	45.5	3.95	1
High	Q9BRL6	Serine/arginine-rich splicing factor 8 OS=Homo sapiens GN=SRSF8 PE=1 SV=1	1.342	2.83688	1	1	1	282	32.3	2.23	1
High	A0A0G2JPT5	Cell cycle checkpoint protein RAD17 OS=Homo sapiens GN=RAD17 PE=1 SV=1	1.336	1.90896	1	1	1	681	77	4.59	1
High	Q9HCC0	Methylcrotonoyl-CoA carboxylase beta chain, mitochondrial OS=Homo sapiens GN=MCCC2 PE=1 SV=1	1.335	2.30906	1	1	1	563	61.3	4.52	1
High	A0A1K0GXZ1	Globin C1 OS=Homo sapiens GN=GLNC1 PE=4 SV=1	1.33	5.08475	1	1	1	177	19.2	2.79	1
High	A0A0A0MQS1	Pyrroline-5-carboxylate reductase OS=Homo sapiens GN=PYCRL PE=1 SV=1	1.326	3.84615	1	1	1	286	29.9	3.22	1
High	Q8NB16	Mixed lineage kinase domain-like protein OS=Homo sapiens GN=MLKL PE=1 SV=1	1.322	2.54777	1	1	1	471	54.4	2.97	1
High	Q15691	Microtubule-associated protein RP/EB family member 1 OS=Homo sapiens GN=MAPRE1 PE=1 SV=3	1.308	7.46269	1	1	1	268	30	3.63	1
High	P23368	NAD-dependent malic enzyme, mitochondrial OS=Homo sapiens GN=ME2 PE=1 SV=1	1.281	2.05479	1	1	1	584	65.4	3.66	1
High	B4DMN1	cDNA FLJ61136, highly similar to Ras-related protein Rab-11A OS=Homo sapiens PE=2 SV=1	1.272	4.98084	1	1	1	261	28.8	4.08	1
High	Q8NBP7	Proprotein convertase subtilisin/kexin type 9 OS=Homo sapiens GN=PCSK9 PE=1 SV=3	1.272	2.16763	1	1	1	692	74.2	3.21	1
High	A8K3A8	cDNA FLJ75085, highly similar to Homo sapiens glutaminyl-tRNA synthetase (QARS), mRNA OS=Homo sapiens PE=2 SV=1	1.264	1.54839	1	1	1	775	87.8	3.37	1
High	B0YJ28	Interleukin-18 OS=Homo sapiens GN=IL18 PE=3 SV=1	1.255	4.14508	1	1	1	193	22.3	2.31	1
High	Q96DA0	Zymogen granule protein 16 homolog B OS=Homo sapiens GN=ZG16B PE=1 SV=3	1.251	4.32692	1	1	1	208	22.7	2.54	1
High	Q09472	Histone acetyltransferase p300 OS=Homo sapiens GN=EP300 PE=1 SV=2	1.25	0.289975	1	1	1	2414	264	1.94	1
High	Q8WVX7	Ribosomal protein S19 (Fragment) OS=Homo sapiens PE=2 SV=1	1.249	6.36943	1	1	1	157	17.3	3.05	1
High	A8K319	cDNA FLJ76655, highly similar to Homo sapiens tripartite motif-containing 22, mRNA OS=Homo sapiens PE=2 SV=1	1.242	2.40964	1	1	1	498	56.9	3.34	1
High	P61962	DDB1- and CUL4-associated factor 7 OS=Homo sapiens GN=DCAF7 PE=1 SV=1	1.239	4.38596	1	1	1	342	38.9	3.04	1
High	A0A087WYR3	Tumor protein D54 OS=Homo sapiens GN=TPD52L2 PE=1 SV=1	1.238	8.55856	1	1	1	222	23.8	3.66	1
High	Q16531	DNA damage-binding protein 1 OS=Homo sapiens GN=DDB1 PE=1 SV=1	1.211	0.877193	1	1	1	1140	126.9	2.65	1
High	Q9ULW0	Targeting protein for Xklp2 OS=Homo sapiens GN=TPX2 PE=1 SV=2	1.204	2.81124	1	1	1	747	85.6	3.74	1
High	K7ES00	Histone H3.3 (Fragment) OS=Homo sapiens GN=H3F3B PE=1 SV=1	1.181	4.63576	1	1	1	151	16.6	1.93	1
High	P42357	Histidine ammonia-lyase OS=Homo sapiens GN=HAL PE=1 SV=1	1.152	1.21766	1	1	1	657	72.7	2.48	1
High	A0A024R509	Arylsulfatase A, isoform CRA_a OS=Homo sapiens GN=ARSA PE=4 SV=1	1.147	2.75049	1	1	1	509	53.8	3.74	1
High	B7Z268	Single-stranded DNA binding protein 1, isoform CRA_c OS=Homo sapiens GN=SSBP1 PE=2 SV=1	1.146	5.03145	1	1	1	159	18.5	2.18	1
High	Q92499	ATP-dependent RNA helicase DDX1 OS=Homo sapiens GN=DDX1 PE=1 SV=2	1.142	1.48649	1	1	1	740	82.4	3.21	1
High	Q86VQ1	Glucocorticoid-induced transcript 1 protein OS=Homo sapiens GN=GLCCI1 PE=1 SV=1	1.141	1.64534	1	1	1	547	58	2.64	1
High	A0A024R2M7	Oxidative-stress responsive 1, isoform CRA_a OS=Homo sapiens GN=OXSR1 PE=4 SV=1	1.137	1.51803	1	1	1	527	58	2.71	1
High	A0A140VJL8	Testicular tissue protein Li 94 OS=Homo sapiens PE=2 SV=1	1.134	3.27381	1	1	1	336	36.7	3.1	1
Medium	Q5R3I4	Tetratricopeptide repeat protein 38 OS=Homo sapiens GN=TTC38 PE=1 SV=1	1.124	2.34542	1	1	1	469	52.8	2.12	1
Medium	P42025	Beta-centractin OS=Homo sapiens GN=ACTR1B PE=1 SV=1	1.12	1.8617	1	1	1	376	42.3	2.24	1
Medium	Q15654	Thyroid receptor-interacting protein 6 OS=Homo sapiens GN=TRIP6 PE=1 SV=3	1.119	2.52101	1	1	1	476	50.3	3.16	1
Medium	Q9GZT1	Poly(RC) binding protein 4, isoform CRA_a OS=Homo sapiens GN=PCBP4 PE=2 SV=1	1.115	3.30189	1	1	1	424	43.8	3.07	1
Medium	C1PHA2	Tyrosine-protein kinase receptor OS=Homo sapiens GN=KIF5B-ALK PE=2 SV=1	1.114	0.74174	1	1	1	1483	167.8	2.9	1
Medium	D3DNI3	Profilin (Fragment) OS=Homo sapiens GN=PFN2 PE=3 SV=1	1.109	4.11765	1	1	1	340	35.5	4.03	1
Medium	B2RCJ3	Neurexophilin OS=Homo sapiens PE=2 SV=1	1.103	5.53506	1	1	1	271	31.1	3.8	1
Medium	B9EG70	Nuclear protein, ataxia-telangiectasia locus OS=Homo sapiens GN=NPAT PE=2 SV=1	1.094	0.560617	1	1	1	1427	154.2	2.24	1
Medium	A0A024R396	Chromosome 11 open reading frame 54, isoform CRA_a OS=Homo sapiens GN=C11orf54 PE=4 SV=1	1.093	2.22222	1	1	1	315	35.1	1.93	1
Medium	Q9GZP4	PITH domain-containing protein 1 OS=Homo sapiens GN=PITHD1 PE=1 SV=1	1.093	4.2654	1	1	1	211	24.2	2.49	1
Medium	B3KTJ9	cDNA FLJ38393 fis, clone FEBRA2007212 OS=Homo sapiens PE=2 SV=1	1.076	1.62514	1	1	1	923	102.9	2.59	1
Medium	A0A140VK69	Aspartate aminotransferase OS=Homo sapiens PE=2 SV=1	1.067	1.93705	1	1	1	413	46.2	2.25	1
Medium	Q59FR8	Galectin (Fragment) OS=Homo sapiens PE=2 SV=1	1.064	2.71318	1	1	1	258	27.1	2.2	1
Medium	A8K646	cDNA FLJ75699, highly similar to Homo sapiens osteoclast stimulating factor 1 (OSTF1), mRNA OS=Homo sapiens PE=2 SV=1	1.063	3.73832	1	1	1	214	23.7	2.19	1
Medium	Q59EP1	Annexin (Fragment) OS=Homo sapiens PE=2 SV=1	1.062	2.35294	1	1	1	510	54.9	3.17	1
Medium	A0A126LB28	Uracil-DNA glycosylase OS=Homo sapiens GN=U81 PE=3 SV=1	1.054	3.13725	1	1	1	255	29	2.71	1
Medium	A8K3M9	cDNA FLJ76387, highly similar to Homo sapiens splicing factor, arginine/serine-rich 9 (SFRS9), mRNA OS=Homo sapiens PE=2 SV=1	1.049	7.23982	1	1	1	221	25.5	4.96	1
Medium	P02790	Hemopexin OS=Homo sapiens GN=HPX PE=1 SV=2	1.049	2.38095	1	1	1	462	51.6	2.32	1
Medium	A0A024R203	Proteasome (Prosome, macropain) activator subunit 3 (PA28 gamma Ki), isoform CRA_a OS=Homo sapiens GN=PSME3 PE=4 SV=1	1.036	2.64151	1	1	1	265	30.9	1.96	1
Medium	A8K8U1	cDNA FLJ77762, highly similar to Homo sapiens cullin-associated and neddylation-dissociated 1 (CAND1), mRNA OS=Homo sapiens PE=2 SV=1	1.031	1.05691	1	1	1	1230	136.2	3.37	1
Medium	Q13228	Selenium-binding protein 1 OS=Homo sapiens GN=SELENBP1 PE=1 SV=2	1.03	1.90678	1	1	1	472	52.4	2.71	1
Medium	A6NDG6	Glycerol-3-phosphate phosphatase OS=Homo sapiens GN=PGP PE=1 SV=1	1.03	4.36137	1	1	1	321	34	3.05	1
Medium	H7BY55	Complement decay-accelerating factor OS=Homo sapiens GN=CD55 PE=1 SV=2	1.02	1.45455	1	1	1	550	58.9	2.51	1
Medium	Q15126	Phosphomevalonate kinase OS=Homo sapiens GN=PMVK PE=1 SV=3	1.006	4.16667	1	1	1	192	22	2.38	1
Medium	P50238	Cysteine-rich protein 1 OS=Homo sapiens GN=CRIP1 PE=1 SV=3	0.998	9.09091	1	1	1	77	8.5	0	1
Medium	O43741	5'-AMP-activated protein kinase subunit beta-2 OS=Homo sapiens GN=PRKAB2 PE=1 SV=1	0.992	3.67647	1	1	1	272	30.3	2.96	1
Medium	B2RNR6	Zinc finger RNA binding protein OS=Homo sapiens GN=ZFR PE=2 SV=1	0.989	0.931099	1	1	1	1074	116.9	3.19	1
Medium	P62273	40S ribosomal protein S29 OS=Homo sapiens GN=RPS29 PE=1 SV=2	0.988	12.5	1	1	1	56	6.7	1.96	1
Medium	Q9UJY1	Heat shock protein beta-8 OS=Homo sapiens GN=HSPB8 PE=1 SV=1	0.982	5.10204	1	1	1	196	21.6	2.67	1
Medium	X5CMJ9	Proteasome subunit beta type OS=Homo sapiens GN=PSM8 PE=3 SV=1	0.975	2.89855	1	1	1	276	30.3	2.67	1
Medium	Q9H9T3	Elongator complex protein 3 OS=Homo sapiens GN=ELP3 PE=1 SV=2	0.967	2.55941	1	1	1	547	62.2	3.29	1
Medium	P30520	Adenylosuccinate synthetase isozyme 2 OS=Homo sapiens GN=ADSS PE=1 SV=3	0.966	1.97368	1	1	1	456	50.1	2.34	1
Medium	Q13315	Serine-protein kinase ATM OS=Homo sapiens GN=ATM PE=1 SV=4	0.963	0.327225	1	1	1	3056	350.5	3.27	1
Medium	P08240	Signal recognition particle receptor subunit alpha OS=Homo sapiens GN=SRPRA PE=1 SV=2	0.948	1.09718	1	1	1	638	69.8	2.38	1
Medium	Q9NQX4	Unconventional myosin-Vc OS=Homo sapiens GN=MYO5C PE=1 SV=2	0.944	0.574053	1	1	1	1742	202.7	2.17	1
Medium	A0A024RDV9	Spastic paraplegia 20 isoform 1 OS=Homo sapiens GN=SPG20 PE=2 SV=1	0.944	1.05105	1	1	1	666	72.8	1.75	1
Medium	P04843	Dolichyl-diphosphooligosaccharide--protein glycosyltransferase subunit 1 OS=Homo sapiens GN=RPN1 PE=1 SV=1	0.93	1.15321	1	1	1	607	68.5	0	1
Medium	P41743	Protein kinase C iota type OS=Homo sapiens GN=PRKCI PE=1 SV=2	0.926	1.67785	1	1	1	596	68.2	2.78	1
Medium	Q08945	FACT complex subunit SSRP1 OS=Homo sapiens GN=SSRP1 PE=1 SV=1	0.923	1.12835	1	1	1	709	81	2.08	1
Medium	H0YFN4	RIMS-binding protein 2 (Fragment) OS=Homo sapiens GN=RIMBP2 PE=4 SV=1	0.92	16.129	1	1	1	62	7.2	2.76	1
Medium	B2RDP6	cDNA, FLJ96709, highly similar to Homo sapiens glutamate rich WD repeat protein GRWD (GRWD), mRNA OS=Homo sapiens PE=2 SV=1	0.919	2.01794	1	1	1	446	49.4	2.47	1
Medium	Q96GA3	Protein LTV1 homolog OS=Homo sapiens GN=LTV1 PE=1 SV=1	0.902	4	1	1	1	475	54.8	4.53	1
Medium	P53582	Methionine aminopeptidase 1 OS=Homo sapiens GN=METAP1 PE=1 SV=2	0.902	3.88601	1	1	1	386	43.2	2.94	1
Medium	A0A087WZT3	BolA-like protein 2 OS=Homo sapiens GN=BOLA2 PE=1 SV=2	0.9	5.92105	1	1	1	152	16.9	2.65	1
Medium	P17980	26S protease regulatory subunit 6A OS=Homo sapiens GN=PSMC3 PE=1 SV=3	0.899	2.2779	1	1	1	439	49.2	3.08	1
Medium	Q96QA5	Gasdermin-A OS=Homo sapiens GN=GSDMA PE=1 SV=4	0.896	4.7191	1	1	1	445	49.3	4.72	1
Medium	A0A024R1L8	Potassium inwardly-rectifying channel, subfamily J, member 4, isoform CRA_a OS=Homo sapiens GN=KCNJ4 PE=3 SV=1	0.891	1.79775	1	1	1	445	49.5	2.34	1
Medium	Q9BR76	Coronin-1B OS=Homo sapiens GN=CORO1B PE=1 SV=1	0.889	5.93047	1	1	1	489	54.2	4.75	1
Medium	Q9NYA4	Myotubularin-related protein 4 OS=Homo sapiens GN=MTMR4 PE=1 SV=2	0.885	0.669456	1	1	1	1195	133.3	2.46	1
Medium	Q96T37	Putative RNA-binding protein 15 OS=Homo sapiens GN=RBM15 PE=1 SV=2	0.883	0.716479	1	1	1	977	107.1	2.13	1
Medium	Q4LE65	PIK3C2B variant protein (Fragment) OS=Homo sapiens GN=PIK3C2B variant protein PE=2 SV=1	0.882	1.03343	1	1	1	1645	185.8	4.15	1
Medium	Q9Y570	Protein phosphatase methylesterase 1 OS=Homo sapiens GN=PPME1 PE=1 SV=3	0.882	1.81347	1	1	1	386	42.3	2.08	1
Medium	P35249	Replication factor C subunit 4 OS=Homo sapiens GN=RFC4 PE=1 SV=2	0.878	2.47934	1	1	1	363	39.7	2.99	1
Medium	Q9Y3F4	Serine-threonine kinase receptor-associated protein OS=Homo sapiens GN=STRAP PE=1 SV=1	0.876	4	1	1	1	350	38.4	3.48	1
Medium	Q3B7T1	Erythroid differentiation-related factor 1 OS=Homo sapiens GN=EDRF1 PE=1 SV=1	0.875	0.646204	1	1	1	1238	138.4	2.39	1
