# Supplementary material for: Identification of PARP-7 substrates reveals a role for MARylation in microtubule control in ovarian cancer cells
Source: eLife. 2021 Jan 21;10:e60481. doi: 10.7554/eLife.60481 (PMC7884071; doi:10.7554/eLife.60481)
Supplement: Supplementary file 4. — Sequences of the trypsinized peptides from the asPARP-7 protein identifications shown in Supplementary file 3. [file elife-60481-supp4.xlsx]

## Sheet: Legend and Contents
Table S4. Sequences of the tryptic peptides from the asPARP-7 protein identifications. Sequences of the trypsinized peptides from the asPARP-7 protein identifications shown in Table S2.
Column Heading	Description
UniProt ID	UniProt Accession ID for LC-MS/MS peptide
Peptide	Peptide sequence, assigned by Sequest
Positions in Master Proteins	Position of the peptide in the Master Protein
Tab	Contents
Legend and Contents	Heading Annotation Information Describing Metrics of Each of the LC-MS/MS Identified Peptides in this Table
OVCAR4 Peptide Replicate 1	Peptides from On-bead Trypsinization of asPARP-7 catalyzed 8-Bu(3-yne)T-ADP-ribosylated Proteins in OVCAR4 Cells from the 1st Replicate
OVCAR4 Peptide Replicate 2	Peptides from On-bead Trypsinization of asPARP-7 catalyzed 8-Bu(3-yne)T-ADP-ribosylated Proteins in OVCAR4 Cells from the 2nd Replicate
HeLa Peptide Replicate 1	Peptides from On-bead Trypsinization of asPARP-7 catalyzed 8-Bu(3-yne)T-ADP-ribosylated Proteins in Hela Cells from the 1st Replicate
HeLa Peptide Replicate 2	Peptides from On-bead Trypsinization of asPARP-7 catalyzed 8-Bu(3-yne)T-ADP-ribosylated Proteins in Hela Cells from the 2nd Replicate

## Sheet: OVCAR4 Peptide Replicate 1 
UniProt ID	Peptide Sequence	Positions in Master Proteins
Q9CY58	[K].SAAQAAAQTNSNAAGK.[Q]	Q9CY58 [53-68]
Q922F4	[R].EIVHIQAGQCGNQIGTK.[F]	Q922F4 [3-19]
Q8C2Q3	[R].LSESQLSFR.[R]	Q8C2Q3 [617-625]
Q32P04	[R].TEAESWYQTK.[Y]	Q32P04 [349-358]
P20029	[K].MKETAEAYLGK.[K]	P20029 [154-164]
Q99MR6	[R].VALSEPQPER.[R]	Q99MR6 [449-458]
E9QNP0	[R].TLSDYNIQK.[E]	E9QNP0 [159-167]
Q3TXM9	[R].EAGDVCYADVQK.[D]	Q3TXM9 [134-145]
P50247	[K].VPAINVNDSVTK.[S]	P50247 [175-186]
P60710	[K].QEYDESGPSIVHR.[K-]	P60710 [360-372]
Q8BVQ9	[R].FDDGAGGDNEVQR.[T]	Q8BVQ9 [327-339]
P50446; Q6IME9	[K].DVDAAYMNKVELQAK.[AV]	P50446 [262-276]; Q6IME9 [244-258]
Q3THJ6	[K].MLSCAGADR.[LS]	Q3THJ6 [102-110]
Q3UAD6	[K].GVVDSDDLPLNVSR.[E]	Q3UAD6 [435-448]
P07356	[K].TPAQYDASELK.[A]	P07356 [105-115]
Q571M2	[K].ELSTTLNADEAVTR.[G]	Q571M2 [449-462]
Q9D6F9	[K].EVDEQMLSVQSK.[N]	Q9D6F9 [325-336]
F7BGR7	[R].VADLTEQYNEQYGAVR.[T]	F7BGR7 [299-314]
Q8BG13	[R].AMNGESLDGR.[Q]	Q8BG13 [66-75]
D3Z3N4	[R].DGMDNQGGYGSVGR.[M]	D3Z3N4 [288-301]
Q9WV02	[R].DSYESYGNSR.[S]	Q9WV02 [283-292]
P63101	[K].SVTEQGAELSNEER.[N]	P63101 [28-41]
E9Q557	[R].AESGPDLR.[Y]	E9Q557 [20-27]
P27773	[R].LAPEYEAAATR.[L]	P27773 [63-73]
O08583	[K].QQLSAEELDAQLDAYNAR.[M]	O08583 [234-251]
Q3UZG3	[R].SSGSPYGGGYGSGGGSGGYGSR.[R]	Q3UZG3 [356-377]
Q3TF18	[K].ASLCISTK.[K]	Q3TF18 [427-434]
P60710	[K].LCYVALDFEQEMATAASSSSLEK.[SG]	P60710 [216-238]
Q3TFF0	[K].NVLCSACSGQGGK.[S]	Q3TFF0 [140-152]
Q61781	[K].VVSTHEQVLR.[T]	Q61781 [472-481]
P05214	[K].YMACCMLYR.[G]	P05214 [312-320]
O88569	[R].GGSDGYGSGR.[G]	O88569 [229-238]
P20029	[K].ETAEAYLGK.[K]	P20029 [156-164]
A0A0A0MQ97	[R].VTDSSVSVQLR.[E]	A0A0A0MQ97 [280-290]
Q9QYJ3	[R].EALCGCTVNVPTLDGR.[T]	Q9QYJ3 [264-279]
Q32P04	[R].EYQELMNTKLALDVEIATYR.[K]	Q32P04 [446-465]
P20029	[K].DAGTIAGLNVMR.[I]	P20029 [187-198]
Q3UK83	[R].NQGGYGGSSSSSSYGSGR.[R]	Q3UK83 [354-371]
Q58EU8	[K].DSTYSMSSTLTLTK.[D]	Q58EU8 [195-208]
Q9Z2T6	[R].LLEGEEQR.[L]	Q9Z2T6 [426-433]
Q3UK83	[R].SSGPYGGGGQYFAKPR.[N]	Q3UK83 [338-353]
P62852	[K].LITPAVVSER.[L]	P62852 [67-76]
P63038	[K].NAGVEGSLIVEK.[I]	P63038 [482-493]
Q9Z2T6	[R].LCEGVGSVNVCVSSSR.[G]	Q9Z2T6 [434-449]
P07356	[K].SLYYYIQQDTK.[G]	P07356 [314-324]
P07356	[R].QDIAFAYQR.[R]	P07356 [69-77]
P41105	[K].QTYSTEPNNLK.[A]	P41105 [23-33]
P38647	[R].QAASSLQQASLK.[L]	P38647 [635-646]
Q20BD0	[K].EVYQQQQYGSGGR.[G]	Q20BD0 [238-250]
Q6ZWU9	[R].LTEGCSFR.[R]	Q6ZWU9 [73-80]
Q3U900	[R].FPLFGGWK.[T]	Q3U900 [321-328]
P02535	[R].VLDELTLSK.[S]	P02535 [256-264]
E9Q7G0	[R].ATSSTQSLAR.[L]	E9Q7G0 [1832-1841]
E9Q557	[R].QVQNLVNK.[S]	E9Q557 [446-453]
Q3UIF3	[R].NPDDITNEEYGEFYK.[S]	Q3UIF3 [301-315]
Q3UA81	[K].EVSTYIK.[K]	Q3UA81 [173-179]
P62717	[R].DLTTAGAVTQCYR.[D]	P62717 [99-111]
Q9CZI5	[K].ANPFGGASHAK.[G]	Q9CZI5 [38-48]
Q8VH51	[R].TDASSASSFLDSDELER.[T]	Q8VH51 [330-346]
Q3TFF0	[K].VSLEDLYNGK.[T]	Q3TFF0 [122-131]
Q9D0E1	[R].MGANSLER.[M]	Q9D0E1 [570-577]; [583-590]
E9Q035	[R].SAAPSTLDSSSTAPAQLGK.[K]	E9Q035 [916-934]
P63038	[K].VGEVIVTK.[D]	P63038 [345-352]
Q9QWL7	[K].ATMQNLNDR.[L]	Q9QWL7 [86-94]
P68373; A0A0A0MQA5	[K].YMACCLLYR.[G]	P68373 [312-320]; A0A0A0MQA5 [341-349]
Q3UV17	[K].AEAEALYQTK.[FL]	Q3UV17 [354-363]
Q32P04	[R].EYQELMNTK.[L]	Q32P04 [446-454]
E9Q557	[R].LQSLTENLTK.[E]	E9Q557 [1718-1727]
Q60932	[K].LTLSALIDGK.[N]	Q60932 [270-279]
Q3UDJ7	[R].ELPPDQAEYCIAR.[M]	Q3UDJ7 [871-883]
P20029	[K].SQIFSTASDNQPTVTIK.[V]	P20029 [449-465]
P20029	[K].NQLTSNPENTVFDAK.[R]	P20029 [83-97]
Q9EQD6	[R].DQYEQMAEK.[N]	Q9EQD6 [287-295]
P08730	[R].SLLEGQDAK.[M]	P08730 [399-407]
H7BX95	[R].EAGDVCYADVYR.[D]	H7BX95 [143-154]
Q9QXT0	[R].INPDGSQSVVEVPYAR.[S]	Q9QXT0 [58-73]
Q80V08	[K].EQIVPKPEEEVAQK.[K]	Q80V08 [164-177]
Q5I0T8	[K].VWLDPNETNEIANANSR.[Q]	Q5I0T8 [22-38]
O70569	[R].IEDVTPIPSDSTR.[R]	O70569 [129-141]
Q3UCL7	[R].ELAEDGYSGVEVR.[V]	Q3UCL7 [28-40]
P50446; P04104; Q8BGZ7; Q8VED5; P11679; Q32P04; B2RTP7	[KR].YEDEINKR.[TA]	P50446 [242-249]; P04104 [278-285]; Q8BGZ7 [240-247]; Q8VED5 [230-237]; P11679 [185-192]; Q32P04 [252-259]; B2RTP7 [289-296]
Q61765; Q497I4	[R].LECEINTYR.[GS]	Q61765 [349-357]; Q497I4 [390-398]
Q02257	[R].TMQNTSDLDTAR.[C]	Q02257 [192-203]
Q3TL71	[R].NTDEMVELR.[I]	Q3TL71 [38-46]
Q9WV02	[R].SDLYSSGR.[D]	Q9WV02 [332-339]
P63038	[K].VGLQVVAVK.[A]	P63038 [293-301]
Q32MW3	[K].TYGESMLYLDGQR.[H]	Q32MW3 [408-420]
Q9WV02	[R].DYAPPPR.[D]	Q9WV02 [233-239]
Q3U9P0	[K].AEAGAGSATEFQFR.[G]	Q3U9P0 [140-153]
Q8BFZ3; P60710; P68134	[R-].HQGVMVGMGQK.[D]	Q8BFZ3 [41-51]; P60710 [40-50]; P68134 [42-52]
Q3TL71	[K].GSDFDCELR.[L]	Q3TL71 [140-148]
Q3TWG2	[K].YEQGTGCWQGPNR.[S]	Q3TWG2 [458-470]
J3QMP9	[R].FIHQVNQAAVTIQR.[W]	J3QMP9 [258-271]
Q9EQD6	[R].GQTGGDVNVEMDAAPGVDLSR.[I]	Q9EQD6 [260-280]
P50446; Q6IFZ8	[K].QEIAEINR.[MI]	P50446 [368-375]; Q6IFZ8 [368-375]
P60710; P68134	[K].AGFAGDDAPR.[A]	P60710 [19-28]; P68134 [21-30]
P07356	[R].AEDGSVIDYELIDQDAR.[E-]	P07356 [180-196]
E9Q557	[R].SQLQISNNR.[T]	E9Q557 [1766-1774]
Q3THJ6	[K].EHVIEALR.[R]	Q3THJ6 [146-153]
Q3U741	[K].VLEEANQAINPK.[L]	Q3U741 [457-468]
Q02257	[K].AAMIVNQLSK.[K]	Q02257 [162-171]
Q02257	[R].LAEPSQLLK.[S]	Q02257 [116-124]
P63038	[R].TVIIEQSWGSPK.[V]	P63038 [61-72]
Q3V0Z8; Q3U741	[R].GVEICIATPGR.[L]	Q3V0Z8 [292-302]; Q3U741 [215-225]
Q3UCL7	[K].DEILPTTPISEQK.[G]	Q3UCL7 [215-227]
Q8VIJ6	[R].FGQGGAGPVGGQGPR.[G]	Q8VIJ6 [659-673]
Q8C1B2	[K].KASYSHNFSK.[K]	Q8C1B2 [568-577]
Q3UXQ6	[K].DANGNSFATR.[L]	Q3UXQ6 [212-221]
Q62425	[K].FYSVNVDYSK.[L]	Q62425 [65-74]
A6ZI44	[R].ALANSLACQGK.[Y]	A6ZI44 [386-396]
Q61765	[R].LNVEVDAAPTVDLNR.[V]	Q61765 [209-223]
Q8C2Q7	[R].GLPWSCSADEVQR.[F]	Q8C2Q7 [17-29]
E9PYL9	[K].YDGIILPGK.[-]	E9PYL9 [170-178]
E9Q3E2	[R].QLQALLAR.[N]	E9Q3E2 [956-963]
H3BJW3	[R].TPLSEAEFEEIMNR.[N]	H3BJW3 [444-457]
Q3UF16	[R].QYFPNDEDQVGAAK.[A]	Q3UF16 [119-132]
Q99LX5	[R].EALLAALGYK.[N]	Q99LX5 [76-85]
Q9WV02	[R].GPPPSYGGSSR.[Y]	Q9WV02 [299-309]
Q8C2Q7; P70333	[K].HTGPNSPDTANDGFVR.[L]	Q8C2Q7 [99-114]; P70333 [99-114]
P29341	[R].SLGYAYVNFQQPADAER.[A]	P29341 [51-67]
Q9DBN5	[K].GPILCFVGPPGVGK.[T]	Q9DBN5 [368-381]
P70372	[R].VLVDQTTGLSR.[G]	P70372 [137-147]
Q545F4	[R].QLSSGVSEIR.[Q]	Q545F4 [84-93]
B2RTP7	[R].DYQELMNTK.[L]	B2RTP7 [483-491]
Q9Z2T6	[RK].FAAFIDK.[V]	Q9Z2T6 [134-140]
Q3U741	[R].ELAQQVQQVADDYGK.[C]	Q3U741 [176-190]
Q9DB79	[KR].EAIEGTYIDK.[K]	Q9DB79 [49-58]
P18406	[K].NVMMIQSCK.[C]	P18406 [344-352]
P38647	[K].SQVFSTAADGQTQVEIK.[V]	P38647 [469-485]
Q20BD0	[KR].FGEVVDCTLK.[LMT]	Q20BD0 [98-107]
Q3TRW3	[K].QFLPFLQR.[A]	Q3TRW3 [516-523]
Q3TL71	[R].TDYNASVSVPDSSGPER.[IY]	Q3TL71 [70-86]
P18406	[K].YCGSCVDGR.[C]	P18406 [311-319]
P62301	[R].LILIESR.[I]	P62301 [115-121]
Q9EQD6	[K].NHEEEMLALR.[G]	Q9EQD6 [250-259]
Q7TMM9; P99024; P68372	[K].EVDEQMLNVQNK.[N]	Q7TMM9 [325-336]; P99024 [325-336]; P68372 [325-336]
P97461	[R].QAVDVSPLR.[R]	P97461 [137-145]
A0A0A6YX26	[R].SAINEVVTR.[E]	A0A0A6YX26 [15-23]
A0A0A0MQ97	[R].VTDSSVSVQLRE.[-]	A0A0A0MQ97 [280-291]
P08730; P19001	[K].ITMQNLNDR.[L]	P08730 [98-106]; P19001 [85-93]
P63038	[K].LSDGVAVLK.[V]	P63038 [397-405]
Q32P04	[R].SRTEAESWYQTK.[Y]	Q32P04 [347-358]
Q3TIE8	[K].NETLGGTCLNVGCIPSK.[A]	Q3TIE8 [73-89]
Q58EU8	[R].HNSYTCEATHK.[T]	Q58EU8 [214-224]
O70569	[K].TPGPGAQSALR.[A]	O70569 [107-117]
Q61765	[R].ILDELTLCK.[SA]	Q61765 [165-173]
Q9DCC4	[R].IAAQTLLGTAK.[M]	Q9DCC4 [208-218]
Q3TJ43	[K].LLDEAIQAVK.[V]	Q3TJ43 [15-24]
E9Q557	[R].LLQLQEQMR.[A]	E9Q557 [154-162]
Q3UDJ7	[K].LSGSNPYTTVTPQIINSK.[W]	Q3UDJ7 [606-623]
P62301	[K].GLSQSALPYR.[R]	P62301 [10-19]
P62830	[K].DGVFLYFEDNAGVIVNNKGEMK.[G]	P62830 [92-113]
Q7TMM9; Q9ERD7; P99024	[R].AILVDLEPGTMDSVR.[S]	Q7TMM9 [63-77]; Q9ERD7 [63-77]; P99024 [63-77]
Q9QWL7	[R].QFTSSSSIK.[G]	Q9QWL7 [7-15]
Q3V0Z8; Q3U741	[K].APILIATDVASR.[G]	Q3V0Z8 [467-478]; Q3U741 [390-401]
Q6IME9	[R].FLEQQNQVLETK.[W]	Q6IME9 [154-165]
Q9QYJ3	[R].NPFDTFFGQR.[N]	Q9QYJ3 [110-119]
B2CSK2	[K].NQVAMNPQNTVFDAK.[R]	B2CSK2 [59-73]
Q3UIF3	[R].APFDLFENR.[K]	Q3UIF3 [348-356]
P62830	[R].LPAAGVGDMVMATVK.[K]	P62830 [52-66]
P38647	[K].DAGQISGLNVLR.[V]	P38647 [207-218]
Q9EQD6	[K].ASLENSLEETK.[G]	Q9EQD6 [351-361]
P50446; Q6IME9; Q32P04	[K].DVDAAYMNK.[V]	P50446 [262-270]; Q6IME9 [244-252]; Q32P04 [272-280]
P20029	[K].ELEEIVQPIISK.[L]	P20029 [623-634]
Q5BLK1	[K].DIPGLTDTTVPR.[R]	Q5BLK1 [120-131]
Q3TF25	[R].YATALYSAASK.[E]	Q3TF25 [41-51]
P08730; P19001; Q9QWL7	[R].LASYLDKVR.[A]	P08730 [107-115]; P19001 [94-102]; Q9QWL7 [95-103]
Q9JJI8	[K].QSLPPGLAVK.[D]	Q9JJI8 [58-67]
Q9QWL7	[R].GQVGGEINVEMDAAPGVDLSR.[I]	Q9QWL7 [231-251]
P05214	[K].YMACCMLYR.[G]	P05214 [312-320]
Q3U741	[R].CTYLVLDEADR.[M]	Q3U741 [240-250]
P18406	[R].IYQNGESFQPNCK.[H]	P18406 [106-118]
P97350	[R].SPNQNVQQAAAGALR.[N]	P97350 [299-313]
P68373; A0A0A0MQA5	[K].YMACCLLYR.[G]	P68373 [312-320]; A0A0A0MQA5 [341-349]
P38647	[K].LYSPSQIGAFVLMK.[M]	P38647 [160-173]
P18406	[R].ICEVRPCGQPVYSSLK.[K]	P18406 [264-279]
B7U582; P63017; B2CSK2; P17879	[K].ITITNDK.[G]	B7U582 [504-510]; P63017 [501-507]; B2CSK2 [503-509]; P17879 [501-507]
P70182	[R].IVVMNNLLPR.[S]	P70182 [226-235]
Q8C1B2	[R].YTMGSHGMR.[R]	Q8C1B2 [596-604]
Q6F4J0	[K].QLCAEHGISPEGIVEEFATEGTDR.[K]	Q6F4J0 [24-47]
Q3UCL7	[K].GGKPEPPAMPQPVPTA.[-]	Q3UCL7 [228-243]
E9Q3E2	[R].GSSMSSPPPLPPPPPMSPSWSER.[S]	E9Q3E2 [917-939]
Q3U536	[K].VDNDENEHQLSLR.[T]	Q3U536 [33-45]
H3BJW3	[K].GFALVGVGSEASSK.[K]	H3BJW3 [125-138]
Q8C2Q3; F7BGR7	[K].IFVGNVSAACTSQELR.[S]	Q8C2Q3 [81-96]; F7BGR7 [81-96]
B2RTM0	[R].ISGLIYEETR.[G]	B2RTM0 [47-56]
P08730	[K].EFSNQVVGQVNVEMDATPGIDLTR.[V]	P08730 [241-264]
Q3UA81	[R].LPLQDVYK.[I]	Q3UA81 [248-255]
P20029; B7U582; P63017; B2CSK2; P17879	[RK].VEIIANDQGNR.[IT]	P20029 [51-61]; B7U582 [27-37]; P63017 [26-36]; B2CSK2 [28-38]; P17879 [26-36]
E9QNN1	[R].DFVNYLVR.[I]	E9QNN1 [64-71]
Q9EQD6	[R].GQTGGDVNVEMDAAPGVDLSR.[I]	Q9EQD6 [260-280]
P09103	[K].VDATEESDLAQQYGVR.[G]	P09103 [84-99]
P05214	[K].YMACCMLYR.[G]	P05214 [312-320]
E9Q8Z8	[R].IYISLLK.[E]	E9Q8Z8 [667-673]
P09405	[K].FAISELFAK.[N]	P09405 [327-335]
Q58EU8	[R].QNGVLNSWTDQDSK.[D]	Q58EU8 [181-194]
Q3TXK6	[K].SFQQELDAR.[H]	Q3TXK6 [41-49]
E9Q3G8	[R].EGSVLDILK.[T]	E9Q3G8 [601-609]
P60122	[R].GTEDITSPHGIPLDLLDR.[V]	P60122 [340-357]
P05214; P68373; A0A0A0MQA5	[R].FDGALNVDLTEFQTNLVPYPR.[I]	P05214 [244-264]; P68373 [244-264]; A0A0A0MQA5 [273-293]
P56480	[K].VALVYGQMNEPPGAR.[A]	P56480 [265-279]
Q8C1B2	[K].LSTELFQDK.[S]	Q8C1B2 [207-215]
Q9WV02	[R].YDDYSSSR.[D]	Q9WV02 [310-317]
Q9DB79	[K].QPTIFQNK.[K]	Q9DB79 [13-20]
Q3UFY8	[K].NLTLDQMIR.[I]	Q3UFY8 [345-353]
Q9EQD6	[R].ILNEMRDQYEQMAEK.[N]	Q9EQD6 [281-295]
Q3U3N7	[K].AIDLFTDAIK.[L]	Q3U3N7 [132-141]
Q3UAI4	[R].GIEKPPFELPDFIK.[R]	Q3UAI4 [499-512]
Q9EQD6; Q61781	[R].QFTSSSSMK.[G]	Q9EQD6 [7-15]; Q61781 [7-15]
Q3TVV6	[R].NFILDQTNVSAAAQR.[R]	Q3TVV6 [552-566]
Q32P04	[R].QSSVSFR.[S]	Q32P04 [4-10]
Q9DB79	[R].ILSGVVTK.[M]	Q9DB79 [72-79]
P50446; Q8BGZ7; Q8VED5	[RK].SRAEAESWYQTK.[Y]	P50446 [337-348]; Q8BGZ7 [335-346]; Q8VED5 [325-336]
P27773	[K].VDCTANTNTCNK.[Y]	P27773 [83-94]
Q9DB79	[R].VLLGETGK.[E]	Q9DB79 [23-30]
P60710; P68134	[K].EITALAPSTMK.[I]	P60710 [316-326]; P68134 [318-328]
Q3U4S9	[R].IEGLLAAFPK.[L]	Q3U4S9 [29-38]
B7U582; P63017	[K].STAGDTHLGGEDFDNR.[M]	B7U582 [224-239]; P63017 [221-236]
Q5CZY9	[K].YVDEASK.[K]	Q5CZY9 [125-131]
Q3THJ6	[K].FNADEFEDMVAEK.[R]	Q3THJ6 [176-188]
Q8VED5; P11679; Q32P04	[K].NKYEDEINK.[R]	Q8VED5 [228-236]; P11679 [183-191]; Q32P04 [250-258]
Q9WV02	[K].VEQATKPSFESGR.[R]	Q9WV02 [81-93]
Q3UCL7	[K].AELNEFLTR.[E]	Q3UCL7 [19-27]
Q9QWL7	[R].EQVHQTTR.[-]	Q9QWL7 [426-433]
Q7TMK9; Q3U8W9	[R].TGYTLDVTTGQR.[K]	Q7TMK9 [131-142]; Q3U8W9 [134-145]
Q02257	[R].HVAAGTQQPYTDGVR.[M]	Q02257 [541-555]
P18406	[K].CIVQTTSWSQCSK.[S]	P18406 [227-239]
Q03265	[R].ILGADTSVDLEETGR.[V]	Q03265 [59-73]
P27661	[R].AGLQFPVGR.[VI]	P27661 [22-30]
Q3UVI9	[R].YGLIGLNGIGK.[S]	Q3UVI9 [119-129]
Q64213	[R].AYIVQLQIEDLTR.[K]	Q64213 [51-63]
P02535	[K].QSLEASLAETEGR.[Y]	P02535 [385-397]
P11983	[K].FATEAAITILR.[I]	P11983 [516-526]
Q3UA81	[K].STTTGHLIYK.[C]	Q3UA81 [21-30]
Q61765; Q6IFX2; Q497I4; Q9EQD6; P08730; P02535; P19001; Q61781; Q9QWL7	[RK].LAADDFR.[TLVMS]	Q61765 [136-142]; Q6IFX2 [174-180]; Q497I4 [177-183]; Q9EQD6 [193-199]; P08730 [177-183]; P02535 [227-233]; P19001 [163-169]; Q61781 [201-207]; Q9QWL7 [164-170]
Q3UXQ6	[K].VNDTIQIDLETGK.[I]	Q3UXQ6 [156-168]
Q8BTM8	[R].LSPFMADIR.[E]	Q8BTM8 [656-664]
Q3THJ6	[K].MLSCAGADR.[LS]	Q3THJ6 [102-110]
Q3U741	[R].DWVLNEFR.[S]	Q3U741 [379-386]
Q497I4	[R].LASYLEK.[V]	Q497I4 [108-114]
P60710; P68134	[K].EITALAPSTMK.[I]	P60710 [316-326]; P68134 [318-328]
P62830	[K].GSAITGPVAK.[E]	P62830 [114-123]
Q9QWL7	[R].GQVGGEINVEMDAAPGVDLSR.[I]	Q9QWL7 [231-251]
P60710	[-R].GYSFTTTAER.[E]	P60710 [197-206]
Q9CZD3	[K].LPFAAAQIGNSFR.[N]	Q9CZD3 [309-321]
B2RQH0	[R].QEPSDSPMFIINR.[K]	B2RQH0 [201-213]
B7U582; P63017; B2CSK2; P17879	[R].TTPSYVAFTDTER.[L]	B7U582 [38-50]; P63017 [37-49]; B2CSK2 [39-51]; P17879 [37-49]
Q3UXQ6	[K].FDTGNLCMVTGGANLGR.[I]	Q3UXQ6 [175-191]
Q61990	[R].IITLAGPTNAIFK.[A]	Q61990 [58-70]
Q9WV02	[R].DYGHSSSR.[D]	Q9WV02 [245-252]
Q5CZY9	[K].TATAVAHCK.[R]	Q5CZY9 [44-52]
Q61781; Q9QWL7	[K].SEISELR.[R]	Q61781 [335-341]; Q9QWL7 [298-304]
Q08943	[K].ADVIQATGDAICIFR.[E]	Q08943 [189-203]
Q3UA53	[R].YVANLFPYK.[G]	Q3UA53 [80-88]
Q32P04	[R].TTAENEFVMLKK.[D]	Q32P04 [260-271]
E9Q557	[R].LNDSILQATEQR.[R]	E9Q557 [1268-1279]
Q8C1B2	[R].YTMGSHGMR.[R]	Q8C1B2 [596-604]
Q3UJI2	[K].TVALWDLR.[N]	Q3UJI2 [296-303]
Q64433	[K].VVLDDKDYFLFR.[D]	Q64433 [81-92]
Q6IFX2; Q61781; Q9QWL7	[R].MSVEADINGLR.[R]	Q6IFX2 [191-201]; Q61781 [218-228]; Q9QWL7 [181-191]
P07356	[R].RAEDGSVIDYELIDQDAR.[E-]	P07356 [179-196]
Q9WTP6	[K].NGFLLDGFPR.[T]	Q9WTP6 [94-103]
P18406	[K].GLECNFGASSTALK.[G]	P18406 [75-88]
P68372	[R].INVYYNEATGGK.[Y]	P68372 [47-58]
G3UXL2	[R].VTAVIPCFPYAR.[Q]	G3UXL2 [85-96]
Q9DBP5	[K].FLIDGFPR.[N]	Q9DBP5 [89-96]
B2CY77	[K].SDGIYIINLK.[R]	B2CY77 [43-52]
I6L985	[K].VTCVVVDISK.[D]	I6L985 [281-290]
Q58EU8	[R].FSGSGSGTDFTLK.[I]	Q58EU8 [87-99]
P62962	[K].TLVLLMGK.[E]	P62962 [109-116]
Q9D051	[K].VFLLGEEVAQYDGAYK.[V]	Q9D051 [53-68]
E9Q557	[R].QLQNIIQATSR.[E]	E9Q557 [283-293]
Q32P04	[R].LRSEIDNVK.[K]	Q32P04 [390-398]
P42128	[R].EFEFLMR.[Q]	P42128 [99-105]
P16125	[K].FIIPQIVK.[Y]	P16125 [120-127]
Q6PHZ5	[K].YGIIEEVVIK.[R]	Q6PHZ5 [356-365]
Q3TLR6	[K].NIAKDLNMSVDDFK.[V]	Q3TLR6 [315-328]
E9Q557	[R].LLQLQEQMR.[A]	E9Q557 [154-162]
P57759	[K].GALPLDTVTFYK.[TVS]	P57759 [39-50]
Q9JKR6	[K].NINADEAAAMGAVYQAAALSK.[A]	Q9JKR6 [408-428]
Q3UA81	[K].QLIVGVNK.[M]	Q3UA81 [147-154]
Q9DB79	[K].CPFTGNVSIR.[G]	Q9DB79 [60-69]
P08730; P19001	[K].ITMQNLNDR.[L]	P08730 [98-106]; P19001 [85-93]
Q9CW46	[R].GLPGDVTNQEVHDLLSDYELK.[Y]	Q9CW46 [65-85]
B2CSK2	[K].NQVAMNPQNTVFDAK.[R]	B2CSK2 [59-73]
Q9QXV1	[R].ILGDPEEESWSPSLTNLEK.[V]	Q9QXV1 [315-333]
Q3UF16	[R].FHDIISDAEIEIVK.[D]	Q3UF16 [340-353]
P46460	[R].LLDYVPIGPR.[F]	P46460 [608-617]
Q7TMM9; Q9D6F9; Q9ERD7; P99024; P68372; Q922F4	[K].NMMAACDPR.[H]	Q7TMM9 [298-306]; Q9D6F9 [298-306]; Q9ERD7 [298-306]; P99024 [298-306]; P68372 [298-306]; Q922F4 [298-306]
Q9R1P0	[K].LLDEVFFSEK.[I]	Q9R1P0 [55-64]
P60710	[K].EKLCYVALDFEQEMATAASSSSLEK.[SG]	P60710 [214-238]
P63038	[K].CEFQDAYVLLSEK.[K]	P63038 [237-249]
Q6ZWU9	[R].LVQSPNSYFMDVK.[C]	Q6ZWU9 [24-36]
Q7TMM9; Q9D6F9; Q9ERD7; P99024; P68372; Q922F4	[K].NMMAACDPR.[H]	Q7TMM9 [298-306]; Q9D6F9 [298-306]; Q9ERD7 [298-306]; P99024 [298-306]; P68372 [298-306]; Q922F4 [298-306]
P63038	[K].LVQDVANNTNEEAGDGTTTATVLAR.[S]	P63038 [97-121]
Q3TN61	[K].QVELALWDTAGQEDYDR.[L]	Q3TN61 [52-68]
D3YWJ3	[R].GTGIVSAPVPK.[K]	D3YWJ3 [201-211]
P62196	[R].IDILDSALLRPGR.[I]	P62196 [298-310]
Q3UXQ6	[K].FDTGNLCMVTGGANLGR.[I]	Q3UXQ6 [175-191]
Q3UCL7	[R].GLCAIAQAESLR.[Y]	Q3UCL7 [95-106]
A0A0A0MQ97	[R].TVIAQHHVAPR.[T]	A0A0A0MQ97 [223-233]
A6ZI44	[R].YASICQQNGIVPIVEPEILPDGDHDLKR.[C]	A6ZI44 [228-255]
Q8K3A9	[K].GRDPVEILIPK.[D]	Q8K3A9 [198-208]
Q9QY23	[R].ILNPLLDR.[V]	Q9QY23 [656-663]
P63038	[K].QSKPVTTPEEIAQVATISANGDKDIGNIISDAMK.[K]	P63038 [158-191]
A6ZI44	[R].YASICQQNGIVPIVEPEILPDGDHDLK.[R]	A6ZI44 [228-254]
P14211	[K].IDNSQVESGSLEDDWDFLPPK.[K]	P14211 [186-206]
Q7TMM9	[K].ESESCDCLQGFQLTHSLGGGTGSGMGTLLISK.[I]	Q7TMM9 [123-154]
Q9Z2T6; Q9DCV7	[K].LALDIEIATYR.[KR]	Q9Z2T6 [414-424]; Q9DCV7 [377-387]
E9Q7G0	[R].QSMAFSILNTPK.[K]	E9Q7G0 [2028-2039]
P62301	[K].GLAPDLPEDLYHLIKK.[A]	P62301 [79-94]
Q9QXV1	[R].VFAAEALLK.[R]	Q9QXV1 [10-18]
P62830	[K].ECADLWPR.[I]	P62830 [124-131]
Q8VDP4	[R].KEEEAVLVGGEWSPSLDGLDPQADPQVLVR.[T]	Q8VDP4 [353-382]
Q9CQU0	[R].ILFLDPSGK.[V]	Q9CQU0 [113-121]
P63017	[K].FELTGIPPAPR.[G]	P63017 [459-469]
B2RTP7	[K].VDPEIQNVK.[S]	B2RTP7 [188-196]
Q540E6	[K].ALAESWNAAFLESSAK.[E]	Q540E6 [136-151]
Q6ZQ58	[R].YGLECLFR.[YF]	Q6ZQ58 [926-933]
Q564E8	[R].IEEVPELPLVVEDK.[V]	Q564E8 [144-157]
P99024	[R].ISVYYNEATGGK.[Y]	P99024 [47-58]
Q6ZWN5	[R].KQVVNIPSFIVR.[L]	Q6ZWN5 [139-150]
Q8R0W0	[R].LSVEEAVAAGVVGGEIQEK.[L]	Q8R0W0 [2289-2307]; [2804-2822]; [3319-3337]; [3834-3852]; [4349-4367]; [4864-4882]; [5379-5397]; [5894-5912]; [6409-6427]
Q3THJ6	[R].LIPDGCGVK.[Y]	Q3THJ6 [190-198]
P02535	[K].SEITELR.[R]	P02535 [361-367]
Q3TVV6	[K].MCLFAGFQR.[K]	Q3TVV6 [569-577]
Q6IFX2	[R].TKYETELNLR.[M]	Q6IFX2 [181-190]
Q7TMM9; Q9D6F9; P99024; P68372	[K].TAVCDIPPR.[G]	Q7TMM9 [351-359]; Q9D6F9 [351-359]; P99024 [351-359]; P68372 [351-359]
Q8BTM8	[R].VTYTPMAPGSYLISIK.[Y]	Q8BTM8 [2485-2500]
Q9WV02	[K].LFIGGLNTETNEK.[A]	Q9WV02 [10-22]
Q9EQD6	[R].QSVEGDINGLR.[K]	Q9EQD6 [210-220]
P46460	[K].NFSGAELEGLVR.[A]	P46460 [435-446]
Q9D0E1	[R].LGSTVFVANLDYK.[V]	Q9D0E1 [201-213]
P08249	[K].IFGVTTLDIVR.[A]	P08249 [166-176]
Q3UUU2	[R].FAVGIVIGR.[N]	Q3UUU2 [281-289]
Q61753	[K].TLGILGLGR.[I]	Q61753 [147-155]
Q5EBQ6	[R].DFNHINVELSLLGK.[K]	Q5EBQ6 [37-50]
Q9CQZ5	[R].VVDLLVIK.[G]	Q9CQZ5 [81-88]
Q9D6F9; P68372	[R].AVLVDLEPGTMDSVR.[S]	Q9D6F9 [63-77]; P68372 [63-77]
E9QNP0	[K].TITLEVEPSDTIENVK.[A]	E9QNP0 [116-131]
A0JNY7	[R].FLLQDTVELR.[E]	A0JNY7 [296-305]
Q80X90	[K].VLFASQEIPASPFR.[V]	Q80X90 [823-836]
E9PYQ0	[K].YEKPKDEQK.[E]	E9PYQ0 [754-762]
Q3UDJ7	[K].EGLLLWCQR.[K]	Q3UDJ7 [168-176]
Q3TDX7	[R].DILTLDLSR.[V]	Q3TDX7 [427-435]
Q03265	[K].GMSLNLEPDNVGVVVFGNDK.[L]	Q03265 [104-123]
Q3TIV2	[K].TLEEILLER.[A]	Q3TIV2 [336-344]
Q9D0M3	[R].GLLSSLDHTSIR.[R]	Q9D0M3 [100-111]
I6L985	[K].TTPPSVYPLAPGSAAQTNSMVTLGCLVK.[G]	I6L985 [148-175]
D3YUM8	[R].FGPYYTEPVIAGLDPK.[T]	D3YUM8 [100-115]
P24547	[K].NLIDAGVDALR.[V]	P24547 [312-322]
Q60749	[K].KDDEENYLDLFSHK.[N]	Q60749 [139-152]
P62830	[R].LPAAGVGDMVMATVK.[K]	P62830 [52-66]
Q6A0A2	[K].AIAINTFLPK.[N]	Q6A0A2 [314-323]
Q9QWL7	[R].TMQALEIELQSQLSMK.[A]	Q9QWL7 [306-321]
P62830	[K].DGVFLYFEDNAGVIVNNKGEMK.[G]	P62830 [92-113]
P17742	[K].HTGPGILSMANAGPNTNGSQFFICTAK.[T]	P17742 [92-118]
E9PYL9	[K].VLEQLTGQTPVFSK.[A]	E9PYL9 [39-52]
Q6IFZ8	[K].TLNNRFASFIDK.[V]	Q6IFZ8 [158-169]
A0A0A0MQF6	[K].QASEGPLK.[G]	A0A0A0MQF6 [288-295]
Q3UDJ7	[K].ACLISLGYDVENDR.[Q]	Q3UDJ7 [793-806]
Q6F4J0	[R].AVLLDLEPR.[V]	Q6F4J0 [64-72]
Q922F4	[R].ISEQFSAMFR.[R]	Q922F4 [381-390]
Q32P04	[R].TTAENEFVMLK.[K]	Q32P04 [260-270]
I6L985	[K].APQVYTIPPPK.[E]	I6L985 [367-377]
Q3U741	[R].LIDFLESGK.[T]	Q3U741 [226-234]
P56480	[K].VLDSGAPIKIPVGPETLGR.[I]	P56480 [125-143]
Q3TF18; P11103	[K].GIYFADMVSK.[S]	Q3TF18 [894-903]; P11103 [893-902]
Q3TIE8	[R].VLGAHILGPGAGEMVNEAALALEYGASCEDIAR.[V]	Q3TIE8 [450-482]
P09103	[K].THILLFLPK.[S]	P09103 [257-265]
Q9D6F9; Q9ERD7; P99024; P68372	[R].IMNTFSVVPSPK.[V]	Q9D6F9 [163-174]; Q9ERD7 [163-174]; P99024 [163-174]; P68372 [163-174]
Q3UK83	[R].GFAFVTFDDHDSVDK.[I]	Q3UK83 [147-161]
P62889	[R].VCTLAIIDPGDSDIIR.[S]	P62889 [91-106]
Q149Z9	[K].GTGASGSFK.[L]	Q149Z9 [99-107]
P99024	[K].MAVTFIGNSTAIQELFKR.[I]	P99024 [363-380]
Q99MR6	[K].EICWNLQNIR.[L]	Q99MR6 [476-485]
Q3UK30	[K].AAIDWFDGK.[E]	Q3UK30 [342-350]
Q32P04	[K].YEELQQTAGR.[H]	Q32P04 [359-368]
B2CSK2; P17879	[K].DAGVIAGLNVLR.[I]	B2CSK2 [162-173]; P17879 [160-171]
Q6PGG6	[K].LADPVTPVETILQR.[C]	Q6PGG6 [322-335]
B2RTP7	[R].DYQELMNTK.[L]	B2RTP7 [483-491]
P04104	[R].TNAENEFVTIKK.[D]	P04104 [286-297]
Q8BTV2	[R].SIGVYDVVELK.[F]	Q8BTV2 [104-114]
Q32P04	[K].MFFDAELSQMQTHVSDTSVVLSMDNNR.[S]	Q32P04 [299-325]
G3UWG1	[R].ADLIAYLK.[K]	G3UWG1 [93-100]
P20152	[K].ILLAELEQLK.[G]	P20152 [130-139]
P48678	[R].IRIDSLSAQLSQLQK.[Q]	P48678 [297-311]
Q3TFF0	[K].EISFAYEVLSNPEK.[R]	Q3TFF0 [49-62]
Q8BTM8	[K].DAGEGLLAVQITDPEGKPK.[K]	Q8BTM8 [1574-1592]
P63017	[K].DNNLLGKFELTGIPPAPR.[G]	P63017 [452-469]
Q3U9P0	[K].KAEAGAGSATEFQFR.[G]	Q3U9P0 [139-153]
P63038	[R].GVMLAVDAVIAELKK.[Q]	P63038 [143-157]
Q3U8W9	[R].NLATTVTEEILEK.[S]	Q3U8W9 [347-359]
Q6IFX2; Q61781; Q9QWL7	[R].MSVEADINGLRR.[V]	Q6IFX2 [191-202]; Q61781 [218-229]; Q9QWL7 [181-192]
P05214; P68373; A0A0A0MQA5	[K].EDAANNYAR.[G]	P05214 [97-105]; P68373 [97-105]; A0A0A0MQA5 [126-134]
Q3V0Z8; Q3U741	[R].QTLMWSATWPK.[E]	Q3V0Z8 [349-359]; Q3U741 [272-282]
Q7TMM9; Q9D6F9; Q9ERD7; P99024; P68372	[R].ISEQFTAMFR.[R]	Q7TMM9 [381-390]; Q9D6F9 [381-390]; Q9ERD7 [381-390]; P99024 [381-390]; P68372 [381-390]
Q32P04	[R].VDALMDEINFMK.[M]	Q32P04 [287-298]
P50446; Q8BGZ7; Q8VED5	[R].AEAESWYQTK.[Y]	P50446 [339-348]; Q8BGZ7 [337-346]; Q8VED5 [327-336]
P24547	[R].FGVPVIADGGIQNVGHIAK.[A]	P24547 [357-375]
P11103	[R].VVSEDFLQDVSASTK.[S]	P11103 [453-467]
P11499	[K].HSQFIGYPITLYLEK.[E]	P11499 [205-219]
Q8VED5; P11679; Q32P04	[K].NKYEDEINKR.[T]	Q8VED5 [228-237]; P11679 [183-192]; Q32P04 [250-259]
Q922Q8	[K].WLDLKDNPLDPVLAK.[V]	Q922Q8 [112-126]
Q3UBW8	[K].ALAPTWEQLALGLEHSETVK.[I]	Q3UBW8 [208-227]
P51881	[K].EQGVLSFWR.[G]	P51881 [64-72]
P20029	[R].AKFEELNMDLFR.[S]	P20029 [326-337]
B2RTM0	[K].TVTAMDVVYALK.[R]	B2RTM0 [81-92]
P17879	[K].LLQDFFNGR.[D]	P17879 [349-357]
P38647	[K].SDIGEVILVGGMTR.[M]	P38647 [378-391]
P60766	[K].TPFLLVGTQIDLRDDPSTIEK.[L]	P60766 [108-128]
Q542I9	[R].VAEEHAPSIVFIDEIDAIGTK.[R]	Q542I9 [273-293]
F7BGR7	[K].LFIGNLPR.[E]	F7BGR7 [120-127]
P20029	[K].DNHLLGTFDLTGIPPAPR.[G]	P20029 [476-493]
Q3TN61	[K].HFCPNVPIILVGNK.[K-]	Q3TN61 [105-118]
Q9QWL7	[R].GQVGGEINVEMDAAPGVDLSR.[I]	Q9QWL7 [231-251]
O88569	[K].YHTINGHNAEVR.[K]	O88569 [174-185]
Q8C1B2	[R].YTMGSHGMR.[R]	Q8C1B2 [596-604]
Q9Z1N5	[R].AIVDCGFEHPSEVQHECIPQAILGMDVLCQAK.[S]	Q9Z1N5 [59-90]
B2CY77	[R].FTPGTFTNQIQAAFREPR.[L]	B2CY77 [103-120]
Q8C1B2	[R].LIEEANSR.[G]	Q8C1B2 [368-375]
P08730	[K].NHEEEMKEFSNQVVGQVNVEMDATPGIDLTR.[V]	P08730 [234-264]
B2RTM0	[K].TVTAMDVVYALKR.[Q]	B2RTM0 [81-93]
Q8BTV2	[K].LLELLPGK.[V]	Q8BTV2 [141-148]
Q52PE3	[K].FLVGFTNK.[G]	Q52PE3 [103-110]
Q3UFY8	[R].NVDPFHIYFCNLK.[I]	Q3UFY8 [232-244]
Q3U741	[K].GTAYTFFTPGNLK.[Q]	Q3U741 [437-449]
Q61176	[R].EGLYITEEIYK.[T]	Q61176 [256-266]
Q7TMM9; P99024; P68372	[K].EVDEQMLNVQNK.[N]	Q7TMM9 [325-336]; P99024 [325-336]; P68372 [325-336]
P21550	[K].DATNVGDEGGFAPNILENNEALELLK.[T]	P21550 [203-228]
Q61781	[R].ADLEMQIESLKEELAYLKK.[N]	Q61781 [239-257]
Q9CX86	[K].LFIGGLNVQTSESGLR.[G]	Q9CX86 [9-24]
Q3TQX5	[R].VGNLGLATSFFNER.[N]	Q3TQX5 [535-548]
Q61781; Q9QWL7	[R].EVATNSELVQSGK.[S]	Q61781 [322-334]; Q9QWL7 [285-297]
P17742	[R].VSFELFADK.[V]	P17742 [20-28]
Q9QWL7	[R].TMQALEIELQSQLSMK.[A]	Q9QWL7 [306-321]
P50446	[R].TAAENEFVTLKK.[D]	P50446 [250-261]
E9Q3E2	[K].VASEEEEVPLVVYLK.[E]	E9Q3E2 [256-270]
Q6IFX2	[K].DAEEWFFTKTEELNR.[E]	Q6IFX2 [280-294]
P62830	[R].LPAAGVGDMVMATVK.[K]	P62830 [52-66]
P70333	[R].VTGEADVEFATHEDAVAAMAK.[D]	P70333 [327-347]
Q9Z2X1	[R].TEMDWVLK.[H]	Q9Z2X1 [91-98]
P63017	[K].MKEIAEAYLGK.[TA]	P63017 [127-137]
P09411	[K].ALESPERPFLAILGGAK.[V]	P09411 [200-216]
Q9JJI8	[R].YLYTLVITDK.[E]	Q9JJI8 [41-50]
Q3UA81	[K].IGGIGTVPVGR.[V]	Q3UA81 [256-266]
P99024	[K].MAVTFIGNSTAIQELFKR.[I]	P99024 [363-380]
Q32MW3	[R].IFGGFLMR.[K]	Q32MW3 [310-317]
Q8C1B2	[R].VQNQFLWEK.[Y]	Q8C1B2 [498-506]
Q9QWL7	[K].ATMQNLNDR.[L]	Q9QWL7 [86-94]
A6ZI44	[R].VNPCIGGVILFHETLYQK.[A]	A6ZI44 [124-141]
I6L985	[K].APQVYTIPPPKEQMAK.[D]	I6L985 [367-382]
Q3UYD0	[K].NKQPVTDPLLTPVEK.[A]	Q3UYD0 [195-209]
	[R].AVMVDLEPTVVDEVR.[A]
P62852	[R].AALQELLSK.[G]	P62852 [86-94]
Q9WV02	[K].AIKVEQATKPSFESGR.[R]	Q9WV02 [78-93]
Q58EU8	[K].TSTSPIVK.[S]	Q58EU8 [225-232]
P63017	[R].MVNHFIAEFK.[R]	P63017 [237-246]
Q7TMK9	[K].VTEGLTDVILYHQPDDK.[K]	Q7TMK9 [266-282]
P19001	[R].LSVEADINGLR.[R]	P19001 [180-190]
Q9EQD6; P02535; Q61781	[KR].VTMQNLNDR.[L]	Q9EQD6 [115-123]; P02535 [146-154]; Q61781 [123-131]
E9Q557	[K].AITGFDDPFSGK.[T]	E9Q557 [2104-2115]
Q3V0Z8	[R].LIDFLECGK.[T]	Q3V0Z8 [303-311]
Q5M9M4	[R].MNVLADALK.[S]	Q5M9M4 [4-12]
Q542I9	[R].IETLDPALIRPGR.[I]	Q542I9 [334-346]
P14211	[K].KPEDWDEEMDGEWEPPVIQNPEYK.[G]	P14211 [249-272]
Q3V0Z8	[K].QVSDLISVLR.[E]	Q3V0Z8 [527-536]
P62830	[R].LNRLPAAGVGDMVMATVK.[K]	P62830 [49-66]
Q3U536	[K].DELHIVEAEAMNYEGSPIK.[V]	Q3U536 [55-73]
O88569	[R].GFGFVTFDDHDPVDK.[I]	O88569 [154-168]
P20029	[K].TFAPEEISAMVLTK.[M]	P20029 [140-153]
Q3V0Z8; Q3U741	[R].QTLMWSATWPK.[E]	Q3V0Z8 [349-359]; Q3U741 [272-282]
A0A0A0MQA5	[K].TIGGGDDSFTTFFCETGAGK.[H]	A0A0A0MQA5 [70-89]
Q3UXQ6	[R].TDITYPAGFMDVISIDK.[T]	Q3UXQ6 [78-94]
P50446	[R].TAAENEFVTLK.[K]	P50446 [250-260]
Q6IFX2; Q61781; Q9QWL7	[R].MSVEADINGLR.[R]	Q6IFX2 [191-201]; Q61781 [218-228]; Q9QWL7 [181-191]
Q3U536	[R].MTDQEAIQDLWQWR.[K]	Q3U536 [276-289]
P09405	[K].GFGFVDFNSEEDAK.[A]	P09405 [608-621]
P11679	[R].LEGLTDEINFLR.[Q]	P11679 [220-231]
Q9D0E1	[R].MGPLGLDHMASSIER.[M]	Q9D0E1 [456-470]
P50446; Q8BGZ7; Q6IFZ8	[K].YEELQVTAGR.[H]	P50446 [349-358]; Q8BGZ7 [347-356]; Q6IFZ8 [349-358]
P14211	[K].LFPSGLDQKDMHGDSEYNIMFGPDICGPGTK.[K]	P14211 [112-142]
Q3THQ5	[R].LAYINPDLALEEK.[N]	Q3THQ5 [352-364]
O88569	[R].GFGFVTFDDHDPVDKIVLQK.[Y]	O88569 [154-173]
Q8BL97	[R].NPPGFAFVEFEDPRDAEDAVR.[G]	Q8BL97 [74-94]
P51150	[K].EAINVEQAFQTIAR.[N]	P51150 [158-171]
P17879	[R].IINEPTAAAIAYGLDR.[T]	P17879 [172-187]
Q7TMK9; Q3U8W9	[K].AGPIWDLR.[L]	Q7TMK9 [185-192]; Q3U8W9 [188-195]
Q9QWL7	[R].GQVGGEINVEMDAAPGVDLSR.[I]	Q9QWL7 [231-251]
P09411	[K].ITLPVDFVTADKFDENAK.[T]	P09411 [280-297]
Q61782	[R].LLEGEDAHLSSSQFSSGSQSSR.[D]	Q61782 [40-61]
Q3UA81	[K].SGDAAIVDMVPGKPMCVESFSDYPPLGR.[F]	Q3UA81 [396-423]
P18406	[R].VTNDNPECR.[L]	P18406 [249-257]
Q8VH51	[R].VLGVPIIVQASQAEK.[N]	Q8VH51 [218-232]
Q91V81	[R].IFCGDLGNEVNDDILAR.[A]	Q91V81 [377-393]
B1AR51	[K].TLEDNLLSR.[L]	B1AR51 [3616-3624]
P51881	[K].DFLAGGVAAAISK.[T]	P51881 [11-23]
E9Q0B5	[R].ISVINGGSK.[A]	E9Q0B5 [1352-1360]
P52480	[K].GADFLVTEVENGGSLGSK.[K]	P52480 [189-206]
Q3UK30	[K].AAIDWFDGKEFSGNPIK.[V]	Q3UK30 [342-358]
Q3TL33	[K].EEIVDKYDLFVGSQATDFGEALVR.[H]	Q3TL33 [288-311]
Q7TMM9; Q9D6F9; Q9ERD7; P99024; P68372	[R].EIVHLQAGQCGNQIGAK.[F]	Q7TMM9 [3-19]; Q9D6F9 [3-19]; Q9ERD7 [3-19]; P99024 [3-19]; P68372 [3-19]
B2CY77	[R].AIVAIENPADVSVISSR.[N]	B2CY77 [64-80]
Q8C2Q7	[R].YGDGGSTFQSTTGHCVHMR.[G]	Q8C2Q7 [276-294]
Q9Z1N5	[R].ILVATNLFGR.[G]	Q9Z1N5 [340-349]
P02535	[R].ALEESNYELEGK.[I]	P02535 [164-175]
A0A077S9N1	[R].STDYGIFQINSR.[Y]	A0A077S9N1 [69-80]
Q9CQA9	[K].GKPLALVEEIR.[K]	Q9CQA9 [149-159]
P35700; O08807	[R].GLFIIDDK.[G]	P35700 [129-136]; O08807 [204-211]
Q5BLK2	[R].LIDLHSPSEIVK.[Q]	Q5BLK2 [88-99]
A2A5N3	[R].IVGTKPLYVALAQR.[K]	A2A5N3 [357-370]
P18760	[K].LGGSAVISLEGKPL.[-]	P18760 [153-166]
Q61781	[R].TMQNLEIELQSQLSMK.[A]	Q61781 [343-358]
Q3TJ21	[R].SLLINAVEASCIR.[T]	Q3TJ21 [252-264]
P27659	[R].HGSLGFLPR.[K]	P27659 [11-19]
P09103	[K].HNQLPLVIEFTEQTAPK.[I]	P09103 [233-249]
P62855	[K].LHYCVSCAIHSK.[V]	P62855 [71-82]
Q9D6F9; Q9ERD7; P99024; P68372	[R].IMNTFSVVPSPK.[V]	Q9D6F9 [163-174]; Q9ERD7 [163-174]; P99024 [163-174]; P68372 [163-174]
Q9CW46	[K].DSGPLPTPPGVSLLGEPPKDYR.[I]	Q9CW46 [488-509]
Q564E8	[R].QPYAVSELAGHQTSAESWGTGR.[A]	Q564E8 [50-71]
Q8C1B2	[R].FYCNPENDR.[M]	Q8C1B2 [293-301]
F6YVP7	[K].IAFAITAIK.[G]	F6YVP7 [26-34]
Q9EQD6	[R].GQTGGDVNVEMDAAPGVDLSR.[I]	Q9EQD6 [260-280]
Q3UCL7	[R].TEIIILATR.[T]	Q3UCL7 [46-54]
Q6IFX2	[R].ALEEANADLEVK.[I]	Q6IFX2 [114-125]
Q6IFX2; Q9EQD6; P08730; Q61782; P19001; Q61781; Q9QWL7	[R].LEQEIATYR.[RSN]	Q6IFX2 [387-395]; Q9EQD6 [406-414]; P08730 [390-398]; Q61782 [30-38]; P19001 [376-384]; Q61781 [414-422]; Q9QWL7 [377-385]
Q02257	[R].LNYGIPAIVK.[L]	Q02257 [478-487]
P38647	[K].STNGDTFLGGEDFDQALLR.[H]	P38647 [266-284]
Q32P04	[R].VDALMDEINFMK.[M]	Q32P04 [287-298]
Q32P04	[K].MFFDAELSQMQTHVSDTSVVLSMDNNR.[S]	Q32P04 [299-325]
Q6ZWN5	[K].QVVNIPSFIVR.[L]	Q6ZWN5 [140-150]
B7U582; P63017	[K].LLQDFFNGKELNK.[S]	B7U582 [352-364]; P63017 [349-361]
Q3UCL7	[K].FVDGLMIHSGDPVNYYVDTAVR.[H]	Q3UCL7 [152-173]
E9QNP0	[K].ESTLHLVLR.[LV]	E9QNP0 [168-176]
Q32P04	[R].VDALMDEINFMK.[M]	Q32P04 [287-298]
Q3UCL7	[K].KPLPDHVSIVEPK.[D]	Q3UCL7 [202-214]
Q9CWK0	[K].LVAIVDVIDQNR.[A]	Q9CWK0 [24-35]
Q3V0Z8	[K].TGTAYTFFTPNNIK.[Q]	Q3V0Z8 [513-526]
Q497E9	[K].ELEFYLR.[K]	Q497E9 [194-200]
Q7TMM9; Q9D6F9; Q9ERD7; P99024; P68372; Q922F4	[R].FPGQLNADLR.[K]	Q7TMM9 [242-251]; Q9D6F9 [242-251]; Q9ERD7 [242-251]; P99024 [242-251]; P68372 [242-251]; Q922F4 [242-251]
Q99M74	[K].LGLDIEIATYR.[R]	Q99M74 [409-419]
Q3TFF0	[K].LYDILGVPPGASENELKK.[A]	Q3TFF0 [9-26]
Q9EQD6; P02535; Q61781	[KR].VTMQNLNDR.[L]	Q9EQD6 [115-123]; P02535 [146-154]; Q61781 [123-131]
Q3TXE5	[K].APVPTGEVYFADSFDR.[G]	Q3TXE5 [63-78]
P02535	[R].LENEIQTYR.[S]	P02535 [440-448]
P52480	[R].LAPITSDPTEAAAVGAVEASFK.[C]	P52480 [401-422]
P08730	[K].QSPASPER.[D]	P08730 [135-142]
Q6ZWN5	[R].LFEGNALLR.[R]	Q6ZWN5 [71-79]
Q80V08	[K].SAEFLLHMLK.[N]	Q80V08 [97-106]
Q03265	[K].HALIIYDDLSK.[Q]	Q03265 [306-316]
E9Q557	[K].SVEEVASEIQPFLR.[G]	E9Q557 [2012-2025]
P68373	[K].AYHEQLTVAEITNACFEPANQMVK.[C]	P68373 [281-304]
Q9D0E1	[R].AFITNIPFDVK.[W]	Q9D0E1 [72-82]
Q9ERD7; Q922F4	[R].YLTVATVFR.[G]	Q9ERD7 [310-318]; Q922F4 [310-318]
Q7TMM9	[K].ESESCDCLQGFQLTHSLGGGTGSGMGTLLISK.[I]	Q7TMM9 [123-154]
Q8C2Q7	[K].SNNVEMDWVLK.[H]	Q8C2Q7 [88-98]
Q3UXQ6	[K].VRTDITYPAGFMDVISIDK.[T]	Q3UXQ6 [76-94]
Q3UXQ6	[K].GNKPWISLPR.[G]	Q3UXQ6 [231-240]
P05214; A0A0A0MQA5	[K].AYHEQLSVAEITNACFEPANQMVK.[C]	P05214 [281-304]; A0A0A0MQA5 [310-333]
Q564E8	[R].NIPGITLLNVSK.[L]	Q564E8 [223-234]
Q8VIJ6	[R].LFVGNLPADITEDEFKR.[L]	Q8VIJ6 [291-307]
Q8C2Q7	[R].YVELFLNSTAGASGGAYEHR.[Y]	Q8C2Q7 [356-375]
Q3V0Z8; Q3U741; Q3TQX5	[R].MLDMGFEPQIR.[KR]	Q3V0Z8 [328-338]; Q3U741 [251-261]; Q3TQX5 [352-362]
Q3UV17	[K].AQYEDIAQK.[S]	Q3UV17 [343-351]
Q3UXQ6	[R].TIRYPDPLIK.[V]	Q3UXQ6 [146-155]
Q7TMM9; Q9D6F9; Q9ERD7; P99024; P68372	[K].RISEQFTAMFR.[R]	Q7TMM9 [380-390]; Q9D6F9 [380-390]; Q9ERD7 [380-390]; P99024 [380-390]; P68372 [380-390]
B2RQH0	[R].QEPSDSPMFIINR.[K]	B2RQH0 [201-213]
P60710	[R].CPEALFQPSFLGMESCGIHETTFNSIMK.[C]	P60710 [257-284]
Q80V08	[K].KSAEFLLHMLK.[N]	Q80V08 [96-106]
I6L985	[K].CRVNSAAFPAPIEK.[T]	I6L985 [343-356]
P29341; A2A5N3	[K].GFGFVCFSSPEEATK.[A]	P29341 [334-348]; A2A5N3 [334-348]
Q9CPN9	[R].VSTVALPR.[S]	Q9CPN9 [124-131]
Q02257	[R].VSVELTNSLFK.[H]	Q02257 [664-674]
P04104	[K].RTNAENEFVTIKK.[D]	P04104 [285-297]
P56480	[K].VVDLLAPYAK.[G]	P56480 [189-198]
P05214; P68373	[K].DVNAAIATIK.[T]	P05214 [327-336]; P68373 [327-336]
P18406	[K].HQCTCIDGAVGCIPLCPQELSLPNLGCPNPR.[L]	P18406 [119-149]
Q9QWL7	[K].GSSGLGGGSSR.[T]	Q9QWL7 [16-26]
Q80V08	[R].INPYMSSPCHIEMILTEK.[E]	Q80V08 [146-163]
Q7TMM9; Q9D6F9; P99024; P68372	[R].LHFFMPGFAPLTSR.[G]	Q7TMM9 [263-276]; Q9D6F9 [263-276]; P99024 [263-276]; P68372 [263-276]
P04104	[R].TNAENEFVTIK.[K]	P04104 [286-296]
I6L985	[K].NTQPIMDTDGSYFVYSK.[L]	I6L985 [415-431]
Q3TVV6	[K].SSGPTSLFAVTVAPPGAR.[Q]	Q3TVV6 [182-199]
H3BJW3	[R].TPLSEAEFEEIMNR.[N]	H3BJW3 [444-457]
Q3UCL7	[K].FVDGLMIHSGDPVNYYVDTAVR.[H]	Q3UCL7 [152-173]
P05214; P68373	[K].RTIQFVDWCPTGFK.[V]	P05214 [339-352]; P68373 [339-352]
Q9JJI8	[R].YLYTLVITDKEK.[A]	Q9JJI8 [41-52]
Q3TF18; P11103	[R].TTNFAGILSQGLR.[I]	Q3TF18 [866-878]; P11103 [865-877]
Q3V0Z8; Q3U741; Q3TQX5	[R].MLDMGFEPQIR.[KR]	Q3V0Z8 [328-338]; Q3U741 [251-261]; Q3TQX5 [352-362]
H3BJW3	[K].VLISSLQDCLHGIESK.[S]	H3BJW3 [505-520]
Q5CZY9	[K].GPLQSVQVFGR.[K]	Q5CZY9 [31-41]
P63017	[K].SFYPEEVSSMVLTK.[M]	P63017 [113-126]
Q7TMM9; Q9D6F9; Q9ERD7; P99024; P68372; Q922F4	[K].NMMAACDPR.[H]	Q7TMM9 [298-306]; Q9D6F9 [298-306]; Q9ERD7 [298-306]; P99024 [298-306]; P68372 [298-306]; Q922F4 [298-306]
P97461	[R].VNQAIWLLCTGAR.[E]	P97461 [147-159]
Q6IFX2; Q61781	[R].GQVGGDVNVEMDAAPGVDLSR.[I]	Q6IFX2 [241-261]; Q61781 [268-288]
I6L985	[R].VNSAAFPAPIEK.[T]	I6L985 [345-356]
Q3TL71	[R].LLIHQSLAGGIIGVK.[G]	Q3TL71 [149-163]
A6ZI44	[K].IGEHTPSALAIMENANVLAR.[Y]	A6ZI44 [208-227]
Q7TMM9; Q9D6F9; Q9ERD7; P99024; P68372; Q922F4	[K].LAVNMVPFPR.[L]	Q7TMM9 [253-262]; Q9D6F9 [253-262]; Q9ERD7 [253-262]; P99024 [253-262]; P68372 [253-262]; Q922F4 [253-262]
P63017	[K].GPAVGIDLGTTYSCVGVFQHGK.[V]	P63017 [4-25]
B2RTP7	[R].GFSSGSAVVSGGSR.[R]	B2RTP7 [23-36]
Q8BFZ3; P60710	[R].TTGIVMDSGDGVTHTVPIYEGYALPHAILR.[L]	Q8BFZ3 [149-178]; P60710 [148-177]
P56480	[R].FTQAGSEVSALLGR.[I]	P56480 [311-324]
P05214; P68373; A0A0A0MQA5	[R].AFVHWYVGEGMEEGEFSEAR.[E]	P05214 [403-422]; P68373 [403-422]; A0A0A0MQA5 [432-451]
E9Q3E2	[K].SPGILGYNICPR.[G]	E9Q3E2 [1068-1079]
P05214; P68373; A0A0A0MQA5	[K].VGINYQPPTVVPGGDLAK.[V]	P05214 [353-370]; P68373 [353-370]; A0A0A0MQA5 [382-399]
Q9WV02	[R].IVEVLLMK.[D]	Q9WV02 [34-41]
Q03265	[R].TGAIVDVPVGEELLGR.[V]	Q03265 [134-149]
Q9DB79	[R].DVQIGDIVTVGECRPLSK.[T]	Q9DB79 [119-136]
P62301	[K].GLTPSQIGVILR.[D]	P62301 [44-55]
Q3UA81	[K].SGDAAIVDMVPGKPMCVESFSDYPPLGR.[F]	Q3UA81 [396-423]
Q9D6F9; Q9ERD7; P68372; Q922F4	[R].ALTVPELTQQMFDAK.[N]	Q9D6F9 [283-297]; Q9ERD7 [283-297]; P68372 [283-297]; Q922F4 [283-297]
Q9JJI8	[R].KIEEIKDFLLTAR.[R]	Q9JJI8 [4-16]
P63017; P17879	[K].QTQTFTTYSDNQPGVLIQVYEGER.[A]	P63017 [424-447]; P17879 [424-447]
Q3UCL7	[R].FGFPEGSVELYAEK.[V]	Q3UCL7 [77-90]
Q52KC1	[R].VLITTDLLAR.[GS]	Q52KC1 [326-335]
P68373	[R].AVFVDLEPTVIDEVR.[TA]	P68373 [65-79]
Q8BL97; P84104	[R].NPPGFAFVEFEDPR.[D]	Q8BL97 [74-87]; P84104 [44-57]
Q80V08	[K].GLDVDSLVIEHIQVNK.[A]	Q80V08 [116-131]
P63038	[K].TLNDELEIIEGMK.[F]	P63038 [206-218]
Q3UA81	[K].YYVTIIDAPGHR.[D]	Q3UA81 [85-96]
F6YVP7	[K].IPDWFLNR.[Q]	F6YVP7 [79-86]
Q3UW40	[R].QINWTVLYR.[R]	Q3UW40 [48-56]
Q3THJ6	[K].VDEFPLCGHMVSDEYEQLSSEALEAAR.[I]	Q3THJ6 [43-69]
Q9EQD6	[R].GQTGGDVNVEMDAAPGVDLSR.[I]	Q9EQD6 [260-280]
Q921L4	[R].LLLPGELAK.[H]	Q921L4 [101-109]
Q8BGZ7	[R].NMQEVVEDFK.[V]	Q8BGZ7 [228-237]
Q02257	[R].ALMGSPQLVAAVVR.[T]	Q02257 [178-191]
Q3UW40	[R].AITGASLADIMAK.[R]	Q3UW40 [81-93]
Q61782	[R].RLLEGEDAHLSSSQFSSGSQSSR.[D]	Q61782 [39-61]
Q7TMM9; Q9D6F9; P99024; P68372	[R].LHFFMPGFAPLTSR.[G]	Q7TMM9 [263-276]; Q9D6F9 [263-276]; P99024 [263-276]; P68372 [263-276]
P62301	[K].KGLTPSQIGVILR.[D]	P62301 [43-55]
P18406	[R].ICEVRPCGQPVYSSLKK.[G]	P18406 [264-280]
Q7TMM9; P68372	[K].MSATFIGNSTAIQELFK.[R]	Q7TMM9 [363-379]; P68372 [363-379]
Q9D6F9	[K].MAATFIGNSTAIQELFK.[R]	Q9D6F9 [363-379]
B7U582; P63017	[R].FEELNADLFR.[G]	B7U582 [305-314]; P63017 [302-311]
Q9EQD6; Q61781	[R].QFTSSSSMK.[G]	Q9EQD6 [7-15]; Q61781 [7-15]
P14211	[K].IDNSQVESGSLEDDWDFLPPKK.[I]	P14211 [186-207]
P63038	[R].AAVEEGIVLGGGCALLR.[C]	P63038 [430-446]
E9Q557	[R].LLEAQIATGGIIDPK.[E]	E9Q557 [2379-2393]
P84104	[R].NPPGFAFVEFEDPRDAADAVR.[E]	P84104 [44-64]
Q3TL71	[R].GSYGDLGGPIITTQVTIPK.[D]	Q3TL71 [378-396]
P08730; P02535	[R].QSVEADINGLR.[R]	P08730 [194-204]; P02535 [244-254]
Q9DB79	[K].NMSVHLSPCFR.[D]	Q9DB79 [108-118]
Q9DB79	[K].NMSVHLSPCFR.[D]	Q9DB79 [108-118]
Q3UXQ6	[K].GIPHLVTHDAR.[T]	Q3UXQ6 [135-145]
Q9QWL7	[K].DAEDWFFSK.[T]	Q9QWL7 [270-278]
P05214; P68373; A0A0A0MQA5	[R].AVCMLSNTTAIAEAWAR.[L]	P05214 [374-390]; P68373 [374-390]; A0A0A0MQA5 [403-419]
P99024	[R].ALTVPELTQQVFDAK.[N]	P99024 [283-297]
Q3UA81	[K].THINIVVIGHVDSGK.[S]	Q3UA81 [6-20]
Q3UW40	[K].VFQFLNAK.[C]	Q3UW40 [28-35]
Q3THJ6	[R].VHIGQVIMSIR.[T]	Q3THJ6 [129-139]
Q8C2Q7; P70333	[R].STGEAFVQFASQEIAEK.[A]	Q8C2Q7 [151-167]; P70333 [151-167]
P50446; P04104; Q6IME9; Q8BGZ7; Q8VED5; P11679; Q3UV17; Q9DCV7; Q32P04; B2RTP7	[K].FASFIDKVR.[F]	P50446 [163-171]; P04104 [199-207]; Q6IME9 [145-153]; Q8BGZ7 [161-169]; Q8VED5 [150-158]; P11679 [108-116]; Q3UV17 [176-184]; Q9DCV7 [96-104]; Q32P04 [173-181]; B2RTP7 [210-218]
Q61781	[R].TMQNLEIELQSQLSMK.[A]	Q61781 [343-358]
P63017	[K].SQIHDIVLVGGSTR.[I]	P63017 [329-342]
P05214	[K].EIVDLVLDR.[I]	P05214 [113-121]
Q9D6F9	[K].MAATFIGNSTAIQELFK.[R]	Q9D6F9 [363-379]
Q8BFZ3; P60710	[R].TTGIVMDSGDGVTHTVPIYEGYALPHAILR.[L]	Q8BFZ3 [149-178]; P60710 [148-177]
P04104	[R].FLEQQNQVLQTK.[W]	P04104 [208-219]
Q02257	[R].NEGTATYAAAVLFR.[I]	Q02257 [638-651]
Q6IFX2; Q61781; Q9QWL7	[R].MSVEADINGLRR.[V]	Q6IFX2 [191-202]; Q61781 [218-229]; Q9QWL7 [181-192]
Q32P04	[K].MFFDAELSQMQTHVSDTSVVLSMDNNR.[S]	Q32P04 [299-325]
P60710	[K].DLYANTVLSGGTTMYPGIADR.[M]	P60710 [292-312]
Q6IFX2; Q61781	[R].GQVGGDVNVEMDAAPGVDLSR.[I]	Q6IFX2 [241-261]; Q61781 [268-288]
P50446; Q8BGZ7; Q32P04	[R].SLDLDSIIAEVK.[A]	P50446 [316-327]; Q8BGZ7 [314-325]; Q32P04 [326-337]
P08730; P02535	[R].QSVEADINGLRR.[V]	P08730 [194-205]; P02535 [244-255]
Q61781	[R].TMQNLEIELQSQLSMK.[A]	Q61781 [343-358]
Q9Z2L2	[R].VSLDVNHFAPDELTVK.[T]	Q9Z2L2 [20-35]
Q3UA81	[R].EHALLAYTLGVK.[Q]	Q3UA81 [135-146]
Q6IFX2; Q9EQD6; P08730; Q61782; Q61781; Q9QWL7	[K].TRLEQEIATYR.[RSN]	Q6IFX2 [385-395]; Q9EQD6 [404-414]; P08730 [388-398]; Q61782 [28-38]; Q61781 [412-422]; Q9QWL7 [375-385]
Q7TMM9; Q9D6F9; Q9ERD7; P99024; P68372	[-].MREIVHLQAGQCGNQIGAK.[F]	Q7TMM9 [1-19]; Q9D6F9 [1-19]; Q9ERD7 [1-19]; P99024 [1-19]; P68372 [1-19]
Q9D6F9; P68372	[K].FWEVISDEHGIDPTGTYHGDSDLQLER.[I]	Q9D6F9 [20-46]; P68372 [20-46]
Q3TF25	[K].LVRPPVQVYGIEGR.[Y]	Q3TF25 [27-40]
P62830	[R].ISLGLPVGAVINCADNTGAK.[N]	P62830 [16-35]
Q7TMM9; Q9ERD7; P99024	[R].AILVDLEPGTMDSVR.[S]	Q7TMM9 [63-77]; Q9ERD7 [63-77]; P99024 [63-77]
P62830	[K].NLYIISVK.[G]	P62830 [36-43]
Q8C1B2	[K].GVHFMFLAK.[V]	Q8C1B2 [582-590]
Q9D6F9; P99024; P68372	[R].KEAESCDCLQGFQLTHSLGGGTGSGMGTLLISK.[I]	Q9D6F9 [122-154]; P99024 [122-154]; P68372 [122-154]
B7U582; P63017	[K].LLQDFFNGK.[E]	B7U582 [352-360]; P63017 [349-357]
Q9WV02	[R].GFAFVTFESPADAK.[D]	Q9WV02 [50-63]
Q7TMM9; Q9D6F9; Q9ERD7; P99024; P68372	[-].MREIVHLQAGQCGNQIGAK.[F]	Q7TMM9 [1-19]; Q9D6F9 [1-19]; Q9ERD7 [1-19]; P99024 [1-19]; P68372 [1-19]
P08730; P19001	[R].TLQGLEIELQSQLSMK.[A]	P08730 [319-334]; P19001 [305-320]
A0A0A0MQA5	[R].SIQFVDWCPTGFK.[V]	A0A0A0MQA5 [369-381]
B7U582; P63017	[R].IINEPTAAAIAYGLDKK.[VG]	B7U582 [173-189]; P63017 [172-188]
Q3THJ6	[K].FNADEFEDMVAEK.[R]	Q3THJ6 [176-188]
Q3UA81	[R].VETGVLKPGMVVTFAPVNVTTEVK.[S]	Q3UA81 [267-290]
Q3UXQ6	[R].LSNIFVIGK.[G]	Q3UXQ6 [222-230]
P05214; A0A0A0MQA5	[K].AYHEQLSVAEITNACFEPANQMVK.[C]	P05214 [281-304]; A0A0A0MQA5 [310-333]
Q8C1B2	[K].GVHFMFLAK.[V]	Q8C1B2 [582-590]
Q6IFX2; P19001; Q61781; Q9QWL7	[R].RVLDELTLAR.[AT]	Q6IFX2 [202-211]; P19001 [191-200]; Q61781 [229-238]; Q9QWL7 [192-201]
Q9D6F9; P68372	[R].AVLVDLEPGTMDSVR.[S]	Q9D6F9 [63-77]; P68372 [63-77]
Q02257	[R].ALMGSPQLVAAVVR.[T]	Q02257 [178-191]
P20029; B7U582; P63017; B2CSK2	[R].IINEPTAAAIAYGLDK.[RGK]	P20029 [199-214]; B7U582 [173-188]; P63017 [172-187]; B2CSK2 [174-189]
Q3THJ6	[K].VDEFPLCGHMVSDEYEQLSSEALEAAR.[I]	Q3THJ6 [43-69]
Q6IFX2; P19001; Q61781; Q9QWL7	[R].VLDELTLAR.[AT]	Q6IFX2 [203-211]; P19001 [192-200]; Q61781 [230-238]; Q9QWL7 [193-201]
P60710; P68134	[R].AVFPSIVGRPR.[H-]	P60710 [29-39]; P68134 [31-41]
Q8C1B2	[K].HHTVLPYHWQIK.[R]	Q8C1B2 [261-272]
P05214; P68373; A0A0A0MQA5	[R].LDHKFDLMYAK.[RK]	P05214 [391-401]; P68373 [391-401]; A0A0A0MQA5 [420-430]
Q8BFZ3; P60710; P68134	[RK-].SYELPDGQVITIGNER.[F]	Q8BFZ3 [240-255]; P60710 [239-254]; P68134 [241-256]
P19001	[R].LSVEADINGLRR.[V]	P19001 [180-191]
P05214; P68373; A0A0A0MQA5	[R].AVCMLSNTTAIAEAWAR.[L]	P05214 [374-390]; P68373 [374-390]; A0A0A0MQA5 [403-419]
Q9D6F9; P99024; P68372	[K].EAESCDCLQGFQLTHSLGGGTGSGMGTLLISK.[I]	Q9D6F9 [123-154]; P99024 [123-154]; P68372 [123-154]
P50446; Q8BGZ7; Q3UV17; Q32P04	[K].LALDVEIATYR.[K]	P50446 [445-455]; Q8BGZ7 [443-453]; Q3UV17 [460-470]; Q32P04 [455-465]
I6L985	[R].SVSELPIMHQDWLNGKEFK.[C]	I6L985 [324-342]
P05214; P68373; A0A0A0MQA5	[R].QLFHPEQLITGK.[E-]	P05214 [85-96]; P68373 [85-96]; A0A0A0MQA5 [114-125]
P05214; P68373	[K].TIGGGDDSFNTFFSETGAGK.[H]	P05214 [41-60]; P68373 [41-60]
P05214; P68373; A0A0A0MQA5	[R].NLDIERPTYTNLNR.[L]	P05214 [216-229]; P68373 [216-229]; A0A0A0MQA5 [245-258]
P05214; P68373; A0A0A0MQA5	[R].QLFHPEQLITGKEDAANNYAR.[G]	P05214 [85-105]; P68373 [85-105]; A0A0A0MQA5 [114-134]
Q6IFX2	[K].DAEEWFFTK.[T]	Q6IFX2 [280-288]
Q8C1B2	[R].IIYNLFHK.[T]	Q8C1B2 [476-483]
Q8VED5	[R].NLDLDSIIAEVK.[A]	Q8VED5 [304-315]
P60710	[R].VAPEEHPVLLTEAPLNPK.[AR]	P60710 [96-113]
Q7TMM9; Q9D6F9; P99024; P68372	[R].SGPFGQIFRPDNFVFGQSGAGNNWAK.[G]	Q7TMM9 [78-103]; Q9D6F9 [78-103]; P99024 [78-103]; P68372 [78-103]
Q9D6F9; P99024; P68372	[R].YLTVAAVFR.[G]	Q9D6F9 [310-318]; P99024 [310-318]; P68372 [310-318]
Q7TMM9	[R].ALTVPELTQQMFDSK.[N]	Q7TMM9 [283-297]
Q9D6F9; Q9ERD7; P68372; Q922F4	[R].ALTVPELTQQMFDAK.[N]	Q9D6F9 [283-297]; Q9ERD7 [283-297]; P68372 [283-297]; Q922F4 [283-297]
Q3UA81	[R].VETGVLKPGMVVTFAPVNVTTEVK.[S]	Q3UA81 [267-290]
Q9D6F9; P99024; P68372	[R].KEAESCDCLQGFQLTHSLGGGTGSGMGTLLISK.[I]	Q9D6F9 [122-154]; P99024 [122-154]; P68372 [122-154]
I6L985	[K].SNWEAGNTFTCSVLHEGLHNHHTEK.[S]	I6L985 [437-461]
P05214; P68373	[R].TIQFVDWCPTGFK.[V]	P05214 [340-352]; P68373 [340-352]
I6L985	[R].DCGCKPCICTVPEVSSVFIFPPKPK.[D]	I6L985 [246-270]
	[R].LGEHNINVLEGNEQFIDAAK.[I]
B9EJ35	[R].LGEHNINVLEGNEQFVNAAK.[I]	B9EJ35 [73-92]
Q7TMM9; Q9D6F9; Q9ERD7; P99024; P68372	[R].ISEQFTAMFR.[R]	Q7TMM9 [381-390]; Q9D6F9 [381-390]; Q9ERD7 [381-390]; P99024 [381-390]; P68372 [381-390]
P05214	[R].AVFVDLEPTVVDEVR.[T]	P05214 [65-79]
Q7TMM9	[R].YLTVAAIFR.[G]	Q7TMM9 [310-318]
E9Q0F0	[R].SLNNQFASFIDKVR.[F]	E9Q0F0 [111-124]
I6L985	[K].DVLTITLTPK.[V]	I6L985 [271-280]
I6L985	[R].SVSELPIMHQDWLNGK.[E]	I6L985 [324-339]
Q8C1B2	[R].HLFHGTSQDVVDGICK.[H]	Q8C1B2 [529-544]
I6L985	[K].TTPPSVYPLAPGSAAQTNSMVTLGCLVK.[G]	I6L985 [148-175]
Q7TMM9; Q9D6F9; Q9ERD7; P99024; P68372; Q922F4	[K].LAVNMVPFPR.[L]	Q7TMM9 [253-262]; Q9D6F9 [253-262]; Q9ERD7 [253-262]; P99024 [253-262]; P68372 [253-262]; Q922F4 [253-262]
Q7TMM9; Q9D6F9; Q9ERD7; P99024; P68372; Q922F4	[K].NSSYFVEWIPNNVK.[TV]	Q7TMM9 [337-350]; Q9D6F9 [337-350]; Q9ERD7 [337-350]; P99024 [337-350]; P68372 [337-350]; Q922F4 [337-350]
Q546G4	[K].LGEYGFQNAILVR.[Y]	Q546G4 [422-434]
Q7TMM9; Q9ERD7; P99024; P68372; Q922F4	[K].GHYTEGAELVDSVLDVVR.[K]	Q7TMM9 [104-121]; Q9ERD7 [104-121]; P99024 [104-121]; P68372 [104-121]; Q922F4 [104-121]
E9Q0F0	[R].SLNNQFASFIDK.[V]	E9Q0F0 [111-122]

## Sheet: OVCAR4 Peptide Replicate 2
UniProt ID	Peptide Sequence	Positions in Master Proteins
P47963	[K].STESLQANVQR.[L]	P47963 [106-116]
Q8C1B2	[K].KASYSHNFSK.[K]	Q8C1B2 [568-577]
Q8BTM8	[K].VPVHDVTDASK.[V]	Q8BTM8 [1440-1450]
Q3TQX5	[R].VGSTSENITQK.[V]	Q3TQX5 [408-418]
Q5FW97; P21550	[R].AAVPSGASTGIYEALELR.[D]	Q5FW97 [33-50]; P21550 [33-50]
P37040	[K].NPFLAAVTTNR.[K]	P37040 [280-290]
Q80UT7	[K].VPPAINQFTQALDR.[Q]	Q80UT7 [80-93]
Q14AI7	[R].VISFEEQVASIR.[Q]	Q14AI7 [96-107]
P11499	[K].IDIIPNPQER.[T]	P11499 [73-82]
Q3TW51	[K].DTNGENIAESLVAEGLATR.[R]	Q3TW51 [117-135]
Q542I9	[R].VAEEHAPSIVFIDEIDAIGTK.[R]	Q542I9 [273-293]
Q7TMM9; Q9ERD7; P99024; P68372; Q922F4	[K].GHYTEGAELVDSVLDVVR.[K]	Q7TMM9 [104-121]; Q9ERD7 [104-121]; P99024 [104-121]; P68372 [104-121]; Q922F4 [104-121]
Q3UJZ7	[R].LSFYETGEIPR.[K]	Q3UJZ7 [405-415]
Q60598	[R].YGLFPANYVELR.[Q]	Q60598 [534-545]
F8WHL2	[R].GITGVDLFGTTDAVVK.[H]	F8WHL2 [183-198]
Q7TPR4	[K].LLETIDQLYLEYAK.[R]	Q7TPR4 [503-516]
Q3UK83	[K].IEVIEIMTDR.[G]	Q3UK83 [131-140]
Q91VW3	[R].IQYQLVDISQDNALR.[D]	Q91VW3 [33-47]
P52480	[R].GDLGIEIPAEK.[V]	P52480 [295-305]
Q8BKC5	[K].FVPYYDLFMPSLK.[H]	Q8BKC5 [527-539]
B2RSV4	[K].LGAVFNQVAFPLQYTPR.[K]	B2RSV4 [770-786]
Q6PE01	[R].FVYVWDTTSR.[R]	Q6PE01 [309-318]
Q642L7	[K].TITLEVEPSDTIENVK.[A]	Q642L7 [12-27]
B2CY77	[R].AIVAIENPADVSVISSR.[N]	B2CY77 [64-80]
Q3U6P5	[R].MIAGQVLDINLAAEPK.[V]	Q3U6P5 [74-89]
Q3TPZ5	[K].VSALDLAVLDQVEAR.[L]	Q3TPZ5 [269-283]
Q9QXS1	[K].LQNVQIALDYLR.[H]	Q9QXS1 [248-259]
F8WHQ1	[K].VEEEIQTLSQVLAAK.[E]	F8WHQ1 [85-99]
Q564E8	[R].NIPGITLLNVSK.[L]	Q564E8 [223-234]
Q9CY58	[K].SAAQAAAQTNSNAAGK.[Q]	Q9CY58 [53-68]
Q91YC8	[R].ETDDTLVLSFVGQTR.[V]	Q91YC8 [420-434]
Q9ERD7	[K].MSSTFIGNSTAIQELFK.[R]	Q9ERD7 [363-379]
A2A5Y6	[R].SGYSSPGSPGTPGSR.[S]	A2A5Y6 [503-517]
O70569	[K].TPGPGAQSALR.[A]	O70569 [107-117]
P14152	[K].FVEGLPINDFSR.[E]	P14152 [299-310]
Q3TED1	[R].FVIGGPQGDAGLTGR.[K]	Q3TED1 [250-264]
P37040	[R].NIIVFYGSQTGTAEEFANR.[L]	P37040 [79-97]
Q3U6P5	[R].VFIGNLNTLVVK.[K]	Q3U6P5 [18-29]
Q3TWH2	[K].ILIVGGGVAGLASAGAAK.[S]	Q3TWH2 [230-247]
Q9CVB6	[-].MILLEVNNR.[I]	Q9CVB6 [1-9]
G3X956	[K].APGEQTVPALNLQNAFR.[I]	G3X956 [607-623]
B9EHN0	[R].LAGTQPLEVLEAVQR.[S]	B9EHN0 [679-693]
Q61699	[K].VLGTAFDPFLGGK.[N]	Q61699 [222-234]
Q7TMM9; Q9D6F9; Q9ERD7; P99024; P68372; Q922F4	[K].NSSYFVEWIPNNVK.[TV]	Q7TMM9 [337-350]; Q9D6F9 [337-350]; Q9ERD7 [337-350]; P99024 [337-350]; P68372 [337-350]; Q922F4 [337-350]
Q5NBZ3	[K].IIENELEGFGIR.[L]	Q5NBZ3 [160-171]
P16125	[K].GEMMDLQHGSLFLQTPK.[I]	P16125 [61-77]
P62137	[RK].YPENFFLLR.[G]	P62137 [114-122]
E9PZF0	[R-].TFIAIKPDGVQR.[G]	E9PZF0 [7-18]; [122-133]
Q8BH64	[R].LFELEEQDLFR.[D]	Q8BH64 [270-280]
P97825	[R].VLRPPGGGSNFSLGFDEPAEQPVR.[K]	P97825 [20-43]
Q3TQX5	[R].ELAVQIYEEAR.[K]	Q3TQX5 [277-287]
Q9CQF3	[K].LFLVQLQEK.[A]	Q9CQF3 [174-182]
Q3TIV3; P11103	[R].TTNFAGILSQGLR.[I]	Q3TIV3 [866-878]; P11103 [865-877]
Q8BGB7	[K].AEFFADVVPAVR.[R]	Q8BGB7 [126-137]
P50247	[K].VPAINVNDSVTK.[S]	P50247 [175-186]
P09405	[K].FGYVDFESAEDLEK.[A]	P09405 [351-364]
Q9WV02	[K].LFIGGLNTETNEK.[A]	Q9WV02 [10-22]
A0A0N4SVP8	[R].ETQALILAPTR.[E]	A0A0N4SVP8 [106-116]
Q80TM2	[R].DPVQLNLLYVQAR.[D]	Q80TM2 [231-243]
P62852	[R].DKLNNLVLFDK.[A]	P62852 [42-52]
P05214; P68373; A0A0A0MQA5	[R].AFVHWYVGEGMEEGEFSEAR.[E]	P05214 [403-422]; P68373 [403-422]; A0A0A0MQA5 [432-451]
Q9JIF7	[K].YEAAGTLVTLSSAPTAIK.[A]	Q9JIF7 [262-279]
P11679	[R].LEGLTDEINFLR.[Q]	P11679 [220-231]
Q9CPX6	[K].ALEVAEYLTPVLK.[E]	Q9CPX6 [12-24]
Q3TGE1	[R].FMEQVIFK.[Y]	Q3TGE1 [92-99]
Q4FJZ3	[R].QEIVSLFNAFGR.[I]	Q4FJZ3 [434-445]
Q5SS40	[K].VAGMDVELTVEER.[N]	Q5SS40 [30-42]
P67778	[K].AAELIANSLATAGDGLIELR.[K]	P67778 [220-239]
P70168	[K].LAATNALLNSLEFTK.[A]	P70168 [192-206]
Q9CWK0	[K].LVAIVDVIDQNR.[A]	Q9CWK0 [24-35]
Q00612	[R].GGYFDEFGIIR.[D]	Q00612 [247-257]
O70591	[K].GAVSAEQVIAGFNR.[L]	O70591 [19-32]
P09405	[K].GFGFVDFNSEEDAK.[A]	P09405 [608-621]
Q8BTM8	[K].FNEEHIPDSPFVVPVASPSGDAR.[R]	Q8BTM8 [2311-2333]
D3Z7Q5	[R].NSILAQVLDQSAR.[A]	D3Z7Q5 [120-132]
P05214; P68373; A0A0A0MQA5	[K].VGINYQPPTVVPGGDLAK.[V]	P05214 [353-370]; P68373 [353-370]; A0A0A0MQA5 [382-399]
Q3V235	[K].DLQMVNISLR.[V]	Q3V235 [98-107]
Q8R1B5	[K].NETDESQIQLAGGDVELPR.[E]	Q8R1B5 [85-103]
Q3TEU8	[R].AIFLADGNVFTTGFSR.[M]	Q3TEU8 [224-239]
Q6P4T2	[K].VVLLTGETSTDLK.[L]	Q6P4T2 [1405-1417]
P05214; P68373; A0A0A0MQA5	[K].EDAANNYAR.[G]	P05214 [97-105]; P68373 [97-105]; A0A0A0MQA5 [126-134]
P36536	[K].LVFLGLDNAGK.[T]	P36536 [28-38]
Q9JMA1	[R].LPAYLTIQMVR.[F]	Q9JMA1 [320-330]
Q9D0E1	[K].VGEVTYVELLMDAEGK.[S]	Q9D0E1 [94-109]
Q9D6F9	[K].MAATFIGNSTAIQELFK.[R]	Q9D6F9 [363-379]
Q9DCL9	[K].EIVLADVIDNDSWR.[L]	Q9DCL9 [202-215]
Q542I9	[R].TMLELLNQLDGFDSR.[G]	Q542I9 [308-322]
A2A7S7	[R].TVVSGLVQFVPK.[E]	A2A7S7 [437-448]
Q3TN31	[K].ALLEVVQSGGK.[N]	Q3TN31 [194-204]
P17879	[K].AQIHDLVLVGGSTR.[I]	P17879 [329-342]
P05214; P68373; A0A0A0MQA5	[K].FDLMYAK.[RK]	P05214 [395-401]; P68373 [395-401]; A0A0A0MQA5 [424-430]
Q6ZWQ6	[K].VDLVDENFTELR.[G]	Q6ZWQ6 [29-40]
P11679	[R].ASLEAAIADAEQR.[G]	P11679 [335-347]
Q571M2; P48722	[R].LMNETTAVALAYGIYK.[Q]	Q571M2 [258-273]; P48722 [170-185]
Q3TDF8	[R].LSVLGAITSVQQR.[L]	Q3TDF8 [69-81]
Q7TMK9	[K].LDEIYVAGLVAHSDLDER.[A]	Q7TMK9 [43-60]
Q3TN31	[RK].LTVEDPVTVEYITR.[YF]	Q3TN31 [96-109]
Q3TL71	[R].LLIHQSLAGGIIGVK.[G]	Q3TL71 [149-163]
P61222	[K].ADIFMFDEPSSYLDVK.[Q]	P61222 [235-250]
Q64511	[K].IFDEILVNAADNK.[Q]	Q64511 [93-105]
Q3TFF0	[K].EISFAYEVLSNPEK.[R]	Q3TFF0 [49-62]
Q9EPL8	[R].FIQLLSDQSDQSVLIQK.[Q]	Q9EPL8 [185-201]
P21550	[K].VVIGMDVAASEFYR.[N]	P21550 [240-253]
O88569	[K].LFIGGLSFETTEESLR.[N]	O88569 [23-38]
P68373	[R].AVFVDLEPTVIDEVR.[TA]	P68373 [65-79]
Q3UCF0	[K].LLDEVFFSEK.[I]	Q3UCF0 [55-64]
P60710	[K].DLYANTVLSGGTTMYPGLADR.[M]	P60710 [292-312]
Q9D051	[K].VFLLGEEVAQYDGAYK.[V]	Q9D051 [53-68]
Q3UA81	[K].THINIVVIGHVDSGK.[S]	Q3UA81 [6-20]
P07356	[K].DIISDTSGDFR.[K]	P07356 [158-168]
Q3TXF9	[R].AVFQANQENLPILK.[R]	Q3TXF9 [431-444]
Q8BU30	[K].YIIEELNVR.[K]	Q8BU30 [869-877]
Q3UDE2	[K].YIESPVLFLR.[E]	Q3UDE2 [447-456]
Q3UIG0	[R].YLTTAVITNK.[D]	Q3UIG0 [256-265]
Q5FW97	[R].IGAEVYHNLK.[N]	Q5FW97 [184-193]
Q9EPL8	[K].EYNEFAEVFLK.[A]	Q9EPL8 [284-294]
Q6ZQ38	[R].AVAALLTIPEAEK.[S]	Q6ZQ38 [1179-1191]
Q3TDF8	[K].VNVAGLVLAGSADFK.[T]	Q3TDF8 [219-233]
E9Q0F0	[R].SLNNQFASFIDK.[V]	E9Q0F0 [111-122]
Q9D0E1	[K].EVFSMAGVVVR.[A]	Q9D0E1 [221-231]
P60843	[K].GYDVIAQAQSGTGK.[T]	P60843 [69-82]
Q60932	[K].LTFDSSFSPNTGK.[K]	Q60932 [110-122]
P08249	[K].AGAGSATLSMAYAGAR.[F]	P08249 [242-257]
P47757	[R].STLNEIYFGK.[T]	P47757 [226-235]
Q9D0R2	[R].GFQEVVTPNIFNSR.[L]	Q9D0R2 [367-380]
Q921L4	[K].AMGIMNSFVNDIFER.[I]	Q921L4 [59-73]
P62315	[R].EPVQLETLSIR.[G]	P62315 [51-61]
Q3ULC7	[R].IGVPSATEIIK.[A]	Q3ULC7 [635-645]
Q9D903	[R].QAQAAVLAVLPR.[L]	Q9D903 [111-122]
Q9DCT2	[R].VVAEPVELAQEFR.[K]	Q9DCT2 [218-230]
P08249	[K].VDFPQDQLATLTGR.[I]	P08249 [216-229]
Q9QXX4	[K].LAVATFAGIENK.[F]	Q9QXX4 [643-654]
Q3U536	[K].VDNDENEHQLSLR.[T]	Q3U536 [33-45]
P51150	[K].EAINVEQAFQTIAR.[N]	P51150 [158-171]
Q3TGR2	[R].TPCTVSCNIPVVSGK.[E]	Q3TGR2 [215-229]
P12815	[K].AGVNFSEFTGVWK.[Y]	P12815 [78-90]
	[R].AVMVDLEPTVVDEVR.[A]
P05214	[R].AVFVDLEPTVVDEVR.[T]	P05214 [65-79]
Q9JHU4	[K].IQGLTVEQAEAVVR.[L]	Q9JHU4 [3922-3935]
Q3V244	[K].EALTYDGALLGDR.[S]	Q3V244 [97-109]
Q3UGB5	[K].LFVGGLDWSTTQETLR.[S]	Q3UGB5 [12-27]
Q3UXI9	[K].ILITTVPPNLR.[K]	Q3UXI9 [175-185]
Q3UIF3	[R].NPDDITNEEYGEFYK.[S]	Q3UIF3 [301-315]
G3UZA7	[K].VAGQDGSVVQFK.[I]	G3UZA7 [24-35]
P27773	[K].GFPTIYFSPANK.[K]	P27773 [449-460]
Q3UHW5	[K].ANINVENAFFTLAR.[D]	Q3UHW5 [154-167]
Q3U536	[K].DELHIVEAEAMNYEGSPIK.[V]	Q3U536 [55-73]
P19096	[K].GVDLVLNSLAEEK.[L]	P19096 [1733-1745]
P63037	[R].TIVITSHPGQIVK.[H]	P63037 [284-296]
Q99K87	[R].LIIAGTSAYAR.[L]	Q99K87 [220-230]
P60824	[R].GFGFVTFENIDDAK.[D]	P60824 [48-61]
P20029	[R].NELESYAYSLK.[N]	P20029 [564-574]
P20152	[R].LGDLYEEEMR.[E]	P20152 [146-155]
P70168	[R].VLANPGNSQVAR.[V]	P70168 [43-54]
P38647	[R].QAASSLQQASLK.[L]	P38647 [635-646]
P29341	[R].SLGYAYVNFQQPADAER.[A]	P29341 [51-67]
Q3TED1	[K].TGMILLAGEITSR.[A]	Q3TED1 [62-74]
Q9JHU4	[R].FQSISTEFLALMK.[K]	Q9JHU4 [1566-1578]
Q9QXS1	[K].VLALPEPSPAAPTLR.[S]	Q9QXS1 [1195-1209]
P60710; P68134	[RK-].SYELPDGQVITIGNER.[F]	P60710 [239-254]; P68134 [241-256]
Q6ZQ38	[K].ITSEALLVTQQLVK.[V]	Q6ZQ38 [535-548]
Q7TMM9; Q9D6F9; P99024; P68372	[R].LHFFMPGFAPLTSR.[G]	Q7TMM9 [263-276]; Q9D6F9 [263-276]; P99024 [263-276]; P68372 [263-276]
Q03958	[K].EELALLDGSNVVFK.[L]	Q03958 [45-58]
P17879	[K].LLQDFFNGR.[D]	P17879 [349-357]
Q9WTP6	[K].LVSDEMVVELIEK.[N]	Q9WTP6 [73-85]
P40142	[K].ILATPPQEDAPSVDIANIR.[M]	P40142 [284-302]
Q5DTI2	[R].VDQSILTGESVSVIK.[H]	Q5DTI2 [192-206]
O08807	[R].LVQAFQYTDK.[H]	O08807 [234-243]
P99024	[R].ALTVPELTQQVFDAK.[N]	P99024 [283-297]
P56480	[K].IGLFGGAGVGK.[T]	P56480 [202-212]
P38647	[R].QAVTNPNNTFYATK.[R]	P38647 [108-121]
Q9D0I9	[R].LNDYIFSFDK.[M]	Q9D0I9 [513-522]
Q921L4	[K].AMGIMNSFVNDIFER.[I]	Q921L4 [59-73]
Q3U8X1	[R].VIGLSSDLQQVGGASAR.[I]	Q3U8X1 [266-282]
P38647	[R].EQQIVIQSSGGLSK.[D]	P38647 [542-555]
P62301	[R].LILIESR.[I]	P62301 [115-121]
P05214; P68373; A0A0A0MQA5	[R].IHFPLATYAPVISAEK.[A]	P05214 [265-280]; P68373 [265-280]; A0A0A0MQA5 [294-309]
P14824	[K].DAFVAIVQSVK.[N]	P14824 [588-598]
P60843	[K].LNSNTQVVLLSATMPSDVLEVTK.[K]	P60843 [203-225]
P20152	[K].MALDIEIATYR.[K]	P20152 [391-401]
P48722	[K].VLATTFDPYLGGR.[N]	P48722 [222-234]
Q3V235	[K].LLLGAGAVAYGVR.[E]	Q3V235 [25-37]
Q3TK29	[R].AQLLQPTLEINPR.[H]	Q3TK29 [637-649]
E9QNN1	[K].AIEPPPLDAVIEAEHTLR.[E]	E9QNN1 [823-840]
Q3B807	[K].QIFEQFVK.[T]	Q3B807 [499-506]
P63017	[K].SFYPEEVSSMVLTK.[M]	P63017 [113-126]
Q3UWT6	[K].LAQQYYLVYQEPIPTAQLVQR.[V]	Q3UWT6 [93-113]
Q7TMM9; Q9ERD7; P99024; P68372; Q922F4	[K].GHYTEGAELVDSVLDVVR.[K]	Q7TMM9 [104-121]; Q9ERD7 [104-121]; P99024 [104-121]; P68372 [104-121]; Q922F4 [104-121]
P05214; P68373; A0A0A0MQA5	[R].AVCMLSNTTAIAEAWAR.[L]	P05214 [374-390]; P68373 [374-390]; A0A0A0MQA5 [403-419]
Q80X68	[K].GLVYETSVLDPDEGIR.[F]	Q80X68 [77-92]
Q3UW40	[R].QINWTVLYR.[R]	Q3UW40 [48-56]
Q60932	[K].VNNSSLIGLGYTQTLKPGIK.[L]	Q60932 [250-269]
P70349	[K].IIFEDDR.[C]	P70349 [31-37]
P11499	[R].APFDLFENK.[K]	P11499 [339-347]
P99024	[R].ALTVPELTQQVFDAK.[N]	P99024 [283-297]
P11983	[R].EQLAIAEFAR.[S]	P11983 [434-443]
P53026	[R].DTLYEAVR.[E]	P53026 [8-15]
Q9DCY1	[K].DFMIQGGDFTR.[G]	Q9DCY1 [99-109]
B2CY77	[K].FAAATGATPIAGR.[F]	B2CY77 [90-102]
H7BX95	[R].DGTGVVEFVR.[K]	H7BX95 [155-164]
A0A0A0MQA5	[K].DVNAAIAAIK.[T]	A0A0A0MQA5 [356-365]
Q8C1B2	[R].HLFHGTSQDVVDGICK.[H]	Q8C1B2 [529-544]
Q3TIP8	[K].GVTFNVTTVDTK.[R]	Q3TIP8 [38-49]
Q542X7	[K].LIEEVMIGEDK.[L]	Q542X7 [348-358]
P20029	[K].TFAPEEISAMVLTK.[M]	P20029 [140-153]
Q20BD0	[K].IFVGGLNPEATEEK.[I]	Q20BD0 [161-174]
Q9QUM9	[K].AINQGGLTSVAVR.[G]	Q9QUM9 [31-43]
A3KGU9	[R].ELPTAFDYVEFTR.[S]	A3KGU9 [2481-2493]
P63017	[K].NSLESYAFNMK.[A]	P63017 [540-550]
Q3UER8	[R].DNCCILDER.[F]	Q3UER8 [31-39]
P62715	[K].YSFLQFDPAPR.[R]	P62715 [284-294]
Q571M2	[K].VLATAFDTTLGGR.[K]	Q571M2 [310-322]
Q60930	[K].LTFDTTFSPNTGK.[K]	Q60930 [109-121]
Q6A0F1	[R].LVPGGGATEIELAK.[Q]	Q6A0F1 [415-428]
Q3THE2	[K].GNFNYIEFTR.[I]	Q3THE2 [152-161]
Q6ZPS9	[K].FYNELTEILVR.[F]	Q6ZPS9 [716-726]
P38647	[K].LYSPSQIGAFVLMK.[M]	P38647 [160-173]
Q9DCY1	[K].TVDNFVALATGEK.[G]	Q9DCY1 [72-84]
Q8C2Q7	[R].YVELFLNSTAGASGGAYEHR.[Y]	Q8C2Q7 [356-375]
P09411	[K].VNEMIIGGGMAFTFLK.[V]	P09411 [231-246]
Q3UCL7	[R].FGFPEGSVELYAEK.[V]	Q3UCL7 [77-90]
Q5M9M4	[K].IVVNLTGR.[L]	Q5M9M4 [61-68]
Q80ZM5	[K].YSQLVVETIR.[K]	Q80ZM5 [47-56]
Q9D6R2	[K].TPYTDVNIVTIR.[E]	Q9D6R2 [135-146]
P07356	[R].RAEDGSVIDYELIDQDAR.[E-]	P07356 [179-196]
Q3V0Z8	[K].LLQLVEDR.[G]	Q3V0Z8 [546-553]
Q3UDJ7; Q7TPR4	[R].TINEVENQILTR.[D]	Q3UDJ7 [747-758]; Q7TPR4 [727-738]
Q8VH51	[R].DLEEFFSTVGK.[V-]	Q8VH51 [168-178]
P51881	[K].EQGVLSFWR.[G]	P51881 [64-72]
P56480	[K].TVLIMELINNVAK.[A]	P56480 [213-225]
P56480	[R].LVLEVAQHLGESTVR.[T]	P56480 [95-109]
S4R232	[R].GAAGALLVYDITR.[RA]	S4R232 [80-92]
Q3V235	[R].IGGVQQDTILAEGLHFR.[I]	Q3V235 [55-71]
Q8BTM8	[K].SPFEVYVDK.[S]	Q8BTM8 [368-376]
Q7TMM9; Q9D6F9; Q9ERD7; P99024; P68372; Q922F4	[K].NSSYFVEWIPNNVK.[TV]	Q7TMM9 [337-350]; Q9D6F9 [337-350]; Q9ERD7 [337-350]; P99024 [337-350]; P68372 [337-350]; Q922F4 [337-350]
Q3TVM1	[K].VQAQVIQETIVPK.[E]	Q3TVM1 [132-144]
P20152	[R].KVESLQEEIAFLK.[K]	P20152 [223-235]
Q9JJI8	[K].IEEIKDFLLTAR.[R]	Q9JJI8 [5-16]
F6YVP7	[K].IAFAITAIK.[G]	F6YVP7 [26-34]
P60710; P68134	[R].DLTDYLMK.[I]	P60710 [184-191]; P68134 [186-193]
P40142	[K].AVELAANTK.[G]	P40142 [457-465]
P20152	[K].ILLAELEQLK.[G]	P20152 [130-139]
P09103	[K].THILLFLPK.[S]	P09103 [257-265]
Q3TQX5	[K].QYPISLVLAPTR.[E]	Q3TQX5 [265-276]
P05214; P68373; A0A0A0MQA5	[R].QLFHPEQLITGKEDAANNYAR.[G]	P05214 [85-105]; P68373 [85-105]; A0A0A0MQA5 [114-134]
P60843	[K].ATQALVLAPTR.[E]	P60843 [100-110]
P63038	[R].GYISPYFINTSK.[G]	P63038 [222-233]
P20029	[R].ITPSYVAFTPEGER.[L]	P20029 [62-75]
P60843	[K].LQMEAPHIIVGTPGR.[V]	P60843 [147-161]
P50247	[K].VAVVAGYGDVGK.[G]	P50247 [215-226]
P99027	[R].YVASYLLAALGGNSSPSAK.[D]	P99027 [3-21]
Q3V117	[R].TIAIIAEGIPEALTR.[K]	Q3V117 [593-607]
P09411	[K].ITLPVDFVTADK.[F]	P09411 [280-291]
Q7TMK9	[R].TGYTLDVTTGQR.[K]	Q7TMK9 [131-142]
D3YX79	[R].LFQVEYAIEAIK.[L]	D3YX79 [21-32]
Q3UA81	[R].VETGVLKPGMVVTFAPVNVTTEVK.[S]	Q3UA81 [267-290]
Q9JJI8	[R].YLYTLVITDK.[E]	Q9JJI8 [41-50]
P05784	[R].QAQEYEALLNIK.[V]	P05784 [352-363]
Q545B6	[R].ASGQAFELILSPR.[S]	Q545B6 [15-27]
Q3TW51	[R].SEAVVEYVFSGSR.[L]	Q3TW51 [527-539]
Q80UT7	[R].AGVNTVTTLVENK.[K]	Q80UT7 [142-154]
Q7TMM9; Q9ERD7; P99024; P68372; Q922F4	[K].GHYTEGAELVDSVLDVVRK.[E]	Q7TMM9 [104-122]; Q9ERD7 [104-122]; P99024 [104-122]; P68372 [104-122]; Q922F4 [104-122]
P11499	[K].EQVANSAFVER.[V]	P11499 [492-502]
Q9D8N0	[K].LDPGSEETQTLVR.[E]	Q9D8N0 [402-414]
Q3TJ43	[K].IPVDTYNNILTVLK.[L]	Q3TJ43 [404-417]
Q9D8N0	[K].STFVLDEFK.[R]	Q9D8N0 [286-294]
P97807	[R].IYELAAGGTAVGTGLNTR.[I]	P97807 [266-283]
P29341; Q62029	[R].ALDTMNFDVIK.[G]	P29341 [68-78]; Q62029 [68-78]
Q7TMM9; Q9D6F9; P99024; P68372	[R].SGPFGQIFRPDNFVFGQSGAGNNWAK.[G]	Q7TMM9 [78-103]; Q9D6F9 [78-103]; P99024 [78-103]; P68372 [78-103]
P80313	[K].ALEIIPR.[Q]	P80313 [441-447]
D3YTQ3	[K].VFVGGLSPDTSEEQIK.[E]	D3YTQ3 [235-250]
Q80U89	[K].YIEIYVQK.[V]	Q80U89 [809-816]
P59999	[K].ELLLQPVTISR.[N]	P59999 [45-55]
Q9WV02	[R].IVEVLLMK.[D]	Q9WV02 [34-41]
Q60668	[K].IFVGGLSPDTPEEK.[I]	Q60668 [184-197]
Q571M2	[K].EDIYAVEIVGGATR.[I]	Q571M2 [421-434]
P17879	[R].IINEPTAAAIAYGLDR.[T]	P17879 [172-187]
Q497E9	[K].ISSLLEEQFQQGK.[L]	Q497E9 [158-170]
Q62318	[K].ADVQSIIGLQR.[F]	Q62318 [780-790]
P68040	[K].DVLSVAFSSDNR.[Q]	P68040 [107-118]
Q99K87	[RK].ISATSIFFESMPYK.[LV]	Q99K87 [183-196]
A2A5Y6	[K].HVPGGGSVQIVYKPVDLSK.[V]	A2A5Y6 [607-625]
P63242	[K].IVEMSTSK.[T]	P63242 [40-47]
Q3TFE5	[R].VESLLVTAISK.[A]	Q3TFE5 [453-463]
P20029	[K].ELEEIVQPIISK.[L]	P20029 [623-634]
P60710	[K].YPIEHGIVTNWDDMEK.[I]	P60710 [69-84]
Q5M9M5	[R].LAPDYDALDVANK.[I]	Q5M9M5 [140-152]
P08249	[R].ANTFVAELK.[G]	P08249 [177-185]
Q8CIG8	[K].AAILPTSIFLTNK.[K]	Q8CIG8 [228-240]
Q8BTM8	[K].VTVLFAGQHIAK.[S]	Q8BTM8 [356-367]
P05214; A0A0A0MQA5	[K].AYHEQLSVAEITNACFEPANQMVK.[C]	P05214 [281-304]; A0A0A0MQA5 [310-333]
P62827	[K].NLQYYDISAK.[S]	P62827 [143-152]
P43276	[K].ATGPPVSELITK.[A]	P43276 [35-46]
Q03265	[K].TSIAIDTIINQK.[R]	Q03265 [219-230]
Q9R0H5; P04104	[R].FLEQQNQVLQTK.[W]	Q9R0H5 [151-162]; P04104 [208-219]
Q5FW97	[R].GNPTVEVDLYTAK.[G]	Q5FW97 [16-28]
Q3TVV6	[R].GYFEYIEENK.[Y]	Q3TVV6 [232-241]
Q8C196	[K].IALGIPLPEIK.[N]	Q8C196 [741-751]
F6YVP7	[R].VITIMQNPR.[Q]	F6YVP7 [67-75]
Q9D0R2	[R].MIAILTENYGGK.[W]	Q9D0R2 [599-610]
P08249	[K].IFGVTTLDIVR.[A]	P08249 [166-176]
Q7TMM9; Q9D6F9; Q9ERD7; P99024; P68372; Q922F4	[K].LAVNMVPFPR.[L]	Q7TMM9 [253-262]; Q9D6F9 [253-262]; Q9ERD7 [253-262]; P99024 [253-262]; P68372 [253-262]; Q922F4 [253-262]
Q921L4	[K].QVHPDTGISSK.[A]	Q921L4 [48-58]
Q3UCL7	[K].AELNEFLTR.[E]	Q3UCL7 [19-27]
P14115	[K].LWTLVSEQTR.[V]	P14115 [78-87]
P09411	[K].ALESPERPFLAILGGAK.[V]	P09411 [200-216]
A0A023T672	[K].GYTLVEYETYK.[E]	A0A023T672 [115-125]
P67778	[R].VLPSITTEILK.[S]	P67778 [118-128]
Q8BTM8	[R].LYSVSYLLK.[D]	Q8BTM8 [2613-2621]
P29341; A2A5N3	[R].YQGVNLYVK.[N]	P29341 [291-299]; A2A5N3 [291-299]
P48678	[R].IDSLSAQLSQLQK.[Q]	P48678 [299-311]
Q80U89	[K].LHIIEVGTPPTGNQPFPK.[K]	Q80U89 [238-255]
P58252	[R].GHVFEESQVAGTPMFVVK.[A]	P58252 [768-785]
Q3UXI9	[K].ILPTLEAVAALGNK.[V]	Q3UXI9 [128-141]
Q3UZH3	[K].YVVVTGITPTPLGEGK.[S]	Q3UZH3 [373-388]
Q3U4U6	[R].IVLLDSSLEYK.[K]	Q3U4U6 [238-248]
Q9ERK4	[R].LLQAFLER.[G]	Q9ERK4 [707-714]
Q3TN31	[K].DIVVLGVEK.[K]	Q3TN31 [39-47]
P63038	[K].VGGTSDVEVNEK.[K]	P63038 [406-417]
G3X956	[K].EELEFEVPFR.[D]	G3X956 [793-802]
Q9CZI5	[K].VANVSLLALYK.[G]	Q9CZI5 [125-135]
Q7TMM9; Q9D6F9; Q9ERD7; P99024; P68372; Q922F4	[R].FPGQLNADLR.[K]	Q7TMM9 [242-251]; Q9D6F9 [242-251]; Q9ERD7 [242-251]; P99024 [242-251]; P68372 [242-251]; Q922F4 [242-251]
Q5BLK1	[K].DIPGLTDTTVPR.[R]	Q5BLK1 [120-131]
J3QMG3; Q60932	[K].LTLSALIDGK.[N]	J3QMG3 [258-267]; Q60932 [270-279]
E9PUX4	[K].FVIATSTK.[V]	E9PUX4 [201-208]
P80315	[R].ALIAGGGAPEIELALR.[L]	P80315 [420-435]
F6VW30; O70456; Q9CQV8	[R].VLSSIEQK.[TS]	F6VW30 [119-126]; O70456 [61-68]; Q9CQV8 [63-70]
P63038	[K].TLNDELEIIEGMK.[F]	P63038 [206-218]
A6ZI44	[K].IGEHTPSALAIMENANVLAR.[Y]	A6ZI44 [208-227]
Q3TIV3; P11103	[K].VFSATLGLVDIVK.[G]	Q3TIV3 [552-564]; P11103 [551-563]
P20029	[K].DAGTIAGLNVMR.[I]	P20029 [187-198]
Q3V0Z8	[R].TTYLVLDEADR.[M]	Q3V0Z8 [317-327]
Q3THH1	[K].LAAVDATVNQVLASR.[Y]	Q3THH1 [222-236]
P53026	[K].YDAFLASESLIK.[Q]	P53026 [107-118]
P27659	[R].LEQQVPVNQVFGQDEMIDVIGVTK.[DG]	P27659 [201-224]
P38647	[K].NAVITVPAYFNDSQR.[Q]	P38647 [188-202]
Q922Q8	[R].LVTLPVSFAQLK.[N]	Q922Q8 [97-108]
Q9EPL8	[K].AFAVGVQQVLLK.[V]	Q9EPL8 [295-306]
Q642L7	[K].ESTLHLVLR.[LV]	Q642L7 [64-72]
Q60932	[R].VTQSNFAVGYK.[T]	Q60932 [177-187]
P02301	[R].EIAQDFK.[T]	P02301 [74-80]
Q497E9	[R].IIDVVYNASNNELVR.[T]	Q497E9 [78-92]
E9Q5A0	[K].YQAVTATLEEK.[R]	E9Q5A0 [369-379]
Q3TL71	[K].IILDLISESPIK.[G]	Q3TL71 [208-219]
Q7TMM9; Q9ERD7; P99024	[R].AILVDLEPGTMDSVR.[S]	Q7TMM9 [63-77]; Q9ERD7 [63-77]; P99024 [63-77]
Q9WVA4	[R].TLMNLGGLAVAR.[D]	Q9WVA4 [128-139]
Q3UAD6	[K].FAFQAEVNR.[M]	Q3UAD6 [76-84]
Q8BTM8	[R].IANLQTDLSDGLR.[L]	Q8BTM8 [64-76]
Q7TMM9; Q9ERD7; P99024	[R].AILVDLEPGTMDSVR.[S]	Q7TMM9 [63-77]; Q9ERD7 [63-77]; P99024 [63-77]
Q3TL71	[R].VVLIGGKPDR.[VL]	Q3TL71 [192-201]
P99024	[K].MAVTFIGNSTAIQELFK.[R]	P99024 [363-379]
Q64433	[K].VVLDDKDYFLFR.[D]	Q64433 [81-92]
Q3UPA3	[K].YIAIVSTTVETK.[E]	Q3UPA3 [416-427]
Q03265	[R].TGAIVDVPVGEELLGR.[V]	Q03265 [134-149]
P80315	[K].VIDPATATSVDLR.[D]	P80315 [194-206]
Q9Z1N5	[K].GLAITFVSDENDAK.[I]	Q9Z1N5 [385-398]
P61089	[K].LELFLPEEYPMAAPK.[V]	P61089 [54-68]
A2A5Y6	[K].IGSLDNITHVPGGGNK.[K]	A2A5Y6 [662-677]
Q3UW40	[K].VFQFLNAK.[C]	Q3UW40 [28-35]
P20029	[K].VTHAVVTVPAYFNDAQR.[Q]	P20029 [166-182]
P84078	[K].NISFTVWDVGGQDK.[I]	P84078 [60-73]
P63038	[R].VTDALNATR.[A]	P63038 [421-429]
Q3UJL7	[R].YQDILVFR.[S]	Q3UJL7 [48-55]
Q149Z9	[R].SGVSLAALK.[K]	Q149Z9 [56-64]
A0A0A0MQA5	[R].AVFVDLEPTVIDEIR.[N]	A0A0A0MQA5 [94-108]
P52480	[R].FDEILEASDGIMVAR.[G]	P52480 [280-294]
P62852	[K].LNNLVLFDK.[A]	P62852 [44-52]
Q3TCP5	[K].IAQDLEMYGINYFEIK.[N]	Q3TCP5 [194-209]
Q3UDJ7	[K].LVSIGAEEIVDGNAK.[M]	Q3UDJ7 [127-141]
Q9D8N0	[K].STFVLDEFKR.[K]	Q9D8N0 [286-295]
P54728	[R].AVEYLLMGIPGDR.[E]	P54728 [221-233]
P60710; P68134	[RK-].SYELPDGQVITIGNER.[F]	P60710 [239-254]; P68134 [241-256]
P52480	[K].ITLDNAYMEK.[C]	P52480 [142-151]
D3Z2H9	[R].IQLVEEELDR.[A]	D3Z2H9 [56-65]
P38647	[K].STNGDTFLGGEDFDQALLR.[H]	P38647 [266-284]
P63101	[K].GIVDQSQQAYQEAFEISK.[K]	P63101 [140-157]
P14211	[K].VHVIFNYK.[G]	P14211 [144-151]
Q3TQX5	[R].VGNLGLATSFFNER.[N]	Q3TQX5 [535-548]
Q3UAG2	[K].GILFVGSGVSGGEEGAR.[Y]	Q3UAG2 [120-136]
P62852	[K].LITPAVVSER.[L]	P62852 [67-76]
P60843	[K].DQIYDIFQK.[L]	P60843 [194-202]
Q08943	[R].FDEISFVNFAR.[G]	Q08943 [371-381]
E9PYL9	[K].VLEQLTGQTPVFSK.[A]	E9PYL9 [39-52]
P05202	[R].FVTVQTISGTGALR.[V]	P05202 [126-139]
Q62318	[K].VFPGSTTEDYNLIVIER.[G]	Q62318 [508-524]
P09041; P09411	[K].VSHVSTGGGASLELLEGK.[IV]	P09041 [389-406]; P09411 [389-406]
P11499; Q3UAD6	[R].ELISNASDALDK.[I]	P11499 [42-53]; Q3UAD6 [103-114]
Q6P5F9	[K].LLSEEVFDFSSGQITQVK.[A]	Q6P5F9 [173-190]
P80313	[K].LPIGDVATQYFADR.[D]	P80313 [293-306]
P38647	[K].VQQTVQDLFGR.[A]	P38647 [395-405]
Q9D6F9; Q9ERD7; P68372; Q922F4	[R].ALTVPELTQQMFDAK.[N]	Q9D6F9 [283-297]; Q9ERD7 [283-297]; P68372 [283-297]; Q922F4 [283-297]
P62301	[K].GLTPSQIGVILR.[D]	P62301 [44-55]
P43276	[K].ALAAGGYDVEK.[N]	P43276 [65-75]
P20029	[K].SQIFSTASDNQPTVTIK.[V]	P20029 [449-465]
A0A0N4SVP8	[K].QFFVAVER.[E]	A0A0N4SVP8 [253-260]
J3QMG3	[K].LTLDTIFVPNTGK.[K]	J3QMG3 [98-110]
Q3THQ5	[R].LAYINPDLALEEK.[N]	Q3THQ5 [352-364]
Q04447	[K].VLTPELYAELR.[A]	Q04447 [33-43]
Q3TQX5	[K].SPILVATAVAAR.[G]	Q3TQX5 [492-503]
P11983	[K].FATEAAITILR.[I]	P11983 [516-526]
P14069	[K].LQDAEIAR.[L]	P14069 [48-55]
P62852	[R].AALQELLSK.[G]	P62852 [86-94]
Q3UA81	[K].STTTGHLIYK.[C]	Q3UA81 [21-30]
P51881	[K].QIFLGGVDK.[R]	P51881 [97-105]
P56480	[R].AIAELGIYPAVDPLDSTSR.[I]	P56480 [388-406]
P63017	[K].EIAEAYLGK.[TA]	P63017 [129-137]
P20029	[K].SDIDEIVLVGGSTR.[I]	P20029 [355-368]
B2CY77	[K].SDGIYIINLK.[R]	B2CY77 [43-52]
Q3UER8	[R].YLQEIYNSNNQK.[I]	Q3UER8 [134-145]
Q7TMM9; Q9ERD7; P99024	[R].AILVDLEPGTMDSVR.[S]	Q7TMM9 [63-77]; Q9ERD7 [63-77]; P99024 [63-77]
P52480	[K].GVNLPGAAVDLPAVSEK.[D]	P52480 [208-224]
Q8BTM8	[R].VTYTPMAPGSYLISIK.[Y]	Q8BTM8 [2485-2500]
Q3TKG4	[K].DSYLILETLPTEYDSR.[V]	Q3TKG4 [219-234]
Q8C2Q7	[R].STGEAFVQFASQEIAEK.[A]	Q8C2Q7 [151-167]
Q3UW40	[R].AITGASLADIMAK.[R]	Q3UW40 [81-93]
G5E902	[R].IQTQPGYANTLR.[E]	G5E902 [186-197]
Q3U536	[R].TVSLGAGAK.[D]	Q3U536 [46-54]
O35641	[R].FIAVGYVDDTQFVR.[F]	O35641 [43-56]
P70670	[K].NILFVITKPDVYK.[S]	P70670 [2073-2085]
Q3UIF3	[R].APFDLFENR.[K]	Q3UIF3 [348-356]
Q3UDJ7; Q7TPR4	[R].FAIQDISVEETSAK.[E]	Q3UDJ7 [154-167]; Q7TPR4 [134-147]
P97351	[R].VFEVSLADLQNDEVAFR.[K]	P97351 [66-82]
Q3UA81	[R].EHALLAYTLGVK.[Q]	Q3UA81 [135-146]
V9GXF8	[R].DFAFVAFDDHDSVDK.[I]	V9GXF8 [11-25]
Q9DCY1	[K].DTNGSQFFITTVK.[T]	Q9DCY1 [146-158]
P20152	[K].VELQELNDR.[F]	P20152 [105-113]
Q9Z1N5	[R].ILVATNLFGR.[G]	Q9Z1N5 [340-349]
Q91V99	[R].FVNVVPTFGK.[K]	Q91V99 [120-129]
B2RTM0	[R].DNIQGITKPAIR.[R]	B2RTM0 [25-36]
P05214; A0A0A0MQA5	[K].AYHEQLSVAEITNACFEPANQMVK.[C]	P05214 [281-304]; A0A0A0MQA5 [310-333]
Q8VCG1	[R].GNVGVVLFNFGK.[E]	Q8VCG1 [143-154]
P58252	[K].AYLPVNESFGFTADLR.[S]	P58252 [786-801]
Q4VAG4	[K].ITVTSEVPFSK.[R]	Q4VAG4 [70-80]
P63017	[K].NQVAMNPTNTVFDAK.[R]	P63017 [57-71]
P19324	[R].LYGPSSVSFADDFVR.[S]	P19324 [133-147]
P84078	[R].ILMVGLDAAGK.[T]	P84078 [20-30]
P40142	[R].VLDPFTIKPLDR.[K]	P40142 [531-542]
Q3U536	[R].MTDQEAIQDLWQWR.[K]	Q3U536 [276-289]
P20152	[K].FADLSEAANR.[N]	P20152 [295-304]
E9Q070	[K].IIQLLDDYPK.[C]	E9Q070 [17-26]
Q8BT90	[K].LLDFGSLSNLQVTQPTVGMNFK.[T]	Q8BT90 [114-135]
Q5EBQ6	[K].FLDGIYVSEK.[G]	Q5EBQ6 [175-184]
P05214; P68373	[K].TIGGGDDSFNTFFSETGAGK.[H]	P05214 [41-60]; P68373 [41-60]
Q3U4U6	[R].AVAQALEVIPR.[T]	Q3U4U6 [439-449]
B7U582; P63017	[K].LLQDFFNGK.[E]	B7U582 [352-360]; P63017 [349-357]
P70670	[K].DIELVMSQANVSR.[A]	P70670 [2152-2164]
D3Z1V4	[K].LYTLVLTDPDAPSR.[K]	D3Z1V4 [63-76]
Q4VAG4	[K].AGNLGGGVVTIER.[S]	Q4VAG4 [53-65]
E9PZF0	[R].VMLGETNPADSKPGTIR.[G]	E9PZF0 [89-105]; [204-220]
Q3UIF3; P11499	[K].ADLINNLGTIAK.[S]	Q3UIF3 [101-112]; P11499 [96-107]
P17751	[K].VVLAYEPVWAIGTGK.[T]	P17751 [211-225]
Q497E9	[K].ELEFYLR.[K]	Q497E9 [194-200]
P35979	[R].QAQIEVVPSASALIIK.[A]	P35979 [68-83]
Q6ZWV7	[R].VLTVINQTQK.[E]	Q6ZWV7 [57-66]
P05214	[R].AVFVDLEPTVVDEVR.[T]	P05214 [65-79]
Q3UK83	[R].GFAFVTFDDHDSVDK.[I]	Q3UK83 [147-161]
Q61990	[R].IITLAGPTNAIFK.[A]	Q61990 [58-70]
Q3U6P5	[K].GFAFVQYVNER.[N]	Q3U6P5 [51-61]
B2CSK2; P17879	[K].DAGVIAGLNVLR.[I]	B2CSK2 [162-173]; P17879 [160-171]
Q149Z9	[K].ASGPPVSELITK.[A]	Q149Z9 [36-47]
E9PW66	[K].YAVLYQPLFDK.[R]	E9PW66 [133-143]
O88569	[R].GFGFVTFDDHDPVDK.[I]	O88569 [154-168]
Q3UCL7	[R].TEIIILATR.[T]	Q3UCL7 [46-54]
D3Z2H9	[K].LVIIEGDLER.[T]	D3Z2H9 [133-142]
Q3TVV6	[K].SSGPTSLFAVTVAPPGAR.[Q]	Q3TVV6 [182-199]
P17742	[K].FEDENFILK.[HF]	P17742 [83-91]
P20152	[K].VESLQEEIAFLK.[K]	P20152 [224-235]
Q3UJI2	[K].TPSSDVLVFDYTK.[H]	Q3UJI2 [143-155]
Q564E8	[R].IEEVPELPLVVEDK.[V]	Q564E8 [144-157]
Q9Z2X1	[K].ITGEAFVQFASQELAEK.[A]	Q9Z2X1 [151-167]
Q3TXE5	[K].APVPTGEVYFADSFDR.[G]	Q3TXE5 [63-78]
P63038	[K].APGFGDNR.[K]	P63038 [302-309]
Q7TMM9; Q9D6F9; Q9ERD7; P99024; P68372; Q922F4	[K].LAVNMVPFPR.[L]	Q7TMM9 [253-262]; Q9D6F9 [253-262]; Q9ERD7 [253-262]; P99024 [253-262]; P68372 [253-262]; Q922F4 [253-262]
P63038	[K].VGLQVVAVK.[A]	P63038 [293-301]
B2RTM0	[K].TVTAMDVVYALK.[R]	B2RTM0 [81-92]
Q9D1R9	[R].IVYLYTK.[K]	Q9D1R9 [30-36]
P62830	[R].LPAAGVGDMVMATVK.[K]	P62830 [52-66]
P62320	[R].VAQLEQVYIR.[G]	P62320 [55-64]
Q6ZWN5	[K].LDYILGLK.[I]	Q6ZWN5 [94-101]
P62827	[K].LVLVGDGGTGK.[T]	P62827 [13-23]
Q3TVV6	[R].NFILDQTNVSAAAQR.[R]	Q3TVV6 [552-566]
Q5FW97	[K].TIAPALVSK.[K]	Q5FW97 [72-80]
P61255	[K].YVIYIER.[V]	P61255 [78-84]
P48036	[R].SEIDLFNIR.[K]	P48036 [275-283]
P63038	[K].NAGVEGSLIVEK.[I]	P63038 [482-493]
Q6A0D0	[K].LSILYPATTGR.[N]	Q6A0D0 [148-158]
P20029	[K].FEELNMDLFR.[S]	P20029 [328-337]
Q3TL71	[R].IITITGTQDQIQNAQYLLQNSVK.[SQ]	Q3TL71 [434-456]
P09103	[R].ILEFFGLK.[K]	P09103 [303-310]
P07356	[K].SLYYYIQQDTK.[G]	P07356 [314-324]
P68373	[K].EIIDLVLDR.[I]	P68373 [113-121]
Q9D6F9; Q9ERD7; P99024; P68372	[R].IMNTFSVVPSPK.[V]	Q9D6F9 [163-174]; Q9ERD7 [163-174]; P99024 [163-174]; P68372 [163-174]
P16045	[K].SFVLNLGK.[D]	P16045 [30-37]
Q546G4	[K].SLHTLFGDK.[L]	Q546G4 [89-97]
Q3V0Z8; Q3U741	[K].APILIATDVASR.[G]	Q3V0Z8 [467-478]; Q3U741 [390-401]
Q149Z9	[K].ALAAAGYDVEK.[N]	Q149Z9 [66-76]
P63017	[K].SQIHDIVLVGGSTR.[I]	P63017 [329-342]
A0A0A0MQF6	[K].LTGMAFR.[V]	A0A0A0MQF6 [252-258]
Q3U536	[K].DELHIVEAEAMNYEGSPIK.[V]	Q3U536 [55-73]
P45591; P18760	[R].YALYDATYETK.[E]	P45591 [82-92]; P18760 [82-92]
Q9WV02	[R].GFAFVTFESPADAK.[D]	Q9WV02 [50-63]
P62855	[R].DISEASVFDAYVLPK.[L]	P62855 [52-66]
P60710	[R].VAPEEHPVLLTEAPLNPK.[AR]	P60710 [96-113]
P05214; P68373	[K].DVNAAIATIK.[T]	P05214 [327-336]; P68373 [327-336]
P99027	[K].LASVPAGGAVAVSAAPGSAAPAAGSAPAAAEEK.[K]	P99027 [62-94]
P62918	[R].AVVGVVAGGGR.[I]	P62918 [164-174]
P70670	[K].SPASDTYIVFGEAK.[I]	P70670 [2086-2099]
Q9D6F9; P68372	[R].AVLVDLEPGTMDSVR.[S]	Q9D6F9 [63-77]; P68372 [63-77]
P99024	[R].ISVYYNEATGGK.[Y]	P99024 [47-58]
F6VW30; O70456; Q9CQV8; P63101; Q5SS40	[R].NLLSVAYK.[N]	F6VW30 [100-107]; O70456 [42-49]; Q9CQV8 [44-51]; P63101 [42-49]; Q5SS40 [43-50]
Q3UXQ6	[R].LSNIFVIGK.[G]	Q3UXQ6 [222-230]
P07356	[K].GVDEVTIVNILTNR.[S]	P07356 [50-63]
P84078	[R].DAVLLVFANK.[Q]	P84078 [118-127]
P62305	[K].VMVQPINLIFR.[Y]	P62305 [13-23]
P51881	[K].DFLAGGVAAAISK.[T]	P51881 [11-23]
Q5CZY9	[K].LLEPVLLLGK.[E]	Q5CZY9 [77-86]
P51881	[R].YFPTQALNFAFK.[D]	P51881 [81-92]
Q8BL97	[R].NPPGFAFVEFEDPR.[D]	Q8BL97 [74-87]
Q921L4	[R].KESYSVYVYK.[VG]	Q921L4 [35-44]
Q3UIF3; P11499	[R].TLTLVDTGIGMTK.[A]	Q3UIF3 [88-100]; P11499 [83-95]
P63017	[K].TVTNAVVTVPAYFNDSQR.[QL]	P63017 [138-155]
Q5BLJ9	[K].VVLVLAGR.[Y]	Q5BLJ9 [10-17]
Q7TMM9; P68372	[K].MSATFIGNSTAIQELFK.[R]	Q7TMM9 [363-379]; P68372 [363-379]
Q922F4	[K].MASTFIGNSTAIQELFK.[R]	Q922F4 [363-379]
Q9ERD7	[K].MSSTFIGNSTAIQELFK.[R]	Q9ERD7 [363-379]
P62830	[K].NLYIISVK.[G]	P62830 [36-43]
P60710; P68134	[K].AGFAGDDAPR.[A]	P60710 [19-28]; P68134 [21-30]
P63038	[K].VGEVIVTK.[D]	P63038 [345-352]
P63038	[K].LVQDVANNTNEEAGDGTTTATVLAR.[S]	P63038 [97-121]
B2RTM0	[K].TVTAMDVVYALK.[R]	B2RTM0 [81-92]
Q3UIF3; P11499; Q3TK29	[R].GVVDSEDLPLNISR.[E]	Q3UIF3 [388-401]; P11499 [379-392]; Q3TK29 [391-404]
P63038	[R].TVIIEQSWGSPK.[V]	P63038 [61-72]
P27661	[R].AGLQFPVGR.[VI]	P27661 [22-30]
B7U582; P63017; B2CSK2; P17879	[R].TTPSYVAFTDTER.[L]	B7U582 [38-50]; P63017 [37-49]; B2CSK2 [39-51]; P17879 [37-49]
Q7TMM9; Q9ERD7; P99024	[R].AILVDLEPGTMDSVR.[S]	Q7TMM9 [63-77]; Q9ERD7 [63-77]; P99024 [63-77]
A0A0A0MQF6	[R].VIISAPSADAPMFVMGVNHEK.[Y]	A0A0A0MQF6 [143-163]
P35700	[R].LVQAFQFTDK.[H]	P35700 [159-168]
Q9D8N0	[K].ALIAAQYSGAQVR.[V]	Q9D8N0 [18-30]
P56480	[R].VALTGLTVAEYFR.[D]	P56480 [282-294]
Q3UA81	[K].QLIVGVNK.[M]	Q3UA81 [147-154]
P52480	[R].APIIAVTR.[N]	P52480 [448-455]
B2RTM0	[R].ISGLIYEETR.[G]	B2RTM0 [47-56]
Q3UIF3	[R].ALLFVPR.[R]	Q3UIF3 [340-346]
P20029; B7U582; P63017; B2CSK2	[R].IINEPTAAAIAYGLDK.[RGK]	P20029 [199-214]; B7U582 [173-188]; P63017 [172-187]; B2CSK2 [174-189]
Q9D6F9; Q9ERD7; P68372; Q922F4	[R].ALTVPELTQQMFDAK.[N]	Q9D6F9 [283-297]; Q9ERD7 [283-297]; P68372 [283-297]; Q922F4 [283-297]
Q7TMM9; Q9D6F9; Q9ERD7; P99024; P68372	[R].ISEQFTAMFR.[R]	Q7TMM9 [381-390]; Q9D6F9 [381-390]; Q9ERD7 [381-390]; P99024 [381-390]; P68372 [381-390]
Q3UA81	[R].LPLQDVYK.[I]	Q3UA81 [248-255]
F6VW30; O70456; Q9CQV8; P63101; Q5SS40	[K].DSTLIMQLLR.[D]	F6VW30 [271-280]; O70456 [215-224]; Q9CQV8 [215-224]; P63101 [213-222]; Q5SS40 [216-225]
Q3UK83	[K].LFIGGLSFETTDESLR.[S]	Q3UK83 [16-31]
O88569	[K].IDTIEIITDR.[Q]	O88569 [138-147]
P17742	[R].VSFELFADK.[V]	P17742 [20-28]
Q3UA81	[K].IGGIGTVPVGR.[V]	Q3UA81 [256-266]
P11499	[R].ALLFIPR.[R]	P11499 [331-337]
G5E8N5	[K].LVIITAGAR.[MQL]	G5E8N5 [120-128]
Q3UA81	[K].YYVTIIDAPGHR.[D]	Q3UA81 [85-96]
Q921L4	[K].ESYSVYVYK.[VG]	Q921L4 [36-44]
P68373	[R].AVFVDLEPTVIDEVR.[TA]	P68373 [65-79]
Q921L4	[R].LLLPGELAK.[H]	Q921L4 [101-109]
B2RTM0	c	B2RTM0 [61-68]

## Sheet: HeLa Peptide Replicate 1
UniProt ID	Peptide Sequence	Positions in Master Proteins
Q03141	[K].VLDANNCDYEQR.[E]	Q03141 [682-693]
D3YWN7	[R].SVSTMNLSK.[H]	D3YWN7 [181-189]
Q3UZG3	[R].SSGSPYGGGYGSGGGSGGYGSR.[R]	Q3UZG3 [356-377]
Q6NZJ6	[K].VEYTLGEESEAPGQR.[T]	Q6NZJ6 [1422-1436]
Q9JMK2	[R].SAAEPVASTPASR.[I]	Q9JMK2 [343-355]
Q3UV17	[K].AEAEALYQTK.[FL]	Q3UV17 [354-363]
Q69ZR2	[R].MAAAGGTVSGPSSACKPGR.[S]	Q69ZR2 [240-258]
Q32P04	[R].QSSVSFR.[S]	Q32P04 [4-10]
D3YWC0	[R].LSYNTASNK.[T]	D3YWC0 [11-19]
Q5BLK1	[R].MATEVAADALGEEWK.[G]	Q5BLK1 [32-46]
Q7TMM9; Q9D6F9; Q9ERD7; P99024; P68372; Q922F4	[K].NMMAACDPR.[H]	Q7TMM9 [298-306]; Q9D6F9 [298-306]; Q9ERD7 [298-306]; P99024 [298-306]; P68372 [298-306]; Q922F4 [298-306]
Q9JHU4	[K].EFGPVVIDYGK.[V]	Q9JHU4 [1099-1109]
Q8BTM8	[K].MDCQECPEGYR.[V]	Q8BTM8 [2474-2484]
Q3THQ5	[R].IGNSYFKEEK.[Y]	Q3THQ5 [306-315]
F7BGR7	[R].TAPGMGDQSGCYR.[C]	F7BGR7 [268-280]
P97350	[R].FSSYSQMENWSR.[H]	P97350 [118-129]
Q3TI05	[R].AQAALAVNISAAR.[G]	Q3TI05 [16-28]
Q5SS40	[K].VAGMDVELTVEER.[N]	Q5SS40 [30-42]
P68040	[R].DETNYGIPQR.[A]	P68040 [48-57]
Q99LX0	[K].VTVAGLAGKDPVQCSR.[D]	Q99LX0 [33-48]
Q11011	[R].YAAVTQFEATDAR.[R]	Q11011 [174-186]
Q3UZH3	[K].VVGDVAYDEAK.[E]	Q3UZH3 [254-264]
B2RWW6	[R].VISESPPDQWEAR.[C]	B2RWW6 [1222-1234]
Q3TZ32	[R].AVFDETYPDPVR.[V]	Q3TZ32 [684-695]
Q7TQG1	[R].VAAVQPSDNISR.[K]	Q7TQG1 [111-122]
Q8C196	[K].TVLMNPNIASVQTNEVGLK.[Q]	Q8C196 [459-477]
A2AFQ0	[R].SSESELCIETPK.[L]	A2AFQ0 [3234-3245]
Q8K2D3	[K].GAQGISCGR.[H]	Q8K2D3 [347-355]
Q5I0T8	[K].VWLDPNETNEIANANSR.[Q]	Q5I0T8 [22-38]
Q3TQX5	[R].DLMACAQTGSGK.[T]	Q3TQX5 [219-230]
A0A0A0MQ97	[R].VTDSSVSVQLR.[E]	A0A0A0MQ97 [280-290]
Q9QUM9	[R].LYQVEYAFK.[A]	Q9QUM9 [22-30]
Q9QXT0	[R].INPDGSQSVVEVPYAR.[S]	Q9QXT0 [58-73]
Q3THJ6	[K].MLSCAGADR.[LS]	Q3THJ6 [102-110]
Q9CY58	[K].SAAQAAAQTNSNAAGK.[Q]	Q9CY58 [53-68]
Q80UT7	[R].QTATQLLK.[L]	Q80UT7 [94-101]
Q5M9M5	[R].LAPDYDALDVANK.[I]	Q5M9M5 [140-152]
P58252	[K].GPLMMYISK.[M]	P58252 [392-400]
Q5FW97	[R].GNPTVEVDLYTAK.[G]	Q5FW97 [16-28]
P35700	[K].ATAVMPDGQFK.[D]	P35700 [17-27]
P19096	[R].DGAWGAFR.[H]	P19096 [1501-1508]
Q9JHU4	[R].IQFVGACNPPTDPGR.[K]	Q9JHU4 [2704-2718]
P62918	[R].AVVGVVAGGGR.[I]	P62918 [164-174]
Q3U630	[R].QVMVVPVGPTCDEYAQK.[V]	Q3U630 [619-635]
P70168	[K].QDENDDDDDWNPCK.[A]	P70168 [333-346]
E9Q557	[R].QVQNLVNK.[S]	E9Q557 [446-453]
Q80TM2	[K].VLVQNAAGSQEK.[L]	Q80TM2 [2055-2066]
B2RTM0	[R].DNIQGITKPAIR.[R]	B2RTM0 [25-36]
P63101	[K].SVTEQGAELSNEER.[N]	P63101 [28-41]
Q7TMM9	[R].INVYYNEAAGNK.[Y]	Q7TMM9 [47-58]
Q9ERD7	[K].MSSTFIGNSTAIQELFK.[R]	Q9ERD7 [363-379]
Q3UIJ2	[K].IVLTNPVCTEVGEK.[I]	Q3UIJ2 [427-440]
Q3UDJ7	[K].LSGSNPYTTVTPQIINSK.[W]	Q3UDJ7 [606-623]
O88569	[R].NMGGPYGGGNYGPGGSGGSGGYGGR.[S]	O88569 [326-350]
Q8VDD5	[R].NTDQASMPDNTAAQK.[V]	Q8VDD5 [359-373]
Q9R0P4	[K].INEELESQYQQSMDSK.[L]	Q9R0P4 [76-91]
Q8C2Q3	[R].LSESQLSFR.[R]	Q8C2Q3 [617-625]
P70398	[R].ELDMEPYTVAGVAK.[L]	P70398 [1821-1834]
O88738	[R].VSVTTNTTDSVSDEEK.[V]	O88738 [2967-2982]
Q80X90	[K].TYSVEYLPK.[V]	Q80X90 [314-322]
P20152	[K].FADLSEAANR.[N]	P20152 [295-304]
B9EHN0	[R].LDQPMTEIVSR.[V]	B9EHN0 [1011-1021]
P20029	[K].ETAEAYLGK.[K]	P20029 [156-164]
P02301	[R].EIAQDFK.[T]	P02301 [74-80]
Q497E9	[R].ADGYVLEGK.[E]	Q497E9 [185-193]
Q3UDJ7	[R].ELPPDQAEYCIAR.[M]	Q3UDJ7 [871-883]
Q6ZQK2	[R].EEIQSSISGVTAAYNR.[E]	Q6ZQK2 [747-762]
Q9WV02	[K].LFIGGLNTETNEK.[A]	Q9WV02 [10-22]
Q3TQX5	[R].VGSTSENITQK.[V]	Q3TQX5 [408-418]
Q8BFY9	[K].GDVEEDETIPDSEQDIRPR.[F]	Q8BFY9 [328-346]
Q3TLP8	[K].YLECSALTQR.[G]	Q3TLP8 [173-182]
Q3UIF3; P11499	[R].YESLTDPSKLDSGK.[E]	Q3UIF3 [61-74]; P11499 [56-69]
Q9JHU4	[K].NYMSNPSYNYEIVNR.[A]	Q9JHU4 [3368-3382]
Q8C671	[R].DAEDAMDAMDGAVLDGR.[E]	Q8C671 [67-83]
Q6ZQ38	[R].TYIQCIAAISR.[Q]	Q6ZQ38 [233-243]
Q80TM2	[K].AVEGCVSASQAATEDGQLLR.[G]	Q80TM2 [769-788]
P08249	[K].GCDVVVIPAGVPR.[K]	P08249 [92-104]
P29341	[R].SLGYAYVNFQQPADAER.[A]	P29341 [51-67]
Q3TIP8	[K].NSNPALNDNLEK.[G]	Q3TIP8 [120-131]
A2AFQ0	[K].ADGTATAPPPR.[S]	A2AFQ0 [707-717]
P63037	[K].QISQAYEVLADSK.[K]	P63037 [47-59]
P40142	[K].HQPTAIIAK.[T]	P40142 [233-241]
Q3TQX5	[R].QSSGASSSSFSSSR.[A]	Q3TQX5 [604-617]
Q99MR6	[K].EFLLSLDDSVDETEAVK.[R]	Q99MR6 [154-170]
P27659	[K].NNASTDYDLSDK.[S]	P27659 [301-312]
P70168	[R].VLANPGNSQVAR.[V]	P70168 [43-54]
Q02257	[R].LAEPSQLLK.[S]	Q02257 [116-124]
Q3UCL7	[R].GLCAIAQAESLR.[Y]	Q3UCL7 [95-106]
Q5CZY9	[K].TATAVAHCK.[R]	Q5CZY9 [44-52]
Q3UXQ6	[K].VNDTIQIDLETGK.[I]	Q3UXQ6 [156-168]
P09103	[K].VDATEESDLAQQYGVR.[G]	P09103 [84-99]
A0A0A0MQA5	[K].EIIDPVLDR.[I]	A0A0A0MQA5 [142-150]
P24547	[K].EANEILQR.[S]	P24547 [196-203]
Q80U89	[R].TSIDAYDNFDNISLAQR.[L]	Q80U89 [1491-1507]
A2AFQ0	[R].IVNQPSSLFGSK.[S]	A2AFQ0 [2257-2268]
P09103	[K].MDSTANEVEAVK.[V]	P09103 [427-438]
Q8BTM8	[K].VTAQGPGLEPSGNIANK.[T]	Q8BTM8 [384-400]
Q80X90	[K].AEISCIDNK.[D]	Q80X90 [1864-1872]
G3UZA7	[K].VAGQDGSVVQFK.[I]	G3UZA7 [24-35]
Q8BTM8	[K].SPFEVYVDK.[S]	Q8BTM8 [368-376]
B2RQC6	[K].ATGYPLAYVAAK.[L]	B2RQC6 [697-708]
Q80X90	[K].VAVTEGCQPSR.[V]	Q80X90 [1320-1330]
Q02257	[R].TMQNTSDLDTAR.[C]	Q02257 [192-203]
Q5BLK1	[K].DIPGLTDTTVPR.[R]	Q5BLK1 [120-131]
Q8BTM8	[R].EAGAGGLAIAVEGPSK.[A]	Q8BTM8 [2265-2280]
Q8VIJ6	[R].FGQGGAGPVGGQGPR.[G]	Q8VIJ6 [659-673]
P31254; B9EHN0	[R].KPLLESGTLGTK.[G]	P31254 [592-603]; B9EHN0 [593-604]
Q3TWG2	[K].YEQGTGCWQGPNR.[S]	Q3TWG2 [458-470]
Q3U741	[R].CTYLVLDEADR.[M]	Q3U741 [240-250]
P60710	[K].QEYDESGPSIVHR.[K-]	P60710 [360-372]
Q8C196	[K].VPAIYGVDTR.[M]	Q8C196 [158-167]
A2AFQ0	[R].WCSYSASNNSTIDSAWK.[S]	A2AFQ0 [1627-1643]
Q80X90	[K].VNQPASFAIR.[L]	Q80X90 [2302-2311]
Q8R1B4	[R].TEPTAQQNLALQLAEK.[L]	Q8R1B4 [845-860]
P50446; Q6IFZ8	[K].QEIAEINR.[MI]	P50446 [368-375]; Q6IFZ8 [368-375]
B2RQC6	[R].LGGAVLSFSEATSSVQK.[G]	B2RQC6 [1987-2003]
B9EIU1	[R].VAVQGDVVR.[E]	B9EIU1 [757-765]
P11152	[R].ITGLDPAGPNFEYAEAPSR.[L]	P11152 [179-197]
Q69ZR2	[R].SSSDNNTNTLGR.[N]	Q69ZR2 [1574-1585]
Q9JHU4	[R].TPNGVVLAPVQLGK.[W]	Q9JHU4 [2642-2655]
Q8VDD5	[K].IAQLEEQLDNETK.[E]	Q8VDD5 [1816-1828]
P27773	[R].LAPEYEAAATR.[L]	P27773 [63-73]
Q8C2Q3	[R].ASYVAPLTAQPATYR.[A]	Q8C2Q3 [224-238]
Q9QYJ3	[R].DGSDVIYPAR.[I]	Q9QYJ3 [250-259]
P56480	[K].VALVYGQMNEPPGAR.[A]	P56480 [265-279]
Q3TF18; P11103	[K].SDAYYCTGDVTAWTK.[C]	Q3TF18 [307-321]; P11103 [306-320]
Q8BLY1	[R].YVMPSCESDAR.[A]	Q8BLY1 [297-307]
Q80X90; Q8VHX6	[K].GAGTGGLGLTVEGPCEAK.[I]	Q80X90 [1067-1084]; Q8VHX6 [1090-1107]
P58252	[R].YFDPANGK.[F]	P58252 [265-272]
Q80TM2	[K].LAQAAQSSVATITR.[L]	Q80TM2 [2067-2080]
P63017	[R].FDDAVVQSDMK.[H]	P63017 [78-88]
P07356	[R].QDIAFAYQR.[R]	P07356 [69-77]
Q5SUR0	[R].IGVGGGAASSVQVQGDNTSDLDFGAVQR.[G]	Q5SUR0 [459-486]
Q8BTM8	[R].EATTEFSVDAR.[A]	Q8BTM8 [1273-1283]
Q8BH39	[K].DVGAAPAFEAPR.[S]	Q8BH39 [62-73]
Q80TM2	[R].SAQPASAEPR.[Q]	Q80TM2 [648-657]
Q3THQ5	[R].AMADPEVQQIMSDPAMR.[L]	Q3THQ5 [489-505]
Q9JHU4	[R].SIPLDEGEDEAQR.[R]	Q9JHU4 [2382-2394]
Q3UK83	[R].NQGGYGGSSSSSSYGSGR.[R]	Q3UK83 [354-371]
Q52KC1	[K].GYDVIAQAQSGTGK.[T]	Q52KC1 [70-83]
B2RWW6	[R].QAGAEALSQAVAR.[Y]	B2RWW6 [1177-1189]
Q3UIF3; P11499	[K].EDQTEYLEER.[R-]	Q3UIF3 [192-201]; P11499 [187-196]
Q8BTM8	[K].DNGNGTYSCSYVPR.[K]	Q8BTM8 [725-738]
Q8C196	[K].VLGTSVESIMATEDR.[Q]	Q8C196 [533-547]
Q922F4	[R].EIVHIQAGQCGNQIGTK.[F]	Q922F4 [3-19]
A2AN08	[R].ILGPAESDEFLAR.[V]	A2AN08 [1336-1348]
F6VW30	[K].AVTEQGAELSNEER.[N]	F6VW30 [86-99]
Q9JHU4	[R].LGGSPFGPAGTGK.[T]	Q9JHU4 [1898-1910]
P50247	[K].VAVVAGYGDVGK.[G]	P50247 [215-226]
Q61990	[R].LVVPASQCGSLIGK.[G]	Q61990 [102-115]
Q9JHU4	[K].VMSQEIQEQLHK.[Q]	Q9JHU4 [3253-3264]
Q6A0F1	[K].LATNAAVTVLR.[V]	Q6A0F1 [517-527]
P97355	[K].NGSFANLR.[I]	P97355 [55-62]
Q3TVV6	[R].NFILDQTNVSAAAQR.[R]	Q3TVV6 [552-566]
Q32P04	[R].EYQELMNTK.[L]	Q32P04 [446-454]
Q3UZH3	[R].GDLNDCFIPCTPK.[G]	Q3UZH3 [140-152]
Q3UIF3; P11499	[R].TLTLVDTGIGMTK.[A]	Q3UIF3 [88-100]; P11499 [83-95]
Q6ZQK2	[K].IFYPETTDIYDR.[K]	Q6ZQK2 [155-166]
P24547	[R].YFSEADKIK.[V]	P24547 [430-438]
A2AFQ0	[R].LGSSGLGSASSIQAAVR.[Q]	A2AFQ0 [3752-3768]
D3YWN7	[R].LSSSSATLLNSPDR.[A]	D3YWN7 [199-212]
P52480	[K].GDYPLEAVR.[M]	P52480 [368-376]
O08807	[R].SVDETLR.[L]	O08807 [227-233]
Q5BLJ9	[K].VYNYNHLMPTR.[Y]	Q5BLJ9 [74-84]
Q3TFF0	[K].NVLCSACSGQGGK.[S]	Q3TFF0 [140-152]
Q76MZ3	[K].VLAMSGDPNYLHR.[M]	Q76MZ3 [486-498]
Q571M2	[K].ELSTTLNADEAVTR.[G]	Q571M2 [449-462]
P19096	[K].QVQPEGPYR.[I]	P19096 [2288-2296]
Q8C671	[R].VGDVYIPR.[D]	Q8C671 [40-47]
P20029	[R].ITPSYVAFTPEGER.[L]	P20029 [62-75]
Q8BTM8	[K].VNQPASFAVSLNGAK.[G]	Q8BTM8 [2347-2361]
A6ZI44	[R].QLLLTADDR.[V]	A6ZI44 [115-123]
P70168	[R].VAAGLQIK.[N]	P70168 [55-62]
Q8BTM8	[K].DGSCGVAYVVQEPGDYEVSVK.[F]	Q8BTM8 [2290-2310]
Q80X90; Q8VHX6	[R].EAGAGGLSIAVEGPSK.[A]	Q80X90 [2220-2235]; Q8VHX6 [2342-2357]
Q6A0D0	[RK].DFTPVCTTELGR.[A]	Q6A0D0 [45-56]
A6ZI44	[R].LQSIGTENTEENR.[R]	A6ZI44 [98-110]
F7BGR7	[R].VADLTEQYNEQYGAVR.[T]	F7BGR7 [299-314]
Q5FW97; P21550	[K].VNQIGSVTESLQACK.[L]	Q5FW97 [344-358]; P21550 [344-358]
Q58EU8	[R].HNSYTCEATHK.[T]	Q58EU8 [214-224]
E9Q557	[R].SQLQISNNR.[T]	E9Q557 [1766-1774]
P62960	[K].GAEAANVTGPGGVPVQGSK.[Y]	P62960 [117-135]
P56399	[R].DRVTSAVEALLSADSASR.[K]	P56399 [145-162]
P62301	[K].GLSQSALPYR.[R]	P62301 [10-19]
Q80U89	[K].LLYNNVSNFGR.[L]	Q80U89 [1226-1236]
Q6ZPT2	[K].GTGVVTSVPSDSPDDLAALR.[D]	Q6ZPT2 [419-438]
B2RQC6	[R].FLSSAAAVSK.[E]	B2RQC6 [1110-1119]
Q6ZQK2	[K].QLSSSVTGLTNIEEENCQR.[Y]	Q6ZQK2 [502-520]
Q9D6F9; P68372	[R].AVLVDLEPGTMDSVR.[S]	Q9D6F9 [63-77]; P68372 [63-77]
B9EHN0	[R].LDQPMTEIVSR.[V]	B9EHN0 [1011-1021]
B2CSK2	[K].NQVAMNPQNTVFDAK.[R]	B2CSK2 [59-73]
P07356	[R].AEDGSVIDYELIDQDAR.[E-]	P07356 [180-196]
Q80TM2	[K].VVAPTISSPVCQEQLVEAGR.[L]	Q80TM2 [745-764]
P07356	[K].SLYYYIQQDTK.[G]	P07356 [314-324]
A0A0A6YX26	[R].SAINEVVTR.[E]	A0A0A6YX26 [15-23]
Q3V117	[K].LYRPGSVAYVSR.[S]	Q3V117 [651-662]
P38647	[K].DAGQISGLNVLR.[V]	P38647 [207-218]
Q3TZ32	[K].ITCLCQVPQNAANR.[G]	Q3TZ32 [899-912]
P11103	[R].VVSEDFLQDVSASTK.[S]	P11103 [453-467]
Q58EU8	[R].QNGVLNSWTDQDSK.[D]	Q58EU8 [181-194]
P50446; Q8BGZ7; Q8VED5	[RK].SRAEAESWYQTK.[Y]	P50446 [337-348]; Q8BGZ7 [335-346]; Q8VED5 [325-336]
O70569	[K].TPGPGAQSALR.[A]	O70569 [107-117]
Q8BTM8	[K].AGVAPLQVK.[V]	Q8BTM8 [1478-1486]
Q8R4B4	[R].GDFCIQVGR.[NT]	Q8R4B4 [106-114]
P06745	[K].TFTTQETITNAETAK.[E]	P06745 [212-226]
P60335	[R].LVVPATQCGSLIGK.[G]	P60335 [102-115]
P23116	[R].NQLTAMSSVLAK.[A]	P23116 [521-532]
O88291	[R].NQGGSSWEAPYSR.[S]	O88291 [126-138]
P09411	[R].VDFNVPMK.[N]	P09411 [23-30]
Q8BFZ3; P60710; P68134	[R-].HQGVMVGMGQK.[D]	Q8BFZ3 [41-51]; P60710 [40-50]; P68134 [42-52]
Q99LC5	[R].LGGEVSCLVAGTK.[C]	Q99LC5 [47-59]
Q80X90	[R].DAGYGGISLAVEGPSK.[V]	Q80X90 [2029-2044]
P20029	[K].MKETAEAYLGK.[K]	P20029 [154-164]
Q3V117	[K].AKPAMPQDSVPSPR.[S]	Q3V117 [470-483]
Q6IFX2; Q9EQD6; Q61781	[KR].DYSPYFK.[T]	Q6IFX2 [140-146]; Q9EQD6 [159-165]; Q61781 [167-173]
P08730; P19001; Q9QWL7	[R].LASYLDKVR.[A]	P08730 [107-115]; P19001 [94-102]; Q9QWL7 [95-103]
P50446; Q8BGZ7; Q8VED5	[R].AEAESWYQTK.[Y]	P50446 [339-348]; Q8BGZ7 [337-346]; Q8VED5 [327-336]
A2AFQ2	[R].LVAGEMGQNEPDQGGQR.[G]	A2AFQ2 [141-157]
Q3UAD6	[K].GVVDSDDLPLNVSR.[E]	Q3UAD6 [435-448]
E9PUX4	[R].YYPTEDVPR.[K]	E9PUX4 [123-131]
Q80X90	[R].SSTETCYSAIPK.[S]	Q80X90 [2496-2507]
Q9QWL7	[R].GQVGGEINVEMDAAPGVDLSR.[I]	Q9QWL7 [231-251]
P07356	[K].TPAQYDASELK.[A]	P07356 [105-115]
Q3UIF3	[R].ELISNSSDALDK.[I]	Q3UIF3 [47-58]
Q9JHU4	[R].FTQDTQPHYIYSPR.[E]	Q9JHU4 [2782-2795]
Q8C2Q3	[R].TQSSASLAASYAAQQHPQAAASYR.[G]	Q8C2Q3 [518-541]
P05214	[K].YMACCMLYR.[G]	P05214 [312-320]
Q9ERK4	[K].IIIPEIQK.[V]	Q9ERK4 [825-832]
A2AFQ0	[R].EVLQNQLGIRPPTR.[S]	A2AFQ0 [2984-2997]
P11499	[R].YHTSQSGDEMTSLSEYVSR.[M]	P11499 [457-475]
Q3UIT2	[K].QVCEIIESPLFLK.[L]	Q3UIT2 [138-150]
P16125	[K].SADTLWDIQK.[D]	P16125 [320-329]
Q9JHU4	[R].AATSPALFNR.[C]	Q9JHU4 [3077-3086]
A0A0A0MQA5	[K].DVNAAIAAIK.[T]	A0A0A0MQA5 [356-365]
Q9QYJ3	[R].EALCGCTVNVPTLDGR.[T]	Q9QYJ3 [264-279]
Q61990; P60335	[R].ESTGAQVQVAGDMLPNSTER.[A]	Q61990 [125-144]; P60335 [125-144]
E9Q557	[R].LQSLTENLTK.[E]	E9Q557 [1718-1727]
P68373; A0A0A0MQA5	[R].EDMAALEK.[D]	P68373 [423-430]; A0A0A0MQA5 [452-459]
Q3TXK6	[K].SFQQELDAR.[H]	Q3TXK6 [41-49]
Q8C2Q3; F7BGR7	[K].IFVGNVSAACTSQELR.[S]	Q8C2Q3 [81-96]; F7BGR7 [81-96]
P62830	[K].ECADLWPR.[I]	P62830 [124-131]
P50247	[K].VPAINVNDSVTK.[S]	P50247 [175-186]
P24547	[K].VAQGVSGAVQDK.[G]	P24547 [439-450]
Q8C196	[K].IMGTSPLQIDR.[A]	Q8C196 [1075-1085]
Q8BTM8	[K].DAGEGGLSLAIEGPSK.[A]	Q8BTM8 [1892-1907]
A0T1J8	[K].SMSDVSAEDVQNLR.[Q]	A0T1J8 [652-665]
P60710; P68134	[KR].DSYVGDEAQSK.[RT]	P60710 [51-61]; P68134 [53-63]
P09411	[R].GCITIIGGGDTATCCAK.[W]	P09411 [366-382]
Q61781; Q9QWL7	[R].ALEEANTELEVK.[I]	Q61781 [141-152]; Q9QWL7 [104-115]
P52480	[K].CCSGAIIVLTK.[S]	P52480 [423-433]
I6L985	[K].VTCVVVDISK.[D]	I6L985 [281-290]
E9PYL9	[K].VLEQLTGQTPVFSK.[A]	E9PYL9 [39-52]
Q8BTM8	[R].IANLQTDLSDGLR.[L]	Q8BTM8 [64-76]
P97351	[K].TTDGYLLR.[L]	P97351 [129-136]
F6VW30; P63101; Q5SS40	[R].NLLSVAYK.[N]	F6VW30 [100-107]; P63101 [42-49]; Q5SS40 [43-50]
P35700	[R].LVQAFQFTDK.[H]	P35700 [159-168]
P58252	[R].CLYASVLTAQPR.[L]	P58252 [728-739]
Q08943	[K].ADVIQATGDAICIFR.[E]	Q08943 [189-203]
P52480	[K].ITLDNAYMEK.[C]	P52480 [142-151]
B9EIU1	[K].VIDPVAPR.[Y]	B9EIU1 [499-506]
P60710; P68134	[K].EITALAPSTMK.[I]	P60710 [316-326]; P68134 [318-328]
P19096	[K].LSPDAIPGK.[W]	P19096 [1576-1584]
P17751	[R].IIYGGSVTGATCK.[E]	P17751 [257-269]
Q80X90	[K].LDVTILSPSR.[K]	Q80X90 [977-986]
B2RQC6	[R].VNEISVEVDSDPR.[A]	B2RQC6 [2188-2200]
Q3UXQ6	[K].FDTGNLCMVTGGANLGR.[I]	Q3UXQ6 [175-191]
P63101	[K].GIVDQSQQAYQEAFEISK.[K]	P63101 [140-157]
Q9JHU4	[R].QDLADVVQVCEGK.[K]	Q9JHU4 [4427-4439]
Q80X90	[K].ANEPTHFTVDCTEAGEGDVSVGIK.[C]	Q80X90 [759-782]
P18760	[R].YALYDATYETK.[E]	P18760 [82-92]
Q04447	[R].GTGGVDTAAVGGVFDVSNADR.[L]	Q04447 [321-341]
G5E8N5; P16125	[R].VIGSGCNLDSAR.[F]	G5E8N5 [187-198]; P16125 [159-170]
P06745	[R].FAAYFQQGDMESNGK.[Y]	P06745 [348-362]
A2AFQ0	[R].SAATSGAGSTTSGVVSGSLGSR.[E]	A2AFQ0 [1844-1865]
Q3UVI9	[K].IPPPVIMVQNVSFK.[Y]	Q3UVI9 [396-409]
Q3UIF3	[R].YYTSASGDEMVSLKDYCTR.[M]	Q3UIF3 [466-484]
Q6ZQ08	[R].SLLEVVVLSR.[N]	Q6ZQ08 [1640-1649]
G5E8N5	[K].SADTLWGIQK.[E]	G5E8N5 [348-357]
Q8BTM8	[R].GAGTGGLGLAVEGPSEAK.[M]	Q8BTM8 [1382-1399]
Q9QWL7	[R].GQVGGEINVEMDAAPGVDLSR.[I]	Q9QWL7 [231-251]
Q3UCL7	[R].ELAEDGYSGVEVR.[V]	Q3UCL7 [28-40]
P97350	[R].SPNQNVQQAAAGALR.[N]	P97350 [299-313]
P63037	[R].TIVITSHPGQIVK.[H]	P63037 [284-296]
P24547	[R].TSSAQVEGGVHSLHSYEK.[R]	P24547 [494-511]
Q8C1B2	[R].YTMGSHGMR.[R]	Q8C1B2 [596-604]
Q61781; Q9QWL7	[K].SEISELR.[R]	Q61781 [335-341]; Q9QWL7 [298-304]
Q80X90	[K].SPFEVQVGPEAGMQK.[V]	Q80X90 [537-551]
P63038	[R].GYISPYFINTSK.[G]	P63038 [222-233]
Q8BTM8	[K].GLVEPVDVVDNADGTQTVNYVPSR.[E]	Q8BTM8 [1492-1515]
P58252	[K].STLTDSLVCK.[A]	P58252 [33-42]
Q8BTM8	[K].YNDQHIPGSPFTAR.[V]	Q8BTM8 [1938-1951]
Q58EU8	[K].DSTYSMSSTLTLTKDEYER.[H]	Q58EU8 [195-213]
P05214	[K].YMACCMLYR.[G]	P05214 [312-320]
O88892	[R].DSEIMQQKQKIANEK.[K]	O88892 [40-54]
P17879	[K].NQVALNPQNTVFDAK.[R]	P17879 [57-71]
Q9JHU4	[R].VLLTTQGVDMISK.[M]	Q9JHU4 [4328-4340]
B2RTM0	[R].ISGLIYEETR.[G]	B2RTM0 [47-56]
Q3UIF3	[R].NPDDITNEEYGEFYK.[S]	Q3UIF3 [301-315]
P09411	[R].AHSSMVGVNLPQK.[A]	P09411 [172-184]
Q80X50	[R].DGSLASNPYSGDLTK.[F]	Q80X50 [870-884]
Q3UA81	[K].EVSTYIK.[K]	Q3UA81 [173-179]
Q9ERK4	[R].AADEEAFEDNSEEYIR.[R]	Q9ERK4 [356-371]
B9EHN0	[K].DNPGVVTCLDEAR.[H]	B9EHN0 [227-239]
Q80TM2	[K].AVAAGNSCR.[Q]	Q80TM2 [2212-2220]
Q9DB79	[K].CPFTGNVSIR.[G]	Q9DB79 [60-69]
G5E8N5	[K].LVIITAGAR.[MQL]	G5E8N5 [120-128]
Q922F4	[R].AALVDLEPGTMDSVR.[S]	Q922F4 [63-77]
Q8BTM8	[K].TGVAVNKPAEFTVDAK.[H]	Q8BTM8 [685-700]
P63017	[K].TVTNAVVTVPAYFNDSQR.[QL]	P63017 [138-155]
B2RQC6	[R].MAEIGEHVAPSEAANSLEQAQAAAER.[L]	B2RQC6 [522-547]
P50446	[R].TAAENEFVTLKK.[D]	P50446 [250-261]
Q9ERD7	[K].EVDEQMLAIQSK.[N]	Q9ERD7 [325-336]
Q8R4B4	[R].VMLGETNPADSKPGTIR.[G]	Q8R4B4 [89-105]
P58252	[K].EDLYLKPIQR.[T]	P58252 [440-449]
P31254	[R].YDGQVAVFGSDLQEK.[L]	P31254 [450-464]
P63017	[K].NSLESYAFNMK.[A]	P63017 [540-550]
O88738	[K].LQTDSNSWDEHVFELVLPK.[A]	O88738 [1083-1101]
P27661	[R].AGLQFPVGR.[VI]	P27661 [22-30]
P50446	[R].TAAENEFVTLK.[K]	P50446 [250-260]
Q58A65	[R].EVENLILENTQLLETK.[N]	Q58A65 [409-424]
Q61765; Q6IFX2; Q497I4; Q9EQD6; P08730; P02535; P19001; Q61781; Q9QWL7	[RK].LAADDFR.[TLVMS]	Q61765 [136-142]; Q6IFX2 [174-180]; Q497I4 [177-183]; Q9EQD6 [193-199]; P08730 [177-183]; P02535 [227-233]; P19001 [163-169]; Q61781 [201-207]; Q9QWL7 [164-170]
B2CSK2	[K].NQVAMNPQNTVFDAK.[R]	B2CSK2 [59-73]
Q3UIF3	[R].YYTSASGDEMVSLK.[D]	Q3UIF3 [466-479]
Q61699	[R].GPFELEAFYSDPQGVPYPEAK.[I]	Q61699 [438-458]
P50446; Q6IME9; Q32P04	[K].DVDAAYMNK.[V]	P50446 [262-270]; Q6IME9 [244-252]; Q32P04 [272-280]
A6ZI44	[R].ALANSLACQGK.[Y]	A6ZI44 [386-396]
Q58EU8	[R].FSGSGSGTDFTLK.[I]	Q58EU8 [87-99]
A0A077S9N1	[R].STDYGIFQINSR.[Y]	A0A077S9N1 [69-80]
Q497E9	[K].ISSLLEEQFQQGK.[L]	Q497E9 [158-170]
Q3TL71	[R].TDYNASVSVPDSSGPER.[IY]	Q3TL71 [70-86]
E9Q557	[R].LLQLQEQMR.[A]	E9Q557 [154-162]
Q9QWL7	[R].GQVGGEINVEMDAAPGVDLSR.[I]	Q9QWL7 [231-251]
B2CSK2; P17879	[K].NALESYAFNMK.[S]	B2CSK2 [542-552]; P17879 [540-550]
B2RQC6	[R].VLGTSPEAIDSAENR.[F]	B2RQC6 [1034-1048]
P52431	[R].IDISQLVITK.[E]	P52431 [874-883]
Q3UE92	[R].QEALEWLIR.[E]	Q3UE92 [649-657]
P50446; Q8BGZ7; Q6IFZ8	[K].YEELQVTAGR.[H]	P50446 [349-358]; Q8BGZ7 [347-356]; Q6IFZ8 [349-358]
Q6IFX2; Q61781; Q9QWL7	[R].MSVEADINGLRR.[V]	Q6IFX2 [191-202]; Q61781 [218-229]; Q9QWL7 [181-192]
Q6ZQK2	[R].QSGQTDPLQKEEVQAGVDAANSAAQQYQR.[R]	Q6ZQK2 [383-411]
P97355	[R].LILDLSMK.[V]	P97355 [297-304]
P58252	[R].ETVSEESNVLCLSK.[S]	P58252 [581-594]
P20029; B7U582; P63017; B2CSK2; P17879	[RK].VEIIANDQGNR.[IT]	P20029 [51-61]; B7U582 [27-37]; P63017 [26-36]; B2CSK2 [28-38]; P17879 [26-36]
Q3U4S9	[R].IEGLLAAFPK.[L]	Q3U4S9 [29-38]
P60710	[K].LCYVALDFEQEMATAASSSSLEK.[SG]	P60710 [216-238]
Q9DB79	[K].NMSVHLSPCFR.[D]	Q9DB79 [108-118]
P40142	[R].IIALDGDTK.[N]	P40142 [335-343]
B2RQH0	[R].QEPSDSPMFIINR.[K]	B2RQH0 [201-213]
Q3UA81	[K].STTTGHLIYK.[C]	Q3UA81 [21-30]
P11499	[R].DNSTMGYMMAK.[K]	P11499 [613-623]
P60710	[-R].GYSFTTTAER.[E]	P60710 [197-206]
P68373; A0A0A0MQA5	[K].YMACCLLYR.[G]	P68373 [312-320]; A0A0A0MQA5 [341-349]
Q3UIF3	[K].DQVANSAFVER.[L]	Q3UIF3 [501-511]
Q9JHU4	[R].LGEDLNKWQALLVQIR.[K]	Q9JHU4 [1070-1085]
Q8C1B2	[K].LSTELFQDK.[S]	Q8C1B2 [207-215]
E9Q557	[R].QLQNIIQATSR.[E]	E9Q557 [283-293]
Q6IFX2; Q61781; Q9QWL7	[R].MSVEADINGLR.[R]	Q6IFX2 [191-201]; Q61781 [218-228]; Q9QWL7 [181-191]
Q69Z43	[R].LGINLLGGPLGGK.[Q]	Q69Z43 [659-671]
Q62261	[R].DVEDEILWVGER.[M]	Q62261 [1493-1504]
P07742	[R].YVDQGGNK.[R]	P07742 [285-292]
P27773	[K].VDCTANTNTCNK.[Y]	P27773 [83-94]
Q9WV02	[R].IVEVLLMK.[D]	Q9WV02 [34-41]
P11499	[K].EQVANSAFVER.[V]	P11499 [492-502]
Q8C1B2	[K].KASYSHNFSK.[K]	Q8C1B2 [568-577]
A0A0A0MQF6	[K].VIPELNGK.[L]	A0A0A0MQF6 [244-251]
Q3UIF3; P11499	[K].YIDQEELNK.[T]	Q3UIF3 [285-293]; P11499 [276-284]
Q32P04	[R].TTAENEFVMLKK.[D]	Q32P04 [260-271]
Q9EPL8	[K].LLEVIILQCK.[G]	Q9EPL8 [741-750]
Q9EQD6	[R].GQTGGDVNVEMDAAPGVDLSR.[I]	Q9EQD6 [260-280]
Q9EQD6	[K].ASLENSLEETK.[G]	Q9EQD6 [351-361]
P63038	[K].LVQDVANNTNEEAGDGTTTATVLAR.[S]	P63038 [97-121]
Q9QWL7	[R].TMQALEIELQSQLSMK.[A]	Q9QWL7 [306-321]
Q6PDI5	[R].QAMTSIWNALVTDK.[S]	Q6PDI5 [1135-1148]
Q9JK88	[KR].LVLVNAIYFK.[G]	Q9JK88 [177-186]
E9Q557	[R].AVTGYNDPETGNIISLFQAMNK.[E]	E9Q557 [2347-2368]
B2RTM0	[R].KTVTAMDVVYALK.[R]	B2RTM0 [80-92]
Q80X90	[R].GAGIGGLGITVEGPSESK.[I]	Q80X90 [1355-1372]
Q3UJL7	[R].YQDILVFR.[S]	Q3UJL7 [48-55]
B7U582; P63017	[K].STAGDTHLGGEDFDNR.[M]	B7U582 [224-239]; P63017 [221-236]
Q61781; Q9QWL7	[R].EVATNSELVQSGK.[S]	Q61781 [322-334]; Q9QWL7 [285-297]
Q6IFX2; Q61781; Q9QWL7	[R].MSVEADINGLR.[R]	Q6IFX2 [191-201]; Q61781 [218-228]; Q9QWL7 [181-191]
Q32P04	[R].TTAENEFVMLK.[K]	Q32P04 [260-270]
Q149Z9	[K].GTGASGSFK.[L]	Q149Z9 [99-107]
P58252	[R].CELLYEGPPDDEAAMGIK.[S]	P58252 [369-386]
Q8C1A5	[K].FYLDLYPR.[E]	Q8C1A5 [411-418]
Q3UA81	[K].QLIVGVNK.[M]	Q3UA81 [147-154]
Q6P9R2	[K].IPISLVLR.[L]	Q6P9R2 [432-439]
Q9JIK9	[R].LPLFGLGR.[L]	Q9JIK9 [71-78]
Q8C1W9	[K].SEPDKADPFSFEGPEIVDCDGCTIDWK.[K]	Q8C1W9 [229-255]
Q6P5E4	[R].DFNLDGAPYGYTPFCDSR.[R]	Q6P5E4 [1372-1389]
Q9EQD6	[R].GQTGGDVNVEMDAAPGVDLSR.[I]	Q9EQD6 [260-280]
Q8BTM8	[R].AVPTGDASK.[C]	Q8BTM8 [1636-1644]
O70569	[R].IEDVTPIPSDSTR.[R]	O70569 [129-141]
Q3UNM8	[R].EGFLDTLVVLHR.[A]	Q3UNM8 [82-93]
Q9CWK0	[K].CMQLTDFILK.[F]	Q9CWK0 [54-63]
P58252	[R].GGGQIIPTAR.[R]	P58252 [717-726]
Q5SWU9	[R].LLLEDLVK.[K]	Q5SWU9 [2221-2228]
A2AGT5	[R].DAAFEALGTALK.[V]	A2AGT5 [457-468]
B2RTP7	[K].VDPEIQNVK.[S]	B2RTP7 [188-196]
E9Q634	[K].APESLFLLEEMR.[E]	E9Q634 [680-691]
Q32P04	[K].YEELQQTAGR.[H]	Q32P04 [359-368]
P11679	[R].SNMDNMFESYINNLR.[R]	P11679 [140-154]
D3Z7Q5	[R].NSILAQVLDQSAR.[A]	D3Z7Q5 [120-132]
E9QPD7	[R].GLAPVQAYLHIPDIIK.[V]	E9QPD7 [90-105]
B7U582; P63017; B2CSK2; P17879	[R].TTPSYVAFTDTER.[L]	B7U582 [38-50]; P63017 [37-49]; B2CSK2 [39-51]; P17879 [37-49]
P11499	[R].NPDDITQEEYGEFYK.[S]	P11499 [292-306]
E9QAQ5	[R].DIKPQNLLLDPDTAVLK.[L]	E9QAQ5 [181-197]
P62717	[R].DLTTAGAVTQCYR.[D]	P62717 [99-111]
P38647	[K].SDIGEVILVGGMTR.[M]	P38647 [378-391]
P19096	[K].VGDPQELNGITR.[S]	P19096 [299-310]
I6L985	[K].APQVYTIPPPK.[E]	I6L985 [367-377]
Q9QWL7	[K].ATMQNLNDR.[L]	Q9QWL7 [86-94]
A6ZI44	[K].GVVPLAGTNGETTTQGLDGLSER.[C]	A6ZI44 [166-188]
P56399	[R].DGLGGLPDIVR.[D]	P56399 [134-144]
Q5SWU9	[R].LPGGNEIGMVAWK.[M]	Q5SWU9 [1650-1662]
P02535	[K].QSLEASLAETEGR.[Y]	P02535 [385-397]
Q9JMK2	[K].GYPSEFSTYLNFCR.[S]	Q9JMK2 [243-256]
Q32P04	[R].LRSEIDNVK.[K]	Q32P04 [390-398]
P60710; P68134	[K].AGFAGDDAPR.[A]	P60710 [19-28]; P68134 [21-30]
B2RWW6	[R].QSVVVLMGSLAK.[H]	B2RWW6 [1317-1328]
Q542I9	[R].VAEEHAPSIVFIDEIDAIGTK.[R]	Q542I9 [273-293]
Q3UA81	[R].LPLQDVYK.[I]	Q3UA81 [248-255]
Q7TMM9; P99024; P68372	[K].EVDEQMLNVQNK.[N]	Q7TMM9 [325-336]; P99024 [325-336]; P68372 [325-336]
P42128	[R].EFEFLMR.[Q]	P42128 [99-105]
O88569	[R].GFGFVTFDDHDPVDK.[I]	O88569 [154-168]
P60710; P68134	[K].EITALAPSTMK.[I]	P60710 [316-326]; P68134 [318-328]
Q8VDC3	[K].GPFLLGIK.[A]	Q8VDC3 [796-803]
Q8R1G2	[R].NLIEWLNK.[Y]	Q8R1G2 [236-243]
Q62261	[R].LTTLELLEVR.[R]	Q62261 [2079-2088]
O08582	[K].STLLGVLTHGELDNGR.[G]	O08582 [174-189]
Q3THQ5	[K].LLEFQLALK.[D]	Q3THQ5 [407-415]
Q8BFZ3; P60710; P68134	[R].DLTDYLMK.[I]	Q8BFZ3 [185-192]; P60710 [184-191]; P68134 [186-193]
Q8BTM8	[R].RLTVSSLQESGLK.[V]	Q8BTM8 [2334-2346]
B1AR51	[K].TLEDNLLSR.[L]	B1AR51 [3616-3624]
Q32P04	[R].VDALMDEINFMK.[M]	Q32P04 [287-298]
Q7TMM9; Q9D6F9; Q9ERD7; P99024; P68372; Q922F4	[K].NMMAACDPR.[H]	Q7TMM9 [298-306]; Q9D6F9 [298-306]; Q9ERD7 [298-306]; P99024 [298-306]; P68372 [298-306]; Q922F4 [298-306]
O88738	[K].GYSLASLLAK.[V]	O88738 [1261-1270]
P52480	[R].GDLGIEIPAEK.[V]	P52480 [295-305]
Q6ZQ08	[R].GNAPEGLPQLMEVVR.[S]	Q6ZQ08 [1799-1813]
P70398	[K].LPPVLAIQLK.[R]	P70398 [1789-1798]
Q80TM2	[K].AVAEQIPLLVQGVR.[G]	Q80TM2 [981-994]
	[R].AVMVDLEPTVVDEVR.[A]
Q3UUU2	[R].FAVGIVIGR.[N]	Q3UUU2 [281-289]
Q3UDE2	[K].YIESPVLFLR.[E]	Q3UDE2 [447-456]
P62301	[K].GLAPDLPEDLYHLIK.[K]	P62301 [79-93]
Q3UIF3; P11499	[R].TLTIVDTGIGMTK.[A]	Q3UIF3 [88-100]; P11499 [83-95]
Q7TSV9	[R].ELVLLPAGADSLR.[A]	Q7TSV9 [301-313]
P47856	[R].EILETLIK.[G]	P47856 [18-25]
Q3THG2	[K].LYDNLLEQNLIR.[V]	Q3THG2 [326-337]
P52480	[R].AEGSDVANAVLDGADCIMLSGETAK.[G]	P52480 [343-367]
P70398	[K].LYSVVSQLIR.[C]	P70398 [2228-2237]
Q9JHU4	[K].MVVLSLPR.[I]	Q9JHU4 [989-996]
Q6IFX2; Q61781	[R].GQVGGDVNVEMDAAPGVDLSR.[I]	Q6IFX2 [241-261]; Q61781 [268-288]
A3KGU9	[R].ELPTAFDYVEFTR.[S]	A3KGU9 [2481-2493]
Q61699	[K].KPVTDCVISVPSFFTDAER.[R]	Q61699 [135-153]
Q6ZQK2	[K].LGLAPQIQDLYGKVDFTEEEINNMK.[I]	Q6ZQK2 [186-210]
Q7TQG1	[R].YIDLEPDTPLSPEELK.[E]	Q7TQG1 [1055-1070]
P70398	[R].WVVPVLPK.[G]	P70398 [84-91]
Q9QYJ3	[R].NPFDTFFGQR.[N]	Q9QYJ3 [110-119]
P29341	[K].FSPAGPILSIR.[V]	P29341 [31-41]
A0A087WQS2	[R].LMELFPANK.[Q]	A0A087WQS2 [247-255]
Q9D6F9; P99024; P68372	[K].EAESCDCLQGFQLTHSLGGGTGSGMGTLLISK.[I]	Q9D6F9 [123-154]; P99024 [123-154]; P68372 [123-154]
Q9WTP6	[K].NGFLLDGFPR.[T]	Q9WTP6 [94-103]
A2AFQ0	[R].LYIVFEGEEGQDAGGLLR.[E]	A2AFQ0 [4050-4067]
Q9QUM9	[K].LLDSSTVTHLFK.[I]	Q9QUM9 [60-71]
Q69ZR2	[K].IFLDESAPDNVLEVTAR.[A]	Q69ZR2 [60-76]
P63038	[R].GVMLAVDAVIAELKK.[Q]	P63038 [143-157]
Q3U111	[R].VTTMDAELEFAIQPNTTGK.[Q]	Q3U111 [88-106]
Q6PAR5	[K].QLGFQETAYGEFLSR.[L]	Q6PAR5 [88-102]
Q8R1B4	[K].ELLGQGLLLR.[S]	Q8R1B4 [642-651]
Q6A0A9	[K].SPQTPELVEALAFR.[E]	Q6A0A9 [650-663]
P97298	[R].DTDTGALLFIGR.[I]	P97298 [399-410]
P52480	[R].NTGIICTIGPASR.[S]	P52480 [44-56]
F8WHL2	[R].TLDLPIYVTR.[V]	F8WHL2 [572-581]
Q8C605	[R].NESCSVNYTTDFIYQLYSEEGK.[G]	Q8C605 [637-658]
P63017	[K].DAGTIAGLNVLR.[I]	P63017 [160-171]
Q6ZPT2	[R].WQFLTLR.[E]	Q6ZPT2 [254-260]
H3BJQ7	[K].VNLAELFK.[G]	H3BJQ7 [75-82]
Q68FF6	[R].SAVPFLPVNPEYSATR.[N]	Q68FF6 [319-334]
Q6IFX2	[R].TKYETELNLR.[M]	Q6IFX2 [181-190]
Q61782	[R].LLEGEDAHLSSSQFSSGSQSSR.[D]	Q61782 [40-61]
Q5DTQ4	[R].FQPLLDGLK.[S]	Q5DTQ4 [316-324]
O70194	[R].DNSDFDLLTVSETANEPPQDEGNSFNSPR.[N]	O70194 [282-310]
Q61753	[K].EELIAELQDCEGLIVR.[S]	Q61753 [39-54]
Q8BTM8	[K].LQVEPAVDTSGVQCYGPGIEGQGVFR.[E]	Q8BTM8 [1247-1272]
Q8VED5; P11679; Q32P04	[K].NKYEDEINKR.[T]	Q8VED5 [228-237]; P11679 [183-192]; Q32P04 [250-259]
Q6IFX2; Q9EQD6; P08730; Q61782; P19001; Q61781; Q9QWL7	[R].LEQEIATYR.[RSN]	Q6IFX2 [387-395]; Q9EQD6 [406-414]; P08730 [390-398]; Q61782 [30-38]; P19001 [376-384]; Q61781 [414-422]; Q9QWL7 [377-385]
Q8VDD5	[KR].TQLEELEDELQATEDAK.[L]	Q8VDD5 [1539-1555]
Q3UA53	[R].LKPGYLEATVDWFR.[R]	Q3UA53 [178-191]
Q8BFY9	[K].GELQNWPDLLPK.[L]	Q8BFY9 [129-140]
P07742	[R].DFSYNYFGFK.[T]	P07742 [140-149]
Q3UA81	[K].IGGIGTVPVGR.[V]	Q3UA81 [256-266]
Q8R1B4	[K].VWDLFPEADKVR.[T]	Q8R1B4 [763-774]
Q8C196	[K].VLILGSGGLSIGQAGEFDYSGSQAVK.[A]	Q8C196 [425-450]
Q9CQU0	[R].ILFLDPSGK.[V]	Q9CQU0 [113-121]
E9QNP0	[K].TITLEVEPSDTIENVK.[A]	E9QNP0 [116-131]
Q9JHU4	[R].LFLTMEINPK.[V]	Q9JHU4 [4122-4131]
P58252	[KR].GLKEGIPALDNFLDK.[L]	P58252 [843-857]
Q920Q6	[R].GFGFVTFADPASVDK.[V]	Q920Q6 [63-77]
Q9DBF1	[R].VNLLSFTGSTQVGK.[E]	Q9DBF1 [267-280]
Q7TMM9; Q9D6F9; Q9ERD7; P99024; P68372; Q922F4	[K].NMMAACDPR.[H]	Q7TMM9 [298-306]; Q9D6F9 [298-306]; Q9ERD7 [298-306]; P99024 [298-306]; P68372 [298-306]; Q922F4 [298-306]
P20152	[K].ILLAELEQLK.[G]	P20152 [130-139]
Q62261	[R].LVSQDNFGFDLPAVEAATK.[K]	Q62261 [444-462]
Q6P5F9	[K].YVVGLIIK.[T]	Q6P5F9 [105-112]
P70124	[K].ILVVNAAYFVGK.[W]	P70124 [159-170]
B2RTP7	[R].DYQELMNTK.[L]	B2RTP7 [483-491]
E9QB02	[K].NNSELLNNLGNFINR.[A]	E9QB02 [644-658]
Q3TKG4	[R].VDILDPALLR.[S]	Q3TKG4 [398-407]
B2RWW6	[R].VVLPYLVPK.[L]	B2RWW6 [2075-2083]
P97313	[K].GLSSLLCNFTK.[S]	P97313 [226-236]
Q58EU8	[K].TSTSPIVK.[S]	Q58EU8 [225-232]
B2CSK2	[K].AFYPEEISSMVLTK.[M]	B2CSK2 [115-128]
P17879	[R].SFFPEEISSMVLTK.[MI]	P17879 [113-126]
Q9QUM9	[R].ILTEAEIDAHLVALAER.[D]	Q9QUM9 [229-245]
Q5SWU9	[K].VNNADDFPNLFR.[Q]	Q5SWU9 [323-334]
Q3UJP8	[K].MLNIHPSLLPSFK.[G]	Q3UJP8 [911-923]
Q8R1B4	[R].FEELTNLIR.[T]	Q8R1B4 [57-65]
Q9CZD3	[K].LPFAAAQIGNSFR.[N]	Q9CZD3 [309-321]
Q80U89	[K].WLLLTGISAQQNR.[V]	Q80U89 [174-186]
Q6ZQK2	[K].NVIFEIGPTEEVGDFEVK.[A]	Q6ZQK2 [1611-1628]
Q99K87	[R].YYGGAEVVDEIELLCQR.[R]	Q99K87 [105-121]
P08730; P19001	[R].TLQGLEIELQSQLSMK.[A]	P08730 [319-334]; P19001 [305-320]
Q80U89	[R].RKDPELWGSVLLESNPYR.[R]	Q80U89 [960-977]
Q9QWL7	[K].GSSGLGGGSSR.[T]	Q9QWL7 [16-26]
Q8VCG1	[R].GNVGVVLFNFGK.[E]	Q8VCG1 [143-154]
Q6P5F9	[K].LLSEEVFDFSSGQITQVK.[A]	Q6P5F9 [173-190]
A2AFQ0	[KR].SLLSILQR.[AWS]	A2AFQ0 [3226-3233]
Q8BMK0	[K].LPLSGLTEGVGMTR.[N]	Q8BMK0 [117-130]
Q80TM2	[R].DPVQLNLLYVQAR.[D]	Q80TM2 [231-243]
F8WHL2	[R].GITGVDLFGTTDAVVK.[H]	F8WHL2 [183-198]
P80315	[R].AYILNLVK.[Q]	P80315 [281-288]
P48036	[R].SEIDLFNIR.[K]	P48036 [275-283]
Q9JI10	[K].LADFGVAGQLTDTMAK.[R]	Q9JI10 [162-177]
P70124	[K].IIELPFQNK.[H]	P70124 [216-224]
A2AFQ0	[K].QIGTLLAELR.[E]	A2AFQ0 [3639-3648]
Q3TFA9	[K].ILPVFDEPPNPTNVEESLKR.[I]	Q3TFA9 [173-192]
Q9EQD6	[R].GQTGGDVNVEMDAAPGVDLSR.[I]	Q9EQD6 [260-280]
Q6P5F9	[R].IYLDMLNVYK.[C]	Q6P5F9 [713-722]
A2AFQ0	[R].RPVMLTLLR.[V]	A2AFQ0 [1676-1684]
B2RQC6	[R].MALLATVLGR.[F]	B2RQC6 [2215-2224]
P23116	[R].LATLLGLQAPPTR.[I]	P23116 [355-367]
Q6IFZ8	[K].TLNNRFASFIDK.[V]	Q6IFZ8 [158-169]
Q9D8N0	[R].WFLTCINQPQFR.[A]	Q9D8N0 [190-201]
Q61553	[R].SSYDVFQLEFNDGAYNIK.[D]	Q61553 [409-426]
P20029	[K].DNHLLGTFDLTGIPPAPR.[G]	P20029 [476-493]
Q99NB8	[K].AQQDQLVLIFAGK.[I]	Q99NB8 [47-59]
P38647	[K].STNGDTFLGGEDFDQALLR.[H]	P38647 [266-284]
Q8C605	[R].TFVLEVMGR.[H]	Q8C605 [210-218]
Q6ZQ58	[R].YGLECLFR.[YF]	Q6ZQ58 [926-933]
Q8CGC4	[K].SFFDNISSELK.[T]	Q8CGC4 [317-327]
F8WHT3	[R].LLSFSPEEFPTLK.[A]	F8WHT3 [164-176]
P11983	[K].FATEAAITILR.[I]	P11983 [516-526]
Q9JHU4	[K].NVHLAPGWLMQLEK.[K]	Q9JHU4 [4096-4109]
Q11011	[K].LNLGTVGFYR.[T]	Q11011 [582-591]
Q11011	[K].ATFDISLVVPK.[D]	Q11011 [199-209]
A0A0A0MQF6	[R].VIISAPSADAPMFVMGVNHEK.[Y]	A0A0A0MQF6 [143-163]
P63037	[K].VNFPENGFLSPDKLSLLEK.[L]	P63037 [326-344]
Q3UJI2	[K].TVALWDLR.[N]	Q3UJI2 [296-303]
P24270	[R].GPLLVQDVVFTDEMAHFDR.[E]	P24270 [48-66]
Q80TM2	[K].SNTSPEELGPLANQLTSDYGR.[L]	Q80TM2 [1898-1918]
P68373; A0A0A0MQA5	[K].YMACCLLYR.[G]	P68373 [312-320]; A0A0A0MQA5 [341-349]
Q9QY23	[R].ILNPLLDR.[V]	Q9QY23 [656-663]
Q6PDI5	[K].ELCSLASDLSQPDLVYK.[F]	Q6PDI5 [1063-1079]
A2AFQ0	[R].ELQLPSMSMLTSK.[T]	A2AFQ0 [3706-3718]
Q9EPL8	[K].EYNEFAEVFLK.[A]	Q9EPL8 [284-294]
Q3U3N7	[K].AIDLFTDAIK.[L]	Q3U3N7 [132-141]
Q9DBP5	[K].FLIDGFPR.[N]	Q9DBP5 [89-96]
Q571M2	[R].NFTTEQVTAMLLSK.[L]	Q571M2 [199-212]
G3UXL2	[R].THNGESVSYLFSHVPL.[-]	G3UXL2 [303-318]
Q9JHU4	[K].TMTLFSALR.[A]	Q9JHU4 [2600-2608]
P70398	[K].FNDYFEFPR.[E]	P70398 [1812-1820]
Q7TMM9; Q9D6F9; P99024; P68372	[K].TAVCDIPPR.[G]	Q7TMM9 [351-359]; Q9D6F9 [351-359]; P99024 [351-359]; P68372 [351-359]
P70168	[K].SDFDMVDYLNELR.[E]	P70168 [750-762]
Q76MZ3	[K].SEIIPMFSNLASDEQDSVR.[L]	Q76MZ3 [203-221]
Q8C1B2	[R].LIEEANSR.[G]	Q8C1B2 [368-375]
P08249	[K].TIIPLISQCTPK.[V]	P08249 [204-215]
Q3THQ5	[K].LMDVGLIAIR.[-]	Q3THQ5 [534-543]
Q9D0I9	[R].LNDYIFSFDK.[M]	Q9D0I9 [513-522]
Q3UIF3; P11499	[K].ADLINNLGTIAK.[S]	Q3UIF3 [101-112]; P11499 [96-107]
Q9DB79	[R].DVQIGDIVTVGECRPLSK.[T]	Q9DB79 [119-136]
Q8R0W0	[R].LSVEEAVAAGVVGGEIQEK.[L]	Q8R0W0 [2289-2307]; [2804-2822]; [3319-3337]; [3834-3852]; [4349-4367]; [4864-4882]; [5379-5397]; [5894-5912]; [6409-6427]
P62855	[K].LHYCVSCAIHSK.[V]	P62855 [71-82]
Q9CQ65	[K].IGIIGGTGLDDPEILEGR.[T]	Q9CQ65 [12-29]
Q05D44	[R].LKEGDTIIVPGVEGPIVTQIR.[G]	Q05D44 [878-898]
Q8VDD5	[R].IIGLDQVAGMSETALPGAFK.[T]	Q8VDD5 [618-637]
P09103	[R].EADDIVNWLK.[K]	P09103 [123-132]
P70698	[R].GLGLSPDLVVCR.[C]	P70698 [206-217]
Q80TM2	[K].LGAASLGAEDPETQVVLINAVK.[D]	Q80TM2 [2087-2108]
Q542X7	[R].TVYGGGCSEMLMAHAVTQLANR.[T]	Q542X7 [406-427]
B2RTP7	[R].GFSSGSAVVSGGSR.[R]	B2RTP7 [23-36]
Q5F2B4	[R].VGPEGPMGTELGDFLR.[E]	Q5F2B4 [152-167]
P80315	[K].IGLIQFCLSAPK.[T]	P80315 [246-257]
Q6PDI5	[K].QSLIDWNNPAIINK.[M]	Q6PDI5 [283-296]
Q9EPL8	[K].AFAVGVQQVLLK.[V]	Q9EPL8 [295-306]
Q3UDJ7	[R].DLLLDPAWEK.[Q]	Q3UDJ7 [42-51]
P40142	[K].ILATPPQEDAPSVDIANIR.[M]	P40142 [284-302]
Q80TM2	[K].TLSHPQQMALLDQTK.[T]	Q80TM2 [1775-1789]
P63037	[K].NVVHQLSVTLEDLYNGATR.[K]	P63037 [106-124]
Q61553	[K].LINRPIIVFR.[G]	Q61553 [380-389]
Q8BFY9	[R].ATVGILITTIASK.[G]	Q8BFY9 [116-128]
Q564E8	[R].FCIWTESAFR.[K]	Q564E8 [249-258]
Q9D0E1	[R].AFITNIPFDVK.[W]	Q9D0E1 [72-82]
Q9JHU4	[R].EWTDGLFTHVLR.[K]	Q9JHU4 [2272-2283]
Q3U4U6	[K].IGDEYFTFITDCKDPK.[A]	Q3U4U6 [355-370]
P08249	[K].IFGVTTLDIVR.[A]	P08249 [166-176]
Q3UXQ6	[K].GIPHLVTHDAR.[T]	Q3UXQ6 [135-145]
Q76MZ3	[K].LSTIALALGVER.[T]	Q76MZ3 [35-46]
A2AFQ0	[R].NPDIFTEVANCCIR.[I]	A2AFQ0 [1881-1894]
Q80V08	[K].GLDVDSLVIEHIQVNK.[A]	Q80V08 [116-131]
Q9WVA4	[R].TLMNLGGLAVAR.[D]	Q9WVA4 [128-139]
P24270	[R].GPLLVQDVVFTDEMAHFDR.[E]	P24270 [48-66]
P09405	[K].GFGFVDFNSEEDAK.[A]	P09405 [608-621]
Q8BLY1	[K].VISLPELK.[G]	Q8BLY1 [425-432]
Q3UW40	[R].QINWTVLYR.[R]	Q3UW40 [48-56]
Q8VH51	[R].VLGVPIIVQASQAEK.[N]	Q8VH51 [218-232]
Q01853	[K].LADDVDLEQVANETHGHVGADLAALCSEAALQAIR.[K]	Q01853 [390-424]
Q3TJ21	[R].SLLINAVEASCIR.[T]	Q3TJ21 [252-264]
B2CY77	[R].ADHQPLTEASYVNLPTIALCNTDSPLR.[Y]	B2CY77 [129-155]
Q7TMM9; Q9D6F9; Q9ERD7; P99024; P68372	[R].ISEQFTAMFR.[R]	Q7TMM9 [381-390]; Q9D6F9 [381-390]; Q9ERD7 [381-390]; P99024 [381-390]; P68372 [381-390]
Q6ZPT2	[K].TGFFEFQAAK.[D]	Q6ZPT2 [857-866]
B2RQC6	[R].MALLATVLGR.[F]	B2RQC6 [2215-2224]
Q9JHU4	[K].INEWLTLVEK.[E]	Q9JHU4 [1696-1705]
Q8VIJ6	[R].LFVGNLPADITEDEFKR.[L]	Q8VIJ6 [291-307]
Q8VDD5	[K].LQLQEQLQAETELCAEAEELR.[A]	Q8VDD5 [883-903]
Q80X90	[R].DAGYGGISLAVEGPSKVDIQTEDLEDGTCK.[V]	Q80X90 [2029-2058]
Q3UAG2	[K].LVPLLDTGDIIIDGGNSEYRDTTR.[R]	Q3UAG2 [88-111]
Q3TZ32	[K].ASEWVQQVSGLMDGK.[G]	Q3TZ32 [916-930]
P04104	[R].TNAENEFVTIKK.[D]	P04104 [286-297]
Q8BTM8	[R].TFSVWYVPEVTGTHK.[V]	Q8BTM8 [341-355]
Q6IFX2	[R].ALEEANADLEVK.[I]	Q6IFX2 [114-125]
Q80TM2	[R].DKAPGQLECETAIAALNSCLR.[D]	Q80TM2 [1676-1696]
P20029	[R].AKFEELNMDLFR.[S]	P20029 [326-337]
Q545B6	[R].ASGQAFELILSPR.[S]	Q545B6 [15-27]
P70168	[R].HFIMQVVCEATQCPDTR.[V]	P70168 [216-232]
Q9JHU4	[R].WQASSLPADDLCTENAIMLK.[R]	Q9JHU4 [3560-3579]
P07356	[K].WISIMTER.[S]	P07356 [213-220]
A2AFQ0	[R].QLEAEADAIIQMVR.[E]	A2AFQ0 [3769-3782]
P11499	[R].APFDLFENK.[K]	P11499 [339-347]
Q3V117	[K].KHPEVDVLINFASLR.[S]	Q3V117 [562-576]
Q80TM2	[R].DLDQASLAAVSQQLAPR.[E]	Q80TM2 [1697-1713]
Q6ZPT2	[R].FDDPLLGPR.[R]	Q6ZPT2 [1152-1160]
Q8BKC5	[K].ITFLLQAIR.[N]	Q8BKC5 [42-50]
Q8BFY9	[R].FSDQFPLPLK.[E]	Q8BFY9 [880-889]
Q9EQD6; Q61781	[R].QFTSSSSMK.[G]	Q9EQD6 [7-15]; Q61781 [7-15]
Q61753	[K].TLGILGLGR.[I]	Q61753 [147-155]
Q5SWU9	[R].LGGIPVGVVAVETR.[T]	Q5SWU9 [1977-1990]
Q3UJP8	[K].AFAHITGGGLLENIPR.[V]	Q3UJP8 [677-692]
Q80U89	[K].QLPLVKPYLR.[S]	Q80U89 [1453-1462]
Q8JZX9	[K].NAISLPVIGGPQALTLPTAQAPPKPPR.[L]	Q8JZX9 [106-132]
D3YUM8	[R].FGPYYTEPVIAGLDPK.[T]	D3YUM8 [100-115]
Q3UJW9	[K].MPLIGLGTWK.[S]	Q3UJW9 [14-23]
Q9JHU4	[R].TSFLDDAFR.[K]	Q9JHU4 [3610-3618]
P50247	[K].VADIGLAAWGR.[K]	P50247 [9-19]
Q5SUR0	[K].FGEPVLAGFAR.[S]	Q5SUR0 [396-406]
Q6P5F9	[R].EPEVLSTMAIIVNK.[L]	Q6P5F9 [797-810]
P63017	[K].DNNLLGKFELTGIPPAPR.[G]	P63017 [452-469]
E9Q0B5	[R].ISVINGGSK.[A]	E9Q0B5 [1352-1360]
Q9WV02	[R].GFAFVTFESPADAK.[D]	Q9WV02 [50-63]
A2AN08	[R].IIPYLSFGEVEK.[M]	A2AN08 [4616-4627]
Q6ZQ38	[K].ADVFHAYLSLLK.[Q]	Q6ZQ38 [392-403]
A2AFQ0	[K].VPLQGFAALEGMNGIQK.[F]	A2AFQ0 [4310-4326]
P05214; P68373; A0A0A0MQA5	[K].EDAANNYAR.[G]	P05214 [97-105]; P68373 [97-105]; A0A0A0MQA5 [126-134]
Q9CQK2	[K].TTGFGMIYDSLDYAK.[K]	Q9CQK2 [69-83]
B2RWW6	[R].LTSADALRPSVVSITGPLIR.[I]	B2RWW6 [2293-2312]
Q3V117	[R].KPASFMTSICDER.[G]	Q3V117 [836-848]
B2RQC6	[K].ALKEENIQTLLINPNIATVQTSQGLADK.[V]	B2RQC6 [422-449]
P31254; B9EHN0	[K].DDDSNFHMDFIVAASNLR.[A]	P31254 [852-869]; B9EHN0 [852-869]
H3BJQ7	[K].GVLFGVPGAFTPGCSK.[VT]	H3BJQ7 [86-101]
P31254; B9EHN0	[R].DEFEGLFK.[Q]	P31254 [649-656]; B9EHN0 [650-657]
Q9Z1N5	[R].ILVATNLFGR.[G]	Q9Z1N5 [340-349]
Q5SWU9	[R].QVQAEVPGSPIFVMR.[L]	Q5SWU9 [335-349]
Q8BP47	[R].LMTDTINEPILLCR.[F]	Q8BP47 [437-450]
Q8BFY9	[K].LIPVLVNGMK.[Y]	Q8BFY9 [308-317]
Q6ZQK2	[K].LGLAPQIQDLYGK.[V]	Q6ZQK2 [186-198]
Q3UIF3	[R].APFDLFENR.[K]	Q3UIF3 [348-356]
Q9DCL9	[R].ASILNTWISLK.[Q]	Q9DCL9 [404-414]
Q3UJW9	[K].MPLIGLGTWK.[S]	Q3UJW9 [14-23]
P14211	[K].LFPSGLDQKDMHGDSEYNIMFGPDICGPGTK.[K]	P14211 [112-142]
P17742	[K].EGMNIVEAMER.[F]	P17742 [134-144]
Q8BTM8	[R].LYSVSYLLK.[D]	Q8BTM8 [2613-2621]
Q8BTM8	[R].TGVELGKPTHFTVNAK.[T]	Q8BTM8 [885-900]
Q9Z2X1	[R].VTGEADVEFATHEEAVAAMSK.[D]	Q9Z2X1 [327-347]
O88291	[R].ESVLTATSILNNPIVK.[A]	O88291 [444-459]
Q6ZQ38	[K].ALTLIAGSPLK.[I]	Q6ZQ38 [631-641]
Q3UA53	[R].YVANLFPYK.[G]	Q3UA53 [80-88]
P09411	[K].NNQITNNQR.[I]	P09411 [31-39]
Q6A0F1	[K].IAVYSCPFDGMITETK.[G]	Q6A0F1 [246-261]
Q61781	[R].ADLEMQIESLKEELAYLKK.[N]	Q61781 [239-257]
Q9JHU4	[K].TMTLFSALR.[A]	Q9JHU4 [2600-2608]
Q3V117	[K].TILSLMTR.[E]	Q3V117 [322-329]
Q7TQG1	[R].SIHEVDISNLEAALR.[A]	Q7TQG1 [992-1006]
Q3TQX5	[K].QYPISLVLAPTR.[E]	Q3TQX5 [265-276]
Q52KC1	[K].MFVLDEADEMLSR.[G]	Q52KC1 [179-191]
Q80TM2	[R].LNEAAAGLNQAATELVQASR.[G]	Q80TM2 [1265-1284]
Q9R1P0	[K].LLDEVFFSEK.[I]	Q9R1P0 [55-64]
Q9JHU4	[K].DLFQVAFNR.[V]	Q9JHU4 [3860-3868]
Q80U89	[R].GQCDLELINVCNENSLFK.[S]	Q80U89 [934-951]
Q3U630	[R].GFQEVVTPNIFNSR.[L]	Q3U630 [367-380]
Q9EQD6; P02535; Q61781	[KR].VTMQNLNDR.[L]	Q9EQD6 [115-123]; P02535 [146-154]; Q61781 [123-131]
B2RQC6	[R].LSLDDLLQR.[L]	B2RQC6 [1723-1731]
Q8BFY9	[R].SLSGLILK.[N]	Q8BFY9 [74-81]
O08582	[K].LVLVSPTSEQYDSLLR.[Q]	O08582 [65-80]
Q9CW46	[R].GLPGDVTNQEVHDLLSDYELK.[Y]	Q9CW46 [65-85]
Q80TM2	[K].EADESLNFEEQILEAAK.[S]	Q80TM2 [2357-2373]
I6L985	[K].APQVYTIPPPKEQMAK.[D]	I6L985 [367-382]
Q542X7	[R].LALVTGGEIASTFDHPELVK.[L]	Q542X7 [323-342]
Q8C1B2	[R].FYCNPENDR.[M]	Q8C1B2 [293-301]
P06745	[K].MIPCDFLIPVQTQHPIRK.[G]	P06745 [401-418]
Q6PAR5	[R].LSAQAQVAEDILDKYR.[N]	Q6PAR5 [1020-1035]
Q8C196	[K].TVVVNCNPETVSTDFDECDKLYFEELSLER.[I]	Q8C196 [1010-1039]
B7U582; P63017	[K].LLQDFFNGKELNK.[S]	B7U582 [352-364]; P63017 [349-361]
P40142	[K-].NSTFSELFKK.[E]	P40142 [344-353]
Q6ZQ38	[R].AVAALLTIPEAEK.[S]	Q6ZQ38 [1179-1191]
I6L985	[R].VNSAAFPAPIEK.[T]	I6L985 [345-356]
P04104	[R].TNAENEFVTIK.[K]	P04104 [286-296]
Q3U4U6	[R].IVLLDSSLEYK.[K]	Q3U4U6 [238-248]
F7BGR7	[K].LFIGNLPR.[E]	F7BGR7 [120-127]
B2RQC6	[R].GTKQEEFESIEEALPDTDVLYMTR.[I]	B2RQC6 [2123-2146]
Q8BTM8	[R].VSGQGLHEGHTFEPAEFIIDTR.[D]	Q8BTM8 [2052-2073]
P17751	[K].FFVGGNWK.[M]	P17751 [57-64]
Q8BL97; P84104	[R].NPPGFAFVEFEDPR.[D]	Q8BL97 [74-87]; P84104 [44-57]
Q3U630	[R].IYGISFPDPK.[L]	Q3U630 [296-305]
Q3UIF3; P11499	[R].GVVDSEDIPLNLSR.[E]	Q3UIF3 [388-401]; P11499 [379-392]
P14152	[K].EVGVYEALKDDSWLK.[G]	P14152 [206-220]
B2RTM0	[K].TVTAMDVVYALKR.[Q]	B2RTM0 [81-93]
Q6ZPT2	[R].SFITTDVNPYYDSFVR.[W]	Q6ZPT2 [238-253]
P09103	[K].HNQLPLVIEFTEQTAPK.[I]	P09103 [233-249]
Q6IFX2; Q61781	[R].GQVGGDVNVEMDAAPGVDLSR.[I]	Q6IFX2 [241-261]; Q61781 [268-288]
Q32P04	[K].MFFDAELSQMQTHVSDTSVVLSMDNNR.[S]	Q32P04 [299-325]
P60766	[K].TPFLLVGTQIDLRDDPSTIEK.[L]	P60766 [108-128]
P99024	[R].ISVYYNEATGGK.[Y]	P99024 [47-58]
P68372	[R].INVYYNEATGGK.[Y]	P68372 [47-58]
Q80U89	[R].ISGETIFVTAPHEATAGIIGVNR.[K]	Q80U89 [308-330]
Q91X84	[R].LFSLSNPSLSTTNLSGPSR.[R]	Q91X84 [366-384]
P14152	[K].FVEGLPINDFSR.[E]	P14152 [299-310]
P60335	[R].IITLTGPTNAIFK.[A]	P60335 [58-70]
P63017	[K].FELTGIPPAPR.[G]	P63017 [459-469]
P60710	[K].LCYVALDFEQEMATAASSSSLEK.[SG]	P60710 [216-238]
Q8BFY9	[K].YSDIDIILLK.[G]	Q8BFY9 [318-327]
Q6ZWN5	[R].LFEGNALLR.[R]	Q6ZWN5 [71-79]
A2AFQ2	[K].GGIVGMTLPIAR.[D]	A2AFQ2 [183-194]
Q3V117	[K].EILIPVFK.[N]	Q3V117 [547-554]
Q8C1B2	[K].HHTVLPYHWQIKR.[T]	Q8C1B2 [261-273]
Q32P04	[R].VDALMDEINFMK.[M]	Q32P04 [287-298]
Q80U89	[K].VSQPIEGHAASFAQFK.[M]	Q80U89 [200-215]
Q3TI05	[K].VLAQNSGFDLQETLVK.[V]	Q3TI05 [450-465]
B2RTP7	[R].DYQELMNTK.[L]	B2RTP7 [483-491]
Q9JHU4	[K].VAAPDVVVPTLDTVR.[H]	Q9JHU4 [2560-2574]
Q8BU30	[R].FGWDCHGLPVEYEIDK.[T]	Q8BU30 [83-98]
Q6ZWN5	[K].QVVNIPSFIVR.[L]	Q6ZWN5 [140-150]
Q3U111	[K].APDFVFYAPR.[L]	Q3U111 [343-352]
Q6A0F1	[K].LFVTNDAATILR.[E]	Q6A0F1 [70-81]
Q61781	[R].TMQNLEIELQSQLSMK.[A]	Q61781 [343-358]
Q3UW40	[K].VFQFLNAK.[C]	Q3UW40 [28-35]
P07742	[R].VLSGEFQIVNPHLLK.[D]	P07742 [629-643]
P62962	[K].TLVLLMGK.[E]	P62962 [109-116]
Q8BTM8	[R].LSPFMADIR.[E]	Q8BTM8 [656-664]
Q80U89	[K].SVNESLNNLFITEEDYQALR.[T]	Q80U89 [1471-1490]
Q8C1B2	[R].VQNQFLWEK.[Y]	Q8C1B2 [498-506]
Q9D6F9; P68372	[R].AVLVDLEPGTMDSVR.[S]	Q9D6F9 [63-77]; P68372 [63-77]
Q9D6F9; Q9ERD7; P99024; P68372	[R].IMNTFSVVPSPK.[V]	Q9D6F9 [163-174]; Q9ERD7 [163-174]; P99024 [163-174]; P68372 [163-174]
Q6ZQK2	[R].SNQQLENDLNLMDIK.[I]	Q6ZQK2 [926-940]
I6L985	[K].NTQPIMDTDGSYFVYSK.[L]	I6L985 [415-431]
Q02257	[R].LNYGIPAIVK.[L]	Q02257 [478-487]
P52480	[R].AEGSDVANAVLDGADCIMLSGETAK.[G]	P52480 [343-367]
P97461	[R].VNQAIWLLCTGAR.[E]	P97461 [147-159]
Q3UXQ6	[R].LSNIFVIGK.[G]	Q3UXQ6 [222-230]
P60710	[K].EKLCYVALDFEQEMATAASSSSLEK.[SG]	P60710 [214-238]
Q8VDD5	[K].LDPHLVLDQLR.[C]	Q8VDD5 [683-693]
Q9JHU4	[K].SLLQALNEVK.[G]	Q9JHU4 [3746-3755]
Q80X90	[K].AHGPGLEGGLVGKPAEFTIDTK.[G]	Q80X90 [1045-1066]
Q9JHU4	[R].DLPPVSGSIIWAK.[Q]	Q9JHU4 [638-650]
E9Q557	[K].ITNLTQQLEQASIVK.[K]	E9Q557 [1624-1638]
Q3UIF3	[K].HGLEVIYMIEPIDEYCVQQLK.[E]	Q3UIF3 [515-535]
Q3TIX6	[K].IDSIPHLNNSTPLVDPSVYGYGVQK.[R]	Q3TIX6 [33-57]
Q9CWK0	[K].LVAIVDVIDQNR.[A]	Q9CWK0 [24-35]
P05214; P68373; A0A0A0MQA5	[R].AFVHWYVGEGMEEGEFSEAR.[E]	P05214 [403-422]; P68373 [403-422]; A0A0A0MQA5 [432-451]
Q3TL71	[R].LLIHQSLAGGIIGVK.[G]	Q3TL71 [149-163]
Q80X90	[R].TFEMSDFIVDTR.[D]	Q80X90 [2017-2028]
Q9EPL8	[R].DVPNETLQVEEDDRPELPWWK.[C]	Q9EPL8 [239-259]
Q80X90	[K].FNGSHVVGSPFK.[V]	Q80X90 [2361-2372]
Q7TMM9; Q9D6F9; Q9ERD7; P99024; P68372	[R].EIVHLQAGQCGNQIGAK.[F]	Q7TMM9 [3-19]; Q9D6F9 [3-19]; Q9ERD7 [3-19]; P99024 [3-19]; P68372 [3-19]
Q9CW46	[K].DSGPLPTPPGVSLLGEPPKDYR.[I]	Q9CW46 [488-509]
Q8BKC5	[K].VIAALLQTMEDQGNQR.[V]	Q8BKC5 [442-457]
A0A0A0MQF6	[K].RVIISAPSADAPMFVMGVNHEK.[Y]	A0A0A0MQF6 [142-163]
P05214; P68373; A0A0A0MQA5	[R].NLDIERPTYTNLNR.[L]	P05214 [216-229]; P68373 [216-229]; A0A0A0MQA5 [245-258]
Q02257	[K].LLNQPNQWPLVK.[A]	Q02257 [488-499]
A0A0A0MQF6	[K].QASEGPLK.[G]	A0A0A0MQF6 [288-295]
P58252	[K].KEDLYLKPIQR.[T]	P58252 [439-449]
E9PW66	[K].NVDLLSDMVQEHDEPILK.[H]	E9PW66 [204-221]
Q80X90	[R].GQHVTGSPFQFTVGPLGEGGAHK.[V]	Q80X90 [2173-2195]
P02535	[R].LENEIQTYR.[S]	P02535 [440-448]
A6ZI44	[R].YASICQQNGIVPIVEPEILPDGDHDLKR.[C]	A6ZI44 [228-255]
P20029	[K].TFAPEEISAMVLTK.[M]	P20029 [140-153]
Q922F4	[R].ISEQFSAMFR.[R]	Q922F4 [381-390]
Q02257	[R].ALMGSPQLVAAVVR.[T]	Q02257 [178-191]
Q9JHU4	[K].LNTQEIFDDWAR.[K]	Q9JHU4 [691-702]
Q02257	[R].VSVELTNSLFK.[H]	Q02257 [664-674]
Q3THJ6	[K].FNADEFEDMVAEK.[R]	Q3THJ6 [176-188]
Q80Y56	[K].EHTPDIVKLYEK.[L]	Q80Y56 [269-280]
Q6NZJ6	[R].GLPLVDDGGWNTVPISK.[G]	Q6NZJ6 [1047-1063]
Q9JHU4	[R].DAATIMQPYFTSNGLVTK.[A]	Q9JHU4 [2416-2433]
Q9ERK4	[K].ANIVHLMLSSPEQIQK.[Q]	Q9ERK4 [94-109]
Q3UAG2	[K].VGTGEPCCDWVGDEGAGHFVK.[M]	Q3UAG2 [164-184]
P52480	[R].RFDEILEASDGIMVAR.[G]	P52480 [279-294]
Q9EQD6; P02535; Q61781	[KR].VTMQNLNDR.[L]	Q9EQD6 [115-123]; P02535 [146-154]; Q61781 [123-131]
Q8C2Q7; P70333	[R].STGEAFVQFASQEIAEK.[A]	Q8C2Q7 [151-167]; P70333 [151-167]
Q9JHU4	[R].ILDDDTIITTLENLKR.[E]	Q9JHU4 [3758-3773]
P08730; P02535	[R].QSVEADINGLRR.[V]	P08730 [194-205]; P02535 [244-255]
P70126	[K].TDVVTVNPSIIIDRFHK.[L]	P70126 [244-260]
Q8C196	[K].GYSFGHPSSVAGEVVFNTGLGGYPEALTDPAYK.[G]	Q8C196 [58-90]
A6ZI44	[R].YASICQQNGIVPIVEPEILPDGDHDLK.[R]	A6ZI44 [228-254]
P08730; P02535	[R].QSVEADINGLR.[R]	P08730 [194-204]; P02535 [244-254]
Q7TMM9	[R].ALTVPELTQQMFDSK.[N]	Q7TMM9 [283-297]
Q8VDD5	[K].VSHLLGINVTDFTR.[G]	Q8VDD5 [374-387]
P09411	[K].VSHVSTGGGASLELLEGK.[IV]	P09411 [389-406]
B9EHN0	[K].NFPNAIEHTLQWAR.[D]	B9EHN0 [636-649]
Q497E9	[K].ELEFYLR.[K]	Q497E9 [194-200]
Q3UIF3	[R].LVTSPCCIVTSTYGWTANMER.[I]	Q3UIF3 [593-613]
Q8BFZ3; P60710	[R].TTGIVMDSGDGVTHTVPIYEGYALPHAILR.[L]	Q8BFZ3 [149-178]; P60710 [148-177]
Q564E8	[R].QPYAVSELAGHQTSAESWGTGR.[A]	Q564E8 [50-71]
Q3UV17	[K].AQYEDIAQK.[S]	Q3UV17 [343-351]
Q9JHU4	[R].LLNTFLER.[L]	Q9JHU4 [4262-4269]
P80315	[R].ALIAGGGAPEIELALR.[L]	P80315 [420-435]
Q8BKC5	[R].VAAAESMPLLLECAR.[V]	Q8BKC5 [721-735]
Q3UZH3	[K].QGFGNLPICMAK.[T]	Q3UZH3 [857-868]
Q9DB79	[K].NMSVHLSPCFR.[D]	Q9DB79 [108-118]
Q04447	[K].VLTPELYAELR.[A]	Q04447 [33-43]
Q3THJ6	[K].VDEFPLCGHMVSDEYEQLSSEALEAAR.[I]	Q3THJ6 [43-69]
Q6NZJ6	[K].ITKPGSIDSNNQLFAPGGR.[L]	Q6NZJ6 [1076-1094]
P05214; P68373; A0A0A0MQA5	[R].FDGALNVDLTEFQTNLVPYPR.[I]	P05214 [244-264]; P68373 [244-264]; A0A0A0MQA5 [273-293]
Q7TMM9; Q9D6F9; Q9ERD7; P99024; P68372; Q922F4	[K].LAVNMVPFPR.[L]	Q7TMM9 [253-262]; Q9D6F9 [253-262]; Q9ERD7 [253-262]; P99024 [253-262]; P68372 [253-262]; Q922F4 [253-262]
Q7TMM9; P68372	[K].MSATFIGNSTAIQELFKR.[I]	Q7TMM9 [363-380]; P68372 [363-380]
Q61553	[K].VGKDELFALEQSCAQVVLQAANER.[N]	Q61553 [248-271]
Q3UZH3	[K].THLSLSHNPEQK.[G]	Q3UZH3 [869-880]
Q9D6F9; Q9ERD7; P99024; P68372	[R].IMNTFSVVPSPK.[V]	Q9D6F9 [163-174]; Q9ERD7 [163-174]; P99024 [163-174]; P68372 [163-174]
Q3V117	[K].GVTIIGPATVGGIKPGCFK.[I]	Q3V117 [617-635]
P56480	[R].VALTGLTVAEYFR.[D]	P56480 [282-294]
P21550	[K].DATNVGDEGGFAPNILENNEALELLK.[T]	P21550 [203-228]
P11679	[R].LEGLTDEINFLR.[Q]	P11679 [220-231]
P11499	[R].LVSSPCCIVTSTYGWTANMER.[I]	P11499 [584-604]
P52480	[R].GIFPVLCK.[D]	P52480 [468-475]
Q9QWL7	[K].DAEDWFFSK.[T]	Q9QWL7 [270-278]
P80313	[K].LPIGDVATQYFADR.[D]	P80313 [293-306]
Q8BTM8	[K].DAGEGLLAVQITDPEGKPK.[K]	Q8BTM8 [1574-1592]
Q7TMM9	[K].ESESCDCLQGFQLTHSLGGGTGSGMGTLLISK.[I]	Q7TMM9 [123-154]
P99024	[K].MAVTFIGNSTAIQELFKR.[I]	P99024 [363-380]
Q564E8	[R].NIPGITLLNVSK.[L]	Q564E8 [223-234]
E9QNP0	[K].ESTLHLVLR.[LV]	E9QNP0 [168-176]
P24547	[R].VGMGSGSICITQEVLACGRPQATAVYK.[V]	P24547 [323-349]
P52480	[K].KGVNLPGAAVDLPAVSEKDIQDLK.[F]	P52480 [207-230]
Q8C196	[K].ATGYPLAFIAAK.[I]	Q8C196 [729-740]
P63038	[R].AAVEEGIVLGGGCALLR.[C]	P63038 [430-446]
Q3TF18; P11103	[R].IAPPEAPVTGYMFGK.[G]	Q3TF18 [879-893]; P11103 [878-892]
P17742	[R].VSFELFADK.[V]	P17742 [20-28]
P63017	[K].HWPFMVVNDAGRPK.[V]	P63017 [89-102]
Q80X90	[K].VHSPSGAVEECHVSELEPDKYAVR.[F]	Q80X90 [2323-2346]
P42128	[R].NSSQGSVDLSMGLSSFISR.[R]	P42128 [114-132]
Q80X90; Q8BTM8; Q8VHX6	[R].LLGWIQNK.[LIV]	Q80X90 [145-152]; Q8BTM8 [172-179]; Q8VHX6 [166-173]
P99024	[K].MAVTFIGNSTAIQELFKR.[I]	P99024 [363-380]
P58252	[K].EGIPALDNFLDK.[L]	P58252 [846-857]
Q8C196	[R].DGSIDLVINLPNNNTK.[F]	Q8C196 [1429-1444]
P04104	[K].RTNAENEFVTIKK.[D]	P04104 [285-297]
Q921L4	[R].LLLPGELAK.[H]	Q921L4 [101-109]
Q7TMM9; P68372	[K].MSATFIGNSTAIQELFK.[R]	Q7TMM9 [363-379]; P68372 [363-379]
Q3U4U6	[R].NVLLDPQLVPGGGASEMAVAHALTEK.[S]	Q3U4U6 [400-425]
P52480	[R].EAEAAIYHLQLFEELR.[R]	P52480 [384-399]
P02535	[R].ALEESNYELEGK.[I]	P02535 [164-175]
Q8BTM8	[R].VTYTPMAPGSYLISIK.[Y]	Q8BTM8 [2485-2500]
Q80X90	[R].GEAGIPAEFSIWTR.[E]	Q80X90 [2206-2219]
Q8C196	[R].FLGVAEQLHNEGFK.[L]	Q8C196 [1374-1387]
P99024	[K].MAVTFIGNSTAIQELFK.[R]	P99024 [363-379]
P16125	[K].FIIPQIVK.[Y]	P16125 [120-127]
Q3TL71	[R].GSYGDLGGPIITTQVTIPK.[D]	Q3TL71 [378-396]
Q9ERD7; Q922F4	[R].YLTVATVFR.[G]	Q9ERD7 [310-318]; Q922F4 [310-318]
Q7TMM9; Q9D6F9; Q9ERD7; P99024; P68372; Q922F4	[R].FPGQLNADLR.[K]	Q7TMM9 [242-251]; Q9D6F9 [242-251]; Q9ERD7 [242-251]; P99024 [242-251]; P68372 [242-251]; Q922F4 [242-251]
Q80X90	[K].SPFTVGVAAPLDLSK.[I]	Q80X90 [932-946]
B2CSK2	[K].QTQIFTTYSDNQPGVLIQVYEGER.[A]	B2CSK2 [426-449]
Q9JHU4	[R].IFVFEPPPGVK.[A]	Q9JHU4 [4142-4152]
Q80U89	[R].LAELEEFINGPNNAHIQQVGDR.[C]	Q80U89 [1193-1214]
Q9DB79	[R].DVQIGDIVTVGECRPLSK.[T]	Q9DB79 [119-136]
P19096	[K].VLEALLPLK.[S]	P19096 [2376-2384]
Q8BTM8	[K].LPQLPITNFSR.[D]	Q8BTM8 [180-190]
Q8C196	[K].TLGVDFIDVATK.[V]	Q8C196 [1270-1281]
Q32P04	[R].VDALMDEINFMK.[M]	Q32P04 [287-298]
B2RQC6	[R].NERPDGVLLTFGGQTALNCGVELTK.[A]	B2RQC6 [466-490]
Q3TQX5	[R].VGNLGLATSFFNER.[N]	Q3TQX5 [535-548]
Q80U89	[R].LASTLVHLGEYQAAVDGAR.[K]	Q80U89 [1237-1255]
A2AFQ0	[R].ESQLAHIKDEPPPLSPAPLTPATPSSLDPFFSR.[E]	A2AFQ0 [3909-3941]
Q3TVV6	[K].SSGPTSLFAVTVAPPGAR.[Q]	Q3TVV6 [182-199]
Q80X90	[R].LVSPGSANETSSILVESVTR.[S]	Q80X90 [2476-2495]
P40142	[K].QAFTDVATGSLGQGLGAACGMAYTGK.[Y]	P40142 [115-140]
B9EHN0	[R].QFLFRPWDVTK.[L]	B9EHN0 [516-526]
Q3UIF3	[K].KHLEINPDHSIIETLR.[Q]	Q3UIF3 [633-648]
P17742	[R].VSFELFADKVPK.[AT]	P17742 [20-31]
Q8BTM8	[R].YWPQEAGEYAVHVLCNSEDIR.[L]	Q8BTM8 [635-655]
Q3UIF3	[K].HSQFIGYPITLFVEK.[E]	Q3UIF3 [210-224]
Q3TJG6	[K].HLNEIDLFHCIDPNDSK.[H]	Q3TJG6 [49-65]
P68373	[K].AYHEQLTVAEITNACFEPANQMVK.[C]	P68373 [281-304]
Q3V0Z8; Q3U741; Q3TQX5	[R].MLDMGFEPQIR.[KR]	Q3V0Z8 [328-338]; Q3U741 [251-261]; Q3TQX5 [352-362]
Q52KC1	[R].GIYAYGFEKPSAIQQR.[A]	Q52KC1 [47-62]
P63017; P17879	[K].QTQTFTTYSDNQPGVLIQVYEGER.[A]	P63017 [424-447]; P17879 [424-447]
P05214; P68373	[K].RTIQFVDWCPTGFK.[V]	P05214 [339-352]; P68373 [339-352]
P17879	[K].LLQDFFNGR.[D]	P17879 [349-357]
Q3V117	[K].QHFPATPLLDYALEVEK.[I]	Q3V117 [996-1012]
B9EHN0	[K].IHVSDQELQSANASVDDSRLEELK.[A]	B9EHN0 [807-830]
Q3UIF3; P11499	[K].HFSVEGQLEFR.[A]	Q3UIF3 [329-339]; P11499 [320-330]
D3YWN7	[R].LLTPTHSFLAR.[S]	D3YWN7 [229-239]
Q8BGZ7	[R].NMQEVVEDFK.[V]	Q8BGZ7 [228-237]
Q3THQ5	[R].LAYINPDLALEEK.[N]	Q3THQ5 [352-364]
P58252	[R].KIWCFGPDGTGPNILTDITK.[G]	P58252 [648-667]
Q61781	[R].TMQNLEIELQSQLSMK.[A]	Q61781 [343-358]
Q7TMM9; P99024; P68372	[K].EVDEQMLNVQNK.[N]	Q7TMM9 [325-336]; P99024 [325-336]; P68372 [325-336]
B9EHN0	[K].ATLPSPDKLPGFK.[M]	B9EHN0 [831-843]
B2RQC6	[R].LLDTIGISQPQWR.[E]	B2RQC6 [1054-1066]
P05214; P68373	[K].DVNAAIATIK.[T]	P05214 [327-336]; P68373 [327-336]
Q9JHU4	[K].VTDFGDKVEDPTFLNQLQSGVNR.[W]	Q9JHU4 [227-249]
P63017	[K].GPAVGIDLGTTYSCVGVFQHGK.[V]	P63017 [4-25]
A0A0A0MQF6	[R].VIISAPSADAPMFVMGVNHEK.[Y]	A0A0A0MQF6 [143-163]
P63038	[K].TLNDELEIIEGMK.[F]	P63038 [206-218]
Q52KC1	[R].VLITTDLLAR.[GS]	Q52KC1 [326-335]
Q3UIF3	[R].RAPFDLFENR.[K]	Q3UIF3 [347-356]
Q6IFX2; P19001; Q61781; Q9QWL7	[R].VLDELTLAR.[AT]	Q6IFX2 [203-211]; P19001 [192-200]; Q61781 [230-238]; Q9QWL7 [193-201]
A0A0A0MQA5	[K].TIGGGDDSFTTFFCETGAGK.[H]	A0A0A0MQA5 [70-89]
P52480	[K].CDENILWLDYK.[N]	P52480 [152-162]
Q3TF18; P11103	[R].TTNFAGILSQGLR.[I]	Q3TF18 [866-878]; P11103 [865-877]
E9Q557	[R].LLEAQIATGGIIDPK.[E]	E9Q557 [2379-2393]
Q3UA81	[K].SGDAAIVDMVPGKPMCVESFSDYPPLGR.[F]	Q3UA81 [396-423]
Q02257	[R].NEGTATYAAAVLFR.[I]	Q02257 [638-651]
Q61781	[R].ADLEMQIESLKEELAYLKK.[N]	Q61781 [239-257]
Q9EPL8	[R].NPVWYQALTHGLNEEQR.[K]	Q9EPL8 [973-989]
Q7TMM9; Q9D6F9; Q9ERD7; P99024; P68372	[K].RISEQFTAMFR.[R]	Q7TMM9 [380-390]; Q9D6F9 [380-390]; Q9ERD7 [380-390]; P99024 [380-390]; P68372 [380-390]
P24547	[R].VGMGSGSICITQEVLACGRPQATAVYK.[V]	P24547 [323-349]
Q6ZQK2	[K].LEGVLAEVAQHYQDTLIR.[A]	Q6ZQK2 [592-609]
P63017	[K].SFYPEEVSSMVLTK.[M]	P63017 [113-126]
P58252	[K].GPLMMYISK.[M]	P58252 [392-400]
B7U582; P63017	[R].FEELNADLFR.[G]	B7U582 [305-314]; P63017 [302-311]
Q80X90	[K].VLFASQEIPASPFR.[V]	Q80X90 [823-836]
P11499	[R].GFEVVYMTEPIDEYCVQQLK.[E]	P11499 [507-526]
Q8BTM8	[K].FNEEHIPDSPFVVPVASPSGDAR.[R]	Q8BTM8 [2311-2333]
P52480	[R].RFDEILEASDGIMVAR.[G]	P52480 [279-294]
P17879	[R].IINEPTAAAIAYGLDR.[T]	P17879 [172-187]
B2CSK2; P17879	[K].DAGVIAGLNVLR.[I]	B2CSK2 [162-173]; P17879 [160-171]
Q3TL71	[R].IITITGTQDQIQNAQYLLQNSVK.[SQ]	Q3TL71 [434-456]
P05214; P68373; A0A0A0MQA5	[R].AFVHWYVGEGMEEGEFSEAR.[E]	P05214 [403-422]; P68373 [403-422]; A0A0A0MQA5 [432-451]
Q7TMM9; P68372	[K].MSATFIGNSTAIQELFKR.[I]	Q7TMM9 [363-380]; P68372 [363-380]
Q922F4	[K].MASTFIGNSTAIQELFKR.[I]	Q922F4 [363-380]
Q9D6F9	[K].MAATFIGNSTAIQELFKR.[I]	Q9D6F9 [363-380]
P19096	[K].FDASFFGVHPK.[Q]	P19096 [60-70]
P17742	[K].HTGPGILSMANAGPNTNGSQFFICTAK.[T]	P17742 [92-118]
P52480	[K].GVNLPGAAVDLPAVSEKDIQDLK.[F]	P52480 [208-230]
P24547	[K].KYEQGFITDPVVLSPK.[D]	P24547 [109-124]
P05214; P68373; A0A0A0MQA5	[K].VGINYQPPTVVPGGDLAK.[V]	P05214 [353-370]; P68373 [353-370]; A0A0A0MQA5 [382-399]
P60710	[R].CPEALFQPSFLGMESCGIHETTFNSIMK.[C]	P60710 [257-284]
P70168	[K].LAATNALLNSLEFTK.[A]	P70168 [192-206]
P24547	[R].RFGVPVIADGGIQNVGHIAK.[A]	P24547 [356-375]
P58252	[R].GHVFEESQVAGTPMFVVK.[A]	P58252 [768-785]
Q8VDD5	[R].LQQELDDLLVDLDHQR.[Q]	Q8VDD5 [1418-1433]
P18760	[K].LGGSAVISLEGKPL.[-]	P18760 [153-166]
P40142	[R].VLDPFTIKPLDR.[K]	P40142 [531-542]
Q3UIF3; P11499	[K].VILHLKEDQTEYLEER.[R-]	Q3UIF3 [186-201]; P11499 [181-196]
P17742	[R].IIPGFMCQGGDFTR.[H]	P17742 [56-69]
P17751	[K].VVLAYEPVWAIGTGK.[T]	P17751 [211-225]
P11499	[K].KHLEINPDHPIVETLR.[Q]	P11499 [624-639]
P52480	[K].GVNLPGAAVDLPAVSEK.[D]	P52480 [208-224]
P09411	[K].LGDVYVNDAFGTAHR.[A]	P09411 [157-171]
A6ZI44	[K].IGEHTPSALAIMENANVLAR.[Y]	A6ZI44 [208-227]
P58252	[K].ARPFPDGLAEDIDKGEVSAR.[Q]	P58252 [606-625]
A2AFQ2	[R].GVIINTASVAAFEGQVGQAAYSASK.[G]	A2AFQ2 [158-182]
P04104	[R].FLEQQNQVLQTK.[W]	P04104 [208-219]
P60710	[K].DLYANTVLSGGTTMYPGIADR.[M]	P60710 [292-312]
P11499	[K].SLTNDWEDHLAVK.[H]	P11499 [307-319]
Q3UA81	[K].YYVTIIDAPGHR.[D]	Q3UA81 [85-96]
Q32P04	[K].MFFDAELSQMQTHVSDTSVVLSMDNNR.[S]	Q32P04 [299-325]
B2RTM0	[K].VFLENVIR.[D]	B2RTM0 [61-68]
B7U582	[R].GPAIGIDLGTTYSCVGVFQHGK.[V]	B7U582 [5-26]
Q9CPN9	[R].VSTVALPR.[S]	Q9CPN9 [124-131]
P19096	[K].GVDLVLNSLAEEK.[L]	P19096 [1733-1745]
Q8C1B2	[K].GVHFMFLAK.[V]	Q8C1B2 [582-590]
Q9Z2L2	[R].VSLDVNHFAPDELTVK.[T]	Q9Z2L2 [20-35]
Q3UA81	[K].THINIVVIGHVDSGK.[S]	Q3UA81 [6-20]
P60710; P68134	[K].IWHHTFYNELR.[V]	P60710 [85-95]; P68134 [87-97]
Q3UA81	[R].EHALLAYTLGVK.[Q]	Q3UA81 [135-146]
P63017	[K].SQIHDIVLVGGSTR.[I]	P63017 [329-342]
P52480	[R].AGKPVICATQMLESMIK.[K]	P52480 [320-336]
P09411	[K].ALESPERPFLAILGGAK.[V]	P09411 [200-216]
P68373	[K].AYHEQLTVAEITNACFEPANQMVK.[C]	P68373 [281-304]
Q9D6F9	[K].MAATFIGNSTAIQELFK.[R]	Q9D6F9 [363-379]
P11499	[K].HLEINPDHPIVETLR.[Q]	P11499 [625-639]
P05214	[K].EIVDLVLDR.[I]	P05214 [113-121]
Q7TMM9; P68372	[K].MSATFIGNSTAIQELFK.[R]	Q7TMM9 [363-379]; P68372 [363-379]
Q9D6F9	[K].MAATFIGNSTAIQELFK.[R]	Q9D6F9 [363-379]
Q922F4	[K].MASTFIGNSTAIQELFK.[R]	Q922F4 [363-379]
P52480	[R].EAEAAIYHLQLFEELRR.[L]	P52480 [384-400]
Q3UIF3	[K].HLEINPDHSIIETLR.[Q]	Q3UIF3 [634-648]
P05214; P68373; A0A0A0MQA5	[R].AVCMLSNTTAIAEAWAR.[L]	P05214 [374-390]; P68373 [374-390]; A0A0A0MQA5 [403-419]
P24547	[K].FVPYLIAGIQHSCQDIGAK.[S]	P24547 [456-474]
P68373	[K].EIIDLVLDR.[I]	P68373 [113-121]
P52480	[K].GADFLVTEVENGGSLGSK.[K]	P52480 [189-206]
B7U582; P63017	[R].IINEPTAAAIAYGLDKK.[VG]	B7U582 [173-189]; P63017 [172-188]
Q6IFX2	[K].DAEEWFFTK.[T]	Q6IFX2 [280-288]
P11499	[R].YHTSQSGDEMTSLSEYVSR.[M]	P11499 [457-475]
P68134	[KR].YPIEHGIITNWDDMEK.[I]	P68134 [71-86]
P52480	[K].IYVDDGLISLQVK.[E]	P52480 [174-186]
P09411	[K].ITLPVDFVTADKFDENAK.[T]	P09411 [280-297]
Q7TMM9; Q9D6F9; P99024; P68372	[K].LTTPTYGDLNHLVSATMSGVTTCLR.[F]	Q7TMM9 [217-241]; Q9D6F9 [217-241]; P99024 [217-241]; P68372 [217-241]
Q3UA81	[R].VETGVLKPGMVVTFAPVNVTTEVK.[S]	Q3UA81 [267-290]
P24547	[R].FGVPVIADGGIQNVGHIAK.[A]	P24547 [357-375]
Q7TMM9; Q9D6F9; Q9ERD7; P99024; P68372; Q922F4	[K].NSSYFVEWIPNNVK.[TV]	Q7TMM9 [337-350]; Q9D6F9 [337-350]; Q9ERD7 [337-350]; P99024 [337-350]; P68372 [337-350]; Q922F4 [337-350]
Q7TMM9; Q9D6F9; P99024; P68372	[R].LHFFMPGFAPLTSR.[G]	Q7TMM9 [263-276]; Q9D6F9 [263-276]; P99024 [263-276]; P68372 [263-276]
Q8VED5	[R].NLDLDSIIAEVK.[A]	Q8VED5 [304-315]
P58252	[K].AYLPVNESFGFTADLR.[S]	P58252 [786-801]
P52480	[R].LAPITSDPTEAAAVGAVEASFK.[C]	P52480 [401-422]
P20029; B7U582; P63017; B2CSK2	[R].IINEPTAAAIAYGLDK.[RGK]	P20029 [199-214]; B7U582 [173-188]; P63017 [172-187]; B2CSK2 [174-189]
I6L985	[R].DCGCKPCICTVPEVSSVFIFPPKPK.[D]	I6L985 [246-270]
Q8C1B2	[K].GVHFMFLAK.[V]	Q8C1B2 [582-590]
Q7TMM9; Q9D6F9; Q9ERD7; P99024; P68372	[-].MREIVHLQAGQCGNQIGAK.[F]	Q7TMM9 [1-19]; Q9D6F9 [1-19]; Q9ERD7 [1-19]; P99024 [1-19]; P68372 [1-19]
P60710; P68134	[R].AVFPSIVGRPR.[H-]	P60710 [29-39]; P68134 [31-41]
Q7TMM9; Q9D6F9; Q9ERD7; P99024; P68372	[-].MREIVHLQAGQCGNQIGAK.[F]	Q7TMM9 [1-19]; Q9D6F9 [1-19]; Q9ERD7 [1-19]; P99024 [1-19]; P68372 [1-19]
P62830	[R].ISLGLPVGAVINCADNTGAK.[N]	P62830 [16-35]
P05214; P68373; A0A0A0MQA5	[R].LDHKFDLMYAK.[RK]	P05214 [391-401]; P68373 [391-401]; A0A0A0MQA5 [420-430]
Q7TMM9; Q9ERD7; P99024	[R].AILVDLEPGTMDSVR.[S]	Q7TMM9 [63-77]; Q9ERD7 [63-77]; P99024 [63-77]
Q7TMM9; Q9D6F9; P99024; P68372	[R].LHFFMPGFAPLTSR.[G]	Q7TMM9 [263-276]; Q9D6F9 [263-276]; P99024 [263-276]; P68372 [263-276]
P50446; Q8BGZ7; Q3UV17; Q32P04	[K].LALDVEIATYR.[K]	P50446 [445-455]; Q8BGZ7 [443-453]; Q3UV17 [460-470]; Q32P04 [455-465]
P05214; A0A0A0MQA5	[K].AYHEQLSVAEITNACFEPANQMVK.[C]	P05214 [281-304]; A0A0A0MQA5 [310-333]
Q8C1B2	[R].IIYNLFHK.[T]	Q8C1B2 [476-483]
Q7TMM9; Q9D6F9; Q9ERD7; P99024; P68372; Q922F4	[R].KLAVNMVPFPR.[L]	Q7TMM9 [252-262]; Q9D6F9 [252-262]; Q9ERD7 [252-262]; P99024 [252-262]; P68372 [252-262]; Q922F4 [252-262]
Q8C1B2	[K].HHTVLPYHWQIK.[R]	Q8C1B2 [261-272]
Q7TMM9; Q9ERD7; P99024	[R].AILVDLEPGTMDSVR.[S]	Q7TMM9 [63-77]; Q9ERD7 [63-77]; P99024 [63-77]
Q3UA81	[K].SGDAAIVDMVPGKPMCVESFSDYPPLGR.[F]	Q3UA81 [396-423]
Q9D6F9; Q9ERD7; P68372; Q922F4	[R].ALTVPELTQQMFDAK.[N]	Q9D6F9 [283-297]; Q9ERD7 [283-297]; P68372 [283-297]; Q922F4 [283-297]
Q9D6F9; P99024; P68372	[K].EAESCDCLQGFQLTHSLGGGTGSGMGTLLISK.[I]	Q9D6F9 [123-154]; P99024 [123-154]; P68372 [123-154]
Q7TMM9; Q9D6F9; Q9ERD7; P99024; P68372; Q922F4	[R].FPGQLNADLRK.[L]	Q7TMM9 [242-252]; Q9D6F9 [242-252]; Q9ERD7 [242-252]; P99024 [242-252]; P68372 [242-252]; Q922F4 [242-252]
P05214; P68373; A0A0A0MQA5	[R].LDHKFDLMYAK.[RK]	P05214 [391-401]; P68373 [391-401]; A0A0A0MQA5 [420-430]
P05214; P68373; A0A0A0MQA5	[R].AVCMLSNTTAIAEAWAR.[L]	P05214 [374-390]; P68373 [374-390]; A0A0A0MQA5 [403-419]
P05214; P68373; A0A0A0MQA5	[R].QLFHPEQLITGK.[E-]	P05214 [85-96]; P68373 [85-96]; A0A0A0MQA5 [114-125]
P68373	[R].AVFVDLEPTVIDEVR.[TA]	P68373 [65-79]
Q8BFZ3; P60710	[R].TTGIVMDSGDGVTHTVPIYEGYALPHAILR.[L]	Q8BFZ3 [149-178]; P60710 [148-177]
P50446; Q8BGZ7; Q32P04	[R].SLDLDSIIAEVK.[A]	P50446 [316-327]; Q8BGZ7 [314-325]; Q32P04 [326-337]
Q3UA81	[R].VETGVLKPGMVVTFAPVNVTTEVK.[S]	Q3UA81 [267-290]
Q8BFZ3; P60710; P68134	[RK-].SYELPDGQVITIGNER.[F]	Q8BFZ3 [240-255]; P60710 [239-254]; P68134 [241-256]
P60710	[R].VAPEEHPVLLTEAPLNPK.[AR]	P60710 [96-113]
P05214; A0A0A0MQA5	[K].AYHEQLSVAEITNACFEPANQMVK.[C]	P05214 [281-304]; A0A0A0MQA5 [310-333]
A0A0A0MQA5	[R].SIQFVDWCPTGFK.[V]	A0A0A0MQA5 [369-381]
I6L985	[R].SVSELPIMHQDWLNGK.[E]	I6L985 [324-339]
P99024	[K].FWEVISDEHGIDPTGTYHGDSDLQLDR.[I]	P99024 [20-46]
I6L985	[K].DVLTITLTPK.[V]	I6L985 [271-280]
P05214; P68373	[R].TIQFVDWCPTGFK.[V]	P05214 [340-352]; P68373 [340-352]
P05214	[R].AVFVDLEPTVVDEVR.[T]	P05214 [65-79]
Q9D6F9; P68372	[K].FWEVISDEHGIDPTGTYHGDSDLQLER.[I]	Q9D6F9 [20-46]; P68372 [20-46]
P05214; P68373	[K].TIGGGDDSFNTFFSETGAGK.[H]	P05214 [41-60]; P68373 [41-60]
E9Q0F0	[R].SLNNQFASFIDKVR.[F]	E9Q0F0 [111-124]
Q9Z2T6; Q9DCV7	[K].LALDIEIATYR.[KR]	Q9Z2T6 [414-424]; Q9DCV7 [377-387]
I6L985	[K].TTPPSVYPLAPGSAAQTNSMVTLGCLVK.[G]	I6L985 [148-175]
Q7TMM9; Q9D6F9; P99024; P68372	[R].SGPFGQIFRPDNFVFGQSGAGNNWAK.[G]	Q7TMM9 [78-103]; Q9D6F9 [78-103]; P99024 [78-103]; P68372 [78-103]
P05214; P68373; A0A0A0MQA5	[R].IHFPLATYAPVISAEK.[A]	P05214 [265-280]; P68373 [265-280]; A0A0A0MQA5 [294-309]
Q7TMM9	[R].YLTVAAIFR.[G]	Q7TMM9 [310-318]
Q8C1B2	[R].HLFHGTSQDVVDGICK.[H]	Q8C1B2 [529-544]
Q9D6F9; P99024; P68372	[R].YLTVAAVFR.[G]	Q9D6F9 [310-318]; P99024 [310-318]; P68372 [310-318]
Q7TMM9; Q9D6F9; Q9ERD7; P99024; P68372	[R].ISEQFTAMFR.[R]	Q7TMM9 [381-390]; Q9D6F9 [381-390]; Q9ERD7 [381-390]; P99024 [381-390]; P68372 [381-390]
P99024	[R].ALTVPELTQQVFDAK.[N]	P99024 [283-297]
Q546G4	[K].LGEYGFQNAILVR.[Y]	Q546G4 [422-434]
E9Q0F0	[R].SLNNQFASFIDK.[V]	E9Q0F0 [111-122]
Q7TMM9; Q9D6F9; Q9ERD7; P99024; P68372; Q922F4	[K].LAVNMVPFPR.[L]	Q7TMM9 [253-262]; Q9D6F9 [253-262]; Q9ERD7 [253-262]; P99024 [253-262]; P68372 [253-262]; Q922F4 [253-262]
Q9D6F9; Q9ERD7; P68372; Q922F4	[R].ALTVPELTQQMFDAK.[N]	Q9D6F9 [283-297]; Q9ERD7 [283-297]; P68372 [283-297]; Q922F4 [283-297]
Q7TMM9; Q9ERD7; P99024; P68372; Q922F4	[K].GHYTEGAELVDSVLDVVR.[K]	Q7TMM9 [104-121]; Q9ERD7 [104-121]; P99024 [104-121]; P68372 [104-121]; Q922F4 [104-121]

## Sheet: HeLa Peptide Replicate 2
UniProt ID	Peptide Sequence	Positions in Master Proteins
E9PY58	[R].EVADVLVDGYNVHYGAR.[S]	E9PY58 [604-620]
P53996	[R].EQCCYNCGKPGHLAR.[D]	P53996 [96-110]
P48678	[R].NSNLVGAAHEELQQSR.[I]	P48678 [281-296]
Q3UC76	[R].ELVFKEDGQEYAQVIK.[M]	Q3UC76 [25-40]
Q546G4	[K].LGEYGFQNAILVR.[Y]	Q546G4 [422-434]
Q8BFY9	[K].ESQSPDTTIQR.[T]	Q8BFY9 [29-39]
P58252	[R].KIWCFGPDGTGPNILTDITK.[G]	P58252 [648-667]
Q7TMM9; P68372	[K].MSATFIGNSTAIQELFKR.[I]	Q7TMM9 [363-380]; P68372 [363-380]
Q922F4	[K].MASTFIGNSTAIQELFKR.[I]	Q922F4 [363-380]
B7U582; P63017	[R].ARFEELNADLFR.[G]	B7U582 [303-314]; P63017 [300-311]
Q6ZPT2	[K].GTGVVTSVPSDSPDDLAALR.[D]	Q6ZPT2 [419-438]
Q3V117	[R].GGPNYQEGLR.[V]	Q3V117 [380-389]
Q8VDD5	[K].IAQLEEQLDNETK.[E]	Q8VDD5 [1816-1828]
Q9JHU4	[R].IMFEVQDLK.[Y]	Q9JHU4 [2339-2347]
Q9JJ28	[K].ADLTALFLPR.[Q]	Q9JJ28 [875-884]
P41105	[R].KTVGVEPAADGK.[G]	P41105 [47-58]
Q8JZX9	[K].NAISLPVIGGPQALTLPTAQAPPKPPR.[L]	Q8JZX9 [106-132]
Q80TP8	[R].GPDNSMGFGAER.[K]	Q80TP8 [802-813]
Q3TL33	[R].HLVYESDQNKDGK.[L]	Q3TL33 [272-284]
A2A5Y6	[K].HVPGGGSVQIVYKPVDLSK.[V]	A2A5Y6 [607-625]
Q3ULG4	[R].IIAFVGSPVEDNEK.[D]	Q3ULG4 [109-122]
P63037	[R].HYNGEAYEDDEHHPR.[G]	P63037 [375-389]
A2AFQ0	[R].SAATSGAGSTTSGVVSGSLGSR.[E]	A2AFQ0 [1844-1865]
E9Q8Z8	[K].SNAAAYLQHLCYR.[N]	E9Q8Z8 [384-396]
Q8CC86	[R].AAFVAYALAFPR.[A]	Q8CC86 [270-281]
B2RUR3	[R].QPHILLLDEATSALDTESEK.[V]	B2RUR3 [1191-1210]
B9EHN0	[K].NFPNAIEHTLQWAR.[D]	B9EHN0 [636-649]
P61290	[K].SNQQLVDIIEK.[V]	P61290 [111-121]
Q5EG47	[RK].TSCGSPNYAAPEVISGR.[L]	Q5EG47 [183-199]
P62960	[R].NYQQNYQNSESGEK.[N]	P62960 [155-168]
Q3TIV3; P11103	[R].GGSDDSSKDPIDVNYEK.[L]	Q3TIV3 [780-796]; P11103 [779-795]
Q66JR7	[R].LSGTGSAGATIR.[L]	Q66JR7 [532-543]
P05214; P68373; A0A0A0MQA5	[K].RAFVHWYVGEGMEEGEFSEAR.[E]	P05214 [402-422]; P68373 [402-422]; A0A0A0MQA5 [431-451]
Q9ERV1	[K].AFAFQASQDK.[V]	Q9ERV1 [227-236]
A2A5N3	[R].IVGTKPLYVALAQR.[K]	A2A5N3 [357-370]
Q8BVQ5	[R].IVALDLR.[G]	Q8BVQ5 [107-113]
P18760	[K].HELQANCYEEVK.[D]	P18760 [133-144]
Q8N7N5	[R].WQALPALR.[E]	Q8N7N5 [146-153]
Q8BH30	[K].EAAWAITNATSGGTPEQIR.[Y]	Q8BH30 [397-415]
Q3V117	[R].KPASFMTSICDER.[G]	Q3V117 [836-848]
Q8BVQ5	[R].GLSNLFLSCPIPK.[L]	Q8BVQ5 [304-316]
P14211	[R].CKDDEFTHLYTLIVRPDNTYEVK.[I]	P14211 [163-185]
Q571J8	[K].IIDKTQLNSSSLQK.[L]	Q571J8 [87-100]
Q3V1Z7	[R].ELLIIGGVAAR.[D]	Q3V1Z7 [320-330]
Q9D0E1	[R].MGAGLGHGMDR.[V]	Q9D0E1 [418-428]
D3YWJ3	[K].KLLMMAGIDDCYTSAR.[G]	D3YWJ3 [212-227]
Q99J95	[R].NPATTNQTEFER.[V]	Q99J95 [359-370]
P53996	[R].CGETGHVAINCSK.[T]	P53996 [141-153]
Q7TNC4	[K].VEQLGAEGNVEESQK.[V]	Q7TNC4 [140-154]
P35979	[K].HSGNITFDEIVNIAR.[Q]	P35979 [100-114]
Q3URD3	[K].QDIQHLR.[K]	Q3URD3 [514-520]
B2RQH0	[K].KLADISLGK.[E]	B2RQH0 [778-786]
Q6ZWV7	[K].QLDDLKVELSQLR.[V]	Q6ZWV7 [20-32]
Q61781	[R].ADLEMQIESLKEELAYLKK.[N]	Q61781 [239-257]
Q3TL71	[K].RPAEDMEEEQAFKR.[S]	Q3TL71 [22-35]
Q03265	[K].AVDSLVPIGR.[G]	Q03265 [195-204]
Q3TIX6	[K].SINQQSGAHVELQR.[N]	Q3TIX6 [379-392]
P19096	[K].VLEALLPLK.[S]	P19096 [2376-2384]
Q99LX5	[R].EALLAALGYK.[N]	Q99LX5 [76-85]
P35585	[R].YITQNGDYQLR.[T]	P35585 [411-421]
P62301	[K].GLAPDLPEDLYHLIK.[K]	P62301 [79-93]
Q3U3Q1	[K].AIVSSSNQALLR.[Q]	Q3U3Q1 [346-357]
Q8BP48	[K].LGIQGSYFCSQECFK.[G]	Q8BP48 [28-42]
Q3UJP8	[K].AFAHITGGGLLENIPR.[V]	Q3UJP8 [677-692]
Q9CWJ9	[R].DVSELTGFPEMLGGR.[V]	Q9CWJ9 [50-64]
O88569	[R].NMGGPYGGGNYGPGGSGGSGGYGGR.[S]	O88569 [326-350]
Q3UJI2	[K].HPAKPDPSGECNPDLR.[L]	Q3UJI2 [156-171]
F8WIV5	[K].GISPVPINLR.[V]	F8WIV5 [114-123]
G3X9M0	[K].GSPLGEVVEQGLTR.[V]	G3X9M0 [217-230]
Q9DBJ1	[R].KAMEAVAAQGK.[VA]	Q9DBJ1 [241-251]
Q9R0H5; E9Q1Z0; P50446; P04104; Q6IME9; Q8BGZ7; Q8VED5; P07744; P11679; Q6IFZ8; Q32P04; B2RTP7	[KR].FASFIDK.[V]	Q9R0H5 [142-148]; E9Q1Z0 [154-160]; P50446 [163-169]; P04104 [199-205]; Q6IME9 [145-151]; Q8BGZ7 [161-167]; Q8VED5 [150-156]; P07744 [157-163]; P11679 [108-114]; Q6IFZ8 [163-169]; Q32P04 [173-179]; B2RTP7 [210-216]
P56399	[K].IFQNAPTDPTQDFSTQVAK.[L]	P56399 [361-379]
P48036	[K].NFATSLYSMIK.[G]	P48036 [289-299]
Q9DCJ5	[K].VKTDRPLPENPYHSR.[A]	Q9DCJ5 [131-145]
Q9DBG7	[K].LIDDVHR.[L]	Q9DBG7 [82-88]
Q80U89	[R].CNEPAVWSQLAK.[A]	Q80U89 [1112-1123]
E9Q3B5	[K].LLNYAPLEK.[-]	E9Q3B5 [59-67]
B7U582; B2CSK2	[RK].FDLTGIPPAPR.[G]	B7U582 [462-472]; B2CSK2 [461-471]
A2AFQ0	[R].LGSSGLGSASSIQAAVR.[Q]	A2AFQ0 [3752-3768]
Q3UAD6	[R].LTESPCALVASQYGWSGNMER.[I]	Q3UAD6 [640-660]
J3QNG0	[K].FAELVYTGFWHSPECEFVR.[H]	J3QNG0 [317-335]
Q80X90	[R].GQHVTGSPFQFTVGPLGEGGAHK.[V]	Q80X90 [2173-2195]
Q9D1P4	[K].FQEHIIQAPKPVEAIK.[R]	Q9D1P4 [92-107]
P50516	[R].TALVANTSNMPVAAR.[E]	P50516 [309-323]
B2RWX0	[R].IQLELNQVK.[S]	B2RWX0 [1568-1576]
Q8CGC4	[K].FEGDFDFESANAQFNR.[E]	Q8CGC4 [249-264]
A0A097PUG4	[K].VYACEVTHQGLSSPVTK.[S]	A0A097PUG4 [215-231]
P09103	[K].HNQLPLVIEFTEQTAPK.[I]	P09103 [233-249]
Q6TDU8	[K].LVLSLIEK.[V]	Q6TDU8 [142-149]
Q3UAD6	[R].VFITDDFHDMMPK.[Y]	Q3UAD6 [416-428]
P50446; Q6IFZ8	[K].QCANLQAAIADAEQR.[G]	P50446 [390-404]; Q6IFZ8 [390-404]
P62960	[R].NYQQNYQNSESGEKNEGSESAPEGQAQQR.[R]	P62960 [155-183]
Q3TI05	[R].AQAALAVNISAAR.[G]	Q3TI05 [16-28]
Q6A0F1	[K].EDGAISTIVLR.[G]	Q6A0F1 [375-385]
P47856	[K].LATELYHQK.[S]	P47856 [546-554]
M1VMF6	[R].DITLFHAMDTLHK.[N]	M1VMF6 [248-260]
Q6F4J0	[K].DVFFYQADDEHYIPR.[A]	Q6F4J0 [49-63]
P11499	[K].KHLEINPDHPIVETLR.[Q]	P11499 [624-639]
E9QK41	[K].QHAALAAQSK.[A]	E9QK41 [614-623]
Q8BTM8	[K].IPEISIQDMTAQVTSPSGK.[T]	Q8BTM8 [2166-2184]
P27773	[K].RLAPEYEAAATR.[L]	P27773 [62-73]
Q3TVV6	[K].KDCEVVMMIGLPGAGK.[T]	Q3TVV6 [471-486]
Q61553	[K].VGKDELFALEQSCAQVVLQAANER.[N]	Q61553 [248-271]
G3X977	[K].IQPSGGTNINEALLR.[A]	G3X977 [384-398]
Q3UR00	[R].DSAWGTSDHSVSQPIMVQR.[R]	Q3UR00 [174-192]
Q6R0H7	[RK].ILLLGAGESGK.[S]	Q6R0H7 [782-792]
P63038	[K].TLNDELEIIEGMK.[F]	P63038 [206-218]
P27773	[K].VDCTANTNTCNK.[Y]	P27773 [83-94]
Q66K07	[R].EANLQALIATGGDINAAIER.[L]	Q66K07 [556-575]
Q69ZX8	[K].NQEYICTQDYQQLYGTR.[C]	Q69ZX8 [65-81]
Q05A36	[R].LAALGLDDPSPAEPGAPALR.[A]	Q05A36 [48-67]
B1AY10	[K].LCHEGDCGPCSR.[T]	B1AY10 [638-649]
P62715	[K].SPDTNYLFMGDYVDR.[G]	P62715 [75-89]
Q8CIP4	[R].FLVLNPAK.[R]	Q8CIP4 [290-297]
P61082	[K].EAAEVLQNNR.[R]	P61082 [148-157]
Q99KI0	[K].EGWPLDIR.[V]	Q99KI0 [371-378]
A0A0A0MQF6	[R].GAAQNIIPASTGAAK.[A]	A0A0A0MQF6 [225-239]
P00493	[K].VFIPHGLIMDR.[T]	P00493 [35-45]
Q3U182	[K].QFSPTMSPTLSSITQGVPLDTSK.[L]	Q3U182 [455-477]
P19324	[K].LFYADHPFIFLVR.[D]	P19324 [380-392]
Q63932	[R].ISELGAGNGGVVTK.[A]	Q63932 [75-88]
P56399	[K].IVILPDYLEIAR.[D]	P56399 [122-133]
Q8C338	[K].SIEDFAHSSFQMALSK.[G]	Q8C338 [188-203]
E9PV22	[R].NALGPGLSPELGPLPALR.[V]	E9PV22 [109-126]
P05214; P68373; A0A0A0MQA5	[K].RAFVHWYVGEGMEEGEFSEAR.[E]	P05214 [402-422]; P68373 [402-422]; A0A0A0MQA5 [431-451]
Q3TXM9	[R].VLVSGLPPSGSWQDLK.[D]	Q3TXM9 [114-129]
Q8C1W9	[R].KYAALYQPLFDK.[R]	Q8C1W9 [94-105]
B9EHN0	[K].VLGPYTFSICDTSNFSDYIR.[G]	B9EHN0 [269-288]
I6L9H1	[R].FSSSTEQSSASR.[L]	I6L9H1 [220-231]
O54984	[R].LLNFPTIVER.[G]	O54984 [176-185]
Q3TED1	[K].HIGYDDSSK.[G]	Q3TED1 [89-97]
A2AWI7	[R].QTEVLLQPNPSAR.[V]	A2AWI7 [59-71]
A6ZI44	[K].IGEHTPSALAIMENANVLAR.[Y]	A6ZI44 [208-227]
Q80X90	[K].AHGPGLEGGLVGKPAEFTIDTK.[G]	Q80X90 [1045-1066]
P47856	[R].GALTVGITNTVGSSISR.[E]	P47856 [456-472]
Q9CQV8	[K].AVTEQGHELSNEER.[N]	Q9CQV8 [30-43]
Q3UDJ7; Q7TPR4	[RK].LASDLLEWIR.[R]	Q3UDJ7 [302-311]; Q7TPR4 [282-291]
Q9JHU4	[R].QNISPDKIPWSALK.[T]	Q9JHU4 [4229-4242]
A2AEY2	[R].FTAVEDQYYCVDCYK.[N]	A2AEY2 [200-214]
	[R].AYATYPK.[E]
P30416	[K].FSFDLGK.[G]	P30416 [77-83]
Q810D6	[K].GQVEVFALR.[R]	Q810D6 [173-181]
E9Q557	[R].ALCDYKQDQK.[I]	E9Q557 [477-486]
P20152	[R].QDVDNASLAR.[L]	P20152 [208-217]
B1AX58	[K].AYFHLLNQIAPK.[G]	B1AX58 [310-321]
Q3TI61	[R].FGGSGSQVDSAR.[M]	Q3TI61 [358-369]
Q64727	[K].MLGQMTDQVADLR.[A]	Q64727 [327-339]
Q8BTM8	[R].LSPFMADIR.[E]	Q8BTM8 [656-664]
Q99PT1	[K].IDKTDYMVGSYGPR.[A]	Q99PT1 [139-152]
Q3V117	[R].SAYDSTMETMNYAQIR.[T]	Q3V117 [577-592]
Q80TP8	[R].LLGYVATLK.[D]	Q80TP8 [543-551]
P32067	[K].EGIILFK.[E]	P32067 [269-275]
Q3TWM2	[K].EGIAQTVFLGLNR.[S]	Q3TWM2 [113-125]
E9Q1Z0; P50446; Q8BGZ7; Q8VED5; P07744; Q32P04; B2RTP7	[RK].EQIKTLNNK.[F]	E9Q1Z0 [145-153]; P50446 [154-162]; Q8BGZ7 [152-160]; Q8VED5 [141-149]; P07744 [148-156]; Q32P04 [164-172]; B2RTP7 [201-209]
O08919	[K].SVLWVSADGLR.[V]	O08919 [116-126]
Q9JHU4	[K].NYMSNPSYNYEIVNR.[A]	Q9JHU4 [3368-3382]
P80313	[K].TFSYAGFEMQPK.[K]	P80313 [219-230]
Q69ZX8	[R].ASSPGYIDSPTYSR.[Q]	Q69ZX8 [371-384]
F6VW30	[R].YLAEVACGDDR.[K]	F6VW30 [186-196]
Q6PAC3	[K].SIYSQIQEQR.[V]	Q6PAC3 [399-408]
Q99MR6	[K].EVAFFNNFLTDAK.[R]	Q99MR6 [745-757]
E9Q1Z0; P50446; Q6IME9; Q32P04	[K].KDVDAAYMNK.[V]	E9Q1Z0 [250-259]; P50446 [261-270]; Q6IME9 [243-252]; Q32P04 [271-280]
P80313	[K].CAMTALSSK.[L]	P80313 [158-166]
P24452	[R].EVQGNESDLFMSYFPR.[G]	P24452 [97-112]
Q3TVV6	[K].KDCEVVMMIGLPGAGK.[T]	Q3TVV6 [471-486]
Q3UWT6	[K].LAQQYYLVYQEPIPTAQLVQR.[V]	Q3UWT6 [93-113]
P14211	[K].HEQNIDCGGGYVK.[L]	P14211 [99-111]
F6VW30	[K].AVTEQGAELSNEER.[N]	F6VW30 [86-99]
P35486	[K].GPILMELQTYR.[Y]	P35486 [278-288]
Q3TVV6	[K].MCLFAGFQR.[K]	Q3TVV6 [569-577]
Q8C338	[R].FKDIFQEIYDK.[K]	Q8C338 [223-233]
Q3UDJ7; Q7TPR4	[K].ASIHEAWTDGK.[E]	Q3UDJ7 [423-433]; Q7TPR4 [403-413]
Q9WUP7	[R].LYELDGLR.[E]	Q9WUP7 [175-182]
P38647	[K].VLENAEGAR.[T]	P38647 [77-85]
Q3UI84	[R].ELFGPELFR.[L]	Q3UI84 [94-102]
P61082	[K].DINELNLPK.[T]	P61082 [37-45]
Q9WVA3	[R].VLVWDLR.[N]	Q9WVA3 [159-165]
E9PY39	[R].WTGMIIGPPR.[TV]	E9PY39 [272-281]
Q8C2Q7	[R].GAYGGGYGGYDDYNGYNDGYGFGSDR.[F]	Q8C2Q7 [234-259]
P47857	[R].VLVVHDGFEGLAK.[G]	P47857 [433-445]
Q9D2G2	[K].LGFMSAFVK.[A]	Q9D2G2 [279-287]
Q61781	[K].VVSTHEQVLR.[T]	Q61781 [472-481]
P60766	[K].QKPITPETAEK.[L]	P60766 [134-144]
Q8BK67	[K].AVQDLCGWR.[I]	Q8BK67 [421-429]
E9Q8Z8	[R].IYISLLK.[E]	E9Q8Z8 [667-673]
Q6ZQ38	[R].AVAALLTIPEAEK.[S]	Q6ZQ38 [1179-1191]
Q60749	[K].KDDEENYLDLFSHK.[N]	Q60749 [139-152]
Q3UJS6	[R].LYGPTNFSPIINHVAR.[F]	Q3UJS6 [391-406]
Q02257	[K].VLSVCPSNKPAIVEAGGMQALGK.[H]	Q02257 [337-359]
P63323	[R].KVVGCSCVVVK.[D]	P63323 [102-112]
Q642L7	[K].IQDKEGIPPDQQR.[LV]	Q642L7 [30-42]
Q80X68	[R].VVPGYGHAVLR.[K]	Q80X68 [341-351]
Q80U89	[K].QLPLVKPYLR.[S]	Q80U89 [1453-1462]
Q9D7X8	[R].SYLMTNYESAPPSPQYK.[K]	Q9D7X8 [124-140]
O55023	[K].SLLVTELGSSR.[K]	O55023 [157-167]
E9Q557	[R].QMGQPCDAYQK.[R]	E9Q557 [142-152]
Q3UIF3; P11499	[R].YESLTDPSKLDSGK.[E]	Q3UIF3 [61-74]; P11499 [56-69]
P47757	[R].KLEVEANNAFDQYR.[D]	P47757 [95-108]
P53996	[K].CYSCGEFGHIQK.[D]	P53996 [120-131]
P29341	[K].VDEAVAVLQAHQAK.[E]	P29341 [607-620]
P52189	[R].NGQAHVPR.[R]	P52189 [7-14]
Q3U8B3	[K].VVPIASLTPYQSK.[W]	Q3U8B3 [214-226]
Q3TIX6	[K].AEGFVDALHR.[V]	Q3TIX6 [16-25]
Q60597	[K].NQGYYDYVKPR.[L]	Q60597 [962-972]
P53026	[R].EVLHGNQR.[K]	P53026 [16-23]
P51150	[K].EAINVEQAFQTIAR.[N]	P51150 [158-171]
P47856	[R].EILETLIK.[G]	P47856 [18-25]
O70456	[R].YEDMAAFMK.[S]	O70456 [19-27]
P80315	[K].VVSQYSSLLSPMSVNAVMK.[V]	P80315 [175-193]
B2RXY7	[K].ILLNACCPGWVR.[T]	B2RXY7 [221-232]
Q99K87	[R].GLELIASENFCSR.[A]	Q99K87 [70-82]
Q61214	[K].HINEVYYAK.[K]	Q61214 [106-114]
Q9D7J9	[K].QLPQDLR.[T]	Q9D7J9 [258-264]
P31938	[K].ISELGAGNGGVVFK.[V]	P31938 [71-84]
E9PY39	[R].WTGMIIGPPR.[TV]	E9PY39 [272-281]
Q3UAD6	[R].LTESPCALVASQYGWSGNMER.[I]	Q3UAD6 [640-660]
Q9JHU4	[R].IQFVGACNPPTDPGR.[K]	Q9JHU4 [2704-2718]
Q569Z5	[R].QTVMFSATFPR.[A]	Q569Z5 [555-565]
Q99PT1	[K].TDYMVGSYGPR.[A]	Q99PT1 [142-152]
P47857; P12382	[R].TFVLEVMGR.[H]	P47857 [202-210]; P12382 [202-210]
E9Q557	[R].LPVEEAYKR.[G]	E9Q557 [2322-2330]
Q61206	[K].IIVLGLLPR.[G]	Q61206 [134-142]
Q7TQG1	[R].SPSQGSYSR.[A]	Q7TQG1 [459-467]
Q61074	[K].QLIVANAGDSR.[C]	Q61074 [337-347]
P60335	[R].VMTIPYQPMPASSPVICAGGQDR.[C]	P60335 [178-200]
A2A5Y6	[K].IGSTENLKHQPGGGK.[V]	A2A5Y6 [568-582]
E9Q070	[R].AGAIAPCEVTVPAQNTGLGPEK.[T]	E9Q070 [113-134]
F6YVP7	[R].VITIMQNPR.[Q]	F6YVP7 [67-75]
F6ZFU0	[R].SIQLDGLVWGASK.[L]	F6ZFU0 [491-503]
Q01853	[K].EMVELPLR.[H]	Q01853 [218-225]
A2A5Y6	[K].IGSTENLKHQPGGGKVQIINK.[KE]	A2A5Y6 [568-588]
Q3TQX5	[R].QSSGASSSSFSSSR.[A]	Q3TQX5 [604-617]
P61971	[K].NINDAWVCTNDMFR.[L]	P61971 [107-120]
P52480	[K].KGVNLPGAAVDLPAVSEKDIQDLK.[F]	P52480 [207-230]
Q3UIF3; P11499	[K].HFSVEGQLEFR.[A]	Q3UIF3 [329-339]; P11499 [320-330]
Q61781	[R].TMQNLEIELQSQLSMK.[A]	Q61781 [343-358]
D3YVN7	[R].GITINAAHVEYSTAAR.[H]	D3YVN7 [105-120]
A0A0A0MQF6	[K].LISWYDNEYGYSNR.[V]	A0A0A0MQF6 [334-347]
P20029	[K].TFAPEEISAMVLTK.[M]	P20029 [140-153]
Q9CWJ9	[K].AFTHTAQYDEAISDYFR.[K]	Q9CWJ9 [178-194]
P26041	[R].ISQLEMAR.[K]	P26041 [428-435]
P42128	[R].QLTLSGIYAHITK.[H]	P42128 [311-323]
Q3TVZ1	[R].FSTVAGESGSADTVR.[D]	Q3TVZ1 [113-127]
P70168	[K].VQHQDALQISDVVMASLLR.[M]	P70168 [595-613]
Q5EBQ6	[R].KFLDGIYVSEK.[G]	Q5EBQ6 [174-184]
Q32P04	[R].NTKHEISEMNR.[M]	Q32P04 [375-385]
Q04207	[R].TPPYADPSLQAPVR.[V]	Q04207 [254-267]
P50396	[R].KFDLGQDVIDFTGHALALYR.[T]	P50396 [174-193]
Q9ERD7	[R].ISVYYNEASSHK.[Y]	Q9ERD7 [47-58]
B2RWX0	[KR].VLNASAIPEGQFIDSK.[K]	B2RWX0 [731-746]
Q3UXP2	[R].AAGVVLEMIR.[E]	Q3UXP2 [55-64]
Q3TIX6	[K].MVGFIIGR.[G]	Q3TIX6 [88-95]
F6ZHD8	[K].IVLDSDAAEYGGHQR.[L]	F6ZHD8 [648-662]
Q99PT1	[K].IDKTDYMVGSYGPR.[A]	Q99PT1 [139-152]
P04627	[R].IGTGSFGTVFR.[G]	P04627 [314-324]
Q7TMK9	[R].LMMDPLTGLNR.[G]	Q7TMK9 [193-203]
P11499; Q3UAD6	[R].ELISNASDALDKIR.[LY]	P11499 [42-55]; Q3UAD6 [103-116]
Q8C1W9	[K].EAATVEELNPK.[G]	Q8C1W9 [147-157]
P34022	[R].AWVWNTHADFADECPKPELLAIR.[F]	P34022 [119-141]
P26443	[K].GFIGPGIDVPAPDMSTGER.[E]	P26443 [213-231]
Q02257	[R].HPEAEMAQNSVR.[L]	Q02257 [466-477]
Q3UZH3	[K].IVGAPMHDLLLWNNATVTTCHSK.[T]	Q3UZH3 [178-200]
P60843	[R].GIDVQQVSLVINYDLPTNR.[E]	P60843 [335-353]
A0A068BFR3	[R].GAVGALLVYDIAK.[H]	A0A068BFR3 [83-95]
Q9WV02	[R].IVEVLLMK.[D]	Q9WV02 [34-41]
P61759	[R].LHLGIPEAVFVEDVDSFMK.[Q]	P61759 [20-38]
Q91YC8	[R].IEVQDTSGGTTALRPSASTQALSSSVSSSK.[L]	Q91YC8 [740-769]
Q7TPR4	[R].LAILGIHNEVSK.[I]	Q7TPR4 [566-577]
Q3UA53	[K].HTGCCGDNDPIDVCEIGSK.[V]	Q3UA53 [110-128]
Q9Z1N5	[K].HFILDECDK.[M]	Q9Z1N5 [192-200]
E9QK41	[K].IFPYEMLMVTNR.[G]	E9QK41 [798-809]
P99024	[K].FWEVISDEHGIDPTGTYHGDSDLQLDR.[I]	P99024 [20-46]
Q02257	[R].ISEDKNPDYR.[K]	Q02257 [652-661]
Q3ULG4	[K].LTAFVNTLNGK.[D]	Q3ULG4 [153-163]
Q9CWK0	[K].CMQLTDFILK.[F]	Q9CWK0 [54-63]
Q3TL71	[R].NLPLPPPPPPR.[G]	Q3TL71 [306-316]
Q9JJI8	[R].KIEEIKDFLLTAR.[R]	Q9JJI8 [4-16]
P60762	[K].QLFYLPAK.[K]	P60762 [219-226]
Q9JMC3	[K].LISQAYEVLSDPK.[K]	Q9JMC3 [47-59]
Q3UA53	[K].DPLNPIKQDVK.[K]	Q3UA53 [64-74]
P50516	[R].TALVANTSNMPVAAR.[E]	P50516 [309-323]
Q11011	[R].LGLQNDLFSLAR.[A]	Q11011 [617-628]
Q60597	[K].THLTELQR.[F]	Q60597 [1001-1008]
Q3U8M3	[R].AVGIWHCGSCMK.[T]	Q3U8M3 [51-62]
P63038	[R].GVMLAVDAVIAELKK.[Q]	P63038 [143-157]
Q8VH51	[R].AAAMANNLQK.[G]	Q8VH51 [235-244]
Q3UZG3	[R].SSGSPYGGGYGSGGGSGGYGSR.[R]	Q3UZG3 [356-377]
B2CSK2	[K].QTQIFTTYSDNQPGVLIQVYEGER.[A]	B2CSK2 [426-449]
Q7TPR4	[K].QFGAQANVIGPWIQTK.[M]	Q7TPR4 [634-649]
E9Q557	[R].NHYNEEMSNLR.[N]	E9Q557 [1209-1219]
P62334	[K].LSDGFNGADLR.[N]	P62334 [334-344]
Q8C266	[R].QASPNIVIALAGNK.[A]	Q8C266 [122-135]
P54775	[K].AVAHHTTAAFIR.[V]	P54775 [218-229]
Q03141; Q571J8	[R].QIVSAVQYCHQK.[RFC]	Q03141 [161-172]; Q571J8 [162-173]
Q99K64	[R].ADLVFIIDSSRSVNTHDYAK.[V]	Q99K64 [56-75]
Q9JK92	[R].LSSAWPGTLR.[S]	Q9JK92 [56-65]
Q68FF6	[R].LLNASAYR.[L]	Q68FF6 [713-720]
P38647	[K].SQVFSTAADGQTQVEIK.[V]	P38647 [469-485]
Q9QY23	[R].HTTEAAAGALQNITAGDR.[R]	Q9QY23 [623-640]
Q99KI0	[R].VGLIGSCTNSSYEDMGR.[S]	Q99KI0 [379-395]
Q8K1N2	[K].SPNPLLTFSVK.[T]	Q8K1N2 [1204-1214]
Q5FW97	[K].FTASAGIQVVGDDLTVTNPK.[R]	Q5FW97 [307-326]
A2AFQ0	[R].LLVGNDDVHIIAR.[S]	A2AFQ0 [2607-2619]
Q6ZQK2	[K].SWVNQMESQTGEASK.[L]	Q6ZQK2 [1121-1135]
O88532	[K].ISCAGPQTYK.[E]	O88532 [338-347]
P07744	[R].AQYEDIAR.[K]	P07744 [322-329]
Q3TL33	[R].HLVYESDQNK.[DV]	Q3TL33 [272-281]
P58252	[K].EGALCEENMR.[G]	P58252 [689-698]
Q3TQX5	[R].DLMACAQTGSGK.[T]	Q3TQX5 [219-230]
Q20BD0	[K].EVYQQQQYGSGGR.[G]	Q20BD0 [238-250]
P35979	[R].CTGGEVGATSALAPK.[I]	P35979 [17-31]
Q3TJG6	[K].SKLTFSCLGGSDNFK.[H]	Q3TJG6 [34-48]
Q3UIJ2	[K].IVLTNPVCTEVGEK.[I]	Q3UIJ2 [427-440]
Q80X90	[R].IGNLQTDLSDGLR.[L]	Q80X90 [37-49]
Q569Z5	[K].LLVATSVAAR.[G]	Q569Z5 [672-681]
P17918	[K].FSASGELGNGNIK.[L]	P17918 [169-181]
Q3U8X1	[R].VIGLSSDLQQVGGASAR.[I]	Q3U8X1 [266-282]
Q6ZQK2	[R].QSGQTDPLQKEEVQAGVDAANSAAQQYQR.[R]	Q6ZQK2 [383-411]
P47962	[K].HIMGQNVADYMR.[Y]	P47962 [198-209]
Q5SS40	[K].LICCDILDVLDK.[H]	Q5SS40 [95-106]
P00493	[R].SIPMTVDFIR.[L]	P00493 [92-101]
P12382	[R].IMEVIDAITTTAQSHQR.[T]	P12382 [185-201]
Q9R0H5	[K].SKAEAEALYQTK.[FL]	Q9R0H5 [316-327]
Q61990; P60335	[R].ESTGAQVQVAGDMLPNSTER.[A]	Q61990 [125-144]; P60335 [125-144]
Q6A065	[R].ISQDLALIAR.[E]	Q6A065 [1295-1304]
P38647	[K].SDIGEVILVGGMTR.[M]	P38647 [378-391]
Q9JHW2	[R].AVDNQVYVATASPAR.[D]	Q9JHW2 [196-210]
Q3TLP8	[K].LTPITYPQGLAMAK.[E]	Q3TLP8 [153-166]
Q8BTM8	[R].VNVGAGSHPNK.[V]	Q8BTM8 [761-771]
Q8BLY1	[R].SYESMCEYQR.[A]	Q8BLY1 [61-70]
P62830	[R].LPAAGVGDMVMATVK.[K]	P62830 [52-66]
Q3TIP8	[K].NSNPALNDNLEK.[G]	Q3TIP8 [120-131]
P09103	[R].LITLEEEMTK.[Y]	P09103 [319-328]
P97461	[K].WSTDDVQINDISLQDYIAVK.[E]	P97461 [23-42]
Q5SS40	[K].HLIPAANTGESK.[V]	Q5SS40 [107-118]
P52480	[R].EAEAAIYHLQLFEELR.[R]	P52480 [384-399]
Q9D6R2	[K].IEAACFATIK.[D]	Q9D6R2 [327-336]
P08249	[R].VNVPVIGGHAGK.[T]	P08249 [192-203]
Q3TIH9	[R].IEINFPAEYPFKPPK.[I]	Q3TIH9 [53-67]
Q9WVA4	[R].TLMNLGGLAVAR.[D]	Q9WVA4 [128-139]
Q3THH1	[K].AATALKDVVK.[V]	Q3THH1 [73-82]
P52480	[R].AEGSDVANAVLDGADCIMLSGETAK.[G]	P52480 [343-367]
E9QKK4	[R].ATVPYQLLR.[G]	E9QKK4 [56-64]
Q9D0E1	[R].MGPLGLDHMASSIER.[M]	Q9D0E1 [456-470]
Q3TVV6	[R].GYFEYIEENK.[Y]	Q3TVV6 [232-241]
D9J302	[R].GPFLVALGK.[S]	D9J302 [447-455]
Q64727	[K].STVEGIQASVK.[T]	Q64727 [656-666]
Q8C1W9	[K].YAALYQPLFDK.[R]	Q8C1W9 [95-105]
Q02257	[R].TMQNTSDLDTAR.[C]	Q02257 [192-203]
Q3TIV3; P11103	[R].MAIMVQSPMFDGK.[V]	Q3TIV3 [35-47]; P11103 [35-47]
P26041	[K].SGYLAGDK.[L]	P26041 [144-151]
Q52L97	[R].EKQPPIDNIIR.[A]	Q52L97 [107-117]
O88569	[R].NMGGPYGGGNYGPGGSGGSGGYGGR.[S]	O88569 [326-350]
Q7TQG1	[R].SIHEVDISNLEAALR.[A]	Q7TQG1 [992-1006]
B2RTM0	[K].TVTAMDVVYALKR.[Q]	B2RTM0 [81-93]
P68373	[K].AYHEQLTVAEITNACFEPANQMVK.[C]	P68373 [281-304]
P51150	[K].VIILGDSGVGK.[T]	P51150 [11-21]
G3UZX4	[K].YQQGDFGYCPR.[V]	G3UZX4 [101-111]
Q9JHU4	[R].LGGSPFGPAGTGK.[T]	Q9JHU4 [1898-1910]
P99027	[R].YVASYLLAALGGNSSPSAK.[D]	P99027 [3-21]
Q3ULG4	[R].LQAQQDAVNIVCHSK.[T]	Q3ULG4 [26-40]
Q9WVA4	[RK].GASQAGMTGYGMPR.[Q]	Q9WVA4 [183-196]
Q3TFQ8	[R].VLYPNDNFFEGK.[E]	Q3TFQ8 [279-290]
Q66JR7	[K].LSLCGEESFGTGSDHIR.[E]	Q66JR7 [399-415]
A0A087WQS2	[R].LMELFPANK.[Q]	A0A087WQS2 [247-255]
Q80V08	[K].KSAEFLLHMLK.[N]	Q80V08 [96-106]
Q9QY23	[K].LFNHANQEVQR.[H]	Q9QY23 [369-379]
Q9R1P4	[R].IHQIEYAMEAVK.[Q]	Q9R1P4 [19-30]
Q9EPL8	[K].QLQDIATLADQR.[R]	Q9EPL8 [991-1002]
Q9CY58	[K].SAAQAAAQTNSNAAGK.[Q]	Q9CY58 [53-68]
O08919	[R].LSHAVGCAFAACLER.[K]	O08919 [184-198]
P13020	[R].QTQVSVLPEGGETPLFK.[Q]	P13020 [372-388]
B2CSK2; P17879	[K].ATAGDTHLGGEDFDNR.[L]	B2CSK2 [223-238]; P17879 [221-236]
P80313	[R].VHTVEDYQAIVDAEWNILYDKLEK.[I]	P80313 [257-280]
P24527	[K].ELVALMSAIR.[D]	P24527 [166-175]
P70698	[K].YILVTGGVISGIGK.[G]	P70698 [3-16]
H3BJW3	[K].QFLSQFEMQSR.[K]	H3BJW3 [162-172]
Q9D818	[R].AFLQSLR.[T]	Q9D818 [27-33]
Q9Z1F9	[R].VLVVGAGGIGCELLK.[N]	Q9Z1F9 [20-34]
Q99LX0	[K].GAEEMETVIPVDVMR.[R]	Q99LX0 [13-27]
Q80X90; Q8VHX6	[K].GAGTGGLGLTVEGPCEAK.[I]	Q80X90 [1067-1084]; Q8VHX6 [1090-1107]
Q5SVP3	[K].TKVEAFQTTISK.[Y]	Q5SVP3 [155-166]
P80316	[R].IADGYEQAAR.[I]	P80316 [133-142]
O70569	[R].DESSPYAAMLAAQDVAQR.[C]	O70569 [67-84]
Q7TQG1	[R].IEISCALATEASR.[R]	Q7TQG1 [1117-1129]
P39876	[K].YQYLLTGR.[V]	P39876 [100-107]
Q01853	[R].LGDVISIQPCPDVK.[Y]	Q01853 [96-109]
Q64727	[K].KIDAAQNWLADPNGGPEGEEQIR.[G]	Q64727 [387-409]
A1A4T2	[R].SLLLSVNAR.[G]	A1A4T2 [165-173]
Q3TF87	[R].YGISSMIQSQEKPDR.[V]	Q3TF87 [29-43]
Q3TFQ8	[RK].VIFLENYR.[V]	Q3TFQ8 [643-650]
Q9DBY8	[K].GPELLNMYVGESER.[A]	Q9DBY8 [647-660]
A0T1J8	[R].QQILQEMR.[K]	A0T1J8 [1491-1498]
P97371	[K].APLDIPVPDPVKEK.[E]	P97371 [59-72]
Q8BK67	[K].GNLYSFGCPEYGQLGHNSDGK.[F]	Q8BK67 [271-291]
Q80X90	[K].FNGSHVVGSPFK.[V]	Q80X90 [2361-2372]
P13020	[K].EPGLQIWR.[V]	P13020 [63-70]
Q3UVM5	[RK].SVTGTPYWMSPEVISGEGYGR.[K]	Q3UVM5 [526-546]
O70194	[R].YNFPNPNPFVEDDMDKNEIASVAYR.[Y]	O70194 [335-359]
Q3U740	[R].HGLLVPNNTTDQELQHIR.[N]	Q3U740 [68-85]
Q9DBF1	[R].GEVITTYCPANNEPIAR.[V]	Q9DBF1 [63-79]
Q64727	[R].IPTISTQLK.[I]	Q64727 [988-996]
P47962	[K].VGLTNYAAAYCTGLLLAR.[R]	P47962 [90-107]
Q7TPR4	[K].ICDQWDNLGALTQK.[R]	Q7TPR4 [479-492]
E9Q1Z0; P50446; Q8BGZ7; P11679	[KR].EYQELMNVK.[L]	E9Q1Z0 [425-433]; P50446 [436-444]; Q8BGZ7 [434-442]; P11679 [379-387]
P63101	[K].SVTEQGAELSNEER.[N]	P63101 [28-41]
F7DEU6	[K].QLLCGAAVGTR.[E]	F7DEU6 [267-277]
P12382	[K].AIGVLTSGGDAQGMNAAVR.[A]	P12382 [17-35]
P83741	[K].IGDLGLATLK.[R]	P83741 [366-375]
Q9JMH6	[R].VVGFHVLGPNAGEVTQGFAAALK.[C]	Q9JMH6 [549-571]
Q3TFF0	[K].EISFAYEVLSNPEK.[R]	Q3TFF0 [49-62]
O09159	[R].LLVDDDR.[G]	O09159 [818-824]
Q3TLP8	[R].AVLCPPPVK.[K]	Q3TLP8 [194-202]
Q9WVA4	[RK].GASQAGMTGYGMPR.[Q]	Q9WVA4 [183-196]
Q3UIF3; P11499	[K].HNDDEQYAWESSAGGSFTVR.[TA]	Q3UIF3 [154-173]; P11499 [149-168]
Q32P04	[K].MFFDAELSQMQTHVSDTSVVLSMDNNR.[S]	Q32P04 [299-325]
P50446; Q6IME9	[K].DVDAAYMNKVELQAK.[AV]	P50446 [262-276]; Q6IME9 [244-258]
P50516	[R].LAEMPADSGYPAYLGAR.[L]	P50516 [365-381]
Q80UT7	[R].LKVPPAINQFTQALDR.[Q]	Q80UT7 [78-93]
Q3TIV3; P11103	[K].NTHATTHNAYDLEVIDIFK.[I]	Q3TIV3 [820-838]; P11103 [819-837]
P80313	[K].LLDVVHPAAK.[T]	P80313 [68-77]
B1AY10	[K].SDGFGDFSCLK.[I]	B1AY10 [543-553]
Q9JMK2	[R].DVKPDNFLMGLGK.[K]	Q9JMK2 [128-140]
Q61781; Q9QWL7	[K].TEELNREVATNSELVQSGK.[S]	Q61781 [316-334]; Q9QWL7 [279-297]
Q8VDM6	[R].NYILDQTNVYGSAQR.[R]	Q8VDM6 [502-516]
Q11011	[R].SPVYLTVLK.[H]	Q11011 [746-754]
Q9Z2X1	[R].TEMDWVLK.[H]	Q9Z2X1 [91-98]
Q99KN2	[R].IWGTEGDSWICK.[S]	Q99KN2 [42-53]
Q6PD21	[K].GAEHLSLLYPVAVR.[T]	Q6PD21 [488-501]
Q00612	[R].GGYFDEFGIIR.[D]	Q00612 [247-257]
P51859	[K].CGDLVFAK.[M]	P51859 [12-19]
Q9ERR7	[R].FPQVQAFVR.[S]	Q9ERR7 [98-106]
D3Z3N4	[R].STGEAFVQFASK.[E]	D3Z3N4 [56-67]
Q3UK83	[R].NQGGYGGSSSSSSYGSGR.[R]	Q3UK83 [354-371]
Q9D0R2	[R].QVMVVPVGPTCDEYAQK.[V]	Q9D0R2 [619-635]
P51859	[K].GFSEGLWEIENNPTVK.[A]	P51859 [81-96]
Q8VDD5	[KR].QLLQANPILEAFGNAK.[T]	Q8VDD5 [210-225]
Q571M2	[R].AFSDPFVEAEK.[S]	Q571M2 [162-172]
Q3UBK2	[K].HPDASVNFSEFSK.[K]	Q3UBK2 [31-43]
Q00612	[R].VQPNEAVYTK.[M]	Q00612 [394-403]
E9QAZ2	[R].QLSALHR.[A]	E9QAZ2 [32-38]
A0A087WNT1	[K].AMLSGPGQFAENETNEVNFR.[E]	A0A087WNT1 [66-85]
Q9D0E1	[R].MGPAMGPALGAGIER.[M]	Q9D0E1 [591-605]
Q3THQ5	[K].EGLQNMEAR.[L]	Q3THQ5 [110-118]
B2RQC6	[R].LGGAVLSFSEATSSVQK.[G]	B2RQC6 [1987-2003]
P70698	[K].FSDSYASVIK.[A]	P70698 [310-319]
Q8C196	[K].GNDVLVIECNLR.[A]	Q8C196 [1248-1259]
Q3U4S9	[R].IEGLLAAFPK.[L]	Q3U4S9 [29-38]
Q3TJ21	[R].LGAQALLGAAK.[M]	Q3TJ21 [205-215]
P19324	[K].GVVEVTHDLQK.[H]	P19324 [308-318]
O70456	[R].YLAEVATGDDKKR.[I]	O70456 [130-142]
Q3UJV2	[K].FITHAPPGEFNEVFNDVR.[L]	Q3UJV2 [20-37]
A2AEY2	[K].QVIGTGSFFPK.[G]	A2AEY2 [134-144]
B9EIU1	[R].LNLNNTVLSK.[R]	B9EIU1 [426-435]
A0A0A0MQ97	[R].TVIAQHHVAPR.[T]	A0A0A0MQ97 [223-233]
Q571J7	[R].VVIFQQEQENK.[I]	Q571J7 [114-124]
Q7TMK9	[K].LYNNHEIR.[S]	Q7TMK9 [222-229]
Q8R050	[R].ENLSAAFSR.[Q]	Q8R050 [59-67]
Q3U4U6	[R].NLQDAMQVCR.[N]	Q3U4U6 [390-399]
Q80TP8	[K].LLTSYGFIQCSER.[Q]	Q80TP8 [88-100]
P63037	[K].ILEVHIDK.[G]	P63037 [207-214]
P31254; B9EHN0	[K].YFLVGAGAIGCELLK.[N]	P31254 [470-484]; B9EHN0 [471-485]
P50247	[K].WLNENAVEK.[V]	P50247 [310-318]
Q9D0E1	[R].MGPAMGPALGAGIER.[M]	Q9D0E1 [591-605]
Q99J77	[K].VGSGDTNNFPYLEK.[T]	Q99J77 [132-145]
P32921	[K].GIFGFTDSDCIGK.[I]	P32921 [269-281]
Q9Z2X1	[R].DLSYCLSGMYDHR.[Y]	Q9Z2X1 [263-275]
F8WHT3	[R].LLSFSPEEFPTLK.[A]	F8WHT3 [164-176]
Q7TMM9; P68372	[K].MSATFIGNSTAIQELFKR.[I]	Q7TMM9 [363-380]; P68372 [363-380]
Q3ULL5	[R].DYTYEELLNR.[V]	Q3ULL5 [171-180]
Q61753	[K].TLGILGLGR.[I]	Q61753 [147-155]
P50446; P04104; Q8BGZ7; Q8VED5; P11679; Q32P04; B2RTP7	[KR].YEDEINKR.[TA]	P50446 [242-249]; P04104 [278-285]; Q8BGZ7 [240-247]; Q8VED5 [230-237]; P11679 [185-192]; Q32P04 [252-259]; B2RTP7 [289-296]
P97350	[R].LDAEVPTR.[Y]	P97350 [466-473]
Q80U89	[R].KFDVNTSAVQVLIEHIGNLDR.[A]	Q80U89 [1084-1104]
P20152	[K].FADLSEAANR.[N]	P20152 [295-304]
Q9DBJ1	[K].AMEAVAAQGK.[VA]	Q9DBJ1 [242-251]
Q9QY23	[R].DLLYFDGLR.[K]	Q9QY23 [738-746]
Q9D6R2	[K].TPIAAGHPSMNLLLR.[K]	Q9D6R2 [101-115]
E9Q1Z0	[K].DVDAAYMNKVELEAK.[V]	E9Q1Z0 [251-265]
Q02257	[K].VLSVCPSNKPAIVEAGGMQALGK.[H]	Q02257 [337-359]
P38647	[K].LFEMAYK.[K]	P38647 [647-653]
A6ZI44	[K].VDKGVVPLAGTNGETTTQGLDGLSER.[C]	A6ZI44 [163-188]
P07356	[R].RAEDGSVIDYELIDQDAR.[E-]	P07356 [179-196]
Q8R1B4	[K].ELLGQGLLLR.[S]	Q8R1B4 [642-651]
Q6A0F1	[K].LATNAAVTVLR.[V]	Q6A0F1 [517-527]
Q5M9M5	[K].VNTLIRPDGEK.[K]	Q5M9M5 [124-134]
P63242	[K].KYEDICPSTHNMDVPNIKR.[N]	P63242 [68-86]
Q80X90	[R].GAGIGGLGITVEGPSESK.[I]	Q80X90 [1355-1372]
P20029	[K].DNHLLGTFDLTGIPPAPR.[G]	P20029 [476-493]
Q6P9R2	[K].IPISLVLR.[L]	Q6P9R2 [432-439]
P30416	[K].GEHSIVYLKPSYAFGSVGK.[E]	P30416 [214-232]
Q3UJL7	[R].ETCSLWPGQALSLQVEQLLHHR.[R]	Q3UJL7 [23-44]
Q80X50	[R].IDLAVLLGK.[T]	Q80X50 [302-310]
P07356	[K].GLGTDEDSLIEIICSR.[T]	P07356 [120-135]
P53026	[R].DTLYEAVR.[E]	P53026 [8-15]
Q01853	[K].AIANECQANFISIK.[G]	Q01853 [530-543]
Q9WVA4	[R].TLMNLGGLAVAR.[D]	Q9WVA4 [128-139]
P99026	[R].TQNPMVTGTSVLGVK.[F]	P99026 [46-60]
P08249	[K].TIIPLISQCTPK.[V]	P08249 [204-215]
F7BGR7	[R].AKFEEYGPVIECDIVK.[DE]	F7BGR7 [212-227]
P29341	[K].FSPAGPILSIR.[V]	P29341 [31-41]
P70698	[K].TVQVVPHITDAIQEWVMR.[Q]	P70698 [110-127]
P11499	[R].GFEVVYMTEPIDEYCVQQLK.[E]	P11499 [507-526]
P52480	[R].AGKPVICATQMLESMIK.[K]	P52480 [320-336]
Q9Z1N5	[R].DFLLKPELLR.[A]	Q9Z1N5 [49-58]
P62960	[R].RPQYSNPPVQGEVMEGADNQGAGEQGRPVR.[Q]	P62960 [203-232]
E9Q390	[K].DLIGDQNR.[S]	E9Q390 [90-97]
Q61990	[R].AITIAGIPQSIIECVK.[Q]	Q61990 [145-160]
P14211	[R].QIDNPDYK.[G]	P14211 [279-286]
F6XI62	[K].ASINMLR.[I]	F6XI62 [176-182]
A0T1J8	[R].NHQLYCNDCYLR.[F]	A0T1J8 [1679-1690]
Q08943	[K].LFDFVNAK.[K]	Q08943 [414-421]
Q6ZQK2	[K].LGLAPQIQDLYGK.[V]	Q6ZQK2 [186-198]
Q91ZJ5	[R].GLPDNISSVLNK.[L]	Q91ZJ5 [96-107]
Q3ULL5	[K].TGFQAVTGK.[R]	Q3ULL5 [314-322]
Q9JMK2	[K].GYPSEFSTYLNFCR.[S]	Q9JMK2 [243-256]
Q3UKX3	[R].ELLYGGTSPTAETILK.[S]	Q3UKX3 [473-488]
Q9D0K3	[K].IIEPIQSR.[C]	Q9D0K3 [172-179]
P40142	[R].VLDPFTIKPLDR.[K]	P40142 [531-542]
P47857; P12382	[R].LPLMECVQVTK.[D]	P47857 [346-356]; P12382 [346-356]
G3UXL2	[R].INNACFEAVVVTNTIPQEDK.[M]	G3UXL2 [261-280]
Q9CWK0	[K].CMQLTDFILK.[F]	Q9CWK0 [54-63]
A0T1J8	[K].SMSDVSAEDVQNLR.[Q]	A0T1J8 [652-665]
Q05D44	[K].HIAVFPCK.[M]	Q05D44 [1082-1089]
D3YVN7	[R].TVVTGIEMFHK.[S]	D3YVN7 [301-311]
Q6ZQK2	[K].ITLQDVVSHSK.[K]	Q6ZQK2 [949-959]
O70569	[R].IEDVTPIPSDSTR.[R]	O70569 [129-141]
O08582	[K].STLLGVLTHGELDNGR.[G]	O08582 [174-189]
P11983	[R].EQLAIAEFAR.[S]	P11983 [434-443]
P04627	[R].GYLSPDLSK.[VI]	P04627 [523-531]
Q3UJL7	[R].YQDILVFR.[S]	Q3UJL7 [48-55]
Q61858	[R].DAAQLAEEAGFPEVAR.[M]	Q61858 [193-208]
Q99KI0	[R].WVVIGDENYGEGSSR.[E]	Q99KI0 [657-671]
P27659	[K].AHLMEIQVNGGTVAEK.[L]	P27659 [178-193]
Q6A0F1	[K].QITSYGETCPGLEQYAIK.[K]	Q6A0F1 [429-446]
O70591	[K].GAVSAEQVIAGFNR.[L]	O70591 [19-32]
P16125	[K].DYSVTANSK.[I]	P16125 [83-91]
Q80U89	[K].LLYNNVSNFGR.[L]	Q80U89 [1226-1236]
Q64727	[K].QVATALQNLQTK.[T]	Q64727 [465-476]
Q8BTM8	[K].VEPGLGADNSVVR.[F]	Q8BTM8 [1020-1032]
P06745	[K].TFTTQETITNAETAK.[E]	P06745 [212-226]
P04184	[K].EVEVIGGADKYHSVCR.[-L]	P04184 [171-186]
Q3UBK2	[K].MSSYAFFVQTCR.[E]	Q3UBK2 [13-24]
Q542A3	[K].MVLVNAVYFK.[G]	Q542A3 [196-205]
Q61553	[K].QIWTLEQPPDEAGSAAVCLR.[S]	Q61553 [44-63]
D3Z7Q5	[K].AVENYLIQMAR.[Y]	D3Z7Q5 [148-158]
Q3TL79	[K].QTFGYGAR.[L]	Q3TL79 [329-336]
Q1HFZ0	[R].LAQEGIYTLYPFINSR.[I]	Q1HFZ0 [602-617]
Q80UT7	[K].TCTTVAFTQVNSEDKGALAK.[L]	Q80UT7 [202-221]
Q9D0R2	[R].CGPLIDLCR.[G]	Q9D0R2 [253-261]
A6ZI47	[K].GVVPLAGTNGETTTQGLDDLSGR.[C]	A6ZI47 [112-134]
E9QN31	[R].DLAQALINR.[G]	E9QN31 [308-316]
Q5M9M4	[R].MNVLADALK.[S]	Q5M9M4 [4-12]
Q7TN98	[R].FGPLIVDWPHK.[A]	Q7TN98 [495-505]
Q3THK7	[K].VINAAHSFYNGTTTLPISDEDR.[T]	Q3THK7 [296-317]
P26041	[R].KESPLLFK.[F]	P26041 [72-79]
Q3TN61	[R].IGAFGYMECSAK.[T]	Q3TN61 [151-162]
Q02257	[K].MVPLLNK.[N]	Q02257 [273-279]
Q9WTP6	[K].LAENFCVCHLATGDMLR.[A]	Q9WTP6 [35-51]
Q5I1X5	[R].GSPLAEGPQAFFPER.[G]	Q5I1X5 [186-200]
P11983	[R].AFHNEAQVNPER.[K]	P11983 [469-480]
Q9Z2X1	[R].SYSDPPLK.[F]	Q9Z2X1 [193-200]
Q02257	[R].TMQNTSDLDTAR.[C]	Q02257 [192-203]
E9QK41	[K].LNSGLGQLILK.[E]	E9QK41 [694-704]
O55234	[R].GPGLYYVDSEGNR.[I]	O55234 [167-179]
O09061	[K].AGGSASAMLQPLLDNQVGFK.[N]	O09061 [164-183]
Q7TMM9; Q9D6F9; Q9ERD7; P99024; P68372	[-].MREIVHLQAGQCGNQIGAK.[F]	Q7TMM9 [1-19]; Q9D6F9 [1-19]; Q9ERD7 [1-19]; P99024 [1-19]; P68372 [1-19]
Q6IFZ8	[R].FASFIDKVQFLEQQNK.[V]	Q6IFZ8 [163-178]
Q8VDC3	[K].GPFLLGIK.[A]	Q8VDC3 [796-803]
O55234	[R].AIYQATYR.[D]	O55234 [218-225]
H3BJQ7	[K].VNLAELFK.[G]	H3BJQ7 [75-82]
Q3U890	[R].IFSIVEQR.[L]	Q3U890 [389-396]
P50247	[R].GISEETTTGVHNLYK.[M]	P50247 [152-166]
Q6ZQ58	[R].LGIGQSQEMNTLFR.[F]	Q6ZQ58 [881-894]
Q9R0H5	[K].AEAEALYQTK.[FL]	Q9R0H5 [318-327]
P11499	[R].ADHGEPIGR.[G]	P11499 [169-177]
Q7TMM9; Q9D6F9; Q9ERD7; P99024; P68372; Q922F4	[K].NMMAACDPR.[H]	Q7TMM9 [298-306]; Q9D6F9 [298-306]; Q9ERD7 [298-306]; P99024 [298-306]; P68372 [298-306]; Q922F4 [298-306]
Q8C2Q7	[R].YVELFLNSTAGASGGAYEHR.[Y]	Q8C2Q7 [356-375]
P70698	[R].LLETCSIALVGK.[Y]	P70698 [295-306]
P08003	[KR].FDVSGYPTIK.[I]	P08003 [125-134]; [240-249]
Q3TFF0	[K].EHEVFQR.[D]	Q3TFF0 [256-262]
Q3TGU7	[R].ITSGPFEPDLYK.[S]	Q3TGU7 [333-344]
B2RTP7	[R].GEHAIKDAR.[G]	B2RTP7 [452-460]
E9Q1Z0; Q8BGZ7; P11679; Q32P04	[KR].AQYEDIANR.[S]	E9Q1Z0 [317-325]; Q8BGZ7 [326-334]; P11679 [271-279]; Q32P04 [338-346]
Q8BMK0	[K].LPLSGLTEGVGMTR.[N]	Q8BMK0 [117-130]
Q9JHW2	[R].FAELAQIYAQR.[G]	Q9JHW2 [158-168]
B9EHN0	[K].GNVQVVIPFLTESYSSSQDPPEK.[S]	B9EHN0 [605-627]
P29341	[K].EFSPFGTITSAK.[V]	P29341 [313-324]
P05214; P68373	[R].GDVVPKDVNAAIATIK.[T]	P05214 [321-336]; P68373 [321-336]
Q564E8	[K].LAPGGHVGR.[F]	Q564E8 [240-248]
P70168	[R].VAAGLQIK.[N]	P70168 [55-62]
J3QMZ1	[K].LKSSNMSNK.[L]	J3QMZ1 [20-28]
Q61990; P60335	[R].ESTGAQVQVAGDMLPNSTER.[A]	Q61990 [125-144]; P60335 [125-144]
P08030	[K].IDYIAGLDSR.[G]	P08030 [58-67]
O55201	[K].VILGEDR.[E]	O55201 [1037-1043]
Q3TEY6	[K].FGNVYLAR.[E]	Q3TEY6 [135-142]
P61290	[R].LIISELR.[N]	P61290 [219-225]
P06745	[R].FAAYFQQGDMESNGK.[Y]	P06745 [348-362]
P57746	[K].FTAGDFSTTVIQNVNK.[A]	P57746 [74-89]
Q8BU30	[R].LYLINSPVVR.[A]	Q8BU30 [625-634]
Q9DCL9	[R].VVVLMGSTSDLGHCEK.[I]	Q9DCL9 [268-283]
Q5M9M4	[R].MNVLADALK.[S]	Q5M9M4 [4-12]
Q9CXW3	[K].EKPSYDTEADPSEGLMNVLK.[K]	Q9CXW3 [178-197]
Q3UCF0	[K].QAYTQFGGK.[R]	Q3UCF0 [119-127]
Q9D6R2	[R].IAEFAFEYAR.[N]	Q9D6R2 [179-188]
P80313	[K].ALEIIPR.[Q]	P80313 [441-447]
P19096	[R].DGAWGAFR.[H]	P19096 [1501-1508]
Q61753	[R].AGTGVDNVDLEAATR.[K]	Q61753 [76-90]
Q32MW3	[K].TYGESMLYLDGQR.[H]	Q32MW3 [408-420]
P97355	[R].LYCPVEFSK.[E]	P97355 [335-343]
Q02257	[R].MEEIVEGCTGALHILAR.[D]	Q02257 [556-572]
Q8C196	[K].SVGEVMAIGR.[T]	Q8C196 [794-803]
Q61990	[K].IANPVEGSTDR.[Q]	Q61990 [320-330]
Q9R020	[R].VSDGDWICPDKK.[C]	Q9R020 [8-19]
Q3TVV6	[R].KAVVVCPK.[D]	Q3TVV6 [578-585]
P80316	[R].AVTIFIR.[G]	P80316 [382-388]
P62334	[R].VALDMTTLTIMR.[Y]	P62334 [98-109]
P62715	[R].AHQLVMEGYNWCHDR.[N]	P62715 [240-254]
P11152	[R].LSPDDADFVDVLHTFTR.[G]	P11152 [198-214]
V9GXF8; Q3UK83	[K].YHTVNGHNCEVR.[K]	V9GXF8 [31-42]; Q3UK83 [167-178]
B9EHN0	[K].DNPGVVTCLDEAR.[H]	B9EHN0 [227-239]
P70349	[K].IIFEDDR.[C]	P70349 [31-37]
P62889	[K].LVILANNCPALR.[K]	P62889 [45-56]
Q3TIV3; P11103	[R].FYTLIPHDFGMK.[K]	Q3TIV3 [736-747]; P11103 [735-746]
Q3THQ5	[R].AMADPEVQQIMSDPAMR.[L]	Q3THQ5 [489-505]
P97371	[K].TENLLGSYFPK.[K]	P97371 [25-35]
Q60692	[R].TTTGSYIANR.[V]	Q60692 [53-62]
Q3UJW9	[RK].SPAQILLR.[WF]	Q3UJW9 [244-251]
P05214	[R].AFVHWYVGEGMEEGEFSEAREDLAALEK.[D]	P05214 [403-430]
Q08189	[R].VITNFNSAHDTDR.[N]	Q08189 [293-305]
P01027	[R].VGLVAVDK.[G]	P01027 [592-599]
P26443	[K].IIAEGANGPTTPEADKIFLER.[N]	P26443 [400-420]
Q8BTM8	[K].VTAQGPGLEPSGNIANK.[T]	Q8BTM8 [384-400]
E9Q5A0	[R].LAHEVGWK.[Y]	E9Q5A0 [361-368]
Q642L7	[K].CCLTYCFNKPEDK.[-]	Q642L7 [144-156]
H3BJW3	[K].GFALVGVGSEASSK.[K]	H3BJW3 [125-138]
F7BGR7	[R].NSLYDMAR.[Y]	F7BGR7 [455-462]
Q9D6F9; P99024; P68372; Q922F4	[K].VSDTVVEPYNATLSVHQLVENTDETYCIDNEALYDICFR.[T]	Q9D6F9 [175-213]; P99024 [175-213]; P68372 [175-213]; Q922F4 [175-213]
Q3UIJ2	[K].LTPLSHEVISR.[Q]	Q3UIJ2 [28-38]
Q11011	[R].YAAVTQFEATDAR.[R]	Q11011 [174-186]
P63101	[R].YLAEVAAGDDKK.[G]	P63101 [128-139]
E9Q557	[K].IEVLEEELR.[L]	E9Q557 [1046-1054]
A6ZI44	[R].YASICQQNGIVPIVEPEILPDGDHDLKR.[C]	A6ZI44 [228-255]
Q3UA81	[R].LPLQDVYK.[I]	Q3UA81 [248-255]
P58252	[K].GPLMMYISK.[M]	P58252 [392-400]
P51150	[R].LVTMQIWDTAGQER.[F]	P51150 [56-69]
Q60692	[R].QVLLGDQIPK.[F]	Q60692 [220-229]
P58252	[R].CELLYEGPPDDEAAMGIK.[S]	P58252 [369-386]
Q7TNC4	[R].NSMPASSFQQQK.[L]	Q7TNC4 [175-186]
B7ZNK9	[R].IIYVPLPDAATR.[R]	B7ZNK9 [791-802]
Q02257	[K].AAMIVNQLSK.[K]	Q02257 [162-171]
Q61176	[R].EGLYITEEIYK.[T]	Q61176 [256-266]
Q8C112	[R].SAASYMLFDPK.[D]	Q8C112 [335-345]
Q5EG47	[R].VPFLVAETPR.[A]	Q5EG47 [375-384]
Q9WV02	[K].SLDGKAIKVEQATKPSFESGR.[R]	Q9WV02 [73-93]
A0A0A6YVV8	[R].VIACFDSLK.[G]	A0A0A6YVV8 [50-58]
O70194	[R].SVYSWDIVVQR.[V]	O70194 [261-271]
P63038	[K].LVQDVANNTNEEAGDGTTTATVLAR.[S]	P63038 [97-121]
Q8BTM8	[R].LSPFMADIR.[E]	Q8BTM8 [656-664]
Q921L4	[K].AMGIMNSFVNDIFER.[I]	Q921L4 [59-73]
Q6NXX2	[R].FNTFIHEDIWNIR.[G]	Q6NXX2 [71-83]
Q3TL71	[R].GGDLMAYDR.[R]	Q3TL71 [317-325]
B9EHN0	[K].LKSDTAAAAVR.[Q]	B9EHN0 [527-537]
E9Q557	[R].GYFNEELSEILSDPSDDTK.[G]	E9Q557 [2407-2425]
P34022	[K].ICANHYITPMMELKPNAGSDR.[A]	P34022 [98-118]
Q8C2Q3	[R].LAELSDYR.[R]	Q8C2Q3 [608-615]
P70168	[K].LAATNALLNSLEFTK.[A]	P70168 [192-206]
P09103	[K].THILLFLPK.[S]	P09103 [257-265]
Q80U89	[R].NLQNLLILTAIK.[A]	Q80U89 [1033-1044]
P38647	[R].VINEPTAAALAYGLDK.[S]	P38647 [219-234]
P50247	[R].IILLAEGR.[L]	P50247 [336-343]
Q8VDD5	[K].LDPHLVLDQLR.[C]	Q8VDD5 [683-693]
Q9CQV8	[K].QTTVSNSQQAYQEAFEISK.[K-]	Q9CQV8 [141-159]
Q62266	[K].VPEPCQPK.[VA]	Q62266 [76-83]; [84-91]; [100-107]
Q80UT7	[K].VPPAINQFTQALDR.[Q]	Q80UT7 [80-93]
P63038	[K].VGEVIVTK.[D]	P63038 [345-352]
Q9Z1N5	[R].ILVATNLFGR.[G]	Q9Z1N5 [340-349]
Q3UDJ7; Q7TPR4	[K].GYEEWLLNEIR.[R]	Q3UDJ7 [397-407]; Q7TPR4 [377-387]
Q8BLY1	[R].YVMPSCESDAR.[A]	Q8BLY1 [297-307]
B7ZNK9	[K].ALANESGLNFLAIK.[G]	B7ZNK9 [680-693]
Q02257	[R].HVAAGTQQPYTDGVR.[M]	Q02257 [541-555]
F7BGR7	[R].TAPGMGDQSGCYR.[C]	F7BGR7 [268-280]
Q3UGA8	[K].CGLPYVEVLCK.[N]	Q3UGA8 [339-349]
Q5BLK1	[R].MATEVAADALGEEWK.[G]	Q5BLK1 [32-46]
B7U582; P63017	[K].LLQDFFNGKELNK.[S]	B7U582 [352-364]; P63017 [349-361]
Q6A0D0	[R].FHDFLGDSWGILFSHPR.[D]	Q6A0D0 [28-44]
Q3UDJ7	[K].LSGSNPYTTVTPQIINSK.[W]	Q3UDJ7 [606-623]
Q3TGR2	[K].EDGGGWWYNR.[C]	Q3TGR2 [417-426]
Q5BLK2	[R].LIDLHSPSEIVK.[Q]	Q5BLK2 [88-99]
Q04447	[R].GTGGVDTAAVGGVFDVSNADR.[L]	Q04447 [321-341]
Q3UK83	[R].GFAFVTFDDHDSVDK.[I]	Q3UK83 [147-161]
P68040	[K].DVLSVAFSSDNR.[Q]	P68040 [107-118]
A6ZI47; A6ZI44	[K].SKGGVVGIK.[V]	A6ZI47 [100-108]; A6ZI44 [154-162]
P52480	[R].AGKPVICATQMLESMIK.[K]	P52480 [320-336]
Q8BTM8	[R].IANLQTDLSDGLR.[L]	Q8BTM8 [64-76]
P18760	[K].KAVLFCLSEDKK.[N]	P18760 [34-45]
Q61753	[K].VTADVINAAEK.[L]	Q61753 [59-69]
Q80U95	[K].QEVQGDGPFLDGINVTIR.[R]	Q80U95 [711-728]
Q7TMK9	[K].VTEGLTDVILYHQPDDK.[K]	Q7TMK9 [266-282]
Q80V08	[K].QWGWTQGR.[W]	Q80V08 [85-92]
P99026	[K].QPVLSQTEAR.[E]	P99026 [202-211]
Q9QY23	[R].LSSGFDDIDLPSAVK.[Y]	Q9QY23 [312-326]
P16125	[K].IVADKDYSVTANSK.[I]	P16125 [78-91]
P42128	[R].EFEFLMR.[Q]	P42128 [99-105]
Q3UGA8	[K].FGVLSDNFK.[G]	Q3UGA8 [373-381]
Q9CW46	[K].GYGFAEYMK.[K]	Q9CW46 [174-182]
Q9QXT0	[R].INPDGSQSVVEVPYAR.[S]	Q9QXT0 [58-73]
F7DEU6	[K].IAQGVSGSIQDK.[G]	F7DEU6 [463-474]
P09411	[K].ITLPVDFVTADK.[F]	P09411 [280-291]
B2CY77	[K].FAAATGATPIAGR.[F]	B2CY77 [90-102]
Q8BVQ9	[R].SVCTEAGMFAIR.[A]	Q8BVQ9 [429-440]
Q3THG2	[K].LYDNLLEQNLIR.[V]	Q3THG2 [326-337]
P07742	[R].LNSAIIYDR.[D]	P07742 [131-139]
P52480	[K].GSGTAEVELK.[K]	P52480 [126-135]
Q8BMK0	[K].LPLSGLTEGVGMTR.[N]	Q8BMK0 [117-130]
Q58EV4	[R].VFQVEYAMK.[A]	Q58EV4 [21-29]
Q3T9Y8	[K].LFDSTTLEHQK.[T]	Q3T9Y8 [214-224]
F7BGR7	[R].GLDNTEFQGK.[R]	F7BGR7 [246-255]
Q78DX7	[K].IGDFGLAR.[IDFE]	Q78DX7 [2093-2100]
Q3UGA8	[K].CELENCQPFVVETLHGK.[I]	Q3UGA8 [100-116]
Q9Z2X1	[K].HSGPNSADSANDGFVR.[L]	Q9Z2X1 [99-114]
P30416	[K].DKFSFDLGK.[G]	P30416 [75-83]
P63242	[K].KYEDICPSTHNMDVPNIK.[R]	P63242 [68-85]
P23950	[K].AVGTPAGGGFPR.[R]	P23950 [40-51]
Q3TLP8	[K].TVFDEAIR.[A]	Q3TLP8 [186-193]
Q01853	[R].KYEMFAQTLQQSR.[G]	Q01853 [754-766]
Q3UCF0	[K].VEIATLTR.[E]	Q3UCF0 [211-218]
O08749	[R].VCHAHPTLSEAFR.[E]	O08749 [483-495]
P58252	[K].YRCELLYEGPPDDEAAMGIK.[S]	P58252 [367-386]
P11499	[K].HSQFIGYPITLYLEK.[E]	P11499 [205-219]
O08583	[R].SLGTADVHFER.[RK]	O08583 [144-154]
Q9QUM9	[K].CDPAGYYCGFK.[A]	Q9QUM9 [154-164]
P56873	[R].LMGDYLLR.[G]	P56873 [37-44]
Q9D0E1	[R].LGSTVFVANLDYK.[V]	Q9D0E1 [201-213]
P53996	[K].TSEVNCYR.[C]	P53996 [154-161]
A2A7S7	[K].YLPALGYSK.[R]	A2A7S7 [234-242]
Q9JI11	[K].LADFGVAGQLTDTMAK.[R]	Q9JI11 [165-180]
A0A097PUG4	[R].TVAAPSVFIFPPSDEQLK.[S]	A0A097PUG4 [133-150]
B2RQH0	[R].EVTPFFIIYCR.[A]	B2RQH0 [118-128]
Q8BTM8	[K].AGVAPLQVK.[V]	Q8BTM8 [1478-1486]
Q4FZE6	[K].HVVFIAQR.[R]	Q4FZE6 [91-98]
P97350	[R].LLTSHTGNTSNSEDILSSACYTVR.[N]	P97350 [623-646]
Q3UA81	[K].THINIVVIGHVDSGK.[S]	Q3UA81 [6-20]
Q3U4U6	[K].GISDLAQHYLMR.[A]	Q3U4U6 [295-306]
A1A4T2	[R].KLVAIVDPHIK.[V]	A1A4T2 [484-494]
P97350	[R].FSSYSQMENWSR.[H]	P97350 [118-129]
Q3TZ32	[R].AVFDETYPDPVR.[V]	Q3TZ32 [684-695]
Q3THE2	[K].GNFNYIEFTR.[I]	Q3THE2 [152-161]
P62960	[R].NDTKEDVFVHQTAIK.[KR]	P62960 [76-90]
Q5F2B4	[R].ALYSLALR.[C]	Q5F2B4 [352-359]
P70168	[R].VLANPGNSQVAR.[V]	P70168 [43-54]
Q3UAD6	[K].DISTNYYASQK.[K]	Q3UAD6 [672-682]
B2RQC6	[R].LLDTIGISQPQWR.[E]	B2RQC6 [1054-1066]
Q9QYJ3	[R].NPFDTFFGQR.[N]	Q9QYJ3 [110-119]
Q8BTM8	[R].GAGTGGLGLAVEGPSEAK.[M]	Q8BTM8 [1382-1399]
Q5M9P3	[R].IAGQVAAANK.[K]	Q5M9P3 [140-149]
Q64727	[K].LLAVAATAPPDAPNREEVFDER.[A]	Q64727 [608-629]
Q99KQ4	[K].LLPPYLR.[V]	Q99KQ4 [343-349]
Q9QY23	[R].ADYDTLSLR.[S]	Q9QY23 [174-182]
Q3UIF3	[K].HSQFIGYPITLFVEK.[E]	Q3UIF3 [210-224]
Q5BLK2	[K].TPVEPEVAIHR.[I]	Q5BLK2 [9-19]
Q8BTM8	[K].VNQPASFAVSLNGAK.[G]	Q8BTM8 [2347-2361]
P08249	[K].VDFPQDQLATLTGR.[I]	P08249 [216-229]
P47857	[K].GQIEEAGWSYVGGWTGQGGSK.[L]	P47857 [446-466]
A2A5Y6	[R].HLSNVSSTGSIDMVDSPQLATLADEVSASLAK.[Q]	A2A5Y6 [715-746]
Q60605	[K].EAFQLFDR.[T]	Q60605 [14-21]
Q9ERV1	[R].LQVLHPFDPEQR.[K]	Q9ERV1 [198-209]
Q3UDJ7; Q7TPR4	[K].ALDFIASK.[G]	Q3UDJ7 [116-123]; Q7TPR4 [96-103]
Q3TG52	[R].VTIEYYSQLK.[T]	Q3TG52 [496-505]
P62996	[K].YGPIADVSIVYDQQSR.[R]	P62996 [141-156]
O55234	[K].LLANMVYQYK.[G]	O55234 [141-150]
A0A097PUG4	[K].DSTYSLSSTLTLSK.[A]	A0A097PUG4 [194-207]
P63242	[K].IVEMSTSK.[T]	P63242 [40-47]
P11983	[K].IACLDFSLQK.[T]	P11983 [234-243]
P04627	[R].GLNQDCCVVYR.[L]	P04627 [53-63]
Q3TJF2	[K].IGIVGLPNVGK.[S]	Q3TJF2 [25-35]
Q00612	[R].VGFQYEGTYK.[W]	Q00612 [499-508]
E9PZF0	[R].NIIHGSDSVESAEK.[E]	E9PZF0 [230-243]
P09103	[K].VDATEESDLAQQYGVR.[G]	P09103 [84-99]
Q8BTM8	[K].TGVAVNKPAEFTVDAK.[H]	Q8BTM8 [685-700]
Q61753	[R].ALQSGQCAGAALDVFTEEPPRDR.[A]	Q61753 [248-270]
Q9D6F9	[K].MAATFIGNSTAIQELFKR.[I]	Q9D6F9 [363-380]
Q9D0I9	[K].VEIAGPGFINVHLR.[K]	Q9D0I9 [154-167]
P27773	[K].QAGPASVPLR.[T]	P27773 [131-140]
Q80UT7	[K].VAPAPAVVK.[K]	Q80UT7 [16-24]
P35979	[R].QAQIEVVPSASALIIK.[A]	P35979 [68-83]
P23492	[R].VFGFSLITNK.[V]	P23492 [235-244]
Q9QYJ3	[R].EALCGCTVNVPTLDGR.[T]	Q9QYJ3 [264-279]
Q9D0I9	[K].VIVDFSSPNIAK.[E]	Q9D0I9 [194-205]
Q7TMM9	[R].KESESCDCLQGFQLTHSLGGGTGSGMGTLLISK.[I]	Q7TMM9 [122-154]
Q20BD0	[K].IFVGGLNPEATEEK.[I]	Q20BD0 [161-174]
Q3U4U6	[K].TAVETAVLLLR.[I]	Q3U4U6 [508-518]
P56480	[K].TVLIMELINNVAK.[A]	P56480 [213-225]
Q8BTM8	[R].TGVELGKPTHFTVNAK.[T]	Q8BTM8 [885-900]
P47757	[R].STLNEIYFGK.[T]	P47757 [226-235]
P58252	[K].DSVVAGFQWATK.[E]	P58252 [677-688]
P68373; A0A0A0MQA5	[R].AFVHWYVGEGMEEGEFSEAREDMAALEK.[D]	P68373 [403-430]; A0A0A0MQA5 [432-459]
Q99K87	[RK].ISATSIFFESMPYK.[LV]	Q99K87 [183-196]
Q64727	[R].VLQLTSWDEDAWASK.[D]	Q64727 [247-261]
E9Q557	[K].AITGFDDPFSGK.[T]	E9Q557 [2104-2115]
Q5FW97	[R].AAVPSGASTGIYEALELRDNDK.[T]	Q5FW97 [33-54]
P62911	[K].SYCAEIAHNVSSK.[N]	P62911 [94-106]
Q5SS40	[K].EAAENSLVAYK.[A]	Q5SS40 [143-153]
Q7TMM9; P99024; P68372	[R].MSMKEVDEQMLNVQNK.[N]	Q7TMM9 [321-336]; P99024 [321-336]; P68372 [321-336]
Q9DB79	[R].VLLGETGK.[E]	Q9DB79 [23-30]
P05202	[R].FVTVQTISGTGALR.[V]	P05202 [126-139]
Q9QYJ3	[RK].VSLEEIYSGCTK.[KR]	Q9QYJ3 [170-181]
Q5M9N9	[K].LGCEVLGVSVDSQFTHLAWINTPR.[K]	Q5M9N9 [68-91]
Q921L4	[K].QVHPDTGISSK.[A]	Q921L4 [48-58]
Q564E8	[R].GPCIIYNEDNGIIK.[AG]	Q564E8 [206-219]
Q3UZH3	[R].GDLNDCFIPCTPK.[G]	Q3UZH3 [140-152]
P62196	[K].GVCTEAGMYALR.[E]	P62196 [361-372]
Q61753	[R].ALVDHENVISCPHLGASTK.[E]	Q61753 [271-289]
P40124	[R].SALFAQINQGESITHALK.[H]	P40124 [254-271]
Q8C196	[K].VLGTSVESIMATEDR.[Q]	Q8C196 [533-547]
Q571M2	[R].NFTTEQVTAMLLSK.[L]	Q571M2 [199-212]
P61161	[R].GYAFNHSADFETVR.[M]	P61161 [201-214]
P63038	[K].VGEVIVTKDDAMLLK.[G]	P63038 [345-359]
P50446; P04104; Q8BGZ7; Q8VED5; P11679; Q32P04; B2RTP7	[KR].YEDEINK.[R]	P50446 [242-248]; P04104 [278-284]; Q8BGZ7 [240-246]; Q8VED5 [230-236]; P11679 [185-191]; Q32P04 [252-258]; B2RTP7 [289-295]
Q03265	[R].EAYPGDVFYLHSR.[L]	Q03265 [335-347]
Q149Z9	[R].SGVSLAALKK.[AS]	Q149Z9 [56-65]
Q03265	[R].VVDALGNAIDGK.[G]	Q03265 [150-161]
P63017	[R].RFDDAVVQSDMK.[H]	P63017 [77-88]
Q5BLJ9	[K].VYNYNHLMPTR.[Y]	Q5BLJ9 [74-84]
P62830	[R].LPAAGVGDMVMATVK.[K]	P62830 [52-66]
Q80X50	[K].GGSTTGSQFLEQFK.[T]	Q80X50 [374-387]
Q3UK83	[K].LFIGGLSFETTDESLR.[S]	Q3UK83 [16-31]
Q9EPU0	[K].ADSVVVLLCR.[Q]	Q9EPU0 [196-205]
P05214; P68373	[K].RTIQFVDWCPTGFK.[V]	P05214 [339-352]; P68373 [339-352]
Q543F6	[K].IGEGTYGTVFK.[A]	Q543F6 [10-20]
Q922F4	[R].KECEHCDCLQGFQLTHSLGGGTGSGMGTLLISK.[I]	Q922F4 [122-154]
J3QNG0	[R].GIYETPAGTILYHAHLDIEAFTMDR.[E]	J3QNG0 [280-304]
P61963	[K].GVYPDLLATSGDYLR.[V]	P61963 [82-96]
Q497E9	[K].LTPEEEEILNK.[K]	Q497E9 [129-139]
A6ZI47; A6ZI44	[R].LQSIGTENTEENR.[R]	A6ZI47 [44-56]; A6ZI44 [98-110]
Q3TQX5	[R].ELAVQIYEEAR.[K]	Q3TQX5 [277-287]
P20029; B7U582; P63017; B2CSK2	[R].IINEPTAAAIAYGLDK.[RGK]	P20029 [199-214]; B7U582 [173-188]; P63017 [172-187]; B2CSK2 [174-189]
Q3TIV3; P11103	[R].MAIMVQSPMFDGK.[V]	Q3TIV3 [35-47]; P11103 [35-47]
P20029	[K].DAGTIAGLNVMR.[I]	P20029 [187-198]
Q922F4	[K].EVDEQMLAIQNK.[N]	Q922F4 [325-336]
Q4U4S6	[K].NIQNIEITRDFQK.[Q]	Q4U4S6 [1919-1931]
Q8K136	[R].EGDDWSQLNVLK.[K]	Q8K136 [6-17]
Q6A0F1	[K].HFSGLEEAVYR.[N]	Q6A0F1 [28-38]
Q6ZQK2	[K].IFYPETTDIYDR.[K]	Q6ZQK2 [155-166]
Q61782	[R].RLLEGEDAHLSSSQFSSGSQSSR.[D]	Q61782 [39-61]
Q3THQ5	[K].TVDLKPDWGK.[G]	Q3THQ5 [64-73]
P11679	[R].LEGLTDEINFLR.[Q]	P11679 [220-231]
D3YZT1	[R].NIDMTKALLK.[L]	D3YZT1 [71-80]
P63017	[K].MKEIAEAYLGK.[TA]	P63017 [127-137]
P63017	[K].GPAVGIDLGTTYSCVGVFQHGK.[V]	P63017 [4-25]
Q571M2; Q61699	[RK].NHAAPFSK.[V]	Q571M2 [511-518]; Q61699 [423-430]
P24547	[R].GMGSLDAMDK.[H]	P24547 [413-422]
E9PUX4	[R].HQEGEIFDTEKEKYEITEQR.[K]	E9PUX4 [235-254]
E9QK41	[R].TLSPTPSAEGYQDVR.[D]	E9QK41 [473-487]
P07356	[K].GVDEVTIVNILTNR.[S]	P07356 [50-63]
Q61753	[K].ILQDGGLQVVEK.[Q]	Q61753 [22-33]
Q60605	[K].ILYSQCGDVMR.[A]	Q60605 [27-37]
E9Q5A0	[K].YQAVTATLEEK.[R]	E9Q5A0 [369-379]
P14115	[R].INFDKYHPGYFGK.[V]	P14115 [43-55]
P47962	[K].GAVDGGLSIPHSTK.[R]	P47962 [165-178]
Q542I9	[K].AICTEAGLMALR.[E]	Q542I9 [397-408]
Q61699	[R].FVVQNVSAQK.[D]	Q61699 [462-471]
E9Q5A0	[R].MVVPAALK.[V]	E9Q5A0 [338-345]
O55234	[R].ATAGAYIASQTVK.[K]	O55234 [79-91]
Q9R0P5	[R].YALYDASFETK.[E]	Q9R0P5 [82-92]
Q3UW40	[K].CESAFLSK.[R]	Q3UW40 [36-43]
B1AY10	[R].CPACQNVSAHVPNTYTCFCGK.[V]	B1AY10 [399-419]
O35125	[R].ALVLLDNPCADETDYR.[Q]	O35125 [271-286]
Q3THQ5	[R].KAAALEAMKDYTK.[A]	Q3THQ5 [434-446]
Q61753	[R].GGIVDEGALLR.[A]	Q61753 [237-247]
Q5F2B4	[R].NLLLASPR.[M]	Q5F2B4 [250-257]
P62960	[R].NGYGFINR.[N]	P62960 [68-75]
Q3UXQ6	[K].DANGNSFATR.[L]	Q3UXQ6 [212-221]
E9Q557	[R].ALLQAILQTEDMLK.[V]	E9Q557 [784-797]
P68040	[K].LWNTLGVCK.[Y]	P68040 [131-139]
Q02257	[K].AAMIVNQLSK.[K]	Q02257 [162-171]
Q543N3	[K].GFSVVADTPELQR.[I]	Q543N3 [97-109]
Q497I4	[R].LVVQIDNAK.[L]	Q497I4 [168-176]
P97350	[R].VMGNQVFPEVTR.[L]	P97350 [611-622]
D3YWJ3	[K].IGKPHTVPCK.[V]	D3YWJ3 [174-183]
Q32P04	[R].EYQELMNTK.[L]	Q32P04 [446-454]
P11152	[R].AQQHYPVSAGYTK.[L]	P11152 [117-129]
Q3TG52	[R].ANDTTFGLAAGVFTR.[D]	Q3TG52 [436-450]
P23949	[R].SQHLLHLQQQQK.[G]	P23949 [133-144]
O09167	[K].HGVVPLATYMR.[I]	O09167 [22-32]
Q7TMK9	[R].AIEALKEFNEDGALAVLQQFK.[D]	Q7TMK9 [61-81]
P99024	[K].MAVTFIGNSTAIQELFKR.[I]	P99024 [363-380]
Q8C196	[K].IMGTSPLQIDR.[A]	Q8C196 [1075-1085]
Q66JR7	[K].IALYETPTGWK.[F]	Q66JR7 [378-388]
Q80X90	[K].SPFTVGVAAPLDLSK.[I]	Q80X90 [932-946]
Q8BWL5	[K].GYGFVDFDSPAAAQK.[A]	Q8BWL5 [98-112]
Q80U89	[K].IYIDSNNNPER.[F]	Q80U89 [892-902]
Q01853	[R].LDQLIYIPLPDEK.[S]	Q01853 [639-651]
P14211	[K].VHVIFNYK.[G]	P14211 [144-151]
P23475	[R].SDSFENPVLQQHFR.[N]	P23475 [473-486]
Q4FJX4	[K].GYGYGQGAGTLSTDKGESLGIK.[H]	Q4FJX4 [70-91]
E9Q1Z0; P50446; Q8BGZ7; P07744; Q32P04; B2RTP7	[R].KLLEGEECR.[LMI]	E9Q1Z0 [445-453]; P50446 [456-464]; Q8BGZ7 [454-462]; P07744 [450-458]; Q32P04 [466-474]; B2RTP7 [503-511]
P97351	[K].NCLTNFHGMDLTR.[D]	P97351 [95-107]
P11499	[R].DNSTMGYMMAK.[K]	P11499 [613-623]
P20029	[R].TWNDPSVQQDIK.[F]	P20029 [103-114]
Q3TC45	[R].FAGDKDHLTKEDLR.[V]	Q3TC45 [19-32]
Q9D1R9	[K].SACGVCPGR.[L]	Q9D1R9 [44-52]
Q3TL71	[R].TDYNASVSVPDSSGPER.[IY]	Q3TL71 [70-86]
P20029	[R].NELESYAYSLK.[N]	P20029 [564-574]
P70124	[K].DVPFGFQTVTSDVNK.[L]	P70124 [65-79]
P53026	[K].KYDAFLASESLIK.[Q]	P53026 [106-118]
B7U582; P63017; B2CSK2; P17879	[K].ITITNDKGR.[L]	B7U582 [504-512]; P63017 [501-509]; B2CSK2 [503-511]; P17879 [501-509]
P63242	[K].KYEDICPSTHNMDVPNIKR.[N]	P63242 [68-86]
Q9CQ65	[K].YVDTPFGKPSDALILGK.[I]	Q9CQ65 [33-49]
P62717	[R].IFAPNHVVAK.[S]	P62717 [32-41]
P97351	[K].APAMFNIR.[N]	P97351 [35-42]
Q3TZ32	[K].ASEWVQQVSGLMDGK.[G]	Q3TZ32 [916-930]
P63038	[K].CEFQDAYVLLSEK.[K]	P63038 [237-249]
Q9ERD7; Q922F4	[K].VAVCDIPPR.[G]	Q9ERD7 [351-359]; Q922F4 [351-359]
P63017	[K].DNNLLGKFELTGIPPAPR.[G]	P63017 [452-469]
P62715	[R].GAGYTFGQDISETFNHANGLTLVSR.[A]	P62715 [215-239]
Q3THQ5	[K].LMDVGLIAIR.[-]	Q3THQ5 [534-543]
Q9DBF1	[R].VNLLSFTGSTQVGK.[E]	Q9DBF1 [267-280]
P63017	[K].LDKSQIHDIVLVGGSTR.[I]	P63017 [326-342]
Q3TL33	[R].EQFVEFR.[D-]	Q3TL33 [235-241]
P38647	[K].VQQTVQDLFGR.[A]	P38647 [395-405]
P60766	[K].YVECSALTQK.[G]	P60766 [154-163]
Q60605	[K].ILYSQCGDVMR.[A]	Q60605 [27-37]
P04627	[K].IGDFGLATVK.[ST]	P04627 [443-452]
Q61699	[R].RGPFELEAFYSDPQGVPYPEAK.[I]	Q61699 [437-458]
P09411	[K].QIVWNGPVGVFEWEAFAR.[G]	P09411 [333-350]
P60710	[K].LCYVALDFEQEMATAASSSSLEK.[SG]	P60710 [216-238]
Q8C196	[K].AADTIGYPVMIR.[S]	Q8C196 [576-587]
Q8BJX0	[R].YYTPTISR.[E]	Q8BJX0 [146-153]
P05214; P68373; A0A0A0MQA5	[K].FDLMYAK.[RK]	P05214 [395-401]; P68373 [395-401]; A0A0A0MQA5 [424-430]
Q9DBJ1	[R].HGESAWNLENR.[F]	Q9DBJ1 [11-21]
Q5F2B4	[R].GELLGSGCFGVVHR.[G]	Q5F2B4 [119-132]
P63017	[K].SFYPEEVSSMVLTK.[M]	P63017 [113-126]
Q6PAC3	[R].FCGTSFFTVGDDK.[T]	Q6PAC3 [119-131]
Q9CXW3	[R].SFDLLVK.[N]	Q9CXW3 [113-119]
P38647	[R].QAVTNPNNTFYATK.[R]	P38647 [108-121]
Q545B6	[R].ASGQAFELILSPR.[S]	Q545B6 [15-27]
B2RTM0	[K].RISGLIYEETR.[G]	B2RTM0 [46-56]
P26041; Q3TCP5	[K].QLFDQVVK.[T]	P26041 [28-35]; Q3TCP5 [28-35]
O88569	[R].GFGFVTFDDHDPVDK.[I]	O88569 [154-168]
Q3TIX6	[R].LLGQIVDR.[C]	Q3TIX6 [140-147]
Q9JLF6	[R].IYYGTEAQIGER.[T]	Q9JLF6 [274-285]
Q32MW3	[K].TYGESMLYLDGQR.[H]	Q32MW3 [408-420]
P62889	[K].TGVHHYSGNNIELGTACGK.[Y]	P62889 [69-87]
Q6ZQ58	[R].YGLECLFR.[YF]	Q6ZQ58 [926-933]
A0A0A0MQF6	[K].RVIISAPSADAPMFVMGVNHEK.[Y]	A0A0A0MQF6 [142-163]
Q60598	[R].YGLFPANYVELR.[Q]	Q60598 [534-545]
O70251	[R].SIQADGLVWGSSK.[L]	O70251 [164-176]
Q3THQ5	[K].LMDVGLIAIR.[-]	Q3THQ5 [534-543]
P63038	[K].NAGVEGSLIVEK.[I]	P63038 [482-493]
O08807	[R].LVQAFQYTDK.[H]	O08807 [234-243]
Q3TN61	[R].IGAFGYMECSAK.[T]	Q3TN61 [151-162]
Q3TJG6	[K].HLNEIDLFHCIDPNDSK.[H]	Q3TJG6 [49-65]
Q8R1G2	[R].NLIEWLNK.[Y]	Q8R1G2 [236-243]
O08582	[K].LVLVSPTSEQYDSLLR.[Q]	O08582 [65-80]
Q99K87	[R].AALEALGSCLNNK.[Y]	Q99K87 [83-95]
Q3UAG2	[K].VGTGEPCCDWVGDEGAGHFVK.[M]	Q3UAG2 [164-184]
Q3TVV6	[K].DLPEHAVLK.[M]	Q3TVV6 [603-611]
P27773	[K].LNFAVASR.[K]	P27773 [297-304]
P60843	[K].LQMEAPHIIVGTPGR.[V]	P60843 [147-161]
Q542A3	[K].MVLVNAVYFK.[G]	Q542A3 [196-205]
P40142	[R].SGKPAELLK.[M]	P40142 [595-603]
Q3UR00	[K].DQYANYVVQK.[M]	Q3UR00 [1121-1130]
Q8BGZ7	[R].NMQEVVEDFK.[V]	Q8BGZ7 [228-237]
P63323	[K].LGEWVGLCK.[I]	P63323 [85-93]
E9Q557	[K].FGDSNTVMR.[F]	E9Q557 [929-937]
P09405	[K].GFGFVDFNSEEDAK.[A]	P09405 [608-621]
P47963	[K].STESLQANVQR.[L]	P47963 [106-116]
Q3TL71	[K].DLAGSIIGK.[G]	Q3TL71 [397-405]
P62889	[R].VCTLAIIDPGDSDIIR.[S]	P62889 [91-106]
Q9QWL7	[K].ATMQNLNDR.[L]	Q9QWL7 [86-94]
E9Q5G3	[K].NGLLFTYGVTGSGK.[T]	E9Q5G3 [105-118]
Q3UIF3	[R].ELISNSSDALDK.[I]	Q3UIF3 [47-58]
Q8BTM8	[K].YGGPYHIGGSPFK.[A]	Q8BTM8 [2501-2513]
Q64433	[K].VVLDDKDYFLFR.[D]	Q64433 [81-92]
P62717	[R].AHSIQIMK.[V]	P62717 [121-128]
Q9D1R9	[R].AYGGSMCAK.[C]	Q9D1R9 [77-85]
Q3THH1	[R].TGEAIVDAALSALR.[Q]	Q3THH1 [124-137]
A2AFQ2	[R].LVAGEMGQNEPDQGGQR.[G]	A2AFQ2 [141-157]
Q3TI05	[K].VLAQNSGFDLQETLVK.[V]	Q3TI05 [450-465]
P20029	[K].NQLTSNPENTVFDAK.[R]	P20029 [83-97]
Q9JI11	[K].LGEGSYGSVYK.[A]	Q9JI11 [36-46]
F6XI62	[R].QIFNGTFVK.[L]	F6XI62 [164-172]
O88291	[R].NQGGSSWEAPYSR.[S]	O88291 [126-138]
Q05186	[R].HLVYESDK.[N]	Q05186 [281-288]
P47757	[R].SPWSNKYDPPLEDGAMPSAR.[L]	P47757 [73-92]
Q3TJA2	[K].AIWNVINWENVTER.[Y]	Q3TJA2 [203-216]
P27659	[K].VACIGAWHPAR.[V]	P27659 [251-261]
Q3TVV6	[K].YNILGTNTIMDK.[M]	Q3TVV6 [501-512]
P58252	[K].YRCELLYEGPPDDEAAMGIK.[S]	P58252 [367-386]
Q03141; Q571J8; Q8CIP4	[K].LDTFCGSPPYAAPELFQGK.[K]	Q03141 [209-227]; Q571J8 [210-228]; Q8CIP4 [212-230]
P60710; P68134	[R].AVFPSIVGRPR.[H-]	P60710 [29-39]; P68134 [31-41]
Q9DB79	[KR].EAIEGTYIDK.[K]	Q9DB79 [49-58]
P07356	[K].TPAQYDASELK.[A]	P07356 [105-115]
Q58EV4	[R].VFQVEYAMK.[A]	Q58EV4 [21-29]
Q3UZH3	[K].THLSLSHNPEQK.[G]	Q3UZH3 [869-880]
Q9DCL9	[K].ACGNFGIPCELR.[V]	Q9DCL9 [287-298]
P52480	[K].GSGTAEVELKK.[G]	P52480 [126-136]
Q3UER8	[R].DNCCILDER.[F]	Q3UER8 [31-39]
F6XI62	[K].SVNELIYK.[R]	F6XI62 [197-204]
P14152	[K].ENFSCLTR.[L]	P14152 [150-157]
Q3US43	[K].DITSDTSGDFR.[K]	Q3US43 [167-177]
P50446; Q6IFZ8	[R].NTKQEIAEINR.[MI]	P50446 [365-375]; Q6IFZ8 [365-375]
P56480	[R].TIAMDGTEGLVR.[G]	P56480 [110-121]
Q5M9M5	[R].LAPDYDALDVANK.[I]	Q5M9M5 [140-152]
Q5BLK1	[K].LNISFPATGCQK.[L]	Q5BLK1 [3-14]
Q9R0Y5	[K].IIFVVGGPGSGK.[G]	Q9R0Y5 [10-21]
Q91VW3	[R].IQYQLVDISQDNALRDEMR.[T]	Q91VW3 [33-51]
Q3U9P0	[R].IAIYELLFK.[E]	Q3U9P0 [9-17]
Q5M9P1	[R].LECVEPNCR.[S]	Q5M9P1 [70-78]
Q9DB79	[R].DVQIGDIVTVGECRPLSK.[T]	Q9DB79 [119-136]
Q61990	[R].IITLAGPTNAIFK.[A]	Q61990 [58-70]
Q5M9L1	[R].EELSNVLAAMR.[K]	Q5M9L1 [88-98]
Q9QWL7	[K].ATMQNLNDR.[L]	Q9QWL7 [86-94]
Q8C2Q7; Q9Z2X1	[R].VHIEIGPDGR.[V]	Q8C2Q7 [317-326]; Q9Z2X1 [317-326]
F6X9I3	[R].GWEEGVAQMSVGQR.[A]	F6X9I3 [112-125]
Q02257	[R].ALMGSPQLVAAVVR.[T]	Q02257 [178-191]
Q5CZY9	[K].LLEPVLLLGK.[E]	Q5CZY9 [77-86]
Q8BTM8	[R].ANLPQSFQVDTSK.[A]	Q8BTM8 [1465-1477]
Q5SUR0	[K].FGEPVLAGFAR.[S]	Q5SUR0 [396-406]
Q9ERD7	[K].LATPTYGDLNHLVSATMSGVTTSLR.[F]	Q9ERD7 [217-241]
P58252	[R].YLAEKYEWDVAEAR.[K]	P58252 [634-647]
P80313	[K].QQLLIGAYAK.[A]	P80313 [431-440]
Q9QY23	[R].ILNPLLDR.[V]	Q9QY23 [656-663]
Q9QUM9	[K].AINQGGLTSVAVR.[G]	Q9QUM9 [31-43]
G3UXL2	[K].LFSGSSHQDLSQK.[I]	G3UXL2 [6-18]
Q3UJV2	[R].LLLNNDNLLR.[E]	Q3UJV2 [38-47]
Q6A0F1	[K].IAVYSCPFDGMITETK.[G]	Q6A0F1 [246-261]
Q5I0T8	[K].KVWLDPNETNEIANANSR.[Q]	Q5I0T8 [21-38]
E9PYL9	[K].YDGIILPGK.[-]	E9PYL9 [170-178]
P56480	[R].IPSAVGYQPTLATDMGTMQER.[I]	P56480 [325-345]
P60710	[R].VAPEEHPVLLTEAPLNPKANR.[E]	P60710 [96-116]
P62830	[K].NLYIISVK.[G]	P62830 [36-43]
P23949	[K].SLANLNLNNMLDK.[K]	P23949 [21-33]
Q6ZWU9	[R].LVQSPNSYFMDVK.[C]	Q6ZWU9 [24-36]
P11499	[R].GFEVVYMTEPIDEYCVQQLK.[E]	P11499 [507-526]
Q8C196	[K].IALGIPLPEIK.[N]	Q8C196 [741-751]
P11499	[K].LGIHEDSTNR.[R]	P11499 [439-448]
Q9QUM9	[R].HITIFSPEGR.[L]	Q9QUM9 [12-21]
P27659	[R].ERLEQQVPVNQVFGQDEMIDVIGVTK.[DG]	P27659 [199-224]
P07356	[R].TNQELQEINR.[V]	P07356 [136-145]
Q6A0F1	[K].FAEAFEAIPR.[A]	Q6A0F1 [448-457]
P17751	[K].VTNGAFTGEISPGMIK.[D]	P17751 [120-135]
P09103	[K].VHSFPTLK.[F]	P09103 [439-446]
Q9JJI8	[K].IEEIKDFLLTAR.[R]	Q9JJI8 [5-16]
Q9EQD6	[K].YENELFLR.[Q]	Q9EQD6 [202-209]
Q3TEY6	[R].VEFTFPDFVTEGAR.[D]	Q3TEY6 [335-348]
Q3U182	[R].HGSGPNIILTGDSSPGFSK.[E]	Q3U182 [610-628]
Q9DBJ1	[R].YADLTEDQLPSCESLKDTIAR.[A]	Q9DBJ1 [142-162]
Q3UGA8	[K].IAVAHNGELVNAAR.[L]	Q3UGA8 [117-130]
P97298	[R].DTDTGALLFIGR.[I]	P97298 [399-410]
O08755	[-].MNAQLTMEAIGELHGVSHEPVPAPADLLGGSPHAR.[S]	O08755 [1-35]
Q5BLJ9	[K].NIDDGTSDRPYSHALVAGIDR.[Y]	Q5BLJ9 [28-48]
Q497I4	[R].QNQEYQVLLDVR.[A]	Q497I4 [376-387]
Q3TGU7	[R].LVKPGNQNTQVTEAWNK.[V]	Q3TGU7 [156-172]
Q6ZWU9	[R].LVQSPNSYFMDVK.[C]	Q6ZWU9 [24-36]
Q99KQ4	[K].YLLETSGNLDGLEYK.[L]	Q99KQ4 [175-189]
A0A0A0MQF6	[K].RVIISAPSADAPMFVMGVNHEK.[Y]	A0A0A0MQF6 [142-163]
Q9QWL7	[R].QFTSSSSIK.[G]	Q9QWL7 [7-15]
P06745	[R].FAAYFQQGDMESNGK.[Y]	P06745 [348-362]
Q8C196	[K].TVLMNPNIASVQTNEVGLK.[Q]	Q8C196 [459-477]
D3YX79	[R].LFQVEYAIEAIK.[L]	D3YX79 [21-32]
Q6IFX2; Q61781	[R].GQVGGDVNVEMDAAPGVDLSR.[I]	Q6IFX2 [241-261]; Q61781 [268-288]
Q9QUM9	[R].LYQVEYAFK.[A]	Q9QUM9 [22-30]
Q99LX0	[K].VTVAGLAGK.[D]	Q99LX0 [33-41]
Q3U4U6	[K].ELGIWEPLAVK.[L]	Q3U4U6 [492-502]
P14115	[R].NQSFCPTVNLDK.[L]	P14115 [66-77]
P11499	[R].APFDLFENK.[K]	P11499 [339-347]
Q9EPU0	[K].AGLSQSLFER.[L]	Q9EPU0 [684-693]
P86048	[K].MLSCAGADR.[LS]	P86048 [102-110]
P38647	[K].DAGQISGLNVLR.[V]	P38647 [207-218]
Q7TMK9	[R].KYGGPPPDSVYSGQQPSVGTEIFVGK.[I]	Q7TMK9 [143-168]
P62962	[K].CYEMASHLR.[R]	P62962 [128-136]
A0T1J8	[R].QQILQEMR.[K]	A0T1J8 [1491-1498]
Q8VHX6	[K].YGGDEIPYSPFR.[I]	Q8VHX6 [1617-1628]
Q91X84	[R].QPPVSPLTLSPGPEAHQGFSR.[Q]	Q91X84 [387-407]
Q9CW46	[K].DSGPLPTPPGVSLLGEPPKDYR.[I]	Q9CW46 [488-509]
Q9R0Y5	[K].YGYTHLSTGDLLR.[A]	Q9R0Y5 [32-44]
P17742	[K].EGMNIVEAMER.[F]	P17742 [134-144]
Q8VCG1	[K].HFIDVGAGVIDEDYR.[G]	Q8VCG1 [128-142]
Q03141	[R].TATYNGPPASPSLSHEATPLSQTR.[S]	Q03141 [574-597]
P09411	[K].WNTEDKVSHVSTGGGASLELLEGK.[V]	P09411 [383-406]
P80313	[R].YNFFTGCPK.[A]	P80313 [358-366]
Q3TQX5	[K].HVINFDLPSDIEEYVHR.[I]	Q3TQX5 [512-528]
Q3T9Y8	[K].GHFGPINSVAFHPDGK.[S]	Q3T9Y8 [283-298]
Q02257	[R].NLALCPANHAPLQEAAVIPR.[L]	Q02257 [507-526]
P05214	[R].LIGQIVSSITASLR.[F]	P05214 [230-243]
P19096	[K].FDASFFGVHPK.[Q]	P19096 [60-70]
A0A0A0MQF6	[K].VIHDNFGIVEGLMTTVHAITATQK.[T]	A0A0A0MQF6 [187-210]
Q6A0F1	[K].LFVTNDAATILR.[E]	Q6A0F1 [70-81]
P05214	[R].AFVHWYVGEGMEEGEFSEAREDLAALEK.[D]	P05214 [403-430]
O55142	[K].IEGVYAR.[D]	O55142 [30-36]
P30416	[K].LQAFSAAIESCNK.[A]	P30416 [332-344]
Q3TKG4	[R].VDILDPALLR.[S]	Q3TKG4 [398-407]
B2RTM0	[K].TVTAMDVVYALK.[R]	B2RTM0 [81-92]
Q5SW46	[R].FWWENPGVFTEK.[Q]	Q5SW46 [643-654]
Q61553	[K].YLTAEAFGFK.[V]	Q61553 [23-32]
Q3TIH9	[K].GQVCLPVISAENWKPATK.[T]	Q3TIH9 [83-100]
Q3UJI2	[K].TVALWDLR.[N]	Q3UJI2 [296-303]
Q9R1P4	[R].LVSLIGSK.[T]	Q9R1P4 [108-115]
Q9CQU0	[R].ILFLDPSGK.[V]	Q9CQU0 [113-121]
E9QAZ2	[R].NTLQLHR.[Y]	E9QAZ2 [196-202]
P47962	[R].DIICQIAYAR.[I]	P47962 [59-68]
Q3UIF3	[K].LGIHEDSQNR.[K]	Q3UIF3 [448-457]
Q9D0R2	[R].GFQEVVTPNIFNSR.[L]	Q9D0R2 [367-380]
P62717	[K].SSGEIVYCGQVFEK.[S]	P62717 [57-70]
Q4VAI2	[R].SPIAEAVFR.[K]	Q4VAI2 [20-28]
P11679	[K].WSLLQQQK.[T]	P11679 [129-136]
P20029	[K].SQIFSTASDNQPTVTIK.[V]	P20029 [449-465]
Q3UIF3	[R].YYTSASGDEMVSLK.[D]	Q3UIF3 [466-479]
G3UWG1	[R].ADLIAYLK.[K]	G3UWG1 [93-100]
Q8BLY1	[K].VISLPELK.[G]	Q8BLY1 [425-432]
P58252	[K].AYLPVNESFGFTADLR.[S]	P58252 [786-801]
A0A0G2JGL0	[R].SQWSPALTISK.[V]	A0A0G2JGL0 [91-101]
Q3TL71	[R].ILSISADIETIGEILKK.[I]	Q3TL71 [87-103]
P31254; B9EHN0	[K].SIPICTLK.[N]	P31254 [627-634]; B9EHN0 [628-635]
A2AFQ2	[K].GGIVGMTLPIAR.[D]	A2AFQ2 [183-194]
P60843	[R].ELAQQIQK.[V]	P60843 [111-118]
E9PW66	[K].YAVLYQPLFDK.[R]	E9PW66 [133-143]
Q99K87	[R].LIIAGTSAYAR.[L]	Q99K87 [220-230]
Q7TMK9	[K].AGPIWDLR.[L]	Q7TMK9 [185-192]
B2RTM0	[R].KTVTAMDVVYALK.[R]	B2RTM0 [80-92]
Q7TMK9	[R].TGYTLDVTTGQR.[K]	Q7TMK9 [131-142]
Q9QUM9	[K].LLDSSTVTHLFK.[I]	Q9QUM9 [60-71]
Q05186	[K].QATYGYYLGNPAEFHDSSDHHTFK.[K]	Q05186 [136-159]
Q3UZH3	[K].QGFGNLPICMAK.[T]	Q3UZH3 [857-868]
P09411	[K].KELNYFAK.[A]	P09411 [192-199]
P07356	[K].SALSGHLETVILGLLK.[T]	P07356 [89-104]
Q3TVV6	[K].SSGPTSLFAVTVAPPGAR.[Q]	Q3TVV6 [182-199]
A1A4T2	[R].FGAVWTGDNTAEWDHLK.[I]	A1A4T2 [633-649]
P02535	[R].VLDELTLSK.[S]	P02535 [256-264]
Q6A0D0	[K].LIALSIDSVEDHLAWSK.[D]	Q6A0D0 [71-87]
Q3UBS3	[K].GSFPWQAK.[M]	Q3UBS3 [112-119]
Q3UQC2	[K].VVLVLER.[T]	Q3UQC2 [362-368]
Q01853	[K].GVLFYGPPGCGK.[T]	Q01853 [513-524]
Q9JMH6	[KR].WGLGGTCVNVGCIPK.[K]	Q9JMH6 [167-181]
Q3UXQ6	[K].FDTGNLCMVTGGANLGR.[I]	Q3UXQ6 [175-191]
B2RQH0	[R].QEPSDSPMFIINR.[K]	B2RQH0 [201-213]
Q5M9L1	[R].EVCGFAPYER.[R]	Q5M9L1 [46-55]
P11983	[K].FATEAAITILR.[I]	P11983 [516-526]
Q9R1P1	[R].FGPYYTEPVIAGLDPK.[T]	Q9R1P1 [100-115]
P40142	[R].KLILDSAR.[A]	P40142 [543-550]
Q5FW97	[R].IGAEVYHNLK.[N]	Q5FW97 [184-193]
Q3UIF3	[R].YYTSASGDEMVSLKDYCTR.[M]	Q3UIF3 [466-484]
F7BGR7	[K].NYGFVHIEDK.[T]	F7BGR7 [152-161]
B9EHN0	[R].LDQPMTEIVSR.[V]	B9EHN0 [1011-1021]
P24547	[R].AMMYSGELK.[F]	P24547 [481-489]
Q9DCL9	[R].IATGSFLK.[R]	Q9DCL9 [103-110]
P58252	[K].GVQYLNEIKDSVVAGFQWATK.[E]	P58252 [668-688]
A2A5Y6	[K].IGSLDNITHVPGGGNKK.[I]	A2A5Y6 [662-678]
A6ZI44	[K].ELSDIAHR.[I]	A6ZI44 [69-76]
P60843	[K].GYDVIAQAQSGTGK.[T]	P60843 [69-82]
P20029	[R].IINEPTAAAIAYGLDKR.[E]	P20029 [199-215]
P58252	[R].ETVSEESNVLCLSK.[S]	P58252 [581-594]
P52480	[R].LAPITSDPTEAAAVGAVEASFK.[C]	P52480 [401-422]
Q60605	[R].HVLVTLGEK.[M]	Q60605 [111-119]
Q9D0E1	[R].AFITNIPFDVK.[W]	Q9D0E1 [72-82]
P70698	[R].GLGLSPDLVVCR.[C]	P70698 [206-217]
P01027	[K].SSVAVPYVIVPLK.[I]	P01027 [892-904]
E9Q557	[R].AQIDNLTR.[E]	E9Q557 [1405-1412]
Q3TL71	[K].IILDLISESPIK.[G]	Q3TL71 [208-219]
P62962	[K].TLVLLMGK.[E]	P62962 [109-116]
Q60605	[R].ALGQNPTNAEVLK.[V]	Q60605 [38-50]
A8DUK2	[R].LLVVYPWTQR.[YF]	A8DUK2 [36-45]
Q3TIX6	[K].IQIASESSGIPERPCVLTGTPESIEQAK.[R]	Q3TIX6 [111-138]
Q3U8M3	[K].YTCSFCGK.[T]	Q3U8M3 [37-44]
Q6ZWV7	[R].VLTVINQTQK.[E]	Q6ZWV7 [57-66]
Q3U4U6	[K].AMTGVEQWPYR.[A]	Q3U4U6 [428-438]
Q6A0D0	[R].NFDEILR.[V]	Q6A0D0 [159-165]
Q3UIF3	[K].KHLEINPDHSIIETLR.[Q]	Q3UIF3 [633-648]
P60710	[K].LCYVALDFEQEMATAASSSSLEK.[SG]	P60710 [216-238]
Q80UT7	[R].HWGGNVLGPK.[S]	Q80UT7 [240-249]
P97350	[R].SPNQNVQQAAAGALR.[N]	P97350 [299-313]
Q3U4U6	[K].IPGGIIEDSCVLR.[G]	Q3U4U6 [204-216]
Q9WV02	[R].GFAFVTFESPADAK.[D]	Q9WV02 [50-63]
B2CSK2	[K].AFYPEEISSMVLTK.[M]	B2CSK2 [115-128]
P24547	[K].QLLCGAAIGTHEDDKYR.[L]	P24547 [243-259]
P38647	[K].NAVITVPAYFNDSQR.[Q]	P38647 [188-202]
Q9CZI5	[K].AHLGTALK.[A]	Q9CZI5 [30-37]
Q02257	[R].LAEPSQLLK.[S]	Q02257 [116-124]
Q922F4	[R].EIVHIQAGQCGNQIGTK.[F]	Q922F4 [3-19]
Q6A0F1	[R].LVPGGGATEIELAK.[Q]	Q6A0F1 [415-428]
Q542I9	[R].IETLDPALIRPGR.[I]	Q542I9 [334-346]
Q542I9	[K].AVANQTSATFLR.[V]	Q542I9 [238-249]
Q3TQX5	[R].VGSTSENITQK.[V]	Q3TQX5 [408-418]
P50247	[K].VPAINVNDSVTK.[S]	P50247 [175-186]
Q32P04	[R].EYQELMNTK.[L]	Q32P04 [446-454]
O55142	[R].VMLYPSR.[I]	O55142 [103-109]
Q3TL71	[R].IITITGTQDQIQNAQYLLQNSVK.[SQ]	Q3TL71 [434-456]
Q571J8	[R].DQQNLPYGVTPASPSGHSQGR.[R]	Q571J8 [608-628]
P63038	[K].APGFGDNR.[K]	P63038 [302-309]
P56480	[R].VALTGLTVAEYFR.[D]	P56480 [282-294]
A0A0A6YX26	[K].LYTLVTYVPVTTFK.[NS]	A0A0A6YX26 [102-115]
P53996	[R].GFQFVSSSLPDICYR.[C]	P53996 [42-56]
E9Q557	[K].LGIYEAMK.[I]	E9Q557 [2284-2291]
A2AFQ2	[R].GVIINTASVAAFEGQVGQAAYSASK.[G]	A2AFQ2 [158-182]
Q3TJ21	[R].SLLINAVEASCIR.[T]	Q3TJ21 [252-264]
Q9ERD7	[R].KECENCDCLQGFQLTHSLGGGTGSGMGTLLISK.[V]	Q9ERD7 [122-154]
F7BGR7	[K].LFIGNLPR.[E]	F7BGR7 [120-127]
Q3TGR2	[R].QDGSVDFGR.[K]	Q3TGR2 [276-284]
P40142	[K].ISSDLDGHPVPK.[Q]	P40142 [103-114]
Q3UHW5; S4R232	[KR].IQLWDTAGQER.[FY]	Q3UHW5 [59-69]; S4R232 [59-69]
P31254	[R].YDGQVAVFGSDLQEK.[L]	P31254 [450-464]
F7DEU6; P24547	[K].NRDYPLASK.[D]	F7DEU6 [254-262]; P24547 [230-238]
O70251	[K].LVPVGYGIK.[K]	O70251 [177-185]
Q61781; Q9QWL7	[R].ALEEANTELEVK.[I]	Q61781 [141-152]; Q9QWL7 [104-115]
Q66K07	[R].ALSNLESIPGGYNALR.[R]	Q66K07 [249-264]
Q3TFF0	[K].VSLEDLYNGK.[T]	Q3TFF0 [122-131]
Q9D8N0	[K].ALIAAQYSGAQVR.[V]	Q9D8N0 [18-30]
Q3U4U6	[R].AVAQALEVIPR.[T]	Q3U4U6 [439-449]
P62827	[R].VCENIPIVLCGNK.[V]	P62827 [111-123]
Q9JJI8	[R].YLYTLVITDKEK.[A]	Q9JJI8 [41-52]
P62852	[R].AALQELLSK.[G]	P62852 [86-94]
P70124	[K].ILVVNAAYFVGK.[W]	P70124 [159-170]
P70124	[K].IIELPFQNK.[H]	P70124 [216-224]
Q3TIP8	[R].YLSNAYAR.[E]	Q3TIP8 [209-216]
P60710	[K].QEYDESGPSIVHR.[K-]	P60710 [360-372]
Q3TWG2	[K].YEQGTGCWQGPNR.[S]	Q3TWG2 [458-470]
Q8BL97	[R].NPPGFAFVEFEDPR.[D]	Q8BL97 [74-87]
P97461	[K].AQCPIVER.[L]	P97461 [64-71]
P62334	[K].ALQSVGQIVGEVLK.[Q]	P62334 [49-62]
P57759	[K].GALPLDTVTFYK.[TVS]	P57759 [39-50]
Q3UZH3	[R].QPSQGPTFGIK.[G]	Q3UZH3 [413-423]
Q02257	[R].VSVELTNSLFK.[H]	Q02257 [664-674]
P58252	[K].EDLYLKPIQR.[T]	P58252 [440-449]
P18760	[K].HELQANCYEEVKDR.[C]	P18760 [133-146]
Q5BLK1	[K].DIPGLTDTTVPR.[R]	Q5BLK1 [120-131]
E9Q557	[K].ITNLTQQLEQASIVK.[K]	E9Q557 [1624-1638]
E9Q557	[R].TLELQGLINDLQR.[E]	E9Q557 [1775-1787]
P27773	[K].FVMQEEFSR.[D]	P27773 [336-344]
P17742	[K].VKEGMNIVEAMER.[F]	P17742 [132-144]
Q921L4	[K].ESYSVYVYK.[VG]	Q921L4 [36-44]
P11499	[R].LVSSPCCIVTSTYGWTANMER.[I]	P11499 [584-604]
Q3TIV3; P11103	[K].MVDPEKPQLGMIDR.[W]	Q3TIV3 [143-156]; P11103 [143-156]
Q922F4	[R].AALVDLEPGTMDSVR.[S]	Q922F4 [63-77]
Q9DB79	[K].QPTIFQNK.[K]	Q9DB79 [13-20]
P99024	[K].FWEVISDEHGIDPTGTYHGDSDLQLDR.[I]	P99024 [20-46]
Q7TMM9	[K].FWEVISDEHGIDPTGSYHGDSDLQLER.[I]	Q7TMM9 [20-46]
P63038	[K].LSDGVAVLK.[V]	P63038 [397-405]
Q3TQX5	[K].QYPISLVLAPTR.[E]	Q3TQX5 [265-276]
E9Q557	[R].QVQNLVNK.[S]	E9Q557 [446-453]
Q9CXW3	[K].ISNYGWDQSDKFVK.[I]	Q9CXW3 [76-89]
P63038	[R].KPLVIIAEDVDGEALSTLVLNR.[L]	P63038 [269-290]
F6VW30; O70456; Q9CQV8	[R].VLSSIEQK.[TS]	F6VW30 [119-126]; O70456 [61-68]; Q9CQV8 [63-70]
P27773	[R].LAPEYEAAATR.[L]	P27773 [63-73]
Q3UXQ6	[K].GIPHLVTHDAR.[T]	Q3UXQ6 [135-145]
P56480	[K].VALVYGQMNEPPGAR.[A]	P56480 [265-279]
Q8C2Q7	[K].HTGPNSPDTANDGFVR.[L]	Q8C2Q7 [99-114]
Q9ET26	[R].YTFPCPYCPEK.[N]	Q9ET26 [140-150]
P60843; A0A0N4SVP8	[R].GIYAYGFEKPSAIQQR.[A]	P60843 [46-61]; A0A0N4SVP8 [52-67]
P97351	[K].ACQSIYPLHDVFVR.[K]	P97351 [200-213]
Q3UJW9	[K].MPLIGLGTWK.[S]	Q3UJW9 [14-23]
Q3UXQ6	[R].HPGSFDVVHVK.[D]	Q3UXQ6 [201-211]
A2AFQ2	[R].LVAGEMGQNEPDQGGQR.[G]	A2AFQ2 [141-157]
Q4VAG4	[K].AGNLGGGVVTIER.[S]	Q4VAG4 [53-65]
Q03265	[K].HALIIYDDLSK.[Q]	Q03265 [306-316]
Q3UIF3	[R].NPDDITNEEYGEFYK.[S]	Q3UIF3 [301-315]
Q571M2; Q61699; P48722	[R].GCALQCAILSPAFK.[V]	Q571M2 [463-476]; Q61699 [375-388]; P48722 [375-388]
P09411	[R].AHSSMVGVNLPQK.[A]	P09411 [172-184]
Q3UZH3	[K].FSDIQIR.[R]	Q3UZH3 [491-497]
P18760	[K].AVLFCLSEDK.[K]	P18760 [35-44]
E9PZF0	[R-].TFIAIKPDGVQR.[G]	E9PZF0 [7-18]; [122-133]
P17879	[K].MDKAQIHDLVLVGGSTR.[I]	P17879 [326-342]
P27773	[K].FVMQEEFSR.[D]	P27773 [336-344]
Q564E8	[R].RGPCIIYNEDNGIIK.[AG]	Q564E8 [205-219]
Q8C2Q3; F7BGR7	[K].IFVGNVSAACTSQELR.[S]	Q8C2Q3 [81-96]; F7BGR7 [81-96]
D3YWJ3	[K].TYSYLTPDLWK.[E]	D3YWJ3 [247-257]
Q05186	[R].VVRPDSELGERPPEDNQSFQYDHEAFLGK.[E]	Q05186 [32-60]
Q93092	[K].ALAGCDFLTISPK.[L]	Q93092 [246-258]
Q8BJX0	[R].NGYELSPTAAANFTR.[R]	Q8BJX0 [71-85]
O70194	[R].IFHTVTTTDDPVIR.[K]	O70194 [223-236]
P58252	[K].TGTITTFEHAHNMR.[V]	P58252 [482-495]
P97461	[R].VNQAIWLLCTGAR.[E]	P97461 [147-159]
Q149Z9	[R].SGVSLAALK.[K]	Q149Z9 [56-64]
P05214; P68373	[-].MRECISIHVGQAGVQIGNACWELYCLEHGIQPDGQMPSDK.[T]	P05214 [1-40]; P68373 [1-40]
P17751	[R].HVFGESDELIGQK.[V]	P17751 [151-163]
E9Q557	[R].LLQLQEQMR.[A]	E9Q557 [154-162]
Q6IFX2; Q9QWL7	[K].NHEEEMNALR.[G]	Q6IFX2 [231-240]; Q9QWL7 [221-230]
Q62029	[KR].SGVGNVFIK.[N]	Q62029 [96-104]
P31254; B9EHN0	[R].KPLLESGTLGTK.[G]	P31254 [592-603]; B9EHN0 [593-604]
P14152	[K].VIVVGNPANTNCLTASK.[S]	P14152 [126-142]
Q8BVQ9	[K].GVLLFGPPGTGK.[T]	Q8BVQ9 [253-264]
P58252	[K].ARPFPDGLAEDIDKGEVSAR.[Q]	P58252 [606-625]
Q9D0R2	[R].IYGISFPDPK.[L]	Q9D0R2 [296-305]
F7BGR7	[R].VADLTEQYNEQYGAVR.[T]	F7BGR7 [299-314]
Q3TN31	[R].LYQTDPSGTYHAWK.[AV]	Q3TN31 [144-157]
P60710	[R].TTGIVMDSGDGVTHTVPIYEGYALPHAILR.[L]	P60710 [148-177]
Q3U741	[K].TIIFVETK.[R]	Q3U741 [342-349]
Q3U4U6	[R].IVLLDSSLEYK.[K]	Q3U4U6 [238-248]
Q3UIF3	[K].HLEINPDHSIIETLR.[Q]	Q3UIF3 [634-648]
E9PYL9	[K].VLEQLTGQTPVFSK.[A]	E9PYL9 [39-52]
P35550	[K].VLYLGAASGTTVSHVSDIVGPDGLVYAVEFSHR.[S]	P35550 [169-201]
P97461	[K].YLPHSAGR.[Y]	P97461 [48-55]
O09061	[K].GAVYSFDPVGSYQR.[D]	O09061 [146-159]
Q32P04	[K].MFFDAELSQMQTHVSDTSVVLSMDNNR.[S]	Q32P04 [299-325]
P26041; Q3TCP5	[K].APDFVFYAPR.[L]	P26041 [264-273]; Q3TCP5 [264-273]
Q9R0H5; E9Q1Z0; P50446; P04104; Q6IME9; Q8BGZ7; Q8VED5; P07744; P11679; Q32P04; B2RTP7	[K].FASFIDKVR.[F]	Q9R0H5 [142-150]; E9Q1Z0 [154-162]; P50446 [163-171]; P04104 [199-207]; Q6IME9 [145-153]; Q8BGZ7 [161-169]; Q8VED5 [150-158]; P07744 [157-165]; P11679 [108-116]; Q32P04 [173-181]; B2RTP7 [210-218]
Q3TIV3; P11103	[R].MAIMVQSPMFDGK.[V]	Q3TIV3 [35-47]; P11103 [35-47]
P56480	[R].TIAMDGTEGLVR.[G]	P56480 [110-121]
P58252	[R].NMSVIAHVDHGK.[S]	P58252 [21-32]
Q8C1W9; E9PW66	[K].FYEEVHDLER.[K]	Q8C1W9 [84-93]; E9PW66 [122-131]
Q3UIF3; P11499	[R].TLTLVDTGIGMTK.[A]	Q3UIF3 [88-100]; P11499 [83-95]
Q3UAG2	[K].GILFVGSGVSGGEEGAR.[Y]	Q3UAG2 [120-136]
Q9EQD6	[R].GQTGGDVNVEMDAAPGVDLSR.[I]	Q9EQD6 [260-280]
Q9JMK2	[R].FDDKPDYSYLR.[QH]	Q9JMK2 [260-270]
P08249	[K].IFGVTTLDIVR.[A]	P08249 [166-176]
P58252	[K].STLTDSLVCK.[A]	P58252 [33-42]
Q9DBJ1	[R].HYGGLTGLNK.[A]	Q9DBJ1 [91-100]
P11499	[R].NPDDITQEEYGEFYK.[S]	P11499 [292-306]
Q564E8	[R].NIPGITLLNVSK.[L]	Q564E8 [223-234]
E9Q557	[K].QEAFSIR.[M]	E9Q557 [321-327]
Q3U4U6	[R].WSSLACNIALDAVK.[T]	Q3U4U6 [168-181]
Q543F6; Q99J95	[K].LADFGLAR.[ADILVEG]	Q543F6 [142-149]; Q99J95 [165-172]
Q91V99	[R].FVNVVPTFGK.[K]	Q91V99 [120-129]
P19324	[R].LYGPSSVSFADDFVR.[S]	P19324 [133-147]
Q3UIF3; P11499	[R].TLTIVDTGIGMTK.[A]	Q3UIF3 [88-100]; P11499 [83-95]
P63017	[K].VCNPIITK.[L]	P63017 [602-609]
P63017	[K].FELTGIPPAPR.[G]	P63017 [459-469]
P35550	[K].NLVPGESVYGEK.[R]	P35550 [116-127]
Q5SS40	[R].YLAEFATGNDR.[K]	Q5SS40 [131-141]
Q9DBJ1	[R].SYDVPPPPMEPDHPFYSNISK.[D]	Q9DBJ1 [118-138]
Q5BLJ9	[K].VVLVLAGR.[Y]	Q5BLJ9 [10-17]
Q3THH1	[K].GSFSEQGINEFLR.[E-]	Q3THH1 [379-391]
Q32P04	[R].VDALMDEINFMK.[M]	Q32P04 [287-298]
Q642L7	[K].TITLEVEPSDTIENVK.[A]	Q642L7 [12-27]
P50247	[K].VADIGLAAWGR.[K]	P50247 [9-19]
Q3UIF3	[R].LVTSPCCIVTSTYGWTANMER.[I]	Q3UIF3 [593-613]
Q3UCL7	[K].GCEVVVSGK.[L]	Q3UCL7 [133-141]
Q9DBP5	[K].YGYTHLSAGELLR.[D]	Q9DBP5 [27-39]
P97461	[K].GSSNSYAIK.[K]	P97461 [183-191]
P08730	[K].ITMQNLNDR.[L]	P08730 [98-106]
P27659	[R].HGSLGFLPR.[K]	P27659 [11-19]
P62301	[K].GLSQSALPYR.[R]	P62301 [10-19]
Q3THQ5	[R].LAYINPDLALEEK.[N]	Q3THQ5 [352-364]
Q3THQ5	[R].IGNSYFKEEK.[Y]	Q3THQ5 [306-315]
Q3TIV3; P11103	[K].MVDPEKPQLGMIDR.[W]	Q3TIV3 [143-156]; P11103 [143-156]
Q3UW40	[R].QINWTVLYR.[R]	Q3UW40 [48-56]
Q32MW3	[R].IAFSTSSLLK.[V]	Q32MW3 [241-250]
Q9D6F9	[K].MAATFIGNSTAIQELFKR.[I]	Q9D6F9 [363-380]
E9Q557	[K].FGDSNTVMR.[F]	E9Q557 [929-937]
Q8C2Q3	[R].YSGSYNDYLR.[A]	Q8C2Q3 [648-657]
P58252	[K].TGTITTFEHAHNMR.[V]	P58252 [482-495]
Q03265	[R].VLSIGDGIAR.[V]	Q03265 [74-83]
P53026	[R].ILGPGLNK.[A]	P53026 [123-130]
P20029	[R].ITPSYVAFTPEGER.[L]	P20029 [62-75]
Q3UBK2	[K].IKGEHPGLSIGDVAK.[K]	Q3UBK2 [113-127]
Q3TIV3	[R].VGTVIGSNK.[L]	Q3TIV3 [592-600]
Q3UA81	[K].SGDAAIVDMVPGKPMCVESFSDYPPLGR.[F]	Q3UA81 [396-423]
Q3TE95	[K].QQFVEYDK.[N]	Q3TE95 [142-149]
Q61553	[R].YLAPSGPSGTLK.[A]	Q61553 [230-241]
P80313	[K].LPIGDVATQYFADR.[D]	P80313 [293-306]
P63037	[K].QISQAYEVLADSK.[K]	P63037 [47-59]
Q8C2Q7	[R].STGEAFVQFASQEIAEK.[A]	Q8C2Q7 [151-167]
A0A097PUH2	[K].DTLMISR.[T]	A0A097PUH2 [269-275]
Q06477	[R].VGDVYIPR.[D]	Q06477 [86-93]
E9PUX4	[K].FVIATSTK.[V]	E9PUX4 [201-208]
P52480	[K].GADFLVTEVENGGSLGSK.[K]	P52480 [189-206]
Q7TMM9	[R].INVYYNEAAGNK.[Y]	Q7TMM9 [47-58]
P24547	[R].TSSAQVEGGVHSLHSYEK.[R]	P24547 [494-511]
P29341; A2A5N3	[R].YQGVNLYVK.[N]	P29341 [291-299]; A2A5N3 [291-299]
Q3TVV6	[R].NFILDQTNVSAAAQR.[R]	Q3TVV6 [552-566]
Q3TIX6	[K].IDSIPHLNNSTPLVDPSVYGYGVQK.[R]	Q3TIX6 [33-57]
Q564E8	[R].FCIWTESAFR.[K]	Q564E8 [249-258]
Q3TIJ4	[K].VGIEAAEMLLANLR.[H]	Q3TIJ4 [273-286]
Q564E8	[R].KLDELYGTWR.[K]	Q564E8 [259-268]
E9Q557	[R].QLQNIIQATSR.[E]	E9Q557 [283-293]
P62196; Q542I9	[K].GVILYGPPGTGK.[T]	P62196 [185-196]; Q542I9 [221-232]
P16125	[K].FIIPQIVK.[Y]	P16125 [120-127]
Q58EW0	[R].TNSTFNQVVLK.[R]	Q58EW0 [39-49]
Q3V0Z8; Q3U741	[R].QTLMWSATWPK.[E]	Q3V0Z8 [349-359]; Q3U741 [272-282]
E9QAZ2	[R].VLNSYWVGEDSTYK.[F]	E9QAZ2 [115-128]
P62717	[R].DLTTAGAVTQCYR.[D]	P62717 [99-111]
Q922F4	[K].MASTFIGNSTAIQELFK.[R]	Q922F4 [363-379]
E9Q557	[K].QQIQNDLNQWK.[T]	E9Q557 [1870-1880]
Q32P04	[K].HEISEMNR.[M]	Q32P04 [378-385]
P11499	[R].LVSSPCCIVTSTYGWTANMER.[I]	P11499 [584-604]
Q3THH1	[K].LAAVDATVNQVLASR.[Y]	Q3THH1 [222-236]
Q6IFX2; Q61781	[R].ILNEMRDQYEK.[M]	Q6IFX2 [262-272]; Q61781 [289-299]
P09041; P09411	[R].VDFNVPMK.[N]	P09041 [23-30]; P09411 [23-30]
P58252	[K].KEDLYLKPIQR.[T]	P58252 [439-449]
P17742	[K].HTGPGILSMANAGPNTNGSQFFICTAK.[T]	P17742 [92-118]
P05214; P68373	[-].MRECISIHVGQAGVQIGNACWELYCLEHGIQPDGQMPSDK.[T]	P05214 [1-40]; P68373 [1-40]
P62918	[R].ASGNYATVISHNPETK.[K]	P62918 [129-144]
E9PUX4	[R].YYPTEDVPR.[K]	E9PUX4 [123-131]
Q9CZI5	[R].KGHAVGDIPGVR.[F]	Q9CZI5 [108-119]
Q9QWL7	[R].GQVGGEINVEMDAAPGVDLSR.[I]	Q9QWL7 [231-251]
P20029	[K].MKETAEAYLGK.[K]	P20029 [154-164]
Q9CWK0	[K].LVAIVDVIDQNR.[A]	Q9CWK0 [24-35]
P50446	[R].TAAENEFVTLKK.[D]	P50446 [250-261]
B2RTM0	[R].DAVTYTEHAK.[R]	B2RTM0 [69-78]
P60710	[R].CPEALFQPSFLGMESCGIHETTFNSIMK.[C]	P60710 [257-284]
Q3U8M3	[K].TVAGGAWTYNTTSAVTVK.[S]	Q3U8M3 [63-80]
P63037	[K].NVVHQLSVTLEDLYNGATR.[K]	P63037 [106-124]
P24547	[R].YFSEADKIK.[V]	P24547 [430-438]
Q6IME9	[R].FLEQQNQVLETK.[W]	Q6IME9 [154-165]
P14115	[K].LWTLVSEQTR.[V]	P14115 [78-87]
Q3TIV3; P11103	[K].GGAAVDPDSGLEHSAHVLEK.[G]	Q3TIV3 [529-548]; P11103 [528-547]
P27773	[K].YGVSGYPTLK.[I]	P27773 [95-104]
Q8C2Q7	[R].GLPWSCSADEVQR.[F]	Q8C2Q7 [17-29]
Q3TIJ4	[R].VEVDGGIMEGGGQILR.[V]	Q3TIJ4 [6-21]
P35700	[K].ATAVMPDGQFK.[D]	P35700 [17-27]
Q3THQ5	[K].DPQALSEHLKNPVIAQK.[I]	Q3THQ5 [514-530]
P97461	[R].QAVDVSPLR.[R]	P97461 [137-145]
Q9QWL7	[K].DAEDWFFSK.[T]	Q9QWL7 [270-278]
P62852	[K].LITPAVVSER.[L]	P62852 [67-76]
D3Z1V4	[K].LYTLVLTDPDAPSR.[K]	D3Z1V4 [63-76]
Q8C2Q3	[R].TQSSASLAASYAAQQHPQAAASYR.[G]	Q8C2Q3 [518-541]
P04104	[K].RTNAENEFVTIK.[K]	P04104 [285-296]
P58252	[R].CLYASVLTAQPR.[L]	P58252 [728-739]
Q3US43	[K].TPAQFDADELR.[G]	Q3US43 [114-124]
Q3UXQ6	[K].FDTGNLCMVTGGANLGR.[I]	Q3UXQ6 [175-191]
P60710	[R].KDLYANTVLSGGTTMYPGLADR.[M]	P60710 [291-312]
A6ZI47; A6ZI44	[R].QLLLTADDR.[V]	A6ZI47 [61-69]; A6ZI44 [115-123]
Q32P04	[R].VDALMDEINFMK.[M]	Q32P04 [287-298]
P09411	[K].LTLDKLDVK.[G]	P09411 [7-15]
P63017	[K].NQVAMNPTNTVFDAK.[R]	P63017 [57-71]
Q9QWL7	[R].TKFETEQALR.[M]	Q9QWL7 [171-180]
Q80X90	[K].VLFASQEIPASPFR.[V]	Q80X90 [823-836]
Q3UW40	[K].VFQFLNAK.[C]	Q3UW40 [28-35]
P29341	[R].SLGYAYVNFQQPADAER.[A]	P29341 [51-67]
Q3TFF0	[K].NVLCSACSGQGGK.[S]	Q3TFF0 [140-152]
Q5FW97	[R].GNPTVEVDLYTAK.[G]	Q5FW97 [16-28]
P62301	[R].LILIESR.[I]	P62301 [115-121]
Q02257	[R].ALMGSPQLVAAVVR.[T]	Q02257 [178-191]
Q3T9S3	[R].IDFYFDENPYFENK.[V]	Q3T9S3 [136-149]
Q149Z9	[K].ALAAAGYDVEK.[N]	Q149Z9 [66-76]
P50446; Q6IFZ8	[K].QEIAEINR.[MI]	P50446 [368-375]; Q6IFZ8 [368-375]
Q9DBJ1	[R].FSGWYDADLSPAGHEEAK.[R]	Q9DBJ1 [22-39]
Q8VCG1	[R].GNVGVVLFNFGK.[E]	Q8VCG1 [143-154]
A2ARD6	[R].VAPVPLYNSFHDVYK.[F]	A2ARD6 [436-450]
D3YWN7	[R].LLTPTHSFLAR.[S]	D3YWN7 [229-239]
P09041	[K].ALMDEVVK.[A]	P09041 [354-361]
P27773	[K].GFPTIYFSPANK.[K]	P27773 [449-460]
P60335	[R].LVVPATQCGSLIGK.[G]	P60335 [102-115]
Q7TMM9; Q922F4	[R].IMNTFSVMPSPK.[V]	Q7TMM9 [163-174]; Q922F4 [163-174]
Q32P04	[R].VDALMDEINFMK.[M]	Q32P04 [287-298]
B2CSK2; P17879	[K].NALESYAFNMK.[S]	B2CSK2 [542-552]; P17879 [540-550]
Q6A0D0	[K].LSILYPATTGR.[N]	Q6A0D0 [148-158]
P24547	[R].VGMGSGSICITQEVLACGRPQATAVYK.[V]	P24547 [323-349]
P60710	[R].CPEALFQPSFLGMESCGIHETTFNSIMK.[C]	P60710 [257-284]
P11103	[R].HPDVEVDGFSELR.[W]	P11103 [66-78]
Q497E9	[R].LDVGNFSWGSECCTR.[K]	Q497E9 [60-74]
Q564E8	[K].NVTLPAVFK.[A]	Q564E8 [21-29]
P16125	[K].SADTLWDIQK.[D]	P16125 [320-329]
Q922F4	[R].ISEQFSAMFR.[R]	Q922F4 [381-390]
P63017	[K].NSLESYAFNMK.[A]	P63017 [540-550]
P58252	[R].YFDPANGK.[F]	P58252 [265-272]
G3UXL2	[R].VTAVIPCFPYAR.[Q]	G3UXL2 [85-96]
P09411	[K].ALESPERPFLAILGGAK.[V]	P09411 [200-216]
A0A0A0MQA5	[K].EIIDPVLDR.[I]	A0A0A0MQA5 [142-150]
P52480	[R].GDLGIEIPAEK.[V]	P52480 [295-305]
P09041; P09411	[K].VSHVSTGGGASLELLEGK.[IV]	P09041 [389-406]; P09411 [389-406]
Q922F4	[R].ISEQFSAMFR.[R]	Q922F4 [381-390]
P09411	[R].AHSSMVGVNLPQK.[A]	P09411 [172-184]
W6PPR4	[R].IIEVHIEK.[G]	W6PPR4 [2319-2326]
Q922F4	[R].AALVDLEPGTMDSVR.[S]	Q922F4 [63-77]
Q3TE95	[K].HYAMQEAK.[Q]	Q3TE95 [134-141]
P14069	[K].LQDAEIAR.[L]	P14069 [48-55]
Q02257	[R].LNYGIPAIVK.[L]	Q02257 [478-487]
Q5NCE8	[R].QLEAPVPPVMTSLPKK.[T]	Q5NCE8 [390-405]
Q6A0D0	[RK].DFTPVCTTELGR.[A]	Q6A0D0 [45-56]
Q61781	[R].ADLEMQIESLKEELAYLKK.[N]	Q61781 [239-257]
Q5I0T8	[K].LLADQAEAR.[R]	Q5I0T8 [154-162]
P14152	[K].NVIIWGNHSSTQYPDVNHAK.[V]	P14152 [180-199]
Q7TMM9	[K].ESESCDCLQGFQLTHSLGGGTGSGMGTLLISK.[I]	Q7TMM9 [123-154]
P63038	[R].GYISPYFINTSK.[G]	P63038 [222-233]
E9PZF0	[K].YMHSGPVVAMVWEGLNVVK.[T]	E9PZF0 [67-85]
P60335	[R].IITLTGPTNAIFK.[A]	P60335 [58-70]
P60710; P68134	[R-].HQGVMVGMGQK.[D]	P60710 [40-50]; P68134 [42-52]
P63038	[R].AAVEEGIVLGGGCALLR.[C]	P63038 [430-446]
Q3V0Z8; Q3U741; Q3TQX5	[R].MLDMGFEPQIR.[KR]	Q3V0Z8 [328-338]; Q3U741 [251-261]; Q3TQX5 [352-362]
P52480	[R].RFDEILEASDGIMVAR.[G]	P52480 [279-294]
P52480	[R].EAEAAIYHLQLFEELRR.[L]	P52480 [384-400]
B7U582; P63017	[K].STAGDTHLGGEDFDNR.[M]	B7U582 [224-239]; P63017 [221-236]
P56480	[K].GSITSVQAIYVPADDLTDPAPATTFAHLDATTVLSR.[A]	P56480 [352-387]
P20029	[K].VTHAVVTVPAYFNDAQR.[Q]	P20029 [166-182]
Q02257	[K].LLNQPNQWPLVK.[A]	Q02257 [488-499]
H3BJQ7	[R].LLADPTGAFGK.[A]	H3BJQ7 [148-158]
B2CSK2; P17879	[K].NALESYAFNMK.[S]	B2CSK2 [542-552]; P17879 [540-550]
P52480	[K].KGVNLPGAAVDLPAVSEK.[D]	P52480 [207-224]
Q497I4	[R].LASYLEK.[V]	Q497I4 [108-114]
E9Q1Z0; P50446; Q8BGZ7; Q8VED5	[RK].SRAEAESWYQTK.[Y]	E9Q1Z0 [326-337]; P50446 [337-348]; Q8BGZ7 [335-346]; Q8VED5 [325-336]
P63017	[K].NSLESYAFNMK.[A]	P63017 [540-550]
Q5FW97	[K].TIAPALVSK.[K]	Q5FW97 [72-80]
P52480	[K].ITLDNAYMEK.[C]	P52480 [142-151]
P20029	[K].MKETAEAYLGK.[K]	P20029 [154-164]
P63038	[R].TVIIEQSWGSPK.[V]	P63038 [61-72]
P09411	[K].FCLDNGAK.[S]	P09411 [49-56]
Q9DB79	[K].NMSVHLSPCFR.[D]	Q9DB79 [108-118]
F7DEU6; P24547	[K].EANEILQR.[S]	F7DEU6 [220-227]; P24547 [196-203]
P62855	[R].NIVEAAAVR.[D]	P62855 [43-51]
P24547	[K].YEQGFITDPVVLSPK.[D]	P24547 [110-124]
P54775	[R].ADTLDPALLRPGR.[L]	P54775 [314-326]
A2A5Y6	[K].LDLSNVQSK.[C]	A2A5Y6 [590-598]
Q3TIJ4	[R].VSTALSCLLGLPLR.[V]	Q3TIJ4 [22-35]
P56480	[K].AHGGYSVFAGVGER.[T]	P56480 [226-239]
Q7TMM9; Q9D6F9; P99024; P68372	[R].SGPFGQIFRPDNFVFGQSGAGNNWAK.[G]	Q7TMM9 [78-103]; Q9D6F9 [78-103]; P99024 [78-103]; P68372 [78-103]
E9Q557	[R].LLEAQIATGGIIDPK.[E]	E9Q557 [2379-2393]
P35700	[K].ADEGISFR.[G]	P35700 [121-128]
A0A0A0MQF6	[K].QASEGPLK.[G]	A0A0A0MQF6 [288-295]
Q7TMM9; Q9D6F9; P99024; P68372	[R].LHFFMPGFAPLTSR.[G]	Q7TMM9 [263-276]; Q9D6F9 [263-276]; P99024 [263-276]; P68372 [263-276]
P40142	[K].HQPTAIIAK.[T]	P40142 [233-241]
Q3TIV3; P11103	[K].GIYFADMVSK.[S]	Q3TIV3 [894-903]; P11103 [893-902]
P54775	[R].VVGSEFVQK.[Y]	P54775 [230-238]
P16125	[K].IVVVTAGVR.[Q]	P16125 [92-100]
Q921L4	[K].AMGIMNSFVNDIFER.[I]	Q921L4 [59-73]
Q497E9	[K].NCIVLIDSTPYR.[Q]	Q497E9 [99-110]
P60710; P68134	[R-].HQGVMVGMGQK.[D]	P60710 [40-50]; P68134 [42-52]
P29341; A2A5N3; Q62029	[K].GFGFVCFSSPEEATK.[A]	P29341 [334-348]; A2A5N3 [334-348]; Q62029 [334-348]
P63017	[K].NQVAMNPTNTVFDAK.[R]	P63017 [57-71]
Q3UIF3; P11499	[K].VILHLKEDQTEYLEER.[R-]	Q3UIF3 [186-201]; P11499 [181-196]
D3YWN7	[R].LSSSSATLLNSPDR.[A]	D3YWN7 [199-212]
A0A077S9N1	[R].STDYGIFQINSR.[Y]	A0A077S9N1 [69-80]
P11499	[K].EQVANSAFVER.[V]	P11499 [492-502]
Q6P3D0	[R].VVAHFYAK.[R]	Q6P3D0 [106-113]
P56480	[K].IGLFGGAGVGK.[T]	P56480 [202-212]
Q3UZH3	[R].LDIDPETITWQR.[V]	Q3UZH3 [523-534]
Q3TIV3	[K].ASLCISTK.[K]	Q3TIV3 [427-434]
E9Q0F0	[R].SLNNQFASFIDKVR.[F]	E9Q0F0 [111-124]
A2A5Y6	[K].KLDLSNVQSK.[C]	A2A5Y6 [589-598]
P58252	[R].GHVFEESQVAGTPMFVVK.[A]	P58252 [768-785]
Q3TQX5	[R].VGNLGLATSFFNER.[N]	Q3TQX5 [535-548]
Q5FW97; P21550	[K].VNQIGSVTESIQACK.[L]	Q5FW97 [344-358]; P21550 [344-358]
A0A0A0MQA5	[K].DVNAAIAAIK.[T]	A0A0A0MQA5 [356-365]
P52480	[K].CCSGAIIVLTK.[S]	P52480 [423-433]
P56480	[R].AIAELGIYPAVDPLDSTSR.[I]	P56480 [388-406]
P62962	[K].DSPSVWAAVPGK.[T]	P62962 [27-38]
B2RTP7	[K].KYEDEINKR.[T]	B2RTP7 [288-296]
P17742	[R].IIPGFMCQGGDFTR.[H]	P17742 [56-69]
P11499	[R].YHTSQSGDEMTSLSEYVSR.[M]	P11499 [457-475]
P17879	[K].NQVALNPQNTVFDAK.[R]	P17879 [57-71]
Q3TIV3; P11103	[K].GIYFADMVSK.[S]	Q3TIV3 [894-903]; P11103 [893-902]
A6ZI44	[K].GVVPLAGTNGETTTQGLDGLSER.[C]	A6ZI44 [166-188]
P07356	[R].QDIAFAYQR.[R]	P07356 [69-77]
Q3UA81	[K].SGDAAIVDMVPGKPMCVESFSDYPPLGR.[F]	Q3UA81 [396-423]
Q3UW40	[R].AITGASLADIMAK.[R]	Q3UW40 [81-93]
P17879	[K].AQIHDLVLVGGSTR.[I]	P17879 [329-342]
P08730; Q9QWL7	[R].LASYLDKVR.[A]	P08730 [107-115]; Q9QWL7 [95-103]
Q9D618	[R].NTMLLCDGSCIDIIQNAFK.[A]	Q9D618 [235-253]
Q3UCL7	[R].ACYGVLR.[F]	Q3UCL7 [118-124]
Q6ZWN5	[K].LIGEYGLR.[N]	Q6ZWN5 [31-38]
P68373	[R].AVFVDLEPTVIDEVR.[TA]	P68373 [65-79]
P11499	[K].HLEINPDHPIVETLR.[Q]	P11499 [625-639]
P26041; Q3TCP5	[K].IGFPWSEIR.[N]	P26041 [238-246]; Q3TCP5 [238-246]
P11499	[R].RAPFDLFENK.[K]	P11499 [338-347]
A2AFQ2	[K].GGIVGMTLPIAR.[D]	A2AFQ2 [183-194]
P99024	[K].FWEVISDEHGIDPTGTYHGDSDLQLDR.[I]	P99024 [20-46]
B7U582	[R].GPAIGIDLGTTYSCVGVFQHGK.[V]	B7U582 [5-26]
P56480	[K].VVDLLAPYAK.[G]	P56480 [189-198]
P62827	[K].LVLVGDGGTGK.[T]	P62827 [13-23]
P16125	[R].GLTSVINQK.[L]	P16125 [300-308]
P02535	[R].AETECQNAEYQQLLDIK.[T]	P02535 [421-437]
E9Q1Z0; P50446; Q8BGZ7; Q8VED5	[R].AEAESWYQTK.[Y]	E9Q1Z0 [328-337]; P50446 [339-348]; Q8BGZ7 [337-346]; Q8VED5 [327-336]
Q3TIV3; P11103	[K].SDAYYCTGDVTAWTK.[C]	Q3TIV3 [307-321]; P11103 [306-320]
P63017	[K].TVTNAVVTVPAYFNDSQR.[QL]	P63017 [138-155]
P24547	[K].FVPYLIAGIQHSCQDIGAK.[S]	P24547 [456-474]
Q3V0Z8; Q3U741; Q3TQX5	[R].MLDMGFEPQIR.[KR]	Q3V0Z8 [328-338]; Q3U741 [251-261]; Q3TQX5 [352-362]
P24547	[K].VAQGVSGAVQDK.[G]	P24547 [439-450]
P62827	[K].NLQYYDISAK.[S]	P62827 [143-152]
Q3UXQ6	[R].LSNIFVIGK.[G]	Q3UXQ6 [222-230]
Q9DB79	[K].NMSVHLSPCFR.[D]	Q9DB79 [108-118]
P52480	[R].RFDEILEASDGIMVAR.[G]	P52480 [279-294]
Q6IFX2; Q61781; Q9QWL7	[R].MSVEADINGLR.[R]	Q6IFX2 [191-201]; Q61781 [218-228]; Q9QWL7 [181-191]
O70569	[K].TPGPGAQSALR.[A]	O70569 [107-117]
P50446	[R].TAAENEFVTLK.[K]	P50446 [250-260]
Q497E9	[K].ISSLLEEQFQQGK.[L]	Q497E9 [158-170]
P17751	[K].IAVAAQNCYK.[V]	P17751 [110-119]
P05214	[K].EIVDLVLDR.[I]	P05214 [113-121]
Q7TMM9; Q9ERD7; P99024; P68372; Q922F4	[K].GHYTEGAELVDSVLDVVRK.[E]	Q7TMM9 [104-122]; Q9ERD7 [104-122]; P99024 [104-122]; P68372 [104-122]; Q922F4 [104-122]
P52480	[K].GDYPLEAVR.[M]	P52480 [368-376]
P60710; P68134	[R].DLTDYLMK.[I]	P60710 [184-191]; P68134 [186-193]
Q3TIV3; P11103	[R].TTNFAGILSQGLR.[I]	Q3TIV3 [866-878]; P11103 [865-877]
Q497E9	[R].QWYESHYALPLGR.[K]	Q497E9 [111-123]
Q3TIV3; P11103	[R].IAPPEAPVTGYMFGK.[G]	Q3TIV3 [879-893]; P11103 [878-892]
Q6ZWU9	[R].LTEGCSFR.[R]	Q6ZWU9 [73-80]
P27661	[R].AGLQFPVGR.[VI]	P27661 [22-30]
P68373; A0A0A0MQA5	[R].EDMAALEK.[D]	P68373 [423-430]; A0A0A0MQA5 [452-459]
A6ZI44	[R].ALANSLACQGK.[Y]	A6ZI44 [386-396]
Q61781	[R].ADLEMQIESLKEELAYLK.[K]	Q61781 [239-256]
F6YVP7	[K].IPDWFLNR.[Q]	F6YVP7 [79-86]
Q9WTL4	[R].SEVTELRR.[L]	Q9WTL4 [37-44]
P11499	[K].SIYYITGESK.[E]	P11499 [482-491]
E9PZF0	[R].GDFCIQVGR.[NT]	E9PZF0 [106-114]; [221-229]
Q3UIF3	[K].FYEQFSK.[N]	Q3UIF3 [438-444]
P62830	[K].ECADLWPR.[I]	P62830 [124-131]
P62827	[K].FNVWDTAGQEK.[F]	P62827 [61-71]
P17879	[K].LLQDFFNGR.[D]	P17879 [349-357]
P11103	[K].TLGDFAAEYAK.[S]	P11103 [109-119]
A0A0A6YX26	[R].SAINEVVTR.[E]	A0A0A6YX26 [15-23]
A6ZI47; A6ZI44	[K].GILAADESTGSIAK.[R]	A6ZI47 [29-42]; A6ZI44 [83-96]
Q3TIV3; P11103	[K].KPPLLNNADSVQAK.[V]	Q3TIV3 [748-761]; P11103 [747-760]
P52480	[R].NTGIICTIGPASR.[S]	P52480 [44-56]
A0A0A0MQF6	[R].VIISAPSADAPMFVMGVNHEK.[Y]	A0A0A0MQF6 [143-163]
Q32P04	[R].TTAENEFVMLKK.[D]	Q32P04 [260-271]
Q02257	[R].NEGTATYAAAVLFR.[I]	Q02257 [638-651]
P63017	[K].DAGTIAGLNVLR.[I]	P63017 [160-171]
P11152	[R].ITGLDPAGPNFEYAEAPSR.[L]	P11152 [179-197]
Q3TIV3; P11103	[K].KFYPLEIDYGQDEEAVKK.[L]	Q3TIV3 [637-654]; P11103 [636-653]
A0A0A0MQA5	[K].TIGGGDDSFTTFFCETGAGK.[H]	A0A0A0MQA5 [70-89]
Q3UA81	[K].EVSTYIK.[K]	Q3UA81 [173-179]
P35700	[R].TIAQDYGVLK.[A]	P35700 [111-120]
P56480	[R].FTQAGSEVSALLGR.[I]	P56480 [311-324]
E9PZF0	[R].VMLGETNPADSKPGTIR.[G]	E9PZF0 [89-105]; [204-220]
Q3UCL7	[K].AELNEFLTR.[E]	Q3UCL7 [19-27]
Q921L4	[R].LLLPGELAK.[H]	Q921L4 [101-109]
Q3UIF3	[R].ALLFVPR.[R]	Q3UIF3 [340-346]
B2CSK2	[K].NQVAMNPQNTVFDAK.[R]	B2CSK2 [59-73]
A6ZI44	[K].IGEHTPSALAIMENANVLAR.[Y]	A6ZI44 [208-227]
P17742	[R].VSFELFADKVPK.[AT]	P17742 [20-31]
Q3V0Z8	[K].FVINYDYPNSSEDYIHR.[I]	Q3V0Z8 [487-503]
P24547	[R].HGFCGIPITDTGR.[M]	P24547 [137-149]
P11499	[K].SLTNDWEDHLAVK.[H]	P11499 [307-319]
P63017	[K].SQIHDIVLVGGSTR.[I]	P63017 [329-342]
Q6IFX2	[R].ALEEANADLEVK.[I]	Q6IFX2 [114-125]
B7U582; P63017	[R].FEELNADLFR.[G]	B7U582 [305-314]; P63017 [302-311]
P17742	[RK].SIYGEKFEDENFILK.[HF]	P17742 [77-91]
Q642L7	[K].ESTLHLVLR.[LV]	Q642L7 [64-72]
Q9Z2L2	[R].VSLDVNHFAPDELTVK.[T]	Q9Z2L2 [20-35]
Q7TMM9; Q9D6F9; Q9ERD7; P99024; P68372; Q922F4	[R].KLAVNMVPFPR.[L]	Q7TMM9 [252-262]; Q9D6F9 [252-262]; Q9ERD7 [252-262]; P99024 [252-262]; P68372 [252-262]; Q922F4 [252-262]
P35700	[R].LVQAFQFTDK.[H]	P35700 [159-168]
B2CSK2; P17879	[K].DAGVIAGLNVLR.[I]	B2CSK2 [162-173]; P17879 [160-171]
P45591	[K].KEDLVFIFWAPESAPLK.[S]	P45591 [96-112]
B2RTM0	[K].TVTAMDVVYALK.[R]	B2RTM0 [81-92]
E9PZF0	[R].VMLGETNPADSKPGTIR.[G]	E9PZF0 [89-105]; [204-220]
Q7TMM9; Q9D6F9; P99024; P68372	[K].TAVCDIPPR.[G]	Q7TMM9 [351-359]; Q9D6F9 [351-359]; P99024 [351-359]; P68372 [351-359]
Q05186	[R].HWILPQDYDHAQAEAR.[H]	Q05186 [265-280]
P68373	[K].AYHEQLTVAEITNACFEPANQMVK.[C]	P68373 [281-304]
Q6IFX2; Q61781	[R].GQVGGDVNVEMDAAPGVDLSR.[I]	Q6IFX2 [241-261]; Q61781 [268-288]
P52480	[K].GVNLPGAAVDLPAVSEK.[D]	P52480 [208-224]
Q9EQD6	[R].GQTGGDVNVEMDAAPGVDLSR.[I]	Q9EQD6 [260-280]
P17751	[R].IIYGGSVTGATCK.[E]	P17751 [257-269]
Q7TMM9; Q9D6F9; P99024; P68372	[R].LHFFMPGFAPLTSR.[G]	Q7TMM9 [263-276]; Q9D6F9 [263-276]; P99024 [263-276]; P68372 [263-276]
P50446; Q8BGZ7; Q6IFZ8	[K].YEELQVTAGR.[H]	P50446 [349-358]; Q8BGZ7 [347-356]; Q6IFZ8 [349-358]
P05214; A0A0A0MQA5	[K].AYHEQLSVAEITNACFEPANQMVK.[C]	P05214 [281-304]; A0A0A0MQA5 [310-333]
P17751	[K].ELASQPDVDGFLVGGASLKPEFVDIINAK.[Q]	P17751 [270-298]
Q32P04	[R].TTAENEFVMLK.[K]	Q32P04 [260-270]
G5E8N5	[K].SADTLWGIQK.[E]	G5E8N5 [348-357]
P11103	[R].VVSEDFLQDVSASTK.[S]	P11103 [453-467]
Q497E9	[R].IIDVVYNASNNELVR.[T]	Q497E9 [78-92]
Q7TMM9	[K].ESESCDCLQGFQLTHSLGGGTGSGMGTLLISK.[I]	Q7TMM9 [123-154]
P60710; P68134	[K].IWHHTFYNELR.[V]	P60710 [85-95]; P68134 [87-97]
Q3UA81	[K].SGDAAIVDMVPGKPMCVESFSDYPPLGR.[F]	Q3UA81 [396-423]
P45591; P18760	[R].YALYDATYETK.[E]	P45591 [82-92]; P18760 [82-92]
Q9D6F9	[K].GHYTEGAELVDAVLDVVR.[K]	Q9D6F9 [104-121]
P40142	[K].ILATPPQEDAPSVDIANIR.[M]	P40142 [284-302]
A2A5Y6	[K].IGSLDNITHVPGGGNK.[K]	A2A5Y6 [662-677]
Q9ERD7; Q922F4	[R].YLTVATVFR.[G]	Q9ERD7 [310-318]; Q922F4 [310-318]
Q3UA81	[R].EHALLAYTLGVK.[Q]	Q3UA81 [135-146]
B2CSK2	[K].NQVAMNPQNTVFDAK.[R]	B2CSK2 [59-73]
G5E8N5	[K].LVIITAGAR.[MQL]	G5E8N5 [120-128]
Q3V0Z8; Q3U741; Q3TQX5	[R].MLDMGFEPQIR.[KR]	Q3V0Z8 [328-338]; Q3U741 [251-261]; Q3TQX5 [352-362]
Q564E8	[R].QPYAVSELAGHQTSAESWGTGR.[A]	Q564E8 [50-71]
Q3UA81	[K].YYVTIIDAPGHR.[D]	Q3UA81 [85-96]
P99024	[R].ALTVPELTQQVFDAK.[N]	P99024 [283-297]
P24547	[R].FGVPVIADGGIQNVGHIAK.[A]	P24547 [357-375]
Q922F4	[K].LTTPTYGDLNHLVSATMSGVTTSLR.[F]	Q922F4 [217-241]
Q32P04	[K].YEELQQTAGR.[H]	Q32P04 [359-368]
Q546G4	[K].SLHTLFGDK.[L]	Q546G4 [89-97]
P27661	[R].HLQLAIR.[NG]	P27661 [83-89]
F6VW30; O70456; Q9CQV8; P63101; Q5SS40	[R].NLLSVAYK.[N]	F6VW30 [100-107]; O70456 [42-49]; Q9CQV8 [44-51]; P63101 [42-49]; Q5SS40 [43-50]
A0A0A0MQF6	[R].VIISAPSADAPMFVMGVNHEK.[Y]	A0A0A0MQF6 [143-163]
Q642L7	[R].TLSDYNIQK.[E]	Q642L7 [55-63]
Q8VED5; P11679; Q32P04	[K].NKYEDEINK.[R]	Q8VED5 [228-236]; P11679 [183-191]; Q32P04 [250-258]
P24547	[K].KYEQGFITDPVVLSPK.[D]	P24547 [109-124]
P18760	[K].LGGSAVISLEGKPL.[-]	P18760 [153-166]
P17879	[R].IINEPTAAAIAYGLDR.[T]	P17879 [172-187]
P68373	[K].EIIDLVLDR.[I]	P68373 [113-121]
P17742	[R].VSFELFADK.[V]	P17742 [20-28]
B2RTM0	[R].DNIQGITKPAIR.[R]	B2RTM0 [25-36]
Q5M9N9	[R].QITVNDLPVGR.[S]	Q5M9N9 [140-150]
P24547	[K].NLIDAGVDALR.[V]	P24547 [312-322]
Q5FW97; P21550	[R].AAVPSGASTGIYEALELR.[D]	Q5FW97 [33-50]; P21550 [33-50]
P62830	[K].GSAITGPVAK.[E]	P62830 [114-123]
Q6IFX2; Q9EQD6; Q61781	[KR].DYSPYFK.[T]	Q6IFX2 [140-146]; Q9EQD6 [159-165]; Q61781 [167-173]
P60710	[R].TTGIVMDSGDGVTHTVPIYEGYALPHAILR.[L]	P60710 [148-177]
B2RTP7	[R].LLRDYQELMNTK.[L]	B2RTP7 [480-491]
Q3UIF3; P11499	[K].ADLINNLGTIAK.[S]	Q3UIF3 [101-112]; P11499 [96-107]
P97351	[K].TTDGYLLR.[L]	P97351 [129-136]
P60710; P68134	[K].EITALAPSTMK.[I]	P60710 [316-326]; P68134 [318-328]
Q3UCL7	[R].GLCAIAQAESLR.[Y]	Q3UCL7 [95-106]
P60710; P68134	[R].DLTDYLMK.[I]	P60710 [184-191]; P68134 [186-193]
B2RTM0	[R].ISGLIYEETR.[G]	B2RTM0 [47-56]
Q3TXK6	[K].SFQQELDAR.[H]	Q3TXK6 [41-49]
P60710; P68134	[K].EITALAPSTMK.[I]	P60710 [316-326]; P68134 [318-328]
P02301	[K].STELLIR.[K]	P02301 [58-64]
B2RTP7	[R].DYQELMNTK.[L]	B2RTP7 [483-491]
P99024	[K].MAVTFIGNSTAIQELFK.[R]	P99024 [363-379]
P02535	[K].QSLEASLAETEGR.[Y]	P02535 [385-397]
Q7TMM9; Q9D6F9; P99024; P68372	[K].LTTPTYGDLNHLVSATMSGVTTCLR.[F]	Q7TMM9 [217-241]; Q9D6F9 [217-241]; P99024 [217-241]; P68372 [217-241]
Q7TMM9; P99024; P68372	[K].EVDEQMLNVQNK.[N]	Q7TMM9 [325-336]; P99024 [325-336]; P68372 [325-336]
Q9D6F9; P99024; P68372	[R].KEAESCDCLQGFQLTHSLGGGTGSGMGTLLISK.[I]	Q9D6F9 [122-154]; P99024 [122-154]; P68372 [122-154]
Q6IFX2	[R].TKYETELNLR.[M]	Q6IFX2 [181-190]
P50446; Q8BGZ7; P07744; Q32P04	[K].LALDVEIATYR.[K]	P50446 [445-455]; Q8BGZ7 [443-453]; P07744 [439-449]; Q32P04 [455-465]
P60710; P68134	[K].AGFAGDDAPR.[A]	P60710 [19-28]; P68134 [21-30]
P60710	[K].DLYANTVLSGGTTMYPGLADR.[M]	P60710 [292-312]
P60843	[R].VLITTDLLAR.[GS]	P60843 [325-334]
P17751	[K].VVLAYEPVWAIGTGK.[T]	P17751 [211-225]
G5E8N5; P16125	[R].VIGSGCNLDSAR.[F]	G5E8N5 [187-198]; P16125 [159-170]
Q7TMM9; P68372	[K].MSATFIGNSTAIQELFK.[R]	Q7TMM9 [363-379]; P68372 [363-379]
Q922F4	[K].MASTFIGNSTAIQELFK.[R]	Q922F4 [363-379]
Q9ERD7	[K].MSSTFIGNSTAIQELFK.[R]	Q9ERD7 [363-379]
Q3TIV3; P11103	[R].IAPPEAPVTGYMFGK.[G]	Q3TIV3 [879-893]; P11103 [878-892]
D3YWJ3	[R].GTGIVSAPVPK.[K]	D3YWJ3 [201-211]
Q8C1B2	[K].KASYSHNFSK.[K]	Q8C1B2 [568-577]
P52480	[R].APIIAVTR.[N]	P52480 [448-455]
Q9D6F9; P68372	[K].FWEVISDEHGIDPTGTYHGDSDLQLER.[I]	Q9D6F9 [20-46]; P68372 [20-46]
Q6IFX2; Q9EQD6; P08730; Q61782; Q61781; Q9QWL7	[K].TRLEQEIATYR.[RSN]	Q6IFX2 [385-395]; Q9EQD6 [404-414]; P08730 [388-398]; Q61782 [28-38]; Q61781 [412-422]; Q9QWL7 [375-385]
Q3UA81	[R].VETGVLKPGMVVTFAPVNVTTEVK.[S]	Q3UA81 [267-290]
Q9DB79	[R].DVQIGDIVTVGECRPLSK.[T]	Q9DB79 [119-136]
Q7TMM9	[R].KESESCDCLQGFQLTHSLGGGTGSGMGTLLISK.[I]	Q7TMM9 [122-154]
Q6IFX2	[K].DAEEWFFTK.[T]	Q6IFX2 [280-288]
P60710	[K].DLYANTVLSGGTTMYPGLADR.[M]	P60710 [292-312]
B2RTM0	[K].VFLENVIR.[D]	B2RTM0 [61-68]
P09411	[K].ITLPVDFVTADKFDENAK.[T]	P09411 [280-297]
Q61782	[R].LLEGEDAHLSSSQFSSGSQSSR.[D]	Q61782 [40-61]
P27661	[R].VGAGAPVYLAAVLEYLTAEILELAGNAAR.[D]	P27661 [44-72]
P05214; P68373; A0A0A0MQA5	[K].FDLMYAK.[RK]	P05214 [395-401]; P68373 [395-401]; A0A0A0MQA5 [424-430]
A0A0A0MQF6	[K].VIHDNFGIVEGLMTTVHAITATQK.[T]	A0A0A0MQF6 [187-210]
P17742	[R].IIPGFMCQGGDFTR.[H]	P17742 [56-69]
Q7TMM9; Q9D6F9; P99024; P68372	[K].LTTPTYGDLNHLVSATMSGVTTCLR.[F]	Q7TMM9 [217-241]; Q9D6F9 [217-241]; P99024 [217-241]; P68372 [217-241]
Q3UIF3; P11499; Q3TK29	[R].GVVDSEDLPLNISR.[E]	Q3UIF3 [388-401]; P11499 [379-392]; Q3TK29 [391-404]
	[R].AVMVDLEPTVVDEVR.[A]
P05214	[R].AVFVDLEPTVVDEVR.[T]	P05214 [65-79]
P68134	[KR].YPIEHGIITNWDDMEK.[I]	P68134 [71-86]
P62830	[R].ISLGLPVGAVINCADNTGAK.[N]	P62830 [16-35]
Q3UA81	[K].STTTGHLIYK.[C]	Q3UA81 [21-30]
B7U582; P63017	[K].LLQDFFNGK.[E]	B7U582 [352-360]; P63017 [349-357]
B2RTP7	[K].VDPEIQNVK.[S]	B2RTP7 [188-196]
P09041; P09411	[K].LGDVYVNDAFGTAHR.[A]	P09041 [157-171]; P09411 [157-171]
Q3UA81	[R].QTVAVGVIK.[AN]	Q3UA81 [431-439]
P05214; P68373; A0A0A0MQA5	[K].EDAANNYAR.[G]	P05214 [97-105]; P68373 [97-105]; A0A0A0MQA5 [126-134]
B7U582; P63017; B2CSK2; P17879	[R].TTPSYVAFTDTER.[L]	B7U582 [38-50]; P63017 [37-49]; B2CSK2 [39-51]; P17879 [37-49]
Q9CZI5	[K].VANVSLLALYK.[G]	Q9CZI5 [125-135]
P05214	[K].YMACCMLYR.[G]	P05214 [312-320]
E9Q1Z0	[K].LALDIEIATYR.[KR]	E9Q1Z0 [434-444]
Q3UA81	[K].QLIVGVNK.[M]	Q3UA81 [147-154]
Q7TMM9; Q9D6F9; Q9ERD7; P99024; P68372; Q922F4	[R].FPGQLNADLRK.[L]	Q7TMM9 [242-252]; Q9D6F9 [242-252]; Q9ERD7 [242-252]; P99024 [242-252]; P68372 [242-252]; Q922F4 [242-252]
P02535	[K].SEITELR.[R]	P02535 [361-367]
P04104	[R].TNAENEFVTIKK.[D]	P04104 [286-297]
A0A0A0MQF6	[R].VIISAPSADAPMFVMGVNHEK.[Y]	A0A0A0MQF6 [143-163]
Q7TMM9; Q9D6F9; Q9ERD7; P99024; P68372	[-].MREIVHIQAGQCGNQIGAK.[F]	Q7TMM9 [1-19]; Q9D6F9 [1-19]; Q9ERD7 [1-19]; P99024 [1-19]; P68372 [1-19]
Q6IFX2; Q9EQD6; P08730; Q61782; Q61781; Q9QWL7	[R].LEQEIATYR.[RSN]	Q6IFX2 [387-395]; Q9EQD6 [406-414]; P08730 [390-398]; Q61782 [30-38]; Q61781 [414-422]; Q9QWL7 [377-385]
B2RTP7	[R].DYQELMNTK.[L]	B2RTP7 [483-491]
Q8C1B2	[R].YTMGSHGMR.[R]	Q8C1B2 [596-604]
P02535	[R].ALEESNYELEGK.[I]	P02535 [164-175]
P05214	[K].YMACCMLYR.[G]	P05214 [312-320]
Q9D6F9	[K].MAATFIGNSTAIQELFK.[R]	Q9D6F9 [363-379]
P60710	[-R].GYSFTTTAER.[E]	P60710 [197-206]
Q8C1B2	[R].SLRPILNTLLESGSLDGVFR.[A]	Q8C1B2 [56-75]
Q7TMM9; Q9ERD7; P99024; P68372; Q922F4	[K].GHYTEGAELVDSVLDVVR.[K]	Q7TMM9 [104-121]; Q9ERD7 [104-121]; P99024 [104-121]; P68372 [104-121]; Q922F4 [104-121]
P05214; P68373; A0A0A0MQA5	[R].AFVHWYVGEGMEEGEFSEAR.[E]	P05214 [403-422]; P68373 [403-422]; A0A0A0MQA5 [432-451]
B2RTP7	[R].GFSSGSAVVSGGSR.[R]	B2RTP7 [23-36]
Q7TMM9; P99024; P68372	[K].EVDEQMLNVQNK.[N]	Q7TMM9 [325-336]; P99024 [325-336]; P68372 [325-336]
P60710	[R].VAPEEHPVLLTEAPLNPK.[AR]	P60710 [96-113]
Q3UA81	[K].IGGIGTVPVGR.[V]	Q3UA81 [256-266]
Q9D6F9; P99024; P68372	[R].KEAESCDCLQGFQLTHSLGGGTGSGMGTLLISK.[I]	Q9D6F9 [122-154]; P99024 [122-154]; P68372 [122-154]
P08730; P02535	[R].QSVEADINGLRR.[V]	P08730 [194-205]; P02535 [244-255]
P68373; A0A0A0MQA5	[K].YMACCLLYR.[G]	P68373 [312-320]; A0A0A0MQA5 [341-349]
P68373; A0A0A0MQA5	[K].YMACCLLYR.[G]	P68373 [312-320]; A0A0A0MQA5 [341-349]
Q8VED5	[R].NLDLDSIIAEVK.[A]	Q8VED5 [304-315]
Q8C1B2	[R].YTMGSHGMR.[R]	Q8C1B2 [596-604]
P05214; P68373; A0A0A0MQA5	[R].AFVHWYVGEGMEEGEFSEAR.[E]	P05214 [403-422]; P68373 [403-422]; A0A0A0MQA5 [432-451]
P99024	[K].MAVTFIGNSTAIQELFK.[R]	P99024 [363-379]
Q8C1B2	[K].LSTELFQDK.[S]	Q8C1B2 [207-215]
Q9D6F9; P99024; P68372	[K].EAESCDCLQGFQLTHSLGGGTGSGMGTLLISK.[I]	Q9D6F9 [123-154]; P99024 [123-154]; P68372 [123-154]
P08730; P02535	[R].QSVEADINGLR.[R]	P08730 [194-204]; P02535 [244-254]
P60710; P68134	[RK-].SYELPDGQVITIGNER.[F]	P60710 [239-254]; P68134 [241-256]
P05214; P68373; A0A0A0MQA5	[R].QLFHPEQLITGKEDAANNYAR.[G]	P05214 [85-105]; P68373 [85-105]; A0A0A0MQA5 [114-134]
Q8C1B2	[K].GVHFMFLAK.[V]	Q8C1B2 [582-590]
Q7TMM9; P68372	[K].MSATFIGNSTAIQELFK.[R]	Q7TMM9 [363-379]; P68372 [363-379]
Q9D6F9	[K].MAATFIGNSTAIQELFK.[R]	Q9D6F9 [363-379]
P05214; P68373; A0A0A0MQA5	[R].FDGALNVDLTEFQTNLVPYPR.[I]	P05214 [244-264]; P68373 [244-264]; A0A0A0MQA5 [273-293]
P05214; A0A0A0MQA5	[K].AYHEQLSVAEITNACFEPANQMVK.[C]	P05214 [281-304]; A0A0A0MQA5 [310-333]
Q9D6F9; P68372	[R].AVLVDLEPGTMDSVR.[S]	Q9D6F9 [63-77]; P68372 [63-77]
P05214; P68373; A0A0A0MQA5	[R].AVCMLSNTTAIAEAWAR.[L]	P05214 [374-390]; P68373 [374-390]; A0A0A0MQA5 [403-419]
Q7TMM9; Q9D6F9; Q9ERD7; P99024; P68372; Q922F4	[K].NMMAACDPR.[H]	Q7TMM9 [298-306]; Q9D6F9 [298-306]; Q9ERD7 [298-306]; P99024 [298-306]; P68372 [298-306]; Q922F4 [298-306]
P02535	[R].LENEIQTYR.[S]	P02535 [440-448]
Q9EQD6; P02535; Q61781	[KR].VTMQNLNDR.[L]	Q9EQD6 [115-123]; P02535 [146-154]; Q61781 [123-131]
Q6IFX2; Q61781; Q9QWL7	[R].VLDELTLAR.[AT]	Q6IFX2 [203-211]; Q61781 [230-238]; Q9QWL7 [193-201]
P05214; P68373; A0A0A0MQA5	[R].IHFPLATYAPVISAEK.[A]	P05214 [265-280]; P68373 [265-280]; A0A0A0MQA5 [294-309]
Q9D6F9; Q9ERD7; P68372; Q922F4	[R].ALTVPELTQQMFDAK.[N]	Q9D6F9 [283-297]; Q9ERD7 [283-297]; P68372 [283-297]; Q922F4 [283-297]
P05214; A0A0A0MQA5	[K].AYHEQLSVAEITNACFEPANQMVK.[C]	P05214 [281-304]; A0A0A0MQA5 [310-333]
Q8C1B2	[K].ASYSHNFSK.[K]	Q8C1B2 [569-577]
P05214; P68373; A0A0A0MQA5	[R].QLFHPEQLITGK.[E-]	P05214 [85-96]; P68373 [85-96]; A0A0A0MQA5 [114-125]
P04104	[R].TNAENEFVTIK.[K]	P04104 [286-296]
Q8C1B2	[K].GVHFMFLAK.[V]	Q8C1B2 [582-590]
P50446; Q8BGZ7; Q32P04	[R].SLDLDSIIAEVK.[A]	P50446 [316-327]; Q8BGZ7 [314-325]; Q32P04 [326-337]
Q8VED5; P11679; Q32P04	[K].NKYEDEINKR.[T]	Q8VED5 [228-237]; P11679 [183-192]; Q32P04 [250-259]
Q8C1B2	[R].IIYNLFHK.[T]	Q8C1B2 [476-483]
Q7TMM9; Q9D6F9; Q9ERD7; P99024; P68372; Q922F4	[K].NMMAACDPR.[H]	Q7TMM9 [298-306]; Q9D6F9 [298-306]; Q9ERD7 [298-306]; P99024 [298-306]; P68372 [298-306]; Q922F4 [298-306]
Q7TMM9; P99024; P68372; Q922F4	[K].IREEYPDR.[I]	Q7TMM9 [155-162]; P99024 [155-162]; P68372 [155-162]; Q922F4 [155-162]
P05214; P68373; A0A0A0MQA5	[R].AVCMLSNTTAIAEAWAR.[L]	P05214 [374-390]; P68373 [374-390]; A0A0A0MQA5 [403-419]
Q8C1B2	[R].LIEEANSR.[G]	Q8C1B2 [368-375]
E9PX52	[K].EIISEVQR.[M]	E9PX52 [422-429]
P05214; P68373; A0A0A0MQA5	[R].LDHKFDLMYAK.[RK]	P05214 [391-401]; P68373 [391-401]; A0A0A0MQA5 [420-430]
Q9D6F9; P99024; P68372	[K].EAESCDCLQGFQLTHSLGGGTGSGMGTLLISK.[I]	Q9D6F9 [123-154]; P99024 [123-154]; P68372 [123-154]
Q9D6F9; P68372	[R].AVLVDLEPGTMDSVR.[S]	Q9D6F9 [63-77]; P68372 [63-77]
P05214; P68373	[K].DVNAAIATIK.[T]	P05214 [327-336]; P68373 [327-336]
P99024	[R].ISVYYNEATGGK.[Y]	P99024 [47-58]
A0A0A0MQA5	[R].SIQFVDWCPTGFK.[V]	A0A0A0MQA5 [369-381]
Q7TMM9; Q9D6F9; Q9ERD7; P99024; P68372; Q922F4	[K].LAVNMVPFPR.[L]	Q7TMM9 [253-262]; Q9D6F9 [253-262]; Q9ERD7 [253-262]; P99024 [253-262]; P68372 [253-262]; Q922F4 [253-262]
Q7TMM9; Q9ERD7; P99024	[R].AILVDLEPGTMDSVR.[S]	Q7TMM9 [63-77]; Q9ERD7 [63-77]; P99024 [63-77]
E9Q0B5	[R].ISVINGGSK.[A]	E9Q0B5 [1352-1360]
P68372	[R].INVYYNEATGGK.[Y]	P68372 [47-58]
P05214; P68373	[K].TIGGGDDSFNTFFSETGAGK.[H]	P05214 [41-60]; P68373 [41-60]
Q9D6F9; P99024; P68372	[R].YLTVAAVFR.[G]	Q9D6F9 [310-318]; P99024 [310-318]; P68372 [310-318]
P05214; P68373; A0A0A0MQA5	[R].LDHKFDLMYAK.[RK]	P05214 [391-401]; P68373 [391-401]; A0A0A0MQA5 [420-430]
Q7TMM9; Q9D6F9; Q9ERD7; P99024; P68372; Q922F4	[R].FPGQLNADLR.[K]	Q7TMM9 [242-251]; Q9D6F9 [242-251]; Q9ERD7 [242-251]; P99024 [242-251]; P68372 [242-251]; Q922F4 [242-251]
P05214; P68373	[R].TIQFVDWCPTGFK.[V]	P05214 [340-352]; P68373 [340-352]
Q7TMM9	[R].YLTVAAIFR.[G]	Q7TMM9 [310-318]
Q7TMM9; Q9ERD7; P99024	[R].AILVDLEPGTMDSVR.[S]	Q7TMM9 [63-77]; Q9ERD7 [63-77]; P99024 [63-77]
P05214; P68373; A0A0A0MQA5	[R].NLDIERPTYTNLNR.[L]	P05214 [216-229]; P68373 [216-229]; A0A0A0MQA5 [245-258]
Q6IFX2; Q497I4; Q9EQD6; P08730; P05784; P02535; Q61781; Q9QWL7	[RK].LAADDFR.[TLVMS]	Q6IFX2 [174-180]; Q497I4 [177-183]; Q9EQD6 [193-199]; P08730 [177-183]; P05784 [152-158]; P02535 [227-233]; Q61781 [201-207]; Q9QWL7 [164-170]
Q7TMM9; Q9D6F9; Q9ERD7; P99024; P68372	[R].EIVHIQAGQCGNQIGAK.[F]	Q7TMM9 [3-19]; Q9D6F9 [3-19]; Q9ERD7 [3-19]; P99024 [3-19]; P68372 [3-19]
Q7TMM9; Q9D6F9; Q9ERD7; P99024; P68372	[R].ISEQFTAMFR.[R]	Q7TMM9 [381-390]; Q9D6F9 [381-390]; Q9ERD7 [381-390]; P99024 [381-390]; P68372 [381-390]
Q9D6F9; Q9ERD7; P99024; P68372	[R].IMNTFSVVPSPK.[V]	Q9D6F9 [163-174]; Q9ERD7 [163-174]; P99024 [163-174]; P68372 [163-174]
Q8C1B2	[R].HLFHGTSQDVVDGICK.[H]	Q8C1B2 [529-544]
Q9D6F9; Q9ERD7; P99024; P68372	[R].IMNTFSVVPSPK.[V]	Q9D6F9 [163-174]; Q9ERD7 [163-174]; P99024 [163-174]; P68372 [163-174]
Q8C1B2	[R].VQNQFLWEK.[Y]	Q8C1B2 [498-506]
Q9D6F9; Q9ERD7; P68372; Q922F4	[R].ALTVPELTQQMFDAK.[N]	Q9D6F9 [283-297]; Q9ERD7 [283-297]; P68372 [283-297]; Q922F4 [283-297]
E9Q0F0	[R].SLNNQFASFIDK.[V]	E9Q0F0 [111-122]
Q7TMM9; Q9D6F9; Q9ERD7; P99024; P68372	[R].ISEQFTAMFR.[R]	Q7TMM9 [381-390]; Q9D6F9 [381-390]; Q9ERD7 [381-390]; P99024 [381-390]; P68372 [381-390]
	[R].LGEHNINVLEGNEQFVNAAK.[I]
Q9Z1R9	[R].LGEHNINVLEGNEQFIDAAK.[I]	Q9Z1R9 [73-92]
Q8C1B2	[R].FYCNPENDR.[M]	Q8C1B2 [293-301]
Q9R0H5; P04104	[R].FLEQQNQVLQTK.[W]	Q9R0H5 [151-162]; P04104 [208-219]
P05214; P68373; A0A0A0MQA5	[K].VGINYQPPTVVPGGDLAK.[V]	P05214 [353-370]; P68373 [353-370]; A0A0A0MQA5 [382-399]
Q7TMM9; Q9D6F9; Q9ERD7; P99024; P68372; Q922F4	[K].LAVNMVPFPR.[L]	Q7TMM9 [253-262]; Q9D6F9 [253-262]; Q9ERD7 [253-262]; P99024 [253-262]; P68372 [253-262]; Q922F4 [253-262]
Q7TMM9; Q9D6F9; Q9ERD7; P99024; P68372; Q922F4	[K].NSSYFVEWIPNNVK.[TV]	Q7TMM9 [337-350]; Q9D6F9 [337-350]; Q9ERD7 [337-350]; P99024 [337-350]; P68372 [337-350]; Q922F4 [337-350]
