# Supplementary material for: Identification of PARP-7 substrates reveals a role for MARylation in microtubule control in ovarian cancer cells
Source: eLife. 2021 Jan 21;10:e60481. doi: 10.7554/eLife.60481 (PMC7884071; doi:10.7554/eLife.60481)
Supplement: Supplementary file 5. — OVCAR4 and HeLa cell cytosolic extracts were incubated with recombinant analog sensitive PARP-7 (asPARP-7) in the presence of 8-Bu(3-yne)T-NAD+. Following in vitro modification, the extract proteins were covalently linked to azido-agarose beads via copper-catalyzed cycloaddition. The conjugated beads were washed, trypsinized to release peptides for protein identification (Supplementary files 3 and 4), and then washed again. The remaining peptides containing ADP-ribosylation sites were eluted from the resin using hydroxylamine (NH2OH). The cleaved modification produces a 15.019 m/z shift identifying the specific site of glutamate or aspartate modification. Both the tryptic digest (PeptideID) and hydroxylamine eluate (SiteID) were subjected to LC-MS/MS analysis. The ‘Summary’ worksheet in this spreadsheet provides a summary of all data identifying sites of PARP-7-mediated ADPRylation on α-tubulin. The ‘Data’ worksheet provides mass spec data and annotation information describing the metrics of each of the LC-MS/MS-identified peptides. All analyses and numbering of amino acids are for human α-tubulin. [file elife-60481-supp5.xlsx]

## Sheet: Summary
Table S5. Identification of PARP-7-mediated sites of ADPRylation on α-tubulin using the NAD+ analog-sensitive approach.
OVCAR4 and HeLa cell cytosolic extracts were incubated with recombinant analog sensitive PARP-7 (asPARP-7) in the presence of 8-Bu(3-yne)T-NAD+. Following in vitro modification, the extract proteins were covalently linked to azido-agarose beads via copper-catalyzed cycloaddition. The conjugated beads were washed, trypsinized to release peptides for protein identification (Tables S3 and S4), and t…
	OVCAR4			HeLa
Q1ZYQ1	Peptide	Site in Peptide	Site in α-Tubulin	Peptide	Site in Peptide	Site in α-Tubulin
Repl. 1	AVFVDLEPTVVDEVR	D5	D69	AVFVDLEPTVVDEVR	E13	E77
				TIGGGDDSFNTFFSETGAGK	E15	E55
				AYHEQLSVAEITNACFEPANQMVK	E10	E290
Repl. 2	AVFVDLEPTVVDEVR	E13	E77	AVFVDLEPTVVDEVR	E7	E71
	QLFHPEQLITGKEDAANNYAR	E6	E90
	AYHEQLSVAEITNACFEPANQMVK	E10	E290
	AYHEQLSVAEITNACFEPANQMVK	E17	E297
	All sites identified in human α-tubulin	Sites explored in detail
	E55, D69, E71, E77, E90, E290, E297	D69, E71, E77

## Sheet: Data
Checked	Confidence	Sequence	Modifications	Qvality PEP	Qvality q-value	# Protein Groups	# Proteins	# PSMs	Master Protein Accessions	# Missed Cleavages	Theo. MH+ [Da]	XCorr Sequest HT	Confidence Sequest HT	Percolator q-Value Sequest HT	Percolator PEP Sequest HT
OVCAR3 Replicate 1
TRUE	High	AVFVDLEPTVVDEVR	1xHydroxamic_acid [D5(100)]	0.0397665	0	1	2	4	Q1ZYQ1	0	1702.9	4.21	High	0	0.00893
OVCAR3 Replicate 2
TRUE	High	AVFVDLEPTVIDEVR	1xHydroxamic_acid [E7(92.5)]	0.0060926	0	1	18	3	P68363	0	1716.92	3.52	High	0	0.04151
TRUE	High	AVFVDLEPTVVDEVR	1xHydroxamic_acid [E13(93.9)]	0.00272933	0	1	2	9	Q1ZYQ1	0	1702.9	4.24	High	0	0.002417
TRUE	High	AYHEQLSVAEITNACFEPANQMVK	1xCarbamidomethyl [C15]; 1xOxidation [M22(100)]; 1xHydroxamic_acid [E17(100)]	0.0137477	0	3	12	2	Q1ZYQ1; P68363; P68366	0	2781.3	4.16	High	0	0.01243
TRUE	High	AYHEQLSVAEITNACFEPANQMVK	1xCarbamidomethyl [C15]; 1xHydroxamic_acid [E10(100)]	0.01523	0	3	12	3	Q1ZYQ1; P68363; P68366	0	2765.3	3.54	High	0	0.01382
TRUE	High	QLFHPEQLITGKEDAANNYAR	1xHydroxamic_acid [E6(100)]	0.0176149	0	3	27	1	Q1ZYQ1; P68363; P68366	1	2430.22	2.73	High	0	0.01598
HeLa Replicate 1
TRUE	High	AVFVDLEPTVIDEVR	1xHydroxamic_acid [E13(94)]	0.0350759	0	1	18	3	A8JZY9	0	1716.92	4.02	High	0	0.03659
TRUE	High	AVFVDLEPTVVDEVR	1xHydroxamic_acid [E13(94.5)]	0.0233194	0	1	2	3	Q1ZYQ1	0	1702.9	4.44	High	0	0.05814
TRUE	High	TIGGGDDSFNTFFSETGAGK	1xHydroxamic_acid [E15(100)]	0.00557473	0	2	22	1	Q1ZYQ1; A8JZY9	0	2022.9	4.84	High	0	0.006147
TRUE	High	AYHEQLSVAEITNACFEPANQMVK	1xCarbamidomethyl [C15]; 1xOxidation [M22(100)]; 1xHydroxamic_acid [E10(100)]	0.00869162	0	2	12	1	Q1ZYQ1; A8JZY9	0	2781.3	4.37	High	0	0.009449
HeLa Replicate 1
TRUE	High	AVFVDLEPTVIDEVR	1xHydroxamic_acid [E7(99.5)]	0.110633	0	1	18	2	A8JZY9	0	1716.92	4.67	High	0	0.04924
TRUE	High	AVFVDLEPTVVDEVR	1xHydroxamic_acid [E7(93.8)]	0.00946301	0	1	2	6	Q1ZYQ1	0	1702.9	4.28	High	0	0.001282
