# Supplementary figures and images for: Identification of PARP-7 substrates reveals a role for MARylation in microtubule control in ovarian cancer cells
Source: eLife journal article supplement (doi:10.7554/elife.60481), 2021-01-21

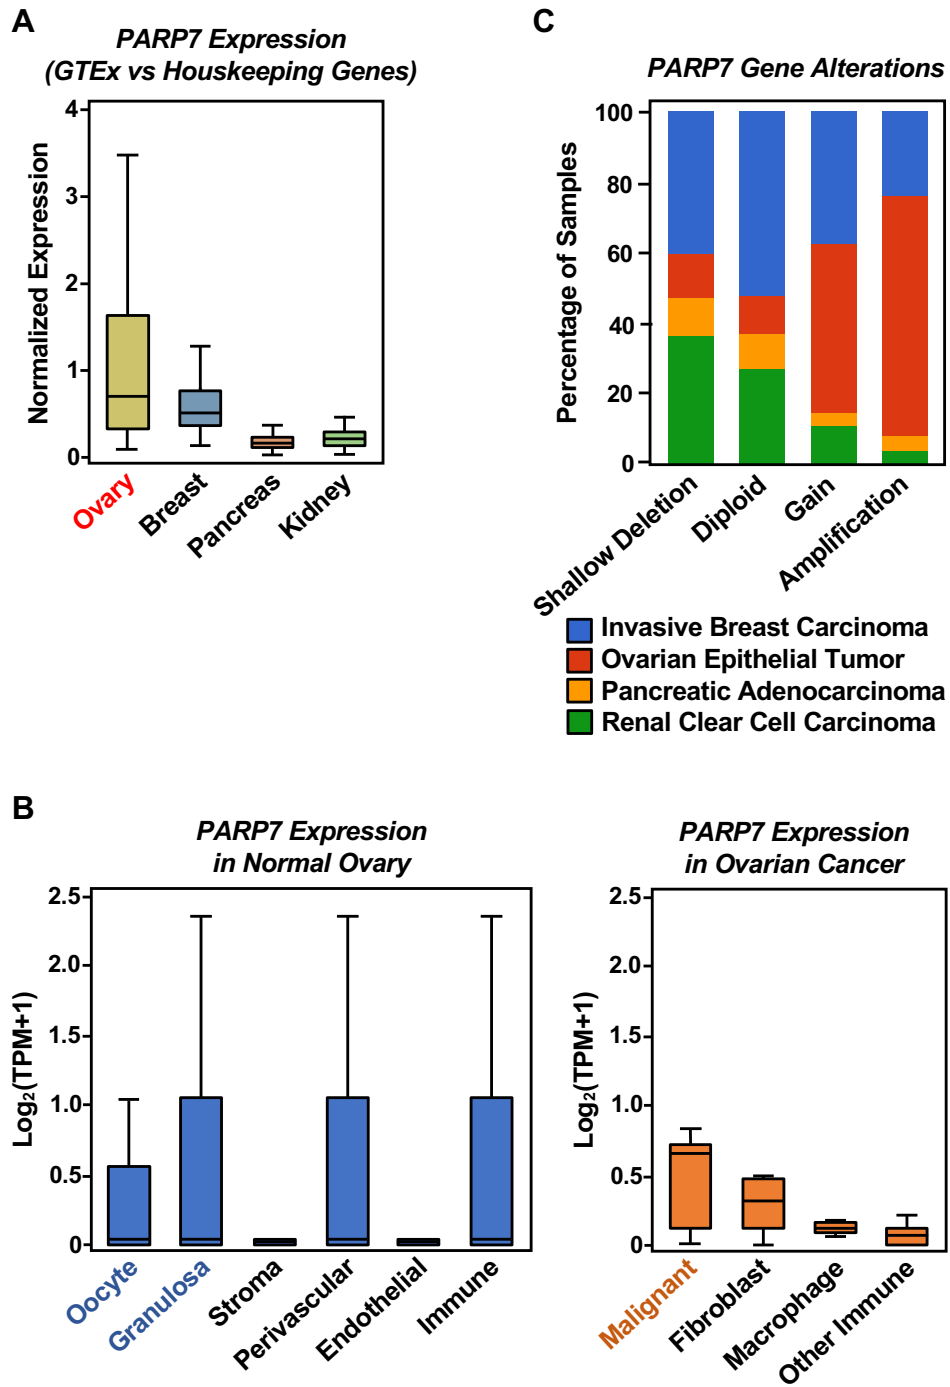

Figure 1 – figure supplement 1

Supplement: supp [file elife_poa_e60481_Figure_1_figure_supplement_1.pdf › elife_poa_e60481_Figure_1_figure_supplement_1.pdf]

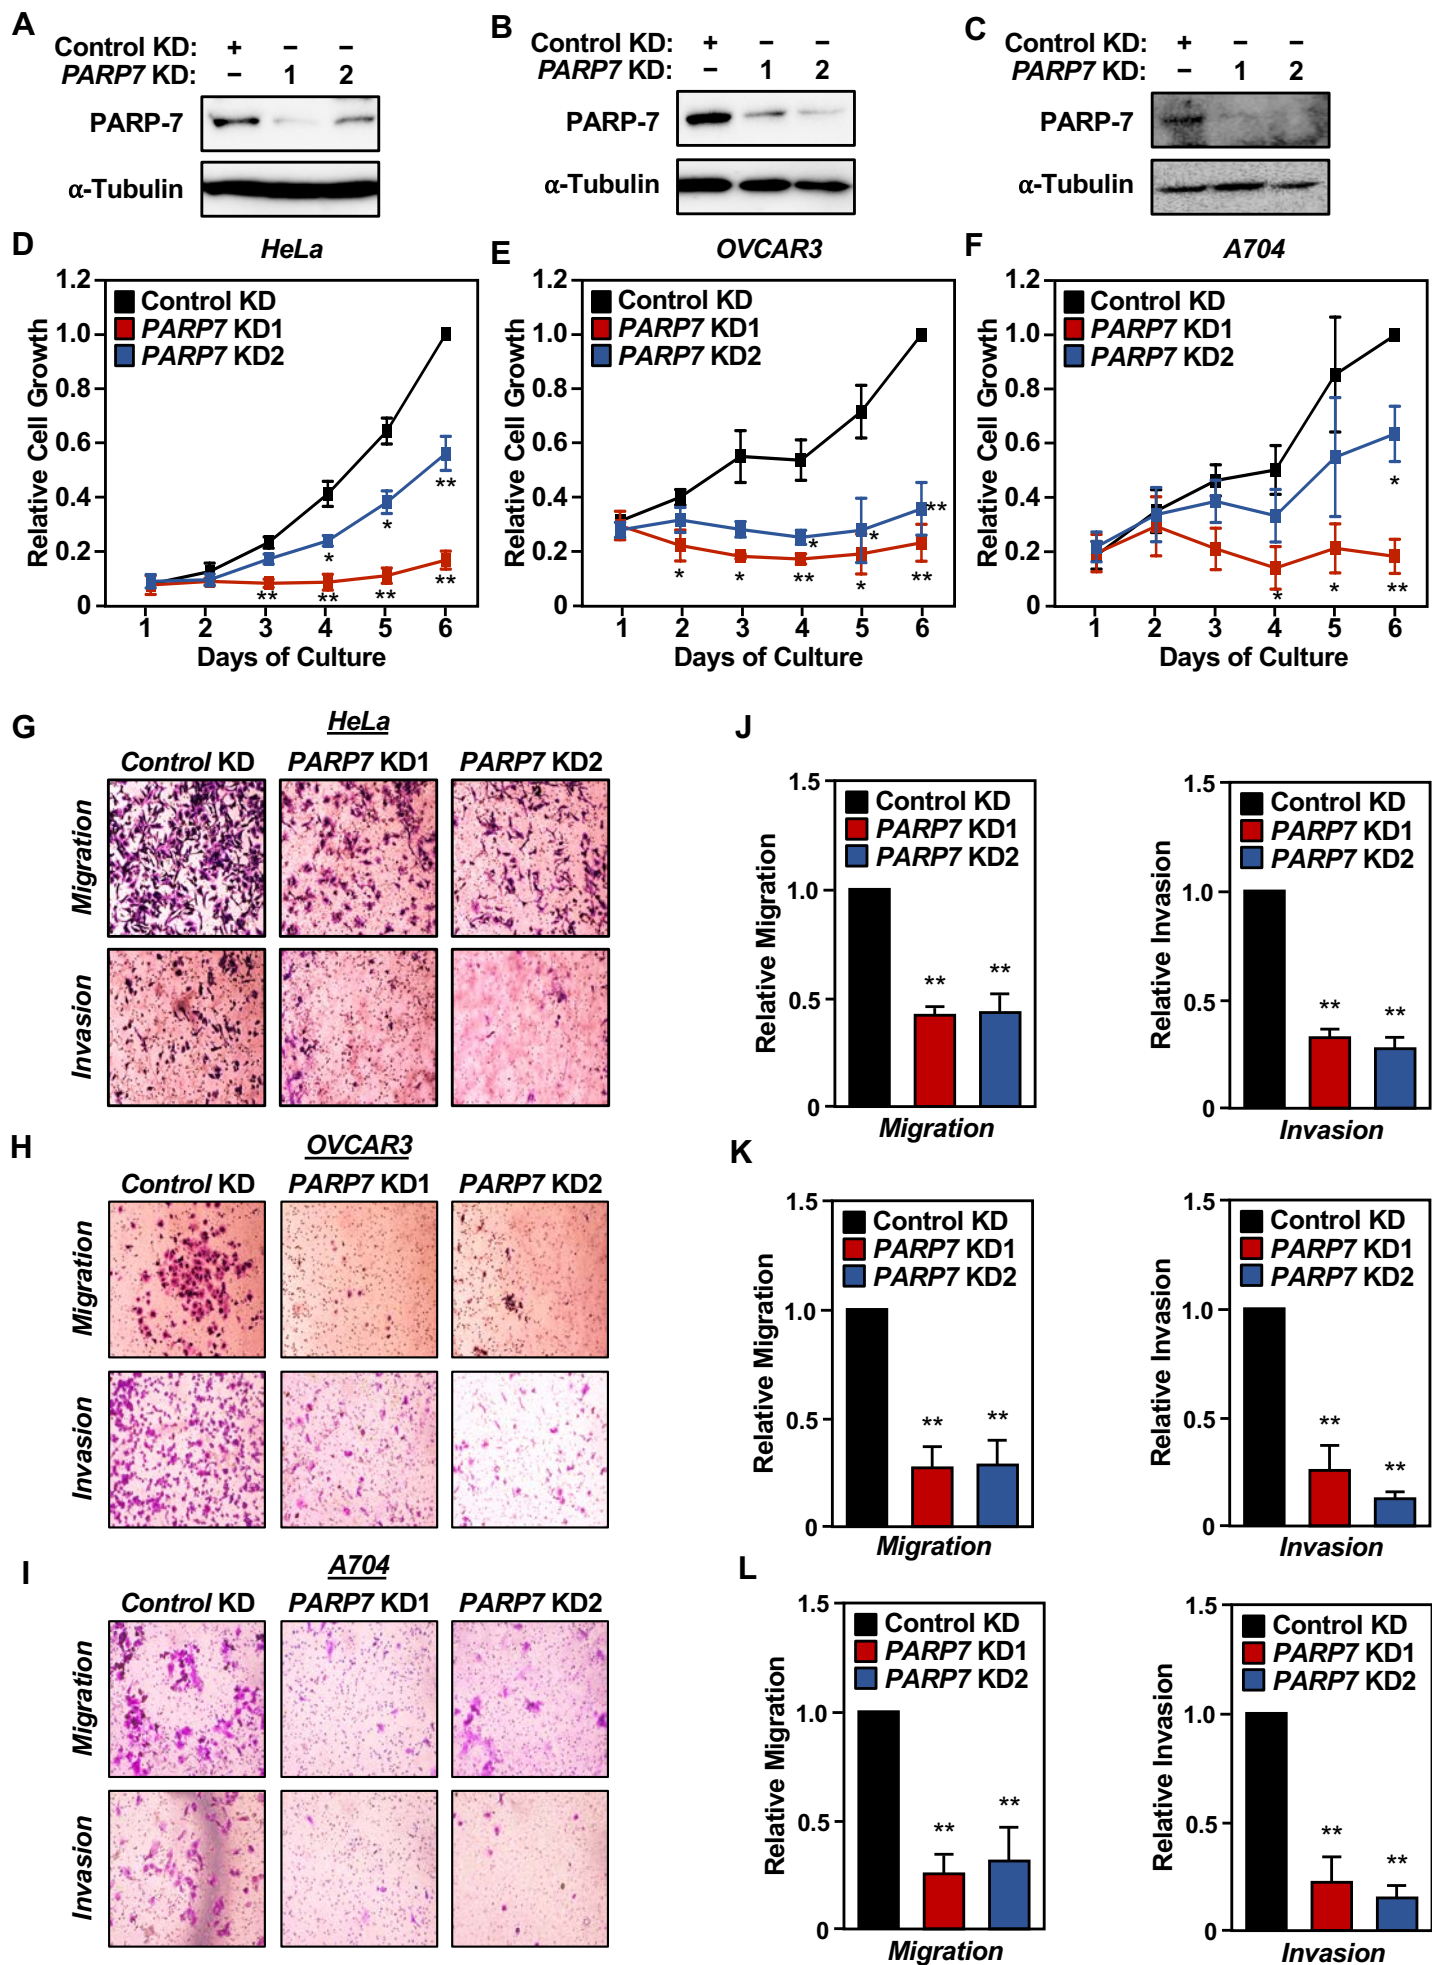

Figure 1 – figure supplement 2

Supplement: supp [file elife_poa_e60481_Figure_1_figure_supplement_2.pdf › elife_poa_e60481_Figure_1_figure_supplement_2.pdf]

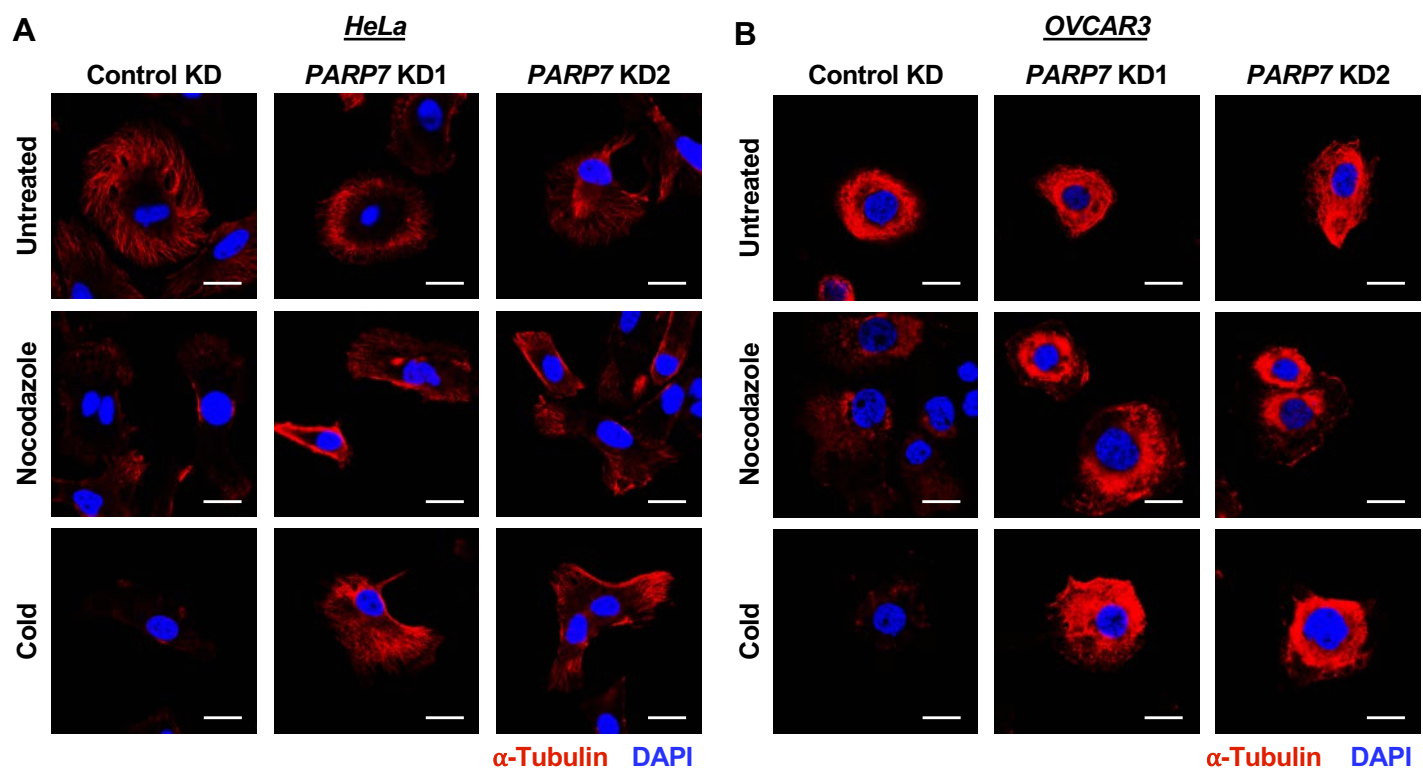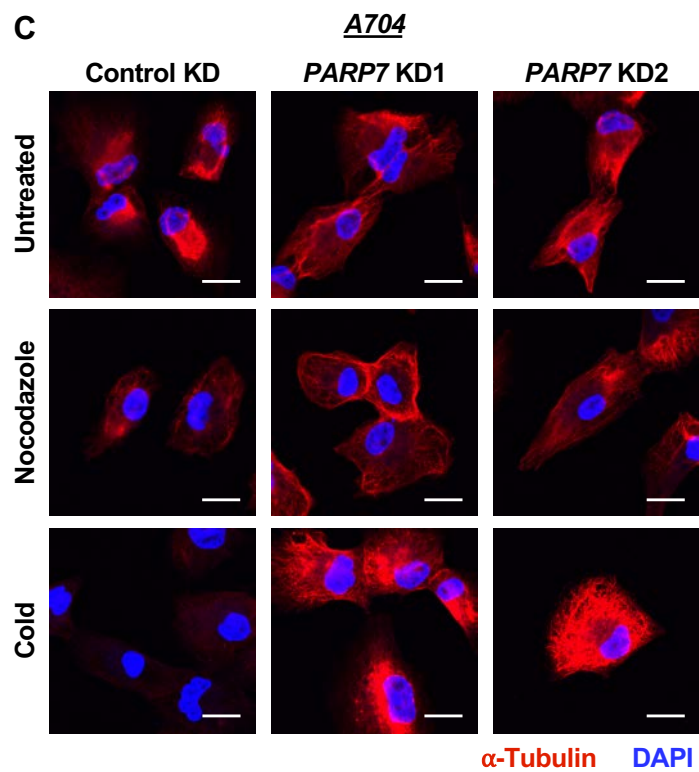

Figure 7 – figure supplement 1

Supplement: supp [file elife_poa_e60481_Figure_7_figure_supplement_1.pdf › elife_poa_e60481_Figure_7_figure_supplement_1.pdf]

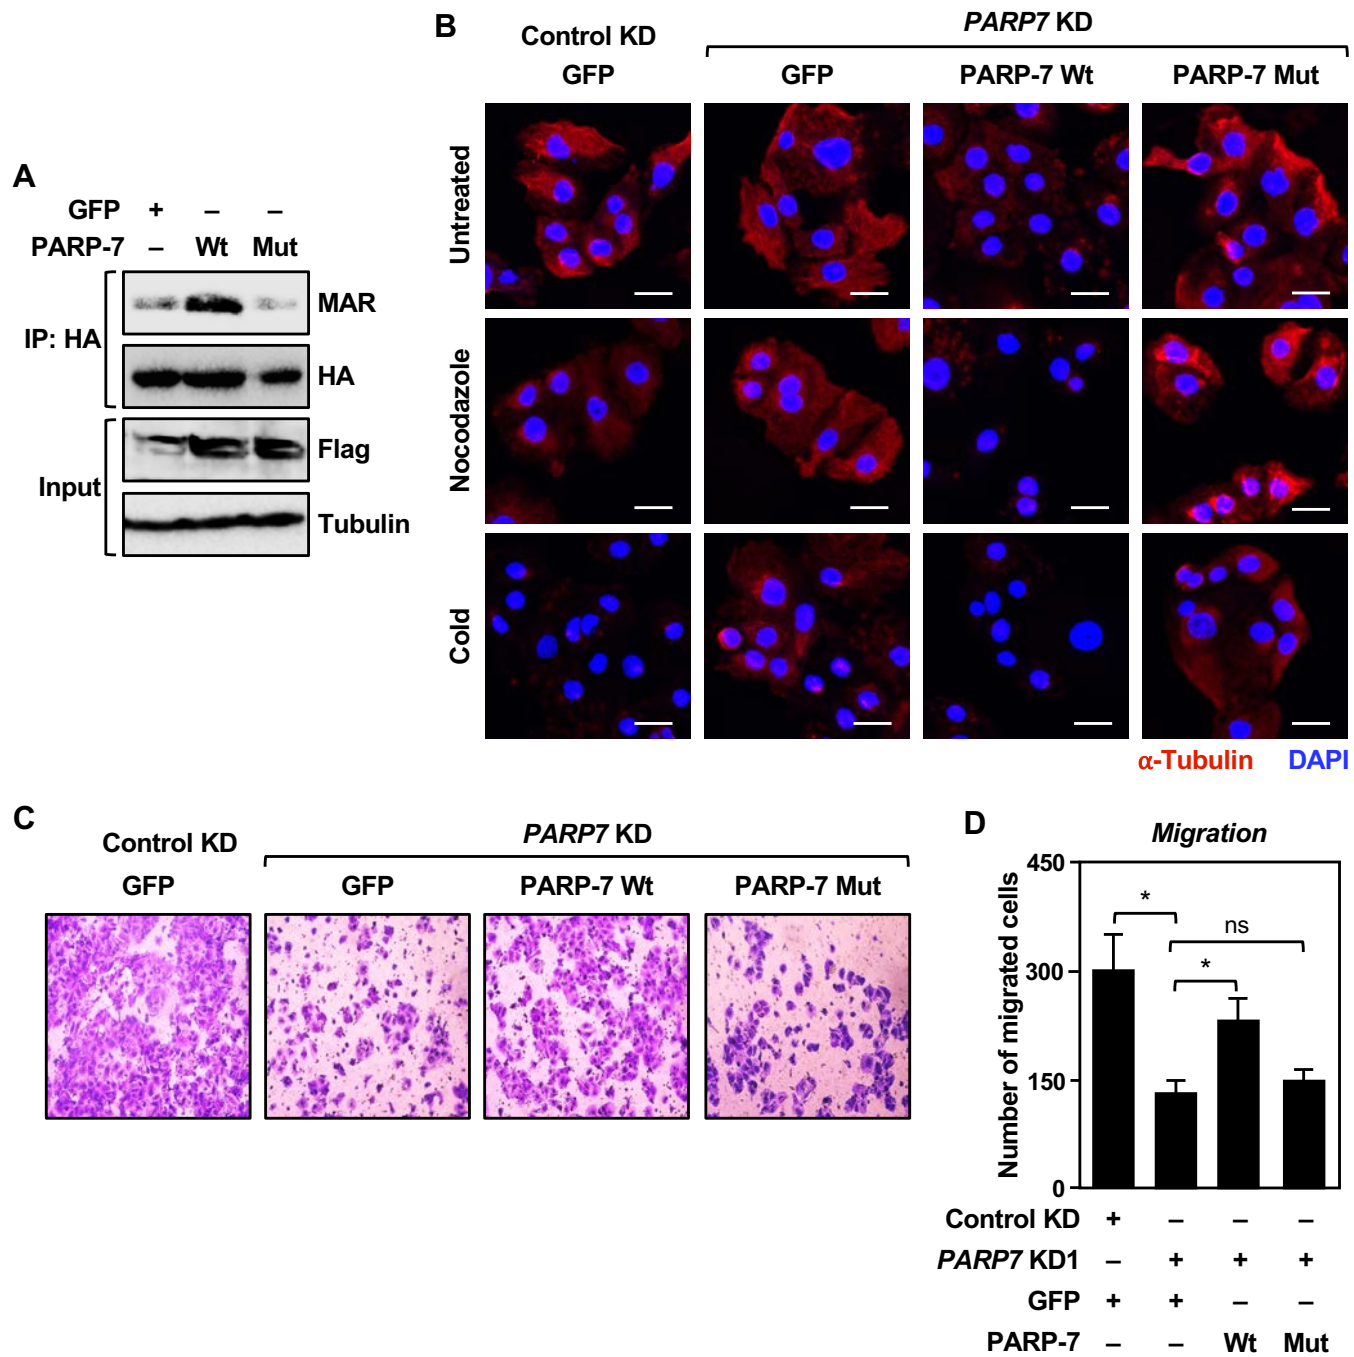

Figure 7 – figure supplement 2

Supplement: supp [file elife_poa_e60481_Figure_7_figure_supplement_2.pdf › elife_poa_e60481_Figure_7_figure_supplement_2.pdf]
